# Supplementary material
Source: PubMed Central journal article supplement (PMC5753601)

# Mechanism-based enhancement of scope and enantioselectivity for reactions involving a copper-substituted stereogenic carbon centre

Jaehee Lee, Suttipol Radomkit, Sebastian Torker, Juan del Pozo and Amir H. Hoveyda\*

*Department of Chemistry, Merkert Chemistry Center, Boston College, Chestnut Hill, Massachusetts 02467, USA*

## SUPPLEMENTARY INFORMATION

E-mail: amir.hoveyda@bc.edu

### *Table of Contents*

|                                                                                                                                                                                |    |
|--------------------------------------------------------------------------------------------------------------------------------------------------------------------------------|----|
| 1. Bibliography: Enantioselective Formation of Metal-substituted Stereogenic Carbon Centres .....                                                                              | 3  |
| 2. General.....                                                                                                                                                                | 4  |
| 3. Reagents .....                                                                                                                                                              | 5  |
| 4. Examination of Different Types of Chiral Cu Complexes .....                                                                                                                 | 10 |
| 5. Representative Procedure for the Catalytic Enantioselective Boron-Allyl Addition to Aryl Alkenes .....                                                                      | 11 |
| 6. Additional Examples of Single-Catalyzed Multicomponent Reaction .....                                                                                                       | 21 |
| 7. Formal Synthesis of (+)-Heliespirone A and (-)-Heliespirone C .....                                                                                                         | 27 |
| 8. Additional Studies Regarding the Effect of Concentration Changes on Enantioselectivity .....                                                                                | 30 |
| 9. Study of the Possibility of Epimerization through Isotopic Labeling .....                                                                                                   | 31 |
| 10. Study of the Possibility of Homolytic versus Heterolytic Cu–C Bond Cleavage.....                                                                                           | 39 |
| 11. Relative Reactivity of Allylphosphate and Allylphenyl Carbonate .....                                                                                                      | 41 |
| 12. Relevance to Catalytic Processes that Involve Cu–H Additions.....                                                                                                          | 42 |
| 13. Studies Regarding the Two-Catalyst (Cu/Pd) Approach .....                                                                                                                  | 43 |
| 14. Spectroscopic Studies of Bis-Phosphine–Cu Complexes .....                                                                                                                  | 44 |
| 15. Determination of Absolute Stereochemistry .....                                                                                                                            | 53 |
| 16. Data for X-ray Crystallography of 38 .....                                                                                                                                 | 53 |
| 17. Representative Products of Bis-Phosphine–Cu-Catalyzed Reactions.....                                                                                                       | 59 |
| 18. Density Functional Theory (DFT) Calculations.....                                                                                                                          | 60 |
| Background .....                                                                                                                                                               | 62 |
| Questions to be Addressed .....                                                                                                                                                | 62 |
| Stereochemical Model for Addition of L3a–Cu–B(pin) to an Aryl Olefin (Figure 1.1–1.2).....                                                                                     | 63 |
| Influence of Electronic Attributes of Aryl Olefins on the Barriers for Cu–B(pin) Addition, $\beta$ -Hydride (Cu–H)<br>Elimination and Allylic Substitution (Figures 2–3) ..... | 67 |
| Differences Between Density Functionals in Figures 2–3 .....                                                                                                                   | 74 |

|                                                                                                                                                                                                                    |            |
|--------------------------------------------------------------------------------------------------------------------------------------------------------------------------------------------------------------------|------------|
| Regarding Displacement of a Bis-phosphine from a Cu Complex by an Aryl Olefin or a Solvent Molecule (Figures 4–7)                                                                                                  | 75         |
| Differences Between Density Functionals and the Negative Impact that an Aryl Olefins Might Have on Enantioselectivity (Figure 6.2)                                                                                 | 84         |
| Coordinating Affinity of Aryl Olefins to Cu <i>Ot</i> -Bu, Cu <i>Ot</i> -Bu dimer, Cu( <i>Ot</i> -Bu) <sub>2</sub> <sup>-</sup> and Cu( <i>Ot</i> -Bu) <sub>2</sub> <sup>-</sup> Na <sup>+</sup> (cf. Figures 8–9) | 84         |
| Factors that Impact S <sub>N</sub> 2' Selectivity (Figure 10)                                                                                                                                                      | 85         |
| <b>19. Energies and Gibbs Free Energies</b>                                                                                                                                                                        | <b>94</b>  |
| Optimization in Figures 1–10 with ωB97XD/Def2SVP in THF(SMD)                                                                                                                                                       | 94         |
| Single point energies in Figures 1–10 with ωB97XD, M06 and MN12SX                                                                                                                                                  | 103        |
| Single point energies in Figures 1–10 with MN12L and M06L                                                                                                                                                          | 112        |
| Single point energies in Figures 1–10 with BP86-D3BJ and PBE0-D3BJ                                                                                                                                                 | 121        |
| <b>20. Coordinates after optimization with ωB97XD/Def2SVP in THF(SMD)</b>                                                                                                                                          | <b>130</b> |
| <b>21. NMR Spectra</b>                                                                                                                                                                                             | <b>457</b> |

## 1. Bibliography: Enantioselective Formation of Metal-substituted Stereogenic Carbon Centres

- (a) Wang, Y.-M., Bruno, N. C., Placeres, Á. L., Zhu, S. & Buchwald, S. L. Enantioselective synthesis of carbo- and heterocycles through a CuH-catalyzed hydroalkylation approach. *J. Am. Chem. Soc.* **137**, 10524–10527 (2015).
- (b) Ascic, E. & Buchwald, S. L. Highly diastereo- and enantioselective CuH-catalyzed synthesis of 2,3-disubstituted indolines. *J. Am. Chem. Soc.* **137**, 4666–4669 (2015).
- (c) Shi, S.-l., Wong, Z. I. & Buchwald, S. L. Copper-catalysed enantioselective stereodivergent synthesis of amino alcohols. *Nature* **532**, 353–356 (2016).
- (d) Zhu, S., Niljianskul, N. & Buchwald, S. L. A direct approach to amines with remote stereocentres by enantioselective CuH-catalysed reductive relay hydroamination. *Nat. Chem.* **8**, 144–150 (2016).

### Examples Not Generate Stereogenic Carbon Centers at Benzylic Position.

- (e) Feng, X., Jeon, H. & Yun, J. Regio- and enantioselective copper(I)-catalyzed hydroboration of borylalkenes: Asymmetric synthesis of 1,1-diborylalkanes. *Angew. Chem. Int. Ed.* **52**, 3989–3992 (2013).
- (f) Zhu, S. & Buchwald, S. L. Enantioselective CuH-catalyzed anti-Markovnikov hydroamination. *J. Am. Chem. Soc.* **136**, 15913–15916 (2014).
- (g) Meng, F., Haeffner, F. & Hoveyda, A. H. Diastereo- and enantioselective reactions of bis(pinacolato)diboron, 1,3-enynes, and aldehydes catalyzed by an easily accessible bisphosphine–Cu complex. *J. Am. Chem. Soc.* **136**, 11304–11307 (2014).
- (h) Yang, Y., Shi, S.-L., Niu, D., Liu, P. & Buchwald, S. L. Catalytic asymmetric hydroamination of unactivated internal olefins to aliphatic amines. *Science* **349**, 62–66 (2015).
- (i) Sakae, R., Hirano, K., Satoh, T. & Miura, M. Copper-catalyzed stereoselective aminoboration of bicyclic alkenes. *Angew. Chem. Int. Ed.* **54**, 613–617 (2015).

### More Examples without *Highly Electron Deficient* Aryl Olefins

- (j) Ascic, E. & Buchwald, S. L. Highly diastereo- and enantioselective CuH-catalyzed synthesis of 2,3-disubstituted indolines. *J. Am. Chem. Soc.* **137**, 4666–4669 (2015).
- (k) Jia, T., Cao, P., Wang, D., Lou, Y. & Liao, J. Copper-catalyzed asymmetric three-component borylstannation: enantioselective formation of C–Sn bond. *Chem. Eur. J.* **21**, 4918–4922 (2015).

### More Example with *Highly Electron Deficient* Aryl Olefins but *Lower Selectivity*.

- (l) Zhong, C., Kunii, S., Kosaka, Y., Sawamura, M. & Ito, H. Enantioselective synthesis of *trans*-aryl- and -heteroaryl-substituted cyclopropylboronates by copper(I)-catalyzed reactions of allylic phosphates with a diboron derivative. *J. Am. Chem. Soc.* **132**, 11440–11442 (2010).

### More Example with *Less Reactive (electron rich) Electrophile* but *Low Selectivity*.

- (m) Choi, B., Saxena, A., Smith, J. J., Churchill, G. H. & Lam, W. L. Enantioselective copper-catalyzed reductive coupling of vinylazaarenes with N-Boc aldimines. *Synlett.* **26**, 350–354 (2015).

### More Examples with *Highly Electron Deficient* Aryl Olefins and *High Selectivity* (1.2 to 5.0

**equivalent of electrophiles were used).**

- (n) Zhu, S., Niljianskul, N. & Buchwald, S. L. Enantio- and regioselective CuH-catalyzed hydroamination of alkenes. *J. Am. Chem. Soc.* **135**, 15746–15749 (2013).
- (o) Niu, D. & Buchwald, S. L. Design of modified amine transfer reagents allows the synthesis of  $\alpha$ -chiral secondary amines via CuH-catalyzed hydroamination. *J. Am. Chem. Soc.* **137**, 9716–9721 (2015).
- (p) Wang, Y-M. & Buchwald, S. L. Enantioselective CuH-catalyzed hydroallylation of vinylarenes. *J. Am. Chem. Soc.* **138**, 5024–5027 (2016).
- (q) For non-enantioselective example, see: Smith, K. B., Logan, K. M., You, W. & Brown, K. M. Alkene carboboration enabled by synergistic catalysis. *Chem. Eur. J.* **20**, 12032–12036 (2014); Semba, K. & Nakao, Y. Arylboration of alkenes by cooperative palladium/copper catalysis. *J. Am. Chem. Soc.* **136**, 7567–7570 (2014); Logan, K. M. & Brown, M. K. Copper/palladium synergistic catalysis for the *syn*- and *anti*-selective carboboration of alkenes. *Angew. Chem. Int. Ed.* **54**, 5228–5231 (2015); Kato, K., Hirano, K. & Miura, M. Synthesis of  $\beta$ -boryl- $\alpha$ -aminosilanes by copper-catalyzed aminoboration of vinylsilanes. *Angew. Chem. Int. Ed.* **55**, 14400–14404 (2016).

## 2. General

Infrared (IR) spectra were recorded on a Bruker FT-IR Alpha (ATR mode) spectrophotometer,  $\nu_{\max}$  in  $\text{cm}^{-1}$ . Bands are characterized as broad (br), strong (s), medium (m), and weak (w).  $^1\text{H}$  NMR spectra were recorded on Varian Unity INOVA 400 (400 MHz), 500 (500 MHz), or 600 (600 MHz) spectrometers. Chemical shifts are reported in ppm from tetramethylsilane with the solvent resonance as the internal standard ( $\text{CDCl}_3$ ;  $\delta$  7.26 ppm). Data are reported as follows: chemical shift, integration, multiplicity (s = singlet, d = doublet, t = triplet, q = quartet, pent = pentet, m = multiplet, br = broad, app = apparent), and coupling constants (Hz).  $^{13}\text{C}$  NMR spectra were recorded on Varian Unity INOVA 400 (100 MHz), 500 (125 MHz), or 600 (150 MHz) spectrometers with complete proton decoupling. Chemical shifts are reported in ppm from tetramethylsilane with the solvent resonance as the internal standard ( $\text{CDCl}_3$ ;  $\delta$  77.16 ppm). High-resolution mass spectrometry was performed on a JEOL AccuTOF DART (positive mode) at the Mass Spectrometry Facility, Boston College. Enantiomeric ratios were determined by HPLC analysis (high-performance liquid chromatography) with a Shimadzu chromatograph [Chiral Technologies Chiralcel AZ-H (4.6 x 250 mm), Chiral Technologies Chiralcel OC-H (4.6 x 250 mm), Chiral Technologies Chiralcel OD-H (4.6 x 250 mm), Chiral Technologies Chiralcel OJ-H (4.6 x 250 mm), Chiral Technologies Chiralcel OZ-H (4.6 x 250 mm), or Chiral Technologies Chiralpak AD-H (4.6 x 250 mm)] in comparison with authentic racemic materials. Specific rotations were measured on a Rudolph Research Analytical Autopol IV Polarimeter. Melting points were measured on a Thomas Hoover capillary melting point apparatus and are uncorrected. X-ray structures were obtained, as described in the cif file, with a Microfocus sealed Cu tube from Incote. It is well established that that aforementioned detector allows for the determination of absolute configuration of molecules that do not have a heavy atom.

Unless otherwise noted, reactions were carried out with distilled and degassed solvents under an atmosphere of dry N<sub>2</sub> in oven- (135 °C) or flame-dried glassware with standard dry box or vacuum-line techniques. Hexanes was purified under a positive pressure of dry argon by a modified Innovative Technologies purification system through a copper oxide and alumina column. Tetrahydrofuran (thf; Aldrich Chemical Co.) was purified by distillation from sodium benzophenone ketyl immediately prior to use. All work-up and purification procedures were carried out with reagent grade solvents (purchased from Fisher Scientific) under air.

### 3. Reagents

**Allyl phenyl carbonate (1e):** purchased from Aldrich and used as received.

**Allyl *tert*-butyl carbonate (1f):** prepared according to a previously reported procedure.<sup>1</sup>

**Bis(pinacolato)diboron [B<sub>2</sub>(pin)<sub>2</sub>]:** purchased from Frontier Scientific, Inc., recrystallized from pentane and dried under vacuum prior to use.

***n*-Butyllithium (1.6 M in hexanes):** purchased from Aldrich and used as received.

**Chlorotrimethylsilane:** purchased from Acros and used as received.

**Copper(I) chloride:** purchased from Strem and used as received.

**Deuterium oxide (D<sub>2</sub>O):** purchased from Cambridge Isotope Laboratories and used as received.

**Diethyl allyl phosphate (1a):** purchased from Aldrich and used as received.

**Diisobutylaluminum hydride (dibal-H):** purchased neat from Aldrich and used as received.

**Di-*tert*-butyl-dicarbonate (Boc<sub>2</sub>O):** purchased from Advanced ChemTech and used as received.

**Hoveyda-Grubbs catalyst 2<sup>nd</sup> generation:** purchased from Aldrich and used as received.

**Hydrogen peroxide (30 wt % in H<sub>2</sub>O):** purchased from Aldrich and used as received.

**Imidazolium salt NHC-1, 2, 3, 4, and 5:** prepared according to a previously reported procedure.<sup>2</sup>

**Imidazolium salt NHC-6:** prepared according to a previously reported procedure.<sup>3</sup>

**Imidazolium salt NHC-7:** prepared according to a previously reported procedure.<sup>4</sup>

**2-Isopropoxy-4,4,5,5-tetramethyl-1,3,2-dioxaborolane [*i*-PrOB(pin)]:** purchased from Aldrich and used as received.

**Oxone®, monopersulfate compound:** purchased from Aldrich and used as received.

**Phosphine L1:** prepared according to a previously reported procedure.<sup>5</sup>

**Phosphine ligands (L2, 3a–c, 4, 5, and 6):** purchased from Strem and used as received.

(1) Zhang, P., Brozek, L. A. & Morken, J. P. *J. Am. Chem. Soc.* **132**, 10686–10688 (2010).

(2) Lee, K-s. & Hoveyda, A. H. *J. Org. Chem.* **74**, 4455–4462 (2009).

(3) (a) Brown, M. K., May, T. L., Baxter, C. A. & Hoveyda, A. H. *Angew. Chem. Int. Ed.* **46**, 1097–1100 (2007). (b) May, T. L., Brown, M. K. & Hoveyda, A. H. *Angew. Chem. Int. Ed.* **47**, 7468–7472 (2008).

(4) Clavier, H., Coutable, L., Toupet, L., Guillemin, J.-C. & Mauduit, M. *J. Organomet. Chem.* **690**, 5237–5254 (2005).

(5) Jia, T., Cao, P., Wang, B., Lou, Y., Yin, X., Wang, M. & Liao, J. *J. Am. Chem. Soc.* **137**, 13760–13763 (2015).

**Pyridinium dichromate (PDC):** purchased from Aldrich and used as received.

**Sodium *tert*-butoxide:** purchased from Strem and used as received.

**Sodium hydroxide (2 M):** prepared from NaOH purchased from Fisher (used as received) and deionized water.

**Sulfuric acid:** purchased from Fisher and used as received.

**Tetrabutylammonium fluoride (tba<sup>f</sup>, 1.0 M in thf):** purchased from Oakwood and used as received.

**Preparation of aryl or heteroaryl olefins:** unless otherwise noted, olefins were purchased from Acros, Aldrich, Alfa Aesar, Combi-Blocks, Matrix Scientific, or TCI, and distilled over CaH<sub>2</sub> under reduced pressure prior to use.

The following olefins were synthesized from the corresponding aldehydes by Wittig olefination.<sup>6</sup>

**1,4-Dimethoxy-2-methyl-5-vinylbenzene (9):** Melting point: 41–42°C. IR (neat): 2995 (w), 2935 (w), 2830 (w), 1623 (w), 1501 (s), 1464 (m), 1416 (m), 1399 (m), 1207 (s), 1182 (m), 1042 (s), 996 (m), 902 (m) cm<sup>-1</sup>; <sup>1</sup>H NMR (400 MHz, CDCl<sub>3</sub>): δ 7.02 (1H, dd, *J* = 18.0, 11.2 Hz), 6.95 (1H, s), 6.70 (1H, s), 5.68 (1H, dd, *J* = 17.8, 1.4 Hz), 5.22 (1H, dd, *J* = 11.2, 1.2 Hz), 3.82 (3H, s), 3.80 (3H, s), 2.23 (3H, s); <sup>13</sup>C NMR (100 MHz, CDCl<sub>3</sub>): δ 152.0, 150.8, 131.7, 127.5, 124.5, 114.7, 113.3, 108.2, 56.4, 55.9, 16.4; HRMS (DART): Calcd for C<sub>11</sub>H<sub>15</sub>O<sub>2</sub> [M+H]<sup>+</sup>: 179.1072, Found: 179.1069.

**1-(Allyloxy)-3-vinylbenzene (substrate for 2aj and 2ak):** The spectroscopic data match those reported previously.<sup>7</sup> <sup>1</sup>H NMR (400 MHz, CDCl<sub>3</sub>): δ 7.24 (1H, t, *J* = 8.0 Hz), 7.03–6.96 (2H, m), 6.83 (1H, ddd, *J* = 8.2, 2.6, 0.9 Hz), 6.68 (1H, dd, *J* = 17.6, 10.8 Hz), 6.07 (1H, ddt, *J* = 17.3, 10.6, 5.3 Hz), 5.73 (1H, dd, *J* = 17.6, 0.9 Hz), 5.43 (1H, dq, *J* = 17.3, 1.6 Hz), 5.29 (1H, dq, *J* = 10.5, 1.4 Hz), 5.25 (1H, dd, *J* = 10.9, 0.9 Hz), 4.56 (2H, dt, *J* = 5.3, 1.5 Hz).

**2-Vinylbenzofuran (substrate for 2ag):** The spectroscopic data match those reported previously.<sup>8</sup> <sup>1</sup>H NMR (400 MHz, CDCl<sub>3</sub>): δ 7.52 (1H, ddd, *J* = 7.6, 1.4, 0.7 Hz), 7.45 (1H, dq, *J* = 8.2, 0.9 Hz), 7.30–7.24 (2H, m), 6.64 (1H, dd, *J* = 17.5, 11.2 Hz), 6.60 (1H, s), 5.96 (1H, ddd, *J* = 17.4, 1.3, 0.6 Hz), 5.41 (1H, dd, *J* = 11.2, 1.2 Hz).

***tert*-Butyl 5-vinyl-1H-indole-1-carboxylate (substrate for 2m):** The spectroscopic data match those reported previously.<sup>9</sup> <sup>1</sup>H NMR (400 MHz, CDCl<sub>3</sub>): δ 8.08 (1H, d, *J* = 8.0 Hz), 7.58–7.57 (2H, m), 7.41 (1H, dd, *J* = 8.4, 1.2 Hz), 6.81 (1H, dd, *J* = 17.6, 10.8 Hz), 6.55–6.54 (1H, m), 5.75 (1H, dd, *J* = 17.2, 1.2 Hz), 5.21 (1H, dd, *J* = 10.4, 0.8 Hz), 1.68 (9H, s).

The following olefins were synthesized from the corresponding aryl bromides by a two-step lithium halogen exchange/addition to TMSCl or *i*-PrOB(pin). To a flame-dried round bottom flask equipped

(6) Cho, S. J., Jensen, N. H., Kurome, T., Kadari, S., Manzano, M. L., Malberg, J. E., Caldarone, B., Roth, B. L. & Kozikowski, A. P. *J. Med. Chem.* **52**, 1885–1902 (2009).

(7) Paul, C. E., Rajagopalan, A., Lavandera, I., Gotor-Fernández, V., Kroutil, W. & Gotor V. *Chem. Commun.* **48**, 3303–3305 (2012).

(8) (a) Brewer, J. D. & Elix, J. A. *Aust. J. Chem.* **28**, 1059–1081 (1975). (b) Aitken, R. A. & Burns, G. *J. Chem. Soc., Perkin Trans. I*, 2455–2460 (1994).

(9) Molander, G. A. & Brown, A. R. *J. Org. Chem.* **71**, 9681–9686 (2006).

with a stir bar was added 4-bromostyrene (0.71 mL, 5.5 mmol) and thf (30 mL) under N<sub>2</sub>. The resulting solution was allowed to cool to -78 °C (dry ice/acetone) and *n*-butyllithium (1.6 M in hexanes, 3.8 mL, 6.0 mmol) was added dropwise into the solution through syringe. The resulting light yellow solution was allowed to stir for 1 h at -78 °C and then TMSCl (0.84 mL, 6.6 mmol) was added dropwise by syringe. The mixture was allowed to slowly warm up to 22 °C. After 16 h, the reaction was quenched by the addition of H<sub>2</sub>O (10 mL) and a saturated solution of aqueous NH<sub>4</sub>Cl (10 mL). The layers were separated and the aqueous layer was washed with Et<sub>2</sub>O (3 x 20 mL). The combined organic layers were dried over MgSO<sub>4</sub> and concentrated under reduced pressure. The resulting yellow oil was purified by silica gel chromatography (100% hexanes) to afford **trimethyl(4-vinylphenyl)silane** (substrate for **2ad**) as colorless oil (876 mg, 5.0 mmol, 91%): IR (neat): 3063 (w), 3008 (w), 2956 (m), 1629 (w), 1389 (m), 1248 (m), 1105 (m), 989 (m), 906 (m), 826 (s), 761 (m), 730 (m), 692 (m), 642 (m) cm<sup>-1</sup>; <sup>1</sup>H NMR (CDCl<sub>3</sub>, 400 MHz): δ 7.51 (2H, d, *J* = 7.6 Hz), 7.43 (2H, d, *J* = 8.0 Hz), 6.74 (1H, dd, *J* = 17.6, 10.9, Hz), 5.80 (1H, d, *J* = 17.6 Hz), 5.27 (1H, d, *J* = 10.9 Hz), 0.29 (9H, s); <sup>13</sup>C NMR (CDCl<sub>3</sub>, 100 MHz): δ 140.3, 138.1, 137.0, 133.7, 125.7, 114.2, -1.0; HRMS (DART): Calcd for C<sub>11</sub>H<sub>17</sub>Si [M+H]<sup>+</sup>: 177.1100, Found: 177.1101.

**4,4,5,5-Tetramethyl-2-(4-vinylphenyl)-1,3,2-dioxaborolane (substrate for 2j)**: Following the above procedure except *i*-PrOB(pin) was used instead of TMSCl, the product was obtained as colorless oil [purified by silica gel chromatography (hexanes:Et<sub>2</sub>O = 25:1)] (1.0 g, 4.5 mmol, 82%). IR (neat): 2978 (m), 2930 (w), 1629 (m), 1552 (w), 1397 (m), 1356 (s), 1322 (s), 1269 (m), 1213 (w), 1142 (s), 1088 (s), 1018 (m), 990 (m), 962 (m), 830 (m), 758 (w), 682 (m) cm<sup>-1</sup>; <sup>1</sup>H NMR (CDCl<sub>3</sub>, 400 MHz): δ 7.82 (2H, d, *J* = 8.0 Hz), 7.44 (2H, d, *J* = 8.0 Hz), 6.76 (1H, dd, *J* = 17.6, 10.8 Hz), 5.84 (1H, dd, *J* = 17.6, 1.2 Hz), 5.32 (1H, dd, *J* = 10.8, 0.8 Hz), 1.38 (12H, s); <sup>13</sup>C NMR (CDCl<sub>3</sub>, 100 MHz): δ 140.3, 137.0, 135.1, 125.6, 114.9, 83.8, 25.0, 24.9; HRMS (DART): Calcd for C<sub>14</sub>H<sub>20</sub>BO<sub>2</sub> [M+H]<sup>+</sup>: 231.1556; Found: 231.1563.

**4,4,5,5-Tetramethyl-2-(3-vinylphenyl)-1,3,2-dioxaborolane (substrate for 2f)**: Following the above except 3-bromostyrene and *i*-PrOB(pin) were used instead of 4-bromostyrene and TMSCl, respectively, the product was obtained as colorless oil [purified by silica gel chromatography (hexanes:Et<sub>2</sub>O = 25:1)] (1.1 g, 4.7 mmol, 85%). IR (neat): 2978 (w), 2929 (m), 1380 (m), 1353 (s), 1319 (s), 1141 (s), 1079 (s), 990 (m), 963 (m), 908 (m), 831 (m), 710 (w), 699 (s), 681 (m) cm<sup>-1</sup>; <sup>1</sup>H NMR (CDCl<sub>3</sub>, 400 MHz): δ 7.87 (1H, s), 7.73 (1H, d, *J* = 7.3 Hz), 7.53 (1H, dt, *J* = 7.8, 1.6 Hz), 7.35 (1H, t, *J* = 7.5 Hz), 6.75 (1H, dd, 17.6, 10.9 Hz), 5.81 (1H, dd, *J* = 17.6, 0.9 Hz), 5.26 (1H, dd, *J* = 10.9, 0.9 Hz), 1.37 (12H, s); <sup>13</sup>C NMR (CDCl<sub>3</sub>, 100 MHz): δ 137.0, 136.9, 134.3, 132.9, 129.0, 128.0, 114.0, 83.9, 25.0, 24.9; HRMS (DART): Calcd for C<sub>14</sub>H<sub>20</sub>BO<sub>2</sub> [M+H]<sup>+</sup>: 231.1556, Found: 231.1567.

**tert-Butyl 3-vinylbenzoate (substrate for 2g)**: Prepared according to the reported procedure.<sup>10</sup> IR (neat): 2978 (w), 2932 (w), 1711 (s), 1367 (m), 1294 (s), 1271 (m), 1256 (m), 1158 (s), 1113 (m), 1086 (m), 909 (m), 763 (s) cm<sup>-1</sup>; <sup>1</sup>H NMR (400 MHz, CDCl<sub>3</sub>): δ 8.03 (1H, dd, *J* = 2.2, 1.0 Hz), 7.88 (1H, dt,

(10) Miller, W. H., Seefeld, M. A., Newlander, K. A., Uzinskas, I. N., Burgess, W. J., Heerding, D. A., Yuan, C. C. K., Head, M. S., Payne, D. J., Rittenhouse, S. F., Moore, T. D., Pearson, S. C., Berry, V., DeWolf, Jr., W. E., Keller, P. M., Polizzi, B. J., Qiu, X., Janson, C. A. & Huffman, W. F. *J. Med. Chem.* **45**, 3246–3256 (2000).

$J = 7.6, 1.2$  Hz), 7.57–7.55 (1H, m), 7.37 (1H, t,  $J = 7.8$  Hz), 6.75 (1H, dd,  $J = 17.6, 10.8$  Hz), 5.82 (1H, dd,  $J = 17.6, 0.4$  Hz), 5.31 (1H, dd,  $J = 11.0, 0.6$  Hz), 1.61 (9H, s);  $^{13}\text{C}$  NMR (100 MHz,  $\text{CDCl}_3$ ):  $\delta$  165.8, 137.8, 136.2, 132.4, 130.1, 128.8, 128.5, 127.3, 115.0, 81.2, 28.3, ; HRMS (DART): Calcd for  $\text{C}_{13}\text{H}_{17}\text{O}_2$   $[\text{M}+\text{H}]^+$ : 205.1229, Found: 205.1235.

**tert-Butyl 4-vinylbenzoate (substrate for 2k):** Prepared according to the reported procedure.<sup>10</sup> The spectroscopic data match those reported previously.<sup>11</sup>  $^1\text{H}$  NMR (400 MHz,  $\text{CDCl}_3$ ):  $\delta$  7.94 (2H, d,  $J = 8.0$  Hz), 7.44 (2H, d,  $J = 8.0$  Hz), 6.75 (1H, dd,  $J = 17.6, 10.8$  Hz), 5.84 (1H, dd,  $J = 17.6, 1.2$  Hz), 5.36 (1H, dd,  $J = 11.0, 0.2$  Hz), 1.60 (9H, s).

**Preparation of allylic phosphates (substrates for 2n, 2p, and 2ak):** Allylic alcohols were synthesized from the corresponding alkenyl bromides (purchased from Aldrich and used as received) by a two-step lithium halogen exchange/addition to formaldehyde sequence.<sup>12</sup> Subsequently, allylic alcohols were converted to the corresponding allylic phosphates based on an established method.<sup>13</sup>

**Diethyl (2-phenylallyl) phosphate (substrates for 2n):** IR (neat): 2983 (w), 2908 (w), 1444 (w), 1262 (m), 1165 (w), 1016 (s), 975 (s), 778 (m), 707 (m)  $\text{cm}^{-1}$ ;  $^1\text{H}$  NMR (400 MHz,  $\text{CDCl}_3$ ):  $\delta$  7.43–7.46 (2H, m), 7.28–7.37 (3H, m), 5.57 (1H, s), 5.44 (1H, s), 4.93 (2H, d,  $J = 7.2$  Hz), 4.11–4.03 (4H, m), 1.31–1.28 (6H, m);  $^{13}\text{C}$  NMR (100 MHz,  $\text{CDCl}_3$ ):  $\delta$  142.9 (d,  $J = 7.5$  Hz), 137.7, 128.6, 128.2, 126.2, 115.4, 68.7 (d,  $J = 5.3$  Hz), 63.9 (d,  $J = 5.3$  Hz), 16.2 (d,  $J = 6.8$  Hz); HRMS (DART): Calcd for  $\text{C}_{13}\text{H}_{20}\text{O}_4\text{P}_1$   $[\text{M}+\text{H}]^+$ : 271.1099, Found: 271.1087.

**Diethyl (2-(trimethylsilyl)allyl) phosphate (substrate for 2p and 2ak):** IR (neat): 2982 (w), 2957 (w), 2908 (m), 1394 (w), 1250 (m), 1167 (w), 1024 (s), 976 (m), 840 (s)  $\text{cm}^{-1}$ ;  $^1\text{H}$  NMR (400 MHz,  $\text{CDCl}_3$ ):  $\delta$  5.85 (1H, s), 5.45 (1H, s), 4.65 (2H, d,  $J = 6.0$  Hz), 4.15–4.08 (4H, m), 1.33 (6H, t,  $J = 7.0$  Hz), 0.13 (9H, s);  $^{13}\text{C}$  NMR (100 MHz,  $\text{CDCl}_3$ ):  $\delta$  146.8 (d,  $J = 7.6$  Hz), 125.1, 70.7 (d,  $J = 6.0$  Hz), 63.9 (d,  $J = 6.1$  Hz), 16.3 (d,  $J = 6.9$  Hz), -1.5; HRMS (DART): Calcd for  $\text{C}_{10}\text{H}_{24}\text{O}_4\text{P}_1\text{Si}_1$   $[\text{M}+\text{H}]^+$ : 267.1182, Found: 267.1177.

**Preparation of an allylic phosphate for 2o:** 2-Methyl-2-propen-1-ol (purchased from Aldrich and used as received) was converted to the corresponding allylic phosphate based on a previously disclosed method.<sup>13</sup>

**Diethyl (2-methylallyl) phosphate (substrate for 2o):** IR (neat): 2983 (w), 2911 (w), 1447 (w), 1264 (m), 1166 (w), 1008 (s), 973 (s)  $\text{cm}^{-1}$ ;  $^1\text{H}$  NMR (400 MHz,  $\text{CDCl}_3$ ):  $\delta$  4.94 (1H, s), 4.83 (1H, s), 4.32 (2H, d,  $J = 7.2$  Hz), 4.05–3.98 (4H, m), 1.67 (3H, s), 1.26–1.21 (6H, m);  $^{13}\text{C}$  NMR (100 MHz,  $\text{CDCl}_3$ ):  $\delta$  140.0 (d,  $J = 6.8$  Hz), 113.0, 70.5 (d,  $J = 6.1$  Hz), 63.7 (d,  $J = 6.1$  Hz), 18.9, 16.0 (d,  $J = 6.8$  Hz); HRMS (DART): Calcd for  $\text{C}_8\text{H}_{18}\text{O}_4\text{P}_1$   $[\text{M}+\text{H}]^+$ : 209.0943, Found: 209.0944.

(11) Mäsing, F., Mardyukov, A., Doerenkamp, C., Eckert, H., Malkus, U., Nüsse, H., Klingauf, J. & Studer, A. *Angew. Chem. Int. Edn* **54**, 12612–12617 (2015).

(12) Amat, M., Arioli, F., Pérez, M., Molins, E. & Bosch, J. *Org. Lett.* **15**, 2470–2473 (2013).

(13) Kacprzyński, M. A., May, T. L., Kazane, S. A. & Hoveyda, A. H. *Angew. Chem. Int. Ed.* **46**, 4554–4558 (2007).



**Preparation of allyl-1,1- $d_2$ -diethyl phosphate (1a- $d_2$ ):** Allylic alcohol was synthesized from the reported procedure.<sup>14</sup> Subsequently, allylic alcohol was converted to the corresponding allylic phosphates based on an established method.<sup>13</sup> IR (neat): 2984 (w), 2934 (w), 1265 (m), 1017(s), 976 (s), 801 (m)  $\text{cm}^{-1}$ ;  $^1\text{H}$  NMR (400 MHz,  $\text{CDCl}_3$ ):  $\delta$  5.91 (1H, dd,  $J = 17.2, 10.4$  Hz), 5.33 (1H, dt,  $J = 17.2, 1.5$  Hz), 5.21 (1H, dt,  $J = 10.0, 1.4$  Hz), 4.12–4.04 (4H, m), 1.32–1.28 (6H, m);  $^{13}\text{C}$  NMR (100 MHz,  $\text{CDCl}_3$ ):  $\delta$  135.6 (d,  $J = 6.8$  Hz), 118.3, 63.8 (d,  $J = 6.1$  Hz), 16.2 (d,  $J = 6.8$  Hz); HRMS (DART): Calcd for  $\text{C}_7\text{H}_{14}\text{D}_2\text{O}_4\text{P}_1$   $[\text{M}+\text{H}]^+$ : 197.0912, Found: 197.0920.

---

(14) Schuetz, R. D. & Millard, F. W. *J. Org. Chem.* **24**, 297–300 (1959).

## 4. Examination of Different Types of Chiral Cu Complexes

Table 1 | Examination of different types of Cu complexes

**NHC-1**

**NHC-2**

**NHC-3**

**NHC-4** R = H, **NHC-5** R = *t*-Bu

**NHC-6**

**NHC-7**

**L1**

**L2**

Ar = 4-OMe-3,5-*t*-BuC<sub>6</sub>H<sub>3</sub>

**L3c**

Ar = 3,5-(Me)<sub>2</sub>C<sub>6</sub>H<sub>3</sub>

**L4**

Ar = 3,5-*t*-BuC<sub>6</sub>H<sub>3</sub>

**L5**

**L6**

| Entry | Ligand       | Conv. (%)§ | Yield (%)§§            | e.r.† |
|-------|--------------|------------|------------------------|-------|
| 1     | <b>NHC-1</b> | 94         | 41                     | 56:44 |
| 2     | <b>NHC-2</b> | 40         | 25                     | 58:42 |
| 3     | <b>NHC-3</b> | >98        | 78                     | 56:44 |
| 4     | <b>NHC-4</b> | 80         | 71                     | 61:39 |
| 5     | <b>NHC-5</b> | 35         | 25                     | 17:83 |
| 6     | <b>NHC-6</b> | 44         | <2 [only allyl-B(pin)] | NA    |
| 7     | <b>NHC-7</b> | >98        | <2 [only allyl-B(pin)] | NA    |
| 8     | <b>L1</b>    | 15         | 6                      | 9:91  |
| 9     | <b>L2</b>    | 66         | <2 [only allyl-B(pin)] | NA    |
| 8     | <b>L3c</b>   | >98        | 62                     | 20:80 |
| 9     | <b>L4</b>    | 86         | 11                     | 51:49 |
| 10    | <b>L5</b>    | 39         | 11                     | 55:45 |
| 11    | <b>L6</b>    | >98        | 22                     | 55:45 |

Reactions were carried out under N<sub>2</sub> atm.; see the Supplementary Information for details.

§ Conversion (conv.) was based on the disappearance of the limiting reagent (**1a**) and determined by analysis of the <sup>1</sup>H NMR spectra of the unpurified mixtures; the variance of values is estimated to be <±2%.

§§ Yield of isolated and purified product; the variance of values is estimated to be <±5%.

†Enantiomeric ratios were determined by HPLC analysis; the variance of values is estimated to be <±1%. See the Supplementary Information for details. Abbreviation: NA, not applicable.

## 5. Representative Procedure for the Catalytic Enantioselective Boron-Allyl Addition to Aryl Alkenes

In an N<sub>2</sub>-filled glove box, an oven-dried 1 dram vial equipped with a stir bar was charged with bisphosphine **L3a** (3.4 mg, 0.0055 mmol), NaO*t*-Bu (14 mg, 0.15 mmol), and CuCl (0.50 mg, 0.0050 mmol), and thf (1.0 mL). The mixture was allowed to stir for 1 h under N<sub>2</sub> at 22 °C; during this time the solution turned light yellow. Bis(pinacolato)diboron (28 mg, 0.11 mmol) was added to the mixture, causing the solution to turn dark brown immediately. Styrene (31 mg, 0.30 mmol), allylphosphate (**1a**) (19 mg, 0.10 mmol), and thf (0.50 mL) were added. The vial was sealed with a cap and electrical tape before removal from the glove box. The resulting mixture was allowed to stir at 22 °C for 14 h. The mixture was then passed through a short plug of silica gel (4 x 1 cm) and eluted with Et<sub>2</sub>O. The organic layer was concentrated under reduced pressure, affording yellow oil, which was purified by silica gel chromatography (100% hexanes→hexanes:Et<sub>2</sub>O = 10:1) to afford **2a** as colorless oil (18 mg, 0.067 mmol, 67% yield). **(R)-4,4,5,5-Tetramethyl-2-(2-phenylpent-4-en-1-yl)-1,3,2-dioxaborolane (2a)**: 44% yield was obtained with 3:1 alkene:carbonate (**1e**). IR (neat): 3027 (w), 2977 (m), 2925 (w), 1452 (m), 1367 (s), 1319 (s), 1270 (w), 12134(w), 1164 (m), 1143 (s), 968 (m), 911 (m), 847 (m), 756 (m), 699 (s) cm<sup>-1</sup>; <sup>1</sup>H NMR (CDCl<sub>3</sub>, 400 MHz): δ 7.25–7.09 (5H, m), 5.68 (1H, ddt, *J* = 17.2, 10.0, 7.2 Hz), 4.96–4.88 (2H, m), 2.96–2.88 (1H, m), 2.40–2.27 (2H, m), 1.23 (1H, dd, *J* = 15.4, 6.6 Hz), 1.14–1.08 (1H, m), 1.10 (6H, s), 1.09 (6H, s); <sup>13</sup>C NMR (CDCl<sub>3</sub>, 100 MHz): δ 146.9, 137.3, 128.2, 127.6, 126.0, 116.1, 83.1, 43.9, 41.5, 24.83, 24.78; HRMS (DART): Calcd for C<sub>17</sub>H<sub>26</sub>B<sub>1</sub>O<sub>2</sub>[M+H]<sup>+</sup>: 273.2026, Found: 273.2015. Specific rotation: [α]<sub>D</sub><sup>20</sup> +6.7 (*c* 0.30, CHCl<sub>3</sub>) for an enantiomerically enriched sample of 95:5 e.r. Enantiomeric purity was determined by HPLC analysis in comparison with authentic racemic material (95:5 e.r. shown; Chiralcel OD–H column, 100% hexanes, 0.3 mL/min, 220 nm).

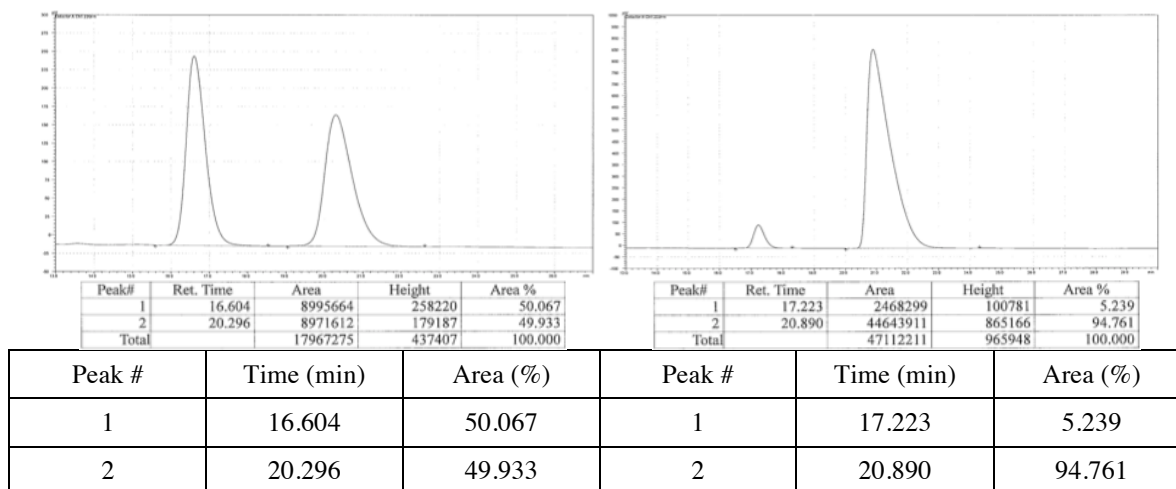

**(R)-2-(2-(2-Methoxyphenyl)pent-4-enyl)-4,4,5,5-tetramethyl-1,3,2-dioxaborolane (2b)**: IR (neat): 2976 (w), 2929 (w), 2836 (w), 1599 (w), 1585 (w), 1491 (m), 1464 (w), 1438 (w), 1368 (s), 1318 (s), 1215 (s), 1143 (s), 1101 (s), 1031 (m), 968 (m), 909 (m), 885 (w), 749 (s) cm<sup>-1</sup>; <sup>1</sup>H NMR (CDCl<sub>3</sub>, 400 MHz): δ 7.17–7.10 (2H, m), 6.88 (1H, t, *J* = 7.4 Hz), 6.81 (1H, d, *J* = 8.4 Hz), 5.75–5.65 (1H, m), 4.96–4.88 (2H, m), 3.81 (3H, s), 3.42 (1H, app pent, *J* = 7.5 Hz), 2.44–2.26 (2H, m), 1.26–1.19 (1H,

m), 1.16–1.08 (1H, m), 1.11 (6H, s), 1.08 (6H, s);  $^{13}\text{C}$  NMR ( $\text{CDCl}_3$ , 100 MHz):  $\delta$  157.2, 137.8, 135.1, 127.8, 126.7, 120.4, 115.7, 110.6, 82.9, 55.5, 42.3, 33.9, 24.80, 24.77; HRMS (DART): Calcd for  $\text{C}_{18}\text{H}_{28}\text{B}_1\text{O}_3$   $[\text{M}+\text{H}]^+$ : 303.2132, Found: 303.2128; Specific Rotation:  $[\alpha]_{\text{D}}^{20} +13.9$  ( $c$  1.61,  $\text{CHCl}_3$ ) for an enantiomerically enriched sample of 95:5 e.r. Enantiomeric purity was determined by HPLC analysis in comparison with authentic racemic material (95:5 e.r. shown; Chiralcel OZ–H column, 100% hexanes, 0.3 mL/min, 220 nm).

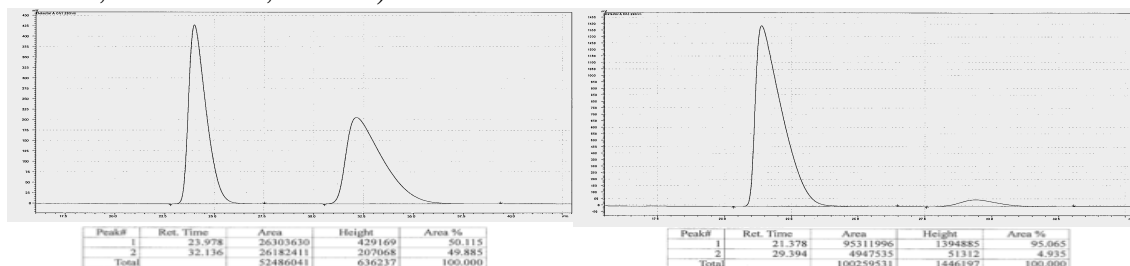

| Peak # | Time (min) | Area (%) | Peak # | Time (min) | Area (%) |
|--------|------------|----------|--------|------------|----------|
| 1      | 23.978     | 50.115   | 1      | 21.378     | 95.065   |
| 2      | 32.136     | 49.885   | 2      | 29.394     | 4.935    |

**(R)-2-(2-(2-Fluorophenyl)pent-4-en-1-yl)-4,4,5,5-tetramethyl-1,3,2-dioxaborolane (2c):** Following the representative procedure except **1e** was used. IR (neat): 2978 (w), 2931 (w), 1765 (s), 1490 (m), 1401 (s), 1369 (s), 1223 (m), 1144 (s), 968 (m), 913 (m), 846 (m), 754 (s)  $\text{cm}^{-1}$ ;  $^1\text{H}$  NMR (400 MHz,  $\text{CDCl}_3$ ):  $\delta$  7.21 (1H, td,  $J = 7.6, 1.6$  Hz), 7.13–7.10 (1H, m), 7.09–7.02 (1H, m), 6.98–6.94 (1H, m), 5.68 (1H, ddt,  $J = 16.8, 10.4, 6.8$  Hz), 4.97–4.90 (2H, m), 3.35–3.27 (1H, m), 2.43–2.32 (2H, m), 1.28–1.22 (1H, m), 1.19–1.08 (1H, m), 1.11 (6H, s), 1.08 (6H, s);  $^{13}\text{C}$  NMR (100 MHz,  $\text{CDCl}_3$ ):  $\delta$  160.9 (d,  $J = 243.7$  Hz), 136.9, 133.5 (d,  $J = 14.4$  Hz), 128.8 (d,  $J = 5.3$  Hz), 127.3 (d,  $J = 8.4$  Hz), 123.9 (d,  $J = 3.8$  Hz), 116.4, 115.3 (d,  $J = 22.8$  Hz), 83.1, 42.5, 34.3, 24.8, 24.7; HRMS (DART): Calcd for  $\text{C}_{17}\text{H}_{25}\text{B}_1\text{F}_1\text{O}_2$   $[\text{M}+\text{H}]^+$ : 291.1932, Found: 291.1937; Specific Rotation:  $[\alpha]_{\text{D}}^{20} +14.2$  ( $c$  0.87,  $\text{CHCl}_3$ ) for an enantiomerically enriched sample of 96:4 e.r. Enantiomeric purity was determined by HPLC analysis in comparison with authentic racemic material (96:4 e.r. shown; Chiralcel OD–H column, 100% hexanes, 0.3 mL/min, 220 nm).

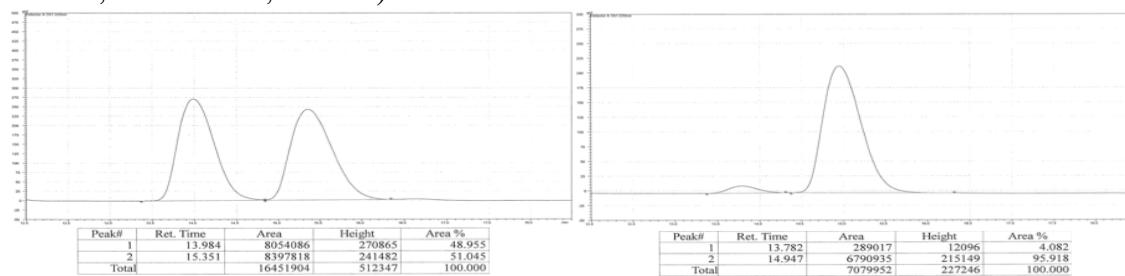

| Peak # | Time (min) | Area (%) | Peak # | Time (min) | Area (%) |
|--------|------------|----------|--------|------------|----------|
| 1      | 13.984     | 48.955   | 1      | 13.782     | 4.082    |
| 2      | 15.351     | 51.045   | 2      | 14.947     | 95.918   |

**(R)-4,4,5,5-Tetramethyl-2-(2-(2-(trifluoromethyl)phenyl)pent-4-en-1-yl)-1,3,2-dioxaborolane (2d):**

Following the representative procedure except for 1:3 (0.1 mmol: 0.3 mmol) alkene:carbonate (**1e**) used. IR (neat): 2979 (w), 2928 (w), 1363 (m), 1312 (s), 1145 (s), 1124 (s), 1036 (m), 768 (m)  $\text{cm}^{-1}$ ;  $^1\text{H}$  NMR (400 MHz,  $\text{CDCl}_3$ ):  $\delta$  7.58 (1H, d,  $J = 8.0$  Hz), 7.50–7.43 (2H, m), 7.26–7.22 (1H, m), 5.70 (1H, ddt,  $J = 18.0, 10.0, 7.2$  Hz), 4.99–4.92 (2H, m), 3.42 (1H, app pent,  $J = 7.4$  Hz), 2.45–2.25 (2H, m), 1.26 (1H, dd,  $J = 15.4, 7.0$  Hz), 1.14 (1H, dd,  $J = 15.6, 8.4$  Hz), 1.08 (6H, s), 1.05 (6H, s);  $^{13}\text{C}$  NMR (100 MHz,  $\text{CDCl}_3$ ):  $\delta$  146.5, 136.7, 131.8, 128.2 (q,  $J = 29.0$  Hz), 128.18, 125.7, 125.6, 124.7 (q,  $J = 272.5$  Hz), 116.6, 83.1, 43.9, 36.0, 24.7, 18.6 (br, C–B); HRMS (DART): Calcd for  $\text{C}_{18}\text{H}_{25}\text{B}_1\text{F}_3\text{O}_2$   $[\text{M}+\text{H}]^+$ : 341.1900, Found: 341.1903; Specific Rotation:  $[\alpha]_{\text{D}}^{20} +11.9$  ( $c$  1.20,  $\text{CHCl}_3$ ) for an enantiomerically enriched sample of 88:12 e.r. Enantiomeric purity was determined by HPLC analysis in comparison with authentic racemic material (96:4 e.r. shown; Chiralcel OZ–H column, 100% hexanes, 0.3 mL/min, 220 nm).

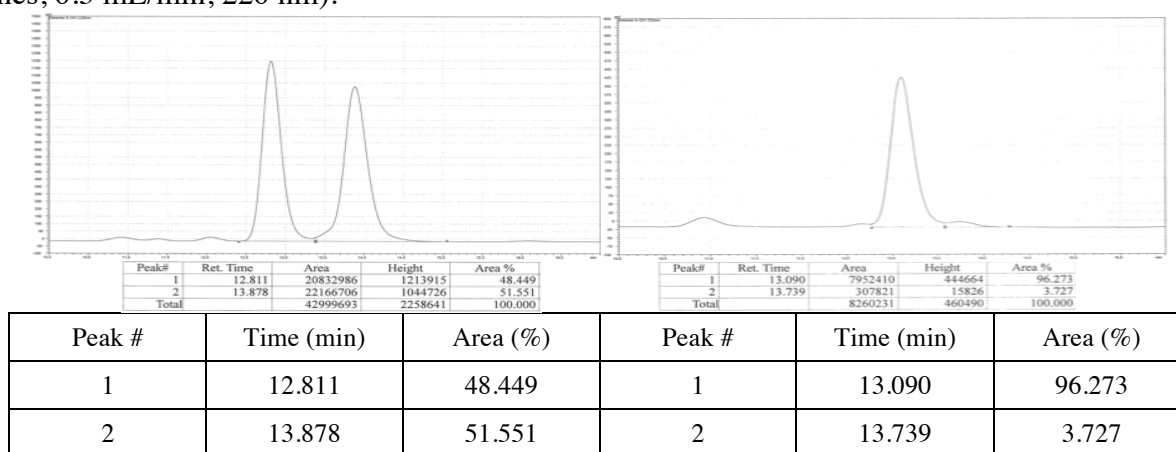**(R)-4,4,5,5-Tetramethyl-2-(2-(naphthalen-2-yl)pent-4-en-1-yl)-1,3,2-dioxaborolane (2e):**

Following the representative procedure except for 1:3 (0.1 mmol: 0.3 mmol) alkene:phosphate used. IR (neat): 2976 (w), 2923 (s), 2853 (m), 1639 (w), 1362 (s), 1315 (s), 1143 (s), 968 (m), 911 (m), 847 (s), 814 (s), 744 (s), 476 (s)  $\text{cm}^{-1}$ ;  $^1\text{H}$  NMR ( $\text{CDCl}_3$ , 400 MHz):  $\delta$  7.81–7.73 (3H, m), 7.65–7.62 (1H, m), 7.46–7.35 (3H, m), 5.76–5.64 (1H, m), 5.01–4.89 (2H, m), 3.19–3.08 (1H, m), 2.55–2.37 (2H, m), 1.28–1.17 (2H, m), 1.06 (6H, s), 1.07 (6H, s);  $^{13}\text{C}$  NMR ( $\text{CDCl}_3$ , 100 MHz):  $\delta$  144.5, 137.2, 133.6, 132.3, 127.82, 127.78, 127.74, 127.68, 126.3, 125.81, 125.79, 125.1, 116.3, 83.1, 43.6, 41.6, 24.85, 24.77; HRMS (DART): Calcd for  $\text{C}_{21}\text{H}_{28}\text{B}_1\text{O}_2$   $[\text{M}+\text{H}]^+$ : 323.2182, Found: 323.2194; Specific Rotation:  $[\alpha]_{\text{D}}^{20} +16.4$  ( $c$  0.72,  $\text{CHCl}_3$ ) for an enantiomerically enriched sample of 96:4 e.r. Enantiomeric purity was determined by HPLC analysis in comparison with authentic racemic material (96:4 e.r. shown; Chiralcel OZ–H column, 100% hexanes, 0.3 mL/min, 254 nm).

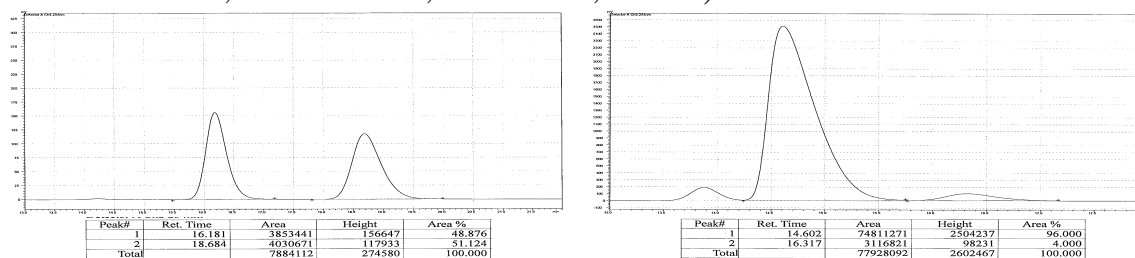

| Peak # | Time (min) | Area (%) | Peak # | Time (min) | Area (%) |
|--------|------------|----------|--------|------------|----------|
| 1      | 16.181     | 48.876   | 1      | 14.602     | 96.000   |
| 2      | 18.684     | 51.124   | 2      | 16.317     | 4.000    |

**(R)-4,4,5,5-Tetramethyl-2-(3-(1-(4,4,5,5-tetramethyl-1,3,2-dioxaborolan-2-yl)pent-4-en-2-yl)phenyl)-1,3,2-dioxaborolane (2f):** Following the representative procedure except for 1:3 (0.1 mmol: 0.3 mmol) alkene:phosphate used. IR (neat): 2977 (m), 2926 (w), 2035 (w), 1611 (w), 1457 (w), 1399 (m), 1360 (s), 1320 (m), 1271 (w), 1214 (w), 1144 (s), 1090 (m), 964 (w), 860 (w), 829 (w), 659 (w)  $\text{cm}^{-1}$ ;  $^1\text{H}$  NMR ( $\text{CDCl}_3$ , 400 MHz):  $\delta$  7.66 (1H, s), 7.60 (1H, d,  $J = 7.1$  Hz), 7.34–7.23 (2H, m), 5.68 (1H, ddt,  $J = 17.1, 10.1, 7.0$  Hz), 4.97 (1H, dd,  $J = 17.2, 1.9$  Hz), 4.94–4.89 (1H, m), 3.03–2.91 (1H, m), 2.49–2.29 (2H, m), 1.34 (6H, s), 1.33 (6H, s), 1.27–1.17 (2H, m), 1.10 (12H, s);  $^{13}\text{C}$  NMR ( $\text{CDCl}_3$ , 100 MHz):  $\delta$  146.2, 137.5, 134.2, 132.5, 130.3, 127.6, 116.0, 83.7, 83.0, 43.3, 41.4, 25.0, 24.9, 24.8; HRMS (DART): Calcd for  $\text{C}_{23}\text{H}_{37}\text{B}_2\text{O}_4$   $[\text{M}+\text{H}]^+$ : 399.2878, Found: 399.2887; Specific rotation:  $[\alpha]_{\text{D}}^{20} +5.8$  ( $c$  0.43,  $\text{CHCl}_3$ ) for an enantiomerically enriched sample of 96.5:3.5 e.r. Enantiomeric purity was determined by HPLC analysis in comparison with authentic racemic material (96.5:3.5 e.r. shown; Chiralcel OD–H column, 98% hexanes, 2% *i*-PrOH, 0.3 mL/min, 220 nm).

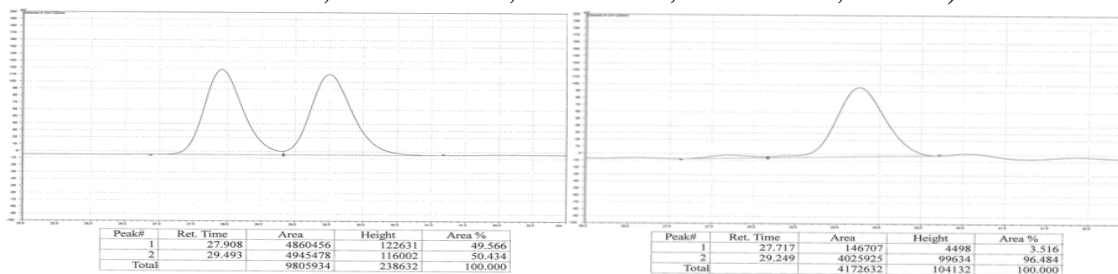

| Peak # | Time (min) | Area (%) | Peak # | Time (min) | Area (%) |
|--------|------------|----------|--------|------------|----------|
| 1      | 27.908     | 49.566   | 1      | 27.717     | 3.516    |
| 2      | 29.493     | 50.434   | 2      | 29.249     | 96.484   |

**tert-Butyl (R)-3-(1-(4,4,5,5-tetramethyl-1,3,2-dioxaborolan-2-yl)pent-4-en-2-yl)benzoate (2g):** Following the representative procedure except for 1:3 (0.1 mmol: 0.3 mmol) alkene:phosphate used. IR (neat): 2977 (w), 2929 (w), 1713 (s), 1440 (w), 1390 (w), 1367 (s), 1320 (m), 1294 (s), 1161 (s), 1144 (s), 1110 (m)  $\text{cm}^{-1}$ ;  $^1\text{H}$  NMR (400 MHz,  $\text{CDCl}_3$ ):  $\delta$  7.83 (1H, dd,  $J = 1.6, 1.2$  Hz), 7.78 (1H, ddd,  $J = 7.7, 2.3, 1.1$  Hz), 7.37 (1H, dd,  $J = 7.6, 1.6$  Hz), 7.30 (1H, t,  $J = 7.4$  Hz), 5.66 (1H, ddt,  $J = 17.2, 10.0, 7.2$  Hz), 4.98–4.91 (2H, m), 3.04–2.96 (1H, m), 2.44–2.32 (2H, m), 1.59 (9H, s), 1.25 (1H, dd,  $J = 15.8, 7.0$  Hz), 1.20–1.06 (13H, m);  $^{13}\text{C}$  NMR (100 MHz,  $\text{CDCl}_3$ ):  $\delta$  166.2, 147.1, 137.0, 131.9, 131.6, 128.8, 128.1, 127.2, 116.5, 83.2, 80.9, 43.4, 41.4, 28.4, 24.9, 24.8; HRMS (DART): Calcd for  $\text{C}_{22}\text{H}_{34}\text{B}_1\text{O}_4$   $[\text{M}+\text{H}]^+$ : 373.2550, Found: 373.2565; Specific Rotation:  $[\alpha]_{\text{D}}^{20} +4.9$  ( $c$  1.05,  $\text{CHCl}_3$ ) for an enantiomerically enriched sample of 95:5 e.r. Enantiomeric purity was determined by HPLC analysis in comparison with authentic racemic material (95:5 e.r. shown; Chiralcel OZ–H column, 100% hexanes, 0.3 mL/min, 220 nm).

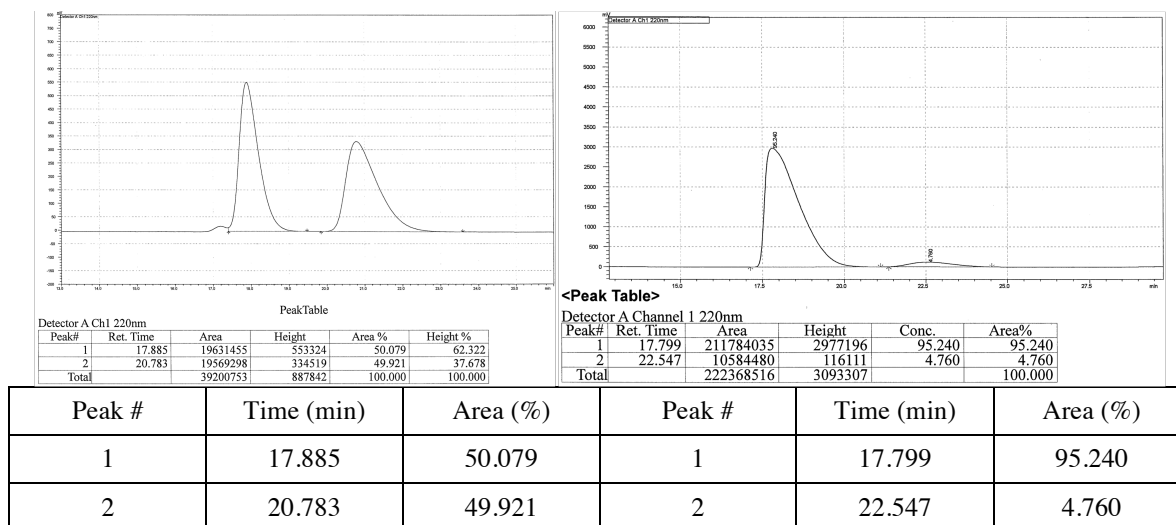

**tert-Butyl (R)-3-(1-(4,4,5,5-tetramethyl-1,3,2-dioxaborolan-2-yl)pent-4-en-2-yl-5,5-d<sub>2</sub>)benzoate [2g-d<sub>2</sub> (S<sub>N</sub>2')]:** Following the representative procedure except **1b-d<sub>2</sub>** and **L3b** was used. IR (neat): 2977 (w), 2929 (w), 1713 (s), 1367 (s), 1320 (m), 1295 (s), 1162 (s), 1145 (s), 1111 (m), 968 (m), 848 (m) cm<sup>-1</sup>; <sup>1</sup>H NMR (400 MHz, CDCl<sub>3</sub>): δ 7.83 (1H, t, *J* = 1.6 Hz), 7.78 (1H, dt, *J* = 7.6, 1.6 Hz), 7.37 (1H, dt, *J* = 7.2, 1.6 Hz), 7.30 (1H, t, *J* = 7.8 Hz), 5.65 (1H, t, *J* = 7.0 Hz), 3.04–2.96 (1H, m), 2.44–2.32 (2H, m), 1.59 (9H, s), 1.25 (1H, dd, *J* = 15.2, 6.0 Hz) 1.11 (6H, s), 1.10 (6H, s), 1.12–1.06 (1H, m); <sup>13</sup>C NMR (100 MHz, CDCl<sub>3</sub>): δ 166.2, 147.1, 136.8, 131.9, 131.6, 128.8, 128.1, 127.2, 83.2, 80.9, 43.3, 41.4, 28.4, 24.9, 24.8; HRMS (DART): Calcd for C<sub>22</sub>H<sub>35</sub>D<sub>2</sub>B<sub>1</sub>N<sub>1</sub>O<sub>4</sub> [M+NH<sub>4</sub>]<sup>+</sup>: 392.2941, Found: 392.2954.

**(R)-2-(2-(4-Methoxyphenyl)pent-4-enyl)-4,4,5,5-tetramethyl-1,3,2-dioxaborolane (2h):** 40% yield was obtained with 6:1 (0.6 mmol: 0.1 mmol) alkene:phosphate. IR (neat): 2976 (w), 2926 (w), 2834 (w), 1610 (w), 1511 (s), 1366 (s), 1319 (m), 1244 (s), 1214 (w), 1177 (m), 1165 (s), 1143 (w), 1104 (m), 1037 (m), 967 (m), 910 (w), 885 (w), 846 (m), 828 (m), 806 (w) cm<sup>-1</sup>; <sup>1</sup>H NMR (CDCl<sub>3</sub>, 400 MHz): δ 7.12 (2H, dd, *J* = 6.4, 2.0 Hz), 6.80 (2H, dd, *J* = 6.4, 2.0 Hz), 5.67 (1H, ddt, *J* = 17.2, 9.6, 7.2 Hz), 4.97–4.90 (2H, m) 3.77 (3H, s), 2.94–2.86 (1H, m), 2.38–2.26 (2H, m), 1.25–1.18 (1H, m), 1.11–1.04 (13H, m). <sup>13</sup>C NMR (CDCl<sub>3</sub>, 100 MHz): δ 157.9, 139.1, 137.4, 128.4, 116.0, 113.6, 83.1, 55.4, 44.1, 40.7, 24.9, 24.8; HRMS (DART): Calcd for C<sub>18</sub>H<sub>28</sub>BO<sub>3</sub> [M+H]<sup>+</sup>: 303.2132, Found: 303.2126; Specific Rotation: [α]<sub>D</sub><sup>20</sup> +9.8 (c 0.76, CHCl<sub>3</sub>) for an enantiomerically enriched sample of 97:3 e.r. Enantiomeric purity was determined by HPLC analysis in comparison with authentic racemic material (97:3 e.r. shown; Chiralcel OD–H column, 100% hexanes, 0.3 mL/min, 220 nm).

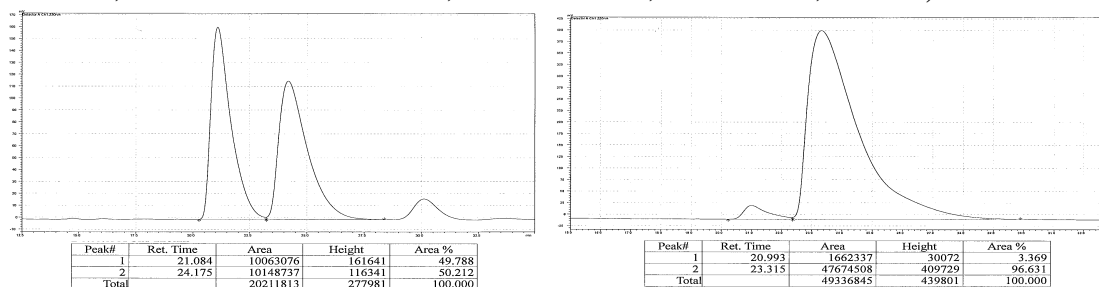

| Peak # | Time (min) | Area (%) | Peak # | Time (min) | Area (%) |
|--------|------------|----------|--------|------------|----------|
| 1      | 21.084     | 49.788   | 1      | 20.993     | 3.369    |
| 2      | 24.175     | 50.212   | 2      | 23.315     | 96.631   |

**(R)-2-(2-(4-Fluorophenyl)pent-4-en-1-yl)-4,4,5,5-tetramethyl-1,3,2-dioxaborolane (2i):** Following the representative procedure except **1e** was used. IR (neat): 2978 (w), 2925 (w), 2855 (w), 1604 (w), 1509 (s), 1369 (s), 1322 (m), 1223 (m), 1144 (s), 968 (w), 912 (w), 832 (m)  $\text{cm}^{-1}$ ;  $^1\text{H}$  NMR (400 MHz,  $\text{CDCl}_3$ ):  $\delta$  7.17–7.13 (2H, m), 6.98–6.91 (2H, m), 5.65 (1H, ddt,  $J = 17.2, 10.0, 7.2$  Hz), 4.96–4.91 (2H, m), 2.97–2.89 (1H, m), 2.36–2.27 (2H, m), 1.26–1.16 (1H, m), 1.09–1.04 (13H, m);  $^{13}\text{C}$  NMR (100 MHz,  $\text{CDCl}_3$ ):  $\delta$  161.4 (d,  $J = 241.3$  Hz), 142.5 (d,  $J = 3.0$  Hz), 137.0, 128.9 (d,  $J = 7.6$  Hz), 116.4, 114.9 (d,  $J = 20.5$  Hz), 83.2, 44.0, 40.8, 24.8, 24.7; HRMS (DART): Calcd for  $\text{C}_{17}\text{H}_{25}\text{B}_1\text{F}_1\text{O}_2$   $[\text{M}+\text{H}]^+$ : 291.1932, Found: 291.1939; Specific Rotation:  $[\alpha]_{\text{D}}^{20} +14.9$  ( $c$  1.20,  $\text{CHCl}_3$ ) for an enantiomerically enriched sample of 92:8 e.r. Enantiomeric purity was determined by HPLC analysis in comparison with authentic racemic material (98:2 e.r. shown; Chiralcel OZ–H column, 100% hexanes, 0.3 mL/min, 220 nm).

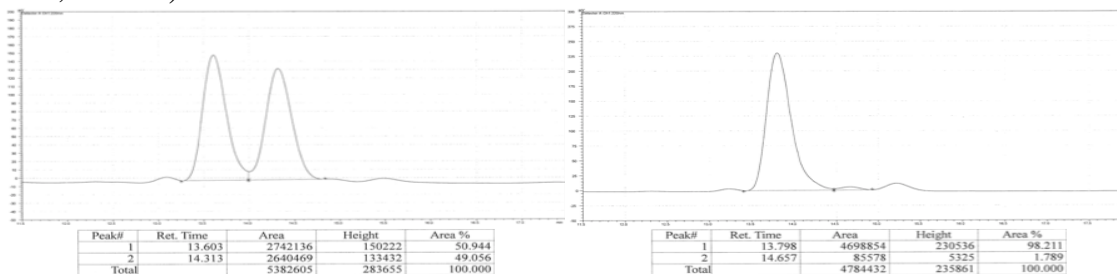

| Peak # | Time (min) | Area (%) | Peak # | Time (min) | Area (%) |
|--------|------------|----------|--------|------------|----------|
| 1      | 13.603     | 50.944   | 1      | 13.798     | 98.211   |
| 2      | 14.313     | 49.056   | 2      | 14.657     | 1.789    |

**(R)-4,4,5,5-Tetramethyl-2-(4-(1-(4,4,5,5-tetramethyl-1,3,2-dioxaborolan-2-yl)pent-4-en-2-yl)phenyl)-1,3,2-dioxaborolane (2j):** Following the representative procedure except for 1:3 (0.1 mmol: 0.3 mmol) alkene:phosphate used. IR (neat): 2977 (m), 2925 (m), 2041 (w), 2034 (w), 2024 (w), 1611 (m), 1399 (m), 1360 (s), 1319 (m), 1271 (w), 1144 (m), 1090 (s), 964 (w), 860 (w), 830 (w), 660 (m)  $\text{cm}^{-1}$ ;  $^1\text{H}$  NMR ( $\text{CDCl}_3$ , 400 MHz):  $\delta$  7.70 (2H, d,  $J = 8.0$  Hz), 7.21 (2H, d,  $J = 8.0$  Hz), 5.73–5.57 (1H, m), 4.97–4.88 (2H, m), 3.01–2.90 (1H, m), 2.43–2.28 (2H, m), 1.33 (12H, s), 1.28–1.16 (2H, m), 1.12 (6H, s), 1.11 (6H, s);  $^{13}\text{C}$  NMR ( $\text{CDCl}_3$ , 100 MHz):  $\delta$  150.4, 137.2, 134.8, 127.0, 116.2, 83.6, 83.1, 43.5, 41.6, 25.0, 24.8; HRMS (DART): Calcd for  $\text{C}_{23}\text{H}_{40}\text{B}_2\text{N}_1\text{O}_4$   $[\text{M}+\text{NH}_4]^+$ : 416.3143, Found: 416.3158; Specific Rotation:  $[\alpha]_{\text{D}}^{20} +9.1$  ( $c$  1.02,  $\text{CHCl}_3$ ) for an enantiomerically enriched sample of 92:8 e.r. Enantiomeric purity was determined by HPLC analysis in comparison with authentic racemic material (92:8 e.r. shown; Chiralcel AZ–H column, 99% hexanes, 1% *i*-PrOH, 0.3 mL/min, 220 nm).



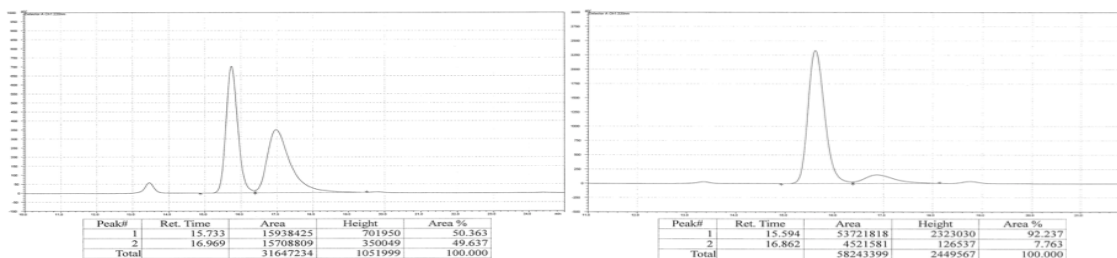

| Peak # | Time (min) | Area (%) | Peak # | Time (min) | Area (%) |
|--------|------------|----------|--------|------------|----------|
| 1      | 15.733     | 50.363   | 1      | 15.594     | 92.237   |
| 2      | 16.969     | 49.637   | 2      | 16.862     | 7.763    |

**tert-Butyl (R)-4-(1-(4,4,5,5-tetramethyl-1,3,2-dioxaborolan-2-yl)pent-4-en-2-yl)benzoate (2k):** IR (neat): 2978 (m), 2930 (w), 1712 (s), 1609 (w), 1367 (s), 1312 (m), 1290 (s), 1166 (s), 1145 (s), 1116 (s), 848 (m)  $\text{cm}^{-1}$ ;  $^1\text{H}$  NMR (400 MHz,  $\text{CDCl}_3$ ):  $\delta$  7.88 (2H, d,  $J = 8.0$  Hz), 7.24 (2H, d,  $J = 8.0$  Hz), 5.68–5.58 (1H, m), 4.96–4.90 (2H, m), 3.00 (1H, app pent,  $J = 7.5$  Hz), 2.35 (2H, t,  $J = 7.2$  Hz), 1.58 (9H, s), 1.27–1.21 (1H, m), 1.14–1.08, (1H, m) 1.12 (6H, s), 1.11 (6H, s);  $^{13}\text{C}$  NMR (100 MHz,  $\text{CDCl}_3$ ):  $\delta$  166.1, 152.0, 136.8, 129.9, 129.5, 127.4, 116.5, 83.2, 80.8, 43.5, 41.5, 28.4, 24.9, 24.8; HRMS (DART): Calcd for  $\text{C}_{22}\text{H}_{34}\text{B}_1\text{O}_4$   $[\text{M}+\text{H}]^+$ : 373.2550, Found: 373.2534; Specific Rotation:  $[\alpha]_{\text{D}}^{20} - 3.0$  ( $c$  1.00,  $\text{CHCl}_3$ ) for an enantiomerically enriched sample of 67:33 e.r. Enantiomeric purity was determined by HPLC analysis in comparison with authentic racemic material (52:48 e.r. shown; Chiralcel OD–H column, 100% hexanes, 0.3 mL/min, 220 nm).

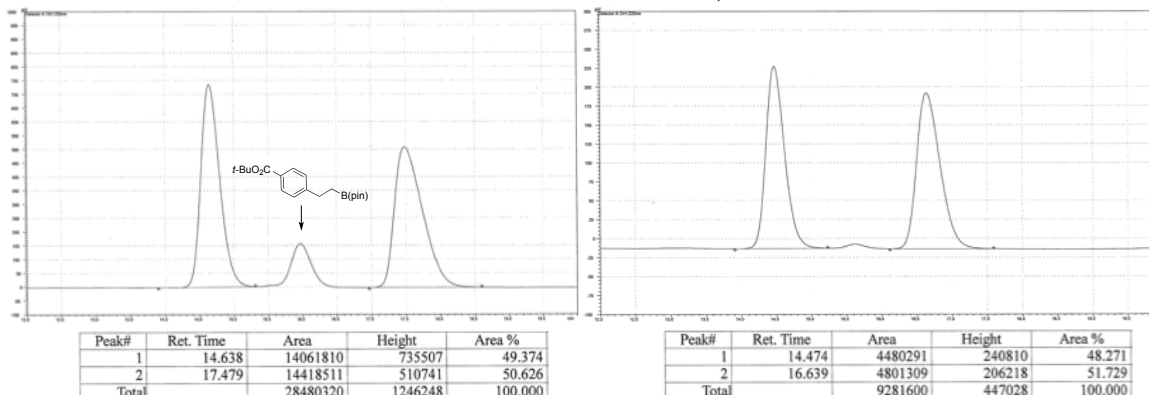

| Peak # | Time (min) | Area (%) | Peak # | Time (min) | Area (%) |
|--------|------------|----------|--------|------------|----------|
| 1      | 14.638     | 49.374   | 1      | 14.474     | 48.271   |
| 2      | 17.479     | 50.626   | 2      | 16.639     | 51.729   |

**(R)-4,4,5,5-Tetramethyl-2-(2-(4-(trifluoromethyl)phenyl)pent-4-en-1-yl)-1,3,2-dioxaborolane (2l):** Following the representative procedure except for 1:3 (0.1 mmol: 0.3 mmol) alkene:carbonate (**1e**) used. The spectroscopic data match those reported previously.<sup>5</sup>  $^1\text{H}$  NMR (400 MHz,  $\text{CDCl}_3$ ):  $\delta$  7.58 (1H, d,  $J = 8.0$  Hz), 7.50–7.43 (2H, m), 7.26–7.22 (1H, m), 5.70 (1H, ddt,  $J = 18.0, 10.0, 7.2$  Hz), 4.99–4.92 (2H, m), 3.42 (1H, app pent,  $J = 7.4$  Hz), 2.45–2.25 (2H, m), 1.26 (1H, dd,  $J = 15.4, 7.0$  Hz), 1.14 (1H, dd,  $J = 15.6, 8.4$  Hz), 1.08 (6H, s), 1.05 (6H, s). Specific Rotation:  $[\alpha]_{\text{D}}^{20} +6.1$  ( $c$  0.45,  $\text{CHCl}_3$ ) for an enantiomerically enriched sample of 96:4 e.r. Enantiomeric purity was determined by HPLC

analysis of the alcohol product after oxidation in comparison with authentic racemic material (96:4 e.r. shown; Chiralcel OZ–H column, 99% hexanes, 0.3 mL/min, 220 nm).

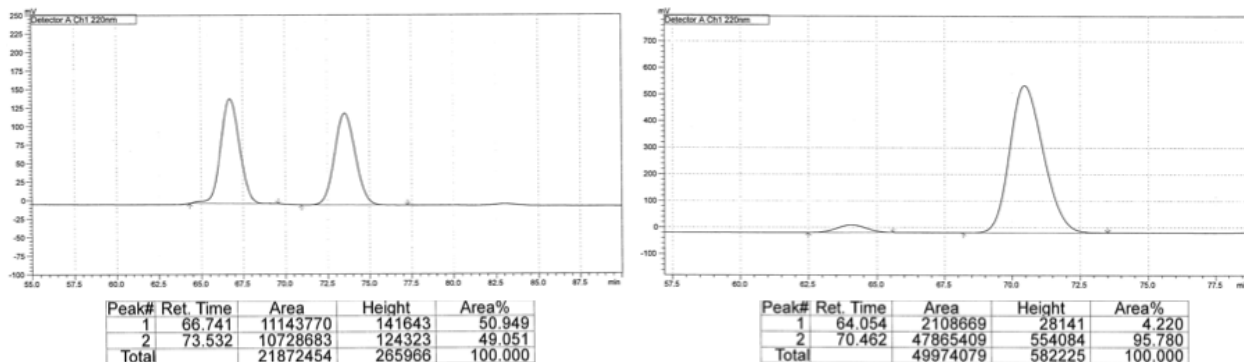

| Peak # | Time (min) | Area (%) | Peak # | Time (min) | Area (%) |
|--------|------------|----------|--------|------------|----------|
| 1      | 66.741     | 50.949   | 1      | 64.054     | 4.220    |
| 2      | 73.532     | 49.051   | 2      | 70.462     | 95.780   |

**tert-Butyl (R)-5-(1-(4,4,5,5-tetramethyl-1,3,2-dioxaborolan-2-yl)pent-4-en-2-yl)-1H-indole-1-carboxylate (2m):** Following the representative procedure except for 6:1 (0.6 mmol: 0.1 mmol) alkene:phosphate used. IR (neat): 2977 (m), 2927 (w), 1731 (s), 1469 (m), 1441 (w), 1352 (s), 1318 (s), 1253 (m), 1162 (s), 1141 (s), 1081 (m), 1022 (m), 968 (w), 846 (w), 766 (m), 725 (m)  $\text{cm}^{-1}$ ;  $^1\text{H}$  NMR (400 MHz,  $\text{CDCl}_3$ ):  $\delta$  8.00 (1H, d,  $J = 8$  Hz), 7.54 (1H, d,  $J = 3.6$  Hz), 7.38 (1H, d,  $J = 1.6$  Hz), 7.17 (1H, dd,  $J = 8.8, 2.0$  Hz), 6.50 (1H, d,  $J = 3.6$  Hz), 5.68 (1H, ddt,  $J = 17, 10.4, 6.4$  Hz), 4.98–4.88 (2H, m), 3.04 (1H, app pent,  $J = 7.0$  Hz), 2.46–2.34 (2H, m), 1.66 (9H, s), 1.30–1.25 (1H, m), 1.19–1.13 (1H, m), 1.09 (6H, s), 1.08 (6H, s);  $^{13}\text{C}$  NMR (100 MHz,  $\text{CDCl}_3$ ):  $\delta$  150.1, 141.4, 137.5, 133.8, 130.7, 125.9, 124.1, 119.5, 116.0, 114.8, 107.5, 83.5, 83.1, 44.2, 41.4, 28.4, 24.9, 24.8; HRMS (DART): Calcd for  $\text{C}_{24}\text{H}_{35}\text{B}_1\text{N}_1\text{O}_4$   $[\text{M}+\text{H}]^+$ : 412.2659, Found: 412.2653; Specific Rotation:  $[\alpha]_{\text{D}}^{20} +17.1$  ( $c$  0.43,  $\text{CHCl}_3$ ) for an enantiomerically enriched sample of 98:2 e.r. Enantiomeric purity was determined by HPLC analysis in comparison with authentic racemic material (98:2 e.r. shown; Chiralcel AD–H column, 100% hexanes, 0.3 mL/min, 220 nm).

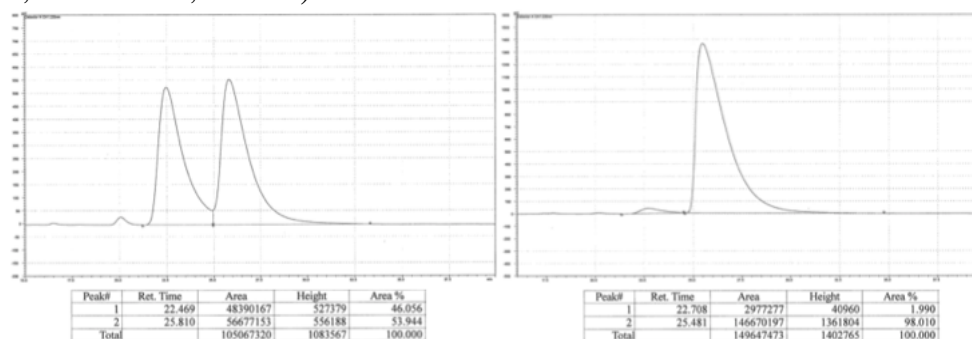

| Peak # | Time (min) | Area (%) | Peak # | Time (min) | Area (%) |
|--------|------------|----------|--------|------------|----------|
| 1      | 22.469     | 46.056   | 1      | 22.708     | 1.990    |
| 2      | 25.810     | 53.944   | 2      | 25.481     | 98.010   |

**(R)-2-(2,4-Diphenylpent-4-en-1-yl)-4,4,5,5-tetramethyl-1,3,2-dioxaborolane (2n):** Following the representative procedure except for 1:3 (0.1 mmol: 0.3 mmol) alkene:phosphate used. IR (neat): 3027 (w), 2977 (w), 2929 (w), 1494 (m), 1452 (w), 1369 (s), 1320 (s), 1145 (s), 699 (s)  $\text{cm}^{-1}$ ;  $^1\text{H}$  NMR (400 MHz,  $\text{CDCl}_3$ ):  $\delta$  7.39–7.36 (2H, m), 7.33–7.19 (5H, m), 7.14–7.09 (3H, m), 5.15 (1H, d,  $J = 2.0$  Hz), 4.83 (1H, d,  $J = 1.2$  Hz), 2.96 (1H, app pent,  $J = 7.7$  Hz), 2.87 (1H, dd,  $J = 13.8, 7.0$  Hz), 2.73 (1H, dd,  $J = 13.6, 8.0$  Hz), 1.26 (1H, dd,  $J = 15.6, 6.8$  Hz), 1.13 (1H, dd,  $J = 15.6, 9.2$  Hz), 1.07 (6H, s), 1.05 (6H, s);  $^{13}\text{C}$  NMR (100 MHz,  $\text{CDCl}_3$ ):  $\delta$  146.9, 146.8, 141.2, 128.4, 128.1, 127.6, 127.4, 126.6, 125.9, 114.5, 83.1, 45.7, 39.9, 24.8, 24.7; HRMS (DART): Calcd for  $\text{C}_{23}\text{H}_{30}\text{B}_1\text{O}_2$   $[\text{M}+\text{H}]^+$ : 349.2339, Found: 349.2347; Specific Rotation:  $[\alpha]_{20}^{\text{D}} -11.9$  (c 0.50,  $\text{CHCl}_3$ ) for an enantiomerically enriched sample of 88:12 e.r. Enantiomeric purity was determined by HPLC analysis of the alcohol product after oxidation in comparison with authentic racemic material (96:4 e.r. shown; Chiralcel OD–H column, 99% hexanes, 1% *i*-PrOH, 0.3 mL/min, 220 nm).

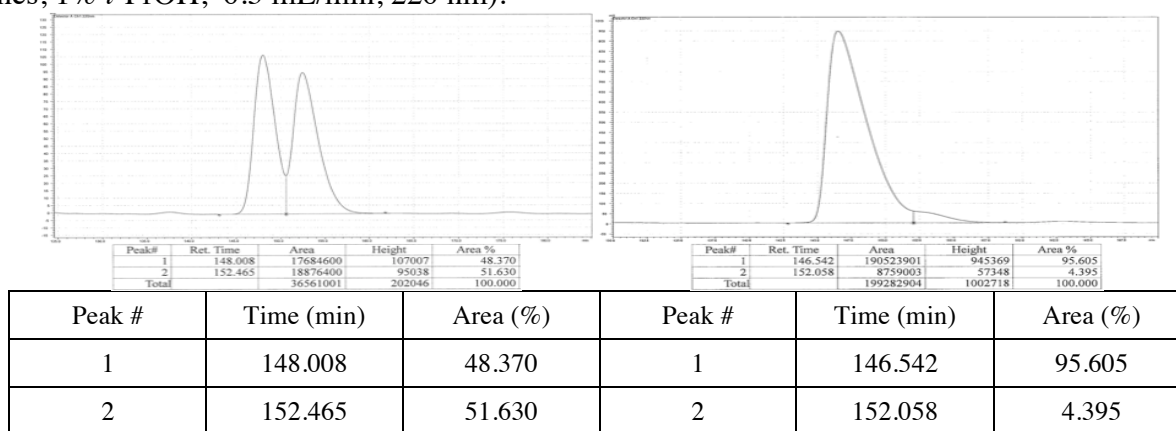

**(R)-4,4,5,5-Tetramethyl-2-(4-methyl-2-phenylpent-4-en-1-yl)-1,3,2-dioxaborolane (2o):** Following the representative procedure except for 1:6 (0.1 mmol: 0.6 mmol) alkene:phosphate used. IR (neat): 3028 (w), 2978 (m), 2929 (m), 1453 (w), 1369 (s), 1320 (m), 1145 (s), 968 (w), 888 (w), 699 (m)  $\text{cm}^{-1}$ ;  $^1\text{H}$  NMR (400 MHz,  $\text{CDCl}_3$ ):  $\delta$  7.24–7.18 (4H, m), 7.13–7.10 (1H, m), 4.64 (1H, s), 4.56 (1H, s), 3.03 (1H, app pent,  $J = 7.7$  Hz), 2.29 (2H, d,  $J = 7.6$  Hz), 1.65 (3H, s), 1.24–1.16 (1H, m), 1.09–1.03 (13H, m);  $^{13}\text{C}$  NMR (100 MHz,  $\text{CDCl}_3$ ):  $\delta$  147.2, 144.3, 128.1, 127.5, 125.9, 112.4, 83.0, 48.3, 39.8, 24.83, 24.75, 22.5; HRMS (DART): Calcd for  $\text{C}_{18}\text{H}_{28}\text{B}_1\text{O}_2$   $[\text{M}+\text{H}]^+$ : 287.2182, Found: 287.2189; Specific Rotation:  $[\alpha]_{\text{D}}^{20} +5.7$  (c 0.33,  $\text{CHCl}_3$ ) for an enantiomerically enriched sample of 90:10 e.r. Enantiomeric purity was determined by HPLC analysis of the alcohol product after oxidation in comparison with authentic racemic material (95:5 e.r. shown; Chiralpak AD–H column, 99% hexanes, 1% *i*-PrOH, 0.3 mL/min, 220 nm).

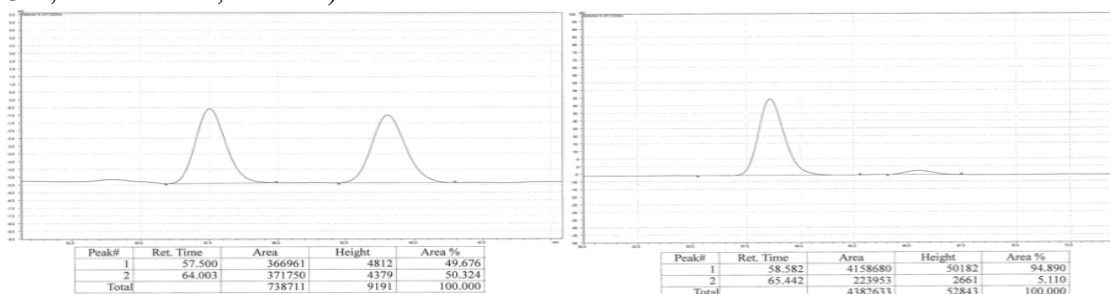

| Peak # | Time (min) | Area (%) | Peak # | Time (min) | Area (%) |
|--------|------------|----------|--------|------------|----------|
| 1      | 57.500     | 49.676   | 1      | 58.582     | 94.890   |
| 2      | 64.003     | 50.324   | 2      | 65.442     | 5.110    |

**(R)-Trimethyl(4-phenyl-5-(4,4,5,5-tetramethyl-1,3,2-dioxaborolan-2-yl)pent-1-en-2-yl)silane (2p):** IR (neat): 2978 (w), 2955 (w), 1368 (s), 1319 (m), 1247 (m), 1145 (s), 968 (w), 836 (s), 757 (m), 699 (m)  $\text{cm}^{-1}$ ;  $^1\text{H}$  NMR (400 MHz,  $\text{CDCl}_3$ ):  $\delta$  7.25–7.18 (4H, m), 7.15–7.10 (1H, m), 5.45–5.44 (1H, m), 5.31 (1H, d,  $J = 3.2$  Hz), 3.06–2.98 (1H, m), 2.49–2.35 (1H, m), 1.26–1.20 (1H, m), 1.09–1.01 (13H, m), 0.07 (9H, m);  $^{13}\text{C}$  NMR (100 MHz,  $\text{CDCl}_3$ ):  $\delta$  150.3, 147.4, 128.1, 127.7, 126.5, 125.8, 83.0, 45.9, 40.7, 24.9, 24.8,  $-1.2$ ; HRMS (DART): Calcd for  $\text{C}_{20}\text{H}_{34}\text{B}_1\text{O}_2\text{Si}_1$   $[\text{M}+\text{H}]^+$ : 345.2421, Found: 345.2424. Specific Rotation:  $[\alpha]_{\text{D}}^{20} +7.9$  ( $c$  0.33,  $\text{CHCl}_3$ ) for an enantiomerically enriched sample of 95:5 e.r. Enantiomeric purity was determined by HPLC analysis in comparison with authentic racemic material (96:4 e.r. shown; Chiralcel OD–H column, 100% hexanes, 0.3 mL/min, 220 nm).

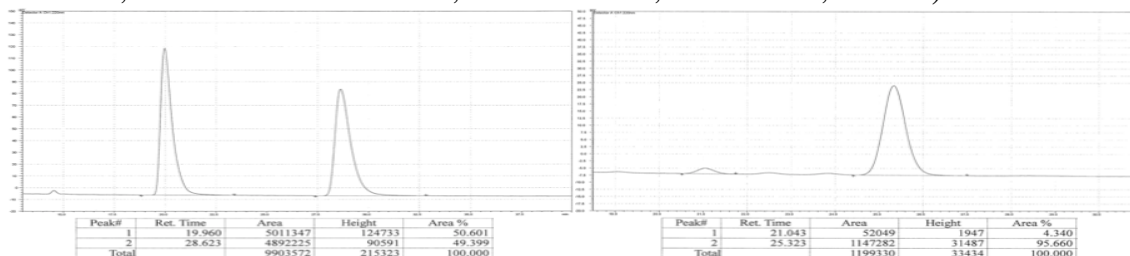

| Peak # | Time (min) | Area (%) | Peak # | Time (min) | Area (%) |
|--------|------------|----------|--------|------------|----------|
| 1      | 19.960     | 50.601   | 1      | 21.043     | 4.340    |
| 2      | 28.623     | 49.399   | 2      | 25.323     | 95.660   |

**(R)-6-Methyl-2-(4-(1-(4,4,5,5-tetramethyl-1,3,2-dioxaborolan-2-yl)pent-4-en-2-yl)phenyl)-1,3,6,2-dioxazaborocane-4,8-dione (2q):** IR (neat): 2977 (w), 2927 (w), 1765 (s), 1457 (w), 1370 (m), 1334 (m), 1293 (m), 1235 (m), 1145 (m), 1040 (m), 993 (m)  $\text{cm}^{-1}$ ;  $^1\text{H}$  NMR (400 MHz,  $\text{CDCl}_3$ ):  $\delta$  7.40 (2H, d,  $J = 7.6$  Hz), 7.23 (2H, d,  $J = 8.0$  Hz), 5.69–5.59 (1H, m), 4.96–4.88 (2H, m), 3.93 (2H, d,  $J = 16.4$  Hz), 3.75 (2H, d,  $J = 16.0$  Hz), 2.95 (1H, app pent,  $J = 7.5$  Hz), 2.51 (3H, s), 2.38–2.32 (2H, m), 1.23 (1H, dd,  $J = 15.2, 7.2$  Hz), 1.12–1.06 (13H, m);  $^{13}\text{C}$  NMR (100 MHz,  $\text{CDCl}_3$ ):  $\delta$  167.5, 149.0, 137.1, 132.2, 127.7, 116.3, 83.1, 61.8, 47.5, 43.6, 41.4, 24.9, 24.8; HRMS (DART): Calcd for  $\text{C}_{22}\text{H}_{35}\text{B}_2\text{N}_2\text{O}_6$   $[\text{M}+\text{NH}_4]^+$ : 445.2681, Found: 445.2689. Specific Rotation:  $[\alpha]_{\text{D}}^{20} +6.4$  ( $c$  0.87,  $\text{CHCl}_3$ ) for an enantiomerically enriched sample of 95:5 e.r. Enantiomeric purity was determined by HPLC analysis of the product from oxidation/acetylation in comparison with authentic racemic material (95:5 e.r. shown; Chiralcel OC–H column, 98% hexanes, 2% *i*-PrOH, 0.3 mL/min, 220 nm).

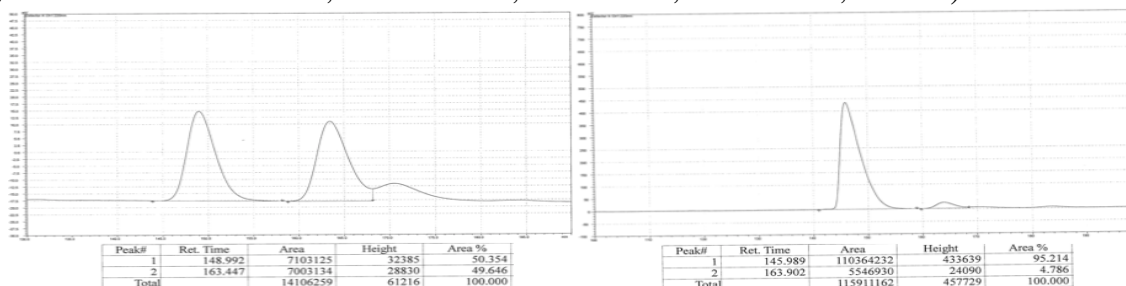

| Peak # | Time (min) | Area (%) | Peak # | Time (min) | Area (%) |
|--------|------------|----------|--------|------------|----------|
| 1      | 148.992    | 50.354   | 1      | 145.989    | 95.214   |
| 2      | 163.447    | 49.646   | 2      | 163.902    | 4.786    |

## 6. Additional Examples of Single-Catalyzed Multicomponent Reaction

**Scheme 1.** Additional Substrates Scope

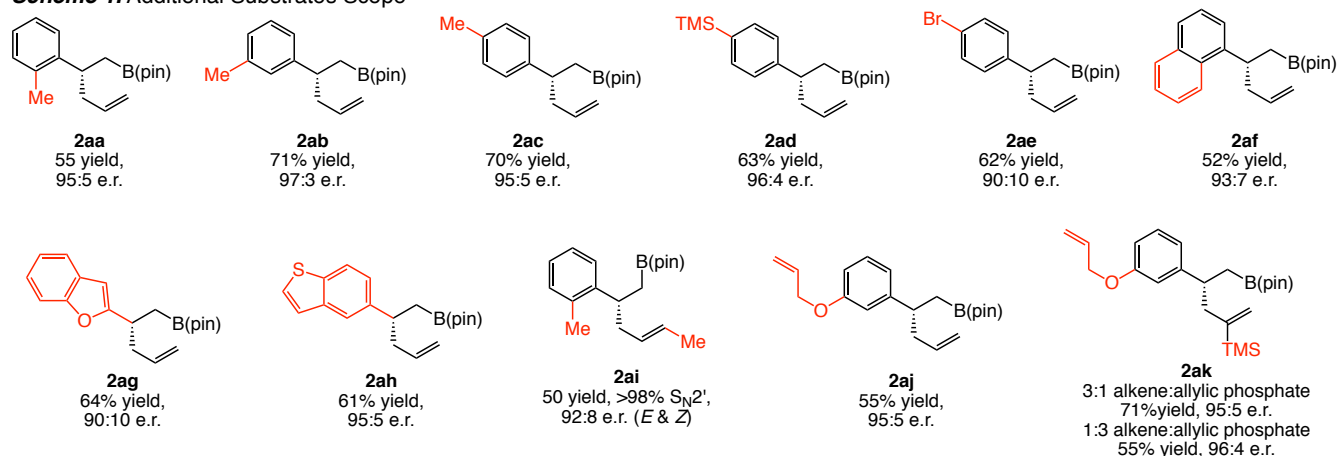

**(R)-4,4,5,5-Tetramethyl-2-(2-(*o*-tolyl)pent-4-en-1-yl)-1,3,2-dioxaborolane (2aa):** IR (neat): 2977 (w), 2928 (w), 1365 (s), 1317 (s), 1144 (s), 968 (m), 911 (m), 846 (m), 758 (m), 726 (m) cm<sup>-1</sup>; <sup>1</sup>H NMR (CDCl<sub>3</sub>, 400 MHz): δ 7.20 (1H, d, *J* = 8.0 Hz), 7.14 (1H, t, *J* = 7.2 Hz), 7.09–7.01 (2H, m), 5.74–5.63 (1H, m), 4.99–4.91 (2H, m), 3.23 (1H, app pent, *J* = 7.3 Hz), 2.38–2.24 (2H, m), 2.36 (3H, s), 1.23 (1H, dd, *J* = 14.6, 7.8 Hz), 1.12 (1H, dd, *J* = 16.0, 8.0 Hz), 1.05 (s, 6H), 1.03 (6H, s); <sup>13</sup>C NMR (CDCl<sub>3</sub>, 100 MHz): δ 145.1, 137.3, 135.7, 130.0, 126.1, 125.6, 116.1, 83.0, 43.6, 36.0, 24.7, 20.0; HRMS (DART): Calcd for C<sub>18</sub>H<sub>28</sub>B<sub>1</sub>O<sub>2</sub> [M+H]<sup>+</sup>: 287.2182, Found: 287.2177; Specific Rotation: [α]<sub>D</sub><sup>20</sup> +8.8 (*c* 1.32, CHCl<sub>3</sub>) for an enantiomerically enriched sample of 95:5 e.r. Enantiomeric purity was determined by HPLC analysis in comparison with authentic racemic material (95:5 e.r. shown; Chiralcel OD–H column, 100% hexanes, 0.3 mL/min, 220 nm).

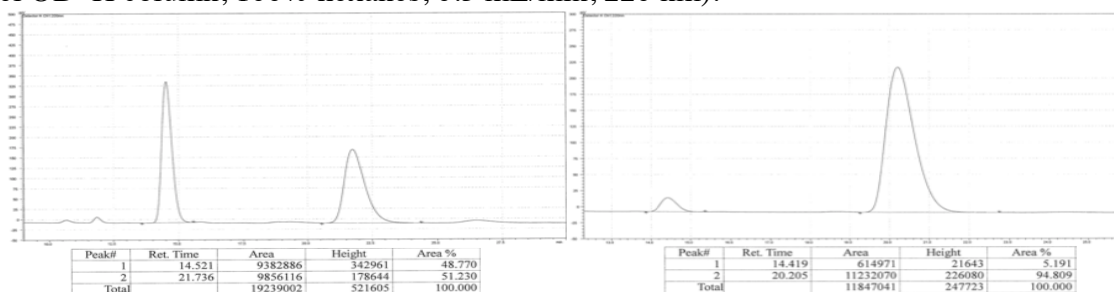

| Peak # | Time (min) | Area (%) | Peak # | Time (min) | Area (%) |
|--------|------------|----------|--------|------------|----------|
| 1      | 14.521     | 48.770   | 1      | 14.419     | 5.191    |
| 2      | 21.736     | 51.230   | 2      | 20.205     | 94.809   |

**(R)-4,4,5,5-Tetramethyl-2-(2-(*m*-tolyl)pent-4-en-1-yl)-1,3,2-dioxaborolane (2ab):** IR (neat): 2977 (w), 2922 (w), 1366 (s), 1319 (s), 1144 (s), 968 (m), 847 (m), 704 (m) cm<sup>-1</sup>; <sup>1</sup>H NMR (CDCl<sub>3</sub>, 400 MHz): δ 7.15 (1H, dd, *J* = 9.0, 6.2 Hz), 7.00 (1H, s), 6.97–6.93 (2H, m), 5.72–5.62 (1H, m), 4.98–4.89 (2H, m), 2.89 (1H, app pent, *J* = 7.6 Hz), 2.40–2.26 (5H, m), 1.25–1.18 (1H, m), 1.11–1.03 (13H, m);

$^{13}\text{C}$  NMR ( $\text{CDCl}_3$ , 100 MHz):  $\delta$  146.9, 137.5, 137.46, 128.4, 128.1, 126.7, 124.5, 116.0, 83.1, 43.7, 41.4, 24.82, 24.79, 21.6; HRMS (DART): Calcd for  $\text{C}_{18}\text{H}_{28}\text{B}_1\text{O}_2$   $[\text{M}+\text{H}]^+$ : 287.2182, Found: 287.2188; Specific Rotation:  $[\alpha]_{\text{D}}^{20} +16.9$  ( $c$  0.98,  $\text{CHCl}_3$ ) for an enantiomerically enriched sample of 97:3 e.r. Enantiomeric purity was determined by HPLC analysis in comparison with authentic racemic material (97:3 e.r. shown; Chiralcel OD–H column, 100% hexanes, 0.3 mL/min, 220 nm).

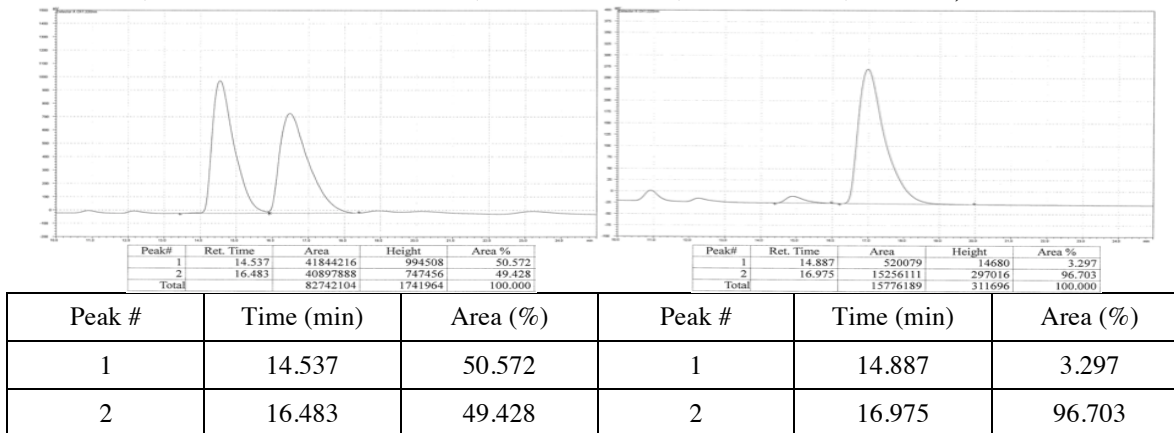

**(R)-4,4,5,5-Tetramethyl-2-(2-(*p*-tolyl)pent-4-en-1-yl)-1,3,2-dioxaborolane (2ac):** IR (neat): 2977 (m), 2924 (m), 1514 (w), 1368 (s), 1322 (s), 1145 (s), 968 (m), 911 (m), 846 (m), 813 (m)  $\text{cm}^{-1}$ ;  $^1\text{H}$  NMR ( $\text{CDCl}_3$ , 600 MHz):  $\delta$  7.09 (2H, d,  $J = 5.2$  Hz), 7.06 (2H, d,  $J = 5.6$  Hz), 5.71–5.64 (1H, m), 4.97–4.90 (2H, m), 2.91 (1H, app pent,  $J = 5.0$  Hz), 2.39–2.30 (5H, m), 1.21 (1H, dd,  $J = 9.8, 4.2$  Hz), 1.12–1.06 (13H, m);  $^{13}\text{C}$  NMR ( $\text{CDCl}_3$ , 150 MHz):  $\delta$  143.9, 137.5, 135.3, 128.9, 127.4, 116.0, 83.1, 43.8, 41.0, 24.84, 24.81, 21.1; HRMS (DART): Calcd for  $\text{C}_{18}\text{H}_{28}\text{B}_1\text{O}_2$   $[\text{M}+\text{H}]^+$ : 287.2182, Found: 287.2184; Specific Rotation:  $[\alpha]_{\text{D}}^{20} +8.6$  ( $c$  1.00,  $\text{CHCl}_3$ ) for an enantiomerically enriched sample of 95:5 e.r. Enantiomeric purity was determined by HPLC analysis in comparison with authentic racemic material (95:5 e.r. shown; Chiralcel OD–H column, 100% hexanes, 0.3 mL/min, 220 nm).

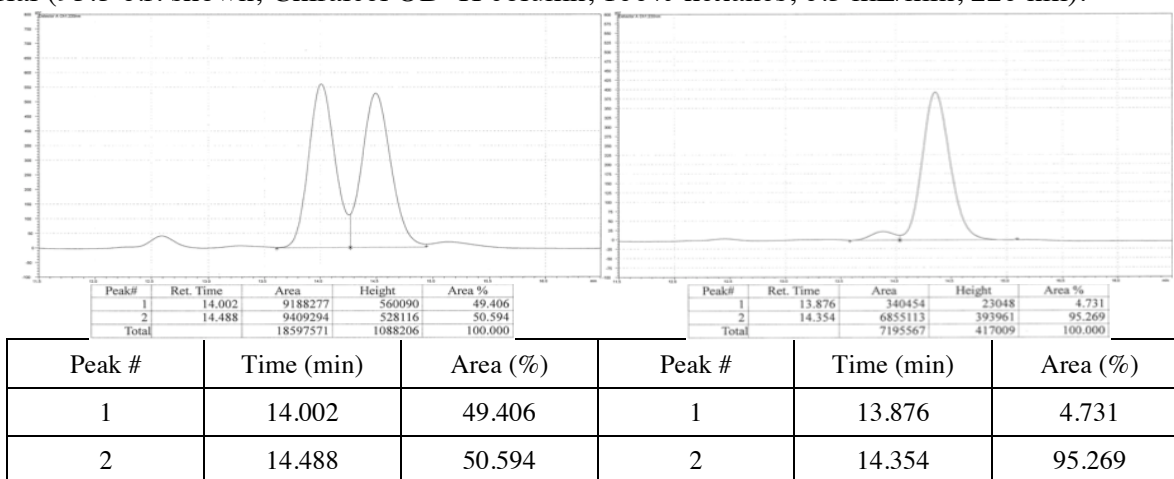

**(R)-Trimethyl(4-(1-(4,4,5,5-tetramethyl-1,3,2-dioxaborolan-2-yl)pent-4-en-2-yl)phenyl)silane (2ad):** IR (neat): 3068 (w), 2977 (m), 2955 (m), 2926 (w), 1640 (w), 1599 (w), 1365 (s), 1322 (s), 1164 (m), 1144 (s), 1110 (m), 997 (m), 968 (m), 911 (m), 837 (s), 757 (m), 725 (m)  $\text{cm}^{-1}$ ;  $^1\text{H}$  NMR ( $\text{CDCl}_3$ , 400 MHz):  $\delta$  7.41 (2H, d,  $J = 8.1$  Hz), 7.23–7.17 (2H, m), 5.70 (1H, dddd,  $J = 16.8, 10.1, 7.6, 6.5$  Hz),

4.98 (1H, ddt,  $J = 17.2, 2.5, 1.4$  Hz), 4.93 (1H, ddt,  $J = 10.1, 2.1, 1.0$  Hz), 2.99–2.88 (1H, m), 2.46–2.26 (2H, m), 1.29–1.20 (2H, m), 1.09 (6H, s), 1.08 (6H, s), 0.23 (9H, s);  $^{13}\text{C}$  NMR ( $\text{CDCl}_3$ , 100 MHz):  $\delta$  147.6, 137.5, 137.3, 133.2, 127.0, 116.1, 83.0, 43.5, 41.4, 24.8, 24.7,  $-0.8, -0.9$ ; HRMS (DART): Calcd for  $\text{C}_{20}\text{H}_{34}\text{BO}_2\text{Si}$   $[\text{M}+\text{H}]^+$ : 345.2421, Found: 345.2431; Specific Rotation:  $[\alpha]_{\text{D}}^{20} +8.2$  ( $c$  0.85,  $\text{CHCl}_3$ ) for an enantiomerically enriched sample of 96:4 e.r. Enantiomeric purity was determined by HPLC analysis of the alcohol product after oxidation in comparison with authentic racemic material (96:4 e.r. shown; Chiralcel AZ–H column, 99% hexanes, 1% *i*-PrOH, 0.3 mL/min, 220 nm).

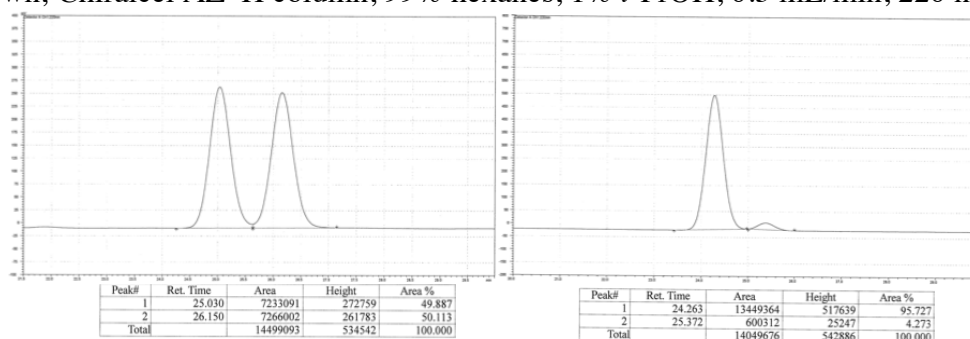

| Peak # | Time (min) | Area (%) | Peak # | Time (min) | Area (%) |
|--------|------------|----------|--------|------------|----------|
| 1      | 25.030     | 49.887   | 1      | 24.263     | 95.727   |
| 2      | 26.150     | 50.113   | 2      | 25.372     | 4.273    |

**(R)-2-(2-(4-Bromophenyl)pent-4-en-1-yl)-4,4,5,5-tetramethyl-1,3,2-dioxaborolane (2ae):**

Following the representative procedure except for 1:3 (0.1 mmol: 0.3 mmol) alkene:phosphate used. IR (neat): 2977 (w), 2926 (w), 1488 (w), 1368 (s), 1320 (s), 1143 (s), 1073 (m), 1010 (m), 968 (m), 913 (m), 846 (m), 820 (m)  $\text{cm}^{-1}$ ;  $^1\text{H}$  NMR (400 MHz,  $\text{CDCl}_3$ ):  $\delta$  7.37 (2H, d,  $J = 6.4$ , Hz), 7.07 (2H, d,  $J = 7.6$  Hz), 5.63 (1H, ddt, 17.2, 10.0, 7.2 Hz), 4.97–4.91 (2H, m), 2.94–2.87 (1H, m), 2.32 (2H, t,  $J = 7.0$  Hz), 1.21 (1H, dd,  $J = 15.4, 6.6$  Hz), 1.12 (6H, s), 1.10 (6H, s), 1.09–1.03 (1H, m);  $^{13}\text{C}$  NMR (100 MHz,  $\text{CDCl}_3$ ):  $\delta$  145.9, 136.8, 131.2, 129.4, 119.6, 116.5, 83.2, 43.6, 41.0, 24.9, 24.8; HRMS (DART): Calcd for  $\text{C}_{17}\text{H}_{25}\text{B}_1\text{Br}_1\text{O}_2$   $[\text{M}+\text{H}]^+$ : 351.1131, Found: 351.1141; Specific Rotation:  $[\alpha]_{\text{D}}^{20} +4.1$  ( $c$  0.85,  $\text{CHCl}_3$ ) for an enantiomerically enriched sample of 90:10 e.r. Enantiomeric purity was determined by HPLC analysis in comparison with authentic racemic material (90:10 e.r. shown; Chiralcel OZ–H column, 100% hexanes, 0.3 mL/min, 220 nm).

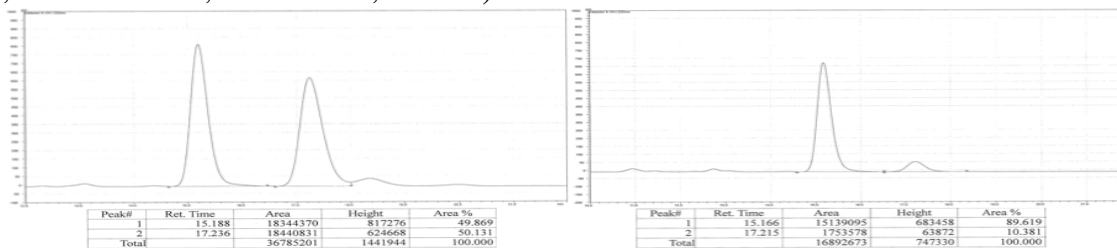

| Peak # | Time (min) | Area (%) | Peak # | Time (min) | Area (%) |
|--------|------------|----------|--------|------------|----------|
| 1      | 15.188     | 49.869   | 1      | 15.166     | 89.619   |
| 2      | 17.236     | 50.131   | 2      | 17.215     | 10.381   |

**(R)-4,4,5,5-Tetramethyl-2-(2-(naphthalen-1-yl)pent-4-enyl)-1,3,2-dioxaborolane (2af):** IR (neat): 2976 (w), 2975 (w), 1367 (s), 1312 (s), 1251 (w), 1142 (s), 967 (m), 846 (m), 792 (s)  $\text{cm}^{-1}$ ;  $^1\text{H}$  NMR ( $\text{CDCl}_3$ , 400 MHz):  $\delta$  8.22 (1H, d,  $J = 8.1$  Hz), 7.83 (1H, dd,  $J = 7.9, 1.6$  Hz), 7.68 (1H, dd,  $J = 6.9, 2.5$  Hz), 7.56–7.37 (4H, m), 5.75 (1H, ddt,  $J = 17.2, 10.1, 7.0$  Hz), 5.06–4.91 (2H, m), 3.90 (1H, app pent,  $J = 7.3$  Hz), 2.66–2.53 (1H, m), 2.50–2.38 (1H, m), 1.47–1.35 (1H, m), 1.35–1.23 (1H, m), 1.04 (6H, s), 0.96 (6H, s);  $^{13}\text{C}$  NMR ( $\text{CDCl}_3$ , 100 MHz):  $\delta$  143.2, 137.2, 134.0, 131.8, 128.8, 126.4, 125.6, 125.6, 125.3, 123.9, 123.4, 116.4, 83.1, 43.3, 35.0, 24.7; HRMS (DART): Calcd for  $\text{C}_{21}\text{H}_{28}\text{B}_1\text{O}_2$   $[\text{M}+\text{H}]^+$ : 323.2182, Found: 323.2185; Specific Rotation:  $[\alpha]_{\text{D}}^{20} +5.6$  ( $c$  1.08,  $\text{CHCl}_3$ ) for an enantiomerically enriched sample of 93:7 e.r. Enantiomeric purity was determined by HPLC analysis in comparison with authentic racemic material (93:7 e.r. shown; Chiralcel OJ–H column, 100% hexanes, 0.3 mL/min, 220 nm).

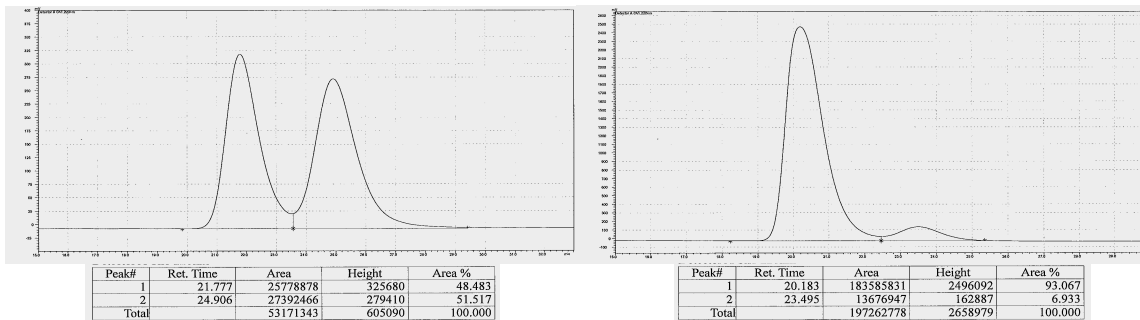

| Peak # | Time (min) | Area (%) | Peak # | Time (min) | Area (%) |
|--------|------------|----------|--------|------------|----------|
| 1      | 21.777     | 48.483   | 1      | 20.183     | 93.067   |
| 2      | 24.906     | 51.517   | 2      | 23.495     | 6.933    |

**(R)-2-(2-(Benzofuran-2-yl)pent-4-enyl)-4,4,5,5-tetramethyl-1,3,2-dioxaborolane (2ag) :** IR (neat): 2977 (w), 2928 (w), 1584 (w), 1455 (m), 1370 (s), 1321 (s), 1253(w), 1142 (s), 1006 (m), 912 (m), 846 (m), 796 (m), 749 (s), 738 (s), 671 (w)  $\text{cm}^{-1}$ ;  $^1\text{H}$  NMR ( $\text{CDCl}_3$ , 400 MHz):  $\delta$  7.49–7.44 (1H, m), 7.42–7.38 (1H, m), 7.22–7.13 (2H, m), 6.38 (1H, s), 5.76 (1H, ddt,  $J = 17.2, 10.1, 7.1$  Hz), 5.08–4.96 (2H, m), 3.26–3.16 (1H, m), 2.63–2.53 (1H, m), 2.49–2.38 (1H, m), 1.23 (2H, d,  $J = 7.7$  Hz), 1.20 (6H, s), 1.18 (6H, s);  $^{13}\text{C}$  NMR ( $\text{CDCl}_3$ , 100 MHz):  $\delta$  163.3, 154.7, 136.3, 129.0, 123.1, 122.4, 120.4, 117.0, 110.9, 101.4, 83.3, 40.3, 35.0, 24.94, 24.88; HRMS (DART): Calcd for  $\text{C}_{19}\text{H}_{26}\text{BO}_3$   $[\text{M}+\text{H}]^+$ : 313.1975, Found: 313.1987; Specific Rotation:  $[\alpha]_{\text{D}}^{20} +17.2$  ( $c$  1.67,  $\text{CHCl}_3$ ) for an enantiomerically enriched sample of 90:10 e.r. Enantiomeric purity was determined by HPLC analysis in comparison with authentic racemic material (90:10 e.r. shown; Chiralcel OZ–H column, 100% hexanes, 0.3 mL/min, 220 nm).



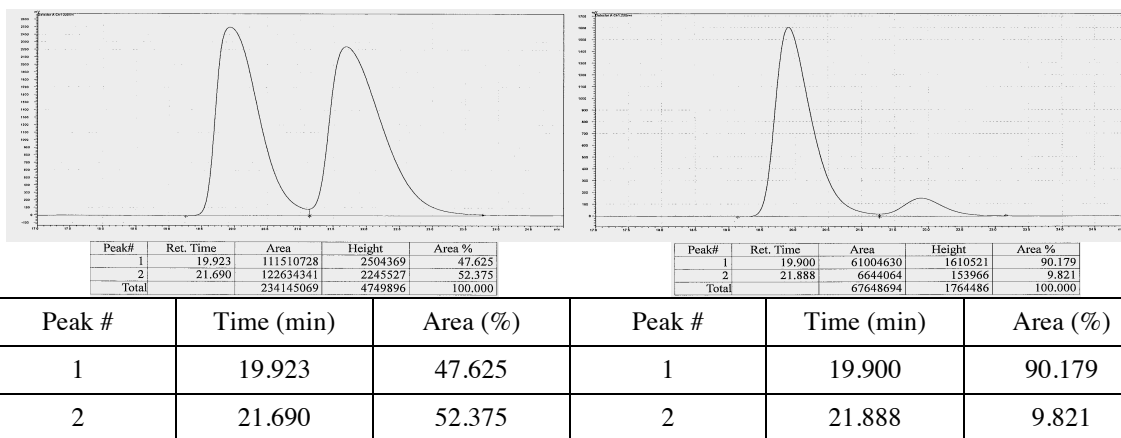

**(R)-2-(2-(Benzo[b]thiophen-5-yl)pent-4-en-1-yl)-4,4,5,5-tetramethyl-1,3,2-dioxaborolane (2ah):**

Following the representative procedure except for 1:3 (0.1 mmol: 0.3 mmol) alkene:phosphate used. IR (neat): 3073 (w), 2976 (w), 2924 (w), 1365 (s), 1319 (s), 11142 (s), 846 (m), 820 (m), 699 (s)  $\text{cm}^{-1}$ ;  $^1\text{H}$  NMR ( $\text{CDCl}_3$ , 400 MHz):  $\delta$  7.76 (1H, d,  $J = 8.4$  Hz), 7.65 (1H, s), 7.38 (1H, dd,  $J = 5.4, 0.6$  Hz), 7.27 (1H, d,  $J = 5.2$  Hz), 7.22 (1H, d,  $J = 8.4$  Hz), 5.74–5.64 (1H, m), 4.97 (1H, d,  $J = 17.2$  Hz), 4.92 (1H, dd  $J = 10.4, 0.8$  Hz), 3.08 (1H, app pent,  $J = 7.5$  Hz), 2.48–2.36 (2H, m), 1.30 (1H, dd,  $J = 15.8, 7.0$  Hz), 1.17 (1H, dd,  $J = 15.4, 9.0$  Hz), 1.07 (12H, s);  $^{13}\text{C}$  NMR ( $\text{CDCl}_3$ , 100 MHz):  $\delta$  152.3, 140.0, 139.2, 136.4, 124.0, 123.4, 122.9, 122.3, 119.8, 116.9, 83.4, 43.8, 37.6, 24.9, 24.8; HRMS (DART): Calcd for  $\text{C}_{19}\text{H}_{26}\text{B}_1\text{O}_2\text{S}_1$   $[\text{M}+\text{H}]^+$ : 329.1747, Found: 329.1744; Specific Rotation:  $[\alpha]_{\text{D}}^{20} +18.0$  ( $c$  1.23,  $\text{CHCl}_3$ ) for an enantiomerically enriched sample of 95:5 e.r. Enantiomeric purity was determined by HPLC analysis in comparison with authentic racemic material (95:5 e.r. shown; Chiralcel OZ-H column, 100% hexanes, 0.3 mL/min, 220 nm).

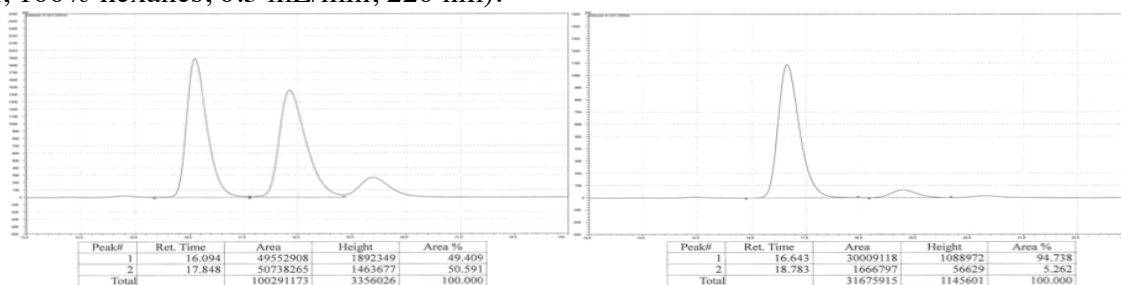

**(R)-4,4,5,5-Tetramethyl-2-(2-(o-tolyl)hex-4-en-1-yl)-1,3,2-dioxaborolane (2ai):** Following the representative procedure except **L3b** was used. The spectroscopic data match those reported previously.<sup>5</sup>  $^1\text{H}$  NMR (400 MHz,  $\text{CDCl}_3$ ):  $\delta$  7.26–7.01 (8H, m,  $E/Z$ ), 5.46–5.28 (4H, m,  $E/Z$ ), 3.24–3.13 (2H, m,  $E/Z$ ), 2.36 (3H, s,  $E$ ), 2.35 (3H, s,  $Z$ ), 2.32–2.13 (4H, m,  $E/Z$ ), 1.59 (3H, d,  $J = 5.6$  Hz,  $E$ ), 1.54 (3H, d,  $J = 6$  Hz,  $Z$ ), 1.23–1.10 (4H, m,  $E/Z$ ), 1.053 (6H, s,  $E$ ), 1.045 (6H, s,  $E$ ), 1.03 (6H, s,  $Z$ ), 1.02 (6H, s,  $Z$ ) Specific Rotation:  $[\alpha]_{\text{D}}^{20} +6.1$  ( $c$  0.45,  $\text{CHCl}_3$ ) for an enantiomerically enriched sample of 92:8 e.r. Enantiomeric purity was determined by HPLC analysis of the alcohol product after oxidation

in comparison with authentic racemic material prepared according to the procedure reported previously obtaining *rac-E-2ab*.<sup>5</sup> (92:8 e.r. shown for *E* and *Z*; Chiralcel OJ–H column, 98% hexanes, 0.3 mL/min, 220 nm).

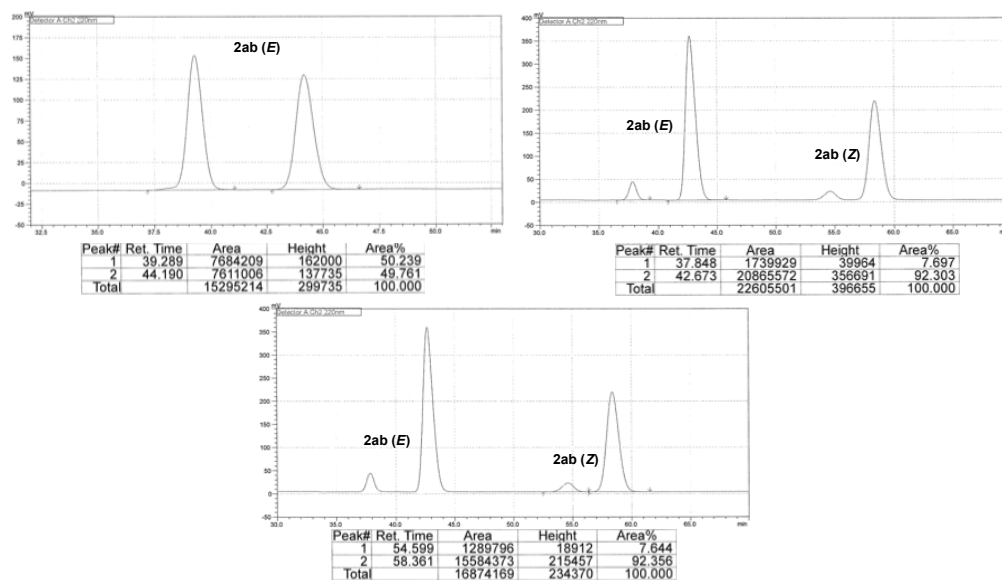

| Peak #           | Time (min) | Area (%) | Peak #         | Time (min) | Area (%) |
|------------------|------------|----------|----------------|------------|----------|
| 1 ( <i>rac</i> ) | 39.389     | 50.239   | 1 ( <i>E</i> ) | 37.848     | 7.697    |
| 2 ( <i>rac</i> ) | 44.190     | 49.761   | 2 ( <i>E</i> ) | 42.673     | 92.303   |
|                  |            |          | 1 ( <i>Z</i> ) | 54.599     | 7.644    |
|                  |            |          | 2 ( <i>Z</i> ) | 58.361     | 92.356   |

**(R)-2-(2-(3-(Allyloxy)phenyl)pent-4-enyl)-4,4,5,5-tetramethyl-1,3,2-dioxaborolane (2aj):** IR (neat): 3076 (w), 2977 (w), 2925 (w), 1600 (m), 1583 (m), 1422 (s), 1366 (s), 1265 (m), 1142 (s), 1034 (w), 913 (m), 846 (m), 776 (m), 699 (m) cm<sup>-1</sup>; <sup>1</sup>H NMR (CDCl<sub>3</sub>, 400 MHz): δ 7.16 (1H, t, *J* = 7.9 Hz), 6.84–6.76 (2H, m), 6.71 (1H, ddd, *J* = 8.2, 2.6, 0.9 Hz), 6.06 (1H, ddt, *J* = 17.3, 10.6, 5.3 Hz), 5.67 (1H, dddd, *J* = 16.9, 10.1, 7.5, 6.6 Hz), 5.40 (1H, dd, *J* = 17.3, 1.6 Hz), 5.27 (1H, dd, *J* = 10.5, 1.5 Hz), 5.00–4.87 (2H, m), 4.52 (2H, dt, *J* = 5.3, 1.5 Hz), 3.04–2.82 (1H, m), 2.43–2.26 (2H, m), 1.29–1.16 (2H, m), 1.12 (6H, s), 1.11 (6H, s); <sup>13</sup>C NMR (CDCl<sub>3</sub>, 100 MHz): δ 158.6, 148.7, 137.3, 133.7, 129.1, 120.2, 117.6, 116.2, 114.2, 112.2, 83.1, 68.8, 43.7, 41.5, 24.85, 24.82; HRMS (DART): Calcd for C<sub>20</sub>H<sub>30</sub>B<sub>1</sub>O<sub>3</sub> [M+H]<sup>+</sup>: 329.2288, Found: 329.2295; Specific Rotation: [α]<sub>D</sub><sup>20</sup> +6.4 (*c* 1.17, CHCl<sub>3</sub>) for an enantiomerically enriched sample of 95:5 e.r. Enantiomeric purity was determined by HPLC analysis in comparison with authentic racemic material (95:5 e.r. shown; Chiralcel OD–H column, 100% hexanes, 0.3 mL/min, 220 nm).

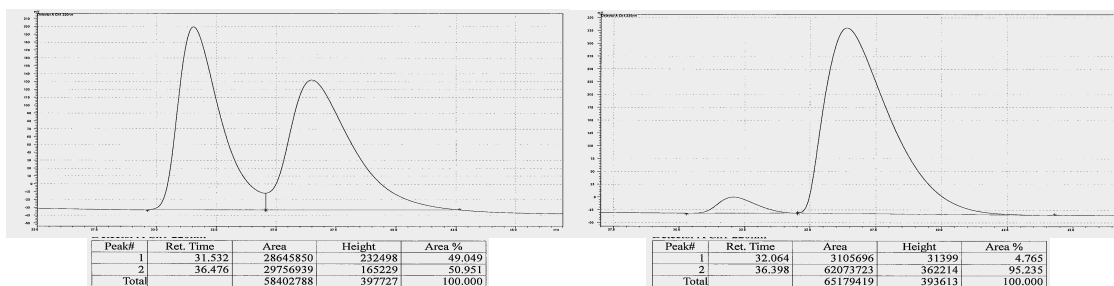

| Peak # | Time (min) | Area (%) | Peak # | Time (min) | Area (%) |
|--------|------------|----------|--------|------------|----------|
| 1      | 31.532     | 49.049   | 1      | 32.064     | 4.765    |
| 2      | 36.476     | 50.951   | 2      | 36.398     | 95.235   |

**(R)-(4-(3-(Allyloxy)phenyl)-5-(4,4,5,5-tetramethyl-1,3,2-dioxaborolan-2-yl)pent-1-en-2-yl)trimethylsilane (2ak):** IR (neat): 2977 (w), 2954 (w), 1600 (w), 1584 (w), 1366 (m), 1317 (m), 1247 (m), 1144 (s), 924 (m), 836 (s)  $\text{cm}^{-1}$ ;  $^1\text{H}$  NMR (500 MHz,  $\text{CDCl}_3$ ):  $\delta$  7.14 (1H, t,  $J = 6.2$  Hz), 6.80–6.77 (2H, m), 6.69 (1H, dd,  $J = 6.4, 2.0$  Hz), 6.10–6.02 (1H, m), 5.45–5.38 (2H, m), 5.32–5.26 (2H, m), 4.52–4.51 (2H, m), 2.99 (1H, app pent,  $J = 6.1$  Hz), 2.45 (1H, dd,  $J = 11.2, 6.0$  Hz), 2.38 (1H, dd,  $J = 11.2, 6.0$  Hz), 1.21 (1H, dd,  $J = 14.0, 3.6$  Hz), 1.11 (6H, s), 1.09 (6H, s), 1.02 (1H, dd,  $J = 12.2, 7.0$  Hz), 0.07 (9H, s);  $^{13}\text{C}$  NMR (125 MHz,  $\text{CDCl}_3$ ):  $\delta$  158.5, 150.3, 149.3, 133.8, 129.0, 126.5, 120.4, 117.5, 114.3, 112.1, 83.0, 68.8, 45.7, 40.7, 24.9, 24.8,  $-1.2$ ; HRMS (DART): Calcd for  $\text{C}_{23}\text{H}_{38}\text{B}_1\text{O}_3\text{Si}_1$   $[\text{M}+\text{H}]^+$ : 401.2683, Found: 401.2695; Specific Rotation:  $[\alpha]_{\text{D}}^{20} +4.7$  ( $c$  0.88,  $\text{CHCl}_3$ ) for an enantiomerically enriched sample of 95:5 e.r. Enantiomeric purity was determined by HPLC analysis in comparison with authentic racemic material (96:4 e.r. shown; Chiralcel OD–H column, 100% hexanes, 0.3 mL/min, 220 nm).

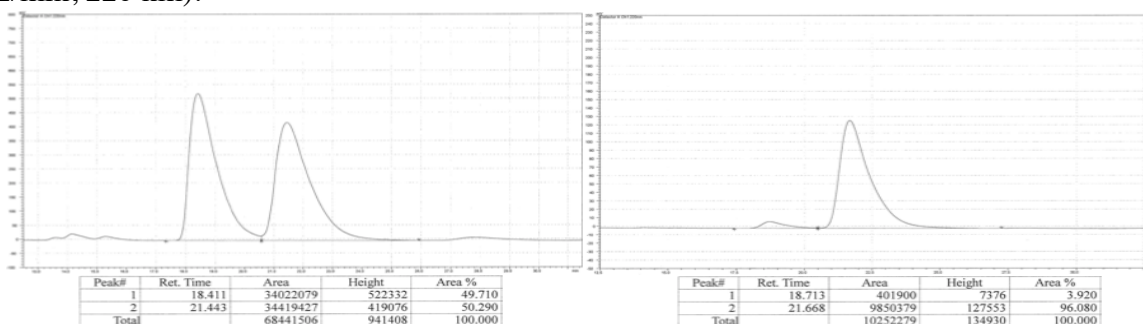

| Peak # | Time (min) | Area (%) | Peak # | Time (min) | Area (%) |
|--------|------------|----------|--------|------------|----------|
| 1      | 18.411     | 49.710   | 1      | 18.713     | 3.920    |
| 2      | 21.443     | 50.290   | 2      | 21.668     | 96.080   |

## 7. Formal Synthesis of (+)-Heliespirone A and (–)-Heliespirone C

**(R)-2-(2-(2,5-Dimethoxy-4-methylphenyl)pent-4-en-1-yl)-4,4,5,5-tetramethyl-1,3,2-dioxaborolane (2r):** In a  $\text{N}_2$ -filled glove box, a flame-dried 100 mL round-bottom flask equipped with a stir bar was charged with bisphosphine **L3b** (188 mg, 0.28 mmol),  $\text{NaOt-Bu}$  (742 mg, 7.7 mmol), and  $\text{CuCl}$  (26 mg, 0.26 mmol). The flask was sealed with a septum and electrical tape before removal from the glove box. Tetrahydrofuran (20 mL) was added and the resulting yellow solution was allowed to stir for 1 h

under N<sub>2</sub> at 22 °C. A solution of B<sub>2</sub>(pin)<sub>2</sub> (1.4 g, 5.7 mmol) in thf (15 mL) was added to the mixture at 0 °C, causing the solution to turn dark brown immediately. After 15 min, a solution of **9** (2.75 g, 15.5 mmol) in thf (5 mL) and allylphosphate (**1a**) [0.92 mL (1.0 g), 5.15 mmol] was added by syringe. The resulting mixture was allowed to stir at 22 °C for 18 h. Then, the mixture was passed through a short plug of silica gel (4x4 cm) and eluted with Et<sub>2</sub>O. The organic layer was concentrated under reduced pressure, affording yellow oil, which was purified by silica gel chromatography (100% hexanes→hexanes:Et<sub>2</sub>O = 10:1) to afford **2r** as colorless oil (1.1 g, 3.3 mmol, 64% yield) and recovered **9** (1.68 g, 9.4 mmol, 91%). IR (neat): 2976 (w), 2931 (w), 2830 (w), 1506 (m), 1465 (m), 1398 (m), 1369 (m), 1316 (m), 1207 (s), 1143 (s), 1046 (s), 968 (m), 846 (m), 802 (m) cm<sup>-1</sup>; <sup>1</sup>H NMR (400 MHz, CDCl<sub>3</sub>): δ 6.68 (1H, s), 6.64 (1H, s), 5.71 (1H, ddt, *J* = 17.2, 9.8, 7.4 Hz), 4.98–4.89 (2H, m), 3.78 (3H, s), 3.76 (3H, s), 3.36 (1H, app pent, *J* = 7.5 Hz), 2.43–2.25 (2H, m), 2.18 (3H, s), 1.22 (1H, dd, *J* = 15.6, 7.6 Hz), 1.15–1.10 (1H, m), 1.13 (6H, s), 1.10 (6H, s); <sup>13</sup>C NMR (100 MHz, CDCl<sub>3</sub>): δ 151.7, 151.0, 137.8, 133.2, 124.2, 115.7, 114.4, 110.9, 82.9, 56.5, 56.2, 42.3, 34.2, 24.84, 24.81, 16.2; HRMS (DART): Calcd for C<sub>20</sub>H<sub>32</sub>B<sub>1</sub>O<sub>4</sub> [M+H]<sup>+</sup>: 347.2394, Found: 347.2377; Specific Rotation: [α]<sub>D</sub><sup>20</sup> +36.6 (*c* 0.56, CHCl<sub>3</sub>) for an enantiomerically enriched sample of 97:3 e.r. Enantiomeric purity was determined by HPLC analysis of the alcohol product after oxidation in comparison with authentic racemic material (97:3 e.r. shown; Chiralpak AD–H column, 99% hexanes, 1% *i*-PrOH, 0.3 mL/min, 220 nm).

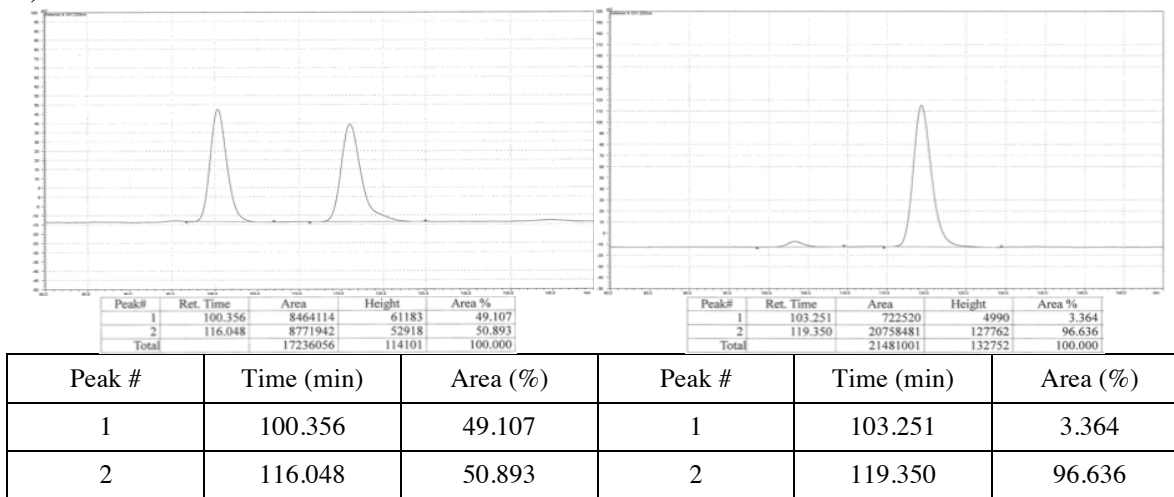

**Scheme 2.** Application to Enantioselective Synthesis of Heliespirone A and C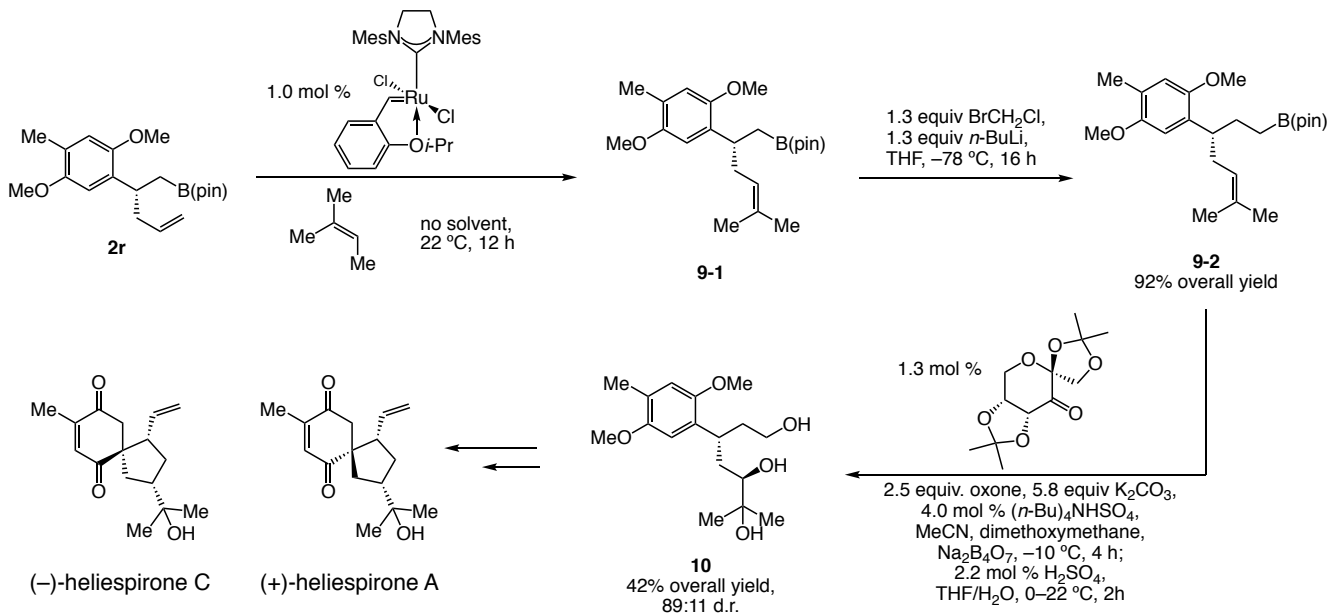

**(R)-2-(3-(2,5-Dimethoxy-4-methylphenyl)-6-methylhept-5-en-1-yl)-4,4,5,5-tetramethyl-1,3,2-**

**dioxaborolane (9-2):** Compound **2r** was converted to **9-2** by a two-step sequence olefin cross metathesis/homologation based on the reported procedures except Hoveyda-Grubbs catalyst 2<sup>nd</sup> generation was used in the cross metathesis.<sup>15</sup> IR (neat): 2977 (w), 2931 (w), 2854 (w), 1504 (m), 1466 (m), 1398 (m), 1372 (m), 1317 (m), 1208 (s), 1145 (m), 1049 (m), 968 (w)  $\text{cm}^{-1}$ ; <sup>1</sup>H NMR (400 MHz,  $\text{CDCl}_3$ ):  $\delta$  6.65 (1H, s), 6.62 (1H, s), 5.09–5.06 (1H, m), 3.77 (3H, s), 3.73 (3H, s), 3.02 (1H, app pent,  $J = 7.2$  Hz), 2.35–2.19 (2H, m), 1.81 (3H, s), 1.80–1.70 (1H, m), 1.68–1.56 (4H, m), 1.54 (3H, s), 1.21 (12H, s), 0.74–0.60 (2H, m); <sup>13</sup>C NMR (100 MHz,  $\text{CDCl}_3$ ):  $\delta$  151.9, 151.7, 132.1, 131.7, 124.2, 123.6, 114.5, 110.7, 82.9, 56.6, 56.2, 40.5, 33.8, 29.3, 25.9, 25.0, 24.9, 17.9, 16.2; HRMS (DART): Calcd for  $\text{C}_{23}\text{H}_{38}\text{B}_1\text{O}_4$   $[\text{M}+\text{H}]^+$ : 389.2863, Found: 389.2862; Specific Rotation:  $[\alpha]_{\text{D}}^{20} +18.0$  ( $c$  0.50,  $\text{CHCl}_3$ ).

**(3R,5R)-3-(2,5-Dimethoxy-4-methylphenyl)-6-methylheptane-1,5,6-triol (10):** Compound **9-2** was converted to **10** by a two step sequence enantioselective epoxidation/hydrolysis based on the reported procedures except the oxidation was performed with 2.5 equiv of oxone.<sup>16</sup> The spectroscopic data match those reported previously.<sup>17</sup> <sup>1</sup>H NMR (400 MHz,  $\text{CDCl}_3$ ):  $\delta$  6.72 (1H, s), 6.66 (1H, s), 3.80 (3H, s), 3.79 (3H, s), 3.58–3.53 (2H, m), 3.46–3.35 (2H, m), 2.20 (3H, s), 2.12–2.01 (1H, m), 1.88–1.84 (1H, m), 1.74–1.59 (2H, m), 1.21 (3H, s), 1.15 (3H, s); HRMS (DART): Calcd for  $\text{C}_{17}\text{H}_{28}\text{O}_5$   $[\text{M}]^+$ : 312.1937, Found: 312.1939. Specific Rotation:  $[\alpha]_{\text{D}}^{20} +23.4$  ( $c$  0.23,  $\text{CHCl}_3$ ). Literature precedence:  $[\alpha]_{\text{D}}^{13} +29.2$  ( $c$  0.10,  $\text{CH}_2\text{Cl}_2$ ).<sup>17</sup>

(15) For cross-metathesis, see: Chatterjee, A. K., Sanders, D. P. & Grubbs, R. H. *Org. Lett.* **4**, 1939–1942 (2002). For homologation, see: Kliman, L. T., Mlynarski, S. N. & Morken, J. P. *J. Am. Chem. Soc.* **131**, 13210–13211 (2009).

(16) Wang, Z.-X., Tu, Y., Frohn, M., Zhang, J.-R. & Shi, Y. *J. Am. Chem. Soc.* **119**, 11224–11235 (1997).

(17) Huang, C. & Liu, B. *Chem. Commun.* **46**, 5280–5282 (2010).

## 8. Additional Studies Regarding the Effect of Concentration Changes on Enantioselectivity

**Scheme 3.** Additional Studies Regarding the Effect of Aryl Olefin or Allyl Electrophile Concentration on Enantioselectivity

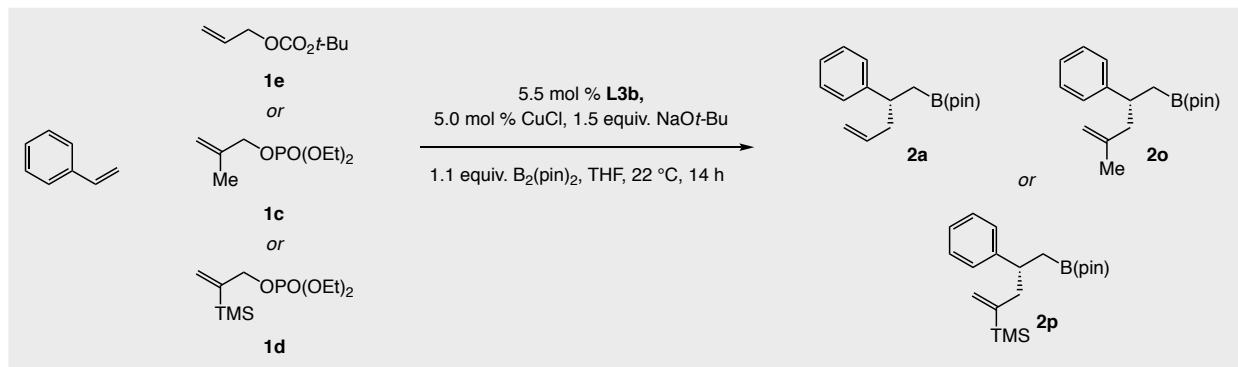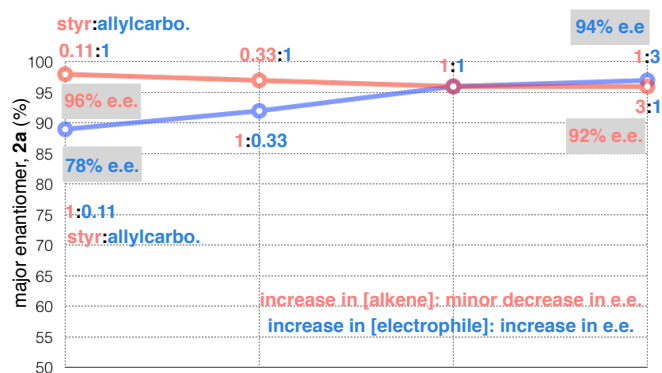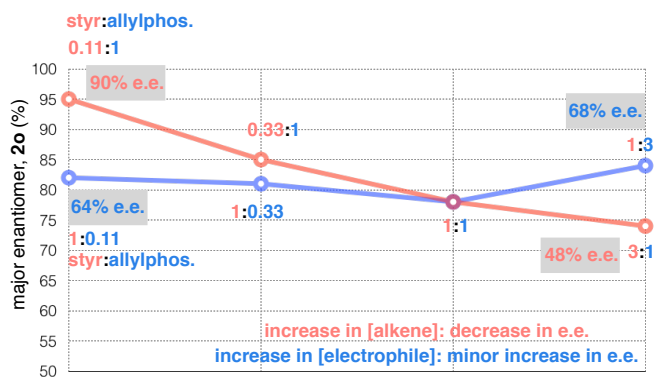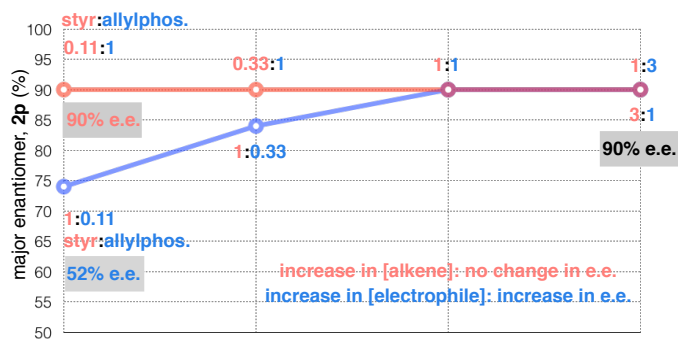

## 9. Study of the Possibility of Epimerization through Isotopic Labeling

**Scheme 4.** Synthesis of *E* and *Z* Deuterium-Labeled Aryl Olefins

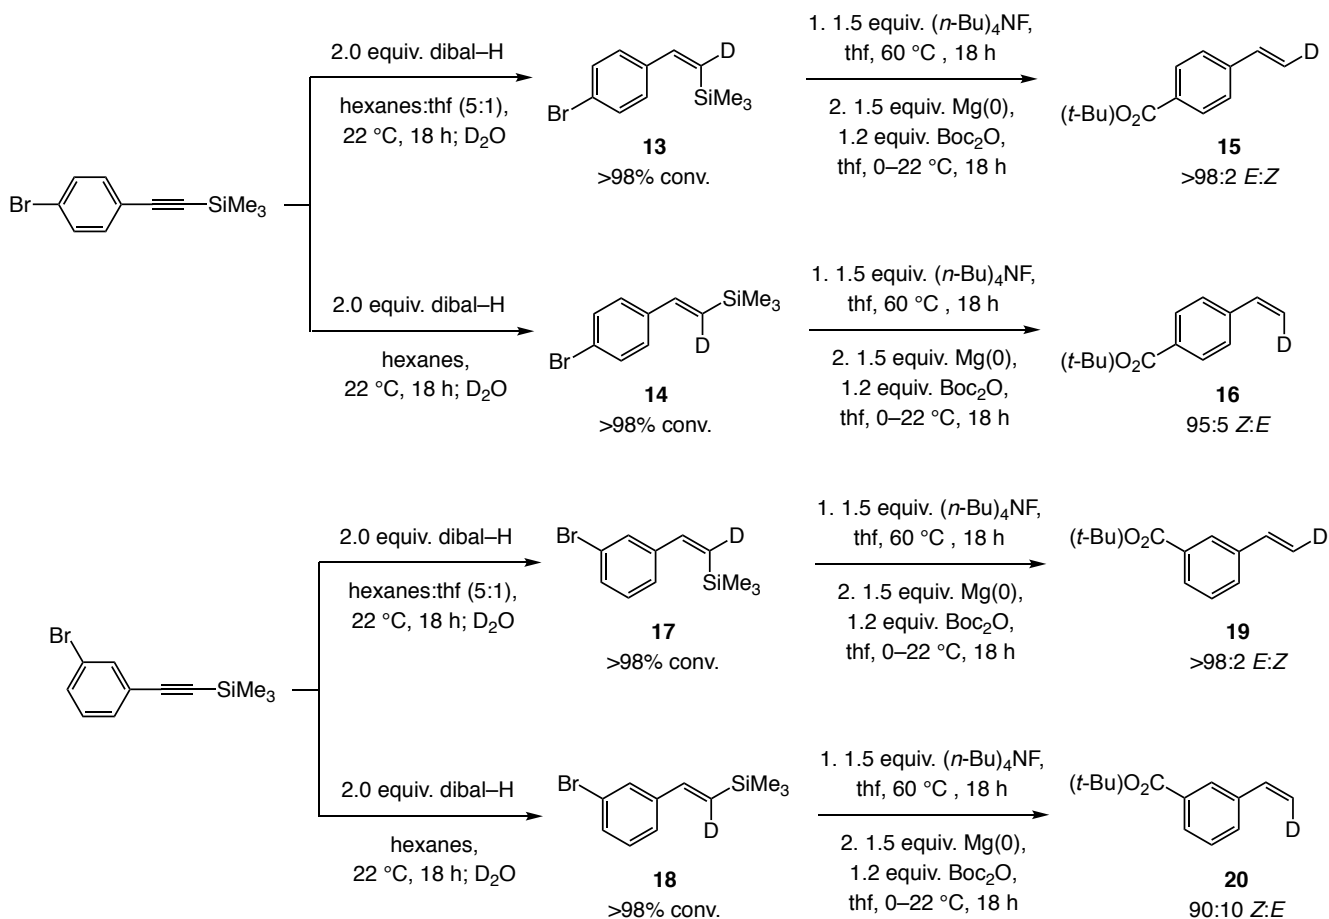

**(*Z*)-(2-(4-Bromophenyl)vinyl-1-*d*)trimethylsilane (13):** To a flame-dried round bottom flask equipped with a stir bar was added hexanes (20 mL) under N<sub>2</sub>, after which dibal-H (8.6 mL, 48 mmol, USE WITH CAUTION, PYROPHORIC) was added by a gas-tight syringe. The resulting mixture was allowed to cool to 0 °C, and a solution of trimethyl(4-bromophenylethynyl)silane (6.1 g, 24 mmol) in thf (4 mL) was added drop-wise by syringe. The mixture was allowed to stir for an additional 5 min at 0 °C and then warmed to 22 °C and allowed to stir for 23 h. The reaction was then quenched upon drop-wise addition of D<sub>2</sub>O (1.2 mL, 72 mmol) at 0 °C and allowed to stir for 1 h at 22 °C. The mixture was transferred to a separatory funnel and Rochelle's salt (50 mL) and a saturated solution of aqueous ammonium chloride (40 mL) were added. The layers were separated, and the aqueous layer was washed with Et<sub>2</sub>O (3 x 20 mL). The combined organic layers were dried over Na<sub>2</sub>SO<sub>4</sub> and concentrated in vacuo. The resulting yellow oil was purified by silica gel chromatography (100% pentane) and Kugelrohr distillation to afford **13**.

**(*E*)-(2-(4-Bromophenyl)vinyl-1-*d*)trimethylsilane (14):** This compound was prepared similarly to **13**, except 100% hexanes (24 mL) was used instead of using 16.7% thf.

**tert-Butyl-(*E*)-4-(vinyl-2-*d*)benzoate (15):** To a solution of **13** in thf (15 mL) was added (*n*Bu)<sub>4</sub>NF (1.0 M in thf, 8.25 mL, 8.25 mmol) at 22 °C under N<sub>2</sub>. The mixture was allowed to stir at 60 °C for 18

hours after which it was transferred to a separatory funnel; water (25 mL) was added and the layers separated. The aqueous layer was washed with Et<sub>2</sub>O (3x20 mL). The combined organic layers were dried over MgSO<sub>4</sub> and concentrated under reduced pressure. The resulting yellow oil was purified by Kugelrohr distillation to afford **(E)-1-Bromo-4-(vinyl-2-d)benzene** which was converted to **15** following the previously reported procedure.<sup>10</sup> The resulting colorless oil was purified by silica gel chromatography and Kugelrohr distillation to afford **15** as colorless liquid (200 mg, >98% D, >98% E). IR (neat): 2979 (w), 1709 (s), 1608 (w), 1393 (m), 1291 (s), 1162 (s), 1112 (s), 1066 (s), 1067 (m), 865 (s), 771 (s), 702 (m) cm<sup>-1</sup>; <sup>1</sup>H NMR (CDCl<sub>3</sub>, 400 MHz): δ 7.97–7.94 (2H, m), 7.43 (2H, d, *J* = 8.4 Hz), 6.74 (1H, d, *J* = 17.6 Hz), 5.82 (1H, d, *J* = 17.6 Hz), 1.60 (9H, s); <sup>13</sup>C NMR (CDCl<sub>3</sub>, 100 MHz): δ 165.6, 141.5, 136.1, 131.3, 129.8, 127.2, 126.0, 121.4, 115.9 (t, *J* = 24.3 Hz), 81.0, 28.3; HRMS (DART): Calcd for C<sub>13</sub>H<sub>16</sub>DO<sub>2</sub> [M+H]<sup>+</sup>: 206.1291; Found: 206.1300.

**tert-Butyl-(Z)-4-(vinyl-2-d)benzoate (16):** To a solution of **14** in thf (15 mL) was added (*n*Bu)<sub>4</sub>NF (1.0 M in thf, 8.25 mL, 8.25 mmol) at 22 °C under N<sub>2</sub>. The mixture was allowed to stir at 60 °C for 18 h after which it was transferred to a separatory funnel, water (25 mL) was added and the layers separated. The aqueous layer was washed with Et<sub>2</sub>O (3x20 mL). The combined organic layers were dried over MgSO<sub>4</sub> and concentrated under reduced pressure. The resulting yellow oil was purified by Kugelrohr distillation to afford **(Z)-1-Bromo-4-(vinyl-2-d)benzene** which was converted to **16** following the previously reported procedure.<sup>10</sup> The product was purified by silica gel chromatography and Kugelrohr distillation to afford **16** as colorless liquid (199.4 mg, >98%D, 95:5 Z:E). IR (neat): 2977 (w), 1707 (s), 1607 (w), 1367 (m), 1287 (s), 1161 (s), 1104 (s), 1016 (m), 848 (s), 774 (s), 706 (s), 438 (w) cm<sup>-1</sup>; <sup>1</sup>H NMR (CDCl<sub>3</sub>, 400 MHz): δ 7.94 (2H, d, *J* = 8.4 Hz), 7.43 (2H, d, *J* = 8.4 Hz), 6.75–6.79 (1H, m), 5.35 (1H, *J* = 10.4 Hz), 1.60 (9H, s); <sup>13</sup>C NMR (CDCl<sub>3</sub>, 100 MHz): δ 165.7, 141.5, 136.2, 131.3, 129.8, 126.1, 116.0 (t, *J* = 23.5 Hz), 81.0, 28.3 HRMS (DART): Calcd for C<sub>13</sub>H<sub>16</sub>DO<sub>2</sub> [M+H]<sup>+</sup>: 206.1291; Found: 206.1293

**tert-Butyl-4-((1S,2R)-1-(4,4,5,5-tetramethyl-1,3,2-dioxaborolan-2-yl)pent-4-en-2-yl-1-d)benzoate (2k-d from 15):** Following the representative procedure except **L3b** and 1:3 alkene:phosphate used, **2k-d** was obtained as colorless oil (60:40 d.r., determined from <sup>1</sup>H NMR of the product after oxidation). IR (neat): 2977 (w), 2929 (w), 1711 (s), 1609 (w), 1391 (m), 1364 (s), 1312 (s), 1288 (s), 1255 (m), 1164 (s), 1143 (s), 1112 (s), 850 (m) cm<sup>-1</sup>; <sup>1</sup>H NMR (CDCl<sub>3</sub>, 400 MHz): δ 7.88 (2H, d, *J* = 8.0 Hz), 7.24 (2H, d, *J* = 8.0 Hz), 5.63 (1H, ddt, *J* = 17.2, 10.4, 6.8 Hz), 4.96–4.90 (2H, m), 2.99 (1H, app q, *J* = 7.2 Hz), 2.35 (2H, t, *J* = 7.0 Hz), 1.58 (9H, s), 1.22 (1H, br s), 1.12 (6H, s), 1.11 (2.46H, s, minor), 1.10 (3.54H, s, major); <sup>13</sup>C NMR (CDCl<sub>3</sub>, 150 MHz): δ 166.1, 151.95 (minor), 151.93 (major), 136.8, 129.8, 129.5, 127.4, 116.5, 83.2, 80.8, 43.51 (major), 43.48 (minor), 41.4, 28.4, 24.9, 24.80 (minor), 24.79 (major); HRMS (DART): Calcd for C<sub>22</sub>H<sub>33</sub>D<sub>1</sub>B<sub>1</sub>O<sub>4</sub> [M+H]<sup>+</sup>: 374.2613; Found: 374.2620.

**tert-Butyl-4-((1R,2R)-1-(4,4,5,5-tetramethyl-1,3,2-dioxaborolan-2-yl)pent-4-en-2-yl-1-d)benzoate (2k-d from 16):** Following the representative procedure except **L3b** and 1:3 alkene:phosphate used, **2k-d** was obtained as colorless oil (35:65 d.r., determined from <sup>1</sup>H NMR of the product after oxidation). IR (neat): 2977 (w), 2929 (w), 1711 (s), 1609 (w), 1391 (m), 1364 (s), 1312 (s), 1288 (s), 1255 (m), 1164 (s), 1143 (s), 1112 (s), 850 (s) cm<sup>-1</sup>; <sup>1</sup>H NMR (CDCl<sub>3</sub>, 400 MHz): δ 7.88 (2H, d, *J* = 8.0 Hz), 7.24 (2H, d, *J* = 8.0 Hz), 5.63 (1H, ddt, *J* = 17.2, 10.4, 6.8 Hz), 4.96–4.90 (2H, m), 2.99 (1H,



app q,  $J = 7.5$  Hz), 2.35 (2H, t,  $J = 7.0$  Hz), 1.58 (9H, s), 1.22 (1H, br s), 1.12 (6H, s), 1.11 (3.76H, s, major), 1.10 (2.24H, s, minor);  $^{13}\text{C}$  NMR ( $\text{CDCl}_3$ , 150 MHz):  $\delta$  166.1, 151.95 (major), 151.93 (minor), 136.8, 129.8, 129.5, 127.4, 116.5, 83.2, 80.8, 43.51 (minor), 43.48 (major), 41.4, 28.4, 24.9, 24.80 (major), 24.79 (minor); HRMS (DART): Calcd for  $\text{C}_{22}\text{H}_{33}\text{D}_1\text{B}_1\text{O}_4$   $[\text{M}+\text{H}]^+$ : 374.2613; Found: 374.2620.

**tert-Butyl-(E)-3-(vinyl-2-d)benzoate (19, substrate for synthesis of anti-2g-d):** Following the procedure for preparation of **15** except trimethyl(3-bromophenylethynyl)silane was used. The product was obtained as >98:2 *E:Z*. IR (neat): 2977 (w), 1710 (s), 1367 (m), 1297 (s), 1254 (m), 1157 (s), 1079 (m), 1036 (m), 999 (m), 883 (m), 785 (w), 753 (s), 408 (w)  $\text{cm}^{-1}$ ;  $^1\text{H}$  NMR (400 MHz,  $\text{CDCl}_3$ ):  $\delta$  8.02 (1H, s), 7.87 (1H, dt,  $J = 7.6$ , 1.2 Hz), 7.56–7.55 (1H, m), 7.35 (1H, t,  $J = 7.2$  Hz), 6.75 (1H, d,  $J = 17.6$  Hz), 5.80 (1H, d,  $J = 17.6$  Hz), 1.60 (9H, s);  $^{13}\text{C}$  NMR (100 MHz,  $\text{CDCl}_3$ ):  $\delta$  165.7, 137.7, 136.1, 132.4, 130.1, 128.8, 128.5, 127.3, 114.7 (t,  $J = 24.3$  Hz), 81.1, 28.3; HRMS (DART): Calcd for  $\text{C}_{13}\text{H}_{16}\text{D}_1\text{O}_2$   $[\text{M}+\text{H}]^+$ : 206.1291, Found: 206.1297.

**tert-Butyl-(Z)-3-(vinyl-2-d)benzoate (20, substrate for synthesis of syn-2g-d):** Following the procedure for preparation of **16** except trimethyl(3-bromophenylethynyl)silane was used. The product was obtained as 90:10 *Z:E*. IR (neat): 2977 (w), 1711 (s), 1367 (m), 1291 (s), 1277 (s), 1156 (s), 1109 (m), 1082 (m), 848 (m), 818 (m), 755 (m), 697 (m), 406 (w)  $\text{cm}^{-1}$ ;  $^1\text{H}$  NMR (400 MHz,  $\text{CDCl}_3$ ):  $\delta$  8.03 (1H, t,  $J = 2$  Hz), 7.88 (1H, dt,  $J = 7.6$ , 1.6 Hz), 7.57–7.55 (1H, m), 7.37 (1H, t,  $J = 7.6$  Hz), 6.74 (1H, dt,  $J = 10.8$ , 2.4 Hz), 5.29 (1H, d,  $J = 10.8$  Hz), 1.61 (9H, s);  $^{13}\text{C}$  NMR (100 MHz,  $\text{CDCl}_3$ ):  $\delta$  165.7, 137.7, 136.1, 132.4, 130.1, 128.7, 128.5, 127.3, 114.6 (t,  $J = 23.5$  Hz), 81.1, 28.2; HRMS (DART): Calcd for  $\text{C}_{13}\text{H}_{16}\text{D}_1\text{O}_2$   $[\text{M}+\text{H}]^+$ : 206.1291, Found: 206.1302.

**tert-Butyl-3-((1S,2R)-1-(4,4,5,5-tetramethyl-1,3,2-dioxaborolan-2-yl)pent-4-en-2-yl-1-d)benzoate (anti-2g-d):** IR (neat): 2977 (m), 2927 (w), 1713 (s), 1479 (w), 1366 (s), 1316 (s), 1295 (s), 1161 (s), 1145 (s), 1111 (m), 755 (m), 697 (w)  $\text{cm}^{-1}$ ;  $^1\text{H}$  NMR (400 MHz,  $\text{CDCl}_3$ ):  $\delta$  7.83 (1H, t,  $J = 1.8$  Hz), 7.78 (1H, dt,  $J = 8.0$ , 1.2 Hz), 7.37 (1H, dt,  $J = 7.6$ , 1.2 Hz), 7.30 (1H, t,  $J = 7.6$  Hz), 5.66 (1H, ddt,  $J = 17.0$ , 10.0, 7.2 Hz), 4.99–4.90 (2H, m), 2.99 (1H, q,  $J = 7.2$  Hz), 2.44–2.32 (2H, m), 1.59 (9H, s), 1.22 (1H, d,  $J = 7.6$  Hz), 1.11 (6H, s), 1.10 (6H, s);  $^{13}\text{C}$  NMR (100 MHz,  $\text{CDCl}_3$ ):  $\delta$  166.2, 147.1, 137.0, 131.9, 131.6, 128.8, 128.1, 127.2, 116.4, 83.2, 80.9, 43.4, 41.3, 28.4, 24.9, 24.8; HRMS (DART): Calcd for  $\text{C}_{22}\text{H}_{33}\text{D}_1\text{B}_1\text{O}_4$   $[\text{M}+\text{H}]^+$ : 374.2613, Found: 374.2614. Enantiomeric purity was determined by HPLC analysis in comparison with authentic racemic material (87:13 e.r. shown; Chiralcel OZ–H column, 100% hexanes, 0.3 mL/min, 220 nm).

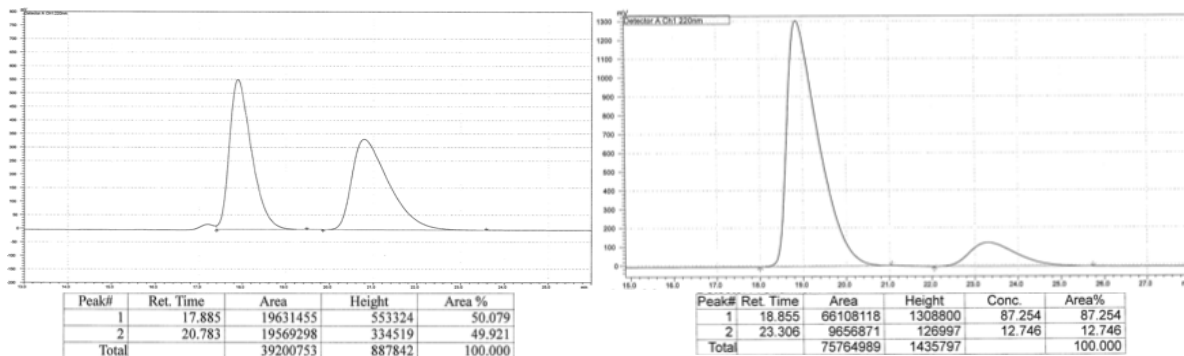

| Peak # | Time (min) | Area (%) | Peak # | Time (min) | Area (%) |
|--------|------------|----------|--------|------------|----------|
| 1      | 17.885     | 50.079   | 1      | 18.855     | 87.254   |
| 2      | 20.783     | 49.921   | 2      | 23.306     | 12.746   |

**tert-Butyl-3-((1*R*,2*R*)-1-(4,4,5,5-tetramethyl-1,3,2-dioxaborolan-2-yl)pent-4-en-2-yl-1-*d*)benzoate (syn-2*g-d*):** IR (neat): 2977 (m), 2927 (w), 1713 (s), 1479 (w), 1366 (s), 1316 (s), 1295 (s), 1161 (s), 1145 (s), 1111 (m), 755 (m), 697 (w)  $\text{cm}^{-1}$ ;  $^1\text{H}$  NMR (400 MHz,  $\text{CDCl}_3$ ):  $\delta$  7.83 (1H, t,  $J = 1.6$  Hz), 7.78 (1H, dt,  $J = 7.6, 1.2$  Hz), 7.37 (1H, dt,  $J = 8, 1.6$  Hz), 7.30 (1H, t,  $J = 7.6$  Hz), 5.66 (1H, ddt,  $J = 17.0, 10.0, 7.2$  Hz), 4.99–4.91 (2H, m), 2.99 (1H, q,  $J = 7.2$  Hz), 2.44–2.32 (2H, m), 1.59 (9H, s), 1.11 (6H, s), 1.10 (6H, s), 1.07 (1H, d,  $J = 9.2$  Hz);  $^{13}\text{C}$  NMR (100 MHz,  $\text{CDCl}_3$ ):  $\delta$  166.2, 147.1, 137.0, 131.9, 131.6, 128.8, 128.1, 127.2, 116.5, 83.2, 80.9, 43.4, 41.3, 28.4, 24.9, 24.8; HRMS (DART): Calcd for  $\text{C}_{22}\text{H}_{33}\text{D}_1\text{B}_1\text{O}_4$   $[\text{M}+\text{H}]^+$ : 374.2613, Found: 374.2614. Enantiomeric purity was determined by HPLC analysis in comparison with authentic racemic material (87:13 e.r. shown; Chiralcel OZ–H column, 100% hexanes, 0.3 mL/min, 220 nm).

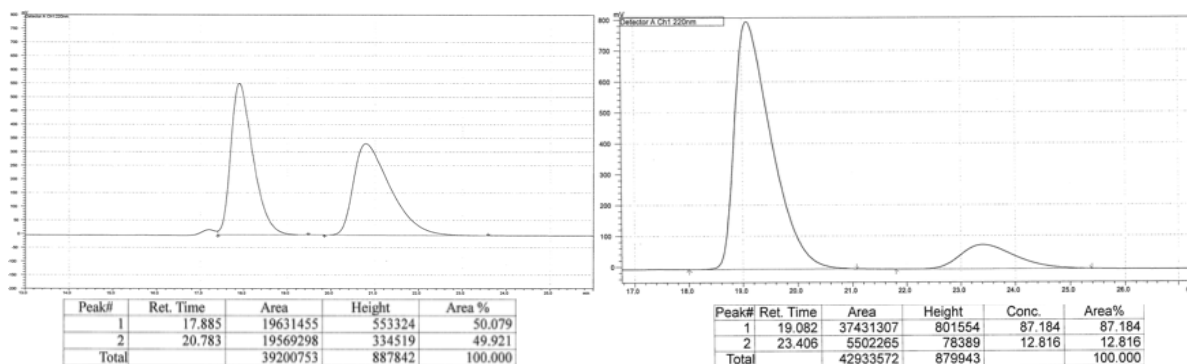

| Peak # | Time (min) | Area (%) | Peak # | Time (min) | Area (%) |
|--------|------------|----------|--------|------------|----------|
| 1      | 17.885     | 50.079   | 1      | 19.082     | 87.184   |
| 2      | 20.783     | 49.921   | 2      | 23.406     | 12.816   |

### Scheme 5. Synthesis of *E* and *Z* Deuterium-Labeled Aryl Olefins

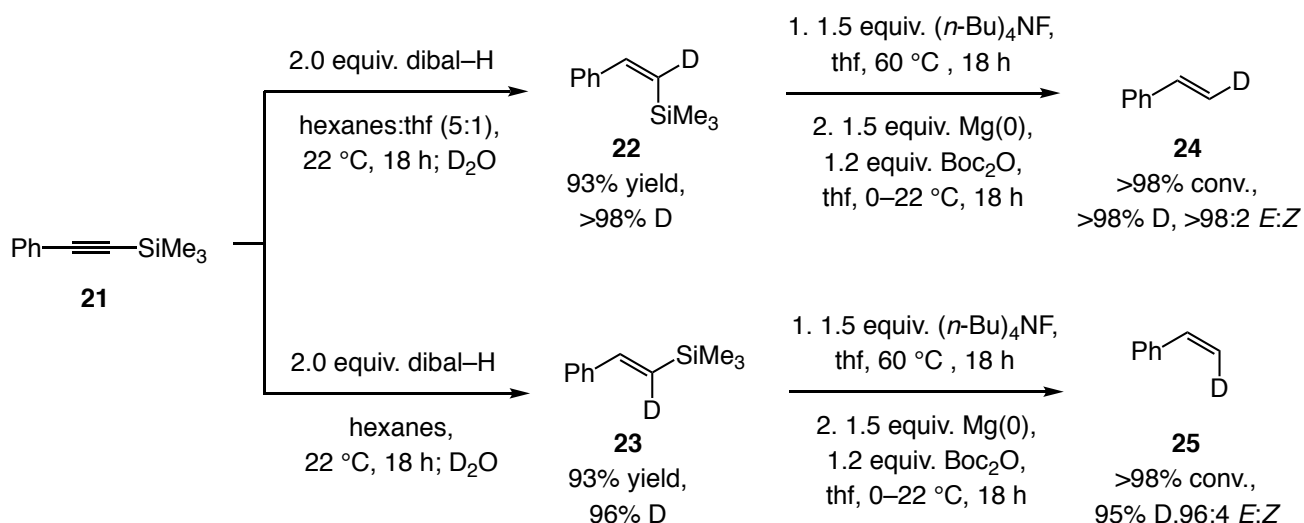

**(Z)-Trimethyl(2-phenylvinyl-1-*d*)silane (22):** To a flame-dried round bottom flask equipped with a stir bar was added hexanes (20 mL) and thf (4 mL) under N<sub>2</sub> after which dibal-H (8.6 mL, 48 mmol, USE CAUTION, PYROPHORIC) was added through a gas tight syringe. The mixture was allowed to cool to 0 °C (ice/water bath) and trimethyl(phenylethynyl)silane (4.8 mL, 24 mmol) was added by syringe drop-wise. The mixture was allowed to stir for an additional 5 min at 0 °C and then warm to 55 °C and stir for 23 h. The reaction was quenched upon drop-wise addition of D<sub>2</sub>O (0.8 mL, 48 mmol) at 0 °C and stir for additional 1 h at 22 °C. The mixture was transferred to a separatory funnel after which Rochelle's salt (30 ml) and a saturated solution of aqueous ammonium chloride (30 ml) were added to separate the layers. The aqueous layer was washed with Et<sub>2</sub>O (3 x 20 mL). The combined organic layers were dried over Na<sub>2</sub>SO<sub>4</sub> and concentrated. The resulting yellow oil was purified by silica gel chromatography (100% pentane) and Kugelrohr distillation to afford **22** as colorless liquid (4.0 g, 93%, >98% D). IR (neat): 2954 (w), 2897 (w), 1590 (w), 1569 (w), 1491 (w), 1247 (m), 1073 (w), 833 (s), 755 (s), 695 (s), 619 (m), 486 (m), 458 (w) cm<sup>-1</sup>; <sup>1</sup>H NMR (CDCl<sub>3</sub>, 400 MHz): 7.40–7.21 (6H, m), 0.06 (9H, s); <sup>13</sup>C NMR (CDCl<sub>3</sub>, 100 MHz): δ 146.6, 128.4, 128.3, 128.0, 127.9, 127.5, 0.3; HRMS (DART): Calcd for C<sub>11</sub>H<sub>15</sub>DSi [M+H]<sup>+</sup>: 177.1084; Found: 177.1097.

**(E)-Trimethyl(2-phenylvinyl-1-*d*)silane (23):** Prepared similarly to **22**, 100% hexanes was used instead of using 16.7% thf to afford **S7** (4.0 g, 93%, 96% D) as a colorless liquid. IR (neat): 3025 (w), 2954 (w), 1594 (w), 1570 (w), 1494 (w), 1297 (s), 1082 (m), 922 (w), 834 (s), 754 (s), 692 (s), 485 (w) cm<sup>-1</sup>; <sup>1</sup>H NMR (CDCl<sub>3</sub>, 400 MHz): 7.47–7.41 (2H, m), 7.36–7.13 (3H, m), 6.89–6.85 (1H, m), 0.16 (9H, s); <sup>13</sup>C NMR (CDCl<sub>3</sub>, 100 MHz): δ 143.7, 128.7, 128.4, 128.1, 127.9, 126.5, 125.6, -1.1, -1.6; HRMS (DART): Calcd for C<sub>11</sub>H<sub>15</sub>DSi [M+H]<sup>+</sup>: 177.1084; Found: 177.1092.

**trans-Styrene-(β)-*d* (24):** To a solution of (Z)-trimethyl(2-phenylvinyl-1-*d*)silane (2.5 g, 14 mmol) in thf (15 mL) was added (*n*-Bu)<sub>4</sub>NF (21 mL of 1M in thf) at 22 °C under N<sub>2</sub>. The mixture was allowed to stir at 60 °C for 18 h, after which it was transferred to a separatory funnel. Water (25 mL) was added and the layers separated. The aqueous layer was washed with Et<sub>2</sub>O (3 x 20 mL). The combined organic layers were dried over MgSO<sub>4</sub> and concentrated under house vacuum. The resulting yellow oil was purified by Kugelrohr distillation to afford the product (>98% *E*, >98% D) as colorless liquid. The spectroscopic data match those reported previously.<sup>18</sup> <sup>1</sup>H NMR (CDCl<sub>3</sub>, 400 MHz): δ 7.45–7.23 (5H, m), 6.73 (1H, dt, *J* = 17.6, 1.6 Hz) 5.74 (1H, d, *J* = 17.6 Hz)

**cis-Styrene-(β)-*d* (25):** This compound was prepared similarly to *trans*-Styrene-(β)-*d*, starting from (*E*)-trimethyl(2-phenylvinyl-1-*d*)silane (2.5 g, 14 mmol) and TBAF (56 mL of 1 M in thf) for 18 hours. The product was obtained as colorless liquid (96% *Z*, 95% D). The spectroscopic data match those reported previously.<sup>21</sup> <sup>1</sup>H NMR (CDCl<sub>3</sub>, 400 MHz): δ 7.45–7.22 (5H, m), 6.72 (1H, dt, *J* = 10.9, 2.6 Hz), 5.23 (1H, d, *J* = 10.9 Hz)

**2-((1*R*,2*R*)-2,4-Diphenylpent-4-en-1-yl-1-*d*)-4,4,5,5-tetramethyl-1,3,2-dioxaborolane (anti-2*n-d*):** Following the representative procedure except **L3b** and 6:1 alkene:phosphate used. IR (neat): 2923 (m), 2854 (w), 1453 (w), 1351 (m), 1314 (m), 1214 (w), 1143 (s), 969 (m), 896 (w), 777 (m), 734 (m), 698 (s), 547 (w) cm<sup>-1</sup>; <sup>1</sup>H NMR (CDCl<sub>3</sub>, 600 MHz): δ 7.40–7.36 (2H, m), 7.33–7.29 (2H, m), 7.28–

(18) Kapeller, D., Barth, R., Mereiter, K. & Hammerschmidt, F. *J. Am. Chem. Soc.* **129**, 914–923 (2007).

7.19 (3H, m), 7.15–7.09 (3H, m), 5.15 (1H, d,  $J = 1.8$  Hz), 4.83 (1H,  $J = 1.2$  Hz), 2.95 (1H, q,  $J = 6.6$  Hz), 2.87 (1H, dd,  $J = 13.2, 6$  Hz), 2.73 (1H, dd,  $J = 12.6, 7.8$  Hz), 1.23 (1H, d,  $J = 6$ ), 1.07 (6H, s), 1.05 (6H, s);  $^{13}\text{C}$  NMR ( $\text{CDCl}_3$ , 150 MHz):  $\delta$  146.9, 146.8, 141.2, 128.4, 128.1, 127.6, 127.4, 126.6, 125.9, 114.5, 83.0, 45.7, 39.9, 24.9, 24.7; HRMS (DART): Calcd for  $\text{C}_{22}\text{H}_{27}\text{DBO}_2$   $[\text{M}+\text{H}]^+$ : 336.2245; Found: 336.2241. Enantiomeric purity was determined by HPLC analysis of the alcohol product after oxidation in comparison with authentic racemic material (89:11 e.r. shown; Chiralcel OZ–H column, 99% hexanes, 1% *i*-PrOH, 0.3 mL/min, 220 nm).

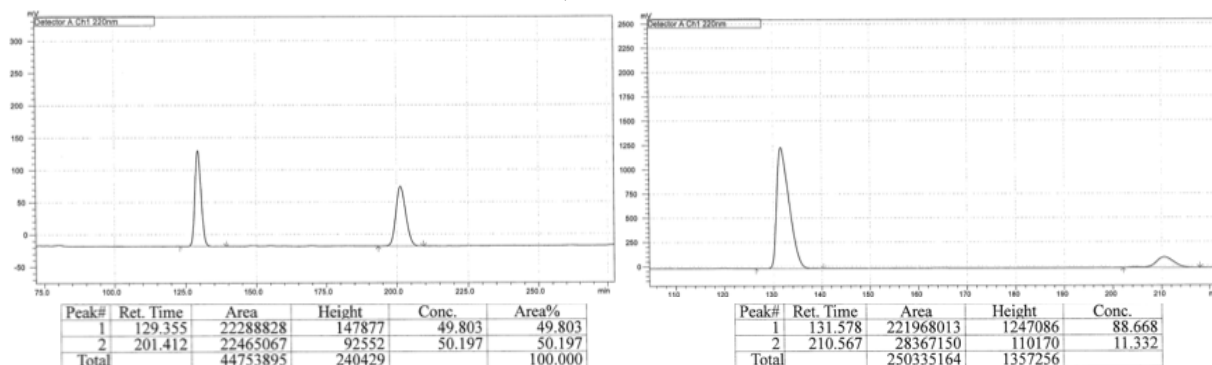

| Peak # | Time (min) | Area (%) | Peak # | Time (min) | Area (%) |
|--------|------------|----------|--------|------------|----------|
| 1      | 129.355    | 49.803   | 1      | 131.578    | 88.668   |
| 2      | 201.412    | 50.197   | 2      | 210.567    | 11.332   |

**2-((1S,2R)-2,4-Diphenylpent-4-en-1-yl-1-d)-4,4,5,5-tetramethyl-1,3,2-dioxaborolane (syn-2n-d):**

Following the representative procedure except **L3b** and 6:1 alkene:phosphate used. IR (neat): 2977 (w), 2924 (m), 2854 (w), 1194 (w), 1389 (s), 1316 (s), 1142 (s), 1110 (w), 970 (m), 895 (m), 859 (m), 777 (m), 697 (s), 521 (w)  $\text{cm}^{-1}$ ;  $^1\text{H}$  NMR ( $\text{CDCl}_3$ , 600 MHz):  $\delta$  7.42–7.35 (2H, m), 7.34–7.29 (2H, m), 7.28–7.19 (3H, m), 7.14–7.09 (3H, m), 5.15 (1H, d,  $J = 1.2$  Hz), 4.83 (1H, s), 2.96 (1H, q,  $J = 8.4$  Hz), 2.87 (1H, dd,  $J = 13.8, 6$  Hz), 2.73 (1H, dd,  $J = 13.2, 7.8$  Hz), 1.11 (1H, d,  $J = 9$  Hz), 1.08 (6H, s), 1.05 (6H, s);  $^{13}\text{C}$  NMR ( $\text{CDCl}_3$ , 150 MHz):  $\delta$  146.9, 146.8, 141.2, 128.4, 128.1, 127.6, 127.4, 126.7, 125.9, 114.5, 83.1, 45.6, 39.9, 24.9, 24.7; HRMS (DART): Calcd for  $\text{C}_{22}\text{H}_{27}\text{BO}_2$   $[\text{M}+\text{H}]^+$ : 336.2245; Found: 336.2245. Enantiomeric purity was determined by HPLC analysis of the alcohol product after oxidation in comparison with authentic racemic material (96:4 e.r. shown; Chiralcel OZ–H column, 99% hexanes, 1% *i*-PrOH, 0.3 mL/min, 220 nm).

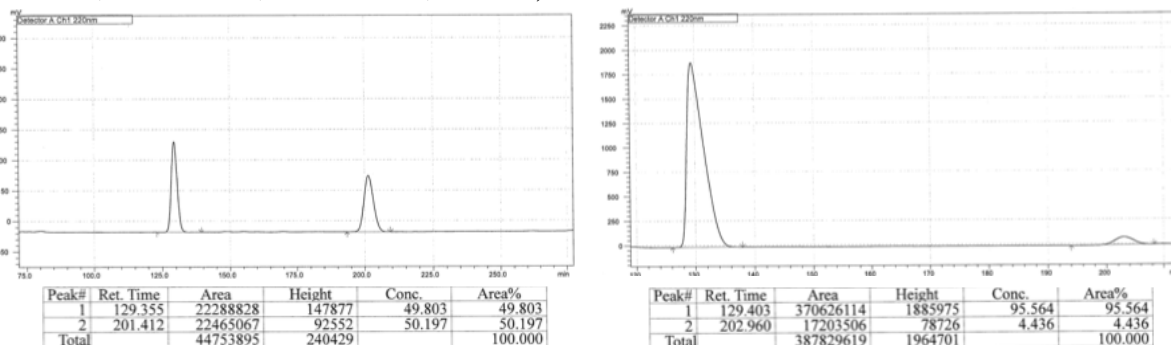

| Peak # | Time (min) | Area (%) | Peak # | Time (min) | Area (%) |
|--------|------------|----------|--------|------------|----------|
| 1      | 129.355    | 49.803   | 1      | 129.403    | 95.564   |
| 2      | 201.412    | 50.197   | 2      | 202.960    | 4.436    |

**(E)-1-(Trifluoromethyl)-4-(vinyl-2-d)benzene (substrate for synthesis of anti-2l-d):** Following the procedure for preparation of **24** except 1-[(Trimethylsilyl)ethynyl]-4-(trifluoromethyl)benzene was used. The product was obtained in 91:9 *E:Z* selectivity. The spectroscopic data match those reported previously.<sup>19</sup> <sup>1</sup>H NMR (400 MHz, CDCl<sub>3</sub>): δ 7.58 (2H, d, *J* = 8.4 Hz), 7.50 (2H, d, *J* = 8.4 Hz), 6.75 (1H, d, *J* = 17.6 Hz), 5.83 (1H, d, *J* = 17.6 Hz).

**(Z)-1-(Trifluoromethyl)-4-(vinyl-2-d)benzene (substrate for synthesis of syn-2l-d):** Following the procedure for preparation of **25** except 1-[(Trimethylsilyl)ethynyl]-4-(trifluoromethyl)benzene was use. The product was obtained as a 90:10 ratio of *Z:E* isomers. IR (neat): 2954 (m), 2925 (m), 2854 (m), 1325 (s), 1168 (m), 1129 (m), 1068 (m) cm<sup>-1</sup>; <sup>1</sup>H NMR (400 MHz, CDCl<sub>3</sub>): δ 7.57 (2H, d, *J* = 8.4 Hz), 7.48 (2H, d, *J* = 8.4 Hz), 6.72 (1H, dt, *J* = 11.2, 2.6 Hz), 5.36 (1H, d, *J* = 11.2 Hz); <sup>13</sup>C NMR (100 MHz, CDCl<sub>3</sub>): δ 141.1, 135.7, 129.8 (q, *J* = 32.4 Hz), 126.5, 125.6, 124.3 (q, *J* = 270.2 Hz), 116.3 (t, *J* = 23.6 Hz); HRMS (EI): Calcd for C<sub>9</sub>H<sub>7</sub>D<sub>1</sub>F<sub>3</sub> [M]<sup>+</sup>: 173.0563, Found: 173.0560.

**Scheme 6.** Deuterated Alkenes Examination (for *p*-CF<sub>3</sub> Styrene)

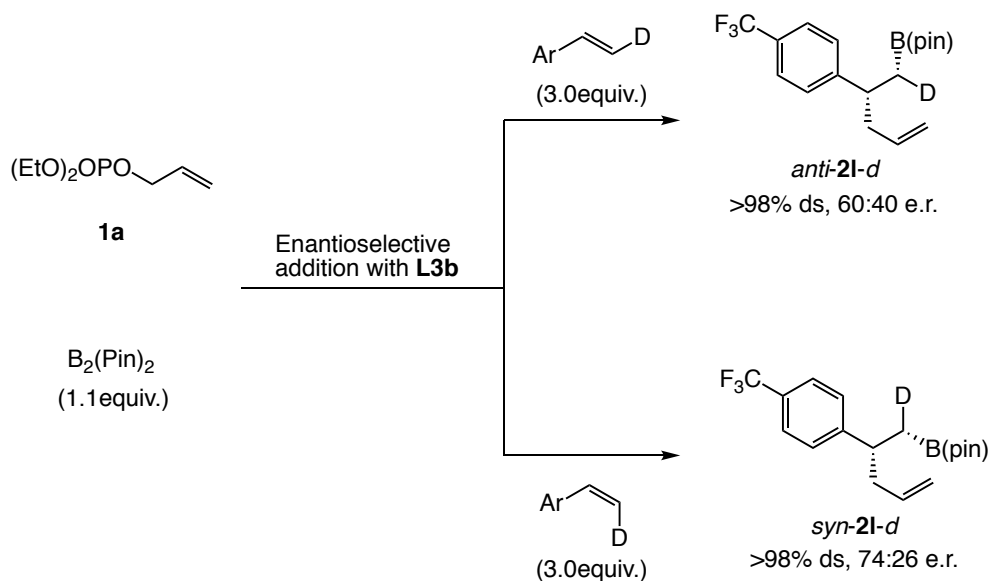

**4,4,5,5-Tetramethyl-2-((1S,2R)-2-(4-(trifluoromethyl)phenyl)pent-4-en-1-yl-1-d)-1,3,2-dioxaborolane (anti-2l-d):** Following the representative procedure except **L3b** used. IR (neat): 2979 (w), 2926 (w), 1359 (m), 1322 (s), 1162 (m), 1143 (m), 1120 (s), 1069 (m), 836 (m) cm<sup>-1</sup>; <sup>1</sup>H NMR (400 MHz, CDCl<sub>3</sub>): δ 7.51 (2H, d, *J* = 8.0 Hz), 7.31 (2H, d, *J* = 8.4 Hz), 5.64 (1H, ddt, *J* = 17.0, 10.2, 7.0 Hz), 4.98–4.92 (2H, m), 3.00 (1H, q, *J* = 7.1 Hz), 2.36 (2H, t, *J* = 7.2 Hz), 1.22 (1H, d, *J* = 1.2 Hz), 1.10 (6H, s), 1.08 (6H, s); <sup>13</sup>C NMR (100 MHz, CDCl<sub>3</sub>): δ 151.1, 136.5, 128.3 (q, *J* = 32.1 Hz), 127.9, 125.1 (q, *J* = 3.8 Hz), 124.5 (q, *J* = 270.4 Hz), 116.7, 83.3, 43.5, 41.4, 24.8, 24.7; HRMS (DART):

Calcd for  $C_{18}H_{24}D_1B_1F_3O_2 [M+H]^+$ : 342.1963, Found: 342.1961. Enantiomeric purity was determined by HPLC analysis in comparison with authentic racemic material (60:40 e.r. shown; Chiralcel OZ-H column, 100% hexanes, 0.3 mL/min, 220 nm).

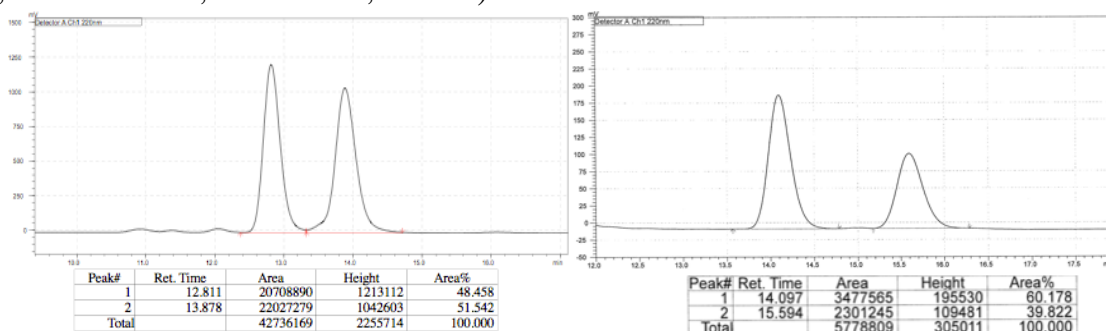

| Peak # | Time (min) | Area (%) | Peak # | Time (min) | Area (%) |
|--------|------------|----------|--------|------------|----------|
| 1      | 12.811     | 48.458   | 1      | 14.097     | 60.178   |
| 2      | 13.878     | 51.542   | 2      | 15.594     | 39.822   |

#### 4,4,5,5-Tetramethyl-2-((1R,2R)-2-(4-(trifluoromethyl)phenyl)pent-4-en-1-yl-1-d)-1,3,2-

**dioxaborolane (syn-2l-d):** Following the representative procedure except **L3b** used. IR (neat): 2979 (w), 2926 (w), 1359 (m), 1322 (s), 1162 (m), 1143 (m), 1120 (s), 1069 (m), 836 (m)  $cm^{-1}$ ;  $^1H$  NMR (400 MHz,  $CDCl_3$ ):  $\delta$  7.51 (2H, d,  $J = 8.4$  Hz), 7.31 (2H, d,  $J = 8.4$  Hz), 5.64 (1H, ddt,  $J = 17.2, 10.4, 6.8$  Hz), 4.98–4.91 (2H, m), 3.00 (1H, q,  $J = 7.9$  Hz), 2.36 (2H, t,  $J = 7.2$  Hz), 1.10 (6H, s), 1.09 (6H, s), 1.10–1.09 (1H, m);  $^{13}C$  NMR (100 MHz,  $CDCl_3$ ):  $\delta$  151.1, 136.5, 128.3 (q,  $J = 32.1$  Hz), 127.9, 125.1 (q,  $J = 3.8$  Hz), 124.5 (q,  $J = 270.2$  Hz), 116.7, 83.3, 43.5, 41.4, 24.8, 24.7; HRMS (DART): Calcd for  $C_{18}H_{24}D_1B_1F_3O_2 [M+H]^+$ : 342.1963, Found: 342.1961. Enantiomeric purity was determined by HPLC analysis in comparison with authentic racemic material (74:26 e.r. shown; Chiralcel OZ-H column, 100% hexanes, 0.3 mL/min, 220 nm).

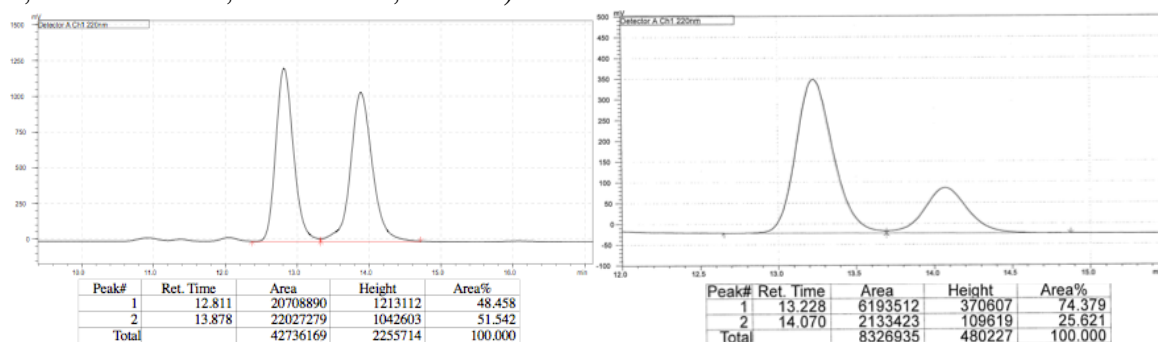

| Peak # | Time (min) | Area (%) | Peak # | Time (min) | Area (%) |
|--------|------------|----------|--------|------------|----------|
| 1      | 12.811     | 48.458   | 1      | 13.228     | 74.379   |
| 2      | 13.878     | 51.542   | 2      | 14.070     | 25.621   |

## 10. Study of the Possibility of Homolytic versus Heterolytic Cu–C Bond Cleavage

### Scheme 7. Synthesis of Cyclopropane **28**

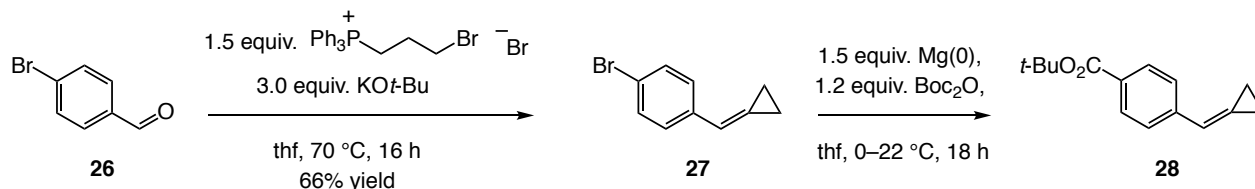

**1-Bromo-4-(cyclopropylidenemethyl)benzene (27):** Prepared from aldehyde **26** (purchased from Aldrich and used as received) by formerly reported procedure.<sup>20</sup> The spectroscopic data match those reported previously.<sup>21</sup> <sup>1</sup>H NMR (400 MHz, CDCl<sub>3</sub>): δ 7.46–7.42 (2H, m), 7.40–7.38 (2H, m), 6.70–6.68 (1H, m), 1.42–1.38 (2H, m), 1.20–1.16 (2H, m).

**tert-Butyl-4-(cyclopropylidenemethyl)benzoate (28):** Prepared from **27** according to the reported procedure.<sup>10</sup> IR (neat): 2977 (w), 1706 (s), 1606 (m), 1367 (m), 1307 (s), 1292 (s), 1254 (m), 1161 (s), 1107 (s), 1015 (m), 863 (m), 849 (m), 757 (m) cm<sup>-1</sup>; <sup>1</sup>H NMR (400 MHz, CDCl<sub>3</sub>): δ 7.96 (2H, d, *J* = 8.4 Hz), 7.55 (2H, d, *J* = 8.4 Hz), 6.79–6.78 (1H, m), 1.61 (9H, s), 1.48–1.42 (2H, m), 1.22–1.18 (2H, m); <sup>13</sup>C NMR (100 MHz, CDCl<sub>3</sub>): δ 165.8, 142.3, 130.1, 129.7, 127.6, 126.3, 117.9, 80.8, 28.3, 4.5, 0.8; HRMS (DART): Calcd for C<sub>15</sub>H<sub>19</sub>O<sub>2</sub> [M+H]<sup>+</sup>: 231.1391, Found: 231.1385.

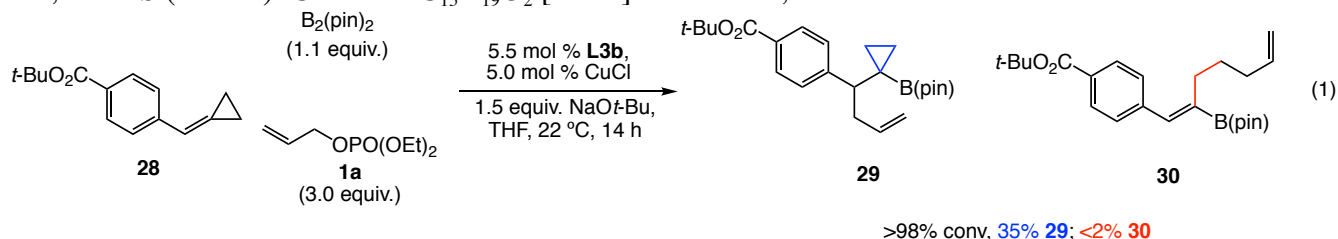

**tert-Butyl-(S)-4-(1-(1-(4,4,5,5-tetramethyl-1,3,2-dioxaborolan-2-yl)cyclopropyl)but-3-en-1-yl)benzoate (29):** IR (neat): 2976 (w), 2932 (m), 1710 (s), 1640 (w), 1440 (m), 1409 (m), 1290 (s), 1164 (s), 1140 (s), 1113 (s), 851 (s), 708 (m), 685 (m), 420 (w) cm<sup>-1</sup>; <sup>1</sup>H NMR (400 MHz, CDCl<sub>3</sub>): δ 7.88 (2H, d, *J* = 8), 7.38 (2H, d, *J* = 8), 5.69 (1H, ddt, *J* = 17.2, 9.6, 7.2), 5.00–4.95 (1H, m), 4.89–4.85 (1H, m), 2.75–2.71 (2H, m), 1.20 (1H, t, *J* = 7.8), 1.58 (9H, s), 1.20 (12H, s), 0.74 (1H, ddd, *J* = 9.2, 5.6, 3.2), 0.66 (1H, ddd, *J* = 8, 4.8, 2.8), 0.41 (1H, ddd, *J* = 8.4, 5.2, 3.2), 0.35 (1H, ddd, *J* = 8.4, 5.2, 3.2); <sup>13</sup>C NMR (100 MHz, CDCl<sub>3</sub>): δ 166.1, 150.3, 138.1, 129.8, 129.2, 128.5, 115.5, 83.1, 80.7, 53.4, 38.8, 28.4, 25.0, 24.5, 14.1, 10.2; HRMS (DART): Calcd for C<sub>24</sub>H<sub>36</sub>BO<sub>4</sub> [M+H]<sup>+</sup>: 399.2707, Found: 399.2723. Enantiomeric purity was determined by HPLC analysis of the alcohol product after oxidation in comparison with authentic racemic material (54:46 e.r. shown; Chiralcel OZ–H column, 99% hexanes, 1% *i*-PrOH, 0.3 mL/min, 220 nm).

(20) Evans, P. A., Inglesby, P. A. & Kilbride, K. *Org. Lett.* **15**, 1798–1801 (2013).

(21) Katritzky, A. R., Du, W., Levell, J. R. & Li, J. *J. Org. Chem.* **63**, 6710–6711 (1998).

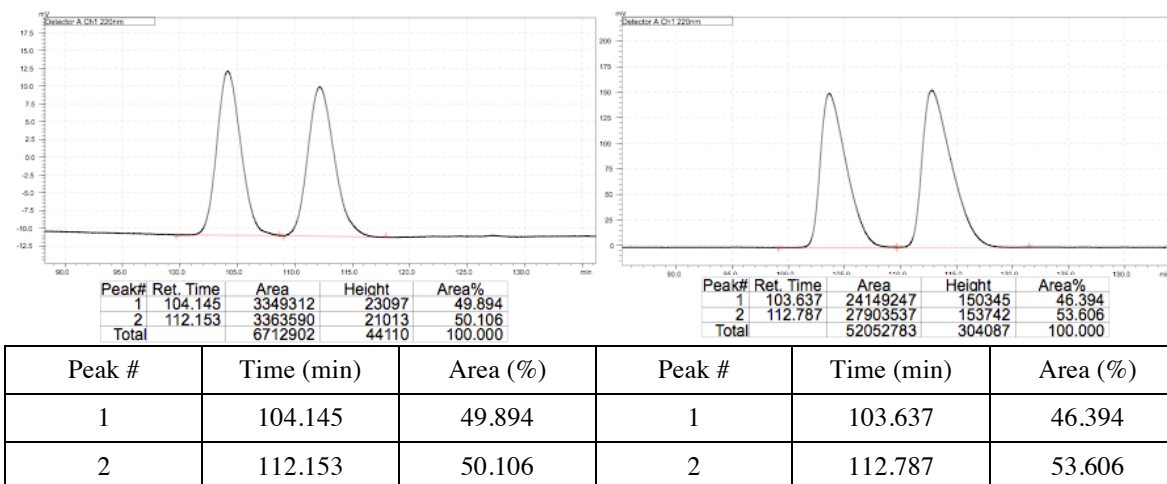

Additional support for cleavage/re-formation of the Cu–C bond is likely to be heterolytic in nature is that with diene **31** as the substrate, cyclopentenyl product **33** was not detected (Eq. 1).

**Scheme 8.** Synthesis of Diene **34**

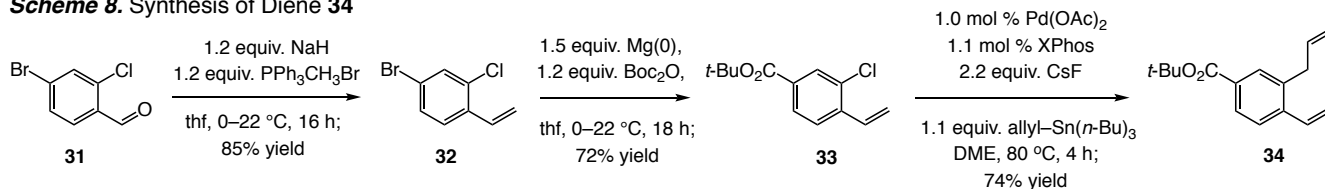

**4-Bromo-2-chloro-1-vinylbenzene (32):** Prepared from aldehyde **31** (purchased from Combi-Blocks and used as received) following the previously reported procedure.<sup>6</sup> IR (neat): 3089 (w), 3060 (w), 1579 (m), 1467 (s), 1371 (m), 1085 (m), 1049 (m), 985 (m), 917 (s), 867 (m), 812 (s)  $\text{cm}^{-1}$ ; <sup>1</sup>H NMR (400 MHz,  $\text{CDCl}_3$ ):  $\delta$  7.53 (1H, s), 7.42 (1H, d,  $J = 8.4$  Hz), 7.36 (1H, dd,  $J = 8.4, 1.6$  Hz), 7.02 (1H, dd,  $J = 17.4, 11.0$  Hz), 5.74 (1H, d,  $J = 17.2$  Hz), 5.41 (1H, d,  $J = 10.8$  Hz); <sup>13</sup>C NMR (100 MHz,  $\text{CDCl}_3$ ):  $\delta$  134.9, 133.9, 132.4, 132.3, 130.2, 127.7, 121.7, 117.3; HRMS (DART): Calcd for  $\text{C}_8\text{H}_7\text{Br}_1\text{Cl}_1$   $[\text{M}+\text{H}]^+$ : 216.9420, Found: 216.9427.

**tert-Butyl-3-chloro-4-vinylbenzoate (33):** Prepared from **32** according to the reported procedure.<sup>10</sup> IR (neat): 2978 (w), 2933 (w), 1716 (s), 1392 (m), 1368 (m), 1298 (s), 1258 (m), 1168 (s), 1118 (s), 773 (m), 849  $\text{cm}^{-1}$ ; <sup>1</sup>H NMR (400 MHz,  $\text{CDCl}_3$ ):  $\delta$  7.95 (1H, d,  $J = 1.6$  Hz), 7.83 (1H, dd,  $J = 8.5, 2.1$  Hz), 7.59 (1H, d,  $J = 8.0$  Hz), 7.11 (1H, dd,  $J = 17.6, 10.8$  Hz), 5.82 (1H, dd,  $J = 17.4, 0.6$  Hz), 5.48 (1H, dd,  $J = 11.0, 1.0$  Hz), 1.59 (9H, s); <sup>13</sup>C NMR (100 MHz,  $\text{CDCl}_3$ ):  $\delta$  164.5, 139.5, 133.1, 132.7, 132.5, 130.8, 127.8, 126.3, 118.6, 81.7, 28.3; HRMS (DART): Calcd for  $\text{C}_{13}\text{H}_{16}\text{Cl}_1\text{O}_2$   $[\text{M}+\text{H}]^+$ : 239.0839,

**tert-Butyl-3-allyl-4-vinylbenzoate (34):** Prepared from **33** according to the reported procedure.<sup>22</sup> IR (neat): 2977 (w), 2931 (w), 1709 (s), 1367 (m), 1293 (s), 1253 (s), 1163 (s), 1118 (s), 989 (m), 914 (s), 849 (s)  $\text{cm}^{-1}$ ; <sup>1</sup>H NMR (400 MHz,  $\text{CDCl}_3$ ):  $\delta$  7.82 (1H, dd,  $J = 7.8, 1.4$  Hz), 7.78 (1H, d,  $J = 1.6$  Hz), 7.53 (1H, d,  $J = 8.4$  Hz), 6.97 (1H, dd,  $J = 17.2, 11.2$  Hz), 6.01–5.91 (1H, m), 5.73 (1H, dd,  $J = 17.4, 1.4$  Hz), 5.39 (1H, dd,  $J = 11.2, 1.2$  Hz), 5.10–5.06 (1H, m), 5.00–4.94 (1H, m), 3.48 (2H, dt,  $J = 6.4, 1.6$  Hz), 1.59 (9H, s); <sup>13</sup>C NMR (100 MHz,  $\text{CDCl}_3$ ):  $\delta$  165.8, 140.9, 137.1, 136.4, 134.1, 131.4, 131.0,



127.8, 125.7, 117.5, 116.4, 81.0, 37.5, 28.3; HRMS (DART): Calcd for  $C_{16}H_{21}O_2 [M+H]^+$ : 244.1463, Found: 244.1471.

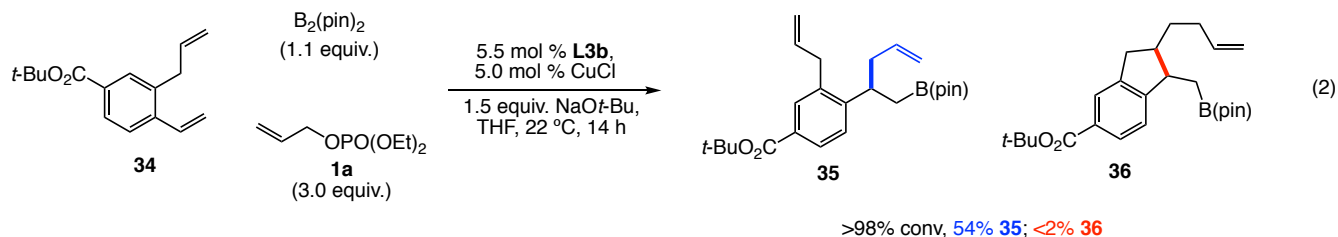

**tert-Butyl-(R)-3-allyl-4-(1-(4,4,5,5-tetramethyl-1,3,2-dioxaborolan-2-yl)pent-4-en-2-yl)benzoate**

**(35)**: IR (neat): 2977 (w), 2930 (w), 1711 (s), 1367 (s), 1298 (s), 1253 (m), 1166 (s), 1143 (s), 1121 (m), 912 (m), 849 (m)  $cm^{-1}$ ;  $^1H$  NMR (400 MHz,  $CDCl_3$ ):  $\delta$  7.78 (1H, dd,  $J = 8.0, 2.0$  Hz), 7.75 (1H, d,  $J = 2.0$  Hz), 7.27 (1H, d,  $J = 7.6$  Hz), 6.00 (1H, ddt,  $J = 17.0, 10.2, 6.2$  Hz), 5.70–5.60 (1H, m), 5.09–5.02 (2H, m), 4.99–4.91 (2H, m), 3.59–3.45 (2H, m), 3.32–3.24 (1H, m), 2.36–2.23 (2H, m), 1.58 (9H, s), 1.26–1.21 (1H, m), 1.08 (6H, s), 1.05 (6H, s), 1.12–1.05 (1H, m);  $^{13}C$  NMR (100 MHz,  $CDCl_3$ ):  $\delta$  166.2, 150.3, 137.6, 137.3, 136.8, 130.6, 129.5, 127.6, 126.4, 116.6, 116.1, 83.2, 80.7, 43.5, 37.4, 35.6, 28.4, 24.8, 24.77; HRMS (DART): Calcd for  $C_{25}H_{38}B_1O_4 [M+H]^+$ : 413.2863, Found: 413.2858.

### 11. Relative Reactivity of Allylphosphate and Allylphenyl Carbonate

In an  $N_2$ -filled glove box, an oven-dried 1-dram vial equipped with a stir bar was charged with bisphosphine **L3b** (3.7 mg, 0.0055 mmol),  $NaOt-Bu$  (14 mg, 0.15 mmol), and  $CuCl$  (0.50 mg, 0.0050 mmol), and THF was added (1.0 mL). The resulting solution was allowed to stir for one h under  $N_2$  at 22 °C, during which the solution turned light yellow. Bis(pinacolato)diboron (28 mg, 0.11 mmol) was added to the mixture, which immediately caused the solution to turn dark brown. At this time the mixture was charged with *para*-trifluoromethyl styrene (14.8  $\mu L$ , 0.10 mmol) followed by a solution containing labeled allylphosphate (**1a-d<sub>2</sub>**; 29.4 mg, 0.15 mmol), allylphenyl carbonate (**1e**; 26.7 mg, 0.15 mmol), and THF (0.50 mL). The vial was sealed with a cap and electrical tape before removal from the glove box, and the mixture was allowed to stir at 22 °C for 14 h, after which it was passed through a plug of silica gel (4 x 1 cm) and eluted with  $Et_2O$ . The volatiles were removed *in vacuo* to afford yellow oil, which was dissolved in  $CDCl_3$  for NMR analysis. Integration of the NMR signals provided the ratio of **2l** and **2l-d<sub>2</sub>**, which was calculated as an average of two runs.

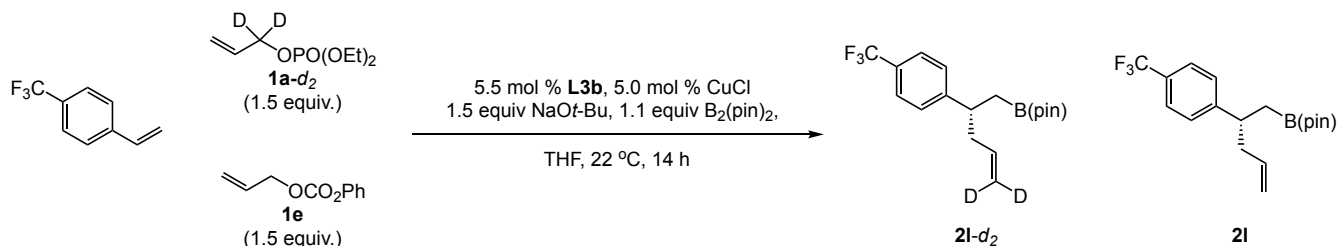

**Conclusion:** Allylphosphate is a considerably more effective electrophile compared to allylphenyl carbonate.

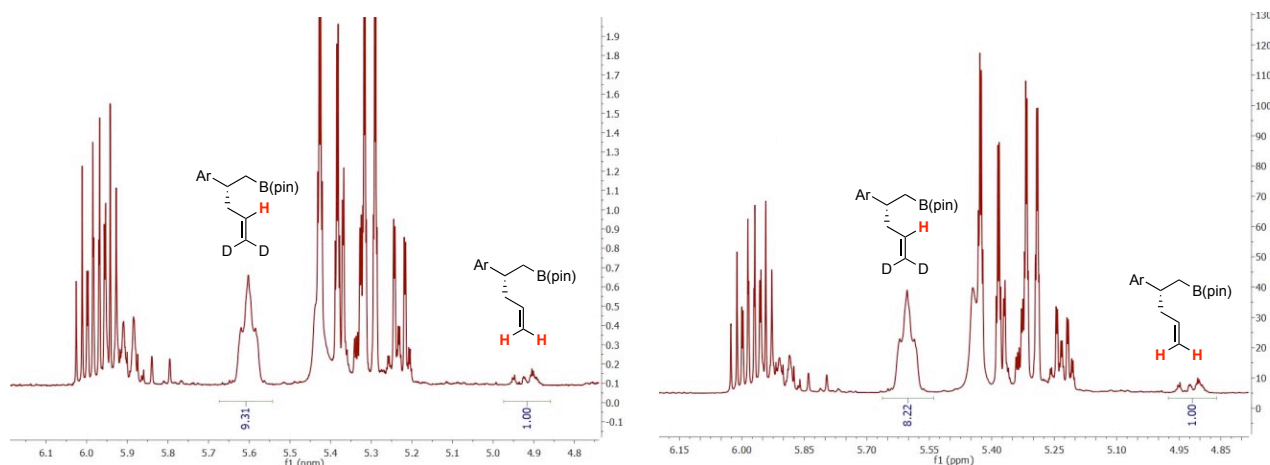

## 12. Relevance to Catalytic Processes that Involve Cu–H Additions

**(S)-N,N-dibenzyl-1,2,3,4-tetrahydronaphthalen-1-amine (11):** Following the previously reported procedure except 1:3 alkene:hydroxylamine was used. The spectroscopic data are consistent with those reported formerly.<sup>23</sup> <sup>1</sup>H NMR (400 MHz, CDCl<sub>3</sub>): δ 8.07 (1H, dt, *J* = 7.8, 1.2 Hz), 7.53 (4H, d, *J* = 7.3 Hz), 7.38 (4H, dd, *J* = 8.2, 6.9 Hz), 7.32–7.22 (3H, m), 7.17 (1H, tt, *J* = 7.3, 1.1 Hz), 7.09 (1H, d, *J* = 7.9 Hz), 4.00 (1H, dd, *J* = 10.2, 5.7 Hz), 3.87 (2H, d, *J* = 13.6 Hz), 3.54 (2H, d, *J* = 13.6 Hz), 2.91–2.66 (2H, m), 2.32–2.14 (1H, m), 2.06 (1H, dtt, *J* = 13.7, 5.6, 3.1 Hz), 1.85 (1H, tdd, *J* = 12.5, 10.1, 2.8 Hz), 1.76–1.58 (1H, m); Specific Rotation: [α]<sub>D</sub><sup>20</sup> –62.0 (*c* 1.00, CHCl<sub>3</sub>) for an enantiomerically enriched sample of 97:3 e.r. Enantiomeric purity was determined by HPLC analysis in comparison with authentic racemic material (97:3 e.r. shown; Chiralcel OJ–H column, 97% hexanes, 3% *i*-PrOH, 0.8 mL/min, 220 nm).

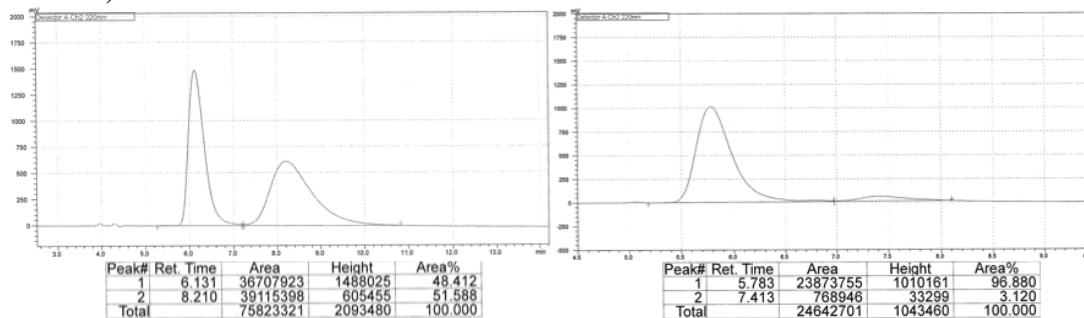

| Peak # | Time (min) | Area (%) | Peak # | Time (min) | Area (%) |
|--------|------------|----------|--------|------------|----------|
| 1      | 6.131      | 48.412   | 1      | 5.783      | 96.880   |
| 2      | 8.210      | 51.588   | 2      | 7.413      | 3.120    |

**(R)-2-(1-(3,4-Dihydroisoquinolin-2(1H)-yl)octyl)-2,3-dihydro-1H-naphtho[1,8-de][1,3,2]diazaborinine (12):** Following the previously reported procedure except 40 mol % of **8c** was used. The spectroscopic data match those reported previously.<sup>24</sup> <sup>1</sup>H NMR (400 MHz, CDCl<sub>3</sub>): δ 7.10–7.01 (7H, m), 6.88 (1H, d, *J* = 6.8 Hz), 6.00 (2H, dd, 6.8, 1.6 Hz), 5.66 (2H, bs), 3.81 (1H, d, *J* = 14.8

(23) Zhu, S., Niljianskul, N. & Buchwald, S. L. *J. Am. Chem. Soc.* **135**, 15746–15749 (2013).

(24) Nishikawa, D., Hirano, K. & Miura, M. *J. Am. Chem. Soc.* **137**, 15620–15623 (2015).

Hz), 3.55 (1H, d,  $J = 14.8$  Hz), 2.86–2.79 (1H, m), 2.73–2.55 (3H, m), 1.78 (1H, dd,  $J = 9.2, 4.4$  Hz), 1.71–1.64 (1H, m), 1.59–1.50 (1H, m), 1.46–1.37 (1H, m), 1.33–1.24 (9H, m), 0.89 (3H, t,  $J = 6.8$  Hz); Enantiomeric purity was determined by HPLC analysis in comparison with authentic racemic material (97:3 e.r. shown; Chiralcel OD–H column, 95% hexanes, 5% *i*-PrOH, 0.5 mL/min, 330 nm).

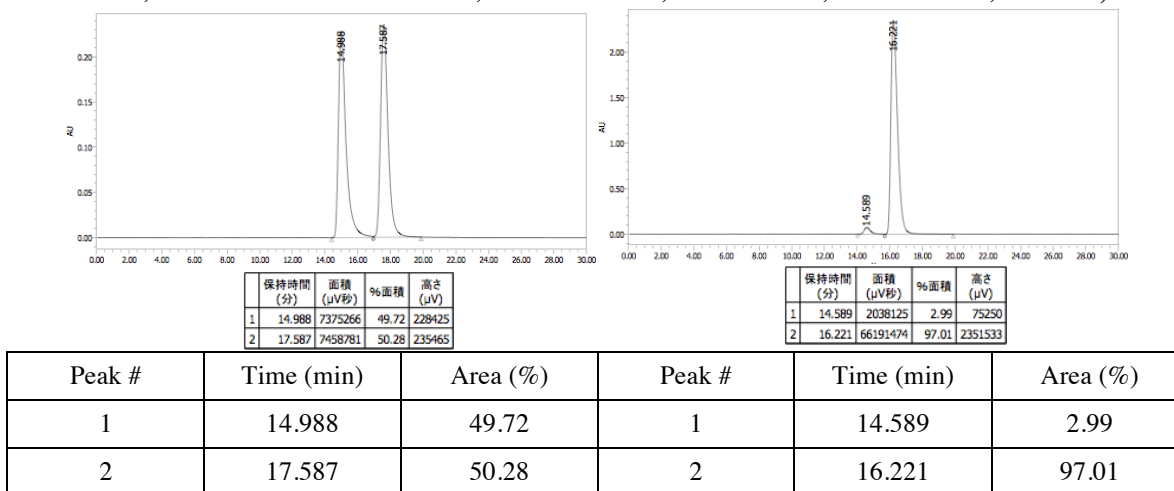

### 13. Studies Regarding the Two-Catalyst (Cu/Pd) Approach

In the case of the two-catalyst (Pd/Cu) system, there is complete epimerization when the *para*-*tert*-butylester-substituted styrene is used as the substrate (Eq. 3). In contrast, when *meta*-*tert*-butylester-substituted styrene was used, **2g-d** was formed with >98% diastereospecificity (Eq. 4).

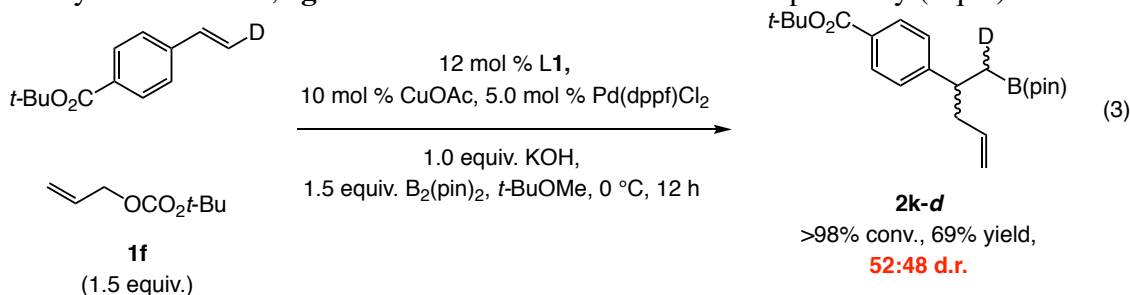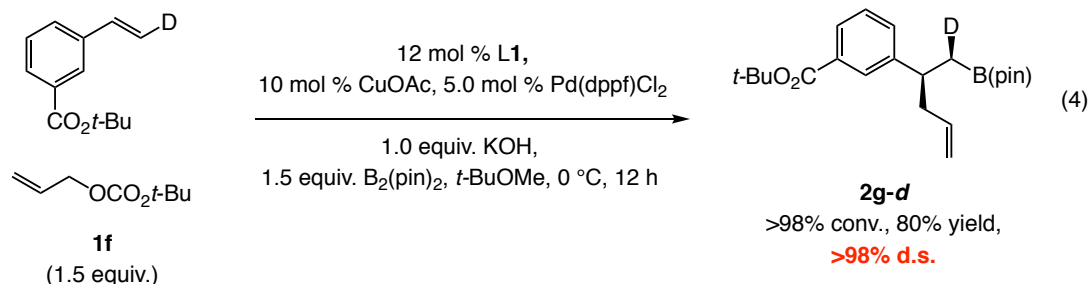

Moreover, increased amounts of allylcarbonate **1f** or Pd complex concentration (two-catalyst approach) does not improve e.r. (Scheme 9–10).

**Scheme 9.** Influence of Variations in Allylcarbonate Concentration on Enantioselectivity in the Two-Catalyst (Cu/Pd) System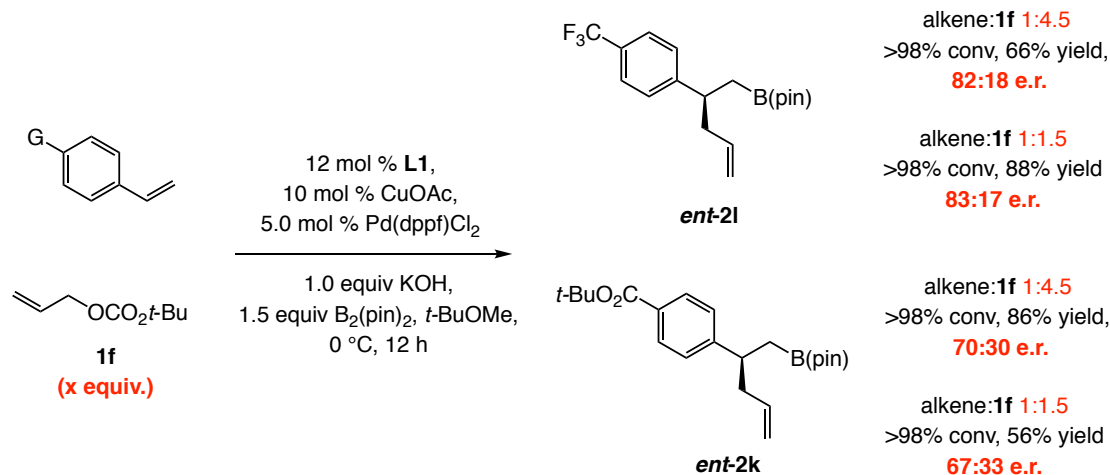**Scheme 10.** Influence of Increased Loading of the Pd-based Co-Catalyst on Enantioselectivity in the Two-Catalyst (Cu/Pd) System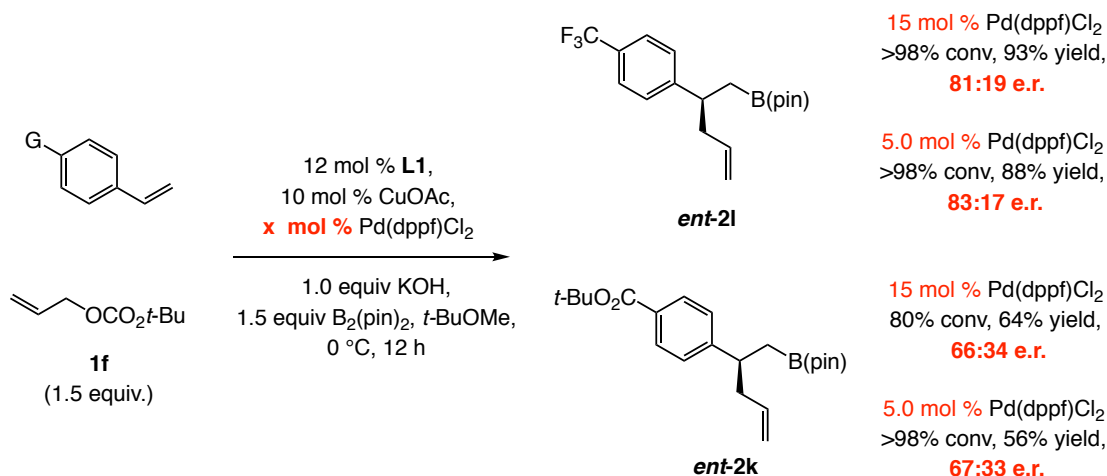

## 14. Spectroscopic Studies of Bis-Phosphine–Cu Complexes

### Spectroscopic Detection of the Key Intermediates in the Catalytic Cycle

**Detection of a chiral bis-phosphine–Cu complex and the corresponding aggregate structures.** In an N<sub>2</sub>-filled glove box, an oven-dried 2-dram vial was charged with CuOt-Bu (2.8 mg, 0.0203 mmol), bis-phosphine **L3c** (15 mg, 0.0224 mmol) and thf-*d*<sub>8</sub> (0.3 mL). The mixture was manually stirred leading to formation of a homogeneous light-green solution and was then transferred to an NMR tube after which the original vial was washed with 0.2 mL of thf-*d*<sub>8</sub>. The tube was capped with a septum and sealed with paraffin before being removed from glove box.

## Aggregates derived from bis-phosphine–Cu complexes and related equilibria

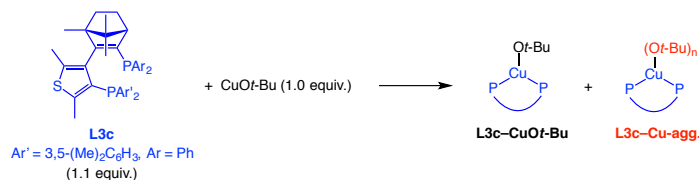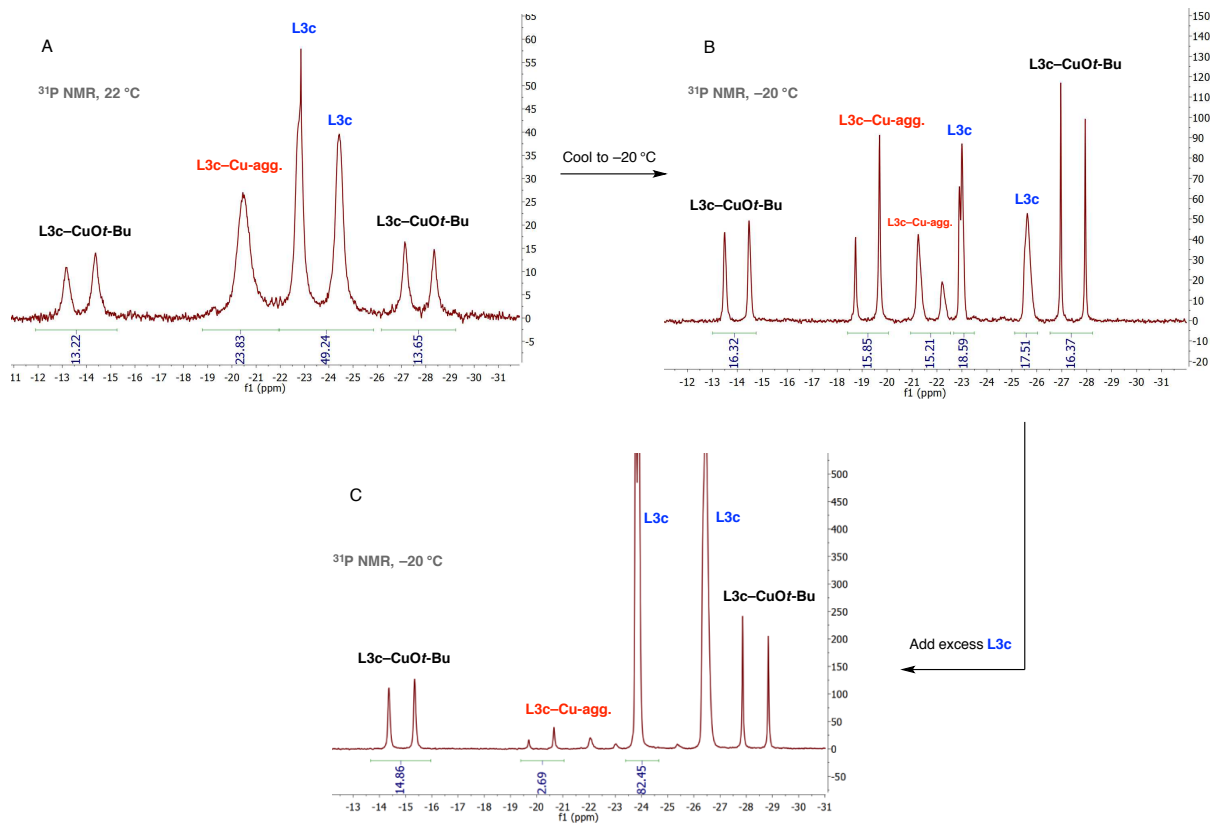

The  $^{31}\text{P}$  spectrum (A) was first acquired at 22 °C; there was ~30% un-coordinated bis-phosphine ligand. At -20 °C (spectrum B) peaks were generally sharper, suggesting that there is equilibrium among various complexes. Variations in temperature and concentration of **L3c** led to only slight changes in the chemical shift of the free ligand (as judged by the coupling constant values): whereas the  $J_{\text{P,P}}\text{L3c}$  is 21.8 Hz, it is 110-190 Hz for the derived Cu complex the same coupling constant (depending on extent of complexation).

**Conclusion:** The increase in concentration of bis-phosphine–Cu complex (less unbound CuOt-Bu) due to excess **L3c** is consistent with the fact that there was considerable increase in e.r. when excess ligand was used even with unoptimal alkene:electrophile ratio (Fig. 4c, manuscript).

Addition of styrene, *para*-trifluoromethylstyrene or pentafluorostyrene (20 equiv.) did not result in a detectable change on the concentration of any of the organocopper species.

**Conclusion:** An alkene does not compete with the bis-phosphine ligand for copper coordination.

When excess **L3c** were added (60 mg, 0.112 mmol; spectrum C), the amount of bis-phosphine–Cu complex increased (i.e., from ~1:1 to ~5.5 **L3c-CuOt-Bu**:**L3c-Cu-agg.**).

**Conclusion: L3c-Cu-agg.** contains more than one Cu atom (dimer or larger aggregate) and may be converted to monomeric species by introducing more ligand. A similar observation has been reported involving  $[\text{CuOt-Bu}(\text{PPh}_3)]_2$ .<sup>25</sup>

**Bis-phosphine-CuOt-Bu complexes undergo ligand dissociation.** Metal–oxygen bonds in alkoxide complexes are largely ionic. The polarity of the metal–oxygen bond is usually attenuated through  $\pi$ -donation by the oxygen atom into the metal d-orbitals in early transition metal systems. With late-transition metals, the ability of alkoxide ligands to serve as a  $\sigma$ - and  $\pi$ -donor systems is negligible. In the case of Cu(I) complexes ( $d^{10}$ ), alkoxide and hydroxide ligands for the most part serve as  $\sigma$ -donors. Thus, the oxygen atoms retain considerable Lewis basicity, which can lead to the formation of oligomeric species by alkoxo bridging<sup>25</sup>. The large size of bis-phosphine ligand **L3c** and the *tert*-butoxide moiety translates into accelerated oligomer formation, a process that is driven by a decrease in steric pressure (Scheme 11).

**Scheme 11.** Alkoxide Bridging Leads to Aggregation and Reduced Stereic Strain

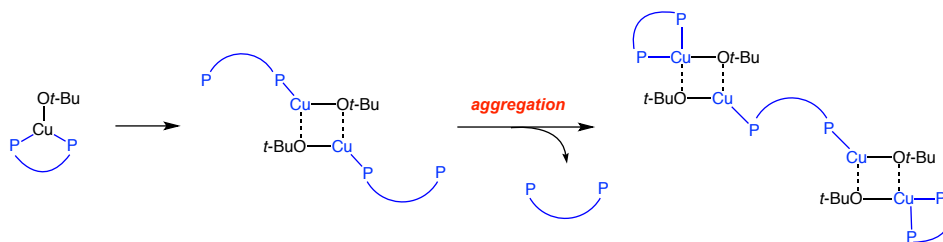

**Detection of bis-phosphine-Cu-B(pin) complex at  $-20$  °C.** In a  $\text{N}_2$ -filled glove box, a solution of CuOt-Bu (2.8 mg, 0.0203 mmol), **L3c** (15 mg, 0.0224 mmol), and PhCH<sub>2</sub>Ph (internal standard; 4.0  $\mu\text{L}$ , 0.0233 mmol) in thf-*d*<sub>8</sub> (0.3 mL) was prepared in a two-dram vial. The mixture was manually stirred upon formation of a homogeneous light-green solution and then transferred to an NMR tube, after which the vial was washed with additional 0.2 mL of thf-*d*<sub>8</sub>. The tube was capped with a septum and sealed with paraffin before being removed from glove box. The tube was then placed in a dry ice/acetone bath. A solution of bis(pinacolato)diboron (11.4 mg, 0.0449 mmol) was prepared in 0.2 mL of thf-*d*<sub>8</sub> in a separate vial and transferred by syringe to the solution in the NMR tube and stirred manually without removing the cooling bath to ensure minimal reaction occurring before being placed in the spectrometer. The spectrum was acquired at  $-20$  °C in a precooled spectrometer.

Resonances corresponding to bis-phosphine-Cu-Bpin and free **L3c** (30%) were detected by <sup>31</sup>P NMR spectroscopy (spectrum D). Complete disappearance of the initial signals assigned to L-CuOt-Bu was observed by <sup>1</sup>H NMR spectroscopy (spectrum E after the addition of B<sub>2</sub>pin<sub>2</sub> solution, and spectrum F before the addition of B<sub>2</sub>pin<sub>2</sub> solution).

(25) Lemmen, T. H., Goeden, G. V., Huffman, J. C., Geerts, R. L. & Caulton, K. G. *Inorg. Chem.* **29**, 3680–3685 (1990).

## Excess bis-phosphine ligand decreases the amount of unbound Cu–B(pin)

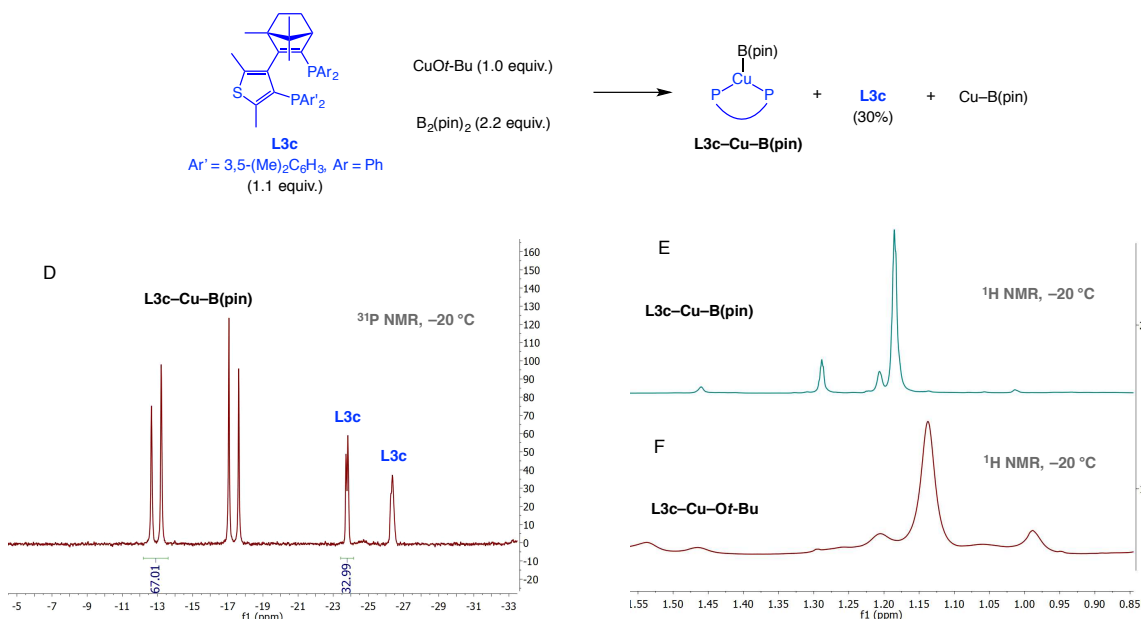

**Detection of alkyl–Cu diastereomers and evidence for Cu–H elimination.** In an N<sub>2</sub>-filled glove box, a solution of CuOt-Bu (2.8 mg, 0.0203 mmol), bis-phosphine **9c** (15 mg, 0.0224 mmol), *para*-trifluoromethylstyrene (5.0 μL, 0.0314 mmol) and PhCH<sub>2</sub>Ph (internal standard; 4.0 μL, 0.0233 mmol) in thf-*d*<sub>8</sub> (0.3 mL) were placed in a two-dram vial. The mixture was manually stirred upon formation of a homogeneous light-green solution and then transferred to an NMR tube, after which the vial was washed with additional 0.2 mL of thf-*d*<sub>8</sub>. The tube was capped with a septum and sealed with paraffin before removal from glove box and placed into a dry ice/acetone bath. A solution of B<sub>2</sub>(pin)<sub>2</sub> (11.4 mg, 0.0449 mmol) dissolved in 0.2 mL of thf-*d*<sub>8</sub> was at this time added and the resulting mixture was shaken/stirred manually without removing the cooling bath to minimize reaction occurring prior to positioning the tube in the spectrometer. The spectrum was then acquired at –20 °C.

As shown in spectra G and H below, the resonances corresponding to diastereomeric Cu-alkyl complexes (78% conv., 99:1 d.r.) were detected in the <sup>1</sup>H and <sup>31</sup>P NMR spectra; there was ~17% of uncoordinated bis-phosphine **L3c** also present. The sample was then allowed to warm to 22 °C (while in the spectrometer) and reaction progress monitored spectroscopically. There was further transformation to the Cu-alkyl complexes (93% conv.; spectra I and J) along with diminution of d.r. to 72:28. Additionally, the acquired spectra indicate the generation of the corresponding *E*-β-alkenyl–B(pin) byproduct formed through Cu–H elimination with significant amounts formed after 1.5 h at 22 °C (spectra K and L). The identity of the alkenyl–B(pin) compound was confirmed by spiking the tube with an authentic sample of the same material.

## Kinetic enantioselectivity of Cu–B(pin) addition and reactivity of chiral vs. achiral Cu–B(pin) complexes

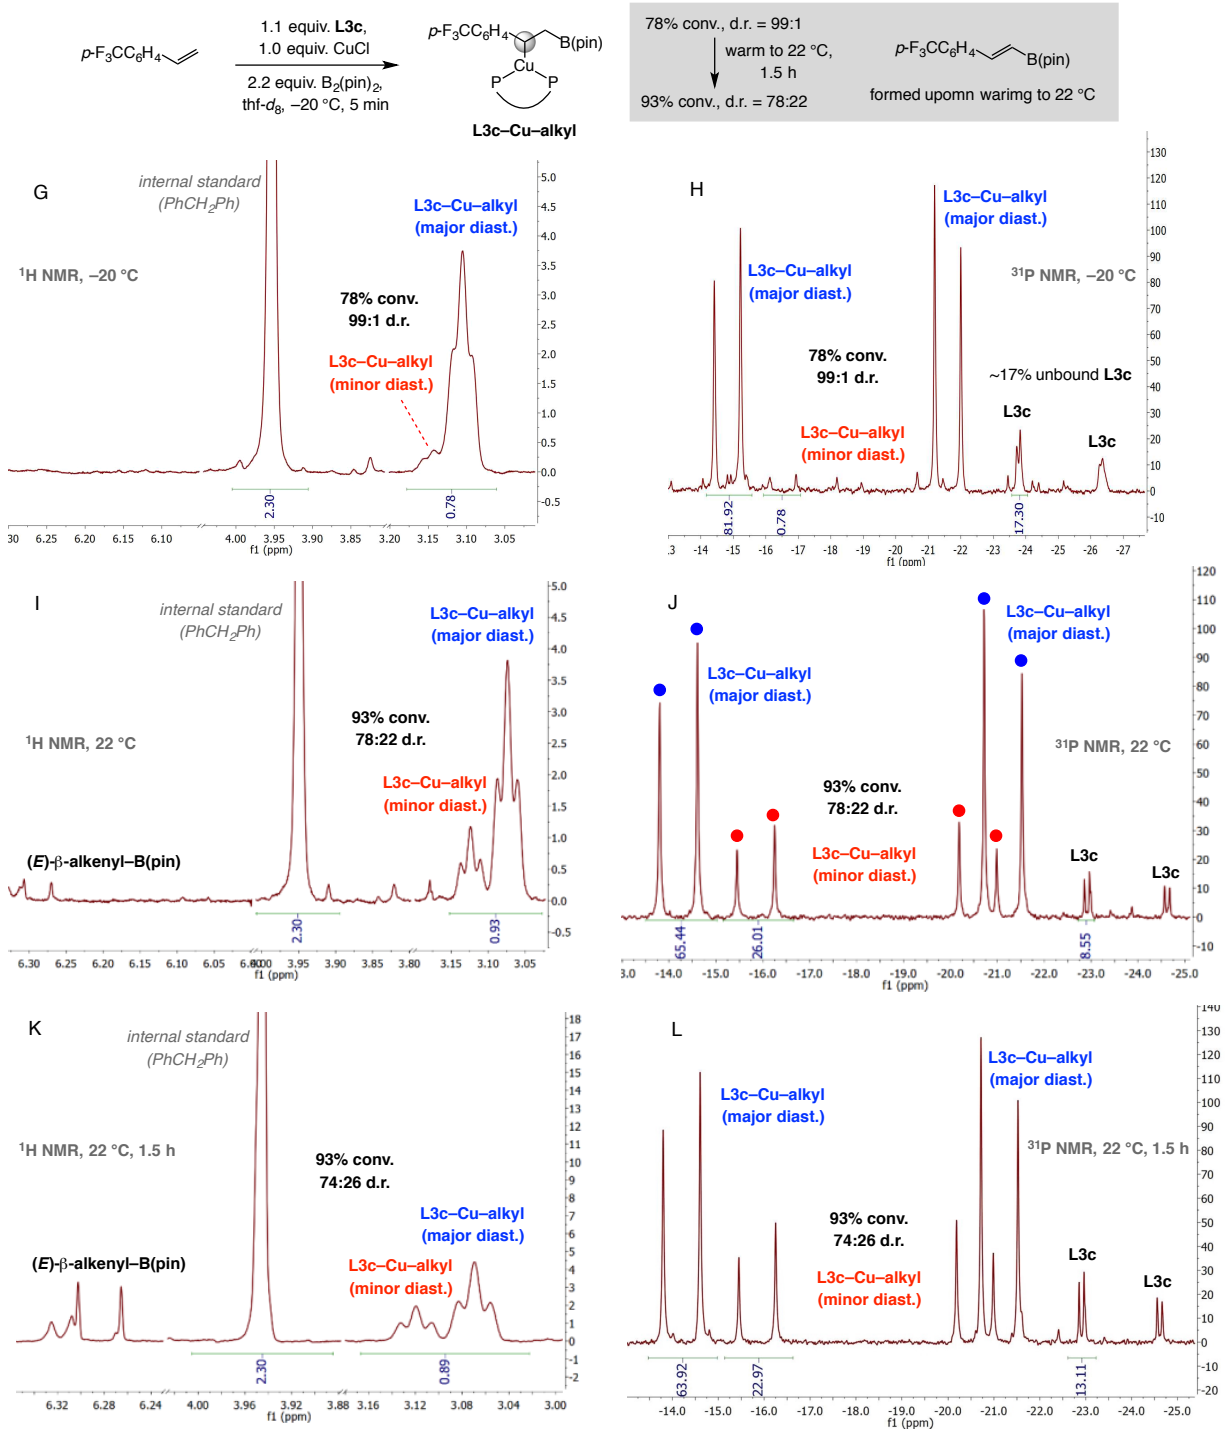

**Conclusions.** The above experiment show that the bis-phosphine–Cu–B(pin) complex adds to *para*-trifluoromethylstyrene readily and rapidly at  $-20^\circ\text{C}$  in a highly enantioselective manner. When the mixture was allowed to warm to  $22^\circ\text{C}$ , the ratio between the two diastereomeric alkylcopper complexes decreased with time (from 99:1 to ~75:25) with more of the Cu–alkyl complex being formed (93% conv.). The decrease in d.r. may be attributed to lower reactivity of the un-coordinated



Cu–B(pin) complex, which can add to the alkene substrate only at a higher temperature, supporting the notion that such a species can engender diminution in enantioselectivity in cases where the olefin is more electrophilic/reactive. Once the aryl olefin is fully converted to the corresponding alkylcopper intermediate, there can be complete bis-phosphine–Cu coordination, leaving only the excess bis-phosphine unbound. It is also possible that some of the lowering in e.r. arises from preferential Cu–H elimination by the Cu–alkyl major diastereomer, accounting for the formation of the alkenyl–B(pin) byproduct at 22 °C.

### Cu–H Addition to a $\beta$ -Alkenyl–B(pin) Byproduct

**Examination of bis-phosphine–Cu–H addition to an (*E*)- $\beta$ -alkenyl–B(pin) compound.** In an N<sub>2</sub>-filled glove box, a solution of CuOt-Bu (2.8 mg, 0.0203 mmol), **L3c** (15 mg, 0.0224 mmol) and PhCH<sub>2</sub>Ph as the internal standard (5.0  $\mu$ L, 0.03 mmol) was prepared in thf-*d*<sub>8</sub> (0.3 mL) in a two-dram vial. The mixture was manually stirred leading to the formation of a homogeneous light-green solution and was then transferred to an NMR tube. The vial was washed with an additional 0.2 mL of thf-*d*<sub>8</sub>. The tube was capped with a septum and sealed with paraffin before removal from glove box and placed into a dry ice/acetone bath. A solution of polymethylhydrosiloxane (PMHS) (10  $\mu$ L, 0.17 mmol) and (*E*)-2-[4-(trifluoromethyl)phenyl]vinylboronic acid pinacol ester (13.8 mg, 0.043 mmol) prepared in 0.2 mL of thf-*d*<sub>8</sub> was added by syringe and the resulting mixture was stirred manually (cooling bath retained to avoid any premature transformation). Reaction progress was monitored at 22 °C.

Resonances for **L3c–Cu–*iso*-alkyl-1** were detected in the <sup>1</sup>H NMR spectrum (M; ~80% conv.). The <sup>31</sup>P NMR spectrum (N) indicates 83:17 d.r. There were no detectable resonances for **L3c–Cu–alkyl-1**, but ~13% of 2-(4-trifluoromethylphenyl)ethyl-1-boronic acid pinacol ester ( **$\beta$ -alkyl–B(pin)-1**), probably formed due to reaction of organocopper with adventitious water, was detected. The same experiment was carried out with (*E*)-2-phenyl-vinylboronic acid pinacol ester (13.8 mg, 0.043 mmol). The resonances corresponding to **L3c–Cu–*iso*-alkyl-2** were detected by <sup>1</sup>H NMR (spectrum O; 73% conv.) along with 12%  **$\beta$ -alkyl–B(pin)-2**. As before, d.r. was determined by analysis of the <sup>31</sup>P NMR spectrum (P; 78:22).

Through the experiment shown in Eq. 5 we examined the issue of Cu–H addition to (*E*)-2-phenyl-vinylboronic acid pinacol ester followed by C–C bond formation. Only ***iso*-2a** was detected (11% conv.; <2% **2a**).

**Conclusions.** Due to reversal in alkene polarization due to the presence of the electron-withdrawing B(pin) group, Cu–H addition to (*E*)- $\beta$ -alkenyl–B(pin) derivatives occurs with opposite site selectivity compared to Cu–B(pin) additions (i.e., homobenzylic Cu–C bond). Preferential formation of ***iso*-2a** is consistent with a study reported by Sadighi<sup>26</sup>. It is unlikely that Cu–H re-addition is responsible for the loss in enantioselectivity. We could not detect **L3c–Cu–alkyl-1** or **L3c–Cu–alkyl-2**.

Regioselectivity of Cu-H addition to a  $\beta$ -alkenyl-B(pin) compound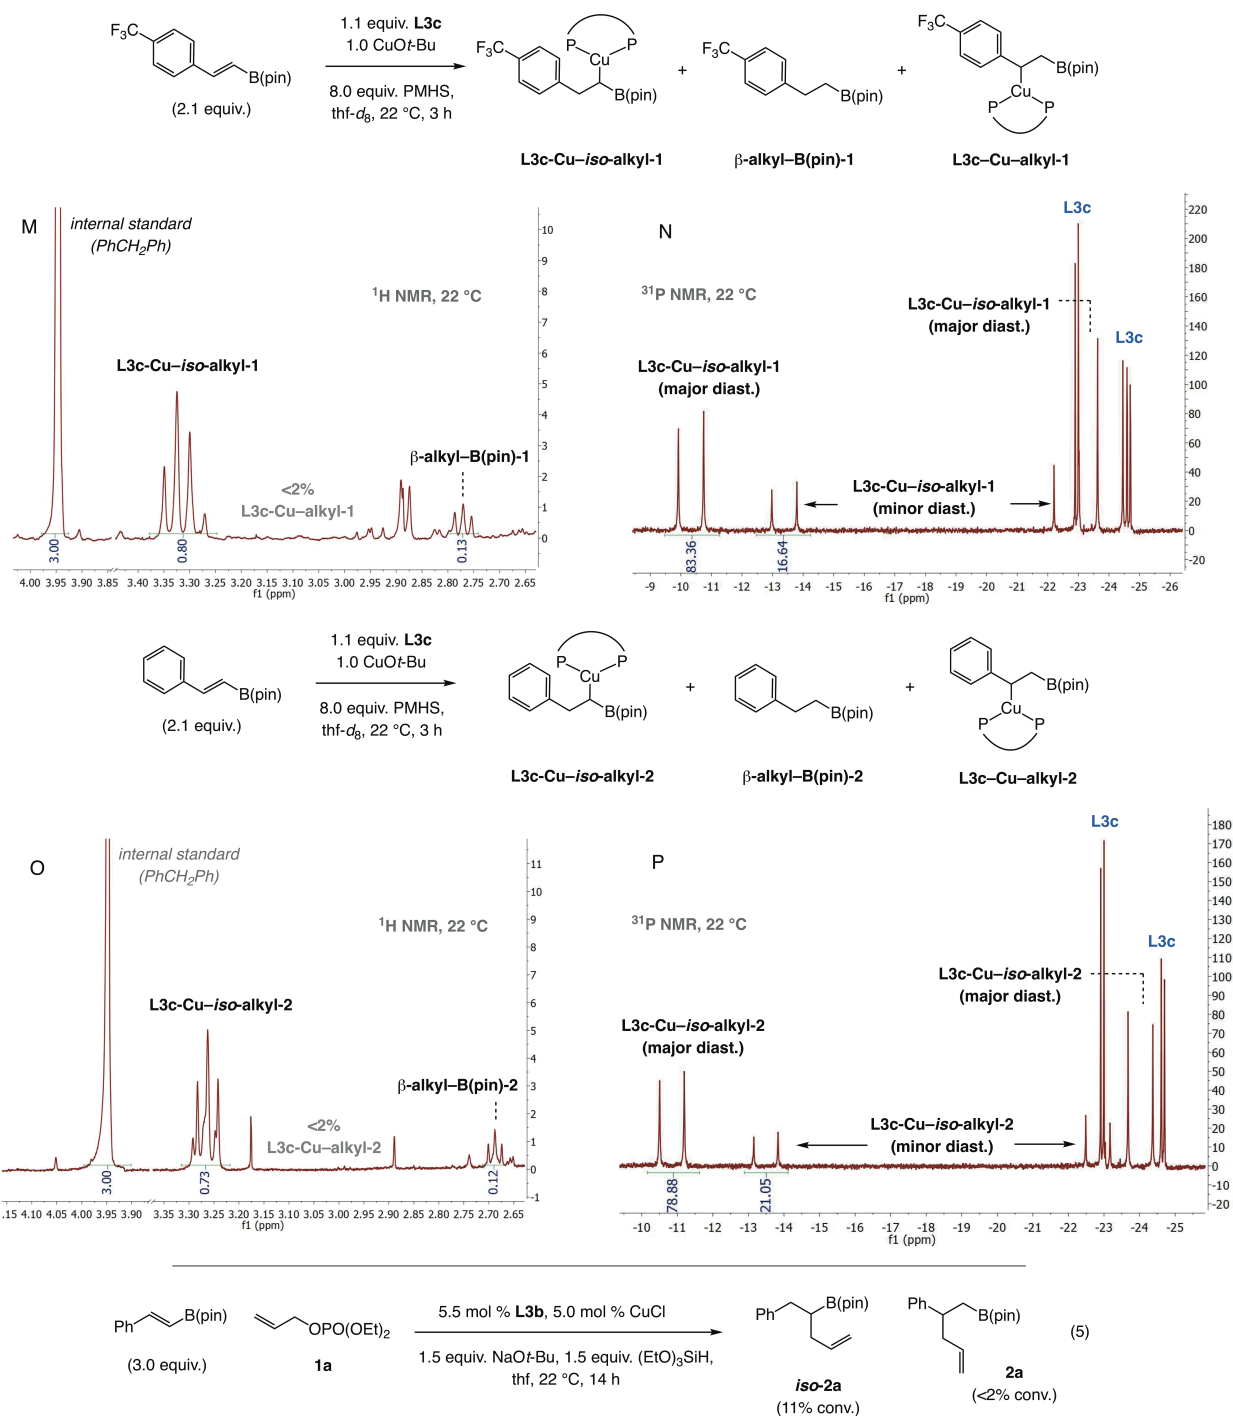

**Probing the feasibility of Cu-H elimination/re-addition leading to loss of enantiomeric purity of a Cu-alkyl species; a cross-over experiment.** In an N<sub>2</sub>-filled glove box, a solution of CuOt-Bu (2.8 mg, 0.0203 mmol), **L3c** (15 mg, 0.0224 mmol), styrene (2.4  $\mu$ L, 0.0203 mmol) and

Evidence for Cu-H elimination; a cross-over experiment

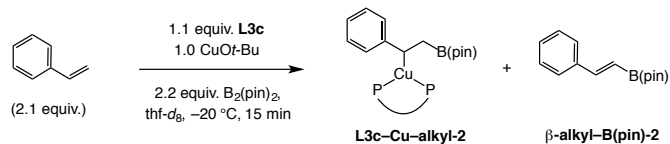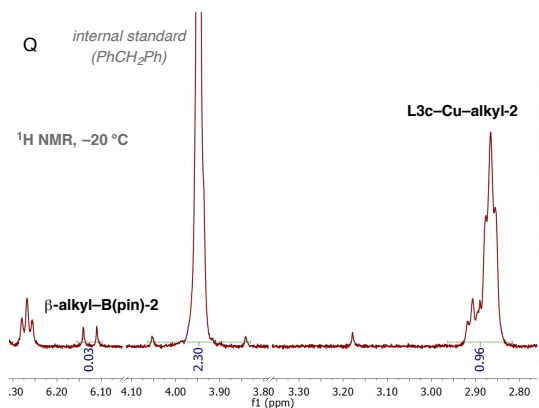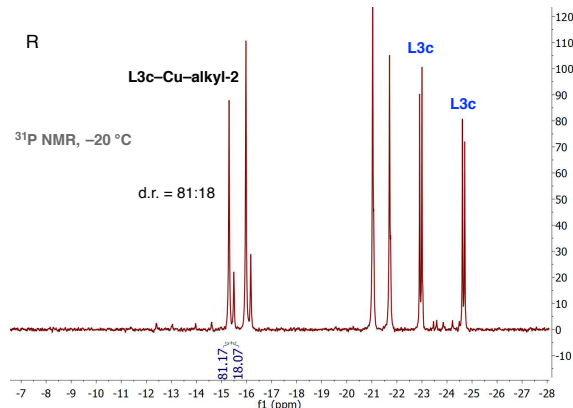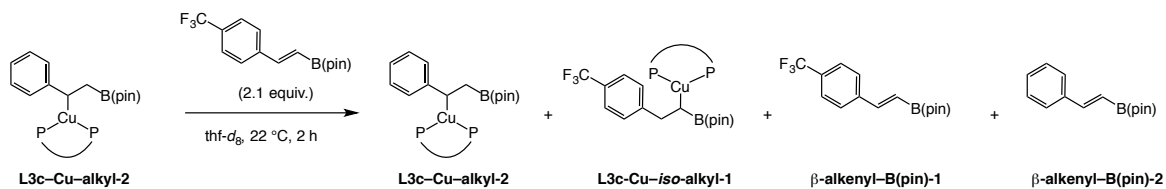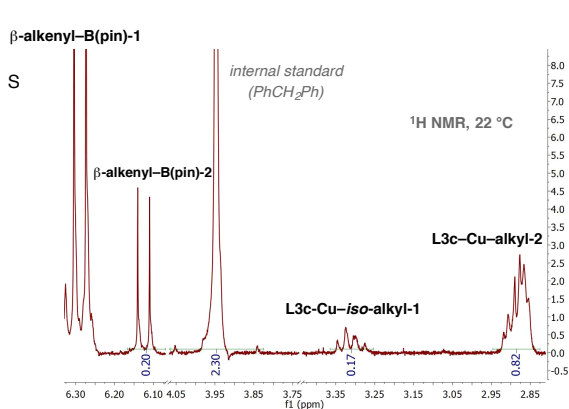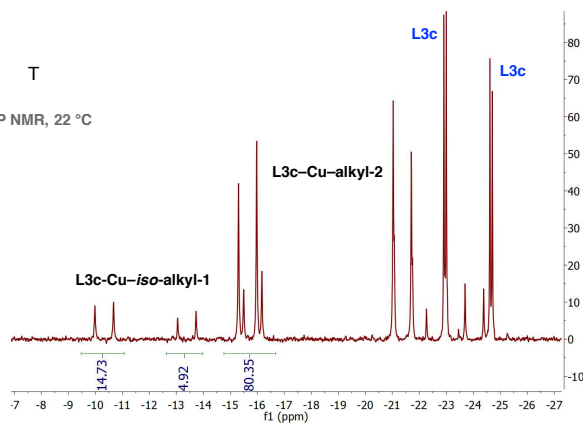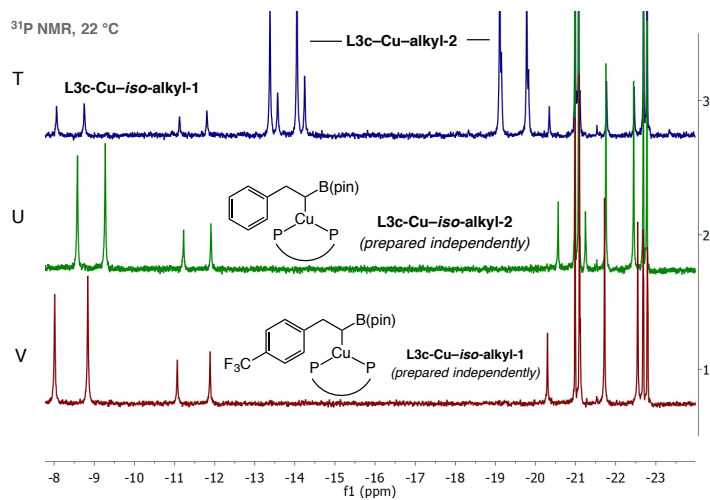

PhCH<sub>2</sub>Ph (internal standard; 4.0  $\mu$ L, 0.0233 mmol) in thf-*d*<sub>8</sub> (0.3 mL) was prepared in a two-dram vial. The mixture was manually stirred leading to the formation of a homogeneous light-green solution and then transferred to an NMR tube, after which the vial was washed with additional 0.2 mL of thf-*d*<sub>8</sub>. The tube was sealed with a septum and paraffin before removal from the glove box and introduced into a dry ice/acetone bath. A solution of bis(pinacolato)diboron (11.4 mg, 0.0449 mmol) in 0.2 mL thf-*d*<sub>8</sub> was then added by syringe and the mixture stirred manually without removing the cooling bath (to avoid premature transformation prior to the tube being placed in the spectrometer).

Resonances for diastereomers **L3c-Cu-alkyl-2** were detected by <sup>1</sup>H NMR (spectrum Q; 96% conv., 15 min, 22 °C); the corresponding alkenyl-B(pin) was detected in trace amounts (<5%). The <sup>31</sup>P NMR (spectrum R) indicates 81:19 d.r. for the formation of **L3c-Cu-alkyl-2**.

A solution of (*E*)-2-[4-(trifluoromethyl)phenyl]vinylboronic acid pinacol ester (13.8 mg, 0.043 mmol, 2.1 equiv.) in 0.2 mL thf-*d*<sub>8</sub> was added to the mixture transferred by syringe. After 2 h at 22 °C, spectroscopic analysis (spectra S and T) indicated depletion of **L3c-Cu-alkyl-2** concomitant with the appearance of resonances for **L3c-Cu-iso-alkyl-1** (17% conv.; 75:25 d.r. based on <sup>31</sup>P NMR spectrum T). Also shown for comparison are <sup>31</sup>P NMR spectra T, U and V, indicating the absence of any product from Cu-H addition to less electrophilic/reactive  **$\beta$ -alkenyl-B(pin)-2**.

**Conclusions.** A bis-phosphine-Cu-H complex can be generated from reaction of a Cu-alkyl complex generated from Cu-B(pin) addition to an alkene, and may subsequently be transferred by a Cu-H elimination/re-addition sequence to a different alkenyl-B(pin) compound but with the opposite regiochemistry (from benzylic to homobenzylic Cu-C bond); this is further illustrated in Scheme 12. It is therefore unlikely that Cu-H re-addition from the opposite face of the *same*

**Scheme 12.** Regiochemistry of Cu-H elimination/re-addition

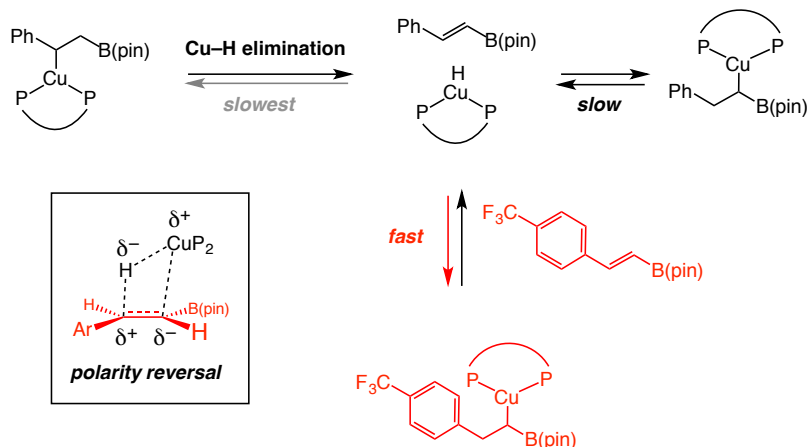

alkene can occur without dissociation from the original alkenyl-B(pin) by product. Furthermore, the observation that Cu-H can dissociate and then add to a different alkenyl-B(pin) compound points to a weak bis-phosphine-Cu-H...alkenyl-B(pin) coordination. The possibility of Cu-H re-addition to the same alkenyl-B(pin) is rendered especially unlikely considering the presence of substantially larger amounts of terminal alkene substrate under the catalytic condition (vs. any released alkenyl-B(pin)).

## 15. Determination of Absolute Stereochemistry

Other than comparison of specific rotation of **10** to the reported values suggesting a (*R*) configuration of the products, we synthesized **38** and obtained the X-ray crystal structure to ascertain the absolute stereochemical identity of the products.

**Scheme 13.** Synthesis of Lactone **38**

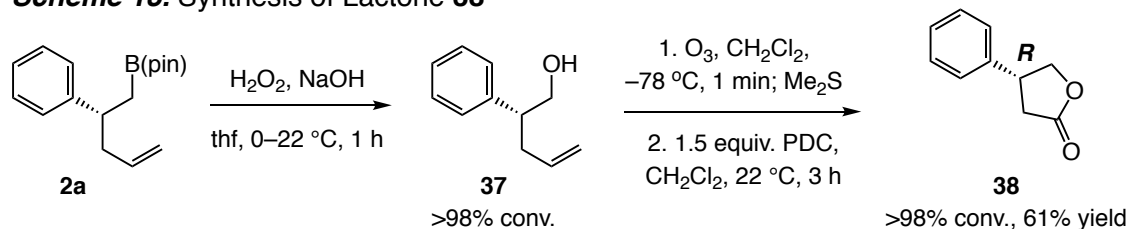

Compound **38** was synthesized from enantiomerically enriched **2a** (95:5 e.r.), as illustrated in Scheme 13. (*R*)-4-Phenyldihydrofuran-2(3*H*)-one (**38**): The spectroscopic data match those reported previously.<sup>27</sup>  $^1\text{H}$  NMR (400 MHz,  $\text{CDCl}_3$ ):  $\delta$  7.40–7.22 (5H, m), 4.67 (1H, dd,  $J = 8.8, 8.0$  Hz), 4.28 (1H, dd,  $J = 9.0, 8.2$  Hz), 3.79 (1H, app pent,  $J = 8.5$  Hz), 2.93 (1H, dd,  $J = 17.6$  and 8.8 Hz), 2.68 (1H, dd,  $J = 17.6, 8.8$  Hz); Specific Rotation:  $[\alpha]_{\text{D}}^{20} -40.8$  ( $c$  0.50,  $\text{CHCl}_3$ ). The absolute configuration of **38** was established by X-ray analysis, which was assigned to be (*R*). Compound **2a** is thus assigned to possess the (*R*) configuration. The absolute stereochemistry for other enantiomerically enriched products has been assigned by inference.

## 16. Data for X-ray Crystallography of **38**

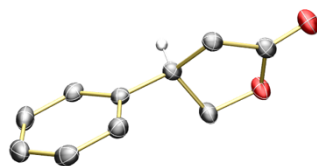

**Table 2.** Crystal data and structure refinement for  $\text{C}_{10}\text{H}_{10}\text{O}_2$

|                      |                   |
|----------------------|-------------------|
| Identification code  | C10H10O2          |
| Empirical formula    | C10 H10 O2        |
| Formula weight       | 162.18            |
| Temperature          | 100(2) K          |
| Wavelength           | 1.54178 Å         |
| Crystal system       | Monoclinic        |
| Space group          | $P2_1$            |
| Unit cell dimensions | $a = 6.1692(7)$ Å |
|                      | $b = 7.7518(8)$ Å |
|                      | $c = 8.6969(9)$ Å |

(27) Malkov, A. V., Friscourt, F., Bell, M., Swarbrick, M. E. & Kočovský, P. *J. Org. Chem.* **73**, 3996–4003 (2008).

|                                   |                                             |
|-----------------------------------|---------------------------------------------|
| Volume                            | 415.33(8) Å <sup>3</sup>                    |
| Z                                 | 2                                           |
| Density (calculated)              | 1.297 Mg/m <sup>3</sup>                     |
| Absorption coefficient            | 0.729 mm <sup>-1</sup>                      |
| F(000)                            | 172                                         |
| Crystal size                      | 0.600 x 0.070 x 0.050 mm <sup>3</sup>       |
| Theta range for data collection   | 5.092 to 66.613°.                           |
| Index ranges                      | -7<=h<=7, -8<=k<=9, -10<=l<=10              |
| Reflections collected             | 4434                                        |
| Independent reflections           | 1435 [R(int) = 0.0455]                      |
| Completeness to theta = 67.679°   | 98.2 %                                      |
| Absorption correction             | Semi-empirical from equivalents             |
| Max. and min. transmission        | 0.7528 and 0.5867                           |
| Refinement method                 | Full-matrix least-squares on F <sup>2</sup> |
| Data / restraints / parameters    | 1435 / 1 / 109                              |
| Goodness-of-fit on F <sup>2</sup> | 1.091                                       |
| Final R indices [I>2sigma(I)]     | R1 = 0.0341, wR2 = 0.0848                   |
| R indices (all data)              | R1 = 0.0346, wR2 = 0.0858                   |
| Absolute structure parameter      | -0.05(11)                                   |
| Extinction coefficient            | na                                          |
| Largest diff. peak and hole       | 0.145 and -0.213 e. Å <sup>-3</sup>         |

**Table 3. Atomic coordinates (x10<sup>4</sup>) and equivalent isotropic displacement parameters (Å<sup>2</sup> x 10<sup>3</sup>) for C<sub>10</sub>H<sub>10</sub>O<sub>2</sub>. U(eq) is defined as one third of the trace of the orthogonalized U<sup>ij</sup> tensor**

|      | x       | y       | z       | U(eq) |
|------|---------|---------|---------|-------|
| O(1) | 4872(2) | 3283(2) | 344(2)  | 29(1) |
| O(2) | 8163(2) | 4179(2) | -234(2) | 34(1) |
| C(1) | 6684(3) | 4254(3) | 609(2)  | 25(1) |
| C(2) | 6464(3) | 5329(3) | 2029(2) | 23(1) |
| C(3) | 4017(3) | 5331(3) | 2238(2) | 22(1) |
| C(4) | 3365(3) | 3581(3) | 1546(2) | 26(1) |
| C(5) | 3258(3) | 5568(2) | 3851(2) | 21(1) |

|       |         |         |         |       |
|-------|---------|---------|---------|-------|
| C(6)  | 4294(3) | 4761(3) | 5124(2) | 26(1) |
| C(7)  | 3475(4) | 4930(3) | 6572(2) | 31(1) |
| C(8)  | 1594(4) | 5872(3) | 6774(2) | 32(1) |
| C(9)  | 571(3)  | 6695(3) | 5510(3) | 31(1) |
| C(10) | 1411(3) | 6549(3) | 4071(2) | 24(1) |

---

**Table 4. Bond lengths [Å] and angles [°] for C<sub>10</sub>H<sub>10</sub>O<sub>2</sub>**

|                |            |
|----------------|------------|
| O(1)-C(1)      | 1.357(3)   |
| O(1)-C(4)      | 1.453(2)   |
| O(2)-C(1)      | 1.202(3)   |
| C(1)-C(2)      | 1.502(3)   |
| C(2)-C(3)      | 1.530(3)   |
| C(2)-H(2A)     | 0.9900     |
| C(2)-H(2B)     | 0.9900     |
| C(3)-C(5)      | 1.513(3)   |
| C(3)-C(4)      | 1.530(3)   |
| C(3)-H(3)      | 1.0000     |
| C(4)-H(4A)     | 0.9900     |
| C(4)-H(4B)     | 0.9900     |
| C(5)-C(10)     | 1.392(3)   |
| C(5)-C(6)      | 1.396(3)   |
| C(6)-C(7)      | 1.388(3)   |
| C(6)-H(6)      | 0.9500     |
| C(7)-C(8)      | 1.390(3)   |
| C(7)-H(7)      | 0.9500     |
| C(8)-C(9)      | 1.393(3)   |
| C(8)-H(8)      | 0.9500     |
| C(9)-C(10)     | 1.384(3)   |
| C(9)-H(9)      | 0.9500     |
| C(10)-H(10)    | 0.9500     |
| C(1)-O(1)-C(4) | 110.01(15) |
| O(2)-C(1)-O(1) | 120.97(19) |

|                  |            |
|------------------|------------|
| O(2)-C(1)-C(2)   | 129.3(2)   |
| O(1)-C(1)-C(2)   | 109.77(17) |
| C(1)-C(2)-C(3)   | 103.33(16) |
| C(1)-C(2)-H(2A)  | 111.1      |
| C(3)-C(2)-H(2A)  | 111.1      |
| C(1)-C(2)-H(2B)  | 111.1      |
| C(3)-C(2)-H(2B)  | 111.1      |
| H(2A)-C(2)-H(2B) | 109.1      |
| C(5)-C(3)-C(4)   | 112.65(16) |
| C(5)-C(3)-C(2)   | 117.74(15) |
| C(4)-C(3)-C(2)   | 101.13(16) |
| C(5)-C(3)-H(3)   | 108.3      |
| C(4)-C(3)-H(3)   | 108.3      |
| C(2)-C(3)-H(3)   | 108.3      |
| O(1)-C(4)-C(3)   | 105.02(16) |
| O(1)-C(4)-H(4A)  | 110.7      |
| C(3)-C(4)-H(4A)  | 110.7      |
| O(1)-C(4)-H(4B)  | 110.7      |
| C(3)-C(4)-H(4B)  | 110.7      |
| H(4A)-C(4)-H(4B) | 108.8      |
| C(10)-C(5)-C(6)  | 118.66(18) |
| C(10)-C(5)-C(3)  | 119.28(17) |
| C(6)-C(5)-C(3)   | 121.98(18) |
| C(7)-C(6)-C(5)   | 120.31(19) |
| C(7)-C(6)-H(6)   | 119.8      |
| C(5)-C(6)-H(6)   | 119.8      |
| C(6)-C(7)-C(8)   | 120.6(2)   |
| C(6)-C(7)-H(7)   | 119.7      |
| C(8)-C(7)-H(7)   | 119.7      |
| C(7)-C(8)-C(9)   | 119.20(18) |
| C(7)-C(8)-H(8)   | 120.4      |
| C(9)-C(8)-H(8)   | 120.4      |
| C(10)-C(9)-C(8)  | 120.0(2)   |
| C(10)-C(9)-H(9)  | 120.0      |



|                  |            |
|------------------|------------|
| C(8)-C(9)-H(9)   | 120.0      |
| C(9)-C(10)-C(5)  | 121.13(19) |
| C(9)-C(10)-H(10) | 119.4      |
| C(5)-C(10)-H(10) | 119.4      |

---

Symmetry transformations used to generate equivalent atoms:

**Table 5. Anisotropic displacement parameters ( $\text{\AA}^2 \times 10^3$ ) for  $\text{C}_{10}\text{H}_{10}\text{O}_2$ . The anisotropic displacement factor exponent takes the form:  $-2\pi^2 [ h^2 a^{*2} U^{11} + \dots + 2 h k a^* b^* U^{12} ]$**

---

|       | $U^{11}$ | $U^{22}$ | $U^{33}$ | $U^{23}$ | $U^{13}$ | $U^{12}$ |
|-------|----------|----------|----------|----------|----------|----------|
| O(1)  | 25(1)    | 38(1)    | 24(1)    | -7(1)    | 4(1)     | -6(1)    |
| O(2)  | 28(1)    | 46(1)    | 30(1)    | -1(1)    | 8(1)     | 0(1)     |
| C(1)  | 24(1)    | 28(1)    | 23(1)    | 3(1)     | 0(1)     | 1(1)     |
| C(2)  | 20(1)    | 24(1)    | 25(1)    | 2(1)     | 0(1)     | -1(1)    |
| C(3)  | 21(1)    | 24(1)    | 22(1)    | 3(1)     | 0(1)     | 1(1)     |
| C(4)  | 23(1)    | 34(1)    | 23(1)    | -4(1)    | 3(1)     | -3(1)    |
| C(5)  | 21(1)    | 18(1)    | 24(1)    | -2(1)    | 1(1)     | -3(1)    |
| C(6)  | 29(1)    | 23(1)    | 26(1)    | 1(1)     | 2(1)     | 2(1)     |
| C(7)  | 42(1)    | 24(1)    | 25(1)    | 0(1)     | -2(1)    | -5(1)    |
| C(8)  | 40(1)    | 31(1)    | 27(1)    | -9(1)    | 9(1)     | -10(1)   |
| C(9)  | 25(1)    | 31(1)    | 37(1)    | -11(1)   | 6(1)     | 0(1)     |
| C(10) | 21(1)    | 21(1)    | 30(1)    | -2(1)    | -2(1)    | -2(1)    |

---

**Table 6. Hydrogen coordinates ( $\times 10^4$ ) and isotropic displacement parameters ( $\text{\AA}^2 \times 10^3$ ) for  $\text{C}_{10}\text{H}_{10}\text{O}_2$**

---

|       | x    | y    | z    | U(eq) |
|-------|------|------|------|-------|
| H(2A) | 7011 | 6515 | 1879 | 28    |
| H(2B) | 7263 | 4805 | 2930 | 28    |
| H(3)  | 3343 | 6256 | 1569 | 27    |

|       |      |      |      |    |
|-------|------|------|------|----|
| H(4A) | 3494 | 2663 | 2336 | 31 |
| H(4B) | 1850 | 3610 | 1109 | 31 |
| H(6)  | 5564 | 4094 | 4998 | 31 |
| H(7)  | 4208 | 4395 | 7435 | 37 |
| H(8)  | 1014 | 5954 | 7761 | 39 |
| H(9)  | -704 | 7357 | 5636 | 37 |
| H(10) | 715  | 7129 | 3218 | 29 |

---

**Table 7. Torsion angles [°] for C<sub>10</sub>H<sub>10</sub>O<sub>2</sub>**

|                      |             |
|----------------------|-------------|
| C(4)-O(1)-C(1)-O(2)  | 178.59(19)  |
| C(4)-O(1)-C(1)-C(2)  | -1.5(2)     |
| O(2)-C(1)-C(2)-C(3)  | 161.0(2)    |
| O(1)-C(1)-C(2)-C(3)  | -18.9(2)    |
| C(1)-C(2)-C(3)-C(5)  | 153.11(17)  |
| C(1)-C(2)-C(3)-C(4)  | 29.95(18)   |
| C(1)-O(1)-C(4)-C(3)  | 21.5(2)     |
| C(5)-C(3)-C(4)-O(1)  | -158.08(16) |
| C(2)-C(3)-C(4)-O(1)  | -31.48(18)  |
| C(4)-C(3)-C(5)-C(10) | -100.7(2)   |
| C(2)-C(3)-C(5)-C(10) | 142.14(19)  |
| C(4)-C(3)-C(5)-C(6)  | 76.0(2)     |
| C(2)-C(3)-C(5)-C(6)  | -41.1(3)    |
| C(10)-C(5)-C(6)-C(7) | 0.5(3)      |
| C(3)-C(5)-C(6)-C(7)  | -176.25(19) |
| C(5)-C(6)-C(7)-C(8)  | 1.3(3)      |
| C(6)-C(7)-C(8)-C(9)  | -2.0(3)     |
| C(7)-C(8)-C(9)-C(10) | 0.9(3)      |
| C(8)-C(9)-C(10)-C(5) | 0.9(3)      |
| C(6)-C(5)-C(10)-C(9) | -1.6(3)     |
| C(3)-C(5)-C(10)-C(9) | 175.24(19)  |

---

Symmetry transformations used to generate equivalent atoms:

## 17. Representative Products of Bis-Phosphine–Cu-Catalyzed Reactions

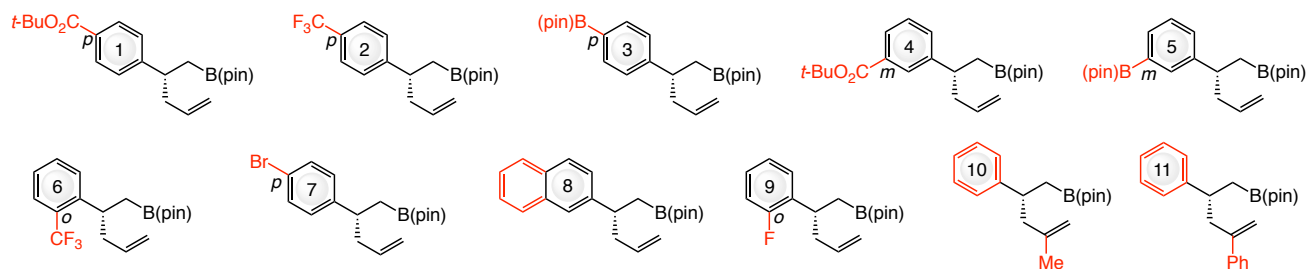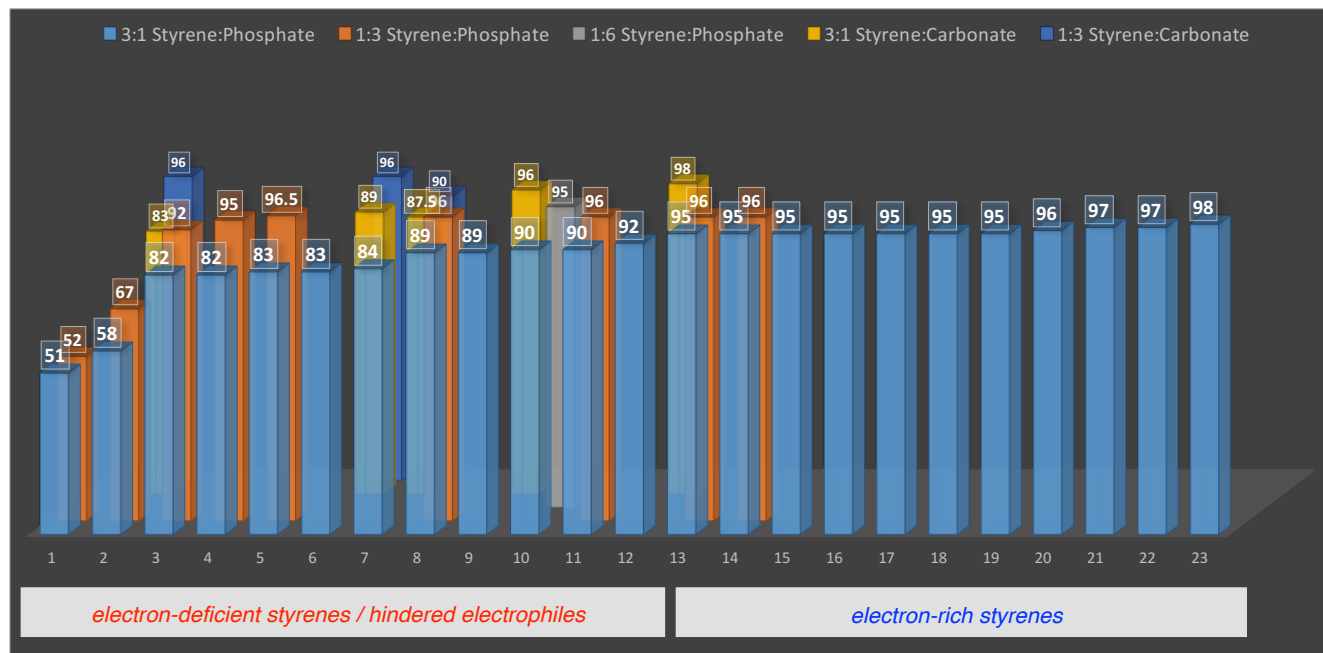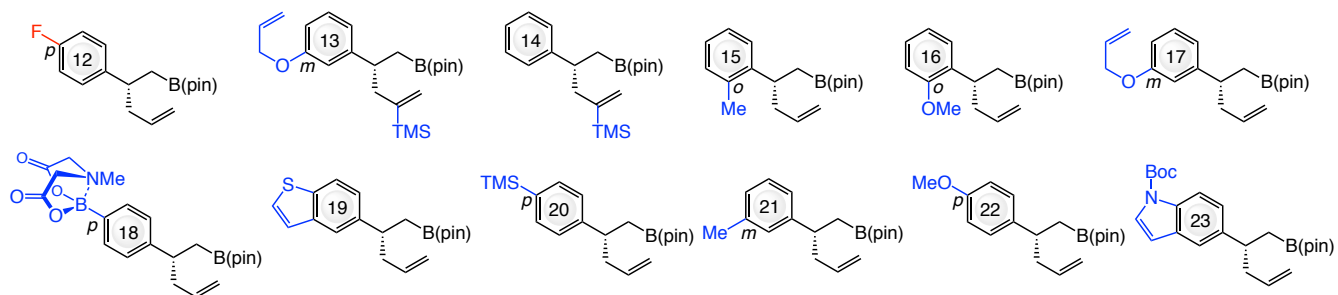

## 18. Density Functional Theory (DFT) Calculations

**(Please Note:** In the following section, the term Cu–rev is synonymous with the term Cu–iso used above.)

DFT computations<sup>28</sup> were performed with the Gaussian 09 suite of programs<sup>29</sup>. Geometries were optimized with density functional  $\omega$ B97XD<sup>30</sup> and the Def2SVP basis set<sup>31</sup>. The effect of a polar reaction medium (tetrahydrofuran, THF) was approximated by means of the SMD solvation model<sup>32</sup>. Stationary points were probed through vibrational analysis and Gibbs free energy corrections were performed under standard conditions (298.15 K, 1.0 atm). Intrinsic reaction coordinate (IRC) calculations have been performed starting from selected transition states (**ts**) employing the L(ocal) Q(uadratic) A(pproximation) method, followed by subsequent optimization to obtain structures and energies for educt (**ed**) and product (**prod**) on either side of the transition state<sup>33</sup>. We furthermore probed the performance of various density functionals through single point energy calculations at the geometries optimized at the levels described above by means of the SMD solvation model<sup>32</sup> with THF as solvent and the larger Def2TZVPP<sup>31</sup> basis set. Since the correct density functional is not known we tested several state of the art approaches that have been developed over the past decade<sup>28,34</sup>:  $\omega$ B97XD<sup>30</sup>,

---

(28) For reviews on application of DFT calculations to the chemistry of transition metal complexes, see: (a) Cramer, C. J. & Truhlar, D. G. *Phys. Chem. Chem. Phys.* **11**, 10757–10816 (2009). (b) Grimme, S., Ehrlich, S. & Goerigk, L. *J. Comp. Chem.* **32**, 1456–1465 (2011). (c) Peverati, R. & Truhlar, D. G. *Phil. Trans. R. Soc. A* **372**:20120476 (2014).

(29) Frisch, M. J.; Trucks, G. W.; Schlegel, H. B.; Scuseria, G. E.; Robb, M. A.; Cheeseman, J. R.; Scalmani, G.; Barone, V.; Mennucci, B.; Petersson, G. A.; Nakatsuji, H.; Caricato, M.; Li, X.; Hratchian, H. P.; Izmaylov, A. F.; Bloino, J.; Zheng, G.; Sonnenberg, J. L.; Hada, M.; Ehara, M.; Toyota, K.; Fukuda, R.; Hasegawa, J.; Ishida, M.; Nakajima, T.; Honda, Y.; Kitao, O.; Nakai, H.; Vreven, T.; Montgomery, Jr., J. A.; Peralta, J. E.; Ogliaro, F.; Bearpark, M.; Heyd, J. J.; Brothers, E.; Kudin, K. N.; Staroverov, V. N.; Kobayashi, R.; Normand, J.; Raghavachari, K.; Rendell, A.; Burant, J. C.; Iyengar, S. S.; Tomasi, J.; Cossi, M.; Rega, N.; Millam, J. M.; Klene, M.; Knox, J. E.; Cross, J. B.; Bakken, V.; Adamo, C.; Jaramillo, J.; Gomperts, R.; Stratmann, R. E.; Yazyev, O.; Austin, A. J.; Cammi, R.; Pomelli, C.; Ochterski, J. W.; Martin, R. L.; Morokuma, K.; Zakrzewski, V. G.; Voth, G. A.; Salvador, P.; Dannenberg, J. J.; Dapprich, S.; Daniels, A. D.; Farkas, Ö.; Foresman, J. B.; Ortiz, J. V.; Cioslowski, J. & Fox, D. J. *Gaussian 09, Revision D.01*, Gaussian, Inc., Wallingford CT (2009).

(30) Chai, J.-D. & Head-Gordon, M. *Phys. Chem. Chem. Phys.*, **10**, 6615–6620 (2008).

(31) Weigend, F. & Ahlrichs, R. *Phys. Chem. Chem. Phys.* **2005**, 7, 3297–3305.

(32) Marenich, A. V.; Cramer, C. J. & Truhlar, D. G. *J. Phys. Chem. B* **113**, 6378–6396 (2009).

(33) (a) Page, M. & McIver Jr., J. W. *J. Chem. Phys.* **88**, 922–935 (1988). (b) Page, M., Doubleday Jr., C. & McIver Jr., J. W. *J. Chem. Phys.* **93**, 5634–5642 (1990).

(34) For selected examples highlighting the importance of including treatment of dispersion interactions in modeling olefin metathesis reactions promoted by Ru carbene complexes, see: (a) Torker, S., Merki, D. & Chen, P. *J. Am. Chem. Soc.* **130**, 4808–4814 (2008). (b) Minenkov, Y., Occhipinti, G., Singstad, A. & Jensen, V. R. *Dalton Trans.* **41**, 5526–5541 (2012). (c) Minenkov, Y., Occhipinti, G. & Jensen, V. R. *Organometallics* **32**, 2099–2111 (2013). (d) Torker, S., Khan, R. K. M. & Hoveyda, A. H. *J. Am. Chem. Soc.* **136**, 3439–3455 (2014). (e) Khan, R. K. M., Torker, S. & Hoveyda, A. H. *J. Am. Chem. Soc.* **136**, 14337–14340 (2014). (f) Torker, S., Koh, M. J., Khan, R. K. M. & Hoveyda, A. H. *Organometallics* **35**, 543–562 (2016). (g) Mikus, M. S., Torker, S. & Hoveyda, A. H. *Angew. Chem. Int. Ed.* **55**, 4997–5002 (2016). For modeling allyl

M06<sup>35</sup>, MN12SX<sup>36</sup>, MN12L<sup>36</sup>, M06L<sup>35</sup>, BP86-D3BJ<sup>28b,37</sup> and PBE0-D3BJ<sup>28b,38</sup> (Figure 1–9). Electronic and Gibbs free energies for Figure 1–10 are provided in Section 19 and the entries used as the basis for Figures 6–7 are highlighted in red. A file for convenient viewing of computed geometries with the program Mercury 3.3 is appended as separate “coordinates.xyz” file in Section 20<sup>39</sup>.

**Scheme 14.** General reaction sequence for Cu–B(pin) addition/allylic substitution including competitive side reactions ( $\beta$ -H or Cu–H elimination/re-addition).

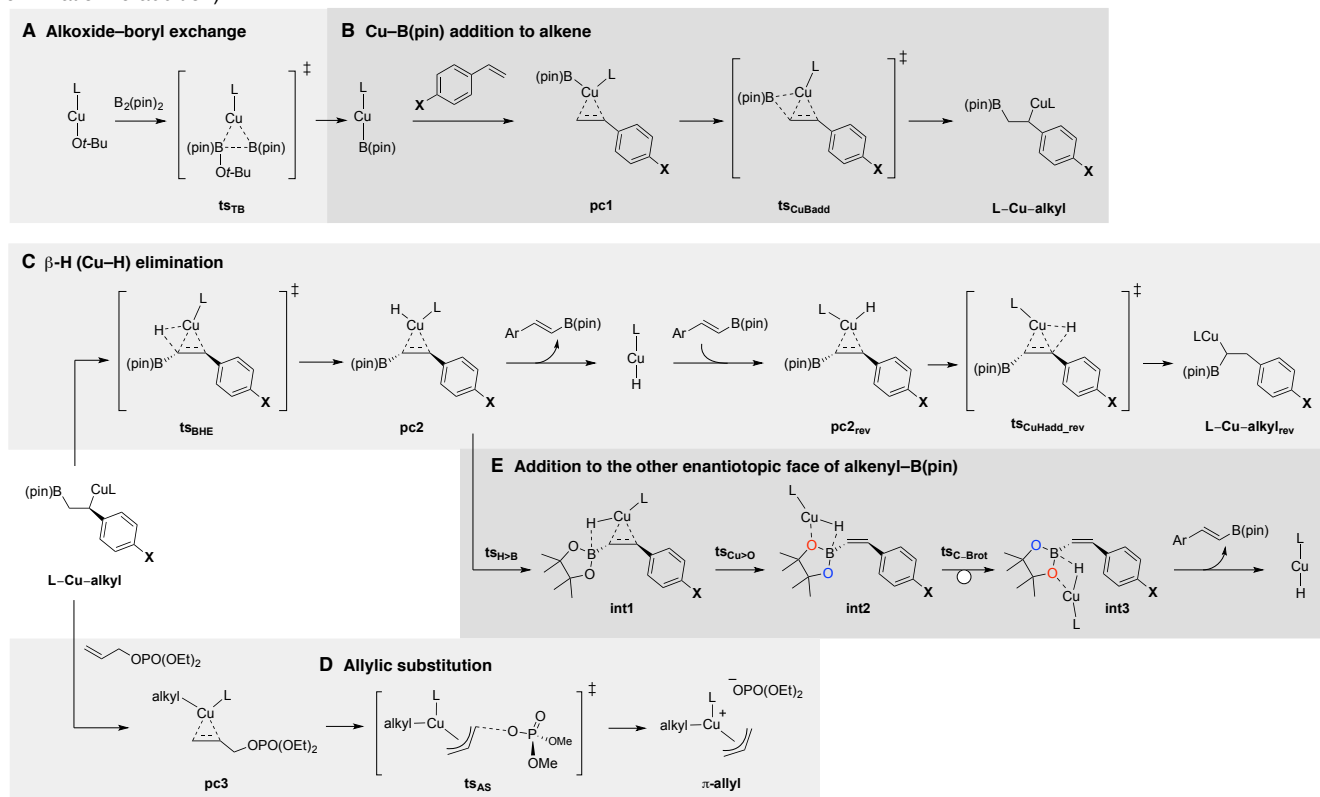

Abbreviations: **TB**, transborylation [conversion of Cu–alkoxide to Cu–B(pin)]; **BHE**,  $\beta$ -hydride (or Cu–H) elimination; **pc**,  $\pi$ -complex; **ts<sub>H>B</sub>**, transition state for hydride migration to boron; **ts<sub>Cu>O</sub>**, transition state for Cu migration to oxygen on Bpin; **ts<sub>c-Brot</sub>**, transition state for C–B bond rotation; **ts<sub>CuHadd\_rev</sub>**, transition state Cu–H addition leading to Cu–alkyl<sub>rev</sub> species with opposite regiochemistry; **int**, intermediate; **Cu–H**, linear Cu–hydride species.

addition to CF<sub>3</sub>-ketones, see: (h) Lee, K., Silverio, D. L., Torker, S., Robbins, D. W., Haeffner, F. & Hoveyda, A. H. *Nature Chem.* **8**, 768–777 (2016).

(35) Zhao, Y. & Truhlar, D. G. *Acc. Chem. Res.* **41**, 157–167 (2008).

(36) Peverati, R. & Truhlar, D. G. *Phys. Chem. Chem. Phys.* **14**, 16187–16191 (2012).

(37) (a) Becke, A. D. *Phys. Rev. A: At. Mol. Opt. Phys.* **38**, 3098–3100 (1988). (b) Perdew, J. P. & Yue, W. *Phys. Rev. B* **33**, 8800–8802 (1986).

(38) Adamo, C. & Barone, V. *J. Chem. Phys.* **110**, 6158–6169 (1999).

(39) Lichtenberger, D. L. & Gladysz, J. A. *Organometallics* **33**, 835–835 (2014). The “coordinates.xyz” file can be generated by copying all the coordinates in Section 20 into a text file without empty lines and changing the extension to “.xyz”.

## Background

Linear CuOt-Bu species that contain neutral ligands are labeled as **L-Cu-Ot-Bu** [L = bis-phosphine **L3a**, a model NHC (**NHCMe<sub>2</sub>**) and phosphine (**PMe<sub>3</sub>**), tetrahydrofuran (thf) or an aryl olefin with *para* substituent X]. Formation of linear **L-Cu-B(pin)** complex is expected to occur by reaction with B<sub>2</sub>(pin)<sub>2</sub> via transition state **ts<sub>TB</sub>**. In Figures 1–10, **ed** and **prod** denote the minima on either side of **ts<sub>TB</sub>**, which was obtained by IRC calculations and subsequent optimization. Complex **L-Cu-B(pin)** undergoes Cu-B(pin) addition through the following sequence: **pc1** → **ts<sub>CuBadd</sub>** → **L-Cu-alkyl**. Complex **L-Cu-alkyl** can either participate in an allylic substitution reaction (**pc3** → **ts<sub>AS</sub>** → **π-allyl**) or Cu-H elimination via transition state **ts<sub>BHE</sub>** to generate π-complex **pc2**. Upon dissociation of the alkenyl-B(pin) species linear **L-Cu-H** is formed, which might then re-add with the opposite site selectivity [Cu at the carbon bearing the B(pin) unit] to form alkylcopper species **L-Cu-alkyl<sub>rev</sub>** (**pc2<sub>rev</sub>** → **ts<sub>CuHadd\_rev</sub>**).

## Questions to be Addressed

**Issues concerning the DFT calculations.** The difficulty associated with modeling reactions that contain multiple ionic species notwithstanding, a number of DFT calculations were performed. Comparison of absolute free energies of transition states with different character (e.g., **ts<sub>CuBadd</sub>** vs. **ts<sub>AS</sub>**) is challenging and probably subject to somewhat large relative errors. This is particularly an issue with transition state structures that may be envisioned for the allylic substitution (AS) step, such as those where the phosphate moiety is cleaved without the assistance of Na chelation and those where Na coordination is involved (but not necessarily intramolecular, see below).

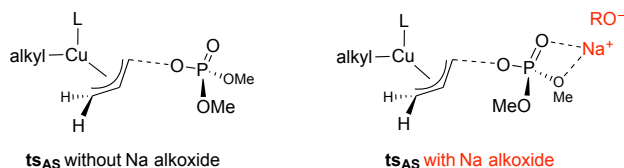

**Specific questions investigated.** The major goal of these studies was to address the following questions:

- (1) What is the most plausible stereochemical model for L-Cu-B(pin) addition to an aryl olefin with L being bis-phosphine ligand **L3a**?
- (2) What are the most likely steps where the presence of an electron-deficient aryl olefin can lead to a lowering of enantioselectivity? Is it possible that electron-deficient alkene might be capable of activating Cu-Ot-Bu clusters, breaking them into smaller, more reactive species, due to their ability to provide stronger back-bonding (lower energy π\*)?
- (3) Alternatively, does an electron-deficient aryl olefin allow for a more competitive Cu-B(pin) addition with an achiral complex?
- (4) Why does the allylic substitution step seem to be more difficult with bis-phosphine **L3a**, particularly with bulkier allyl electrophiles? Does this allow for alternative reaction pathways to compete, leading to lower e.r. (enantiomeric ratio)?

- (5) Is  $\beta$ -H (Cu-H) elimination within the alkylcopper intermediates critical to enantioselectivity fluctuations and, if so, is it followed by subsequent Cu-H re-addition from the opposite enantiotopic face?
- (6) What is the basis for reactions, regardless of whether they contain an NHC or a phosphine ligand, being highly  $S_N2'$ -selective?
- (7) Does displacement of the bis-phosphine ligand by an aryl olefin or a Lewis basic solvent molecule (i.e., thf) take place to a degree that influences the observed e.r. fluctuations? This might have several advantages: Although phosphines are better donors (compared to olefins) and should therefore bind more strongly to the metal center, the smaller size and  $\pi$ -accepting properties of styrenes could exert a positive influence on the rate of C-B bond formation. However, a competitive and non-selective Cu-B addition pathway starting from **L3a(9 $\alpha$ )-Cu-B(pin)** would likely be second-order in the alkene (i.e., one styrene needed for displacement of **L3a** and another one is involved in Cu-B addition; Scheme 15). See the discussion associated with Figures 6–7 below.

**Scheme 15.** Enantioselective Cu-B(pin) addition and competitive bimolecular reaction.

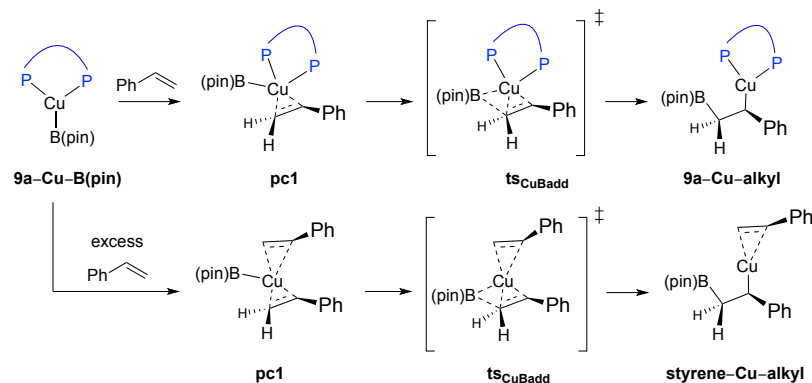

### Stereochemical Model for Addition of **L3a-Cu-B(pin)** to an Aryl Olefin (Figure 1.1–1.2)

The free energy surface for Cu-B(pin) addition with ligand **L3a** at the M06/Def2TZVPP<sub>THF(SMD)</sub>// $\omega$ B97XD/Def2SVP<sub>THF(SMD)</sub> level are shown in Figure 1.1. Reaction of **L3a-Cu-Ot-Bu** generates **L3a-Cu-B(pin)** irreversibly ( $G_{rel} = 0.0$  kcal/mol) via transition state **ts<sub>TB</sub>** ( $G_{rel} = 36.3$  kcal/mol). Two modes of addition were considered that might afford the major diastereomer of **L3a-Cu-alkyl** complex [**major01** with the phenyl group on styrene pointing to the front ( $G_{rel} = 16.9$  kcal/mol) and **major02** with the phenyl ring facing to the rear ( $G_{rel} = 23.4$  kcal/mol); Figure 1.1]. The same applies to the pathways leading to the minor diastereomer of **L3a-Cu-alkyl** [**minor01** ( $G_{rel} = 18.9$  kcal/mol) and **minor02** ( $G_{rel} = 21.8$  kcal/mol)]. The computed energies are in agreement with the experimental observations. Investigation with other density functionals ( $\omega$ B97XD, MN12SX, MN12L, M06L, BP86-D3BJ and PBE0-D3BJ) revealed qualitatively similar trends albeit with some differences in the absolute energies (e.g., with BP86 including Grimme's D3 dispersion the reaction barriers relative to **L3a-Cu-B(pin)** are underestimated, likely due to overestimation of dispersion; 4.1 kcal/mol for **ts<sub>CuBadd\_major01</sub>**; Figure 1.2).

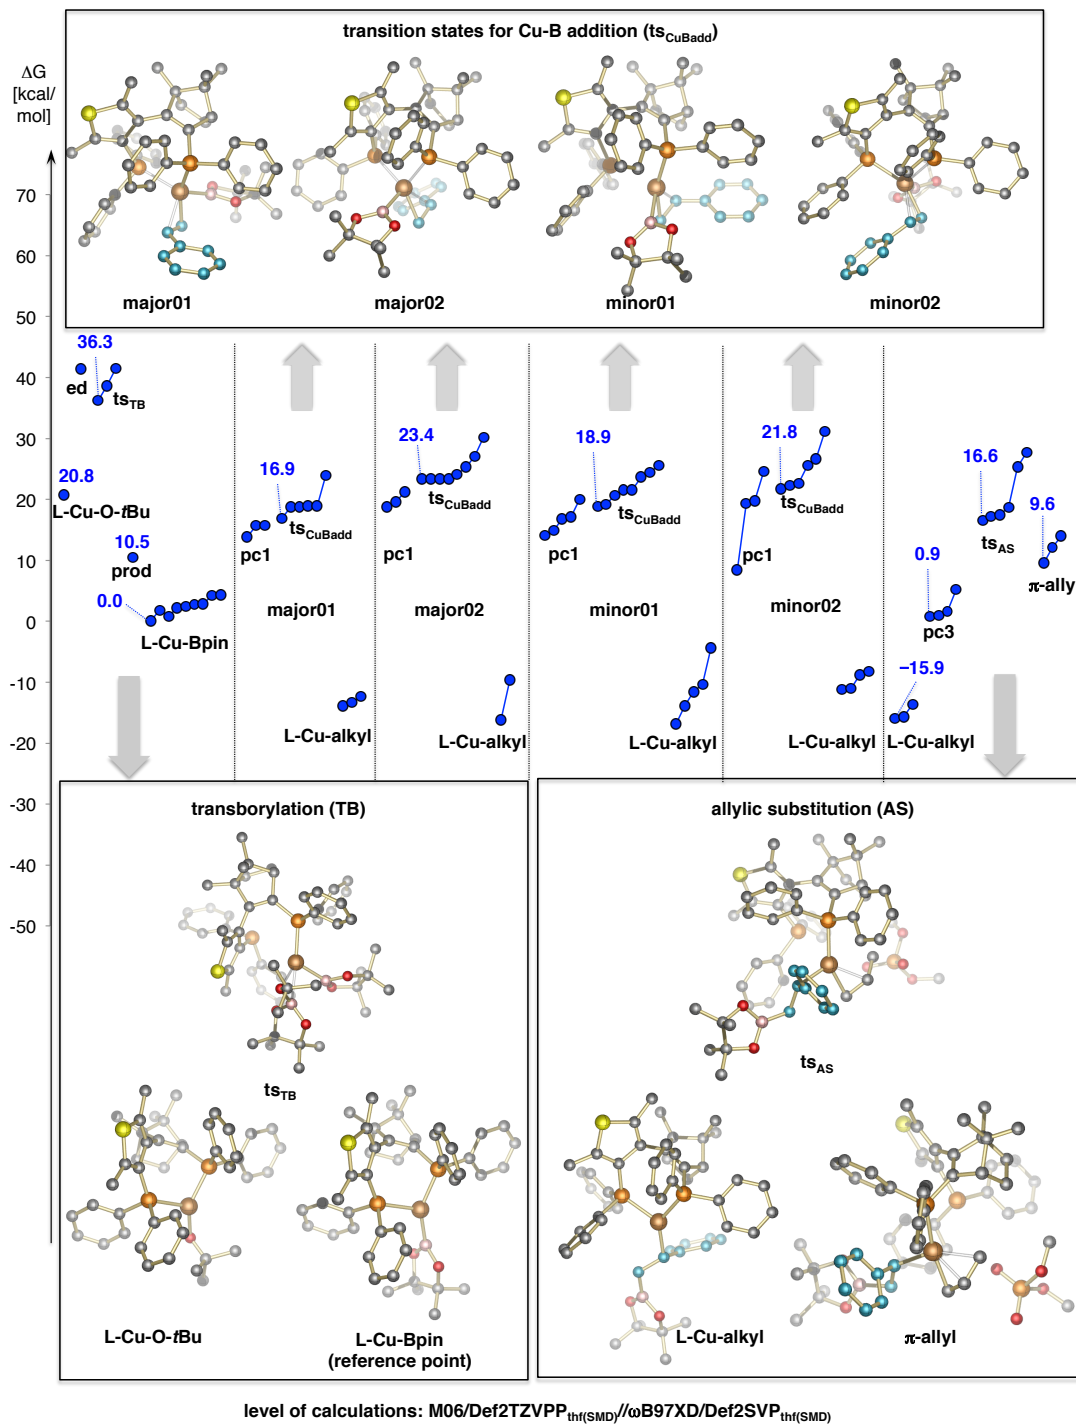

**Figure 1.1.** Free energy surfaces for the enantioselective Cu-B(pin) addition (CuBadd)/allylic substitution (AS) sequence with bis-phosphine **L3a** at the M06/DefTZVPP<sub>thf(SMD)</sub>//ωB97XD/Def2SVP<sub>thf(SMD)</sub> level. Several conformers are shown for the two modes of addition leading to the major (**major01** and **major02**) and the minor enantiomer (**minor01** and **minor02**). The free energies have been referenced to the most stable **L3a-Cu-B(pin)** conformer. Only the AS transition states leading to the major enantiomer are shown. The computed structures of the lowest conformer for a given species are displayed. Abbreviations: **TB**, transborylation [conversion of Cu-alkoxide to Cu-B(pin)]; **pc**, π-complex.



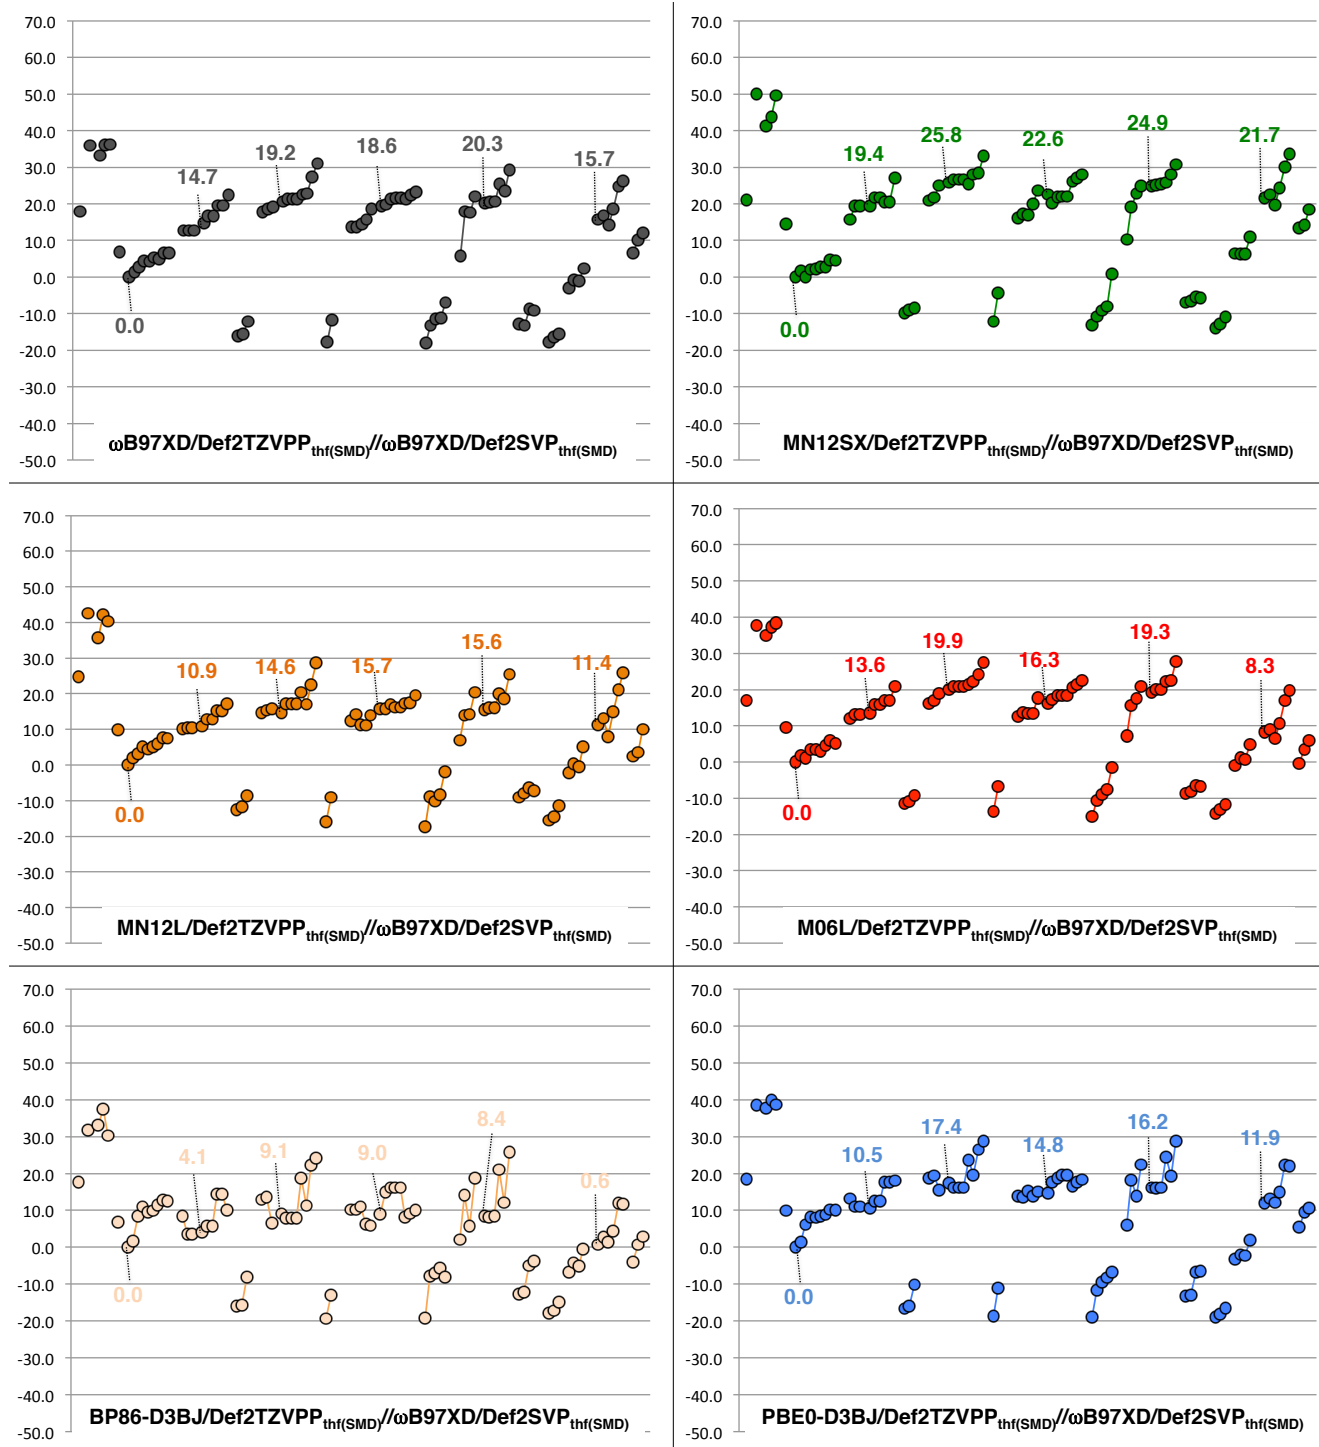

**Figure 1.2.** Free energy surfaces for the enantioselective Cu–B(pin) addition (CuBadd)/allylic substitution (AS) sequence with ligand **L3a** at the M06/DefTZVPP<sub>thf(SMD)</sub>//ωB97XD/Def2SVP<sub>thf(SMD)</sub> level. Several conformers are shown for the two modes of addition that lead to the major (**major01** and **major02**) as well as the minor enantiomer (**minor01** and **minor02**). The free energies have been referenced to the most stable **L3a–Cu–B(pin)** conformer; only AS transition states leading to the major enantiomer are shown; the computed structures of the lowest conformer for a given species are displayed. Abbreviations: **TB** [conversion of Cu–alkoxide to Cu–B(pin)], transborylation; **pc**,  $\pi$ -complex.

Following Cu–B(pin) addition, the major alkylcopper diastereomer may undergo allylic substitution via  $\text{ts}_{\text{AS}}$  ( $G_{\text{rel}} = 16.6$  kcal/mol for the most accessible conformer)<sup>40,41,42,43</sup>. Due to higher conformational complexity of  $\text{ts}_{\text{AS}}$  compared to  $\text{ts}_{\text{CuBadd}}$  we did not perform calculations for allylic substitution with the minor alkylcopper diastereomer; we judged that the energy difference relative to the major pathway would be masked by significant uncertainty.

Several structural features are worth highlighting, which explain why the major enantiomer is generated preferentially and shed light on coordination chemistry of the bis-phosphine ligands (Scheme 16). In the pathway leading to the major alkylcopper enantiomer there is, in addition to several edge-to-face aromatic interactions<sup>44</sup>, a weak H-bonding association between one of the oxygen atoms of the B(pin) moiety and an *ortho*-hydrogen atom of an arylphosphine ring (Scheme 16a). Rather than consider this H-bonding interaction as purely attractive, this geometry may be viewed as the least repulsive; in other words, there is probably minimal electron density on that particular *ortho* proton on the phenyl ring, which favors propinquity with the B(pin) moiety.

The presence of the four *meta*-methyl groups of the diarylphosphine moieties in bis-phosphine **L3c** causes enantioselectivity reversal (20:80 e.r.); we propose this is because the aforementioned weak H-bonding interaction is sterically and electronically disrupted. It is also likely that the phosphine ligand adopts a more flexible coordination mode.

---

(40) For mechanistic considerations regarding nucleophilic reaction promoted by Cu(I) species, see: Yoshikai, N. & Nakamura, E. *Chem. Rev.* **112**, 2339–2372 (2012). For a computational report regarding the nucleophilicity of d-orbitals in Cu-alkyl species, see: Mori, S., Hirai, A., Nakamura, M. & Nakamura, E. *Tetrahedron* **56**, 2805–2809 (2000).

(41) For an early computational report regarding site selectivity in allylic substitution (AS) reactions involving anionic heterocuprates, see: (a) Yoshikai, N., Zhang, S.-L. & Nakamura, E. *J. Am. Chem. Soc.* **130**, 12862–12863 (2008). For a report discussing regioselectivity during reductive elimination from Cu(III)  $\pi$ -allyl species, see: (b) Yamanaka, M., Kato, S. & Nakamura, E. *J. Am. Chem. Soc.* **126**, 6287–6293 (2004).

(42) For a discussion of enantioselective allylic substitution promoted by Cu–R entities bearing NHC ligands with a pendant sulfonate group, see: (a) Shi, Y., Jung, B., Torker, S. & Hoveyda, A. H. *J. Am. Chem. Soc.* **137**, 8948–8964 (2015). (b) Lee, J., Torker, S. & Hoveyda, A. H. *Angew. Chem. Int. Ed.* **56**, 821–826 (2017).

(43) For additional stereochemical models regarding 1,4- or 1,6-additions to enoates or dienates that also suggest the involvement of an intramolecular coordination of the substrate to a metal counterion, see: (a) Meng, F., Li, X., Torker, S., Shi, Y., Shen, X. & Hoveyda, A. H. *Nature* **537**, 387–393 (2016). (b) Li, X., Meng, F., Torker, S., Shi, Y. & Hoveyda, A. H. *Angew. Chem. Int. Ed.* **55**, 9997–10002 (2016).

(44) (a) Quan, R. W., Li Z. & Jacobsen, E. N. *J. Am. Chem. Soc.* **118**, 8156–8157 (1996). For a review on aromatic interactions, see: (b) Hunter, C. A., Lawson, K. R., Perkins, J. & Urch, C. J. *J. Chem. Soc., Perkin Trans. 2* 651–669 (2001).

**Scheme 16.** Key structural features in the transition states for Cu–B(pin) addition and allylic substitution with ligand **L3a**.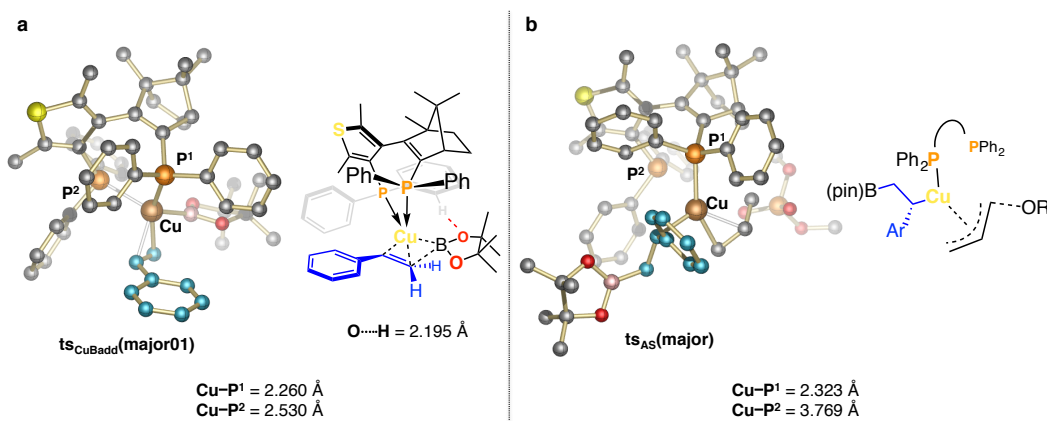

While bis-phosphine **L3a** probably coordinates to Cu in a bidentate manner during Cu–B(pin) addition (with a dissymmetric coordination of the two phosphine atoms; Cu–P<sup>1</sup> = 2.260 Å vs. Cu–P<sup>2</sup> = 2.530 Å; Scheme 16a), its coordination mode is monodentate during the allylic substitution process; this adjustment is required for accommodating the square planar geometry involving a  $\pi$ -allyl group (Scheme 16b). One of the phosphine atoms may therefore be displaced from Cu as reflected in a comparatively long Cu–P<sup>2</sup> distance (3.769 Å; Scheme 16b). The additional and undesired enthalpic penalty associated with cleavage of the Cu–P<sup>2</sup> bond implies that allylic substitution reactions, particularly those with sterically hindered electrophiles, are challenging and can allow side reactions to become more competitive.

### Influence of Electronic Attributes of Aryl Olefins on the Barriers for Cu–B(pin) Addition, $\beta$ -Hydride (Cu–H) Elimination and Allylic Substitution (Figures 2–3)

To gain insight vis-à-vis the impact of electronic alterations of aryl olefins, we probed the free energy surface for Cu–B(pin) addition with model NHC or phosphine ligands at the M06/Def2TZVPP<sub>thf(SMD)</sub>// $\omega$ B97XD/ Def2SVP<sub>thf(SMD)</sub> level (Figure 2.1–2.2 for L = **NHCMe<sub>2</sub>** and Figure 3.1–3.2 for L = **PMe<sub>3</sub>**). We considered examining a model system to be more effective approach because the key electronic effects could be masked by large conformational complexity. We have referenced the energies relative to **L3a–Cu–B(pin)** and, as a result, the free energies in Figure 2.1 include that needed for displacement of the neutral bis-phosphine ligand [i.e., **L3a–Cu–B(pin)** + **Me<sub>2</sub>NHC** → **Me<sub>2</sub>NHC–Cu–B(pin)** + **L3a**].

Complex **Me<sub>2</sub>NHC–Cu–Ot-Bu** is likely monomeric (13.6 kcal/mol relative to **L3a–Cu–B(pin)**) compared to 16.7 kcal/mol for the derived dimer; blue curve in Figure 2.1); it reacts with B<sub>2</sub>(pin)<sub>2</sub> via transition state  $ts_{TB}$  (22.5 kcal/mol) to generate **Me<sub>2</sub>NHC–Cu–B(pin)**, which is 2.8 kcal/mol more stable relative to **L3a–Cu–B(pin)**, suggesting that **NHCMe<sub>2</sub>** coordinates more strongly to Cu than bis-phosphine **L3a**. **Me<sub>2</sub>NHC–Cu–B(pin)** reacts irreversibly with styrene (11.6 kcal/mol for  $ts_{CuBadd}$ ) to generate **Me<sub>2</sub>NHC–Cu–alkyl** species (–19.9 kcal/mol for the conformer obtained by IRC calculation/optimization). Complex **Me<sub>2</sub>NHC–Cu–alkyl** can either undergo Cu–H elimination via  $ts_{BHE}$  (5.1 kcal/mol) or allylic substitution (1.7 kcal/mol for  $ts_{AS}$ ). Although these data suggest that reaction with the allyl phosphate ( $ts_{AS}$ ) is more favorable than formation of the alkenyl–B(pin) ( $ts_{BHE}$ ),

a more rigorous estimate of the relationship between  $\mathbf{ts}_{\text{BHE}}$  and  $\mathbf{ts}_{\text{AS}}$  would be difficult to establish. Firstly, unimolecular as opposed to bimolecular processes will show different dependencies on concentration. Secondly, as already mentioned, the precise identity of  $\mathbf{ts}_{\text{AS}}$  is probably unknown, although a structure resembling a  $\pi$ -allyl species should likely be entertained<sup>40,41</sup>.

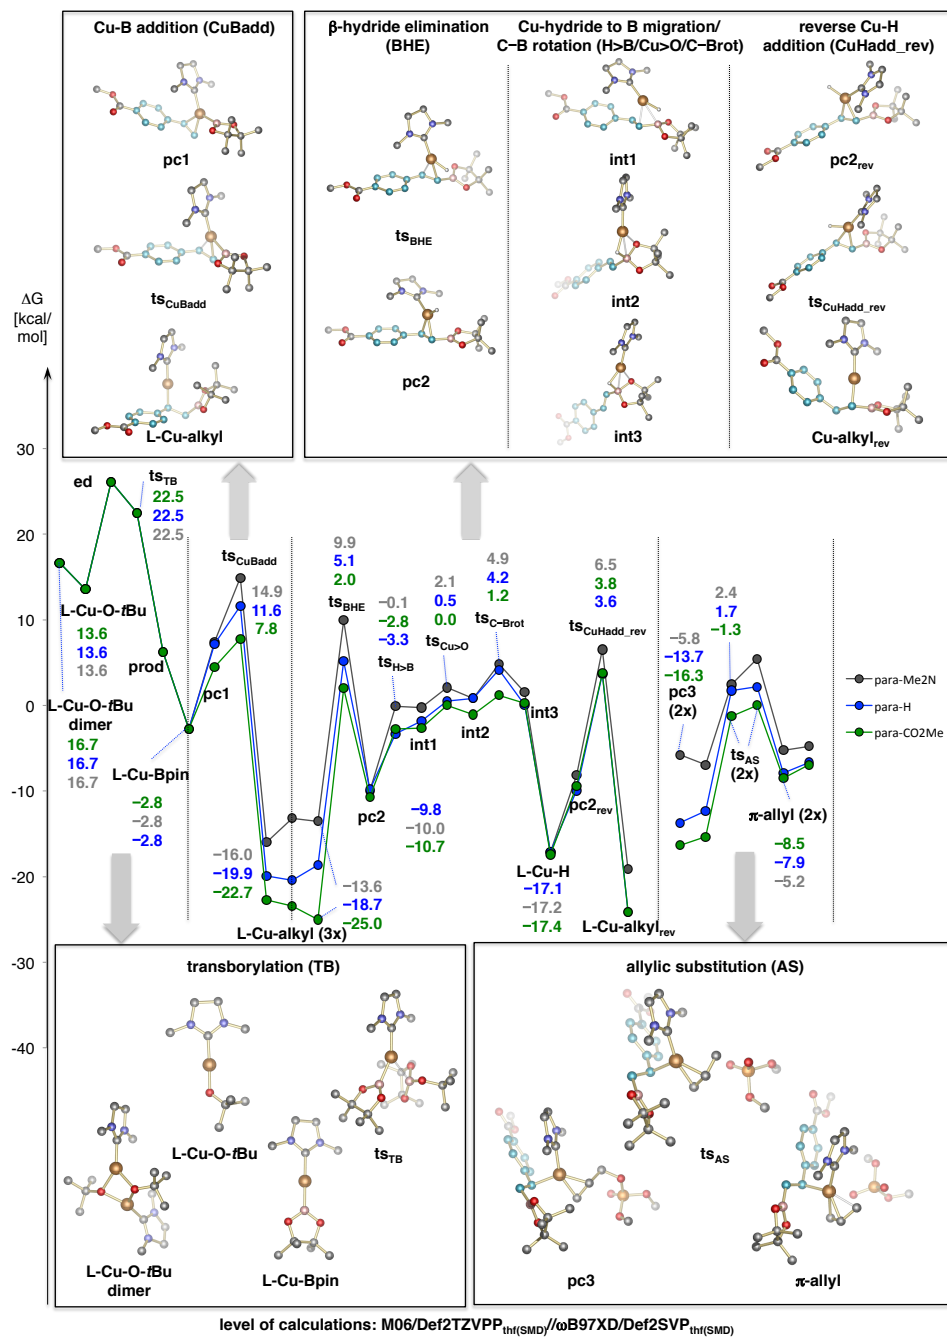

**Figure 2.1.** Free energy surfaces for the enantioselective Cu-B(pin) addition (CuBadd)/allylic substitution (AS) sequence with a model NHC ligand (NHCMe<sub>2</sub>) for reaction with various aryl olefins (*p*-Me<sub>2</sub>N, grey; *p*-H, blue; *p*-CO<sub>2</sub>Me, green) at the M06/DefTZVPP<sub>thf(SMD)</sub>// $\omega$ B97XD/Def2SVP<sub>thf(SMD)</sub> level. Several conformers are shown for  $ts_{AS}$  and L-Cu-alkyl. The free energies have been referenced to the most stable L3a-Cu-B(pin) conformer, which takes into account the free energy for ligand displacement (cf. Figure 6.1); the computed structures for L = *p*-CO<sub>2</sub>Me-styrene are displayed. Abbreviations: TB, transborylation [conversion of Cu-alkoxide to Cu-B(pin)]; BHE,  $\beta$ -hydride (or Cu-H) elimination; pc,  $\pi$ -complex;  $ts_{H\rightarrow B}$ , transition state for hydride migration to boron;  $ts_{Cu>O}$ , transition state for Cu migration to oxygen on Bpin;  $ts_{C-Brot}$ , transition state for C-B bond rotation;  $ts_{CuHadd\_rev}$ , transition state Cu-H addition leading to Cu-alkyl<sub>rev</sub> species with opposite regiochemistry; int, intermediate; Cu-H, linear Cu-hydride species.

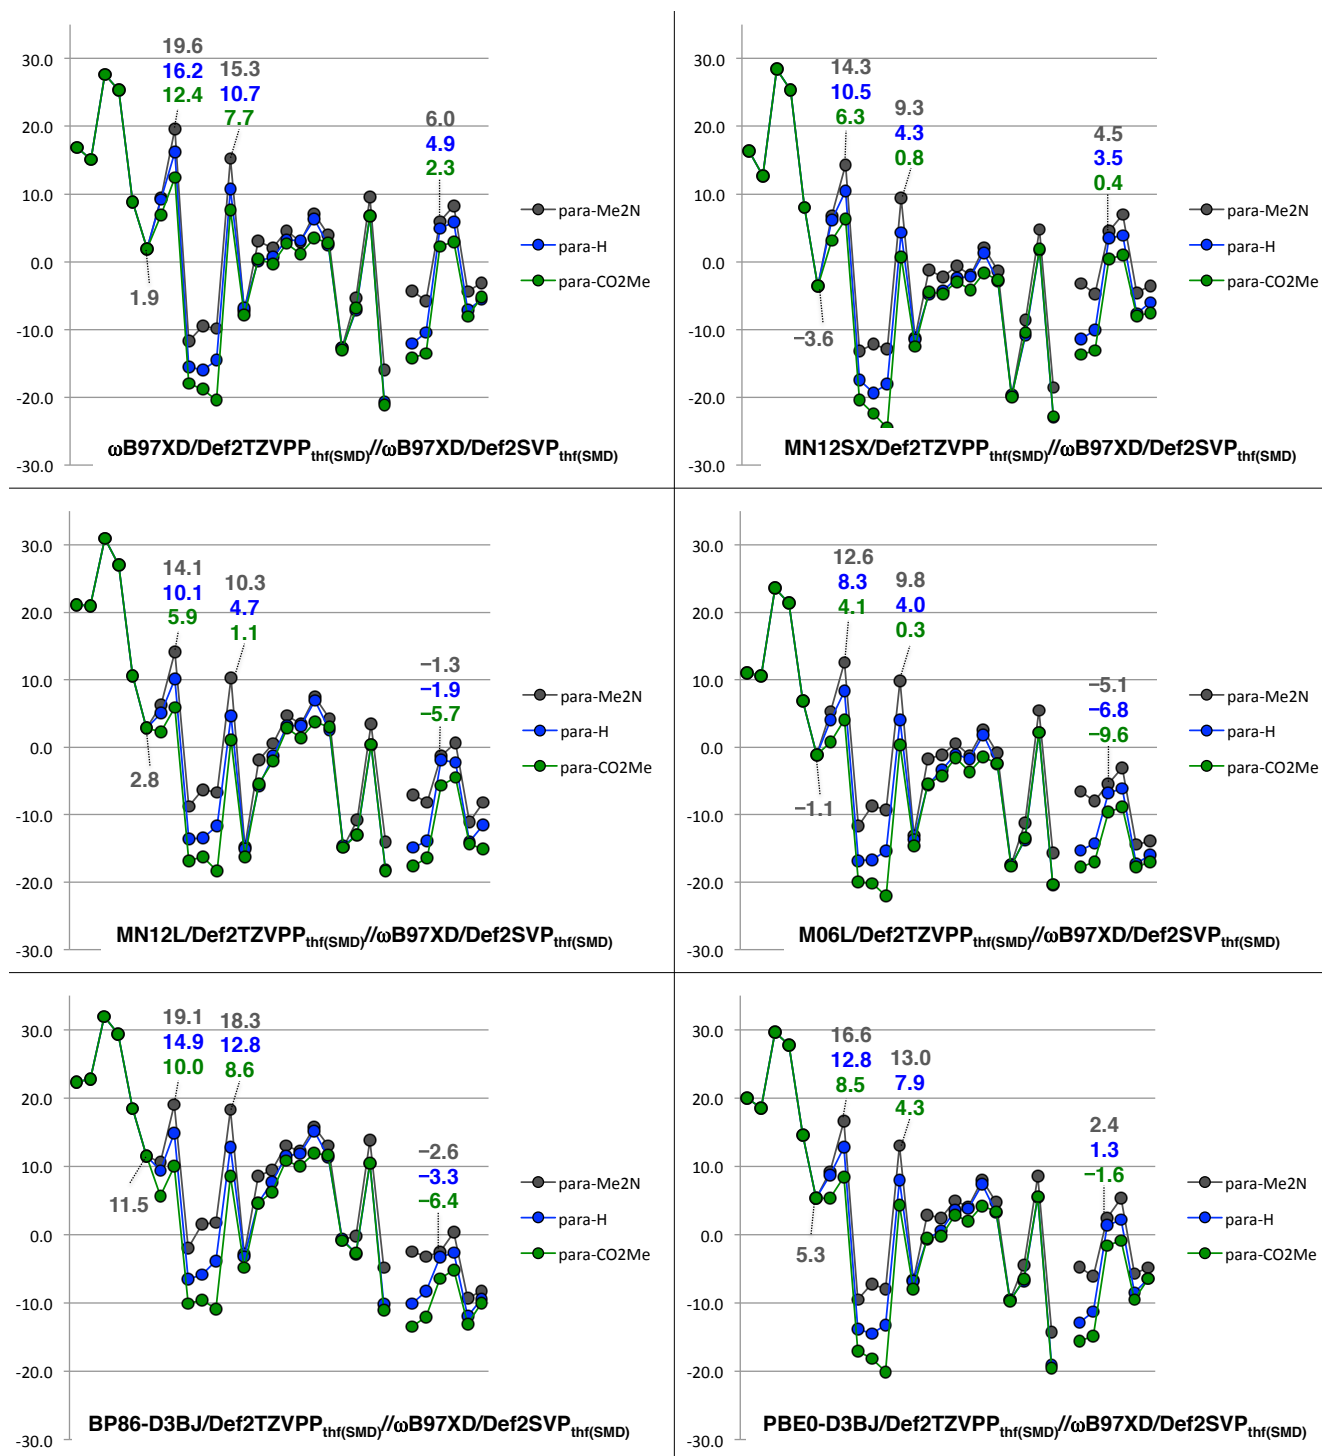

**Figure 2.2.** Free energy surfaces for the enantioselective Cu-B(pin) addition (CuBadd)/allylic substitution (AS) sequence with a model NHC ligand (NHCMe<sub>2</sub>) for reaction with various styrene derivatives (*p*-Me<sub>2</sub>N, grey; *p*-H (styrene), blue; *p*-CO<sub>2</sub>Me, green) with various density functionals after optimization with omegaB97XD/Def2SVP<sub>thf(SMD)</sub>. For details, see Figure 2.1.

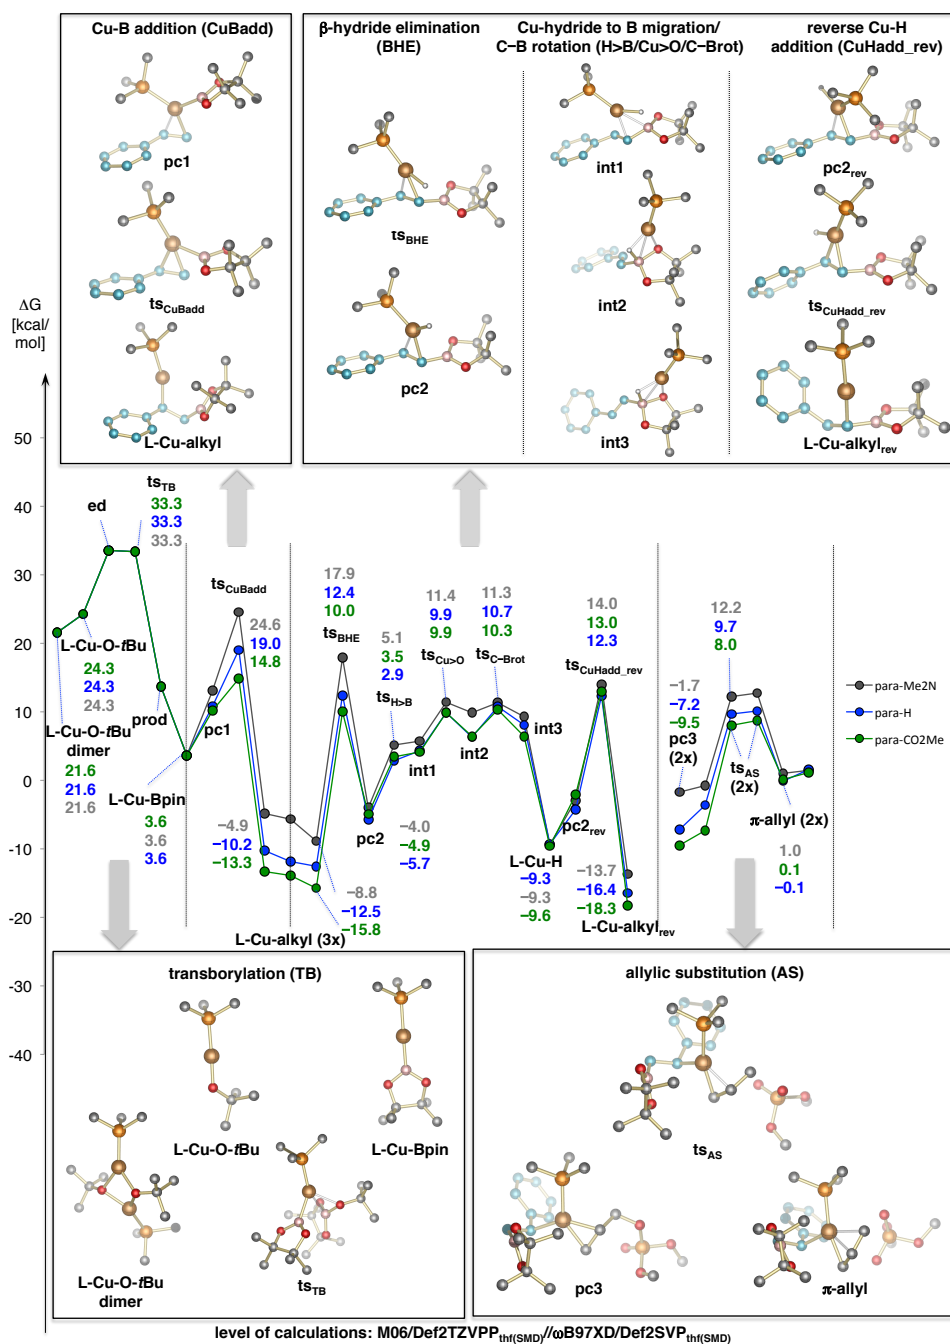

**Figure 3.1.** Free energy surfaces for the enantioselective Cu–B(pin) addition (CuBadd)/allylic substitution (AS) sequence with a model phosphine ligand ( $\text{PMe}_3$ ) for reaction with various aryl olefins ( $p\text{-Me}_2\text{N}$ , grey;  $p\text{-H}$  (styrene), blue;  $p\text{-CO}_2\text{Me}$ , green) at the M06/DefTZVPP<sub>thf(SMD)</sub>/ωB97XD/Def2SVP<sub>thf(SMD)</sub> level. Several conformers are shown for  $\text{ts}_{\text{AS}}$  and L–Cu–alkyl. The free energies have been referenced to the most stable L3a–Cu–Bpin conformer, which takes into account the free energy for ligand displacement (see Figure 6.1); the computed structures for L =  $p\text{-CO}_2\text{Me}$ -styrene are displayed. Abbreviations: **TB**, transborylation [conversion of Cu–alkoxide to Cu–B(pin)]; **BHE**,  $\beta$ -hydride (or Cu–H) elimination; **pc**,  $\pi$ -complex; **ts<sub>H>B</sub>**, transition state for hydride migration to boron; **ts<sub>Cu>O</sub>**, transition state for Cu migration to oxygen on Bpin; **ts<sub>C-Brot</sub>**, transition state for C–B bond rotation; **ts<sub>CuHadd\_rev</sub>**, transition state Cu–H addition leading to Cu–alkyl<sub>rev</sub> species with reversal of regiochemistry; **int**, intermediate; **Cu–H**, linear Cu–hydride species.

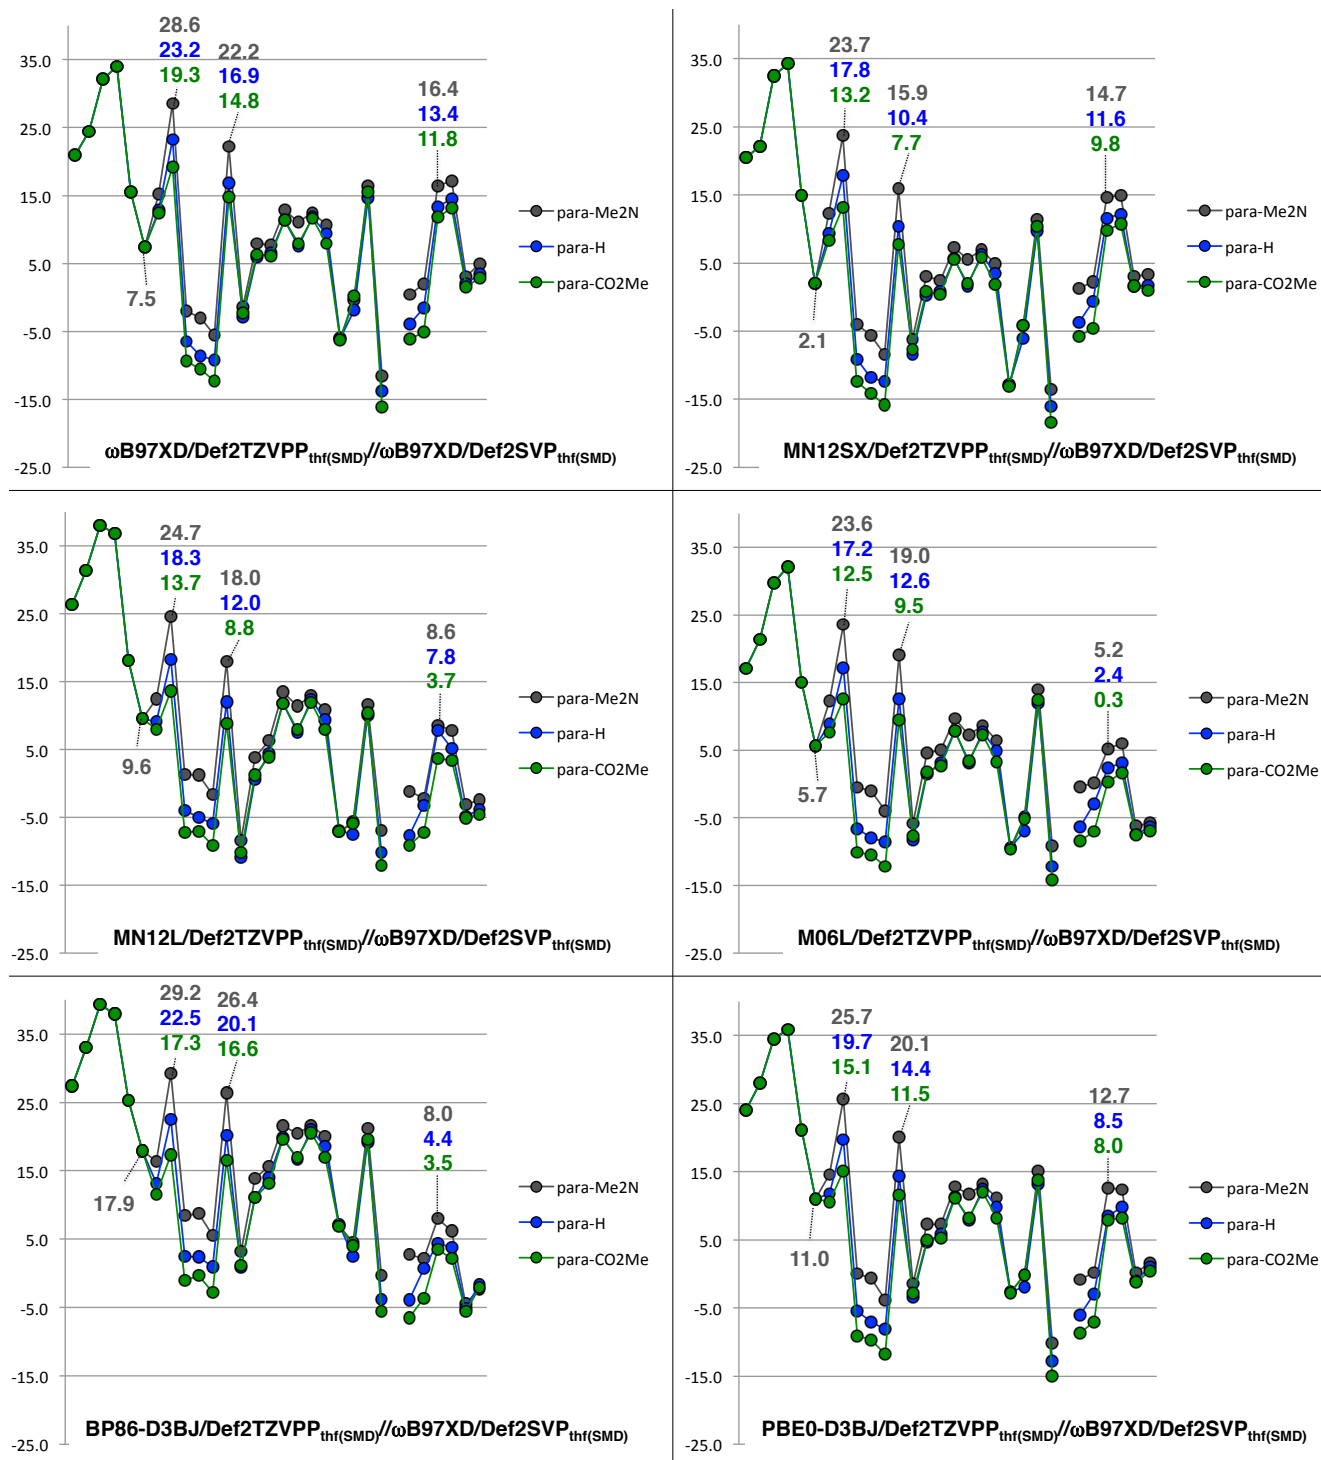

**Figure 3.2.** Free energy surfaces for the enantioselective Cu-B(pin) addition (CuBadd)/allylic substitution (AS) sequence with a model phosphine ligand (PMe<sub>3</sub>) for reaction with various aryl olefins (*p*-Me<sub>2</sub>N, grey; *p*-H (styrene), blue; *p*-CO<sub>2</sub>Me, green) with various density functionals after optimization with ωB97XD/Def2SVP<sub>thf(SMD)</sub>. For details, see Figure 3.1.



**Feasibility of Cu–H re-addition as a possible reason for lowering of *e.r.*** In search of a rationale regarding the diminution in enantioselectivity when allyl phosphate concentration is decreased, we first considered a Cu–H elimination/re-addition sequence. Nonetheless, Cu–H addition to the opposite enantiotopic face of the *same* alkenyl–B(pin) molecule seems unlikely, especially considering the substantial amounts of unreacted aryl olefin present.

Nevertheless, one feasible mechanism for Cu–H re-addition to the opposite face of the alkenyl–B(pin) without dissociation from that olefin might be as follows: migration of **L–Cu–H** from the double bond in **pc2** toward boron to generate borate<sup>45</sup> species **int2** (Figure 2.1), which would allow for rotation around the C–B bond (**ts**<sub>Cu–Brot</sub>, 3.6 kcal/mol) and addition to the opposite face of the olefin. Computational studies reveal that such a pathway would be energetically much less favored compared to formation of the separated entities [i.e., **L–Cu–H** + alkenyl–B(pin), –17.1 kcal/mol]. The absence of a stable adduct with the linear **L–Cu–H** species suggests that olefin exchange followed by Cu–H addition to a different olefin is preferred. What is more, we have been unable to locate a stable adduct between **L–Cu–H** and the aromatic ring moiety of the model alkenyl–B(pin) complex. Unlike bent  $\beta$ -diketiminato-Cu species (shown below), reported to form isolable adducts with toluene<sup>45c</sup>, binding of a linear **L–Cu–H** species is unfavorable due to the energy required to distort the linear geometry (see Figure 10.1 for the **L–Cu–Me** species).

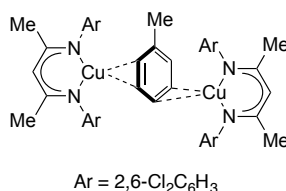

**Site Selectivity of Cu–H addition to an aryl-substituted alkenyl–B(pin) compound.** Cu–H addition to an alkenyl–B(pin) compound probably occurs with the opposite site selectivity compared to a monosubstituted aryl olefin (3.6 kcal/mol for **ts**<sub>CuHadd\_rev</sub> vs. 5.1 kcal/mol for **ts**<sub>BHE</sub>), leading to linear **NHCMe<sub>2</sub>–Cu–alkyl<sub>rev</sub>** species with the Cu atom bound to homobenzylic carbon bearing the Bpin group (Figure 2.1). The latter scenario has been verified through spectroscopic investigations (see NMR experiments, Section 14) with ligand **L3c** (i.e., **L3c–Cu–H** generation from PHMS and **L3c–Cu–Ot–Bu**, followed by addition to alkenyl–B(pin) substrates, synthesized independently, leads to generation of **L3c–Cu–alkyl<sub>rev</sub>**). The proposed site selectivity of Cu–H addition to an alkenyl–B(pin) is supported by the pioneering report of Sadighi<sup>46</sup>.

Next, we investigated the significance of the electronic properties of aryl olefin substrates. Cu–B(pin) addition is significantly more favored with *p*-methylesterstyrene (7.8 kcal/mol for **ts**<sub>CuBadd</sub>) compared to *p*-dimethylaminostyrene (14.9 kcal/mol), which is also reflected in the greater reaction exothermicity

(45) Copper–borohydride complexes are isolable compounds: (a) Lippard, S. J. & Melmed, K. M. *J. Am. Chem. Soc.* **89**, 3929–3930 (1967). (b) Lippard, S. J. & Ucko, D. A. *Inorg. Chem.* **7**, 1051–1056 (1968). (c) Nako, A. E., White, A. J. P. & Crimmin, M. R. *Dalton Trans.* **44**, 12530–12534 (2015). For a review on three-center/two-electron bonds in inorganic compounds, see: (d) Green, J. C., Green, M. L. H. & Parkin, G. *Chem. Commun.* **48**, 11481–11503 (2012).

(46) Laitar, D. S., Tsui, E. Y. & Sadighi, J. P. *Organometallics* **25**, 2405–2408 (2006).

(−25.0 kcal/mol for the lowest **L–Cu–alkyl** conformer; green curve in Figure 2.1). The positive effect of an electron-withdrawing aryl substituent on reaction rate suggests that background reactivity starting from phosphine-free Cu*Ot*-Bu species might be significantly higher than association of bis-phosphine **L3a** with the phosphine-free Cu–Bpin intermediate (see Figure 4a in the manuscript).

The effect of an electron-withdrawing substituent on rate (transition state effect) appears to be considerably larger than the ability of an electron-withdrawing styrene to stabilize various (Cu*Ot*-Bu)<sub>n</sub> species (ground state effect), ruling out styrene assisted deaggregation of oligomeric/polymeric (Cu*Ot*-Bu)<sub>n</sub> species as reason for e.r. fluctuations (see also the discussion associated with Figures 8–9 below). Furthermore, the decreased nucleophilicity of the **Me<sub>2</sub>NHC–Cu–alkyl** species derived from *p*-methylesterstyrene reduces the rate of allylic substitution (−1.3 kcal/mol for **ts<sub>AS</sub>**, which corresponds to a barrier of 26.3 kcal/mol relative to the most stable **Me<sub>2</sub>NHC–Cu–alkyl** species; green curve, Figure 2.1). In the case of the substrate bearing a *p*-dimethylaminoaryl moiety the energy of **ts<sub>AS</sub>** is 2.4 kcal/mol, corresponding to a barrier of only 18.4 kcal/mol (relative to the most stable **Me<sub>2</sub>NHC–Cu–alkyl** species; grey curve, Figure 2.1). The lower reactivity of the **Me<sub>2</sub>NHC–Cu–alkyl** species derived from *p*-methylesterstyrene towards allylic substitution (AS) renders the alternative Cu–H elimination pathway more competitive (2.0 kcal/mol for **ts<sub>BHE</sub>**, which is only 3.3 kcal/mol above **ts<sub>AS</sub>**). With *p*-dimethylaminoaryl system the energy difference between **ts<sub>BHE</sub>** and **ts<sub>AS</sub>** is larger (7.5 kcal/mol).

Similar trends are obtained when the calculations are performed in presence of a neutral **PMe<sub>3</sub>** model ligand (Figure 3 compared to L = **NHCMe<sub>2</sub>**, Figure 2). Notable distinctions are the greater propensity of the **Me<sub>3</sub>P–Cu–*Ot*-Bu** species to dimerize (21.6 kcal/mol for dimer vs. 24.3 kcal/mol for monomer; Figure 3.1), likely reflecting the lower nucleophilicity of the d orbitals on Cu in **Me<sub>3</sub>P–Cu–*Ot*-Bu**<sup>40</sup>. Further, **Me<sub>3</sub>P–Cu–B(pin)** is 3.6 kcal/mol above **L3a–Cu–B(pin)**, whereas **Me<sub>2</sub>NHC–Cu–B(pin)** is more stable than the reference point with ligand **L3a** (−2.8 kcal/mol; Figure 2.1). The lower binding affinity of phosphine as opposed to NHC ligands likely renders reactions promoted by phosphines more prone to undesired reactivity resulting from ligand loss.

### Differences Between Density Functionals in Figures 2–3

Despite the similarity in trends between various density functionals there are notable distinctions. For example, **Me<sub>2</sub>NHC–Cu–B(pin)** is more stable than **L3a–Cu–B(pin)** only with functionals M06, MN12SX and M06L (−2.8, −3.6 and −1.1 kcal/mol, respectively; Figure 2.2). PBE0-D3BJ and particularly BP86-D3BJ, which tend to overestimate dispersion when the large bis-phosphine **L3a** is involved, predict **Me<sub>2</sub>NHC–Cu–B(pin)** to be 5.3 and 11.5 kcal/mol, respectively, less stable than **L3a–Cu–B(pin)** (Figure 2.2). Presumably, the energy for binding of the bis-phosphine ligand to Cu is overestimated. (Because spectroscopic experiments, as detailed in Section 14, indicate facile loss of the chiral ligand, the results with BP86-D3BJ are unlikely to be correct). Another instance where appropriate modeling of dispersion forces is central relates to the comparison of unimolecular (e.g., hydride Cu–H elimination) as opposed to bimolecular pathways (e.g., allylic substitution). For example, while there is a small energy gap between **ts<sub>BHE</sub>** and **ts<sub>AS</sub>** with functional M06 (5.1 vs. 1.7

kcal/mol; blue curve in Figure 2.1), with functional BP86-D3BJ  $ts_{AS}$  is favored significantly over  $ts_{BHE}$  (−3.3 vs. 12.8 kcal/mol; blue curve in Figure 2.2). Functional BP86-D3BJ probably provides an unsatisfactory representation of the mechanism, since the experimental results suggest competitiveness between Cu–H elimination and allylic substitution. The smallest energy gap between  $ts_{BHE}$  and  $ts_{AS}$  is predicted with functional MN12SX (4.3 vs. 3.5 kcal/mol; blue curve in Figure 2.2). Nearly identical trends to those described for L =  $NHCMe_2$  are observed with L =  $PMe_3$  as the model phosphine (Figure 3.2).

### Regarding Displacement of a Bis-phosphine from a Cu Complex by an Aryl Olefin or a Solvent Molecule (Figures 4–7)

Comparison of free energy surfaces for Cu–B(pin) addition with various supporting ligands (L) at the M06/Def2TZVPP<sub>thf(SMD)</sub>//ωB97XD/Def2SVP<sub>thf(SMD)</sub> level are shown in Figure 6.1. (For the individual free energy surfaces with L = styrene or thf, see Figures 4 and 5, respectively.) The graphs in Figure 6.1 offer insight regarding the ability of a select number of neutral ligands to stabilize intermediates and transition states along the catalytic cycle. For example, replacement of **L3a** from **L3a–Cu–B(pin)** (0.0 kcal/mol; grey curve in Figure 6.1) by  $NHCMe_2$  leads to an energy gain of 2.8 kcal/mol (red curve). Likewise, substitution of  $PMe_3$  affords a slightly less stable structure (3.6 kcal/mol; brown curve).

Styrene and thf are relatively inferior Cu ligands (13.6 and 16.0 kcal/mol; blue and light blue curves). The high energies for transition states  $ts_{CuBadd}$  and  $ts_{BHE}$  for L = thf (39.2 and 33.8 kcal/mol) rule out the feasibility of solvent-stabilized species as reactive intermediates. The situation is less straightforward with styrene. Changing the reference point from a common **L3a–Cu–B(pin)** intermediate to each individual **L–Cu–B(pin)** species (Figure 7) sheds some light on the impact of the electronic nature of L and the facility of each step. It appears that while  $\pi$ -donor ligands (thf) destabilize square planar transition states  $ts_{CuBadd}$  and  $ts_{BHE}$  (23.2 and 17.8 kcal/mol; light blue curve in Figure 7),  $\pi$ -acceptor ligands exert a more positive impact in this regard (e.g., styrene; 9.3 and 4.8 kcal/mol; blue curve in Figure 7). Competitive  $\pi$ -back-donation from Cu to the styrene molecules may facilitate movement of the B(pin) nucleophile across the lobes of the transition metal's  $d_{xy}$  orbital. In other words, Cu–styrene coordination through  $\sigma$ -donation becomes more important, rendering the  $\pi^*$ -orbital on styrene more electrophilic [more facile Cu–B(pin) addition]. These considerations suggest that, at sufficiently high styrene concentration, a Cu–B(pin) addition pathway that is bimolecular in styrene (cf. Scheme 15) might become competitive (23.0 and 16.9 kcal/mol for  $ts_{CuBadd}$  with L = styrene and L = **L3a**, respectively; Figures 6.1). Based on similar principles,  $\beta$ -H (or Cu–H) elimination might be favored with a  $\pi$ -accepting (electron-deficient) aryl olefin (4.8 and 17.8 kcal/mol for  $ts_{BHE}$  with L = styrene and L = thf; blue and light blue curves, Figure 7). It is therefore plausible that an aryl olefin might negatively impact enantioselectivity because competition between styrene and an allyl electrophile for **L3a–Cu–alkyl** could result in loss of the bis-phosphine ligand, followed by styrene-promoted Cu–H elimination via  $ts_{BHE}$  (L = styrene, 18.4 kcal/mol; blue curve, Figures 6.1); such a process is capable of being competitive with allylic substitution involving bis-phosphine–Cu–alkyl complex ( $ts_{AS}$  with L = **L3a** is 16.6 kcal/mol; grey curve, Figures 6.1). The findings illustrated in

Figure 7 further illustrate that allylic substitution processes involving **L3a-Cu-alkyl** might be particularly challenging due to steric hindrance. Whereas  $\text{ts}_{\text{CuBadd}}$  (15.4 kcal/mol) is significantly higher in energy compared to  $\text{ts}_{\text{AS}}$  (6.1 kcal/mol) with the smaller  $\text{PMe}_3$  ligand, the two transition states have nearly identical energies with ligand **L3a** (16.9 and 16.6 kcal/mol, respectively; Figure 7).

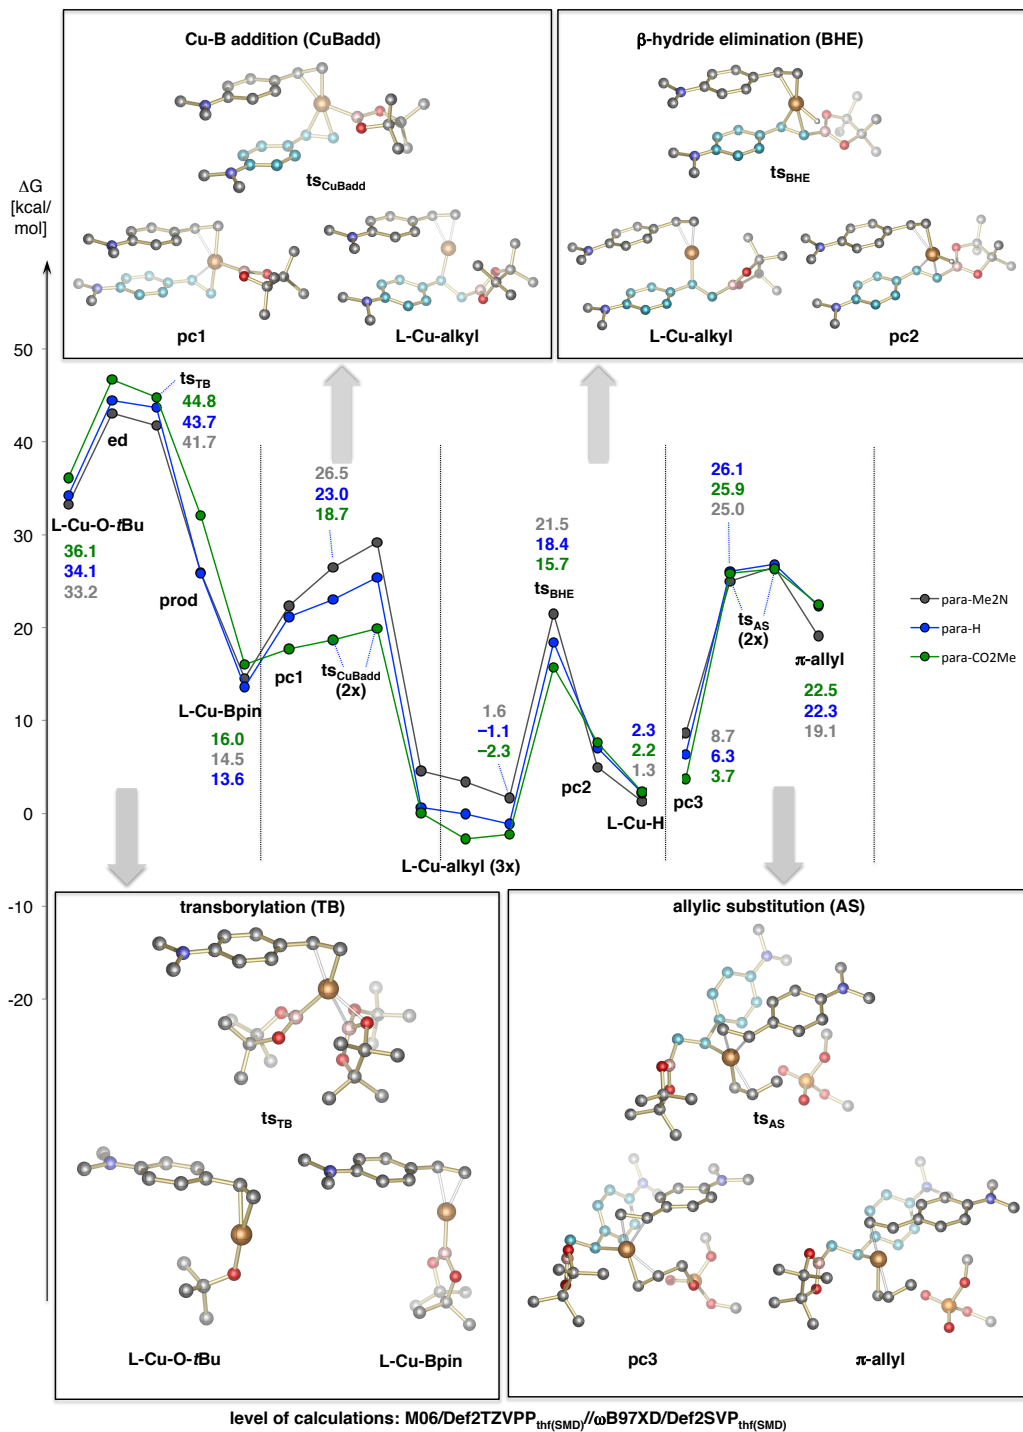

**Figure 4.1.** Free energy surfaces for the enantioselective Cu-B(pin) addition (CuBadd)/allylic substitution (AS) sequence with styrene derivatives as the supporting ligand (*p*-Me<sub>2</sub>N, grey; *p*-H (styrene), blue; *p*-CO<sub>2</sub>Me, green) at the M06/DefTZVPP<sub>thf(SMD)</sub>//ωB97XD/Def2SVP<sub>thf(SMD)</sub> level. Several conformers are shown for *ts*<sub>CuBadd</sub>, *ts*<sub>AS</sub> and L-Cu-alkyl. The free energies have been referenced to the most stable L3a-Cu-B(pin) conformer, which takes into account the free energy for ligand displacement (see Figure 6.1); the computed structures for L = *p*-Me<sub>2</sub>N-styrene are displayed. Abbreviations: TB, transborylation [conversion of Cu-alkoxide to Cu-B(pin)]; BHE, β-hydride (Cu-H) elimination; pc, π-complex.

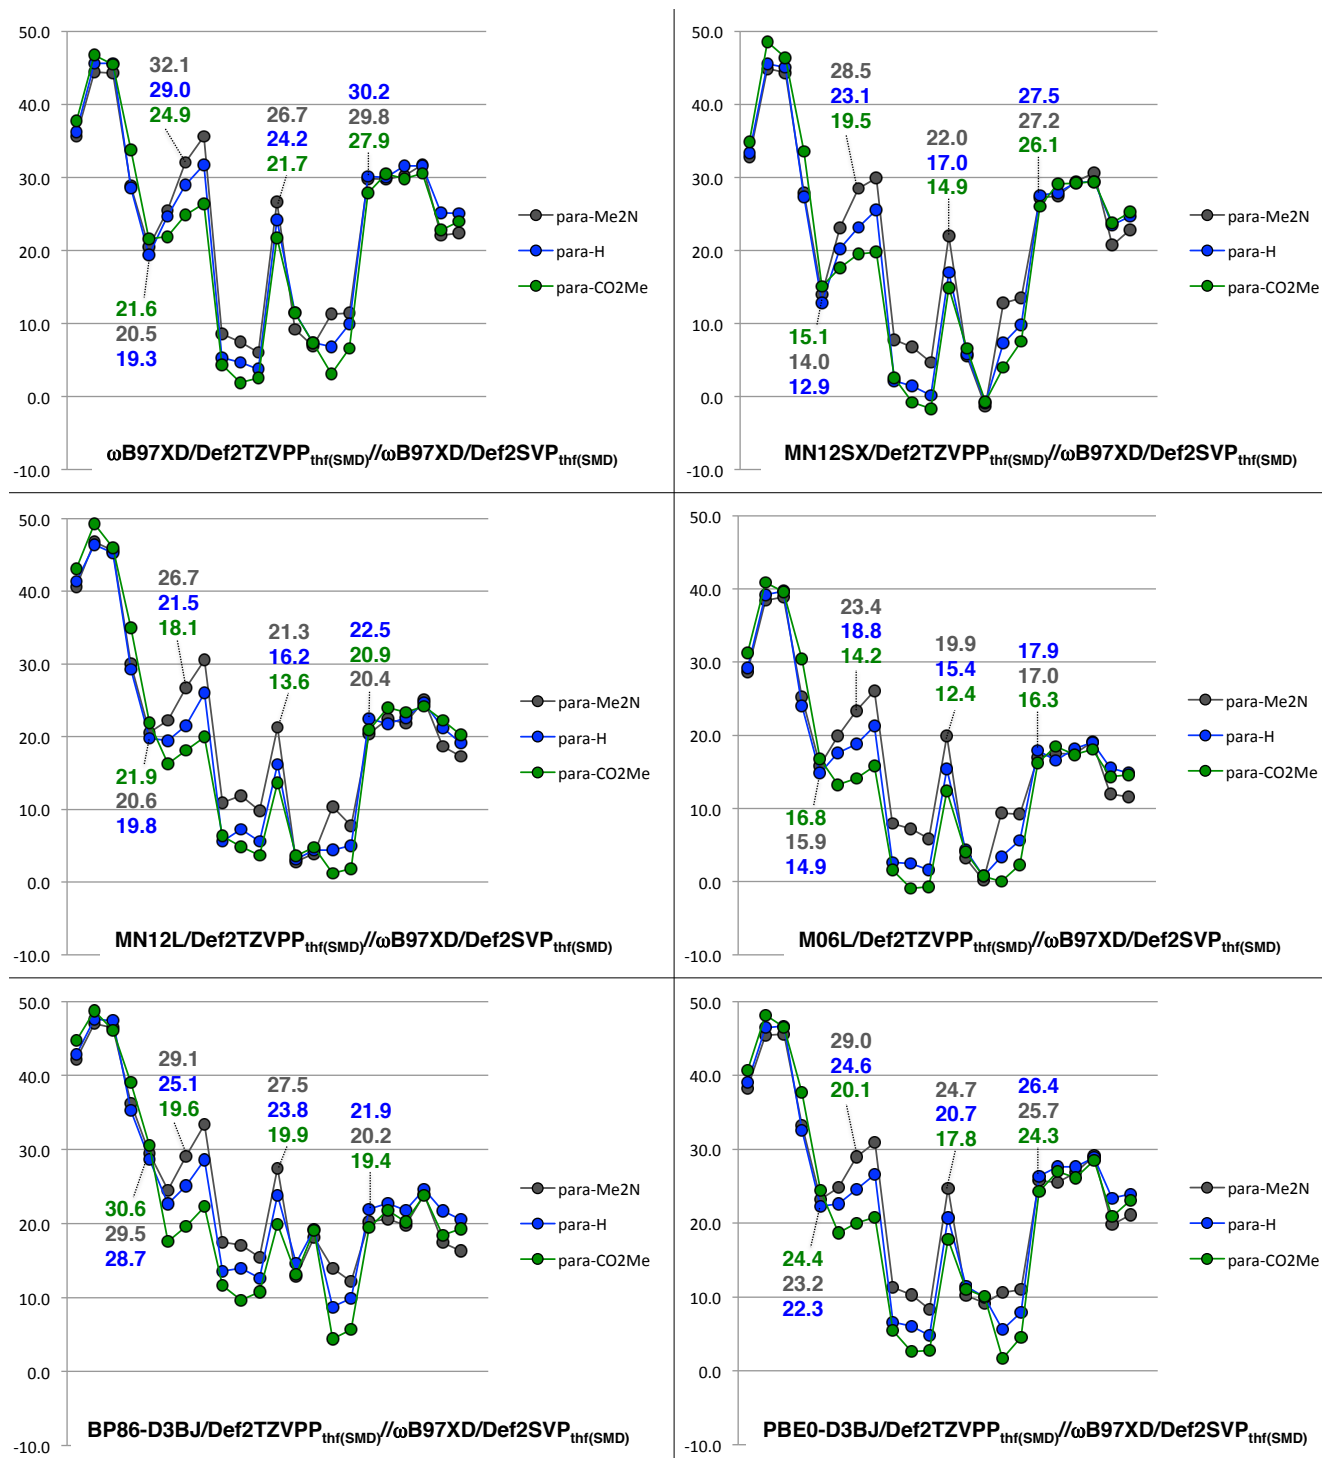

**Figure 4.2.** Free energy surfaces for the enantioselective Cu-B(pin) addition (CuBadd)/allylic substitution (AS) sequence with styrene derivatives as the supporting ligand (*p*-Me<sub>2</sub>N, grey; *p*-H (styrene), blue; *p*-CO<sub>2</sub>Me, green) with various density functionals after optimization with  $\omega$ B97XD/Def2SVP<sub>thf(SMD)</sub>. For more details, see Figure 4.1.

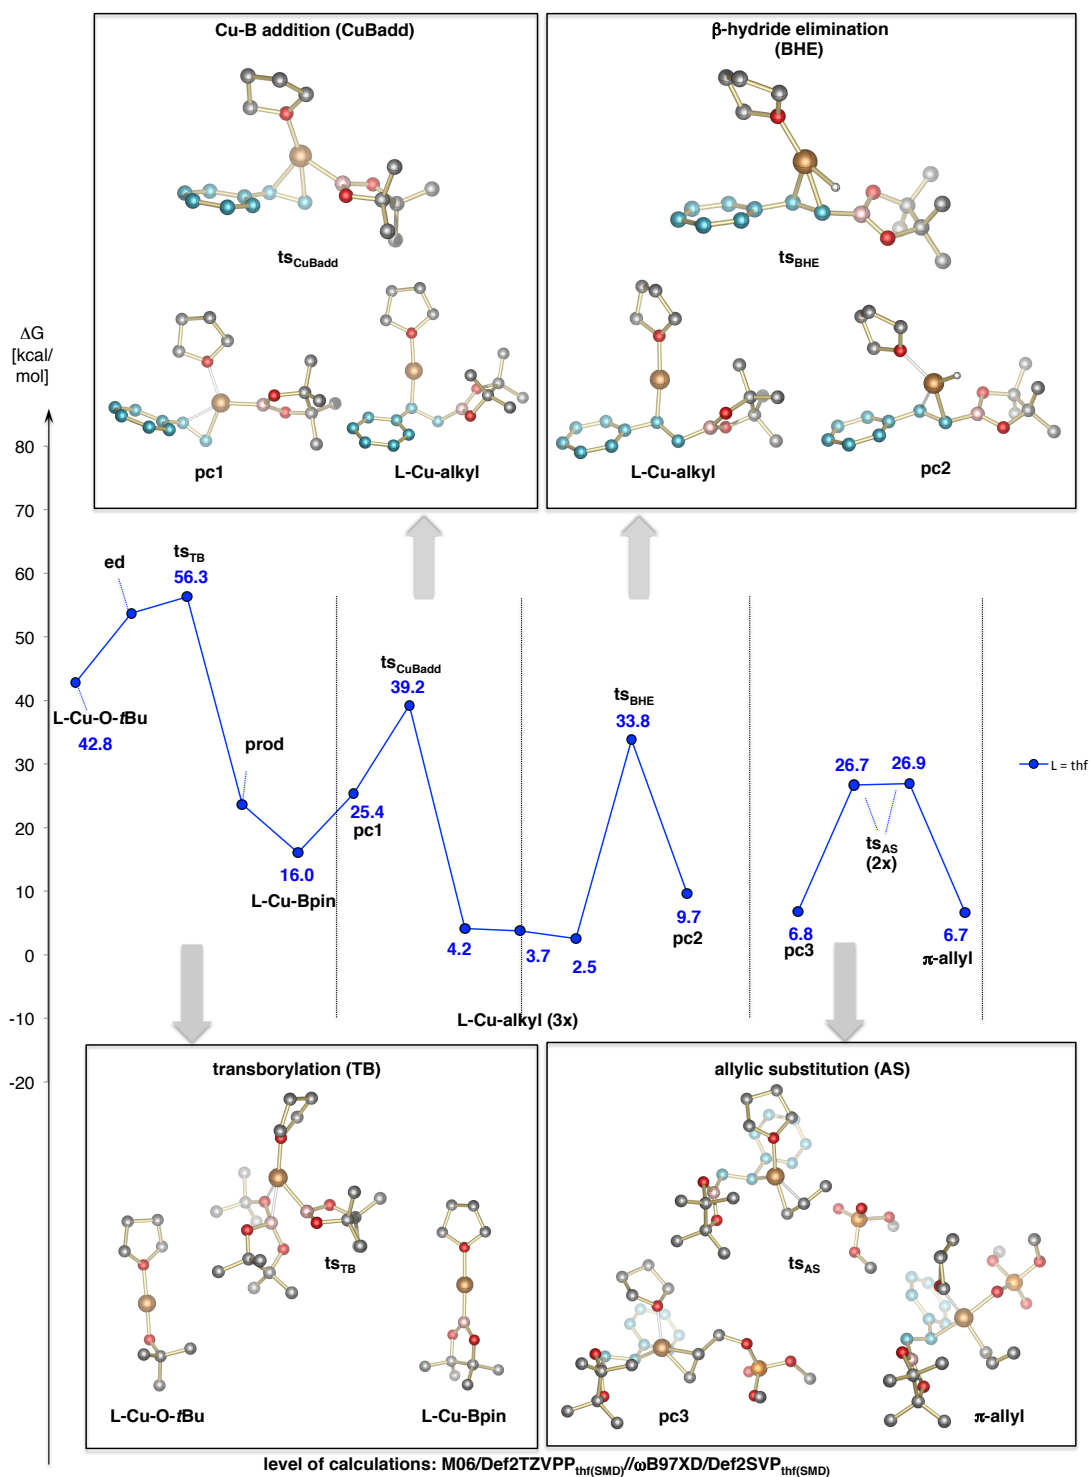

**Figure 5.1.** Free energy surfaces for the enantioselective Cu-B(pin) addition (CuBadd)/allylic substitution (AS) sequence with a thf molecule as the supporting ligand at the M06/DefTZVPP<sub>thf(SMD)</sub>// $\omega$ B97XD/Def2SVP<sub>thf(SMD)</sub> level. Several conformers are shown for **ts<sub>AS</sub>** and **L-Cu-alkyl**. The free energies have been referenced to the most stable **L3a-Cu-Bpin** conformer, which takes into account the free energy for ligand displacement (cf. Figure 6.1). Abbreviations: **TB**, transborylation [conversion of Cu-alkoxide to Cu-B(pin)]; **BHE**,  $\beta$ -hydride (Cu-H) elimination; **pc**,  $\pi$ -complex.

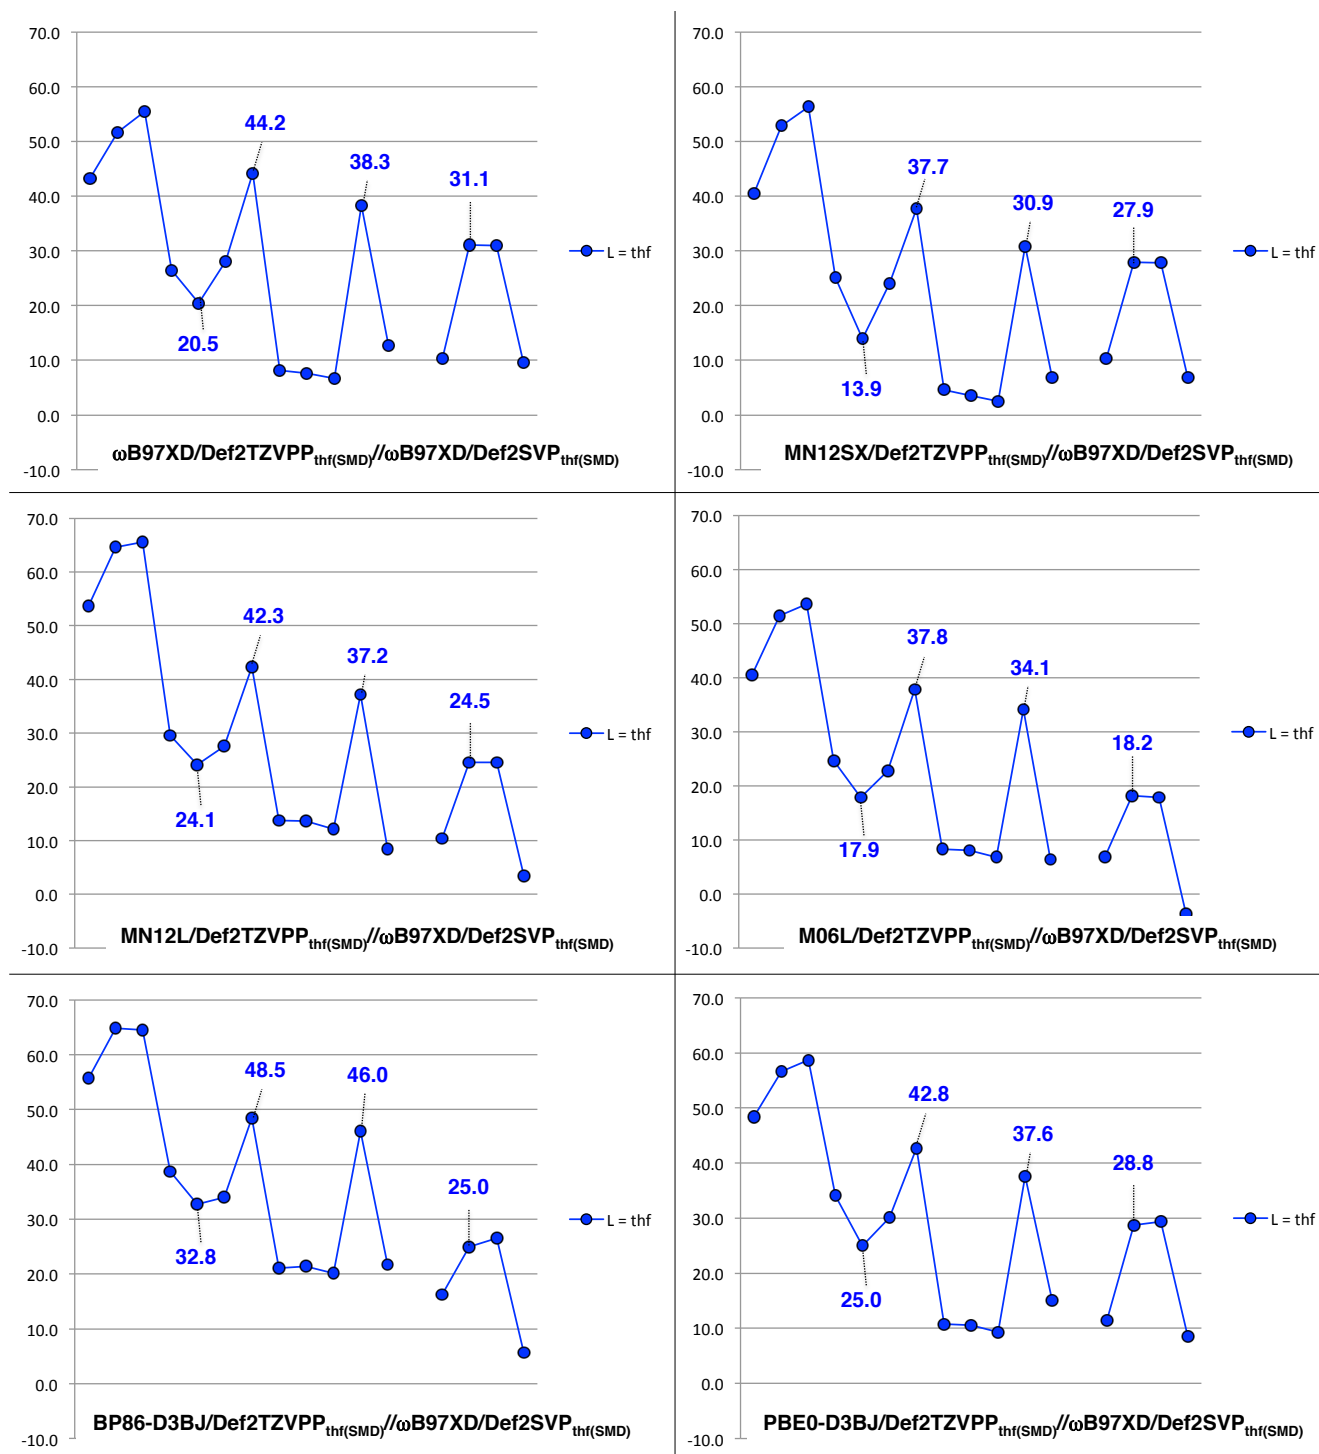

**Figure 5.2.** Free energy surfaces for the enantioselective Cu-B(pin) addition (CuBadd)/allylic substitution (AS) sequence with a thf molecule as the supporting ligand with different density functionals after optimization with  $\omega$ B97XD/Def2SVP<sub>THF(SMD)}</sub>. For details, see Figure 5.1.



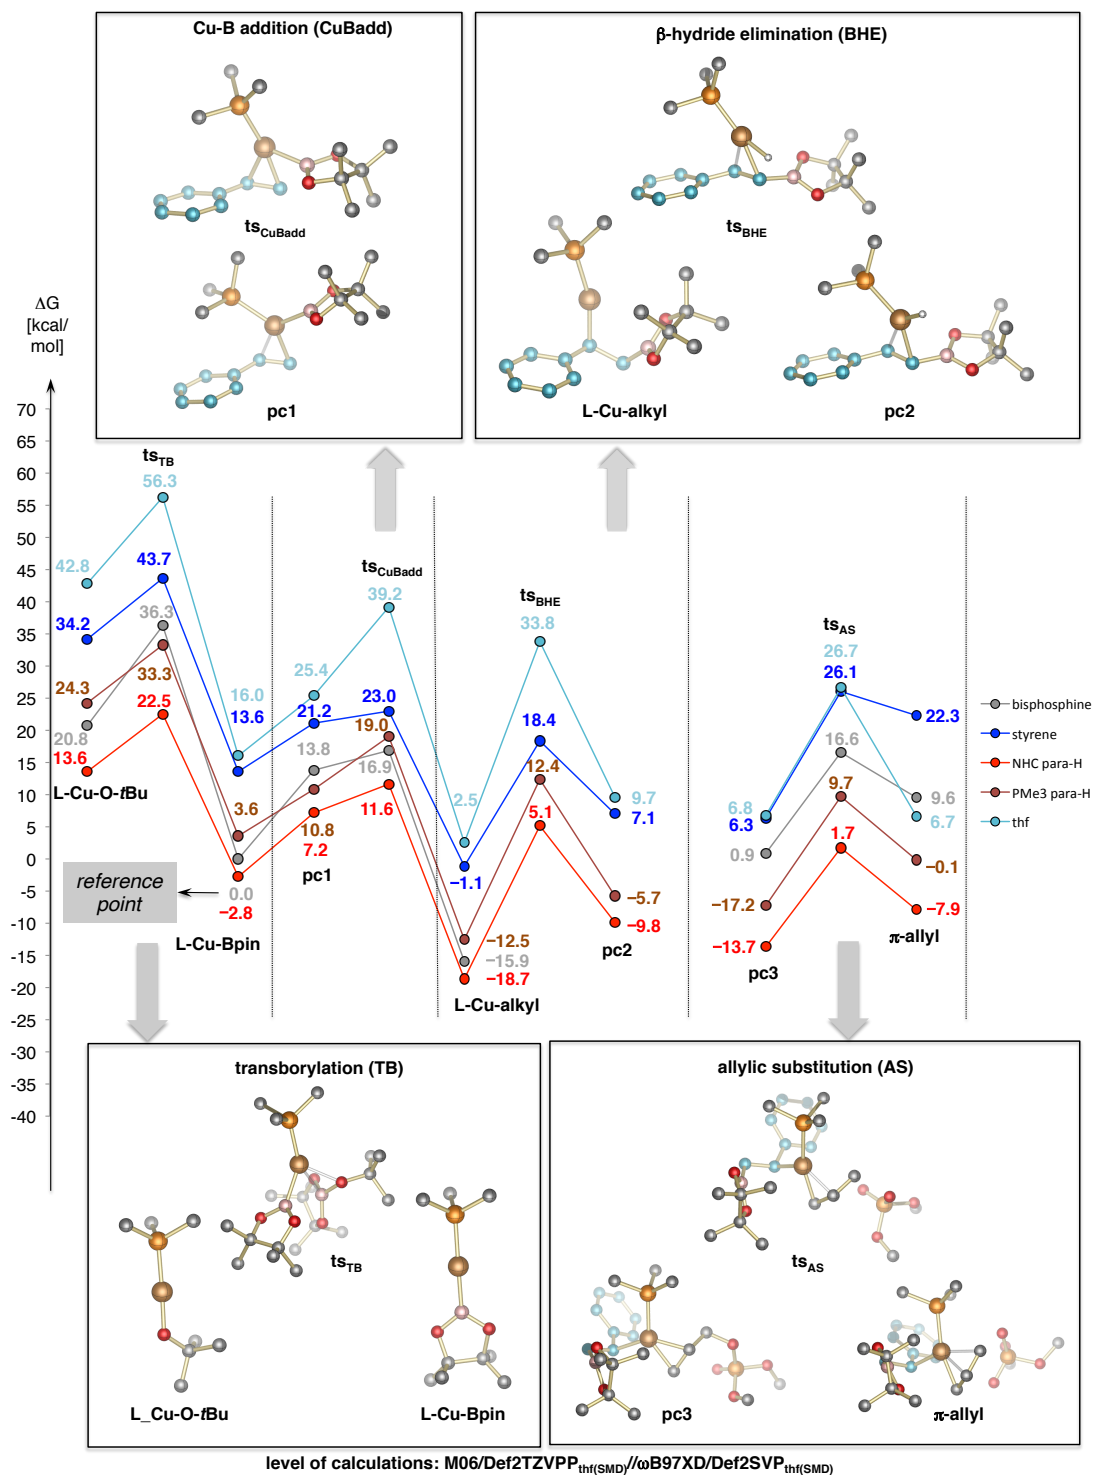

**Figure 6.1.** Free energy surfaces for the enantioselective Cu-B(pin) addition (CuBadd)/allylic substitution (AS) sequence in presence of various ligands L (L3a, grey; styrene, blue; model NHC ligand NHCMe<sub>2</sub>, red; model phosphine ligand PMe<sub>3</sub>, brown; thf, light blue) at the M06/DefTZVPP<sub>thf(SMD)</sub>/ωB97XD/Def2SVP<sub>thf(SMD)</sub> level. All free energies have been referenced to the L3a-Cu-B(pin) species, which takes into account the free energy of ligand exchange; only computed structures for L = PMe<sub>3</sub> are shown. Abbreviations: TB, transborylation [conversion of Cu-alkoxide to Cu-B(pin)]; BHE, β-hydride (Cu-H) elimination; pc, π-complex.

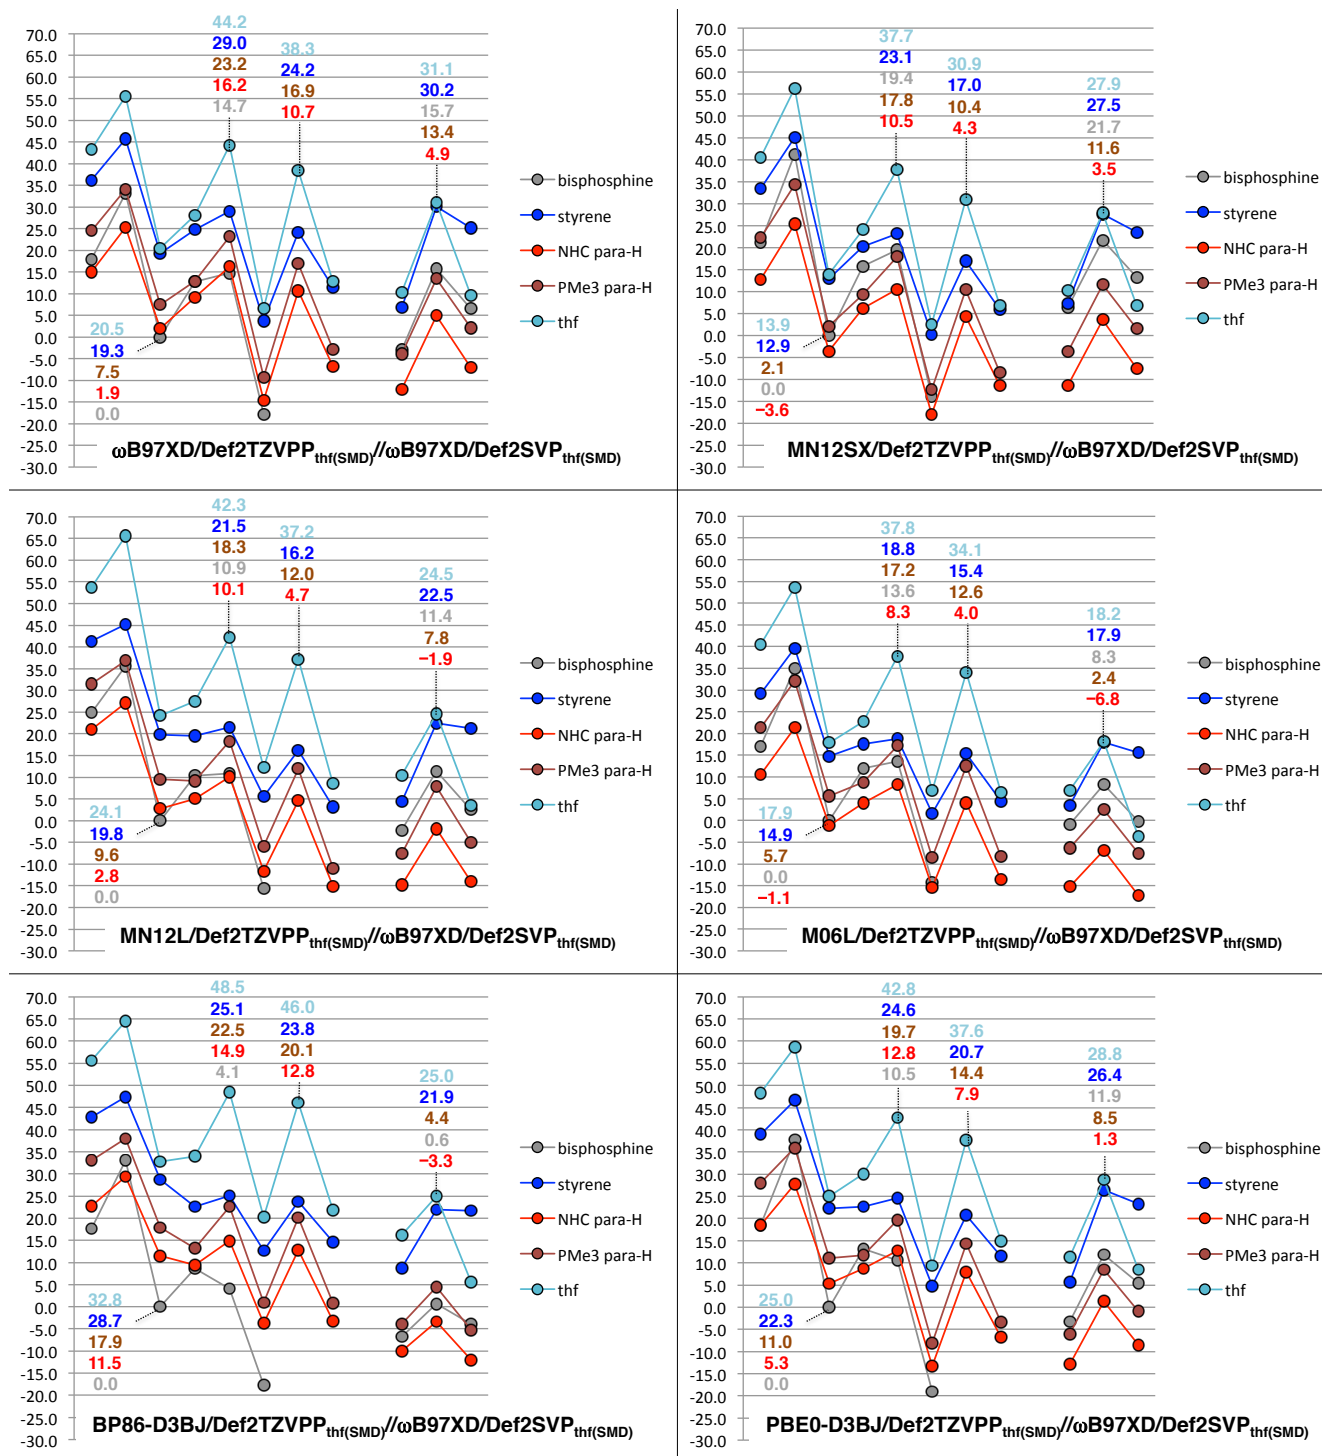

**Figure 6.2.** Free energy surfaces for the enantioselective Cu-B(pin) addition (CuBadd)/allylic substitution (AS) sequence in presence of various ligands L (L3a, grey; styrene, blue; model NHC ligand NHCMe<sub>2</sub>, red; model phosphine ligand PMe<sub>3</sub>, brown; thf, light blue) with various density functionals after optimization with  $\omega\text{B97XD/Def2SVP}_{\text{thf(SMD)}}$ . For more details, see Figure 6.1.

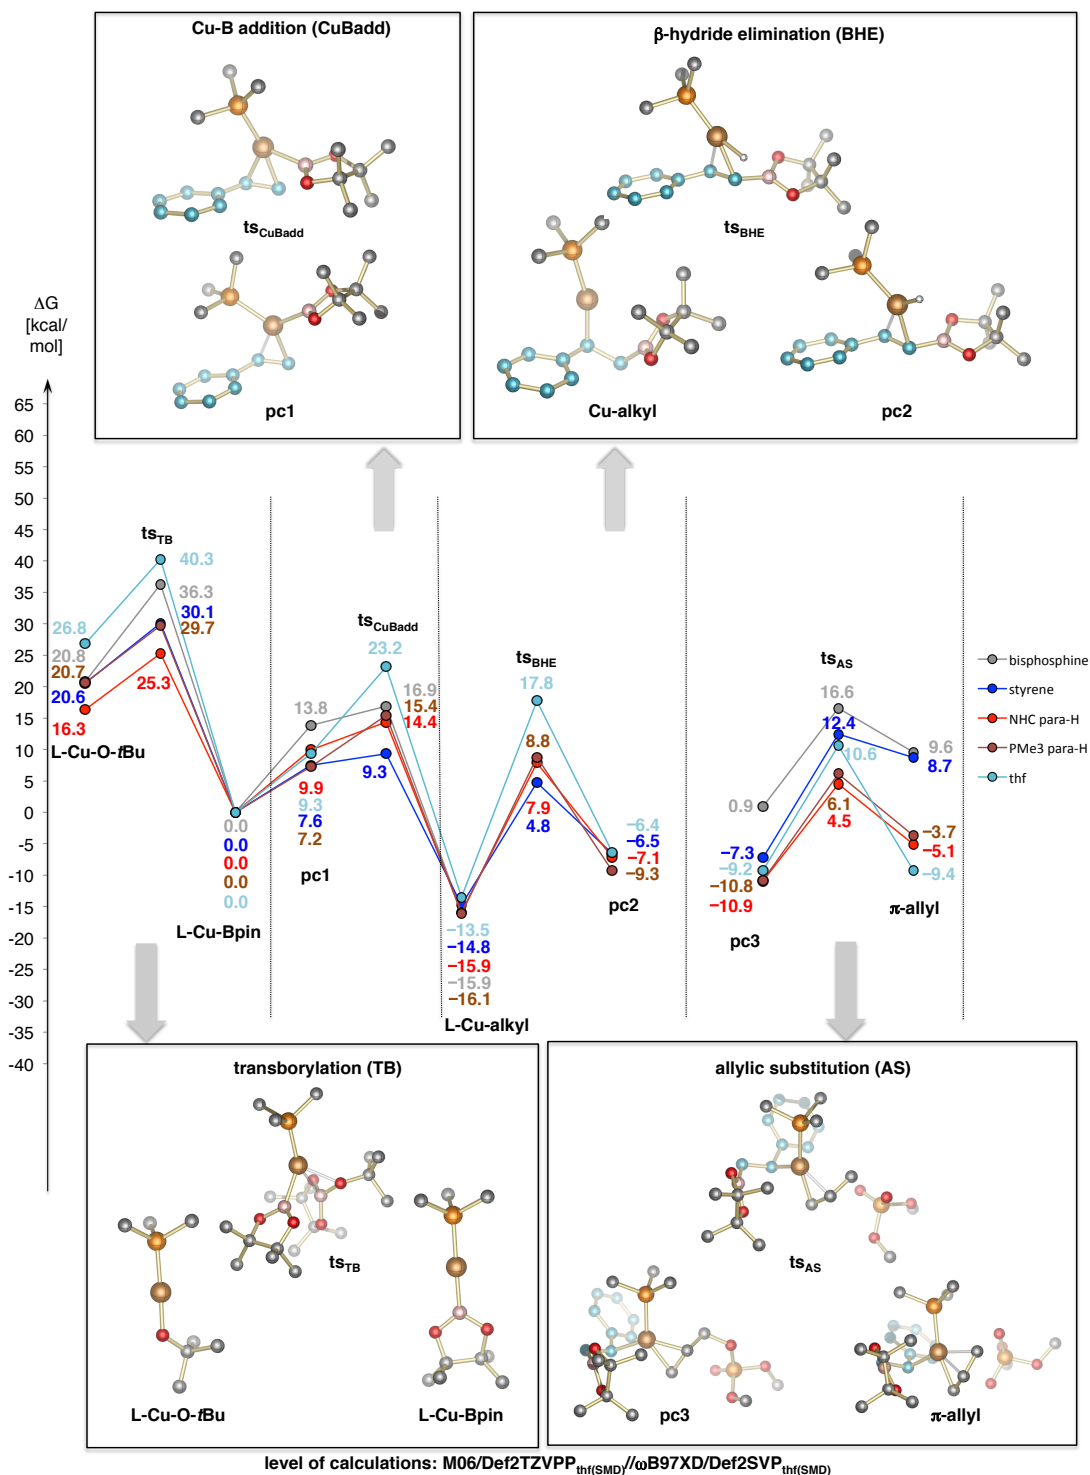

**Figure 7.** Free energy surfaces for the enantioselective Cu–Bpin addition (CuBadd)/allylic substitution (AS) sequence in presence of various ligands **L** (**L3a**, grey; **styrene**, blue; model NHC ligand **NHCMe<sub>2</sub>**, red; model phosphine ligand **PMe<sub>3</sub>**, brown; **thf**, light blue) at the M06/DefTZVPP<sub>thf(SMD)</sub>//ωB97XD/Def2SVP<sub>thf(SMD)</sub> level. The free energies for a given ligand **L** have been referenced to the L–Cu–B(pin) species, which does not take into account the free energy of ligand exchange; only computed structures for **L** = **PMe<sub>3</sub>** are shown. Abbreviations: **TB**, transborylation [conversion of Cu–alkoxide to Cu–B(pin)]; **BHE**, β-hydride (Cu–H) elimination; **pc**, π-complex.

## Differences Between Density Functionals and the Negative Impact that an Aryl Olefins Might Have on Enantioselectivity (Figure 6.2)

There are noteworthy differences between various density functionals regarding the probability of competitive pathways, which would entail loss of bis-phosphine **L3a** and a pathway that is second-order in aryl olefin (see Scheme 15). For instance  $ts_{CuBadd}$  with L = **L3a** is less than 7 kcal/mol more stable than  $ts_{CuBadd}$  with L = styrene with M06 (6.1 kcal/mol; Figure 6.1), MN12SX (3.7 kcal/mol; Figure 6.2) and M06L (5.2 kcal/mol; Figure 6.2). (It should be noted that there is significant excess of styrene compared to bis-phosphine **L3a**.) With other density functionals a non-selective Cu–B(pin) addition mechanism that is second-order in styrene seems less likely. Similarly, styrene-induced  $\beta$ -hydride (Cu–H) elimination through the sequence entailing replacement of bis-phosphine **L3a**, followed by  $ts_{BHE}$  with L = styrene, could be responsible for lowering of enantioselectivity if predictions made with functionals M06 and particularly MN12SX were correct. That is, with MN12SX allylic substitution involving **L3a**–Cu–alkyl (21.7 kcal/mol; grey curve, Figure 6.2) is energetically more demanding than  $ts_{BHE}$  with L = styrene (17.0 kcal/mol; blue curve, Figure 6.2). In contrast, if the results with BP86-D3BJ, a functional, which tends to overestimate dispersion forces involving the bulky bisphosphine ligand, were correct (which is unlikely), a mechanism entailing styrene-promoted loss of ligand **L3a** could be entirely ruled out (i.e., the grey curve for L = **L3a** is significantly below the blue curve for L = styrene, Figure 6.2).

## Coordinating Affinity of Aryl Olefins to Cu*Ot*-Bu, Cu*Ot*-Bu dimer, Cu(*Ot*-Bu)<sub>2</sub><sup>−</sup> and Cu(*Ot*-Bu)<sub>2</sub><sup>−</sup>Na<sup>+</sup> (cf. Figures 8–9)

To examine the relationship between the electronic attributes of an aryl olefin and its ability to coordinate with various (Cu*Ot*-Bu)<sub>n</sub> entities, we carried out the calculations illustrated in Figures 8–9 (M06/Def2TZVPP<sub>thf(SMD)</sub>// ωB97XD/Def2SVP<sub>thf(SMD)</sub>). These data show that replacement of bis-phosphine **L3a** from Cu*Ot*-Bu by styrene is significantly endergonic (13.4 kcal/mol, Figures 8.1) and that electron-rich aryl olefins stabilize linear alkene···Cu–*Ot*-Bu structures more effectively (12.4 vs. 15.3 kcal/mol for *p*-dimethylaminostyrene vs. *p*-methylesterstyrene, respectively; Figure 8.1). The trend is reversed for the dimeric systems, where it appears that  $\pi$ -backbonding to the olefin becomes more of a factor (9.8, 9.6 and 8.8 kcal/mol for *p*-dimethylaminostyrene, styrene and *p*-methylesterstyrene, respectively; Figure 8.1). However, such ground states effects are unlikely to have a major impact on e.r. fluctuations because of the relatively small energy difference resulting from electronic attributes of an aryl olefin together with the relatively low binding affinity of olefins to Cu*Ot*-Bu species<sup>47</sup> compared to a bis-phosphine.

Similar trends regarding the electronic nature of aryl olefins are observed vis-à-vis binding Cu–(*Ot*-Bu)<sub>2</sub><sup>−</sup> and Cu–(*Ot*-Bu)<sub>2</sub><sup>−</sup>Na<sup>+</sup> (Figure 9.1). Association of *p*-methylesterstyrene is favored by 3.8

---

(47) For a review on the chemistry of olefin–Cu(I) complexes, see: (a) Wang, X.-S., Zhao, H., Li, Y.-H., Xiong, R.-G. & You X.-Z. *Topics in Catalysis* **35**, 43–61 (2005). For the intramolecular chelation of olefins to Cu–*Ot*Bu clusters, see: (b) Hakansson, M., Lopes, C. & Jagner, S. *Organometallics* **17**, 210–215 (1998). (c) Bellot, B. J. & Girolami, G. S. *Organometallics* **28**, 2046–2052 (2009).  $\pi$ -Backbonding is typically more pronounced in complexes with more nucleophilic anionic dinitrogen-containing ligands: (d) Oguadinma, P. O. & Schaper, F. *Organometallics* **28**, 6721–6731 (2009).

kcal/mol relative to *p*-NMe<sub>2</sub>-styrene, although binding is overall highly endergonic (16.7 kcal/mol for *p*-CO<sub>2</sub>Me-styrene; Figure 9.1); this might be attributed to the increase in repulsion between the alkoxide oxygen non-bonding electrons when they reside in a *cis* relationship<sup>48</sup>. In contrast, binding to the Cu(*O**t*-Bu)<sub>2</sub><sup>-</sup>Na<sup>+</sup> species is only slightly exergonic, with a slight preference for electron-deficient aryl olefins (0.5 and 1.1 kcal/mol relative stabilization for *p*-methylesterstyrene compared to *p*-NMe<sub>2</sub>-styrene on the Δ*G* and Δ*E* surfaces, respectively; Figure 9.1). Here, repulsion caused by the alkoxide oxygen non-bonding electrons is countered by a Na ion<sup>48</sup>, which can favor alkene–Cu association (*G*<sub>rel</sub> = –0.7 kcal/mol for *p*-methylesterstyrene; Figure 9.1).

### Factors that Impact S<sub>N</sub>2' Selectivity (Figure 10)

The free energy transition states for the allylic substitution (AS) step was carried out with a system that contains a model phosphine (PMe<sub>3</sub>) and NHC (NHCMe<sub>2</sub>) ligand at the M06/Def2TZVPP<sub>thf(SMD)</sub>//ωB97XD/Def2SVP<sub>thf(SMD)</sub> level (Figure 10.1). With L = PMe<sub>3</sub> reaction of the linear nucleophilic L–Cu–Me species<sup>40b</sup> with allylphosphate in a S<sub>N</sub>2'-type fashion (24.7 kcal/mol) is predicted to be 1.4 kcal/mol lower in free energy (compared to the S<sub>N</sub>2-type transition state, 26.1 kcal/mol). A similar trend is observed with L = NHCMe<sub>2</sub> (24.7 vs. 27.2 kcal/mol). Furthermore, it appears that the presence of an NHC ligand does not mean faster allylic substitution (compared to a phosphine); this can be attributed to the relatively high energy required to distort the L–Cu–Me species from its linear geometry into a bent form (18.0 kcal/mol required to reach a 115 ° angle vs. 14.5 kcal/mol for the corresponding PMe<sub>3</sub> species; Figure 10.1). It is likely that a potential positive influence of an NHC ligand may be attributed to diminished tendency for aggregate formation (as discussed above). As shown by Nakamura in connection to anionic cuprate complexes<sup>40,41a</sup>, such “hetero-cuprate” Cu(I)–alkyl species in their bent form (Scheme 17a; stronger Me compared to weaker NHC/phosphine donor) display an increased orbital coefficient on the d<sub>xy</sub> orbital lobe that is *cis* to the more nucleophilic alkyl group (HOMO at an angle of 115°; Scheme 17b); this favors addition of the allyl electrophile so that the larger coefficient on C3 is *trans* to less nucleophilic/neutral NHC/phosphine ligand (Scheme 17c). In addition to these electronic effects, the involvement of a chelate interaction between a phosphate/carboxylate leaving group with either a cyanide ligand (as proposed by Nakamura)<sup>41a</sup> or a pendant sulfonate group<sup>42</sup> is probably not a necessary prerequisite for obtaining high S<sub>N</sub>2'-selectivity, but it can assist in difficult cases such as those where a bulky allyl electrophile is involved. In other words, reactions promoted by alkyl–Cu–PR<sub>3</sub> species and a small/unsubstituted allyl electrophile are highly S<sub>N</sub>2' selective (cf. Figure 4d in the manuscript). Our studies further show that allylic substitution transition state **ts<sub>AS</sub>(S<sub>N</sub>2')** is relatively early in character (i.e., it resembles the square-planar olefin π-complex generated from complexation to the C2=C3 double bond) with a relatively short Cu–C3 bond length of 1.978 Å and a comparatively extended Cu–C1 bond (2.468 Å). On the other hand, **ts<sub>AS</sub>(S<sub>N</sub>2)** is more “product-like” (that is, it more resembles the high-energy, square-planar π-allyl species), as indicated by the smaller difference between the Cu–C1

(48) A similar phenomenon has been described during polytopal rearrangements and olefin metathesis reactions of Ru carbene complexes. See: (a) Torker, S., Khan, R. K. M. & Hoveyda, A. H. *J. Am. Chem. Soc.* **136**, 3439–3455 (2014). (b) Khan, R. K. M., Torker, S. & Hoveyda, A. H. *J. Am. Chem. Soc.* **135**, 10258–10261 (2013).

and Cu–C3 bond lengths (2.330 and 2.063 Å, respectively), which is in agreement with an earlier report<sup>41a</sup>.

**Scheme 17.** S<sub>N</sub>2' selectivity in allylic substitution (AS) promoted by "heterocuprate-like" Me<sub>2</sub>NHC–Cu–Me; (a) HOMO of linear ground state; (b) HOMO of bent ground state (Me–Cu–C<sup>NHC</sup> = 115 °); (c) transition state for S<sub>N</sub>2'-type mode of addition; (d) transition state for S<sub>N</sub>2-type mode of addition.

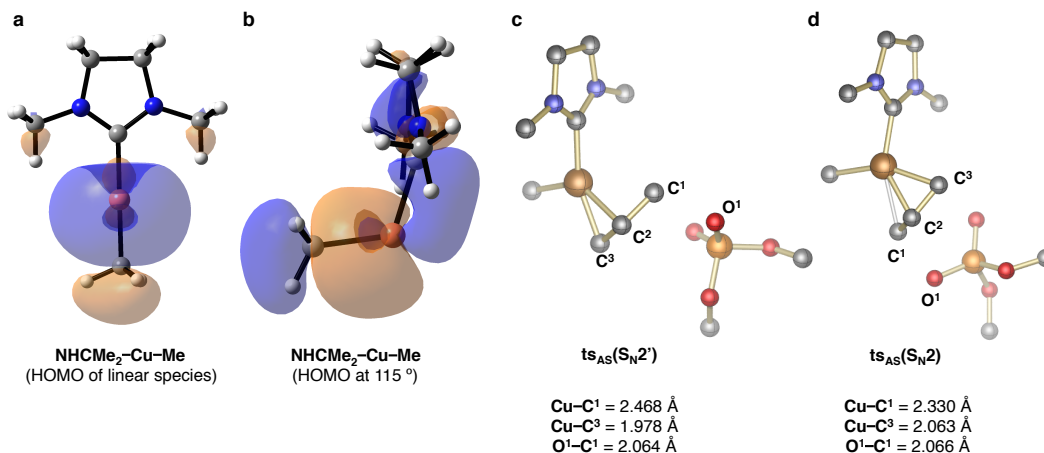

A similar trend, as described for Cu species bearing neutral NHC or phosphine ligands, is observed for the reaction catalyzed by **L–Cu–Me** (L = Na–OtBu). The energies for **ts<sub>AS</sub>(S<sub>N</sub>2')** and **ts<sub>AS</sub>(S<sub>N</sub>2)** are 24.6 and 26.4 kcal/mol, respectively (left graph, Figure 10.1). (It should be noted that there is no intermolecular coordination between the phosphate leaving group and the Na counterion). In the alternative cases with intramolecular coordination of the phosphate leaving group to the Na cation bound to the alkoxide there is significant stabilization of both types of transition states (18.4 and 14.8 kcal/mol, respectively for **ts<sub>AS</sub>(S<sub>N</sub>2')**<sub>chelate</sub> and **ts<sub>AS</sub>(S<sub>N</sub>2)**<sub>chelate</sub>; cf. Figure 10.1), although this lowering in energy is likely overestimated and subject to significant uncertainties due to the presumably more complex coordination environment in solution (i.e., larger chelate structures with additional molecules of base, etc). Nonetheless, trends in energies and structural features might provide a hint for why background reactions [i.e., those catalyzed by **L–Cu–Me** (L = NaOt-Bu)] are less regioselective (Scheme 18). In case of the S<sub>N</sub>2'-type transition state with a chelating interaction, the Na–O<sup>1</sup> and Na–O<sup>2</sup> bond lengths are 2.194 and 2.196 Å, respectively. This is significantly longer than when the Cu center displaces the phosphate with its d<sub>2</sub> orbital through an S<sub>N</sub>2-type mechanism (2.161 and 2.147 Å for Na–O<sup>1</sup> and Na–O<sup>2</sup>, respectively; Scheme 18). These findings imply that **ts<sub>AS</sub>(S<sub>N</sub>2')**<sub>chelate</sub> might be more strained, which is reflected in the larger entropy corrections to the free energy (ΔG<sub>corr</sub> = 15.0 vs. 10.8 kcal/mol for **ts<sub>AS</sub>(S<sub>N</sub>2')**<sub>chelate</sub> vs. **ts<sub>AS</sub>(S<sub>N</sub>2)**<sub>chelate</sub>, respectively; Section 19).

**Scheme 18.** Geometries of transition states for allylic substitution (AS) for background reaction with a chelate bridge between *tert*-butoxide and phosphate through a Na counterion.

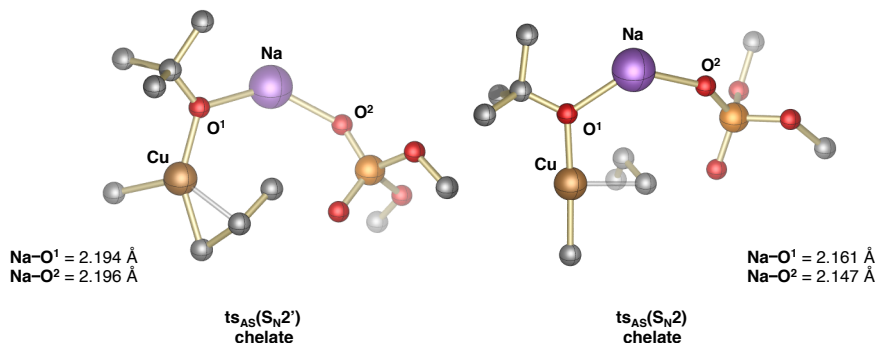

Intramolecular coordination of the phosphate leaving group to the Na cation bound to the alkoxide leads to significant stabilization of both types of transition states (18.4 and 14.8 kcal/mol, respectively for  $ts_{AS}(S_N2')$ <sub>chelate</sub> and  $ts_{AS}(S_N2)$ <sub>chelate</sub>; cf. Figure 10.1), although this lowering in energy is likely overestimated and subject to significant uncertainties due to the presumably more complex coordination environment in solution (i.e., larger chelate structures with additional molecules of base, etc). Nonetheless, trends in energies and structural features might provide a hint for why background reactions are less regioselective (Scheme 18). In case of the  $S_N2'$ -type transition state with a chelating interaction, the Na-O<sup>1</sup> and Na-O<sup>2</sup> bond lengths are 2.194 and 2.196 Å, respectively. This is significantly longer than when the Cu center displaces the phosphate with its  $d_{z^2}$  orbital through an  $S_N2$ -type mechanism (2.161 and 2.147 Å for Na-O<sup>1</sup> and Na-O<sup>2</sup>, respectively; Scheme 18). These findings imply that  $ts_{AS}(S_N2')$ <sub>chelate</sub> might be more strained, which is reflected in the larger entropy corrections to the free energy ( $\Delta G_{corr} = 15.0$  vs. 10.8 kcal/mol for  $ts_{AS}(S_N2')$ <sub>chelate</sub> vs.  $ts_{AS}(S_N2)$ <sub>chelate</sub>, respectively; Section 19).

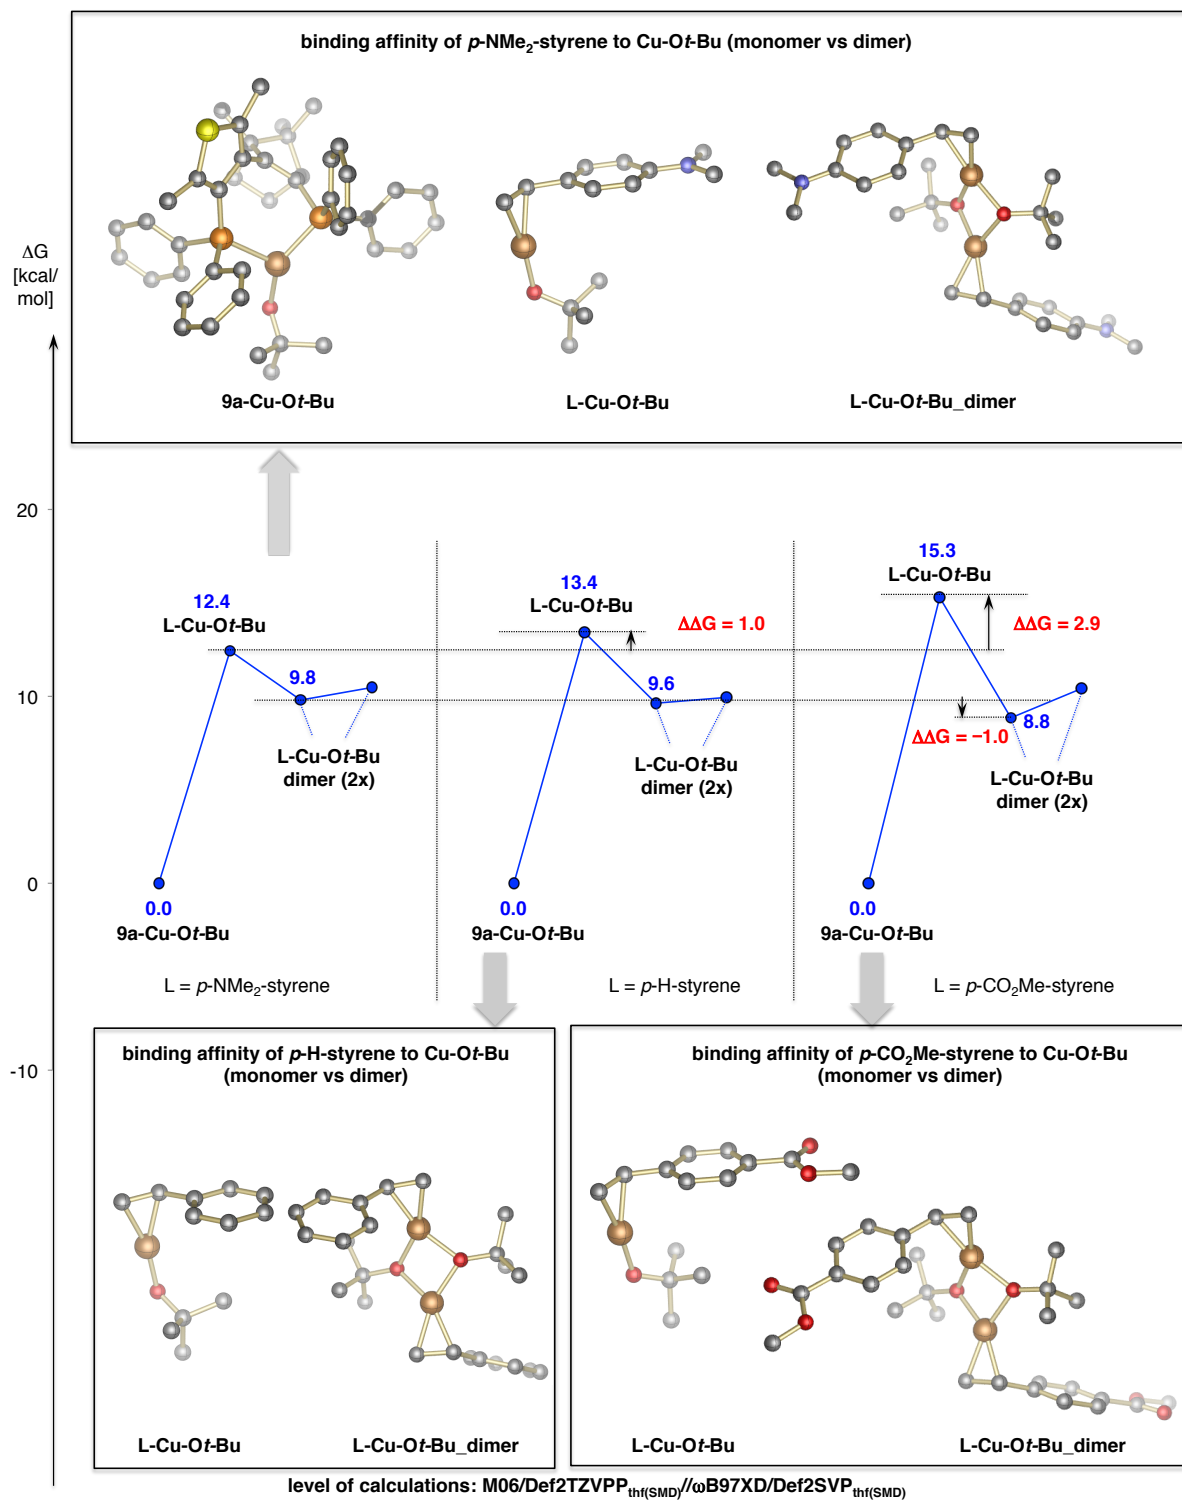

**Figure 8.1.** Free energy surfaces for binding affinity of various styrene derivatives (*p*-Me<sub>2</sub>N, left; *p*-H (styrene), center; *p*-CO<sub>2</sub>Me, right) to the CuO $\dagger$ -Bu monomer or dimer (CuO $\dagger$ -Bu-dimer) at the M06/DefTZVPP<sub>thf(SMD)</sub>// $\omega$ B97XD/Def2SVP<sub>thf(SMD)</sub> level. Several conformers are shown for L-CuO $\dagger$ -Bu-dimer; the free energies have been referenced to 3La-Cu-O $\dagger$ -Bu, which takes into account the free energy for ligand displacement (cf. Figure 6.1).



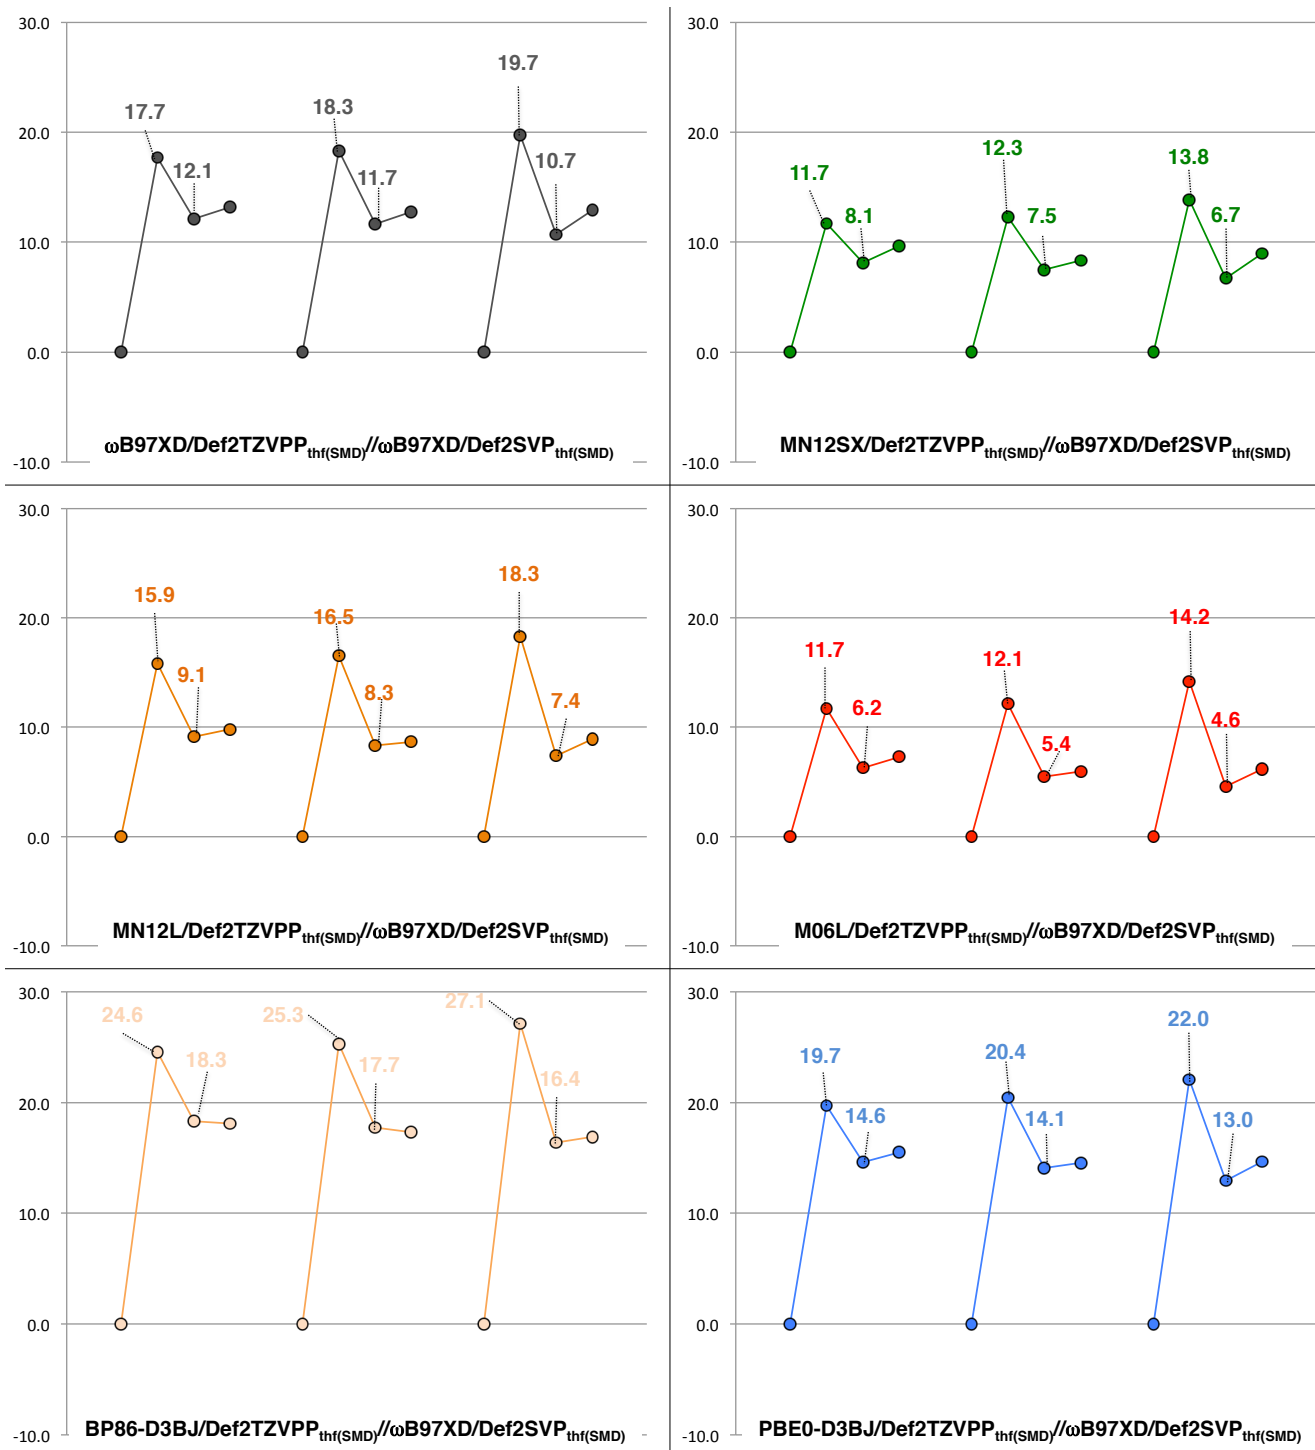

**Figure 8.2.** Free energy surfaces for binding affinity of various styrene derivatives (*p*-Me<sub>2</sub>N, left; *p*-H (styrene), center; *p*-CO<sub>2</sub>Me, right) to the CuOt-Bu monomer or dimer (CuOt-Bu-dimer) with various density functionals after optimization with ωB97XD/Def2SVP<sub>thf(SMD)</sub>. For details, see Figure 8.1.

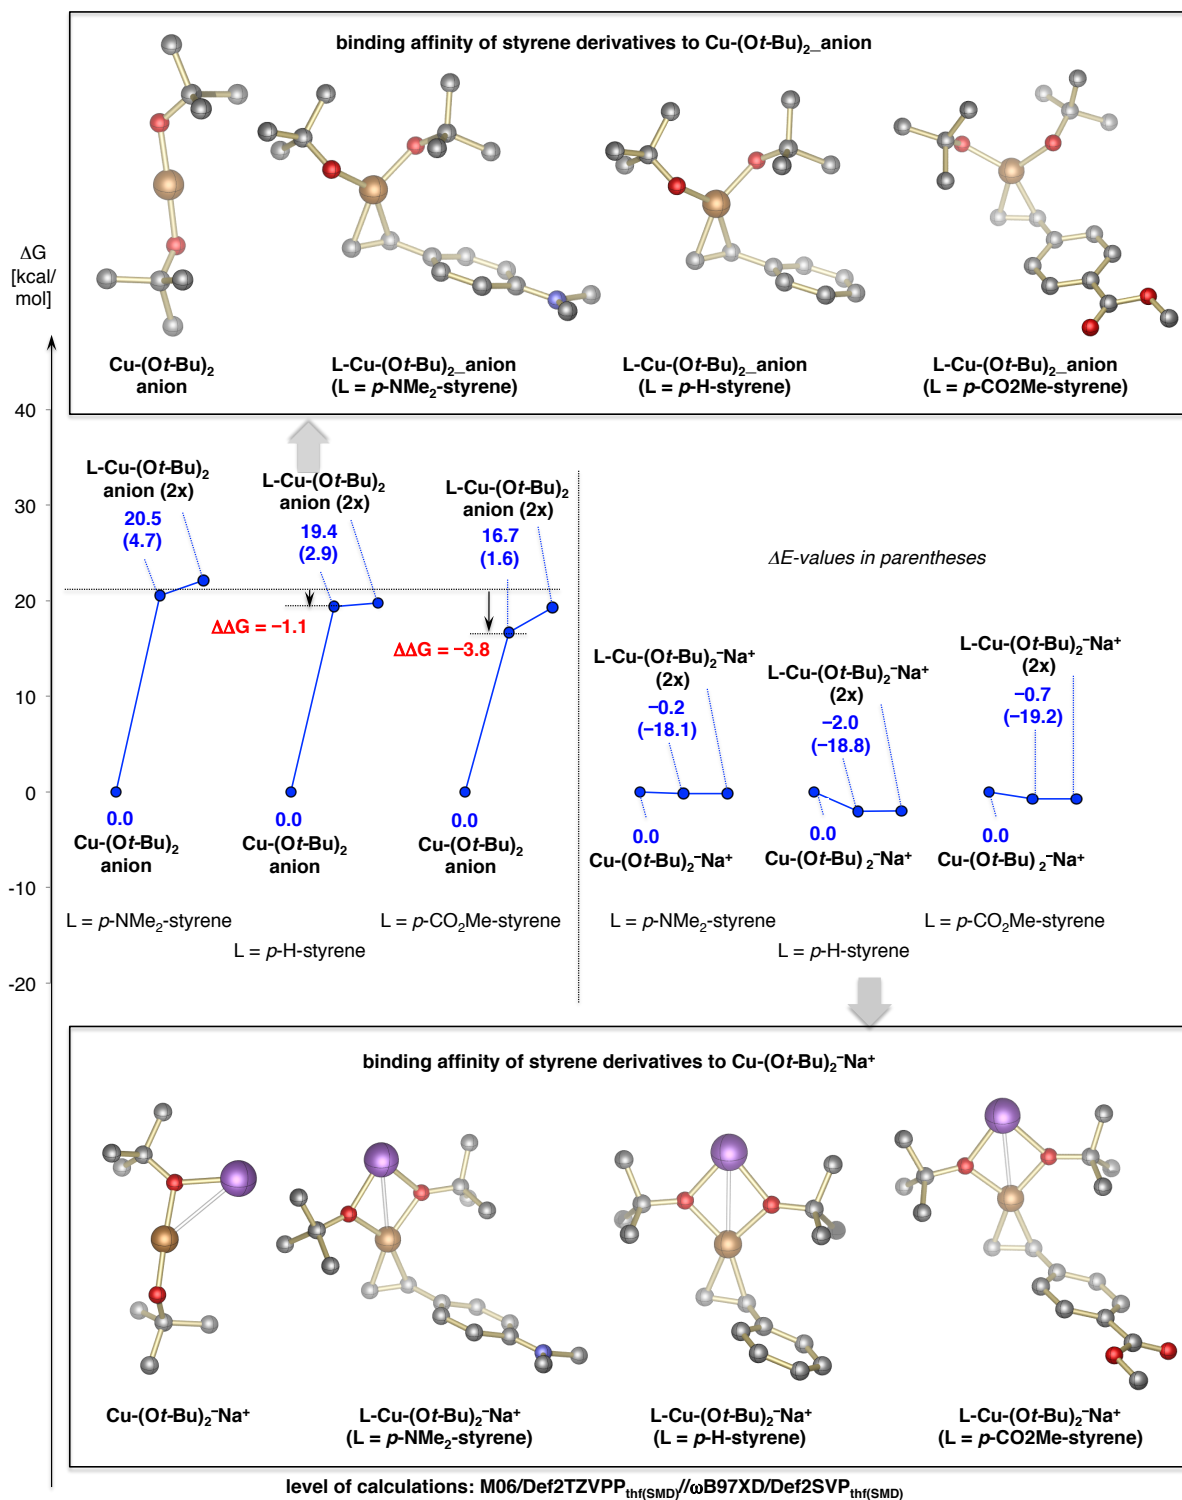

**Figure 9.1.** Free energy surfaces for binding affinity of various styrene derivatives (*p*-Me<sub>2</sub>N, *p*-H (styrene) and *p*-CO<sub>2</sub>Me) to the  $\text{Cu-O}t\text{-Bu})_2^-$  (left) and the species bound to Na ( $\text{Cu-O}t\text{-Bu})_2^- \text{Na}^+$  (left) at the M06/Def2TZVPP<sub>thf(SMD)</sub>/ωB97XD/Def2SVP<sub>thf(SMD)</sub> level. Several conformers are shown. The free energies have been referenced to the linear structures for  $\text{Cu-O}t\text{-Bu})_2^-$  and  $\text{Cu-O}t\text{-Bu})_2^- \text{Na}^+$ .

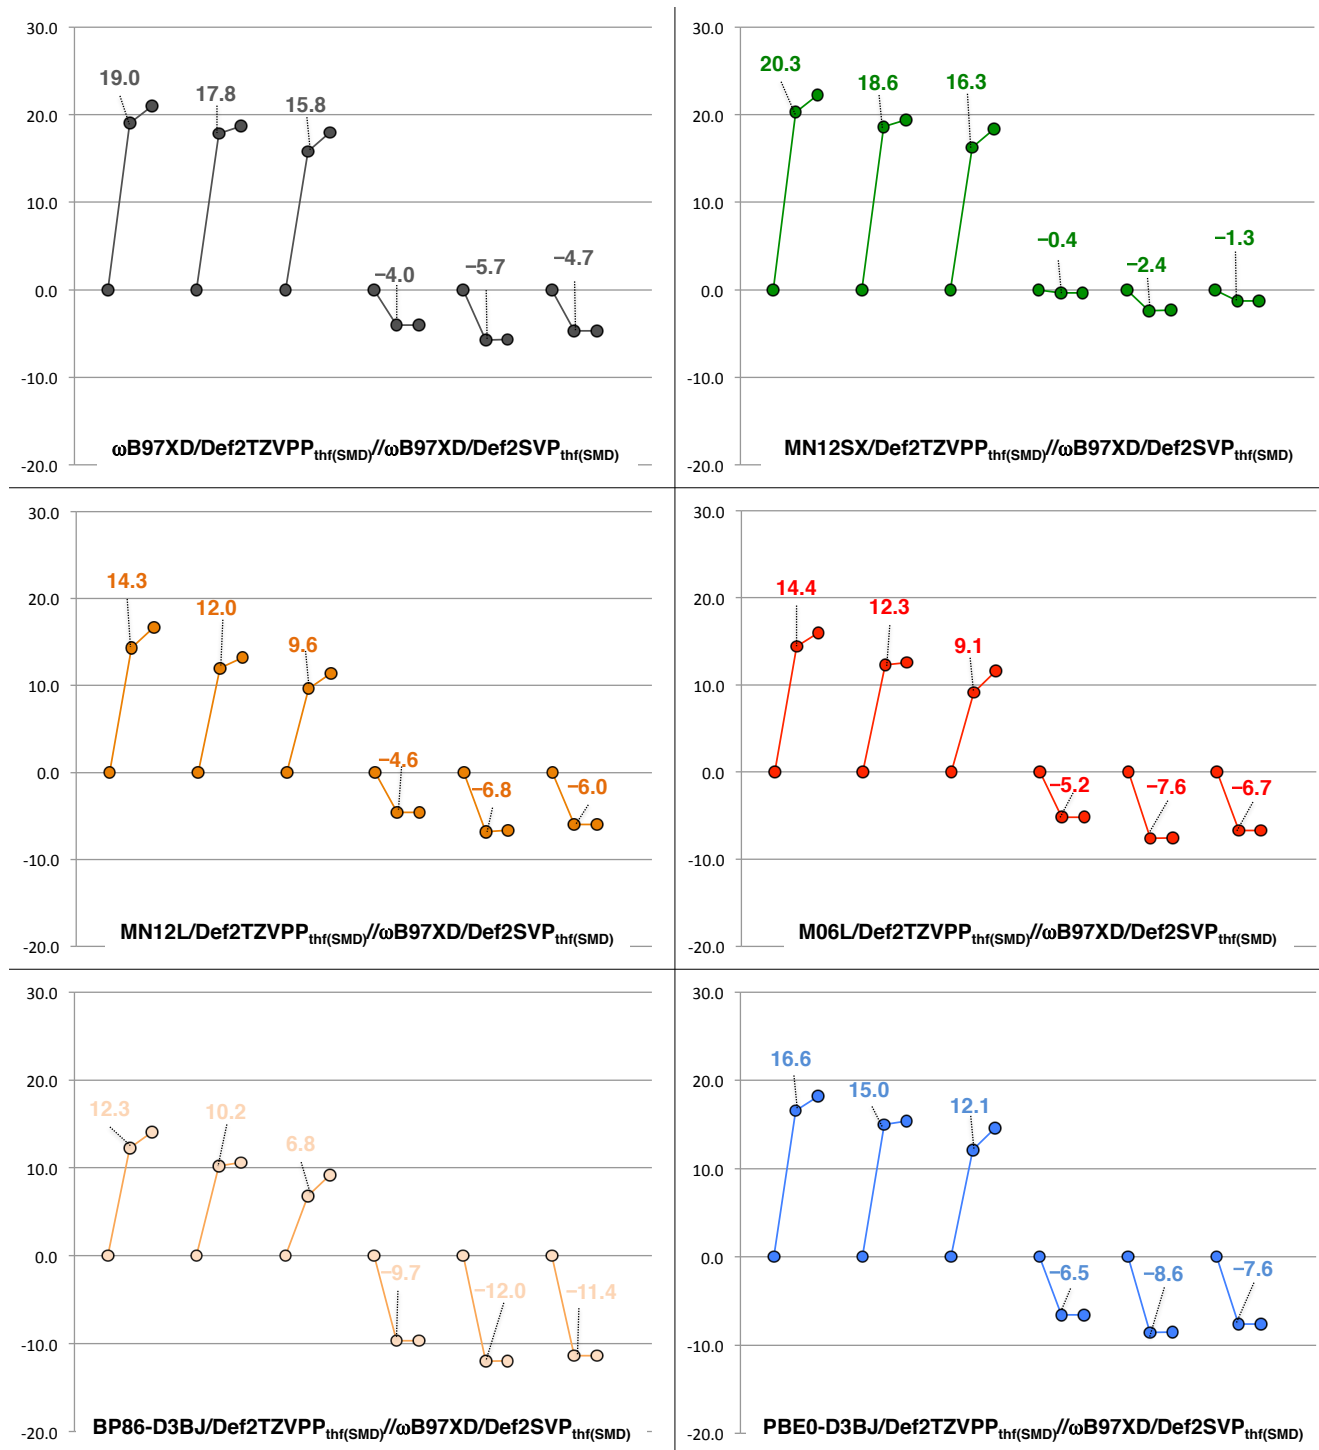

**Figure 9.2.** Free energy surfaces for binding affinity of various styrene derivatives (*p*-Me<sub>2</sub>N, *p*-H and *p*-CO<sub>2</sub>Me) to the Cu-Ot-Bu<sub>2</sub><sup>-</sup> (left) and the species bound to Na (Cu-Ot-Bu<sub>2</sub><sup>-</sup>Na<sup>+</sup>) (left) with various density functionals after optimization with ωB97XD/Def2SVP<sub>thr(SMD)</sub>. For details, see Figure 9.1.

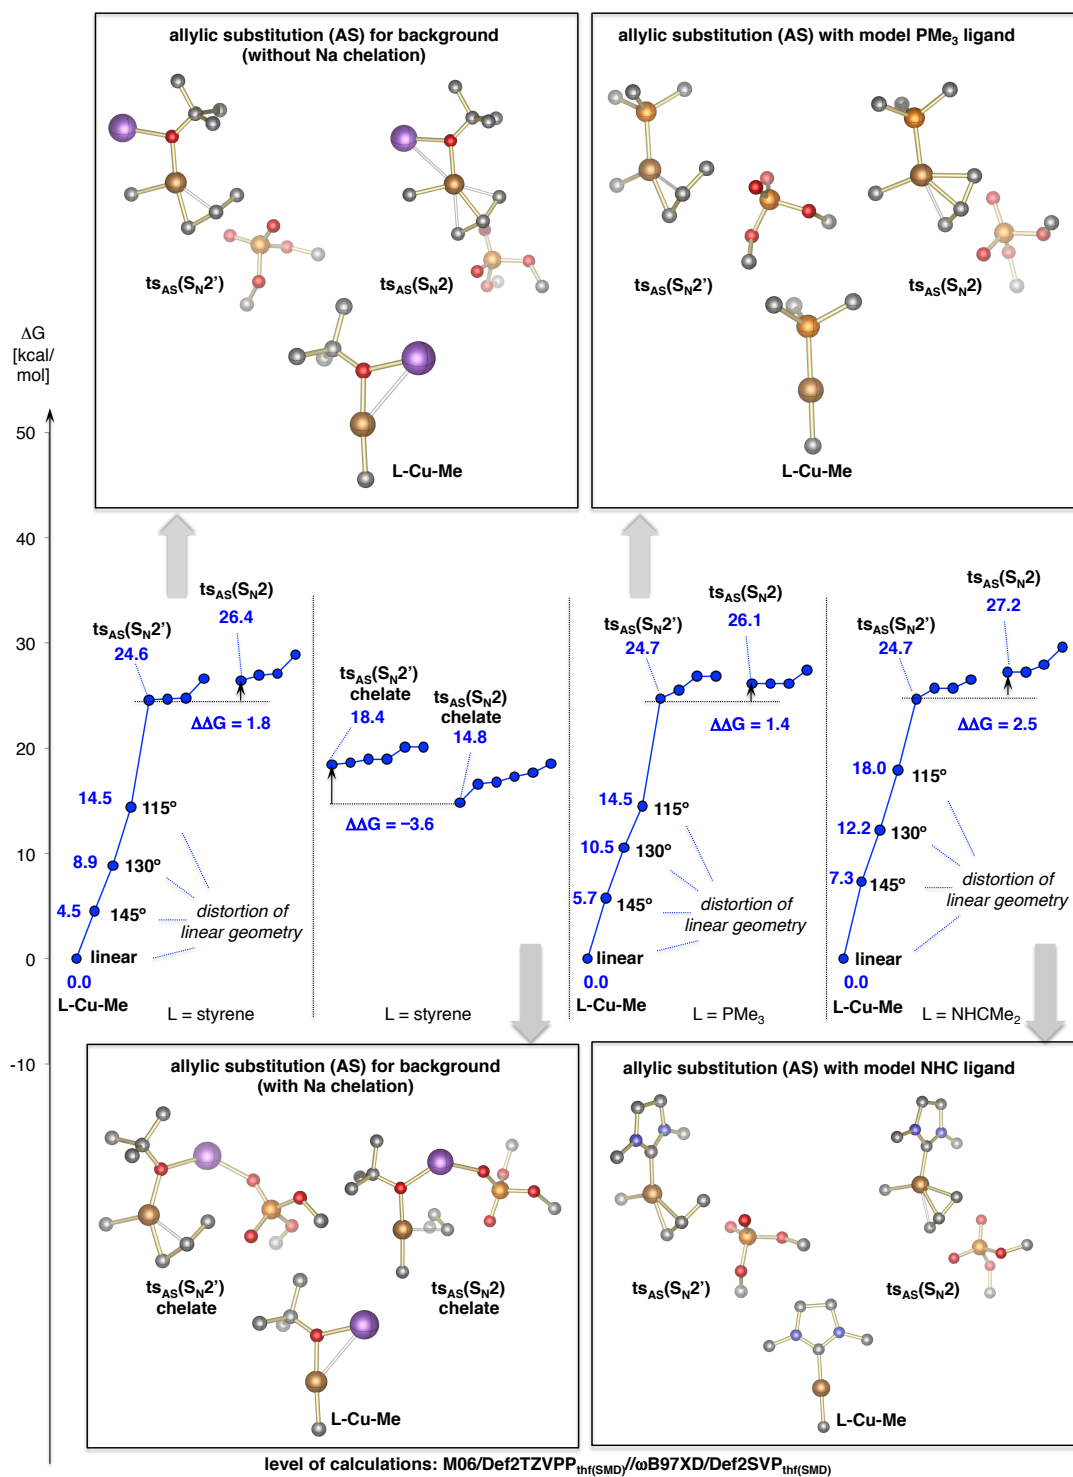

**Figure 10.1.** Free energy surfaces for  $\text{S}_{\text{N}}2'$ - and  $\text{S}_{\text{N}}2$ -type allylic substitution (AS) transition states with either a  $\text{NaOt-Bu}$  molecule, model phosphine ligand ( $\text{PMe}_3$ ) or model NHC ligand ( $\text{NHCMe}_2$ ) as the supporting ligand at the M06/DefTZVPP<sub>thr(SMD)</sub>// $\omega$ B97XD/Def2SVP<sub>thr(SMD)</sub> level. Several conformers are shown for  $\text{ts}_{\text{AS}}(\text{S}_{\text{N}}2')$  and  $\text{ts}_{\text{AS}}(\text{S}_{\text{N}}2)$ . The free energies have been referenced to linear Cu-alkyl species (L-Cu-Me); the alkyl group has been approximated by methyl (Me); only computed structures for the most stable conformers are displayed.

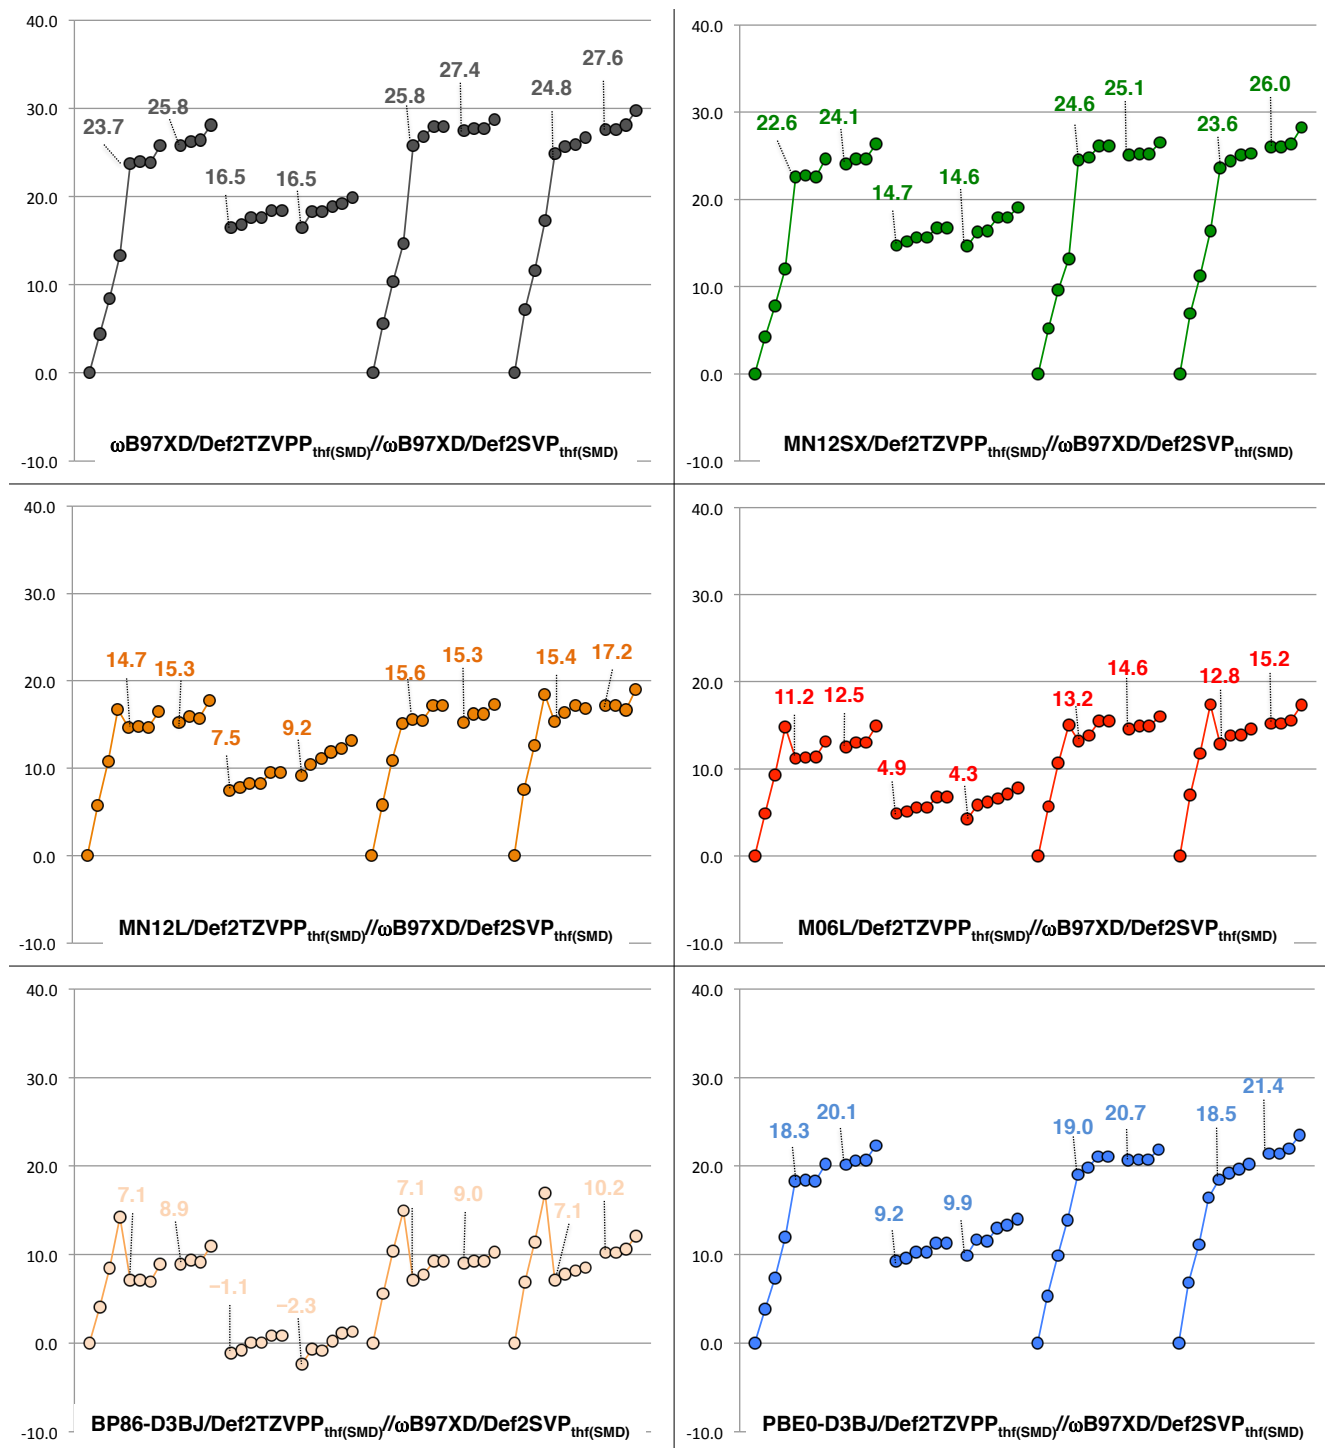

**Figure 10.2.** Free energy surfaces for  $S_N2'$ - and  $S_N2$ -type allylic substitution (AS) transition states with either a NaO*t*-Bu molecule, model phosphine ligand (**PMe**<sub>3</sub>) or model NHC ligand (**NHCMe**<sub>2</sub>) as the supporting ligand with various density functionals after optimization with  $\omega$ B97XD/Def2SVP<sub>thf(SMD)</sub>. For details, see Figure 10.1.

## 19. Energies and Gibbs Free Energies

Optimization in Figures 1–10 with  $\omega$ B97XD/Def2SVP in THF(SMD)

| Structure                      | $\omega$ B97XD/Def2SVP in THF(SMD) |                |            |              |              |            |                          |                     |
|--------------------------------|------------------------------------|----------------|------------|--------------|--------------|------------|--------------------------|---------------------|
|                                | E                                  | E(sum)         | $\Delta E$ | G            | G(sum)       | $\Delta G$ | $\Delta G_{\text{corr}}$ | Freq                |
|                                | [hartree]                          | [hartree]      | [kcal/mol] | [hartree]    | [hartree]    | [kcal/mol] | [kcal/mol]               | [cm <sup>-1</sup> ] |
| B2pin2                         | -821.73060091                      |                |            | -821.411205  |              |            |                          | 32.2                |
| tBuO-Bpin                      | -643.76963843                      |                |            | -643.500916  |              |            |                          | 42.6                |
| NaOtBu                         | -395.11737857                      |                |            | -395.027576  |              |            |                          | 32.7                |
| ligand L3a                     | -2627.35914104                     |                |            | -2626.737897 |              |            |                          | 15.4                |
| NHMe2                          | -305.69353942                      |                |            | -305.575630  |              |            |                          | 35.8                |
| PMe3                           | -460.86841611                      |                |            | -460.785102  |              |            |                          | 167.4               |
| thf                            | -232.21317836                      |                |            | -232.123926  |              |            |                          | 60.3                |
| para-NMe2-styrene              | -443.16696271                      |                |            | -442.996908  |              |            |                          | 46.1                |
| para-H-styrene                 | -309.32723533                      |                |            | -309.224950  |              |            |                          | 23.5                |
| para-CO2Me-styrene             | -536.97246602                      |                |            | -536.832975  |              |            |                          | 36.3                |
| allylphosphate                 | -838.81191878                      |                |            | -838.683113  |              |            |                          | 44.2                |
| PMe3-Cu-H                      | -2101.82973385                     |                |            | -2101.744300 |              |            |                          | 97.9                |
| NHMe2-Cu-H                     | -1946.68467112                     |                |            | -1946.562466 |              |            |                          | 61.4                |
| para-NMe2-styrene-Cu-H         | -2084.11501069                     |                |            | -2083.940445 |              |            |                          | 54.8                |
| para-H-styrene-Cu-H            | -1950.27347322                     |                |            | -1950.168006 |              |            |                          | 32.1                |
| para-CO2Me-styrene-Cu-H        | -2177.91838845                     |                |            | -2177.775488 |              |            |                          | 43.0                |
| <b>Figure 1</b>                |                                    |                |            |              |              |            |                          |                     |
| Figure 1_L-Cu-OtBu             | -4500.61984018                     | -2360.54889695 | 19.7       | -4499.883173 | -2360.280515 | 18.5       | -1.2                     | -20.3               |
| Figure 1_ed                    | -5322.37772681                     | -2360.57618267 | 2.6        | -5321.284871 | -2360.271008 | 24.5       | 21.9                     | 19.1                |
| Figure 1_ts(TB)_01             | -5322.37787478                     | -2360.57633064 | 2.5        | -5321.287061 | -2360.273198 | 23.1       | 20.6                     | -98.5               |
| Figure 1_ts(TB)_02             | -5322.36659501                     | -2360.56505087 | 9.6        | -5321.279707 | -2360.265844 | 27.7       | 18.1                     | -95.3               |
| Figure 1_ts(TB)_03             | -5322.37581050                     | -2360.57426636 | 3.8        | -5321.282963 | -2360.269100 | 25.7       | 21.9                     | -111.0              |
| Figure 1_prod                  | -5322.40355860                     | -2360.60201446 | -13.6      | -5321.318962 | -2360.305099 | 3.1        | 16.7                     | 15.2                |
| Figure 1_L-Cu-Bpin_01          | -4678.61224218                     | -2360.58033647 | 0.0        | -4677.822972 | -2360.310025 | 0.0        | 0.0                      | 16.6                |
| Figure 1_L-Cu-Bpin_02          | -4678.61215750                     | -2360.58025179 | 0.1        | -4677.820859 | -2360.307912 | 1.3        | 1.3                      | 15.2                |
| Figure 1_L-Cu-Bpin_03          | -4678.60409663                     | -2360.57219092 | 5.1        | -4677.818156 | -2360.305209 | 3.0        | -2.1                     | 12.8                |
| Figure 1_L-Cu-Bpin_04          | -4678.60278859                     | -2360.57088288 | 5.9        | -4677.814737 | -2360.301790 | 5.2        | -0.8                     | 10.3                |
| Figure 1_L-Cu-Bpin_05          | -4678.60699442                     | -2360.57508871 | 3.3        | -4677.816027 | -2360.303080 | 4.4        | 1.1                      | 13.8                |
| Figure 1_L-Cu-Bpin_06          | -4678.60363299                     | -2360.57172728 | 5.4        | -4677.813881 | -2360.300934 | 5.7        | 0.3                      | 17.3                |
| Figure 1_L-Cu-Bpin_07          | -4678.60209838                     | -2360.57019267 | 6.4        | -4677.813830 | -2360.300883 | 5.7        | -0.6                     | 15.7                |
| Figure 1_L-Cu-Bpin_08          | -4678.60272089                     | -2360.57081518 | 6.0        | -4677.811593 | -2360.298646 | 7.1        | 1.2                      | 15.2                |
| Figure 1_L-Cu-Bpin_09          | -4678.60328369                     | -2360.57137798 | 5.6        | -4677.811861 | -2360.298914 | 7.0        | 1.4                      | 16.3                |
| Figure 1_pcl_major01_01        | -4987.95820018                     | -2360.59905914 | -11.7      | -4987.035954 | -2360.298057 | 7.5        | 19.3                     | 20.3                |
| Figure 1_pcl_major01_02        | -4987.95729960                     | -2360.59815856 | -11.2      | -4987.036317 | -2360.298420 | 7.3        | 18.5                     | 12.2                |
| Figure 1_pcl_major01_03        | -4987.95729939                     | -2360.59815835 | -11.2      | -4987.036298 | -2360.298401 | 7.3        | 18.5                     | 12.4                |
| Figure 1_ts(CuBadd)_major01_01 | -4987.95489151                     | -2360.59575047 | -9.7       | -4987.034973 | -2360.297076 | 8.1        | 17.8                     | -155.3              |
| Figure 1_ts(CuBadd)_major01_02 | -4987.95448195                     | -2360.59534091 | -9.4       | -4987.031999 | -2360.294102 | 10.0       | 19.4                     | -142.5              |
| Figure 1_ts(CuBadd)_major01_03 | -4987.95448188                     | -2360.59534084 | -9.4       | -4987.031999 | -2360.294102 | 10.0       | 19.4                     | -142.5              |
| Figure 1_ts(CuBadd)_major01_04 | -4987.94957683                     | -2360.59043579 | -6.3       | -4987.027592 | -2360.289695 | 12.8       | 19.1                     | -183.2              |
| Figure 1_ts(CuBadd)_major01_05 | -4987.94957683                     | -2360.59043579 | -6.3       | -4987.027592 | -2360.289695 | 12.8       | 19.1                     | -183.2              |
| Figure 1_ts(CuBadd)_major01_06 | -4987.94669284                     | -2360.58755180 | -4.5       | -4987.022574 | -2360.284677 | 15.9       | 20.4                     | -34.6               |
| Figure 1_L-Cu-alkyl_major01_01 | -4988.00639632                     | -2360.64725528 | -42.0      | -4987.086183 | -2360.348286 | -24.0      | 18.0                     | 6.0                 |
| Figure 1_L-Cu-alkyl_major01_02 | -4988.00658408                     | -2360.64744304 | -42.1      | -4987.085455 | -2360.347558 | -23.6      | 18.6                     | 16.0                |

|                                |                |                |       |              |              |       |      |        |
|--------------------------------|----------------|----------------|-------|--------------|--------------|-------|------|--------|
| Figure 1_L-Cu-alkyl_major01_03 | -4988.00414970 | -2360.64500866 | -40.6 | -4987.080469 | -2360.342572 | -20.4 | 20.2 | 20.4   |
| Figure 1_pcl_major02_01        | -4987.94730466 | -2360.58816362 | -4.9  | -4987.028668 | -2360.290771 | 12.1  | 17.0 | 7.2    |
| Figure 1_pcl_major02_02        | -4987.94730699 | -2360.58816595 | -4.9  | -4987.027447 | -2360.289550 | 12.8  | 17.8 | 9.8    |
| Figure 1_pcl_major02_03        | -4987.95173049 | -2360.59258945 | -7.7  | -4987.026764 | -2360.288867 | 13.3  | 21.0 | 15.2   |
| Figure 1_ts(CuBadd)_major02_01 | -4987.94649355 | -2360.58735251 | -4.4  | -4987.024141 | -2360.286244 | 14.9  | 19.3 | -62.9  |
| Figure 1_ts(CuBadd)_major02_02 | -4987.94870159 | -2360.58956055 | -5.8  | -4987.024476 | -2360.286579 | 14.7  | 20.5 | -97.7  |
| Figure 1_ts(CuBadd)_major02_03 | -4987.94870162 | -2360.58956058 | -5.8  | -4987.024475 | -2360.286578 | 14.7  | 20.5 | -97.7  |
| Figure 1_ts(CuBadd)_major02_04 | -4987.94870153 | -2360.58956049 | -5.8  | -4987.024475 | -2360.286578 | 14.7  | 20.5 | -97.7  |
| Figure 1_ts(CuBadd)_major02_05 | -4987.93948747 | -2360.58034643 | 0.0   | -4987.017450 | -2360.279553 | 19.1  | 19.1 | -189.6 |
| Figure 1_ts(CuBadd)_major02_06 | -4987.94647940 | -2360.58733836 | -4.4  | -4987.020640 | -2360.282743 | 17.1  | 21.5 | -60.6  |
| Figure 1_ts(CuBadd)_major02_07 | -4987.93946936 | -2360.58032832 | 0.0   | -4987.015741 | -2360.277844 | 20.2  | 20.2 | -190.1 |
| Figure 1_ts(CuBadd)_major02_08 | -4987.93238186 | -2360.57324082 | 4.5   | -4987.009842 | -2360.271945 | 23.9  | 19.4 | -166.4 |
| Figure 1_L-Cu-alkyl_major02_01 | -4988.01015868 | -2360.65101764 | -44.4 | -4987.088862 | -2360.350965 | -25.7 | 18.7 | 10.1   |
| Figure 1_L-Cu-alkyl_major02_02 | -4988.00339175 | -2360.64425071 | -40.1 | -4987.079472 | -2360.341575 | -19.8 | 20.3 | 16.4   |
| Figure 1_pcl_minor01_01        | -4987.94988378 | -2360.59074274 | -6.5  | -4987.032226 | -2360.294329 | 9.8   | 16.4 | 16.6   |
| Figure 1_pcl_minor01_02        | -4987.95193410 | -2360.59279306 | -7.8  | -4987.032908 | -2360.295011 | 9.4   | 17.2 | 12.4   |
| Figure 1_pcl_minor01_03        | -4987.95470336 | -2360.59556232 | -9.6  | -4987.031607 | -2360.293710 | 10.2  | 19.8 | 27.1   |
| Figure 1_pcl_minor01_04        | -4987.95276732 | -2360.59362628 | -8.3  | -4987.031341 | -2360.293444 | 10.4  | 18.7 | 16.3   |
| Figure 1_pcl_minor01_05        | -4987.95012928 | -2360.59098824 | -6.7  | -4987.027985 | -2360.290088 | 12.5  | 19.2 | 21.5   |
| Figure 1_ts(CuBadd)_minor01_01 | -4987.94730051 | -2360.58815947 | -4.9  | -4987.026703 | -2360.288806 | 13.3  | 18.2 | -107.9 |
| Figure 1_ts(CuBadd)_minor01_02 | -4987.94593447 | -2360.58679343 | -4.1  | -4987.025448 | -2360.287551 | 14.1  | 18.2 | -131.7 |
| Figure 1_ts(CuBadd)_minor01_03 | -4987.94518213 | -2360.58604109 | -3.6  | -4987.023435 | -2360.285538 | 15.4  | 18.9 | -182.9 |
| Figure 1_ts(CuBadd)_minor01_04 | -4987.94747424 | -2360.58833320 | -5.0  | -4987.023545 | -2360.285648 | 15.3  | 20.3 | -174.4 |
| Figure 1_ts(CuBadd)_minor01_05 | -4987.94747424 | -2360.58833320 | -5.0  | -4987.023545 | -2360.285648 | 15.3  | 20.3 | -174.4 |
| Figure 1_ts(CuBadd)_minor01_06 | -4987.94708758 | -2360.58794654 | -4.8  | -4987.024219 | -2360.286322 | 14.9  | 19.6 | -81.7  |
| Figure 1_ts(CuBadd)_minor01_07 | -4987.94846380 | -2360.58932276 | -5.6  | -4987.023375 | -2360.285478 | 15.4  | 21.0 | -106.3 |
| Figure 1_ts(CuBadd)_minor01_08 | -4987.94719470 | -2360.58805366 | -4.8  | -4987.021546 | -2360.283649 | 16.6  | 21.4 | -103.8 |
| Figure 1_L-Cu-alkyl_minor01_01 | -4988.00887570 | -2360.64973466 | -43.5 | -4987.089141 | -2360.351244 | -25.9 | 17.7 | 18.8   |
| Figure 1_L-Cu-alkyl_minor01_02 | -4987.99955082 | -2360.64040978 | -37.7 | -4987.081186 | -2360.343289 | -20.9 | 16.8 | 14.4   |
| Figure 1_L-Cu-alkyl_minor01_03 | -4988.00110311 | -2360.64196207 | -38.7 | -4987.079264 | -2360.341367 | -19.7 | 19.0 | 19.6   |
| Figure 1_L-Cu-alkyl_minor01_04 | -4987.99975913 | -2360.64061809 | -37.8 | -4987.077693 | -2360.339796 | -18.7 | 19.1 | 21.3   |
| Figure 1_L-Cu-alkyl_minor01_05 | -4987.99842918 | -2360.63928814 | -37.0 | -4987.072552 | -2360.334655 | -15.5 | 21.5 | 21.2   |
| Figure 1_pcl_minor02_01        | -4987.96129307 | -2360.60215203 | -13.7 | -4987.044965 | -2360.307068 | 1.9   | 15.5 | 14.5   |
| Figure 1_pcl_minor02_02        | -4987.94484714 | -2360.58570610 | -3.4  | -4987.026370 | -2360.288473 | 13.5  | 16.9 | 4.4    |
| Figure 1_pcl_minor02_03        | -4987.95227656 | -2360.59313552 | -8.0  | -4987.030755 | -2360.292858 | 10.8  | 18.8 | 8.2    |
| Figure 1_pcl_minor02_04        | -4987.93892719 | -2360.57978615 | 0.3   | -4987.019375 | -2360.281478 | 17.9  | 17.6 | 7.9    |
| Figure 1_ts(CuBadd)_minor02_01 | -4987.94770508 | -2360.58856404 | -5.2  | -4987.026330 | -2360.288433 | 13.5  | 18.7 | -69.3  |
| Figure 1_ts(CuBadd)_minor02_02 | -4987.95176996 | -2360.59262892 | -7.7  | -4987.027283 | -2360.289386 | 13.0  | 20.7 | -106.0 |
| Figure 1_ts(CuBadd)_minor02_03 | -4987.95176079 | -2360.59261975 | -7.7  | -4987.027164 | -2360.289267 | 13.0  | 20.7 | -108.5 |
| Figure 1_ts(CuBadd)_minor02_04 | -4987.94109714 | -2360.58195610 | -1.0  | -4987.017140 | -2360.279243 | 19.3  | 20.3 | -155.1 |
| Figure 1_ts(CuBadd)_minor02_05 | -4987.94907131 | -2360.58993027 | -6.0  | -4987.022458 | -2360.284561 | 16.0  | 22.0 | -186.3 |
| Figure 1_ts(CuBadd)_minor02_06 | -4987.93299261 | -2360.57385157 | 4.1   | -4987.009729 | -2360.271832 | 24.0  | 19.9 | -157.3 |
| Figure 1_L-Cu-alkyl_minor02_01 | -4988.00284447 | -2360.64370343 | -39.8 | -4987.080286 | -2360.342389 | -20.3 | 19.5 | 18.5   |
| Figure 1_L-Cu-alkyl_minor02_02 | -4988.00460427 | -2360.64546323 | -40.9 | -4987.080632 | -2360.342735 | -20.5 | 20.3 | 19.5   |
| Figure 1_L-Cu-alkyl_minor02_03 | -4987.99535033 | -2360.63620929 | -35.1 | -4987.074610 | -2360.336713 | -16.7 | 18.3 | 13.4   |
| Figure 1_L-Cu-alkyl_minor02_04 | -4987.99700051 | -2360.63785947 | -36.1 | -4987.075717 | -2360.337820 | -17.4 | 18.7 | -32.4  |
| Figure 1_L-Cu-alkyl_major_01   | -4988.00213073 | -2360.64298969 | -39.3 | -4987.085657 | -2360.347760 | -23.7 | 15.6 | 5.5    |
| Figure 1_L-Cu-alkyl_major_02   | -4988.00326436 | -2360.64412332 | -40.0 | -4987.084106 | -2360.346209 | -22.7 | 17.3 | 12.4   |
| Figure 1_L-Cu-alkyl_major_03   | -4988.00032240 | -2360.64118136 | -38.2 | -4987.082117 | -2360.344220 | -21.5 | 16.7 | 13.6   |
| Figure 1_pc3_major_01          | -5826.83109267 | -2360.66003285 | -50.0 | -5825.753158 | -2360.332148 | -13.9 | 36.1 | 13.7   |
| Figure 1_pc3_major_02          | -5826.83024921 | -2360.65918939 | -49.5 | -5825.751679 | -2360.330669 | -13.0 | 36.5 | 19.6   |
| Figure 1_pc3_major_03          | -5826.82859981 | -2360.65753999 | -48.4 | -5825.751666 | -2360.330656 | -12.9 | 35.5 | 5.2    |
| Figure 1_pc3_major_04          | -5826.82790049 | -2360.65684067 | -48.0 | -5825.746846 | -2360.325836 | -9.9  | 38.1 | 12.3   |
| Figure 1_ts(AS)_major_01       | -5826.79676454 | -2360.62570472 | -28.5 | -5825.720386 | -2360.299376 | 6.7   | 35.2 | -342.4 |
| Figure 1_ts(AS)_major_02       | -5826.79516945 | -2360.62410963 | -27.5 | -5825.718840 | -2360.297830 | 7.7   | 35.1 | -325.1 |
| Figure 1_ts(AS)_major_03       | -5826.79145442 | -2360.62039460 | -25.1 | -5825.715540 | -2360.294530 | 9.7   | 34.9 | -196.6 |
| Figure 1_ts(AS)_major_04       | -5826.79527463 | -2360.62421481 | -27.5 | -5825.716136 | -2360.295126 | 9.3   | 36.9 | -325.3 |
| Figure 1_ts(AS)_major_05       | -5826.77845892 | -2360.60739910 | -17.0 | -5825.701647 | -2360.280637 | 18.4  | 35.4 | -202.7 |
| Figure 1_ts(AS)_major_06       | -5826.78081695 | -2360.60975713 | -18.5 | -5825.702704 | -2360.281694 | 17.8  | 36.2 | -282.9 |

|                            |                |                |       |              |              |      |      |      |
|----------------------------|----------------|----------------|-------|--------------|--------------|------|------|------|
| Figure 1_pi-allyl_major_01 | -5826.81392270 | -2360.64286288 | -39.2 | -5825.734019 | -2360.313009 | -1.9 | 37.4 | 20.4 |
| Figure 1_pi-allyl_major_02 | -5826.80177164 | -2360.63071182 | -31.6 | -5825.726513 | -2360.305503 | 2.8  | 34.4 | 15.5 |
| Figure 1_pi-allyl_major_03 | -5826.80299964 | -2360.63193982 | -32.4 | -5825.724145 | -2360.303135 | 4.3  | 36.7 | 13.0 |

## Figure 2

|                                   |                |                |       |              |              |       |      |        |
|-----------------------------------|----------------|----------------|-------|--------------|--------------|-------|------|--------|
| Figure 2_L-Cu-OtBu_dimer          | -4357.97211601 | -2360.58071639 | -0.2  | -4357.482114 | -2360.300666 | 5.9   | 6.1  | -19.9  |
| Figure 2_L-Cu-OtBu                | -2178.96309100 | -2360.55774939 | 14.2  | -2178.731353 | -2360.290962 | 12.0  | -2.2 | 32.4   |
| Figure 2_ed                       | -3000.72395415 | -2360.58801163 | -4.8  | -3000.145542 | -2360.293946 | 10.1  | 14.9 | -18.4  |
| Figure 2_ts(TB)                   | -3000.72314236 | -2360.58719984 | -4.3  | -3000.146659 | -2360.295063 | 9.4   | 13.7 | -71.6  |
| Figure 2_prod                     | -3000.74272641 | -2360.60678389 | -16.6 | -3000.165591 | -2360.313995 | -2.5  | 14.1 | 20.4   |
| Figure 2_L-Cu-Bpin                | -2356.95154150 | -2360.58523741 | -3.1  | -2356.666415 | -2360.315735 | -3.6  | -0.5 | 22.1   |
| Figure 2_para-NMe2_pc1            | -2800.13914226 | -2360.60587547 | -16.0 | -2799.660203 | -2360.312615 | -1.6  | 14.4 | 11.8   |
| Figure 2_para-NMe2_ts(CuBadd)     | -2800.12649875 | -2360.59323196 | -8.1  | -2799.646765 | -2360.299177 | 6.8   | 14.9 | -191.7 |
| Figure 2_para-NMe2_L-Cu-alkyl_01  | -2800.18197688 | -2360.64871009 | -42.9 | -2799.700849 | -2360.353261 | -27.1 | 15.8 | 12.1   |
| Figure 2_para-NMe2_L-Cu-alkyl_02  | -2800.17645420 | -2360.64318741 | -39.4 | -2799.693286 | -2360.345698 | -22.4 | 17.1 | 21.4   |
| Figure 2_para-NMe2_L-Cu-alkyl_03  | -2800.17710480 | -2360.64383801 | -39.8 | -2799.694336 | -2360.346748 | -23.0 | 16.8 | -13.5  |
| Figure 2_para-NMe2_ts(BHE)        | -2800.13027722 | -2360.59701043 | -10.5 | -2799.652836 | -2360.305248 | 3.0   | 13.5 | 940.8  |
| Figure 2_para-NMe2_pc2            | -2800.16816835 | -2360.63490156 | -34.2 | -2799.690028 | -2360.342440 | -20.3 | 13.9 | 25.4   |
| Figure 2_para-NMe2_ts(H>B)        | -2800.15510862 | -2360.62184183 | -26.0 | -2799.676241 | -2360.328653 | -11.7 | 14.4 | -383.4 |
| Figure 2_para-NMe2_int1           | -2800.15704127 | -2360.62377448 | -27.3 | -2799.677584 | -2360.329996 | -12.5 | 14.7 | 23.8   |
| Figure 2_para-NMe2_ts(Cu>O)       | -2800.15146860 | -2360.61820181 | -23.8 | -2799.673509 | -2360.325921 | -10.0 | 13.8 | -50.0  |
| Figure 2_para-NMe2_int2           | -2800.15550685 | -2360.62224006 | -26.3 | -2799.678077 | -2360.330489 | -12.8 | 13.5 | 11.3   |
| Figure 2_para-NMe2_ts(C-Brot)     | -2800.15035858 | -2360.61709179 | -23.1 | -2799.671196 | -2360.323608 | -8.5  | 14.5 | -85.1  |
| Figure 2_para-NMe2_int3           | -2800.15493149 | -2360.62166470 | -25.9 | -2799.676698 | -2360.329110 | -12.0 | 14.0 | 16.6   |
| Figure 2_para-NMe2-alkenylBpin    | -853.45693444  | -2360.60833876 | -17.6 | -853.124922  | -2360.339800 | -18.7 | -1.1 | 23.2   |
| Figure 2_para-NMe2_pc2_rev        | -2800.16441697 | -2360.63115018 | -31.9 | -2799.685687 | -2360.338099 | -17.6 | 14.3 | 18.9   |
| Figure 2_para-NMe2_ts(CuHadd_rev) | -2800.14106095 | -2360.60779416 | -17.2 | -2799.662044 | -2360.314456 | -2.8  | 14.4 | -810.5 |
| Figure 2_para-NMe2_L-Cu-alkyl_rev | -2800.19059809 | -2360.65733130 | -48.3 | -2799.706987 | -2360.359399 | -31.0 | 17.3 | 17.9   |
| Figure 2_para-NMe2_pc3_01         | -3639.01987332 | -2360.67468775 | -59.2 | -3638.378684 | -2360.347983 | -23.8 | 35.4 | 17.3   |
| Figure 2_para-NMe2_pc3_02         | -3639.01951463 | -2360.67432906 | -59.0 | -3638.381124 | -2360.350423 | -25.4 | 33.6 | 15.6   |
| Figure 2_para-NMe2_ts(AS)_01      | -3638.99054294 | -2360.64535737 | -40.8 | -3638.356188 | -2360.325487 | -9.7  | 31.1 | -333.2 |
| Figure 2_para-NMe2_ts(AS)_02      | -3638.99039008 | -2360.64520451 | -40.7 | -3638.352747 | -2360.322046 | -7.5  | 33.2 | -339.4 |
| Figure 2_para-NMe2_pi-allyl_01    | -3639.01658157 | -2360.67139600 | -57.1 | -3638.374596 | -2360.343895 | -21.3 | 35.9 | 26.6   |
| Figure 2_para-NMe2_pi-allyl_02    | -3639.01320290 | -2360.66801733 | -55.0 | -3638.373862 | -2360.343161 | -20.8 | 34.2 | 11.6   |
| Figure 2_L-Cu-OtBu_dimer          | -4357.97211601 | -2360.58071639 | -0.2  | -4357.482114 | -2360.300666 | 5.9   | 6.1  | -19.9  |
| Figure 2_L-Cu-OtBu                | -2178.96309100 | -2360.55774939 | 14.2  | -2178.731353 | -2360.290962 | 12.0  | -2.2 | 32.4   |
| Figure 2_ed                       | -3000.72395415 | -2360.58801163 | -4.8  | -3000.145542 | -2360.293946 | 10.1  | 14.9 | -18.4  |
| Figure 2_ts(TB)                   | -3000.72314236 | -2360.58719984 | -4.3  | -3000.146659 | -2360.295063 | 9.4   | 13.7 | -71.6  |
| Figure 2_prod                     | -3000.74272641 | -2360.60678389 | -16.6 | -3000.165591 | -2360.313995 | -2.5  | 14.1 | 20.4   |
| Figure 2_L-Cu-Bpin                | -2356.95154150 | -2360.58523741 | -3.1  | -2356.666415 | -2360.315735 | -3.6  | -0.5 | 22.1   |
| Figure 2_para-H_pc1               | -2666.30230457 | -2360.60876515 | -17.8 | -2665.888826 | -2360.313196 | -2.0  | 15.8 | 20.5   |
| Figure 2_para-H_ts(CuBadd)        | -2666.29368708 | -2360.60014766 | -12.4 | -2665.880330 | -2360.304700 | 3.3   | 15.8 | -166.2 |
| Figure 2_para-H_L-Cu-alkyl_01     | -2666.34950794 | -2360.65596852 | -47.5 | -2665.935157 | -2360.359527 | -31.1 | 16.4 | 22.1   |
| Figure 2_para-H_L-Cu-alkyl_02     | -2666.34283721 | -2360.64929779 | -43.3 | -2665.931938 | -2360.356308 | -29.0 | 14.2 | 16.6   |
| Figure 2_para-H_L-Cu-alkyl_03     | -2666.34484998 | -2360.65131056 | -44.5 | -2665.930477 | -2360.354847 | -28.1 | 16.4 | 19.0   |
| Figure 2_para-H_ts(BHE)           | -2666.29763823 | -2360.60409881 | -14.9 | -2665.888544 | -2360.312914 | -1.8  | 13.1 | -918.5 |
| Figure 2_para-H_pc2               | -2666.32935168 | -2360.63581226 | -34.8 | -2665.917508 | -2360.341878 | -20.0 | 14.8 | 30.4   |
| Figure 2_para-H_ts(H>B)           | -2666.31628206 | -2360.62274264 | -26.6 | -2665.908279 | -2360.332649 | -14.2 | 12.4 | -410.7 |
| Figure 2_para-H_int1              | -2666.31795715 | -2360.62441773 | -27.7 | -2665.907555 | -2360.331925 | -13.7 | 13.9 | 20.9   |
| Figure 2_para-H_ts(Cu>O)          | -2666.31305334 | -2360.61951392 | -24.6 | -2665.903312 | -2360.327682 | -11.1 | 13.5 | -46.5  |
| Figure 2_para-H_int2              | -2666.31784905 | -2360.62430963 | -27.6 | -2665.906003 | -2360.330373 | -12.8 | 14.8 | 20.0   |
| Figure 2_para-H_ts(C-Brot)        | -2666.31236794 | -2360.61882852 | -24.2 | -2665.900079 | -2360.324449 | -9.1  | 15.1 | -119.6 |
| Figure 2_para-H_int3              | -2666.31707941 | -2360.62353999 | -27.1 | -2665.907002 | -2360.331372 | -13.4 | 13.7 | 15.9   |
| Figure 2_para-H-alkenylBpin       | -719.61630693  | -2360.60743863 | -17.0 | -719.353090  | -2360.339926 | -18.8 | -1.8 | 11.9   |
| Figure 2_para-H_pc2_rev           | -2666.32621361 | -2360.63267419 | -32.8 | -2665.916493 | -2360.340863 | -19.4 | 13.5 | 23.6   |
| Figure 2_para-H_ts(CuHadd_rev)    | -2666.30378750 | -2360.61024808 | -18.8 | -2665.894788 | -2360.319158 | -5.7  | 13.0 | -811.4 |
| Figure 2_para-H_L-Cu-alkyl_rev    | -2666.35607480 | -2360.66253538 | -51.6 | -2665.941742 | -2360.366112 | -35.2 | 16.4 | 17.9   |









|                                   |                |                |       |              |              |      |      |        |
|-----------------------------------|----------------|----------------|-------|--------------|--------------|------|------|--------|
| Figure 4_para-CO2Me_L-Cu-OtBu     | -2410.19525632 | -2360.51098811 | 43.5  | -2409.941084 | -2360.243348 | 41.8 | -1.7 | 22.9   |
| Figure 4_para-CO2Me_ed            | -3231.96398916 | -2360.54912005 | 19.6  | -3231.360114 | -2360.251173 | 36.9 | 17.3 | 15.2   |
| Figure 4_para-CO2Me_ts(TB)        | -3231.96311685 | -2360.54824774 | 20.1  | -3231.360676 | -2360.251735 | 36.6 | 16.4 | -92.4  |
| Figure 4_para-CO2Me_prod          | -3231.97269053 | -2360.55782142 | 14.1  | -3231.373692 | -2360.264751 | 28.4 | 14.3 | 15.9   |
| Figure 4_para-CO2Me_L-Cu-Bpin     | -2588.18751234 | -2360.54228166 | 23.9  | -2587.879722 | -2360.271697 | 24.1 | 0.2  | 14.5   |
| Figure 4_para-CO2Me_pc1           | -3125.20059961 | -2360.58290291 | -1.6  | -3124.724852 | -2360.283852 | 16.4 | 18.0 | 10.2   |
| Figure 4_para-CO2Me_ts(CuBadd)_01 | -3125.19811105 | -2360.58041435 | 0.0   | -3124.722317 | -2360.281317 | 18.0 | 18.1 | -136.2 |
| Figure 4_para-CO2Me_ts(CuBadd)_02 | -3125.18742203 | -2360.56972533 | 6.7   | -3124.716947 | -2360.275947 | 21.4 | 14.7 | -164.3 |
| Figure 4_para-CO2Me_L-Cu-alkyl_01 | -3125.23833982 | -2360.62064312 | -25.3 | -3124.759063 | -2360.318063 | -5.0 | 20.2 | 21.0   |
| Figure 4_para-CO2Me_L-Cu-alkyl_02 | -3125.23509021 | -2360.61739351 | -23.3 | -3124.760138 | -2360.319138 | -5.7 | 17.5 | 10.9   |
| Figure 4_para-CO2Me_L-Cu-alkyl_03 | -3125.23447326 | -2360.61677656 | -22.9 | -3124.759140 | -2360.318140 | -5.1 | 17.8 | 15.8   |
| Figure 4_para-CO2Me_ts(BHE)       | -3125.19981935 | -2360.58212265 | -1.1  | -3124.727569 | -2360.286569 | 14.7 | 15.8 | -841.5 |
| Figure 4_para-CO2Me_pc2           | -3125.21803273 | -2360.60033603 | -12.5 | -3124.742909 | -2360.301909 | 5.1  | 17.6 | 26.8   |
| Figure 4_para-CO2Me-alkenylBpin   | -947.26105091  | -2360.56174266 | 11.7  | -946.961606  | -2360.296094 | 8.7  | -2.9 | 13.6   |
| Figure 4_para-CO2Me_pc3_01        | -3964.07601958 | -2360.64640410 | -41.5 | -3963.447610 | -2360.323497 | -8.5 | 33.0 | 7.3    |
| Figure 4_para-CO2Me_pc3_02        | -3964.08215085 | -2360.65253537 | -45.3 | -3963.447118 | -2360.323005 | -8.1 | 37.2 | 18.9   |
| Figure 4_para-CO2Me_ts(AS)_01     | -3964.02907638 | -2360.59946090 | -12.0 | -3963.402778 | -2360.278665 | 19.7 | 31.7 | -190.0 |
| Figure 4_para-CO2Me_ts(AS)_02     | -3964.02804325 | -2360.59842777 | -11.4 | -3963.398459 | -2360.274346 | 22.4 | 33.7 | -184.6 |
| Figure 4_para-CO2Me_ts(AS)_03     | -3964.03280404 | -2360.60318856 | -14.3 | -3963.401193 | -2360.277080 | 20.7 | 35.0 | -217.5 |
| Figure 4_para-CO2Me_ts(AS)_04     | -3964.02741833 | -2360.59780285 | -11.0 | -3963.397368 | -2360.273255 | 23.1 | 34.0 | -157.6 |
| Figure 4_para-CO2Me_pi-allyl_01   | -3964.04377838 | -2360.61416290 | -21.2 | -3963.412547 | -2360.288434 | 13.5 | 34.8 | 17.7   |
| Figure 4_para-CO2Me_pi-allyl_02   | -3964.03936221 | -2360.60974673 | -18.5 | -3963.408336 | -2360.284223 | 16.2 | 34.6 | 10.5   |

## Figure 5

|                        |                |                |       |              |              |      |      |        |
|------------------------|----------------|----------------|-------|--------------|--------------|------|------|--------|
| Figure 5_L-Cu-OtBu     | -2105.43166785 | -2360.50668730 | 46.2  | -2105.227438 | -2360.238751 | 44.7 | -1.5 | -23.4  |
| Figure 5_ed            | -2927.19598297 | -2360.54040151 | 25.1  | -2926.648063 | -2360.248171 | 38.8 | 13.8 | 14.3   |
| Figure 5_ts(TB)        | -2927.19056412 | -2360.53498266 | 28.5  | -2926.641767 | -2360.241875 | 42.8 | 14.3 | -26.2  |
| Figure 5_prod          | -2927.22806183 | -2360.57248037 | 4.9   | -2926.678851 | -2360.278959 | 19.5 | 14.6 | 30.9   |
| Figure 5_L-Cu-Bpin     | -2283.43209458 | -2360.54615155 | 21.5  | -2283.176928 | -2360.277952 | 20.1 | -1.3 | 22.8   |
| Figure 5_pc1           | -2592.77992931 | -2360.56675095 | 8.5   | -2592.399223 | -2360.275297 | 21.8 | 13.3 | 19.8   |
| Figure 5_ts(CuBadd)    | -2592.76023309 | -2360.54705473 | 20.9  | -2592.378720 | -2360.254794 | 34.7 | 13.8 | -243.4 |
| Figure 5_L-Cu-alkyl_01 | -2592.82066847 | -2360.60749011 | -17.0 | -2592.436888 | -2360.312962 | -1.8 | 15.2 | 22.2   |
| Figure 5_L-Cu-alkyl_02 | -2592.81753394 | -2360.60435558 | -15.1 | -2592.434281 | -2360.310355 | -0.2 | 14.9 | 23.4   |
| Figure 5_L-Cu-alkyl_03 | -2592.82107598 | -2360.60789762 | -17.3 | -2592.437886 | -2360.313960 | -2.5 | 14.8 | 22.1   |
| Figure 5_ts(BHE)       | -2592.76459029 | -2360.55141193 | 18.2  | -2592.386396 | -2360.262470 | 29.8 | 11.7 | -958.2 |
| Figure 5_pc2           | -2592.80440429 | -2360.59122593 | -6.8  | -2592.425209 | -2360.301283 | 5.5  | 12.3 | -3.3   |
| Figure 5_pc3           | -3431.66328451 | -2360.63818737 | -36.3 | -3431.125429 | -2360.318390 | -5.2 | 31.1 | 14.4   |
| Figure 5_ts(AS)_01     | -3431.62747806 | -2360.60238092 | -13.8 | -3431.087897 | -2360.280858 | 18.3 | 32.1 | -242.0 |
| Figure 5_ts(AS)_02     | -3431.62868825 | -2360.60359111 | -14.6 | -3431.086959 | -2360.279920 | 18.9 | 33.5 | -257.5 |
| Figure 5_pi-allyl      | -3431.66797676 | -2360.64287962 | -39.2 | -3431.127353 | -2360.320314 | -6.5 | 32.8 | 24.3   |

## Figure 8

|                                              |                |                |      |              |              |      |      |       |
|----------------------------------------------|----------------|----------------|------|--------------|--------------|------|------|-------|
| Figure 8_L3a-Cu-OtBu                         | -4500.61984018 | -1873.26069914 | 0.0  | -4499.883173 | -1873.145276 | 0.0  | 0.0  | -20.3 |
| Figure 8_para-NMe2-styrene-Cu-OtBu           | -2316.39314463 | -1873.22618192 | 21.7 | -2316.108013 | -1873.111105 | 21.4 | -0.2 | 15.1  |
| Figure 8_para-NMe2-styrene-Cu-OtBu_dimer_01  | -4632.85611567 | -1873.26109513 | -0.2 | -4632.257007 | -1873.131596 | 8.6  | 8.8  | 17.1  |
| Figure 8_para-NMe2-styrene-Cu-OtBu_dimer_02  | -4632.85757242 | -1873.26182350 | -0.7 | -4632.256999 | -1873.131592 | 8.6  | 9.3  | 25.4  |
| Figure 8_L3a-Cu-OtBu                         | -4500.61984018 | -1873.26069914 | 0.0  | -4499.883173 | -1873.145276 | 0.0  | 0.0  | -20.3 |
| Figure 8_para-H-styrene-Cu-OtBu              | -2182.55158904 | -1873.22435371 | 22.8 | -2182.335076 | -1873.110126 | 22.1 | -0.8 | 27.4  |
| Figure 8_para-H-styrene-Cu-OtBu_dimer_01     | -4365.17726958 | -1873.26139946 | -0.4 | -4364.713565 | -1873.131833 | 8.4  | 8.9  | 25.6  |
| Figure 8_para-H-styrene-Cu-OtBu_dimer_02     | -4365.17671872 | -1873.26112403 | -0.3 | -4364.713671 | -1873.131886 | 8.4  | 8.7  | 25.6  |
| Figure 8_L3a-Cu-OtBu                         | -4500.61984018 | -1873.26069914 | 0.0  | -4499.883173 | -1873.145276 | 0.0  | 0.0  | -20.3 |
| Figure 8_para-CO2Me-styrene-Cu-OtBu          | -2410.19525632 | -1873.22279030 | 23.8 | -2409.941084 | -1873.108109 | 23.3 | -0.5 | 22.9  |
| Figure 8_para-CO2Me-styrene-Cu-OtBu_dimer_01 | -4820.46849056 | -1873.26177926 | -0.7 | -4819.932581 | -1873.133316 | 7.5  | 8.2  | 9.9   |
| Figure 8_para-CO2Me-styrene-Cu-OtBu_dimer_02 | -4820.47029487 | -1873.26268142 | -1.2 | -4819.930546 | -1873.132298 | 8.1  | 9.4  | 18.8  |

## Figure 9

|                                                                           |                |                |       |              |              |       |      |      |
|---------------------------------------------------------------------------|----------------|----------------|-------|--------------|--------------|-------|------|------|
| Figure 9_Cu-(OtBu) <sub>2</sub> _anion                                    | -2106.15712863 | -2106.15712863 | 0.0   | -2105.951624 | -2105.951624 | 0.0   | 0.0  | 16.1 |
| Figure 9_para-NMe <sub>2</sub> -styrene-Cu-(OtBu) <sub>2</sub> _anion_01  | -2549.33388221 | -2106.16691950 | -6.1  | -2548.933046 | -2105.936138 | 9.7   | 15.9 | 17.2 |
| Figure 9_para-NMe <sub>2</sub> -styrene-Cu-(OtBu) <sub>2</sub> _anion_02  | -2549.33285744 | -2106.16589473 | -5.5  | -2548.930012 | -2105.933104 | 11.6  | 17.1 | 28.2 |
| Figure 9_Cu-(OtBu) <sub>2</sub> _anion                                    | -2106.15712863 | -2106.15712863 | 0.0   | -2105.951624 | -2105.951624 | 0.0   | 0.0  | 16.1 |
| Figure 9_para-H-styrene-Cu-(OtBu) <sub>2</sub> _anion_01                  | -2415.49693836 | -2106.16970303 | -7.9  | -2415.162831 | -2105.937881 | 8.6   | 16.5 | 30.6 |
| Figure 9_para-H-styrene-Cu-(OtBu) <sub>2</sub> _anion_02                  | -2415.49618477 | -2106.16894944 | -7.4  | -2415.161886 | -2105.936936 | 9.2   | 16.6 | 24.4 |
| Figure 9_Cu-(OtBu) <sub>2</sub> _anion                                    | -2106.15712863 | -2106.15712863 | 0.0   | -2105.951624 | -2105.951624 | 0.0   | 0.0  | 16.1 |
| Figure 9_para-CO <sub>2</sub> Me-styrene-Cu-(OtBu) <sub>2</sub> _anion_01 | -2643.14335830 | -2106.17089228 | -8.6  | -2642.774259 | -2105.941284 | 6.5   | 15.1 | 9.0  |
| Figure 9_para-CO <sub>2</sub> Me-styrene-Cu-(OtBu) <sub>2</sub> _anion_02 | -2643.14401653 | -2106.17155051 | -9.0  | -2642.770739 | -2105.937764 | 8.7   | 17.7 | -0.9 |
| Figure 9_Cu-(OtBu) <sub>2</sub> _Na                                       | -2268.34902130 | -2268.34902130 | 0.0   | -2268.144864 | -2268.144864 | 0.0   | 0.0  | 24.5 |
| Figure 9_para-NMe <sub>2</sub> -styrene-Cu-(OtBu) <sub>2</sub> _Na_01     | -2711.56379480 | -2268.39683209 | -30.0 | -2711.161060 | -2268.164152 | -12.1 | 17.9 | 26.0 |
| Figure 9_para-NMe <sub>2</sub> -styrene-Cu-(OtBu) <sub>2</sub> _Na_02     | -2711.56379480 | -2268.39683209 | -30.0 | -2711.161060 | -2268.164152 | -12.1 | 17.9 | 26.0 |
| Figure 9_Cu-(OtBu) <sub>2</sub> _Na                                       | -2268.34902130 | -2268.34902130 | 0.0   | -2268.144864 | -2268.144864 | 0.0   | 0.0  | 24.5 |
| Figure 9_para-H-styrene-Cu-(OtBu) <sub>2</sub> _Na_01                     | -2577.72481829 | -2268.39758296 | -30.5 | -2577.391693 | -2268.166743 | -13.7 | 16.7 | 26.2 |
| Figure 9_para-H-styrene-Cu-(OtBu) <sub>2</sub> _Na_02                     | -2577.72480787 | -2268.39757254 | -30.5 | -2577.391579 | -2268.166629 | -13.7 | 16.8 | 31.4 |
| Figure 9_Cu-(OtBu) <sub>2</sub> _Na                                       | -2268.34902130 | -2268.34902130 | 0.0   | -2268.144864 | -2268.144864 | 0.0   | 0.0  | 24.5 |
| Figure 9_para-CO <sub>2</sub> Me-styrene-Cu-(OtBu) <sub>2</sub> _Na_01    | -2805.37090024 | -2268.39843422 | -31.0 | -2804.997907 | -2268.164932 | -12.6 | 18.4 | 24.1 |
| Figure 9_para-CO <sub>2</sub> Me-styrene-Cu-(OtBu) <sub>2</sub> _Na_02    | -2805.37090023 | -2268.39843421 | -31.0 | -2804.997906 | -2268.164931 | -12.6 | 18.4 | 24.1 |

## Figure 10

|                                             |                |                |      |              |              |      |      |        |
|---------------------------------------------|----------------|----------------|------|--------------|--------------|------|------|--------|
| Figure 10_NaOtBu-Cu-Me                      | -2075.35042459 | -2914.16234337 | 0.0  | -2075.229306 | -2913.912419 | 0.0  | 0.0  | -32.5  |
| Figure 10_NaOtBu-Cu-Me_(145 deg)            | -2075.34278322 | -2914.15470200 | 4.8  | -2075.222774 | -2913.905887 | 4.1  | -0.7 | -11.4  |
| Figure 10_NaOtBu-Cu-Me_(130 deg)            | -2075.33621269 | -2914.14813147 | 8.9  | -2075.216580 | -2913.899693 | 8.0  | -0.9 | 39.9   |
| Figure 10_NaOtBu-Cu-Me_(115 deg)            | -2075.32884553 | -2914.14076431 | 13.5 | -2075.208226 | -2913.891339 | 13.2 | -0.3 | -9.4   |
| Figure 10_NaOtBu_ts(SN2')_01                | -2914.15039392 | -2914.15039392 | 7.5  | -2913.876811 | -2913.876811 | 22.3 | 14.8 | -228.7 |
| Figure 10_NaOtBu_ts(SN2')_02                | -2914.15050466 | -2914.15050466 | 7.4  | -2913.876794 | -2913.876794 | 22.4 | 14.9 | -245.6 |
| Figure 10_NaOtBu_ts(SN2')_03                | -2914.14886171 | -2914.14886171 | 8.5  | -2913.876399 | -2913.876399 | 22.6 | 14.1 | -234.2 |
| Figure 10_NaOtBu_ts(SN2')_04                | -2914.14810523 | -2914.14810523 | 8.9  | -2913.874279 | -2913.874279 | 23.9 | 15.0 | -261.8 |
| Figure 10_NaOtBu_ts(SN2)_01                 | -2914.14526307 | -2914.14526307 | 10.7 | -2913.873417 | -2913.873417 | 24.5 | 13.8 | -335.1 |
| Figure 10_NaOtBu_ts(SN2)_02                 | -2914.14552014 | -2914.14552014 | 10.6 | -2913.872693 | -2913.872693 | 24.9 | 14.4 | -358.8 |
| Figure 10_NaOtBu_ts(SN2)_03                 | -2914.14400540 | -2914.14400540 | 11.5 | -2913.872211 | -2913.872211 | 25.2 | 13.7 | -344.8 |
| Figure 10_NaOtBu_ts(SN2)_04                 | -2914.14390216 | -2914.14390216 | 11.6 | -2913.869510 | -2913.869510 | 26.9 | 15.4 | -336.7 |
| Figure 10_NaOtBu_ts(SN2')_chelate_01        | -2914.16942813 | -2914.16942813 | -4.4 | -2913.895677 | -2913.895677 | 10.5 | 15.0 | -377.0 |
| Figure 10_NaOtBu_ts(SN2')_chelate_02        | -2914.16958209 | -2914.16958209 | -4.5 | -2913.895571 | -2913.895571 | 10.6 | 15.1 | -387.0 |
| Figure 10_NaOtBu_ts(SN2')_chelate_03        | -2914.17005408 | -2914.17005408 | -4.8 | -2913.894634 | -2913.894634 | 11.2 | 16.0 | -394.1 |
| Figure 10_NaOtBu_ts(SN2')_chelate_04        | -2914.17005409 | -2914.17005409 | -4.8 | -2913.894634 | -2913.894634 | 11.2 | 16.0 | -394.1 |
| Figure 10_NaOtBu_ts(SN2')_chelate_05        | -2914.16875021 | -2914.16875021 | -4.0 | -2913.892367 | -2913.892367 | 12.6 | 16.6 | -369.0 |
| Figure 10_NaOtBu_ts(SN2')_chelate_06        | -2914.16875021 | -2914.16875021 | -4.0 | -2913.892367 | -2913.892367 | 12.6 | 16.6 | -369.0 |
| Figure 10_NaOtBu_ts(SN2)_chelate_01         | -2914.16222070 | -2914.16222070 | 0.1  | -2913.895018 | -2913.895018 | 10.9 | 10.8 | -483.3 |
| Figure 10_NaOtBu_ts(SN2)_chelate_02         | -2914.16232564 | -2914.16232564 | 0.0  | -2913.892317 | -2913.892317 | 12.6 | 12.6 | -494.8 |
| Figure 10_NaOtBu_ts(SN2)_chelate_03         | -2914.16068298 | -2914.16068298 | 1.0  | -2913.891867 | -2913.891867 | 12.9 | 11.9 | -481.8 |
| Figure 10_NaOtBu_ts(SN2)_chelate_04         | -2914.16231279 | -2914.16231279 | 0.0  | -2913.891111 | -2913.891111 | 13.4 | 13.4 | -469.1 |
| Figure 10_NaOtBu_ts(SN2)_chelate_05         | -2914.16125846 | -2914.16125846 | 0.7  | -2913.890253 | -2913.890253 | 13.9 | 13.2 | -469.6 |
| Figure 10_NaOtBu_ts(SN2)_chelate_06         | -2914.16058712 | -2914.16058712 | 1.1  | -2913.889265 | -2913.889265 | 14.5 | 13.4 | -465.6 |
| Figure 10_PMe <sub>3</sub> -Cu-Me           | -2141.10632939 | -2979.91824817 | 0.0  | -2140.996008 | -2979.679121 | 0.0  | 0.0  | 48.2   |
| Figure 10_PMe <sub>3</sub> -Cu-Me_(145 deg) | -2141.09872349 | -2979.91064227 | 4.8  | -2140.986760 | -2979.669873 | 5.8  | 1.0  | 70.7   |
| Figure 10_PMe <sub>3</sub> -Cu-Me_(130 deg) | -2141.09184945 | -2979.90376823 | 9.1  | -2140.978995 | -2979.662108 | 10.7 | 1.6  | 64.3   |

|                                  |                |                |      |              |              |      |      |        |
|----------------------------------|----------------|----------------|------|--------------|--------------|------|------|--------|
| Figure 10_PMe3-Cu-Me_(115 deg)   | -2141.08375606 | -2979.89567484 | 14.2 | -2140.971734 | -2979.654847 | 15.2 | 1.1  | 53.8   |
| Figure 10_PMe3_ts(SN2')_01       | -2979.90366207 | -2979.90366207 | 9.2  | -2979.640377 | -2979.640377 | 24.3 | 15.2 | -311.5 |
| Figure 10_PMe3_ts(SN2')_02       | -2979.90320903 | -2979.90320903 | 9.4  | -2979.639845 | -2979.639845 | 24.6 | 15.2 | -287.9 |
| Figure 10_PMe3_ts(SN2')_03       | -2979.90323285 | -2979.90323285 | 9.4  | -2979.637616 | -2979.637616 | 26.0 | 16.6 | -289.3 |
| Figure 10_PMe3_ts(SN2')_04       | -2979.90323285 | -2979.90323285 | 9.4  | -2979.637616 | -2979.637616 | 26.0 | 16.6 | -289.3 |
| Figure 10_PMe3_ts(SN2)_01        | -2979.90175960 | -2979.90175960 | 10.3 | -2979.638284 | -2979.638284 | 25.6 | 15.3 | -328.9 |
| Figure 10_PMe3_ts(SN2)_02        | -2979.90254477 | -2979.90254477 | 9.9  | -2979.638179 | -2979.638179 | 25.7 | 15.8 | -358.4 |
| Figure 10_PMe3_ts(SN2)_03        | -2979.90254477 | -2979.90254477 | 9.9  | -2979.638178 | -2979.638178 | 25.7 | 15.8 | -358.4 |
| Figure 10_PMe3_ts(SN2)_04        | -2979.90029845 | -2979.90029845 | 11.3 | -2979.636977 | -2979.636977 | 26.4 | 15.2 | -334.5 |
| Figure 10_NHcMe2-Cu-Me           | -1985.96094373 | -2824.77286251 | 0.0  | -1985.814079 | -2824.497192 | 0.0  | 0.0  | 47.1   |
| Figure 10_NHcMe2-Cu-Me_(145 deg) | -1985.95101987 | -2824.76293865 | 6.2  | -1985.802010 | -2824.485123 | 7.6  | 1.3  | 65.1   |
| Figure 10_NHcMe2-Cu-Me_(130 deg) | -1985.94203020 | -2824.75394898 | 11.9 | -1985.794273 | -2824.477386 | 12.4 | 0.6  | 66.0   |
| Figure 10_NHcMe2-Cu-Me_(115 deg) | -1985.93143678 | -2824.74335556 | 18.5 | -1985.784721 | -2824.467834 | 18.4 | -0.1 | 49.3   |
| Figure 10_NHcMe2_ts(SN2')_01     | -2824.75801259 | -2824.75801259 | 9.3  | -2824.460014 | -2824.460014 | 23.3 | 14.0 | -332.6 |
| Figure 10_NHcMe2_ts(SN2')_02     | -2824.75692951 | -2824.75692951 | 10.0 | -2824.458601 | -2824.458601 | 24.2 | 14.2 | -329.6 |
| Figure 10_NHcMe2_ts(SN2')_03     | -2824.75750602 | -2824.75750602 | 9.6  | -2824.457526 | -2824.457526 | 24.9 | 15.3 | -318.4 |
| Figure 10_NHcMe2_ts(SN2')_04     | -2824.75669355 | -2824.75669355 | 10.1 | -2824.456634 | -2824.456634 | 25.5 | 15.3 | -334.2 |
| Figure 10_NHcMe2_ts(SN2)_01      | -2824.75588695 | -2824.75588695 | 10.7 | -2824.455687 | -2824.455687 | 26.0 | 15.4 | -385.6 |
| Figure 10_NHcMe2_ts(SN2)_02      | -2824.75588696 | -2824.75588696 | 10.7 | -2824.455684 | -2824.455684 | 26.0 | 15.4 | -385.6 |
| Figure 10_NHcMe2_ts(SN2)_03      | -2824.75502346 | -2824.75502346 | 11.2 | -2824.455686 | -2824.455686 | 26.0 | 14.9 | -384.8 |
| Figure 10_NHcMe2_ts(SN2)_04      | -2824.75341246 | -2824.75341246 | 12.2 | -2824.453336 | -2824.453336 | 27.5 | 15.3 | -372.6 |

E ..... electronic energy in hartree with  $\omega$ B97XD/Def2SVP in THF(SMD)

E(sum).. sum of electronic energies in hartree with  $\omega$ B97XD/Def2SVP in THF(SMD) after mass balance

$\Delta E$  ..... relative electronic energy in kcal/mol with  $\omega$ B97XD/Def2SVP in THF(SMD)

G ..... electronic and thermal free energy with  $\omega$ B97XD/Def2SVP in THF(SMD)

G(sum).. sum of electronic and thermal free energies with  $\omega$ B97XD/Def2SVP in THF(SMD) after mass balance

$\Delta G$  ..... relative free energy in kcal/mol with  $\omega$ B97XD/Def2SVP in THF(SMD)

$\Delta G_{\text{corr}}$  ... thermal correction to free energy in kcal/mol obtained with  $\omega$ B97XD/Def2SVP in THF(SMD) ( $\Delta G = \Delta E + \Delta G_{\text{corr}}$ )

Freq ..... lowest frequency



















|                |                |      |      |                |                |      |      |                |                |      |      |
|----------------|----------------|------|------|----------------|----------------|------|------|----------------|----------------|------|------|
| -2915.49758377 | -2915.49758377 | 5.6  | 16.5 | -2915.15259834 | -2915.15259834 | 4.0  | 14.8 | -2914.74668142 | -2914.74668142 | 3.8  | 14.6 |
| -2915.49743197 | -2915.49743197 | 5.7  | 18.3 | -2915.15253173 | -2915.15253173 | 4.0  | 16.6 | -2914.74679282 | -2914.74679282 | 3.7  | 16.3 |
| -2915.49621977 | -2915.49621977 | 6.5  | 18.3 | -2915.15107993 | -2915.15107993 | 4.9  | 16.8 | -2914.74545156 | -2914.74545156 | 4.5  | 16.4 |
| -2915.49770861 | -2915.49770861 | 5.5  | 18.9 | -2915.15266414 | -2915.15266414 | 3.9  | 17.3 | -2914.74537387 | -2914.74537387 | 4.6  | 17.9 |
| -2915.49699588 | -2915.49699588 | 6.0  | 19.2 | -2915.15189705 | -2915.15189705 | 4.4  | 17.7 | -2914.74516804 | -2914.74516804 | 4.7  | 17.9 |
| -2915.49627893 | -2915.49627893 | 6.4  | 19.9 | -2915.15082137 | -2915.15082137 | 5.1  | 18.5 | -2914.74373759 | -2914.74373759 | 5.6  | 19.0 |
| -2141.65269802 | -2981.20386649 | 0.0  | 0.0  | -2141.45816208 | -2980.86423292 | 0.0  | 0.0  | -2141.19963466 | -2980.48265619 | 0.0  | 0.0  |
| -2141.64537736 | -2981.19654583 | 4.6  | 5.6  | -2141.45064242 | -2980.85671326 | 4.7  | 5.7  | -2141.19296088 | -2980.47598241 | 4.2  | 5.2  |
| -2141.63872531 | -2981.18989378 | 8.8  | 10.4 | -2141.44389024 | -2980.84996108 | 9.0  | 10.5 | -2141.18687164 | -2980.46989317 | 8.0  | 9.6  |
| -2141.63101767 | -2981.18218614 | 13.6 | 14.7 | -2141.43669753 | -2980.84276837 | 13.5 | 14.5 | -2141.18029773 | -2980.46331926 | 12.1 | 13.2 |
| -2981.18697803 | -2981.18697803 | 10.6 | 25.8 | -2980.84896107 | -2980.84896107 | 9.6  | 24.7 | -2980.46767442 | -2980.46767442 | 9.4  | 24.6 |
| -2981.18540881 | -2981.18540881 | 11.6 | 26.8 | -2980.84781710 | -2980.84781710 | 10.3 | 25.5 | -2980.46735368 | -2980.46735368 | 9.6  | 24.8 |
| -2981.18577873 | -2981.18577873 | 11.4 | 28.0 | -2980.84795420 | -2980.84795420 | 10.2 | 26.8 | -2980.46753052 | -2980.46753052 | 9.5  | 26.1 |
| -2981.18577867 | -2981.18577867 | 11.4 | 28.0 | -2980.84795413 | -2980.84795413 | 10.2 | 26.8 | -2980.46753046 | -2980.46753046 | 9.5  | 26.1 |
| -2981.18452758 | -2981.18452758 | 12.1 | 27.4 | -2980.84693685 | -2980.84693685 | 10.9 | 26.1 | -2980.46707835 | -2980.46707835 | 9.8  | 25.1 |
| -2981.18498651 | -2981.18498651 | 11.8 | 27.7 | -2980.84777627 | -2980.84777627 | 10.3 | 26.2 | -2980.46770767 | -2980.46770767 | 9.4  | 25.2 |
| -2981.18498655 | -2981.18498655 | 11.8 | 27.7 | -2980.84777627 | -2980.84777627 | 10.3 | 26.2 | -2980.46770771 | -2980.46770771 | 9.4  | 25.2 |
| -2981.18237254 | -2981.18237254 | 13.5 | 28.7 | -2980.84473125 | -2980.84473125 | 12.2 | 27.4 | -2980.46460061 | -2980.46460061 | 11.3 | 26.5 |
| -1986.57814044 | -2826.12930891 | 0.0  | 0.0  | -1986.33955582 | -2825.74562666 | 0.0  | 0.0  | -1986.08883022 | -2825.37185175 | 0.0  | 0.0  |
| -1986.56895352 | -2826.12012199 | 5.8  | 7.1  | -1986.33000606 | -2825.73607690 | 6.0  | 7.3  | -1986.07998002 | -2825.36300155 | 5.6  | 6.9  |
| -1986.56053382 | -2826.11170229 | 11.0 | 11.6 | -1986.32094249 | -2825.72701333 | 11.7 | 12.2 | -1986.07183061 | -2825.35485214 | 10.7 | 11.2 |
| -1986.55046689 | -2826.10163536 | 17.4 | 17.3 | -1986.31078417 | -2825.71685501 | 18.1 | 18.0 | -1986.06267282 | -2825.34569435 | 16.4 | 16.3 |
| -2826.11208469 | -2826.11208469 | 10.8 | 24.8 | -2825.72859180 | -2825.72859180 | 10.7 | 24.7 | -2825.35659278 | -2825.35659278 | 9.6  | 23.6 |
| -2826.11104038 | -2826.11104038 | 11.5 | 25.7 | -2825.72734835 | -2825.72734835 | 11.5 | 25.7 | -2825.35559374 | -2825.35559374 | 10.2 | 24.4 |
| -2826.11241313 | -2826.11241313 | 10.6 | 25.9 | -2825.72896742 | -2825.72896742 | 10.5 | 25.7 | -2825.35609097 | -2825.35609097 | 9.9  | 25.1 |
| -2826.11123022 | -2826.11123022 | 11.3 | 26.6 | -2825.72776919 | -2825.72776919 | 11.2 | 26.5 | -2825.35603124 | -2825.35603124 | 9.9  | 25.2 |
| -2826.10978056 | -2826.10978056 | 12.3 | 27.6 | -2825.72677023 | -2825.72677023 | 11.8 | 27.2 | -2825.35499642 | -2825.35499642 | 10.6 | 26.0 |
| -2826.10978071 | -2826.10978071 | 12.3 | 27.6 | -2825.72677046 | -2825.72677046 | 11.8 | 27.2 | -2825.35499658 | -2825.35499658 | 10.6 | 26.0 |
| -2826.10819802 | -2826.10819802 | 13.2 | 28.1 | -2825.72478699 | -2825.72478699 | 13.1 | 27.9 | -2825.35353093 | -2825.35353093 | 11.5 | 26.3 |
| -2826.10632792 | -2826.10632792 | 14.4 | 29.7 | -2825.72283806 | -2825.72283806 | 14.3 | 29.6 | -2825.35124742 | -2825.35124742 | 12.9 | 28.2 |

$E_{sp}$  ..... single point electronic energy in thf (SMD) in hartree with Def2TZVPP

$E_{sp}$  (sum) single point electronic energy in thf (SMD) in hartree with Def2TZVPP after mass balance

$\Delta E_{sp}$  ... relative single point electronic energy in thf(SMD) in kcal/mol with Def2TZVPP

$\Delta G_{sp}$  ... relative single point free energy in thf(SMD) in kcal/mol ( $\Delta G_{sp} = \Delta E_{sp}/\text{Def2TZVPP} + \Delta G_{\text{con}}[\text{level of optimization}]$ )

## Single point energies in Figures 1–10 with MN12L and M06L

| MN12L/Def2TZVPP thf(SMD) |                             |                               |                               | M06L/Def2TZVPP thf(SMD) |                             |                               |                               |
|--------------------------|-----------------------------|-------------------------------|-------------------------------|-------------------------|-----------------------------|-------------------------------|-------------------------------|
| $E_{sp}$<br>[hartree]    | $E_{sp}$ (sum)<br>[hartree] | $\Delta E_{sp}$<br>[kcal/mol] | $\Delta G_{sp}$<br>[kcal/mol] | $E_{sp}$<br>[hartree]   | $E_{sp}$ (sum)<br>[hartree] | $\Delta E_{sp}$<br>[kcal/mol] | $\Delta G_{sp}$<br>[kcal/mol] |
| -822.04607631            |                             |                               |                               | -822.75545796           |                             |                               |                               |
| -643.98578532            |                             |                               |                               | -644.57034955           |                             |                               |                               |
| -395.19783002            |                             |                               |                               | -395.45310892           |                             |                               |                               |
| -2628.23171756           |                             |                               |                               | -2629.63211447          |                             |                               |                               |
| -305.79116114            |                             |                               |                               | -306.08269389           |                             |                               |                               |
| -460.94909718            |                             |                               |                               | -461.13567381           |                             |                               |                               |
| -232.28527940            |                             |                               |                               | -232.50842306           |                             |                               |                               |
| -443.32250906            |                             |                               |                               | -443.72359397           |                             |                               |                               |
| -309.45547799            |                             |                               |                               | -309.72019656           |                             |                               |                               |
| -537.23585868            |                             |                               |                               | -537.66849954           |                             |                               |                               |
| -839.18651749            |                             |                               |                               | -839.62646710           |                             |                               |                               |
| -2101.65341983           |                             |                               |                               | -2102.24570645          |                             |                               |                               |
| -1946.51000347           |                             |                               |                               | -1947.20767662          |                             |                               |                               |
| -2084.01167846           |                             |                               |                               | -2084.82069541          |                             |                               |                               |
| -1950.14284503           |                             |                               |                               | -1950.81515487          |                             |                               |                               |
| -2177.92257168           |                             |                               |                               | -2178.76324286          |                             |                               |                               |
| <b>Figure 1</b>          |                             |                               |                               |                         |                             |                               |                               |
| -4501.28636762           | -2360.57041905              | 26.0                          | 24.8                          | -4503.31808352          | -2361.59127402              | 18.2                          | 17.0                          |
| -5323.34098806           | -2360.57896318              | 20.7                          | 42.6                          | -5326.07741129          | -2361.59514383              | 15.8                          | 37.7                          |
| -5323.34996829           | -2360.58794341              | 15.0                          | 35.6                          | -5326.07953936          | -2361.59727190              | 14.4                          | 35.0                          |
| -5323.33569668           | -2360.57367180              | 24.0                          | 42.1                          | -5326.07193576          | -2361.58966830              | 19.2                          | 37.3                          |
| -5323.34444374           | -2360.58241886              | 18.5                          | 40.4                          | -5326.07616090          | -2361.59389344              | 16.6                          | 38.4                          |
| -5323.38475313           | -2360.62272825              | -6.8                          | 9.9                           | -5326.11380739          | -2361.63153993              | -7.1                          | 9.6                           |
| -4679.38816199           | -2360.61192242              | 0.0                           | 0.0                           | -4681.53220507          | -2361.62028716              | 0.0                           | 0.0                           |
| -4679.38689947           | -2360.61065990              | 0.8                           | 2.1                           | -4681.53133506          | -2361.61941715              | 0.5                           | 1.8                           |
| -4679.37981569           | -2360.60357612              | 5.2                           | 3.1                           | -4681.52699502          | -2361.61507711              | 3.3                           | 1.2                           |
| -4679.37890877           | -2360.60266920              | 5.8                           | 5.0                           | -4681.52543652          | -2361.61351861              | 4.2                           | 3.5                           |
| -4679.38299196           | -2360.60675239              | 3.2                           | 4.3                           | -4681.52821068          | -2361.61629277              | 2.5                           | 3.6                           |
| -4679.38051466           | -2360.60427509              | 4.8                           | 5.1                           | -4681.52777463          | -2361.61585672              | 2.8                           | 3.1                           |
| -4679.37765467           | -2360.60141510              | 6.6                           | 6.0                           | -4681.52379342          | -2361.61187551              | 5.3                           | 4.6                           |
| -4679.37791686           | -2360.60167729              | 6.4                           | 7.6                           | -4681.52474041          | -2361.61282250              | 4.7                           | 5.8                           |
| -4679.37839074           | -2360.60215117              | 6.1                           | 7.5                           | -4681.52613391          | -2361.61421600              | 3.8                           | 5.2                           |
| -4988.85796259           | -2360.62624503              | -9.0                          | 10.3                          | -4991.26394184          | -2361.63182737              | -7.2                          | 12.0                          |
| -4988.85640998           | -2360.62469242              | -8.0                          | 10.5                          | -4991.26099070          | -2361.62887623              | -5.4                          | 13.1                          |
| -4988.85640960           | -2360.62469204              | -8.0                          | 10.5                          | -4991.26099193          | -2361.62887746              | -5.4                          | 13.1                          |
| -4988.85465094           | -2360.62293338              | -6.9                          | 10.9                          | -4991.25908183          | -2361.62696736              | -4.2                          | 13.6                          |
| -4988.85421704           | -2360.62249948              | -6.6                          | 12.8                          | -4991.25817285          | -2361.62605838              | -3.6                          | 15.8                          |
| -4988.85421650           | -2360.62249894              | -6.6                          | 12.8                          | -4991.25817216          | -2361.62605769              | -3.6                          | 15.8                          |
| -4988.84972826           | -2360.61801070              | -3.8                          | 15.3                          | -4991.25601019          | -2361.62389572              | -2.3                          | 16.8                          |
| -4988.84972815           | -2360.61801059              | -3.8                          | 15.3                          | -4991.25601013          | -2361.62389566              | -2.3                          | 16.8                          |
| -4988.84884346           | -2360.61712590              | -3.3                          | 17.2                          | -4991.25158736          | -2361.61947289              | 0.5                           | 20.9                          |
| -4988.89252289           | -2360.66080533              | -30.7                         | -12.7                         | -4991.29942301          | -2361.66730854              | -29.5                         | -11.5                         |
| -4988.89204016           | -2360.66032260              | -30.4                         | -11.8                         | -4991.29931015          | -2361.66719568              | -29.4                         | -10.9                         |
| -4988.88948445           | -2360.65776689              | -28.8                         | -8.6                          | -4991.29924045          | -2361.66712598              | -29.4                         | -9.2                          |
| -4988.84745639           | -2360.61573883              | -2.4                          | 14.6                          | -4991.25358081          | -2361.62146634              | -0.7                          | 16.3                          |
| -4988.84744680           | -2360.61572924              | -2.4                          | 15.4                          | -4991.25355576          | -2361.62144129              | -0.7                          | 17.0                          |
| -4988.85201242           | -2360.62029486              | -5.3                          | 15.7                          | -4991.25581983          | -2361.62370536              | -2.1                          | 18.8                          |



|                |                |       |       |                |                |       |       |
|----------------|----------------|-------|-------|----------------|----------------|-------|-------|
| -4988.85122013 | -2360.61950257 | -4.8  | 14.6  | -4991.25140935 | -2361.61929488 | 0.6   | 19.9  |
| -4988.84893142 | -2360.61721386 | -3.3  | 17.2  | -4991.25181670 | -2361.61970223 | 0.4   | 20.9  |
| -4988.84893120 | -2360.61721364 | -3.3  | 17.2  | -4991.25181662 | -2361.61970215 | 0.4   | 20.9  |
| -4988.84893115 | -2360.61721359 | -3.3  | 17.2  | -4991.25181661 | -2361.61970214 | 0.4   | 20.9  |
| -4988.84171584 | -2360.60999828 | 1.2   | 20.3  | -4991.24893907 | -2361.61682460 | 2.2   | 21.3  |
| -4988.85078797 | -2360.61907041 | -4.5  | 17.0  | -4991.25136200 | -2361.61924753 | 0.7   | 22.2  |
| -4988.83995646 | -2360.60823890 | 2.3   | 22.5  | -4991.24602377 | -2361.61390930 | 4.0   | 24.2  |
| -4988.82888840 | -2360.59717084 | 9.3   | 28.7  | -4991.23932875 | -2361.60721428 | 8.2   | 27.6  |
| -4988.89883787 | -2360.66712031 | -34.6 | -16.0 | -4991.30403699 | -2361.67192252 | -32.4 | -13.7 |
| -4988.89053079 | -2360.65881323 | -29.4 | -9.1  | -4991.29577067 | -2361.66365620 | -27.2 | -6.9  |
| -4988.84988219 | -2360.61816463 | -3.9  | 12.5  | -4991.25851367 | -2361.62639920 | -3.8  | 12.5  |
| -4988.84839884 | -2360.61668128 | -3.0  | 14.3  | -4991.25794845 | -2361.62583398 | -3.5  | 13.8  |
| -4988.85710959 | -2360.62539203 | -8.5  | 11.3  | -4991.26246346 | -2361.63034899 | -6.3  | 13.5  |
| -4988.85565429 | -2360.62393673 | -7.5  | 11.2  | -4991.26088577 | -2361.62877130 | -5.3  | 13.4  |
| -4988.85194662 | -2360.62022906 | -5.2  | 14.0  | -4991.25472840 | -2361.62261393 | -1.5  | 17.7  |
| -4988.84765355 | -2360.61593599 | -2.5  | 15.7  | -4991.25552841 | -2361.62341394 | -2.0  | 16.3  |
| -4988.84756235 | -2360.61584479 | -2.5  | 15.7  | -4991.25397400 | -2361.62185953 | -1.0  | 17.2  |
| -4988.84672813 | -2360.61501057 | -1.9  | 17.0  | -4991.25304728 | -2361.62093281 | -0.4  | 18.5  |
| -4988.85031611 | -2360.61859855 | -4.2  | 16.1  | -4991.25538090 | -2361.62326643 | -1.9  | 18.4  |
| -4988.85031606 | -2360.61859850 | -4.2  | 16.1  | -4991.25538084 | -2361.62326637 | -1.9  | 18.4  |
| -4988.84730053 | -2360.61558297 | -2.3  | 17.4  | -4991.25088060 | -2361.61876613 | 1.0   | 20.6  |
| -4988.84931666 | -2360.61759910 | -3.6  | 17.5  | -4991.25151932 | -2361.61940485 | 0.6   | 21.6  |
| -4988.84650189 | -2360.61478433 | -1.8  | 19.6  | -4991.25057160 | -2361.61845713 | 1.1   | 22.5  |
| -4988.89941353 | -2360.66769597 | -35.0 | -17.3 | -4991.30473639 | -2361.67262192 | -32.8 | -15.2 |
| -4988.88473808 | -2360.65302052 | -25.8 | -9.0  | -4991.29619501 | -2361.66408054 | -27.5 | -10.7 |
| -4988.89024863 | -2360.65853107 | -29.2 | -10.2 | -4991.29721136 | -2361.66509689 | -28.1 | -9.1  |
| -4988.88750185 | -2360.65578429 | -27.5 | -8.4  | -4991.29514275 | -2361.66302828 | -26.8 | -7.7  |
| -4988.88096605 | -2360.64924849 | -23.4 | -1.9  | -4991.28929904 | -2361.65718457 | -23.2 | -1.6  |
| -4988.85724806 | -2360.62553050 | -8.5  | 7.0   | -4991.26579956 | -2361.63368509 | -8.4  | 7.1   |
| -4988.84849552 | -2360.61677796 | -3.0  | 13.8  | -4991.25431121 | -2361.62219674 | -1.2  | 15.7  |
| -4988.85092131 | -2360.61920375 | -4.6  | 14.2  | -4991.25450762 | -2361.62239315 | -1.3  | 17.5  |
| -4988.83922038 | -2360.60750282 | 2.8   | 20.3  | -4991.24722592 | -2361.61511145 | 3.2   | 20.8  |
| -4988.84861621 | -2360.61689865 | -3.1  | 15.6  | -4991.25142667 | -2361.61931220 | 0.6   | 19.3  |
| -4988.85095232 | -2360.61923476 | -4.6  | 16.1  | -4991.25362567 | -2361.62151120 | -0.8  | 19.9  |
| -4988.85117418 | -2360.61945662 | -4.7  | 16.0  | -4991.25350469 | -2361.62139022 | -0.7  | 20.0  |
| -4988.84429569 | -2360.61257813 | -0.4  | 19.9  | -4991.24913990 | -2361.61702543 | 2.0   | 22.4  |
| -4988.84898617 | -2360.61726861 | -3.4  | 18.6  | -4991.25163100 | -2361.61951653 | 0.5   | 22.5  |
| -4988.83475407 | -2360.60303651 | 5.6   | 25.5  | -4991.23997512 | -2361.60786065 | 7.8   | 27.7  |
| -4988.88907097 | -2360.65735341 | -28.5 | -9.1  | -4991.29712588 | -2361.66501141 | -28.1 | -8.6  |
| -4988.88873731 | -2360.65701975 | -28.3 | -8.0  | -4991.29782361 | -2361.66570914 | -28.5 | -8.2  |
| -4988.88302940 | -2360.65131184 | -24.7 | -6.4  | -4991.29192643 | -2361.65981196 | -24.8 | -6.5  |
| -4988.88488031 | -2360.65316275 | -25.9 | -7.2  | -4991.29273887 | -2361.66062440 | -25.3 | -6.7  |
| -4988.89343366 | -2360.66171610 | -31.2 | -15.6 | -4991.30003169 | -2361.66791722 | -29.9 | -14.3 |
| -4988.89457434 | -2360.66285678 | -32.0 | -14.6 | -4991.30099393 | -2361.66887946 | -30.5 | -13.2 |
| -4988.88863184 | -2360.65691428 | -28.2 | -11.5 | -4991.29750798 | -2361.66539351 | -28.3 | -11.6 |
| -5828.09124695 | -2360.67301190 | -38.3 | -2.2  | -5830.93795352 | -2361.67937195 | -37.1 | -0.9  |
| -5828.08774704 | -2360.66951199 | -36.1 | 0.4   | -5830.93524803 | -2361.67666646 | -35.4 | 1.1   |
| -5828.08753594 | -2360.66930089 | -36.0 | -0.5  | -5830.93404836 | -2361.67546679 | -34.6 | 0.9   |
| -5828.08287841 | -2360.66464336 | -33.1 | 5.0   | -5830.93194926 | -2361.67336769 | -33.3 | 4.8   |
| -5828.06800600 | -2360.64977095 | -23.8 | 11.4  | -5830.92172687 | -2361.66314530 | -26.9 | 8.3   |
| -5828.06513123 | -2360.64689618 | -21.9 | 13.2  | -5830.92029553 | -2361.66171396 | -26.0 | 9.1   |
| -5828.07308655 | -2360.65485150 | -26.9 | 7.9   | -5830.92432287 | -2361.66574130 | -28.5 | 6.3   |
| -5828.06526714 | -2360.64703209 | -22.0 | 14.9  | -5830.92049597 | -2361.66191440 | -26.1 | 10.8  |
| -5828.05303669 | -2360.63480164 | -14.4 | 21.1  | -5830.90838941 | -2361.64980784 | -18.5 | 16.9  |
| -5828.04656461 | -2360.62832956 | -10.3 | 25.9  | -5830.90508102 | -2361.64649945 | -16.4 | 19.8  |
| -5828.08581243 | -2360.66757738 | -34.9 | 2.4   | -5830.93879609 | -2361.68021452 | -37.6 | -0.2  |
| -5828.07946615 | -2360.66123110 | -30.9 | 3.5   | -5830.92803846 | -2361.66945689 | -30.9 | 3.6   |

|                 |                |       |       |                |                |       |       |
|-----------------|----------------|-------|-------|----------------|----------------|-------|-------|
| -5828.07273533  | -2360.65450028 | -26.7 | 10.0  | -5830.92763250 | -2361.66905093 | -30.6 | 6.1   |
| <b>Figure 2</b> |                |       |       |                |                |       |       |
| -4357.72683468  | -2360.58802518 | 15.0  | 21.1  | -4359.57953482 | -2361.61237849 | 5.0   | 11.1  |
| -2178.85030206  | -2360.57490990 | 23.2  | 21.0  | -2179.77731897 | -2361.59993005 | 12.8  | 10.6  |
| -3000.90779644  | -2360.58632797 | 16.1  | 31.0  | -3002.53929522 | -2361.60644834 | 8.7   | 23.6  |
| -3000.91212273  | -2360.59065426 | 13.3  | 27.0  | -3002.54097568 | -2361.60812880 | 7.6   | 21.3  |
| -3000.93893076  | -2360.61746229 | -3.5  | 10.6  | -3002.56473570 | -2361.63188882 | -7.3  | 6.8   |
| -2356.94231187  | -2360.60662872 | 3.3   | 2.8   | -2357.98375042 | -2361.62125308 | -0.6  | -1.1  |
| -2800.28316903  | -2360.62497682 | -8.2  | 6.2   | -2801.72091381 | -2361.63482251 | -9.1  | 5.3   |
| -2800.27137083  | -2360.61317862 | -0.8  | 14.1  | -2801.71011758 | -2361.62402628 | -2.3  | 12.6  |
| -2800.30916518  | -2360.65097297 | -24.5 | -8.7  | -2801.75010359 | -2361.66401229 | -27.4 | -11.7 |
| -2800.30729069  | -2360.64909848 | -23.3 | -6.3  | -2801.74744348 | -2361.66135218 | -25.8 | -8.7  |
| -2800.30756708  | -2360.64937487 | -23.5 | -6.7  | -2801.74790700 | -2361.66181570 | -26.1 | -9.3  |
| -2800.27517436  | -2360.61698215 | -3.2  | 10.3  | -2801.71214598 | -2361.62605468 | -3.6  | 9.8   |
| -2800.31578308  | -2360.65759087 | -28.7 | -14.8 | -2801.74926939 | -2361.66317809 | -26.9 | -13.0 |
| -2800.29604255  | -2360.63785034 | -16.3 | -1.9  | -2801.73195409 | -2361.64586279 | -16.0 | -1.7  |
| -2800.29262713  | -2360.63443492 | -14.1 | 0.6   | -2801.73167493 | -2361.64558363 | -15.9 | -1.1  |
| -2800.28452615  | -2360.62633394 | -9.0  | 4.7   | -2801.72741804 | -2361.64132674 | -13.2 | 0.6   |
| -2800.28616449  | -2360.62797228 | -10.1 | 3.4   | -2801.72982465 | -2361.64373335 | -14.7 | -1.3  |
| -2800.28137484  | -2360.62318263 | -7.1  | 7.5   | -2801.72551993 | -2361.63942863 | -12.0 | 2.5   |
| -2800.28553544  | -2360.62734323 | -9.7  | 4.3   | -2801.72995096 | -2361.64385966 | -14.8 | -0.8  |
| -853.78202880   | -2360.63384006 | -13.8 | -14.9 | -854.52473821  | -2361.64632353 | -16.3 | -17.5 |
| -2800.31005102  | -2360.65185881 | -25.1 | -10.8 | -2801.74694127 | -2361.66084997 | -25.5 | -11.2 |
| -2800.28764106  | -2360.62944885 | -11.0 | 3.5   | -2801.72064153 | -2361.63455023 | -9.0  | 5.5   |
| -2800.32002571  | -2360.66183350 | -31.3 | -14.0 | -2801.75891341 | -2361.67282211 | -33.0 | -15.6 |
| -3639.52420143  | -2360.67949173 | -42.4 | -7.0  | -3641.39967563 | -2361.68711723 | -41.9 | -6.5  |
| -3639.52323183  | -2360.67852213 | -41.8 | -8.2  | -3641.39911247 | -2361.68655407 | -41.6 | -8.0  |
| -3639.50825065  | -2360.66354095 | -32.4 | -1.3  | -3641.39098795 | -2361.67842955 | -36.5 | -5.4  |
| -3639.50840858  | -2360.66369888 | -32.5 | 0.7   | -3641.39055237 | -2361.67799397 | -36.2 | -3.0  |
| -3639.53146649  | -2360.68675679 | -47.0 | -11.1 | -3641.41306684 | -2361.70050844 | -50.3 | -14.5 |
| -3639.52425098  | -2360.67954128 | -42.4 | -8.2  | -3641.40953288 | -2361.69697448 | -48.1 | -13.9 |
| -4357.72683468  | -2360.58802518 | 15.0  | 21.1  | -4359.57953482 | -2361.61237849 | 5.0   | 11.1  |
| -2178.85030206  | -2360.57490990 | 23.2  | 21.0  | -2179.77731897 | -2361.59993005 | 12.8  | 10.6  |
| -3000.90779644  | -2360.58632797 | 16.1  | 31.0  | -3002.53929522 | -2361.60644834 | 8.7   | 23.6  |
| -3000.91212273  | -2360.59065426 | 13.3  | 27.0  | -3002.54097568 | -2361.60812880 | 7.6   | 21.3  |
| -3000.93893076  | -2360.61746229 | -3.5  | 10.6  | -3002.56473570 | -2361.63188882 | -7.3  | 6.8   |
| -2356.94231187  | -2360.60662872 | 3.3   | 2.8   | -2357.98375042 | -2361.62125308 | -0.6  | -1.1  |
| -2666.42032407  | -2360.62916293 | -10.8 | 5.0   | -2667.72182456 | -2361.63913067 | -11.8 | 4.0   |
| -2666.41214083  | -2360.62097969 | -5.7  | 10.1  | -2667.71490453 | -2361.63221064 | -7.5  | 8.3   |
| -2666.45084526  | -2360.65968412 | -30.0 | -13.6 | -2667.75589650 | -2361.67320261 | -33.2 | -16.8 |
| -2666.44729515  | -2360.65613401 | -27.7 | -13.5 | -2667.75214943 | -2361.66945554 | -30.9 | -16.6 |
| -2666.44780530  | -2360.65664416 | -28.1 | -11.7 | -2667.75363075 | -2361.67093686 | -31.8 | -15.4 |
| -2666.41653719  | -2360.62537605 | -8.4  | 4.7   | -2667.71751210 | -2361.63481821 | -9.1  | 4.0   |
| -2666.45076636  | -2360.65960522 | -29.9 | -15.1 | -2667.74833181 | -2361.66563792 | -28.5 | -13.6 |
| -2666.43203350  | -2360.64087236 | -18.2 | -5.8  | -2667.73173197 | -2361.64903808 | -18.0 | -5.6  |
| -2666.42739608  | -2360.63623494 | -15.3 | -1.3  | -2667.73053441 | -2361.64784052 | -17.3 | -3.4  |
| -2666.41941305  | -2360.62825191 | -10.2 | 3.3   | -2667.72612157 | -2361.64342768 | -14.5 | -1.0  |
| -2666.42163297  | -2360.63047183 | -11.6 | 3.2   | -2667.72942134 | -2361.64672745 | -16.6 | -1.8  |
| -2666.41606704  | -2360.62490590 | -8.1  | 7.0   | -2667.72409388 | -2361.64139999 | -13.2 | 1.9   |
| -2666.42091230  | -2360.62975116 | -11.2 | 2.5   | -2667.72880142 | -2361.64610753 | -16.2 | -2.5  |
| -719.91359626   | -2360.63243859 | -12.9 | -14.6 | -720.52025101  | -2361.64523374 | -15.7 | -17.4 |
| -2666.44530626  | -2360.65414512 | -26.5 | -13.0 | -2667.74637394 | -2361.66368005 | -27.2 | -13.7 |
| -2666.42337203  | -2360.63221089 | -12.7 | 0.3   | -2667.72028171 | -2361.63758782 | -10.9 | 2.2   |
| -2666.45822105  | -2360.66705991 | -34.6 | -18.2 | -2667.76169530 | -2361.67900141 | -36.8 | -20.5 |

|                |                |       |       |                |                |       |       |
|----------------|----------------|-------|-------|----------------|----------------|-------|-------|
| -3505.66278446 | -2360.68510582 | -45.9 | -14.8 | -3507.40333005 | -2361.69416906 | -46.4 | -15.3 |
| -3505.66537332 | -2360.68769468 | -47.5 | -13.9 | -3507.40580883 | -2361.69664784 | -47.9 | -14.3 |
| -3505.64652209 | -2360.66884345 | -35.7 | -1.9  | -3507.39421409 | -2361.68505310 | -40.6 | -6.8  |
| -3505.64661905 | -2360.66894041 | -35.8 | -2.2  | -3507.39264679 | -2361.68348580 | -39.7 | -6.1  |
| -3505.66615823 | -2360.68847959 | -48.0 | -14.0 | -3507.41119479 | -2361.70203380 | -51.3 | -17.3 |
| -3505.66267111 | -2360.68499247 | -45.9 | -11.5 | -3507.40952149 | -2361.70036050 | -50.2 | -15.9 |
| -4357.72683468 | -2360.58802518 | 15.0  | 21.1  | -4359.57953482 | -2361.61237849 | 5.0   | 11.1  |
| -2178.85030206 | -2360.57490990 | 23.2  | 21.0  | -2179.77731897 | -2361.59993005 | 12.8  | 10.6  |
| -3000.90779644 | -2360.58632797 | 16.1  | 31.0  | -3002.53929522 | -2361.60644834 | 8.7   | 23.6  |
| -3000.91212273 | -2360.59065426 | 13.3  | 27.0  | -3002.54097568 | -2361.60812880 | 7.6   | 21.3  |
| -3000.93893076 | -2360.61746229 | -3.5  | 10.6  | -3002.56473570 | -2361.63188882 | -7.3  | 6.8   |
| -2356.94231187 | -2360.60662872 | 3.3   | 2.8   | -2357.98375042 | -2361.62125308 | -0.6  | -1.1  |
| -2894.20341177 | -2360.63186994 | -12.5 | 2.3   | -2895.67357946 | -2361.64258258 | -14.0 | 0.8   |
| -2894.19930669 | -2360.62776486 | -9.9  | 5.9   | -2895.67008865 | -2361.63909177 | -11.8 | 4.1   |
| -2894.23824948 | -2360.66670765 | -34.4 | -16.8 | -2895.71115078 | -2361.68015390 | -37.6 | -20.0 |
| -2894.23349154 | -2360.66194971 | -31.4 | -16.3 | -2895.70751386 | -2361.67651698 | -35.3 | -20.1 |
| -2894.23509360 | -2360.66355177 | -32.4 | -18.3 | -2895.70884186 | -2361.67784498 | -36.1 | -22.1 |
| -2894.20395121 | -2360.63240938 | -12.9 | 1.1   | -2895.67302072 | -2361.64202384 | -13.6 | 0.3   |
| -2894.23231395 | -2360.66077212 | -30.7 | -16.2 | -2895.69760040 | -2361.66660352 | -29.1 | -14.6 |
| -2894.21271538 | -2360.64117355 | -18.4 | -5.5  | -2895.68042295 | -2361.64942607 | -18.3 | -5.4  |
| -2894.20811608 | -2360.63657425 | -15.5 | -2.0  | -2895.67946156 | -2361.64846468 | -17.7 | -4.2  |
| -2894.20100942 | -2360.62946759 | -11.0 | 2.8   | -2895.67571927 | -2361.64472239 | -15.3 | -1.5  |
| -2894.20309388 | -2360.63155205 | -12.3 | 1.3   | -2895.67874496 | -2361.64774808 | -17.2 | -3.6  |
| -2894.19755718 | -2360.62601535 | -8.8  | 3.8   | -2895.67370760 | -2361.64271072 | -14.1 | -1.5  |
| -2894.20204965 | -2360.63050782 | -11.7 | 3.0   | -2895.67850972 | -2361.64751284 | -17.1 | -2.4  |
| -947.69330999  | -2360.63177163 | -12.5 | -14.8 | -948.46798210  | -2361.64466184 | -15.3 | -17.7 |
| -2894.22700355 | -2360.65546172 | -27.3 | -12.9 | -2895.69570033 | -2361.66470345 | -27.9 | -13.5 |
| -2894.20506833 | -2360.63352650 | -13.6 | 0.4   | -2895.67007487 | -2361.63907799 | -11.8 | 2.2   |
| -2894.23970774 | -2360.66816591 | -35.3 | -18.3 | -2895.71085309 | -2361.67985621 | -37.4 | -20.4 |
| -3733.45069252 | -2360.69263320 | -50.6 | -17.6 | -3735.35869266 | -2361.70122868 | -50.8 | -17.8 |
| -3733.44957375 | -2360.69151443 | -49.9 | -16.4 | -3735.35831840 | -2361.70085442 | -50.6 | -17.0 |
| -3733.43000564 | -2360.67194632 | -37.7 | -5.7  | -3735.34406823 | -2361.68660425 | -41.6 | -9.6  |
| -3733.42707697 | -2360.66901765 | -35.8 | -4.5  | -3735.34179114 | -2361.68432716 | -40.2 | -8.8  |
| -3733.44893775 | -2360.69087843 | -49.5 | -14.3 | -3735.36222004 | -2361.70475606 | -53.0 | -17.8 |
| -3733.45066894 | -2360.69260962 | -50.6 | -15.1 | -3735.36145478 | -2361.70399080 | -52.5 | -17.0 |

Figure 3

|                |                |       |      |                |                |       |      |
|----------------|----------------|-------|------|----------------|----------------|-------|------|
| -4668.02366684 | -2360.57850523 | 21.0  | 26.4 | -4669.66412365 | -2361.60169299 | 11.7  | 17.1 |
| -2333.99270111 | -2360.55937292 | 33.0  | 31.5 | -2334.81423481 | -2361.58386597 | 22.9  | 21.3 |
| -3156.05264696 | -2360.57324246 | 24.3  | 38.0 | -3157.58061615 | -2361.59478935 | 16.0  | 29.7 |
| -3156.05347454 | -2360.57407004 | 23.8  | 36.9 | -3157.57594475 | -2361.59011795 | 18.9  | 32.1 |
| -3156.08416012 | -2360.60475562 | 4.5   | 18.1 | -3157.60387047 | -2361.61804367 | 1.4   | 15.0 |
| -2512.08633547 | -2360.59271629 | 12.1  | 9.6  | -2513.02274452 | -2361.60726727 | 8.2   | 5.7  |
| -2955.43174365 | -2360.61561541 | -2.3  | 12.4 | -2956.76332928 | -2361.62425806 | -2.5  | 12.2 |
| -2955.41295284 | -2360.59682460 | 9.5   | 24.7 | -2956.74591946 | -2361.60684824 | 8.4   | 23.6 |
| -2955.45351047 | -2360.63738223 | -16.0 | 1.3  | -2956.78771712 | -2361.64864590 | -17.8 | -0.5 |
| -2955.45062982 | -2360.63450158 | -14.2 | 1.2  | -2956.78550648 | -2361.64643526 | -16.4 | -1.0 |
| -2955.45319327 | -2360.63706503 | -15.8 | -1.7 | -2956.78808178 | -2361.64901056 | -18.0 | -3.9 |
| -2955.41783673 | -2360.60170849 | 6.4   | 18.0 | -2956.74747497 | -2361.60840375 | 7.5   | 19.0 |
| -2955.46246899 | -2360.64634075 | -21.6 | -8.4 | -2956.78972398 | -2361.65065276 | -19.1 | -5.8 |
| -2955.44245333 | -2360.62632509 | -9.0  | 3.8  | -2956.77255799 | -2361.63348677 | -8.3  | 4.6  |
| -2955.43900075 | -2360.62287251 | -6.9  | 6.3  | -2956.77229827 | -2361.63322705 | -8.1  | 5.0  |
| -2955.42687915 | -2360.61075091 | 0.7   | 13.5 | -2956.76419560 | -2361.62512438 | -3.0  | 9.7  |
| -2955.43290666 | -2360.61677842 | -3.0  | 11.4 | -2956.77094386 | -2361.63187264 | -7.3  | 7.2  |
| -2955.42788655 | -2360.61175831 | 0.1   | 13.0 | -2956.76612071 | -2361.62704949 | -4.2  | 8.6  |

|                |                |       |       |                |                |       |       |
|----------------|----------------|-------|-------|----------------|----------------|-------|-------|
| -2955.43252825 | -2360.61640001 | -2.8  | 10.8  | -2956.77076389 | -2361.63169267 | -7.2  | 6.4   |
| -853.78202880  | -2360.61932039 | -4.6  | -7.1  | -854.52473821  | -2361.63137344 | -7.0  | -9.4  |
| -2955.45734947 | -2360.64122123 | -18.4 | -5.7  | -2956.78741134 | -2361.64834012 | -17.6 | -4.9  |
| -2955.42907548 | -2360.61294724 | -0.6  | 11.7  | -2956.75666048 | -2361.61758926 | 1.7   | 14.0  |
| -2955.46431481 | -2360.64818657 | -22.8 | -6.9  | -2956.79914108 | -2361.66006986 | -25.0 | -9.1  |
| -3794.66657155 | -2360.66392582 | -32.6 | -1.1  | -3796.43671483 | -2361.67117651 | -31.9 | -0.4  |
| -3794.67188479 | -2360.66923906 | -36.0 | -2.2  | -3796.43932285 | -2361.67378453 | -33.6 | 0.2   |
| -3794.65068312 | -2360.64803739 | -22.7 | 8.6   | -3796.42739291 | -2361.66185459 | -26.1 | 5.2   |
| -3794.65398544 | -2360.65133971 | -24.7 | 7.8   | -3796.42811214 | -2361.66257382 | -26.5 | 6.0   |
| -3794.67289222 | -2360.67024649 | -36.6 | -3.1  | -3796.44918054 | -2361.68364222 | -39.8 | -6.2  |
| -3794.67056357 | -2360.66791784 | -35.1 | -2.4  | -3796.44716339 | -2361.68162507 | -38.5 | -5.8  |
| -4668.02366684 | -2360.57850523 | 21.0  | 26.4  | -4669.66412365 | -2361.60169299 | 11.7  | 17.1  |
| -2333.99270111 | -2360.55937292 | 33.0  | 31.5  | -2334.81423481 | -2361.58386597 | 22.9  | 21.3  |
| -3156.05264696 | -2360.57324246 | 24.3  | 38.0  | -3157.58061615 | -2361.59478935 | 16.0  | 29.7  |
| -3156.05347454 | -2360.57407004 | 23.8  | 36.9  | -3157.57594475 | -2361.59011795 | 18.9  | 32.1  |
| -3156.08416012 | -2360.60475562 | 4.5   | 18.1  | -3157.60387047 | -2361.61804367 | 1.4   | 15.0  |
| -2512.08633547 | -2360.59271629 | 12.1  | 9.6   | -2513.02274452 | -2361.60726727 | 8.2   | 5.7   |
| -2821.56867261 | -2360.61957544 | -4.8  | 9.1   | -2822.76396379 | -2361.62828998 | -5.0  | 8.9   |
| -2821.55458628 | -2360.60548911 | 4.0   | 18.3  | -2822.75127377 | -2361.61559996 | 2.9   | 17.2  |
| -2821.59276964 | -2360.64367247 | -19.9 | -4.0  | -2822.79193165 | -2361.65625784 | -22.6 | -6.6  |
| -2821.59050576 | -2360.64140859 | -18.5 | -5.0  | -2822.79024703 | -2361.65457322 | -21.5 | -8.0  |
| -2821.59302499 | -2360.64392782 | -20.1 | -5.9  | -2822.79214528 | -2361.65647147 | -22.7 | -8.5  |
| -2821.55885343 | -2360.60975626 | 1.4   | 12.0  | -2822.75280606 | -2361.61713225 | 2.0   | 12.6  |
| -2821.59739772 | -2360.64830055 | -22.8 | -10.9 | -2822.78820671 | -2361.65253290 | -20.2 | -8.3  |
| -2821.57756198 | -2360.62846481 | -10.4 | 0.6   | -2822.77110010 | -2361.63542629 | -9.5  | 1.5   |
| -2821.57345899 | -2360.62436182 | -7.8  | 4.4   | -2822.77035356 | -2361.63467975 | -9.0  | 3.2   |
| -2821.56187133 | -2360.61277416 | -0.5  | 11.9  | -2822.76308106 | -2361.62740725 | -4.5  | 7.9   |
| -2821.56785385 | -2360.61875668 | -4.3  | 7.5   | -2822.76984926 | -2361.63417545 | -8.7  | 3.1   |
| -2821.56236839 | -2360.61327122 | -0.8  | 12.4  | -2822.76469219 | -2361.62901838 | -5.5  | 7.7   |
| -2821.56756206 | -2360.61846489 | -4.1  | 9.4   | -2822.76961279 | -2361.63393898 | -8.6  | 4.9   |
| -719.91359626  | -2360.61791892 | -3.8  | -6.9  | -720.52025101  | -2361.63028365 | -6.3  | -9.4  |
| -2821.59155404 | -2360.64245687 | -19.2 | -7.6  | -2822.78547624 | -2361.64980243 | -18.5 | -6.9  |
| -2821.56465884 | -2360.61556167 | -2.3  | 10.0  | -2822.75651358 | -2361.62083977 | -0.3  | 11.9  |
| -2821.60123556 | -2360.65213839 | -25.2 | -10.2 | -2822.79934760 | -2361.66367379 | -27.2 | -12.2 |
| -3660.81041560 | -2360.67480093 | -39.5 | -7.6  | -3662.44327896 | -2361.68113805 | -38.2 | -6.3  |
| -3660.80672447 | -2360.67110980 | -37.1 | -3.2  | -3662.44127263 | -2361.67913172 | -36.9 | -2.9  |
| -3660.78424951 | -2360.64863484 | -23.0 | 7.8   | -3662.42777971 | -2361.66563880 | -28.5 | 2.4   |
| -3660.79016001 | -2360.65454534 | -26.7 | 5.2   | -3662.42831798 | -2361.66617707 | -28.8 | 3.1   |
| -3660.80837623 | -2360.67276156 | -38.2 | -4.9  | -3662.44735085 | -2361.68520994 | -40.7 | -7.5  |
| -3660.80540300 | -2360.66978833 | -36.3 | -3.8  | -3662.44430160 | -2361.68216069 | -38.8 | -6.3  |
| -4668.02366684 | -2360.57850523 | 21.0  | 26.4  | -4669.66412365 | -2361.60169299 | 11.7  | 17.1  |
| -2333.99270111 | -2360.55937292 | 33.0  | 31.5  | -2334.81423481 | -2361.58386597 | 22.9  | 21.3  |
| -3156.05264696 | -2360.57324246 | 24.3  | 38.0  | -3157.58061615 | -2361.59478935 | 16.0  | 29.7  |
| -3156.05347454 | -2360.57407004 | 23.8  | 36.9  | -3157.57594475 | -2361.59011795 | 18.9  | 32.1  |
| -3156.08416012 | -2360.60475562 | 4.5   | 18.1  | -3157.60387047 | -2361.61804367 | 1.4   | 15.0  |
| -2512.08633547 | -2360.59271629 | 12.1  | 9.6   | -2513.02274452 | -2361.60726727 | 8.2   | 5.7   |
| -3049.35173339 | -2360.62225553 | -6.5  | 8.0   | -3050.71518151 | -2361.63120471 | -6.9  | 7.6   |
| -3049.34279685 | -2360.61331899 | -0.9  | 13.7  | -3050.70748183 | -2361.62350503 | -2.0  | 12.5  |
| -3049.37999853 | -2360.65052067 | -24.2 | -7.2  | -3050.74744602 | -2361.66346922 | -27.1 | -10.1 |
| -3049.37647830 | -2360.64700044 | -22.0 | -7.0  | -3050.74481330 | -2361.66083650 | -25.4 | -10.5 |
| -3049.37884777 | -2360.64936991 | -23.5 | -9.1  | -3050.74662773 | -2361.66265093 | -26.6 | -12.2 |
| -3049.34680829 | -2360.61733043 | -3.4  | 8.8   | -3050.70851787 | -2361.62454107 | -2.7  | 9.5   |
| -3049.37796617 | -2360.64848831 | -22.9 | -10.1 | -3050.73687675 | -2361.65289995 | -20.5 | -7.6  |
| -3049.35882410 | -2360.62934624 | -10.9 | 1.2   | -3050.72079536 | -2361.63681856 | -10.4 | 1.8   |
| -3049.35471656 | -2360.62523870 | -8.4  | 3.9   | -3050.71961650 | -2361.63563970 | -9.6  | 2.7   |

|                |                |       |       |                |                |       |       |
|----------------|----------------|-------|-------|----------------|----------------|-------|-------|
| -3049.34282657 | -2360.61334871 | -0.9  | 11.8  | -3050.71209175 | -2361.62811495 | -4.9  | 7.8   |
| -3049.34978523 | -2360.62030737 | -5.3  | 7.9   | -3050.71972442 | -2361.63574762 | -9.7  | 3.4   |
| -3049.34404412 | -2360.61456626 | -1.7  | 12.0  | -3050.71435123 | -2361.63037443 | -6.3  | 7.3   |
| -3049.34902889 | -2360.61955103 | -4.8  | 7.9   | -3050.71925529 | -2361.63527849 | -9.4  | 3.3   |
| -947.69330999  | -2360.61725196 | -3.3  | -7.1  | -948.46798210  | -2361.62971175 | -5.9  | -9.6  |
| -3049.37305057 | -2360.64357271 | -19.9 | -5.9  | -3050.73462261 | -2361.65064581 | -19.1 | -5.1  |
| -3049.34583522 | -2360.61635736 | -2.8  | 10.4  | -3050.70546576 | -2361.62148896 | -0.8  | 12.5  |
| -3049.38372100 | -2360.65424314 | -26.6 | -12.1 | -3050.74998920 | -2361.66601240 | -28.7 | -14.2 |
| -3888.59557000 | -2360.67957465 | -42.5 | -9.1  | -3890.39731555 | -2361.68687165 | -41.8 | -8.4  |
| -3888.59293034 | -2360.67693499 | -40.8 | -7.2  | -3890.39533822 | -2361.68489432 | -40.5 | -7.0  |
| -3888.57215316 | -2360.65615781 | -27.8 | 3.7   | -3890.38038994 | -2361.66994604 | -31.2 | 0.3   |
| -3888.57389039 | -2360.65789504 | -28.8 | 3.4   | -3890.37958558 | -2361.66914168 | -30.7 | 1.6   |
| -3888.59070815 | -2360.67471280 | -39.4 | -5.0  | -3890.39754616 | -2361.68710226 | -41.9 | -7.6  |
| -3888.58747342 | -2360.67147807 | -37.4 | -4.6  | -3890.39404561 | -2361.68360171 | -39.7 | -6.9  |

Figure 4

|                |                |       |      |                |                |       |      |
|----------------|----------------|-------|------|----------------|----------------|-------|------|
| -2316.35155405 | -2360.54481398 | 42.1  | 40.7 | -2317.39059075 | -2361.57230175 | 30.1  | 28.7 |
| -3138.41370631 | -2360.56088993 | 32.0  | 46.8 | -3140.15633505 | -2361.58258810 | 23.7  | 38.4 |
| -3138.41704256 | -2360.56422618 | 29.9  | 45.6 | -3140.15708512 | -2361.58333817 | 23.2  | 38.9 |
| -3138.44111550 | -2360.58829912 | 14.8  | 30.0 | -3140.17805588 | -2361.60430893 | 10.0  | 25.2 |
| -2494.44667915 | -2360.57964809 | 20.3  | 20.6 | -2495.59893082 | -2361.59553341 | 15.5  | 15.9 |
| -2937.79614532 | -2360.60660520 | 3.3   | 22.3 | -2939.34569103 | -2361.61869966 | 1.0   | 19.9 |
| -2937.78880607 | -2360.59926595 | 7.9   | 26.7 | -2939.33983165 | -2361.61284028 | 4.7   | 23.4 |
| -2937.77886975 | -2360.58932963 | 14.2  | 30.5 | -2939.33187354 | -2361.60488217 | 9.7   | 26.0 |
| -2937.81630486 | -2360.62676474 | -9.3  | 10.9 | -2939.36688970 | -2361.63989833 | -12.3 | 7.9  |
| -2937.81355803 | -2360.62401791 | -7.6  | 11.9 | -2939.36681224 | -2361.63982087 | -12.3 | 7.2  |
| -2937.81534669 | -2360.62580657 | -8.7  | 9.8  | -2939.36741443 | -2361.64042306 | -12.6 | 5.9  |
| -2937.79265217 | -2360.60311205 | 5.5   | 21.3 | -2939.34076928 | -2361.61377791 | 4.1   | 19.9 |
| -2937.82231063 | -2360.63277051 | -13.1 | 2.8  | -2939.36745170 | -2361.64046033 | -12.7 | 3.2  |
| -853.78202880  | -2360.60416714 | 4.9   | 3.9  | -854.52473821  | -2361.61844224 | 1.2   | 0.2  |
| -3777.02648401 | -2360.65042640 | -24.2 | 10.3 | -3779.01385830 | -2361.66039983 | -25.2 | 9.3  |
| -3777.03525859 | -2360.65920098 | -29.7 | 7.8  | -3779.01870981 | -2361.66525134 | -28.2 | 9.2  |
| -3777.00677230 | -2360.63071469 | -11.8 | 20.4 | -3778.99796003 | -2361.64450156 | -15.2 | 17.0 |
| -3777.00363213 | -2360.62757452 | -9.8  | 22.4 | -3778.99719929 | -2361.64374082 | -14.7 | 17.5 |
| -3777.01019105 | -2360.63413344 | -13.9 | 21.8 | -3779.00303997 | -2361.64958150 | -18.4 | 17.4 |
| -3777.00534283 | -2360.62928522 | -10.9 | 25.1 | -3779.00063716 | -2361.64717869 | -16.9 | 19.1 |
| -3777.01015070 | -2360.63409309 | -13.9 | 18.7 | -3779.00650925 | -2361.65305078 | -20.6 | 12.0 |
| -3777.01892753 | -2360.64286992 | -19.4 | 17.3 | -3779.01379530 | -2361.66033683 | -25.1 | 11.6 |
| -2182.48260214 | -2360.54289313 | 43.3  | 41.4 | -2183.38563437 | -2361.57074278 | 31.1  | 29.1 |
| -3004.54846505 | -2360.56267973 | 30.9  | 46.4 | -3006.15291285 | -2361.58256331 | 23.7  | 39.2 |
| -3004.55139767 | -2360.56561235 | 29.1  | 45.2 | -3006.15320929 | -2361.58285975 | 23.5  | 39.7 |
| -3004.57418159 | -2360.58839627 | 14.8  | 29.3 | -3006.17543459 | -2361.60508505 | 9.5   | 24.0 |
| -2360.57748535 | -2360.57748535 | 21.6  | 19.8 | -2361.59374933 | -2361.59374933 | 16.7  | 14.9 |
| -2670.06403240 | -2360.60855441 | 2.1   | 19.5 | -2671.34014222 | -2361.61994567 | 0.2   | 17.6 |
| -2670.05980181 | -2360.60432382 | 4.8   | 21.5 | -2671.33724905 | -2361.61705250 | 2.0   | 18.8 |
| -2670.05301436 | -2360.59753637 | 9.0   | 26.0 | -2671.33358714 | -2361.61339059 | 4.3   | 21.3 |
| -2670.08466310 | -2360.62918511 | -10.8 | 5.6  | -2671.36250075 | -2361.64230420 | -13.8 | 2.6  |
| -2670.08127030 | -2360.62579231 | -8.7  | 7.2  | -2671.36192322 | -2361.64172667 | -13.5 | 2.5  |
| -2670.08354222 | -2360.62806423 | -10.1 | 5.6  | -2671.36297950 | -2361.64278295 | -14.1 | 1.6  |
| -2670.06330442 | -2360.60782643 | 2.6   | 16.2 | -2671.33762513 | -2361.61742858 | 1.8   | 15.4 |
| -2670.08687673 | -2360.63139874 | -12.2 | 3.1  | -2671.35796999 | -2361.63777344 | -11.0 | 4.4  |
| -719.91359626  | -2360.60096330 | 6.9   | 4.4  | -720.52025101  | -2361.61520932 | 3.2   | 0.7  |
| -3509.30027501 | -2360.65827952 | -29.1 | 4.4  | -3511.01482605 | -2361.66816240 | -30.0 | 3.4  |
| -3509.30407582 | -2360.66208033 | -31.5 | 5.0  | -3511.01617062 | -2361.66950697 | -30.9 | 5.6  |
| -3509.27081329 | -2360.62881780 | -10.6 | 22.5 | -3510.99105736 | -2361.64439371 | -15.1 | 17.9 |

|                |                |       |      |                |                |       |      |
|----------------|----------------|-------|------|----------------|----------------|-------|------|
| -3509.27246028 | -2360.63046479 | -11.6 | 21.8 | -3510.99373044 | -2361.64706679 | -16.8 | 16.6 |
| -3509.27371772 | -2360.63172223 | -12.4 | 22.6 | -3510.99375582 | -2361.64709217 | -16.8 | 18.2 |
| -3509.26852553 | -2360.62653004 | -9.2  | 24.6 | -3510.99051693 | -2361.64385328 | -14.8 | 19.0 |
| -3509.27335061 | -2360.63135512 | -12.2 | 21.2 | -3510.99538739 | -2361.64872374 | -17.8 | 15.6 |
| -3509.27906286 | -2360.63706737 | -15.8 | 19.1 | -3510.99894487 | -2361.65228122 | -20.1 | 14.8 |
| -2410.26062260 | -2360.54053291 | 44.8  | 43.1 | -2411.33108586 | -2361.56789128 | 32.9  | 31.2 |
| -3232.32726546 | -2360.56109946 | 31.9  | 49.2 | -3234.10143029 | -2361.58277776 | 23.5  | 40.9 |
| -3232.33095360 | -2360.56478760 | 29.6  | 46.0 | -3234.10198795 | -2361.58333542 | 23.2  | 39.6 |
| -3232.34503302 | -2360.57886702 | 20.7  | 35.0 | -3234.11325730 | -2361.59460477 | 16.1  | 30.4 |
| -2588.35763461 | -2360.57725393 | 21.8  | 21.9 | -2589.54203182 | -2361.59372883 | 16.7  | 16.8 |
| -3125.63102428 | -2360.61478492 | -1.8  | 16.2 | -3127.24468537 | -2361.62788284 | -4.8  | 13.3 |
| -3125.62814292 | -2360.61190356 | 0.0   | 18.1 | -3127.24332190 | -2361.62651937 | -3.9  | 14.2 |
| -3125.61986331 | -2360.60362395 | 5.2   | 19.9 | -3127.23538629 | -2361.61858376 | 1.1   | 15.8 |
| -3125.65040280 | -2360.63416344 | -14.0 | 6.3  | -3127.26678192 | -2361.64997939 | -18.6 | 1.6  |
| -3125.64833486 | -2360.63209550 | -12.7 | 4.9  | -3127.26656262 | -2361.64976009 | -18.5 | -1.0 |
| -3125.66059922 | -2360.63435986 | -14.1 | 3.7  | -3127.26647745 | -2361.64967492 | -18.4 | -0.7 |
| -3125.63166393 | -2360.61542457 | -2.2  | 13.6 | -3127.24261450 | -2361.62581197 | -3.5  | 12.4 |
| -3125.65053661 | -2360.63429725 | -14.0 | 3.6  | -3127.25878147 | -2361.64197894 | -13.6 | 4.0  |
| -947.69330999  | -2360.59964231 | 7.7   | 4.8  | -948.46798210  | -2361.61442242 | 3.7   | 0.8  |
| -3964.86537215 | -2360.66261530 | -31.8 | 1.2  | -3966.91617691 | -2361.67290728 | -33.0 | 0.0  |
| -3964.87099805 | -2360.66824120 | -35.3 | 1.8  | -3966.91911991 | -2361.67585028 | -34.9 | 2.3  |
| -3964.83192362 | -2360.62916677 | -10.8 | 20.9 | -3966.88808964 | -2361.64482001 | -15.4 | 16.3 |
| -3964.83025407 | -2360.62749722 | -9.8  | 24.0 | -3966.88787055 | -2361.64460092 | -15.3 | 18.5 |
| -3964.83329981 | -2360.63054296 | -11.7 | 23.3 | -3966.89168136 | -2361.64841173 | -17.6 | 17.4 |
| -3964.83046656 | -2360.62770971 | -9.9  | 24.1 | -3966.88896723 | -2361.64569760 | -15.9 | 18.1 |
| -3964.83467890 | -2360.63192205 | -12.5 | 22.2 | -3966.89610917 | -2361.65283954 | -20.4 | 14.3 |
| -3964.83758434 | -2360.63482749 | -14.4 | 20.3 | -3966.89550631 | -2361.65223668 | -20.0 | 14.6 |

Figure 5

|                |                |       |      |                |                |       |      |
|----------------|----------------|-------|------|----------------|----------------|-------|------|
| -2105.29353601 | -2360.52402560 | 55.2  | 53.7 | -2106.15647146 | -2361.55335336 | 42.0  | 40.5 |
| -2927.34643927 | -2360.53085255 | 50.9  | 64.6 | -2928.91884570 | -2361.56026965 | 37.7  | 51.4 |
| -2927.34582967 | -2360.53024295 | 51.3  | 65.6 | -2928.91629015 | -2361.55771410 | 39.3  | 53.6 |
| -2927.40351854 | -2360.58793182 | 15.1  | 29.6 | -2928.96282305 | -2361.60424700 | 10.1  | 24.6 |
| -2283.40117354 | -2360.57137213 | 25.4  | 24.1 | -2284.37791805 | -2361.58969154 | 19.2  | 17.9 |
| -2592.87444071 | -2360.58916131 | 14.3  | 27.5 | -2594.11352308 | -2361.60510002 | 9.5   | 22.8 |
| -2592.85171386 | -2360.56643446 | 28.5  | 42.3 | -2594.09041397 | -2361.58199091 | 24.0  | 37.8 |
| -2592.89952742 | -2360.61424802 | -1.5  | 13.7 | -2594.13969762 | -2361.63127456 | -6.9  | 8.3  |
| -2592.89923466 | -2360.61395526 | -1.3  | 13.6 | -2594.13957453 | -2361.63115147 | -6.8  | 8.0  |
| -2592.90142514 | -2360.61614574 | -2.7  | 12.2 | -2594.14144431 | -2361.63302125 | -8.0  | 6.8  |
| -2592.85649333 | -2360.57121393 | 25.5  | 37.2 | -2594.09304137 | -2361.58461831 | 22.4  | 34.1 |
| -2592.90325737 | -2360.61797797 | -3.8  | 8.5  | -2594.13815374 | -2361.62973068 | -5.9  | 6.4  |
| -3432.11661049 | -2360.64481360 | -20.6 | 10.4 | -3433.79359523 | -2361.65870507 | -24.1 | 6.9  |
| -3432.09583327 | -2360.62403638 | -7.6  | 24.5 | -3433.77743644 | -2361.64254628 | -14.0 | 18.2 |
| -3432.09787875 | -2360.62608186 | -8.9  | 24.6 | -3433.78006244 | -2361.64517228 | -15.6 | 17.9 |
| -3432.13037187 | -2360.65857498 | -29.3 | 3.5  | -3433.81336741 | -2361.67847725 | -36.5 | -3.7 |

Figure 8

|                |                |      |      |                |                |      |      |
|----------------|----------------|------|------|----------------|----------------|------|------|
| -4501.28636762 | -1873.05465006 | 0.0  | 0.0  | -4503.31808352 | -1873.68596905 | 0.0  | 0.0  |
| -2316.35155405 | -1873.02904499 | 16.1 | 15.9 | -2317.39059075 | -1873.66699679 | 11.9 | 11.7 |
| -4632.75334354 | -1873.05416271 | 0.3  | 9.1  | -4634.82738877 | -1873.69010042 | -2.6 | 6.2  |
| -4632.75266233 | -1873.05382211 | 0.5  | 9.8  | -4634.82566708 | -1873.68923958 | -2.1 | 7.2  |
| -4501.28636762 | -1873.05465006 | 0.0  | 0.0  | -4503.31808352 | -1873.68596905 | 0.0  | 0.0  |
| -2182.48260214 | -1873.02712415 | 17.3 | 16.5 | -2183.38563437 | -1873.66543782 | 12.9 | 12.1 |

|                |                |      |      |                |                |      |      |
|----------------|----------------|------|------|----------------|----------------|------|------|
| -4365.02200811 | -1873.05552606 | -0.5 | 8.3  | -4366.82325217 | -1873.69142953 | -3.4 | 5.4  |
| -4365.02027833 | -1873.05466117 | 0.0  | 8.7  | -4366.82105432 | -1873.69033061 | -2.7 | 5.9  |
| -4501.28636762 | -1873.05465006 | 0.0  | 0.0  | -4503.31808352 | -1873.68596905 | 0.0  | 0.0  |
| -2410.26062260 | -1873.02476392 | 18.8 | 18.3 | -2411.33108586 | -1873.66258632 | 14.7 | 14.2 |
| -4820.58353572 | -1873.05590918 | -0.8 | 7.4  | -4822.72041747 | -1873.69170919 | -3.6 | 4.6  |
| -4820.58254522 | -1873.05541393 | -0.5 | 8.9  | -4822.71930640 | -1873.69115366 | -3.3 | 6.1  |

**Figure 9**

|                |                |       |      |                |                |       |      |
|----------------|----------------|-------|------|----------------|----------------|-------|------|
| -2106.01986092 | -2106.01986092 | 0.0   | 0.0  | -2106.89488626 | -2106.89488626 | 0.0   | 0.0  |
| -2549.34485975 | -2106.02235069 | -1.6  | 14.3 | -2550.62074583 | -2106.89715187 | -1.4  | 14.4 |
| -2549.34303493 | -2106.02052587 | -0.4  | 16.7 | -2550.62024326 | -2106.89664930 | -1.1  | 16.0 |
| -2106.01986092 | -2106.01986092 | 0.0   | 0.0  | -2106.89488626 | -2106.89488626 | 0.0   | 0.0  |
| -2415.48251933 | -2106.02704134 | -4.5  | 12.0 | -2416.62184512 | -2106.90164857 | -4.2  | 12.3 |
| -2415.48084182 | -2106.02536383 | -3.5  | 13.2 | -2416.62154008 | -2106.90134353 | -4.1  | 12.6 |
| -2106.01986092 | -2106.01986092 | 0.0   | 0.0  | -2106.89488626 | -2106.89488626 | 0.0   | 0.0  |
| -2643.26446591 | -2106.02860723 | -5.5  | 9.6  | -2644.57292623 | -2106.90442669 | -6.0  | 9.1  |
| -2643.26586213 | -2106.03000345 | -6.4  | 11.4 | -2644.57318368 | -2106.90468414 | -6.1  | 11.6 |
| -2268.24693747 | -2268.24693747 | 0.0   | 0.0  | -2269.13807551 | -2269.13807551 | 0.0   | 0.0  |
| -2711.60533739 | -2268.28282833 | -22.5 | -4.6 | -2712.89841293 | -2269.17481897 | -23.1 | -5.2 |
| -2711.60533760 | -2268.28282854 | -22.5 | -4.6 | -2712.89841299 | -2269.17481903 | -23.1 | -5.2 |
| -2268.24693747 | -2268.24693747 | 0.0   | 0.0  | -2269.13807551 | -2269.13807551 | 0.0   | 0.0  |
| -2577.73996610 | -2268.28448811 | -23.6 | -6.8 | -2578.89705234 | -2269.17685579 | -24.3 | -7.6 |
| -2577.73979530 | -2268.28431731 | -23.5 | -6.6 | -2578.89706616 | -2269.17686961 | -24.3 | -7.5 |
| -2268.24693747 | -2268.24693747 | 0.0   | 0.0  | -2269.13807551 | -2269.13807551 | 0.0   | 0.0  |
| -2805.52168423 | -2268.28582555 | -24.4 | -6.0 | -2806.84660944 | -2269.17810990 | -25.1 | -6.7 |
| -2805.52168431 | -2268.28582563 | -24.4 | -6.0 | -2806.84660942 | -2269.17810988 | -25.1 | -6.7 |

**Fig. S10**

|                |                |      |      |                |                |       |      |
|----------------|----------------|------|------|----------------|----------------|-------|------|
| -2075.19265695 | -2914.37917444 | 0.0  | 0.0  | -2075.89824977 | -2915.52471687 | 0.0   | 0.0  |
| -2075.18240589 | -2914.36892338 | 6.4  | 5.7  | -2075.88936094 | -2915.51582804 | 5.6   | 4.9  |
| -2075.17405895 | -2914.36057644 | 11.7 | 10.7 | -2075.88191308 | -2915.50838018 | 10.3  | 9.3  |
| -2075.16548971 | -2914.35200720 | 17.0 | 16.7 | -2075.87419945 | -2915.50066655 | 15.1  | 14.8 |
| -2914.37946319 | -2914.37946319 | -0.2 | 14.7 | -2915.53060384 | -2915.53060384 | -3.7  | 11.2 |
| -2914.37945489 | -2914.37945489 | -0.2 | 14.8 | -2915.53051616 | -2915.53051616 | -3.6  | 11.3 |
| -2914.37832153 | -2914.37832153 | 0.5  | 14.7 | -2915.52915693 | -2915.52915693 | -2.8  | 11.4 |
| -2914.37681722 | -2914.37681722 | 1.5  | 16.5 | -2915.52760834 | -2915.52760834 | -1.8  | 13.2 |
| -2914.37668368 | -2914.37668368 | 1.6  | 15.3 | -2915.52672711 | -2915.52672711 | -1.3  | 12.5 |
| -2914.37674569 | -2914.37674569 | 1.5  | 15.9 | -2915.52685906 | -2915.52685906 | -1.3  | 13.0 |
| -2914.37596634 | -2914.37596634 | 2.0  | 15.7 | -2915.52586131 | -2915.52586131 | -0.7  | 13.0 |
| -2914.37544645 | -2914.37544645 | 2.3  | 17.7 | -2915.52533653 | -2915.52533653 | -0.4  | 15.0 |
| -2914.39108658 | -2914.39108658 | -7.5 | 7.5  | -2915.54071711 | -2915.54071711 | -10.0 | 4.9  |
| -2914.39074163 | -2914.39074163 | -7.3 | 7.9  | -2915.54069969 | -2915.54069969 | -10.0 | 5.1  |
| -2914.39148707 | -2914.39148707 | -7.7 | 8.3  | -2915.54131709 | -2915.54131709 | -10.4 | 5.6  |
| -2914.39148705 | -2914.39148705 | -7.7 | 8.3  | -2915.54131711 | -2915.54131711 | -10.4 | 5.6  |
| -2914.39047688 | -2914.39047688 | -7.1 | 9.5  | -2915.54045518 | -2915.54045518 | -9.9  | 6.7  |
| -2914.39047684 | -2914.39047684 | -7.1 | 9.5  | -2915.54045517 | -2915.54045517 | -9.9  | 6.7  |

|                |                |      |      |                |                |      |      |
|----------------|----------------|------|------|----------------|----------------|------|------|
| -2914.38178913 | -2914.38178913 | -1.6 | 9.2  | -2915.53520027 | -2915.53520027 | -6.6 | 4.3  |
| -2914.38260788 | -2914.38260788 | -2.2 | 10.4 | -2915.53540450 | -2915.53540450 | -6.7 | 5.9  |
| -2914.38039449 | -2914.38039449 | -0.8 | 11.1 | -2915.53369427 | -2915.53369427 | -5.6 | 6.2  |
| -2914.38152590 | -2914.38152590 | -1.5 | 11.9 | -2915.53549564 | -2915.53549564 | -6.8 | 6.6  |
| -2914.38073918 | -2914.38073918 | -1.0 | 12.2 | -2915.53441854 | -2915.53441854 | -6.1 | 7.1  |
| -2914.37955350 | -2914.37955350 | -0.2 | 13.2 | -2915.53363176 | -2915.53363176 | -5.6 | 7.8  |
| -2140.93383702 | -2980.12035451 | 0.0  | 0.0  | -2141.57039794 | -2981.19686504 | 0.0  | 0.0  |
| -2140.92618067 | -2980.11269816 | 4.8  | 5.8  | -2141.56294282 | -2981.18940992 | 4.7  | 5.7  |
| -2140.91898069 | -2980.10549818 | 9.3  | 10.9 | -2141.55598597 | -2981.18245307 | 9.0  | 10.6 |
| -2140.91137789 | -2980.09789538 | 14.1 | 15.2 | -2141.54815693 | -2981.17462403 | 14.0 | 15.0 |
| -2980.11965190 | -2980.11965190 | 0.4  | 15.6 | -2981.19993262 | -2981.19993262 | -1.9 | 13.2 |
| -2980.11994435 | -2980.11994435 | 0.3  | 15.5 | -2981.19903574 | -2981.19903574 | -1.4 | 13.8 |
| -2980.11947742 | -2980.11947742 | 0.6  | 17.2 | -2981.19873048 | -2981.19873048 | -1.2 | 15.5 |
| -2980.11947737 | -2980.11947737 | 0.6  | 17.2 | -2981.19873041 | -2981.19873041 | -1.2 | 15.5 |
| -2980.12030703 | -2980.12030703 | 0.0  | 15.3 | -2981.19793706 | -2981.19793706 | -0.7 | 14.6 |
| -2980.11981392 | -2980.11981392 | 0.3  | 16.2 | -2981.19830483 | -2981.19830483 | -0.9 | 14.9 |
| -2980.11981396 | -2980.11981396 | 0.3  | 16.2 | -2981.19830487 | -2981.19830487 | -0.9 | 14.9 |
| -2980.11705353 | -2980.11705353 | 2.1  | 17.3 | -2981.19559112 | -2981.19559112 | 0.8  | 16.0 |
| -1985.79035676 | -2824.97687425 | 0.0  | 0.0  | -1986.53187940 | -2826.15834650 | 0.0  | 0.0  |
| -1985.78046851 | -2824.96698600 | 6.2  | 7.6  | -1986.52281850 | -2826.14928560 | 5.7  | 7.0  |
| -1985.77120101 | -2824.95771850 | 12.0 | 12.6 | -1986.51406654 | -2826.14053364 | 11.2 | 11.7 |
| -1985.76082970 | -2824.94734719 | 18.5 | 18.4 | -1986.50407463 | -2826.13054173 | 17.4 | 17.4 |
| -2824.97470147 | -2824.97470147 | 1.4  | 15.4 | -2826.16021083 | -2826.16021083 | -1.2 | 12.8 |
| -2824.97351672 | -2824.97351672 | 2.1  | 16.3 | -2826.15894139 | -2826.15894139 | -0.4 | 13.8 |
| -2824.97383096 | -2824.97383096 | 1.9  | 17.2 | -2826.16050741 | -2826.16050741 | -1.4 | 13.9 |
| -2824.97438576 | -2824.97438576 | 1.6  | 16.9 | -2826.15952749 | -2826.15952749 | -0.7 | 14.6 |
| -2824.97398663 | -2824.97398663 | 1.8  | 17.2 | -2826.15864400 | -2826.15864400 | -0.2 | 15.2 |
| -2824.97398670 | -2824.97398670 | 1.8  | 17.2 | -2826.15864426 | -2826.15864426 | -0.2 | 15.2 |
| -2824.97394208 | -2824.97394208 | 1.8  | 16.7 | -2826.15728740 | -2826.15728740 | 0.7  | 15.5 |
| -2824.97094555 | -2824.97094555 | 3.7  | 19.0 | -2826.15515051 | -2826.15515051 | 2.0  | 17.3 |

$E_{sp}$  ..... single point electronic energy in thf (SMD) in hartree with Def2TZVPP

$E_{sp}$  (sum) single point electronic energy in thf (SMD) in hartree with Def2TZVPP after mass balance

$\Delta E_{sp}$  ... relative single point electronic energy in thf(SMD) in kcal/mol with Def2TZVPP

$\Delta G_{sp}$  ... relative single point free energy in thf(SMD) in kcal/mol ( $\Delta G_{sp} = \Delta E_{sp}/\text{Def2TZVPP} + \Delta G_{\text{con}}[\text{level of optimization}]$ )



## Single point energies in Figures 1–10 with BP86-D3BJ and PBE0-D3BJ

| BP86-D3BJ/Def2TZVPP thf(SMD) |                             |                               |                               | PBE0-D3BJ/Def2TZVPP thf(SMD) |                             |                               |                               |
|------------------------------|-----------------------------|-------------------------------|-------------------------------|------------------------------|-----------------------------|-------------------------------|-------------------------------|
| $E_{sp}$<br>[hartree]        | $E_{sp}$ (sum)<br>[hartree] | $\Delta E_{sp}$<br>[kcal/mol] | $\Delta G_{sp}$<br>[kcal/mol] | $E_{sp}$<br>[hartree]        | $E_{sp}$ (sum)<br>[hartree] | $\Delta E_{sp}$<br>[kcal/mol] | $\Delta G_{sp}$<br>[kcal/mol] |
| -822.91432061                |                             |                               |                               | -821.94869064                |                             |                               |                               |
| -644.69434069                |                             |                               |                               | -643.93532528                |                             |                               |                               |
| -395.51182271                |                             |                               |                               | -395.11999426                |                             |                               |                               |
| -2630.16132995               |                             |                               |                               | -2627.72774896               |                             |                               |                               |
| -306.15260557                |                             |                               |                               | -305.77960062                |                             |                               |                               |
| -461.20902678                |                             |                               |                               | -460.88581488                |                             |                               |                               |
| -232.55698528                |                             |                               |                               | -232.28199333                |                             |                               |                               |
| -443.82238654                |                             |                               |                               | -443.27274318                |                             |                               |                               |
| -309.78612087                |                             |                               |                               | -309.40128801                |                             |                               |                               |
| -537.77787666                |                             |                               |                               | -537.13780135                |                             |                               |                               |
| -839.77094997                |                             |                               |                               | -839.03710930                |                             |                               |                               |
| -2102.64636097               |                             |                               |                               | -2101.80357820               |                             |                               |                               |
| -1947.60447108               |                             |                               |                               | -1946.71054354               |                             |                               |                               |
| -2085.24428915               |                             |                               |                               | -2084.17399646               |                             |                               |                               |
| -1951.20535915               |                             |                               |                               | -1950.30012369               |                             |                               |                               |
| -2179.19720728               |                             |                               |                               | -2178.03642956               |                             |                               |                               |
| <b>Figure 1</b>              |                             |                               |                               |                              |                             |                               |                               |
| -4504.24272347               | -2362.08749432              | 18.8                          | 17.6                          | -4501.00064360               | -2360.68754801              | 19.8                          | 18.6                          |
| -5327.17133101               | -2362.10178125              | 9.9                           | 31.7                          | -5322.95431599               | -2360.69252976              | 16.6                          | 38.5                          |
| -5327.16724659               | -2362.09769683              | 12.4                          | 33.0                          | -5322.95351526               | -2360.69172903              | 17.1                          | 37.7                          |
| -5327.15615544               | -2362.08660568              | 19.4                          | 37.5                          | -5322.94599781               | -2360.68421158              | 21.9                          | 40.0                          |
| -5327.17369281               | -2362.10414305              | 8.4                           | 30.2                          | -5322.95410216               | -2360.69231593              | 16.8                          | 38.7                          |
| -5327.20291007               | -2362.13336031              | -10.0                         | 6.7                           | -5322.99174808               | -2360.72996185              | -6.8                          | 9.9                           |
| -4682.49270204               | -2362.11749296              | 0.0                           | 0.0                           | -4679.04551613               | -2360.71905518              | 0.0                           | 0.0                           |
| -4682.49220628               | -2362.11699720              | 0.3                           | 1.6                           | -4679.04510348               | -2360.71864253              | 0.3                           | 1.5                           |
| -4682.47604050               | -2362.10083142              | 10.5                          | 8.4                           | -4679.03240069               | -2360.70593974              | 8.2                           | 6.1                           |
| -4682.47396352               | -2362.09875444              | 11.8                          | 11.0                          | -4679.03127559               | -2360.70481464              | 8.9                           | 8.2                           |
| -4682.47943375               | -2362.10422467              | 8.3                           | 9.4                           | -4679.03431305               | -2360.70785210              | 7.0                           | 8.1                           |
| -4682.47730342               | -2362.10209434              | 9.7                           | 10.0                          | -4679.03238462               | -2360.70592367              | 8.2                           | 8.5                           |
| -4682.47336530               | -2362.09815622              | 12.1                          | 11.5                          | -4679.03037064               | -2360.70390969              | 9.5                           | 8.9                           |
| -4682.47432383               | -2362.09911475              | 11.5                          | 12.7                          | -4679.03107269               | -2360.70461174              | 9.1                           | 10.2                          |
| -4682.47507980               | -2362.09987072              | 11.1                          | 12.4                          | -4679.03163754               | -2360.70517659              | 8.7                           | 10.1                          |
| -4992.29584886               | -2362.13451891              | -10.7                         | 8.6                           | -4988.45656909               | -2360.72882013              | -6.1                          | 13.1                          |
| -4992.30266822               | -2362.14133827              | -15.0                         | 3.5                           | -4988.45858943               | -2360.73084047              | -7.4                          | 11.1                          |
| -4992.30266775               | -2362.14133780              | -15.0                         | 3.5                           | -4988.45858953               | -2360.73084057              | -7.4                          | 11.1                          |
| -4992.30063693               | -2362.13930698              | -13.7                         | 4.1                           | -4988.45844205               | -2360.73069309              | -7.3                          | 10.5                          |
| -4992.30055643               | -2362.13922648              | -13.6                         | 5.8                           | -4988.45774391               | -2360.72999495              | -6.9                          | 12.5                          |
| -4992.30055659               | -2362.13922664              | -13.6                         | 5.8                           | -4988.45774363               | -2360.72999467              | -6.9                          | 12.5                          |
| -4992.28610058               | -2362.12477063              | -4.6                          | 14.5                          | -4988.44892493               | -2360.72117597              | -1.3                          | 17.8                          |
| -4992.28610050               | -2362.12477055              | -4.6                          | 14.5                          | -4988.44892492               | -2360.72117596              | -1.3                          | 17.8                          |
| -4992.29524444               | -2362.13391449              | -10.3                         | 10.1                          | -4988.45051381               | -2360.72276485              | -2.3                          | 18.1                          |
| -4992.33307614               | -2362.17174619              | -34.0                         | -16.1                         | -4988.50191476               | -2360.77416580              | -34.6                         | -16.6                         |
| -4992.33341996               | -2362.17209001              | -34.3                         | -15.7                         | -4988.50192258               | -2360.77417362              | -34.6                         | -16.0                         |
| -4992.32382908               | -2362.16249913              | -28.2                         | -8.1                          | -4988.49491398               | -2360.76716502              | -30.2                         | -10.0                         |
| -4992.28547747               | -2362.12414752              | -4.2                          | 12.8                          | -4988.44413553               | -2360.71638657              | 1.7                           | 18.7                          |
| -4992.28547095               | -2362.12414100              | -4.2                          | 13.6                          | -4988.44411767               | -2360.71636871              | 1.7                           | 19.4                          |
| -4992.30177785               | -2362.14044790              | -14.4                         | 6.6                           | -4988.45555405               | -2360.72780509              | -5.5                          | 15.5                          |

|                |                |       |       |                |                |       |       |
|----------------|----------------|-------|-------|----------------|----------------|-------|-------|
| -4992.29504212 | -2362.13371217 | -10.2 | 9.1   | -4988.44990015 | -2360.72215119 | -1.9  | 17.4  |
| -4992.29902117 | -2362.13769122 | -12.7 | 7.8   | -4988.45375328 | -2360.72600432 | -4.4  | 16.1  |
| -4992.29902127 | -2362.13769132 | -12.7 | 7.8   | -4988.45375338 | -2360.72600442 | -4.4  | 16.1  |
| -4992.29902122 | -2362.13769127 | -12.7 | 7.8   | -4988.45375326 | -2360.72600430 | -4.4  | 16.1  |
| -4992.27920335 | -2362.11787340 | -0.2  | 18.9  | -4988.43958747 | -2360.71183851 | 4.5   | 23.7  |
| -4992.29511033 | -2362.13378038 | -10.2 | 11.3  | -4988.44994906 | -2360.72220010 | -2.0  | 19.5  |
| -4992.27554793 | -2362.11421798 | 2.1   | 22.2  | -4988.43682845 | -2360.70907949 | 6.3   | 26.4  |
| -4992.27128282 | -2362.10995287 | 4.7   | 24.2  | -4988.43190028 | -2360.70415132 | 9.4   | 28.8  |
| -4992.33924927 | -2362.17791932 | -37.9 | -19.3 | -4988.50629584 | -2360.77854688 | -37.3 | -18.7 |
| -4992.33176795 | -2362.17043800 | -33.2 | -12.9 | -4988.49665871 | -2360.76890975 | -31.3 | -11.0 |
| -4992.28872524 | -2362.12739529 | -6.2  | 10.2  | -4988.45099450 | -2360.72324554 | -2.6  | 13.7  |
| -4992.29003748 | -2362.12870753 | -7.0  | 10.2  | -4988.45254696 | -2360.72479800 | -3.6  | 13.6  |
| -4992.29285904 | -2362.13152909 | -8.8  | 11.0  | -4988.45419026 | -2360.72644130 | -4.6  | 15.2  |
| -4992.29868181 | -2362.13735186 | -12.5 | 6.3   | -4988.45476242 | -2360.72701346 | -5.0  | 13.8  |
| -4992.29999437 | -2362.13866442 | -13.3 | 5.9   | -4988.45338778 | -2360.72563882 | -4.1  | 15.1  |
| -4992.29357754 | -2362.13224759 | -9.3  | 9.0   | -4988.45222110 | -2360.72447214 | -3.4  | 14.8  |
| -4992.28407140 | -2362.12274145 | -3.3  | 14.9  | -4988.44742441 | -2360.71967545 | -0.4  | 17.8  |
| -4992.28318208 | -2362.12185213 | -2.7  | 16.2  | -4988.44702418 | -2360.71927522 | -0.1  | 18.8  |
| -4992.28544888 | -2362.12411893 | -4.2  | 16.2  | -4988.44804601 | -2360.72029705 | -0.8  | 19.5  |
| -4992.28544875 | -2362.12411880 | -4.2  | 16.2  | -4988.44804595 | -2360.72029699 | -0.8  | 19.5  |
| -4992.29708987 | -2362.13575992 | -11.5 | 8.2   | -4988.45176370 | -2360.72401474 | -3.1  | 16.5  |
| -4992.29788417 | -2362.13655422 | -12.0 | 9.1   | -4988.45208615 | -2360.72433719 | -3.3  | 17.7  |
| -4992.29676812 | -2362.13543817 | -11.3 | 10.1  | -4988.45175505 | -2360.72400609 | -3.1  | 18.3  |
| -4992.33743508 | -2362.17610513 | -36.8 | -19.1 | -4988.50503421 | -2360.77728525 | -36.5 | -18.9 |
| -4992.31827702 | -2362.15694707 | -24.8 | -7.9  | -4988.49226555 | -2360.76451659 | -28.5 | -11.7 |
| -4992.32008420 | -2362.15875425 | -25.9 | -6.9  | -4988.49223747 | -2360.76448851 | -28.5 | -9.5  |
| -4992.31813818 | -2362.15680823 | -24.7 | -5.5  | -4988.49049779 | -2360.76274883 | -27.4 | -8.3  |
| -4992.32601546 | -2362.16468551 | -29.6 | -8.1  | -4988.49185016 | -2360.76410120 | -28.3 | -6.7  |
| -4992.30013663 | -2362.13880668 | -13.4 | 2.2   | -4988.46205321 | -2360.73430425 | -9.6  | 6.0   |
| -4992.28326853 | -2362.12193858 | -2.8  | 14.1  | -4988.44461235 | -2360.71686339 | 1.4   | 18.3  |
| -4992.29976449 | -2362.13843454 | -13.1 | 5.7   | -4988.45471671 | -2360.72696775 | -5.0  | 13.8  |
| -4992.27709722 | -2362.11576727 | 1.1   | 18.7  | -4988.43903019 | -2360.71128123 | 4.9   | 22.4  |
| -4992.29518701 | -2362.13385706 | -10.3 | 8.4   | -4988.45075016 | -2360.72300120 | -2.5  | 16.2  |
| -4992.29878614 | -2362.13745619 | -12.5 | 8.1   | -4988.45422058 | -2360.72647162 | -4.7  | 16.0  |
| -4992.29864407 | -2362.13731412 | -12.4 | 8.3   | -4988.45404615 | -2360.72629719 | -4.5  | 16.2  |
| -4992.27775258 | -2362.11642263 | 0.7   | 21.0  | -4988.44034497 | -2360.71259601 | 4.1   | 24.4  |
| -4992.29448468 | -2362.13315473 | -9.8  | 12.2  | -4988.45121626 | -2360.72346730 | -2.8  | 19.2  |
| -4992.26967090 | -2362.10834095 | 5.7   | 25.6  | -4988.43272178 | -2360.70497282 | 8.8   | 28.7  |
| -4992.33015563 | -2362.16882568 | -32.2 | -12.8 | -4988.49893339 | -2360.77118443 | -32.7 | -13.3 |
| -4992.33049576 | -2362.16916581 | -32.4 | -12.1 | -4988.49987406 | -2360.77212510 | -33.3 | -13.0 |
| -4992.31586160 | -2362.15453165 | -23.2 | -4.9  | -4988.48687826 | -2360.75912930 | -25.1 | -6.8  |
| -4992.31479007 | -2362.15346012 | -22.6 | -3.9  | -4988.48676831 | -2360.75901935 | -25.1 | -6.4  |
| -4992.33192533 | -2362.17059538 | -33.3 | -17.7 | -4988.50207232 | -2360.77432336 | -34.7 | -19.0 |
| -4992.33377868 | -2362.17244873 | -34.5 | -17.2 | -4988.50311926 | -2360.77537030 | -35.3 | -18.0 |
| -4992.32934295 | -2362.16801300 | -31.7 | -15.0 | -4988.49983752 | -2360.77208856 | -33.3 | -16.6 |
| -5832.11806960 | -2362.18578968 | -42.9 | -6.7  | -5827.54669293 | -2360.78183467 | -39.4 | -3.3  |
| -5832.11462784 | -2362.18234792 | -40.7 | -4.2  | -5827.54534837 | -2360.78049011 | -38.6 | -2.0  |
| -5832.11447861 | -2362.18219869 | -40.6 | -5.1  | -5827.54410304 | -2360.77924478 | -37.8 | -2.3  |
| -5832.11144880 | -2362.17916888 | -38.7 | -0.6  | -5827.54161102 | -2360.77675276 | -36.2 | 1.9   |
| -5832.10477013 | -2362.17249021 | -34.5 | 0.6   | -5827.52096736 | -2360.75610910 | -23.3 | 11.9  |
| -5832.10143625 | -2362.16915633 | -32.4 | 2.7   | -5827.51889605 | -2360.75403779 | -22.0 | 13.2  |
| -5832.10333487 | -2362.17105495 | -33.6 | 1.2   | -5827.52020318 | -2360.75534492 | -22.8 | 12.1  |
| -5832.10157794 | -2362.16929802 | -32.5 | 4.4   | -5827.51895341 | -2360.75409515 | -22.0 | 14.9  |
| -5832.08712196 | -2362.15484204 | -23.4 | 12.0  | -5827.50476178 | -2360.73990352 | -13.1 | 22.3  |
| -5832.08894247 | -2362.15666255 | -24.6 | 11.7  | -5827.50656449 | -2360.74170623 | -14.2 | 22.0  |
| -5832.11559801 | -2362.18331809 | -41.3 | -3.9  | -5827.53479288 | -2360.76993462 | -31.9 | 5.4   |
| -5832.10346598 | -2362.17118606 | -33.7 | 0.8   | -5827.52375299 | -2360.75889473 | -25.0 | 9.4   |

|                 |                |       |       |                |                |       |       |
|-----------------|----------------|-------|-------|----------------|----------------|-------|-------|
| -5832.10359822  | -2362.17131830 | -33.8 | 2.9   | -5827.52549046 | -2360.76063220 | -26.1 | 10.6  |
| <b>Figure 2</b> |                |       |       |                |                |       |       |
| -4360.47632744  | -2362.09165895 | 16.2  | 22.3  | -4358.12370978 | -2360.69690764 | 13.9  | 20.0  |
| -2180.22422384  | -2362.07771907 | 25.0  | 22.7  | -2179.05096916 | -2360.68602191 | 20.7  | 18.5  |
| -3003.15119932  | -2362.09037394 | 17.0  | 31.9  | -3001.00926782 | -2360.69562993 | 14.7  | 29.6  |
| -3003.15333331  | -2362.09250793 | 15.7  | 29.4  | -3001.01023197 | -2360.69659408 | 14.1  | 27.8  |
| -3003.17139069  | -2362.11056531 | 4.3   | 18.5  | -3001.03192144 | -2360.71828355 | 0.5   | 14.6  |
| -2358.46477953  | -2362.09829484 | 12.0  | 11.5  | -2357.08807640 | -2360.70976379 | 5.8   | 5.3   |
| -2802.31250457  | -2362.12363334 | -3.9  | 10.5  | -2800.37828378 | -2360.72722799 | -5.1  | 9.3   |
| -2802.29968020  | -2362.11080897 | 4.2   | 19.1  | -2800.36739959 | -2360.71634380 | 1.7   | 16.6  |
| -2802.33460888  | -2362.14573765 | -17.7 | -1.9  | -2800.41039155 | -2360.75933576 | -25.3 | -9.5  |
| -2802.33109962  | -2362.14222839 | -15.5 | 1.5   | -2800.40878043 | -2360.75772464 | -24.3 | -7.2  |
| -2802.33036803  | -2362.14149680 | -15.1 | 1.7   | -2800.40952158 | -2360.75846579 | -24.7 | -7.9  |
| -2802.29865247  | -2362.10978124 | 4.8   | 18.3  | -2800.37083910 | -2360.71978331 | -0.5  | 13.0  |
| -2802.33309542  | -2362.14422419 | -16.8 | -2.9  | -2800.40293277 | -2360.75187698 | -20.6 | -6.7  |
| -2802.31567483  | -2362.12680360 | -5.8  | 8.5   | -2800.38836940 | -2360.73731361 | -11.5 | 2.9   |
| -2802.31478250  | -2362.12591127 | -5.3  | 9.4   | -2800.38970037 | -2360.73864458 | -12.3 | 2.4   |
| -2802.30758077  | -2362.11870954 | -0.8  | 13.0  | -2800.38408841 | -2360.73303262 | -8.8  | 5.0   |
| -2802.30834457  | -2362.11947334 | -1.2  | 12.2  | -2800.38509692 | -2360.73404113 | -9.4  | 4.0   |
| -2802.30444251  | -2362.11557128 | 1.2   | 15.7  | -2800.38049305 | -2360.72943726 | -6.5  | 8.0   |
| -2802.30780607  | -2362.11893484 | -0.9  | 13.1  | -2800.38474254 | -2360.73368675 | -9.2  | 4.8   |
| -854.70137435   | -2362.11697420 | 0.3   | -0.8  | -853.67310338  | -2360.73259113 | -8.5  | -9.6  |
| -2802.32938681  | -2362.14051558 | -14.4 | -0.2  | -2800.40006752 | -2360.74901173 | -18.8 | -4.5  |
| -2802.30738774  | -2362.11851651 | -0.6  | 13.8  | -2800.37945364 | -2360.72839785 | -5.9  | 8.6   |
| -2802.34167989  | -2362.15280866 | -22.2 | -4.8  | -2800.42042163 | -2360.76936584 | -31.6 | -14.2 |
| -3642.13761855  | -2362.17779734 | -37.8 | -2.5  | -3639.47117103 | -2360.78300593 | -40.1 | -4.7  |
| -3642.13605384  | -2362.17623263 | -36.9 | -3.2  | -3639.47053199 | -2360.78236689 | -39.7 | -6.1  |
| -3642.13096741  | -2362.17114620 | -33.7 | -2.6  | -3639.45287975 | -2360.76471465 | -28.7 | 2.4   |
| -3642.12964829  | -2362.16982708 | -32.8 | 0.3   | -3639.45153742 | -2360.76337232 | -27.8 | 5.4   |
| -3642.14941236  | -2362.18959115 | -45.2 | -9.4  | -3639.47338682 | -2360.78522172 | -41.5 | -5.6  |
| -3642.14489779  | -2362.18507658 | -42.4 | -8.2  | -3639.46947171 | -2360.78130661 | -39.1 | -4.8  |
| -4360.47632744  | -2362.09165895 | 16.2  | 22.3  | -4358.12370978 | -2360.69690764 | 13.9  | 20.0  |
| -2180.22422384  | -2362.07771907 | 25.0  | 22.7  | -2179.05096916 | -2360.68602191 | 20.7  | 18.5  |
| -3003.15119932  | -2362.09037394 | 17.0  | 31.9  | -3001.00926782 | -2360.69562993 | 14.7  | 29.6  |
| -3003.15333331  | -2362.09250793 | 15.7  | 29.4  | -3001.01023197 | -2360.69659408 | 14.1  | 27.8  |
| -3003.17139069  | -2362.11056531 | 4.3   | 18.5  | -3001.03192144 | -2360.71828355 | 0.5   | 14.6  |
| -2358.46477953  | -2362.09829484 | 12.0  | 11.5  | -2357.08807640 | -2360.70976379 | 5.8   | 5.3   |
| -2668.28041145  | -2362.12780588 | -6.5  | 9.4   | -2666.51005975 | -2360.73045913 | -7.2  | 8.7   |
| -2668.27150585  | -2362.11890028 | -0.9  | 14.9  | -2666.50335902 | -2360.72375840 | -3.0  | 12.8  |
| -2668.30668156  | -2362.15407599 | -23.0 | -6.6  | -2666.54680865 | -2360.76720803 | -30.2 | -13.8 |
| -2668.30209438  | -2362.14948881 | -20.1 | -5.8  | -2666.54442894 | -2360.76482832 | -28.7 | -14.5 |
| -2668.30229726  | -2362.14969169 | -20.2 | -3.8  | -2666.54591207 | -2360.76631145 | -29.7 | -13.2 |
| -2668.27063968  | -2362.11803411 | -0.3  | 12.8  | -2666.50688012 | -2360.72727950 | -5.2  | 7.9   |
| -2668.29880893  | -2362.14620336 | -18.0 | -3.2  | -2666.53303311 | -2360.75343249 | -21.6 | -6.7  |
| -2668.28244941  | -2362.12984384 | -7.8  | 4.7   | -2666.51940988 | -2360.73980926 | -13.0 | -0.6  |
| -2668.27995858  | -2362.12735301 | -6.2  | 7.7   | -2666.51990862 | -2360.74030800 | -13.3 | 0.6   |
| -2668.27331006  | -2362.12070449 | -2.0  | 11.5  | -2666.51454815 | -2360.73494753 | -10.0 | 3.5   |
| -2668.27483588  | -2362.12223031 | -3.0  | 11.9  | -2666.51617545 | -2360.73657483 | -11.0 | 3.8   |
| -2668.27000979  | -2362.11740422 | 0.1   | 15.2  | -2666.51101507 | -2360.73141445 | -7.8  | 7.3   |
| -2668.27390089  | -2362.12129532 | -2.4  | 11.3  | -2666.51544353 | -2360.73584291 | -10.5 | 3.2   |
| -720.66376017   | -2362.11562568 | 1.2   | -0.6  | -719.80039546  | -2360.73133837 | -7.7  | -9.5  |
| -2668.29611377  | -2362.14350820 | -16.3 | -2.8  | -2666.53097202 | -2360.75137140 | -20.3 | -6.8  |
| -2668.27422873  | -2362.12162316 | -2.6  | 10.4  | -2666.51059750 | -2360.73099688 | -7.5  | 5.5   |
| -2668.31245107  | -2362.15984550 | -26.6 | -10.2 | -2666.55528575 | -2360.77568513 | -35.5 | -19.2 |

|                |                |       |       |                |                |       |       |
|----------------|----------------|-------|-------|----------------|----------------|-------|-------|
| -3508.10662325 | -2362.18306771 | -41.1 | -10.0 | -3505.60590644 | -2360.78919652 | -44.0 | -12.9 |
| -3508.10788525 | -2362.18432971 | -41.9 | -8.3  | -3505.60738202 | -2360.79067210 | -44.9 | -11.3 |
| -3508.10022092 | -2362.17666538 | -37.1 | -3.3  | -3505.58750639 | -2360.77079647 | -32.5 | 1.3   |
| -3508.09870330 | -2362.17514776 | -36.2 | -2.6  | -3505.58577727 | -2360.7696735  | -31.4 | 2.2   |
| -3508.11434739 | -2362.19079185 | -46.0 | -11.9 | -3505.60356916 | -2360.78685924 | -42.5 | -8.5  |
| -3508.11064984 | -2362.18709430 | -43.7 | -9.4  | -3505.60063489 | -2360.78392497 | -40.7 | -6.4  |
| -4360.47632744 | -2362.09165895 | 16.2  | 22.3  | -4358.12370978 | -2360.69690764 | 13.9  | 20.0  |
| -2180.22422384 | -2362.07771907 | 25.0  | 22.7  | -2179.05096916 | -2360.68602191 | 20.7  | 18.5  |
| -3003.15119932 | -2362.09037394 | 17.0  | 31.9  | -3001.00926782 | -2360.69562993 | 14.7  | 29.6  |
| -3003.15333331 | -2362.09250793 | 15.7  | 29.4  | -3001.01023197 | -2360.69659408 | 14.1  | 27.8  |
| -3003.17139069 | -2362.11056531 | 4.3   | 18.5  | -3001.03192144 | -2360.71828355 | 0.5   | 14.6  |
| -2358.46477953 | -2362.09829484 | 12.0  | 11.5  | -2357.08807640 | -2360.70976379 | 5.8   | 5.3   |
| -2896.27637605 | -2362.13201470 | -9.1  | 5.7   | -2894.25025225 | -2360.73413829 | -9.5  | 5.3   |
| -2896.27116845 | -2362.12680710 | -5.8  | 10.0  | -2894.24689297 | -2360.73077901 | -7.4  | 8.5   |
| -2896.30590006 | -2362.16153871 | -27.6 | -10.1 | -2894.29036869 | -2360.77425473 | -34.6 | -17.1 |
| -2896.30125774 | -2362.15689639 | -24.7 | -9.6  | -2894.28816483 | -2360.77205087 | -33.3 | -18.1 |
| -2896.30152330 | -2362.15716195 | -24.9 | -10.8 | -2894.28949316 | -2360.77337920 | -34.1 | -20.0 |
| -2896.27042754 | -2362.12606619 | -5.4  | 8.6   | -2894.25052059 | -2360.73440663 | -9.6  | 4.3   |
| -2896.29252383 | -2362.14816248 | -19.2 | -4.8  | -2894.27084415 | -2360.75473019 | -22.4 | -8.0  |
| -2896.27515251 | -2362.13079116 | -8.3  | 4.6   | -2894.25658153 | -2360.74046757 | -13.4 | -0.5  |
| -2896.27337967 | -2362.12901832 | -7.2  | 6.2   | -2894.25707477 | -2360.74096081 | -13.7 | -0.3  |
| -2896.26664726 | -2362.12228591 | -3.0  | 10.8  | -2894.25255286 | -2360.73643890 | -10.9 | 2.9   |
| -2896.26762923 | -2362.12326788 | -3.6  | 10.0  | -2894.25373451 | -2360.73762055 | -11.6 | 2.0   |
| -2896.26287815 | -2362.11851680 | -0.6  | 12.0  | -2894.24846473 | -2360.73235077 | -8.3  | 4.3   |
| -2896.26679722 | -2362.12243587 | -3.1  | 11.6  | -2894.25317564 | -2360.73706168 | -11.3 | 3.4   |
| -948.65494511  | -2362.11505483 | 1.5   | -0.8  | -947.53631151  | -2360.73074108 | -7.3  | -9.7  |
| -2896.28915655 | -2362.14479520 | -17.1 | -2.7  | -2894.26845970 | -2360.75234574 | -20.9 | -6.5  |
| -2896.26743242 | -2362.12307107 | -3.5  | 10.5  | -2894.24863787 | -2360.73252391 | -8.5  | 5.5   |
| -2896.30651376 | -2362.16215241 | -28.0 | -11.0 | -2894.29342692 | -2360.77731296 | -36.6 | -19.5 |
| -3736.10684488 | -2362.19153355 | -46.5 | -13.4 | -3733.34977682 | -2360.79655356 | -48.6 | -15.6 |
| -3736.10555637 | -2362.19024504 | -45.7 | -12.1 | -3733.34947793 | -2360.79625467 | -48.4 | -14.9 |
| -3736.09402901 | -2362.17871768 | -38.4 | -6.4  | -3733.32575966 | -2360.77253640 | -33.6 | -1.6  |
| -3736.09103472 | -2362.17572339 | -36.5 | -5.2  | -3733.32367873 | -2360.77045547 | -32.3 | -0.9  |
| -3736.10963726 | -2362.19432593 | -48.2 | -13.0 | -3733.34346873 | -2360.79024547 | -44.7 | -9.5  |
| -3736.10527829 | -2362.18996696 | -45.5 | -10.0 | -3733.33912217 | -2360.78589891 | -41.9 | -6.5  |

Figure 3

|                |                |       |      |                |                |       |      |
|----------------|----------------|-------|------|----------------|----------------|-------|------|
| -4670.57063203 | -2362.08239004 | 22.0  | 27.4 | -4668.32094893 | -2360.68931295 | 18.7  | 24.1 |
| -2335.26533567 | -2362.06240969 | 34.6  | 33.1 | -2334.14321579 | -2360.67205428 | 29.5  | 28.0 |
| -3158.19402668 | -2362.07678009 | 25.5  | 39.3 | -3156.10574755 | -2360.68589540 | 20.8  | 34.5 |
| -3158.19516744 | -2362.07792085 | 24.8  | 38.0 | -3156.10260300 | -2360.68275085 | 22.8  | 35.9 |
| -3158.21604175 | -2362.09879516 | 11.7  | 25.3 | -3156.12682880 | -2360.70697665 | 7.6   | 21.2 |
| -2513.50791312 | -2362.08500722 | 20.4  | 17.9 | -2512.18201965 | -2360.69749278 | 13.5  | 11.0 |
| -2957.36020975 | -2362.11491731 | 1.6   | 16.4 | -2955.47656294 | -2360.71929289 | -0.1  | 14.6 |
| -2957.34052133 | -2362.09522889 | 14.0  | 29.2 | -2955.45962540 | -2360.70235535 | 10.5  | 25.7 |
| -2957.37693803 | -2362.13164559 | -8.9  | 8.4  | -2955.50376269 | -2360.74649264 | -17.2 | 0.1  |
| -2957.37338588 | -2362.12809344 | -6.7  | 8.7  | -2955.50186761 | -2360.74459756 | -16.0 | -0.6 |
| -2957.37643921 | -2362.13114677 | -8.6  | 5.5  | -2955.50479459 | -2360.74752454 | -17.9 | -3.8 |
| -2957.33915972 | -2362.09386728 | 14.8  | 26.4 | -2955.46277502 | -2360.70550497 | 8.5   | 20.1 |
| -2957.37874277 | -2362.13345033 | -10.0 | 3.2  | -2955.49959647 | -2360.74232642 | -14.6 | -1.4 |
| -2957.36103444 | -2362.11574200 | 1.1   | 13.9 | -2955.48510984 | -2360.72783979 | -5.5  | 7.3  |
| -2957.35884269 | -2362.11355025 | 2.5   | 15.6 | -2955.48566499 | -2360.72839494 | -5.9  | 7.3  |
| -2957.34872400 | -2362.10343156 | 8.8   | 21.6 | -2955.47618990 | -2360.71891985 | 0.1   | 12.8 |
| -2957.35319728 | -2362.10790484 | 6.0   | 20.5 | -2955.48068042 | -2360.72341037 | -2.7  | 11.7 |
| -2957.34888001 | -2362.10358757 | 8.7   | 21.6 | -2955.47594816 | -2360.71867811 | 0.2   | 13.1 |

|                |                |       |      |                |                |       |       |
|----------------|----------------|-------|------|----------------|----------------|-------|-------|
| -2957.35246723 | -2362.10717479 | 6.5   | 20.1 | -2955.48010840 | -2360.72283835 | -2.4  | 11.2  |
| -854.70137435  | -2362.10244288 | 9.4   | 7.0  | -853.67310338  | -2360.71941153 | -0.2  | -2.7  |
| -2957.37583509 | -2362.13054265 | -8.2  | 4.5  | -2955.49680028 | -2360.73953023 | -12.8 | -0.1  |
| -2957.34868388 | -2362.10339144 | 8.8   | 21.2 | -2955.47188254 | -2360.71461249 | 2.8   | 15.1  |
| -2957.38848904 | -2362.14319660 | -16.1 | -0.3 | -2955.51753094 | -2360.76026089 | -25.9 | -10.0 |
| -3797.17954175 | -2362.16329934 | -28.7 | 2.8  | -3794.56493617 | -2360.77055682 | -32.3 | -0.8  |
| -3797.18421057 | -2362.16796816 | -31.7 | 2.1  | -3794.56688922 | -2360.77250987 | -33.5 | 0.2   |
| -3797.17091601 | -2362.15467360 | -23.3 | 8.0  | -3794.54309459 | -2360.74871524 | -18.6 | 12.7  |
| -3797.17574877 | -2362.15950636 | -26.4 | 6.2  | -3794.54563290 | -2360.75125355 | -20.2 | 12.4  |
| -3797.19424206 | -2362.17799965 | -38.0 | -4.4 | -3794.56646953 | -2360.77209018 | -33.3 | 0.2   |
| -3797.18948531 | -2362.17324290 | -35.0 | -2.3 | -3794.56301189 | -2360.76863254 | -31.1 | 1.6   |
| -4670.57063203 | -2362.08239004 | 22.0  | 27.4 | -4668.32094893 | -2360.68931295 | 18.7  | 24.1  |
| -2335.26533567 | -2362.06240969 | 34.6  | 33.1 | -2334.14321579 | -2360.67205428 | 29.5  | 28.0  |
| -3158.19402668 | -2362.07678009 | 25.5  | 39.3 | -3156.10574755 | -2360.68589540 | 20.8  | 34.5  |
| -3158.19516744 | -2362.07792085 | 24.8  | 38.0 | -3156.10260300 | -2360.68275085 | 22.8  | 35.9  |
| -3158.21604175 | -2362.09879516 | 11.7  | 25.3 | -3156.12682880 | -2360.70697665 | 7.6   | 21.2  |
| -2513.50791312 | -2362.08500722 | 20.4  | 17.9 | -2512.18201965 | -2360.69749278 | 13.5  | 11.0  |
| -2823.32762627 | -2362.11859950 | -0.7  | 13.2 | -2821.60824422 | -2360.72242934 | -2.1  | 11.8  |
| -2823.31325039 | -2362.10422362 | 8.3   | 22.5 | -2821.59612136 | -2360.71030648 | 5.5   | 19.7  |
| -2823.34795525 | -2362.13892848 | -13.5 | 2.5  | -2821.63907662 | -2360.75326174 | -21.5 | -5.5  |
| -2823.34426446 | -2362.13523769 | -11.1 | 2.4  | -2821.63758963 | -2360.75177475 | -20.5 | -7.0  |
| -2823.34753047 | -2362.13850370 | -13.2 | 1.0  | -2821.64035280 | -2360.75453792 | -22.3 | -8.1  |
| -2823.31142514 | -2362.10239837 | 9.5   | 20.1 | -2821.59890418 | -2360.71308930 | 3.7   | 14.4  |
| -2823.34415674 | -2362.13512997 | -11.1 | 0.9  | -2821.62924844 | -2360.74343356 | -15.3 | -3.4  |
| -2823.32628260 | -2362.11725583 | 0.1   | 11.1 | -2821.61489069 | -2360.72907581 | -6.3  | 4.7   |
| -2823.32355924 | -2362.11453247 | 1.9   | 14.0 | -2821.61497660 | -2360.72916172 | -6.3  | 5.8   |
| -2823.31453913 | -2362.10551236 | 7.5   | 19.9 | -2821.60665638 | -2360.72084150 | -1.1  | 11.3  |
| -2823.31879975 | -2362.10977298 | 4.8   | 16.7 | -2821.61096434 | -2360.72514946 | -3.8  | 8.0   |
| -2823.31407406 | -2362.10504729 | 7.8   | 21.0 | -2821.60596612 | -2360.72015124 | -0.7  | 12.5  |
| -2823.31840707 | -2362.10938030 | 5.1   | 18.6 | -2821.61067973 | -2360.72486485 | -3.6  | 9.8   |
| -720.66376017  | -2362.10109437 | 10.3  | 7.2  | -719.80039546  | -2360.71815878 | 0.6   | -2.6  |
| -2823.34101367 | -2362.13198690 | -9.1  | 2.5  | -2821.62637719 | -2360.74056231 | -13.5 | -1.9  |
| -2823.31547557 | -2362.10644880 | 6.9   | 19.2 | -2821.60333376 | -2360.71751888 | 1.0   | 13.2  |
| -2823.35651056 | -2362.14748379 | -18.8 | -3.8 | -2821.64922201 | -2360.76340713 | -27.8 | -12.8 |
| -3663.15445572 | -2362.17447897 | -35.8 | -3.9 | -3660.70223804 | -2360.77931386 | -37.8 | -6.0  |
| -3663.15048717 | -2362.17051042 | -33.3 | 0.7  | -3660.70079317 | -2360.77786899 | -36.9 | -2.9  |
| -3663.13961990 | -2362.15964315 | -26.4 | 4.4  | -3660.67767942 | -2360.75475524 | -22.4 | 8.5   |
| -3663.14226293 | -2362.16228618 | -28.1 | 3.8  | -3660.67710061 | -2360.75417643 | -22.0 | 9.9   |
| -3663.15870065 | -2362.17872390 | -38.4 | -5.2 | -3660.69651658 | -2360.77359240 | -34.2 | -1.0  |
| -3663.15173689 | -2362.17176014 | -34.1 | -1.5 | -3660.69226675 | -2360.76934257 | -31.6 | 0.9   |
| -4670.57063203 | -2362.08239004 | 22.0  | 27.4 | -4668.32094893 | -2360.68931295 | 18.7  | 24.1  |
| -2335.26533567 | -2362.06240969 | 34.6  | 33.1 | -2334.14321579 | -2360.67205428 | 29.5  | 28.0  |
| -3158.19402668 | -2362.07678009 | 25.5  | 39.3 | -3156.10574755 | -2360.68589540 | 20.8  | 34.5  |
| -3158.19516744 | -2362.07792085 | 24.8  | 38.0 | -3156.10260300 | -2360.68275085 | 22.8  | 35.9  |
| -3158.21604175 | -2362.09879516 | 11.7  | 25.3 | -3156.12682880 | -2360.70697665 | 7.6   | 21.2  |
| -2513.50791312 | -2362.08500722 | 20.4  | 17.9 | -2512.18201965 | -2360.69749278 | 13.5  | 11.0  |
| -3051.32290424 | -2362.12212168 | -2.9  | 11.6 | -3049.34748156 | -2360.72515334 | -3.8  | 10.6  |
| -3051.31389720 | -2362.11311464 | 2.7   | 17.3 | -3049.34048350 | -2360.71815528 | 0.6   | 15.1  |
| -3051.34707438 | -2362.14629182 | -18.1 | -1.1 | -3049.38283108 | -2360.76050286 | -26.0 | -9.0  |
| -3051.34266798 | -2362.14188542 | -15.3 | -0.3 | -3049.38058903 | -2360.75826081 | -24.6 | -9.6  |
| -3051.34560278 | -2362.14482022 | -17.1 | -2.7 | -3049.38311052 | -2360.76078230 | -26.2 | -11.8 |
| -3051.31131502 | -2362.11053246 | 4.4   | 16.6 | -3049.34247635 | -2360.72014813 | -0.7  | 11.5  |
| -3051.33694970 | -2362.13616714 | -11.7 | 1.1  | -3049.36644434 | -2360.74411612 | -15.7 | -2.9  |
| -3051.32001556 | -2362.11923300 | -1.1  | 11.0 | -3049.35282087 | -2360.73049265 | -7.2  | 5.0   |
| -3051.31680607 | -2362.11602351 | 0.9   | 13.2 | -3049.35250206 | -2360.73017384 | -7.0  | 5.3   |

|                |                |       |      |                |                |       |       |
|----------------|----------------|-------|------|----------------|----------------|-------|-------|
| -3051.30726807 | -2362.10648551 | 6.9   | 19.6 | -3049.34398378 | -2360.72165556 | -1.6  | 11.1  |
| -3051.31228524 | -2362.11150268 | 3.8   | 16.9 | -3049.34915261 | -2360.72682439 | -4.9  | 8.3   |
| -3051.30727917 | -2362.10649661 | 6.9   | 20.5 | -3049.34385068 | -2360.72152246 | -1.5  | 12.1  |
| -3051.31135333 | -2362.11057077 | 4.3   | 17.0 | -3049.34845888 | -2360.72613066 | -4.4  | 8.2   |
| -948.65494511  | -2362.10052352 | 10.6  | 6.9  | -947.53631151  | -2360.71756149 | 0.9   | -2.8  |
| -3051.33406539 | -2362.13328283 | -9.9  | 4.0  | -3049.36377539 | -2360.74144717 | -14.1 | -0.1  |
| -3051.30808910 | -2362.10730654 | 6.4   | 19.6 | -3049.34032878 | -2360.71800056 | 0.7   | 13.9  |
| -3051.35014839 | -2362.14936583 | -20.0 | -5.5 | -3049.38825641 | -2360.76592819 | -29.4 | -14.9 |
| -3891.15266145 | -2362.18092892 | -39.8 | -6.5 | -3888.44531453 | -2360.78587701 | -41.9 | -8.6  |
| -3891.14841598 | -2362.17668345 | -37.1 | -3.6 | -3888.44312299 | -2360.78368547 | -40.6 | -7.0  |
| -3891.13384232 | -2362.16210979 | -28.0 | 3.5  | -3888.41598775 | -2360.75655023 | -23.5 | 8.0   |
| -3891.13718580 | -2362.16545327 | -30.1 | 2.2  | -3888.41676487 | -2360.75732735 | -24.0 | 8.2   |
| -3891.15284365 | -2362.18111112 | -39.9 | -5.6 | -3888.43520983 | -2360.77577231 | -35.6 | -1.2  |
| -3891.14480071 | -2362.17306818 | -34.9 | -2.1 | -3888.43012379 | -2360.77068627 | -32.4 | 0.4   |

Figure 4

|                |                |       |      |                |                |       |      |
|----------------|----------------|-------|------|----------------|----------------|-------|------|
| -2317.86425799 | -2362.04797225 | 43.6  | 42.2 | -2316.51382701 | -2360.65573719 | 39.7  | 38.3 |
| -3140.79680578 | -2362.06619943 | 32.2  | 47.0 | -3138.47699289 | -2360.67021244 | 30.6  | 45.4 |
| -3140.79902799 | -2362.06842164 | 30.8  | 46.5 | -3138.47811300 | -2360.67133255 | 29.9  | 45.6 |
| -3140.81445072 | -2362.08384437 | 21.1  | 36.3 | -3138.49695665 | -2360.69017620 | 18.1  | 33.3 |
| -2496.10730110 | -2362.07103544 | 29.2  | 29.5 | -2494.55400936 | -2360.68255419 | 22.9  | 23.2 |
| -2939.96726730 | -2362.10861510 | 5.6   | 24.5 | -2937.85385387 | -2360.70965552 | 5.9   | 24.8 |
| -2939.95966468 | -2362.10101248 | 10.3  | 29.1 | -2937.84695018 | -2360.70275183 | 10.2  | 29.0 |
| -2939.94900482 | -2362.09035262 | 17.0  | 33.4 | -2937.84010006 | -2360.69590171 | 14.5  | 30.9 |
| -2939.98049523 | -2362.12184303 | -2.7  | 17.5 | -2937.87742763 | -2360.73322928 | -8.9  | 11.3 |
| -2939.97994238 | -2362.12129018 | -2.4  | 17.1 | -2937.87788576 | -2360.73368741 | -9.2  | 10.3 |
| -2939.98107215 | -2362.12241995 | -3.1  | 15.4 | -2937.87946080 | -2360.73526245 | -10.2 | 8.3  |
| -2939.95748522 | -2362.09883302 | 11.7  | 27.5 | -2937.84898712 | -2360.70478877 | 9.0   | 24.7 |
| -2939.98094644 | -2362.12229424 | -3.0  | 12.9 | -2937.87238035 | -2360.72818200 | -5.7  | 10.2 |
| -854.70137435  | -2362.08701130 | 19.1  | 18.2 | -853.67310338  | -2360.70290149 | 10.1  | 9.2  |
| -3779.77981729 | -2362.15021511 | -20.5 | 14.0 | -3776.93843114 | -2360.75712348 | -23.9 | 10.6 |
| -3779.78739730 | -2362.15779512 | -25.3 | 12.1 | -3776.94249159 | -2360.76118393 | -26.4 | 11.0 |
| -3779.76616804 | -2362.13656586 | -12.0 | 20.2 | -3776.91061422 | -2360.72930656 | -6.4  | 25.7 |
| -3779.76561310 | -2362.13601092 | -11.6 | 20.6 | -3776.91106822 | -2360.72976056 | -6.7  | 25.5 |
| -3779.77265969 | -2362.14305751 | -16.0 | 19.7 | -3776.91467739 | -2360.73336973 | -9.0  | 26.8 |
| -3779.76627667 | -2362.13667449 | -12.0 | 23.9 | -3776.91130205 | -2360.72999439 | -6.9  | 29.1 |
| -3779.77126668 | -2362.14166450 | -15.2 | 17.4 | -3776.92080997 | -2360.73950231 | -12.8 | 19.7 |
| -3779.77952728 | -2362.14992510 | -20.4 | 16.4 | -3776.92526825 | -2360.74396059 | -15.6 | 21.1 |
| -2183.82604476 | -2362.04602468 | 44.8  | 42.9 | -2182.64042804 | -2360.65379340 | 41.0  | 39.0 |
| -3006.76059970 | -2362.06625901 | 32.1  | 47.7 | -3004.60508706 | -2360.66976178 | 30.9  | 46.5 |
| -3006.76207419 | -2362.06773350 | 31.2  | 47.4 | -3004.60577282 | -2360.67044754 | 30.5  | 46.7 |
| -3006.77879693 | -2362.08445624 | 20.7  | 35.2 | -3004.62564132 | -2360.69031604 | 18.0  | 32.5 |
| -2362.06892991 | -2362.06892991 | 30.5  | 28.7 | -2360.68065789 | -2360.68065789 | 24.1  | 22.3 |
| -2671.89519110 | -2362.10907023 | 5.3   | 22.6 | -2670.11193861 | -2360.71065060 | 5.3   | 22.6 |
| -2671.89041125 | -2362.10429038 | 8.3   | 25.1 | -2670.10787206 | -2360.70658405 | 7.8   | 24.6 |
| -2671.88504031 | -2362.09891944 | 11.7  | 28.6 | -2670.10495203 | -2360.70366402 | 9.7   | 26.6 |
| -2671.90819225 | -2362.12207138 | -2.9  | 13.5 | -2670.13593661 | -2360.73464860 | -9.8  | 6.6  |
| -2671.90681835 | -2362.12069748 | -2.0  | 13.9 | -2670.13613432 | -2360.73484631 | -9.9  | 6.0  |
| -2671.90851295 | -2362.12239208 | -3.1  | 12.7 | -2670.13779126 | -2360.73650325 | -10.9 | 4.8  |
| -2671.88736165 | -2362.10124078 | 10.2  | 23.8 | -2670.10897233 | -2360.70768432 | 7.1   | 20.7 |
| -2671.90471497 | -2362.11859410 | -0.7  | 14.7 | -2670.12656454 | -2360.72527653 | -3.9  | 11.5 |
| -720.66376017  | -2362.08299845 | 21.6  | 19.2 | -719.80039546  | -2360.69923113 | 12.4  | 10.0 |
| -3511.71396340 | -2362.15689255 | -24.7 | 8.8  | -3509.20191096 | -2360.76351364 | -27.9 | 5.6  |
| -3511.71694476 | -2362.15987391 | -26.6 | 9.9  | -3509.20295397 | -2360.76455665 | -28.6 | 8.0  |
| -3511.69234467 | -2362.13527382 | -11.2 | 21.9 | -3509.16810666 | -2360.72970934 | -6.7  | 26.4 |

|                |                |       |      |                |                |       |      |
|----------------|----------------|-------|------|----------------|----------------|-------|------|
| -3511.69155879 | -2362.13448794 | -10.7 | 22.7 | -3509.16667900 | -2360.72828168 | -5.8  | 27.6 |
| -3511.69553510 | -2362.13846425 | -13.2 | 21.8 | -3509.16919391 | -2360.73079659 | -7.4  | 27.6 |
| -3511.68920320 | -2362.13213235 | -9.2  | 24.6 | -3509.16528831 | -2360.72689099 | -4.9  | 28.9 |
| -3511.69316069 | -2362.13608984 | -11.7 | 21.7 | -3509.17341982 | -2360.73502250 | -10.0 | 23.4 |
| -3511.69747061 | -2362.14039976 | -14.4 | 20.5 | -3509.17488747 | -2360.73649015 | -10.9 | 24.0 |
| -2411.81534783 | -2362.04357197 | 46.4  | 44.7 | -2410.37482365 | -2360.65167567 | 42.3  | 40.6 |
| -3234.75354776 | -2362.06745129 | 31.4  | 48.7 | -3232.34181043 | -2360.66997181 | 30.8  | 48.1 |
| -3234.75626346 | -2362.07016699 | 29.7  | 46.1 | -3232.34296949 | -2360.67113087 | 30.1  | 46.5 |
| -3234.76414882 | -2362.07805235 | 24.7  | 39.0 | -3232.35365484 | -2360.68181622 | 23.4  | 37.6 |
| -2590.06082504 | -2362.06906926 | 30.4  | 30.6 | -2588.41694708 | -2360.68043374 | 24.2  | 24.4 |
| -3127.88785672 | -2362.11822428 | -0.5  | 17.6 | -3125.59228059 | -2360.71796590 | 0.7   | 18.7 |
| -3127.88463210 | -2362.11499966 | 1.6   | 19.6 | -3125.59020366 | -2360.71588897 | 2.0   | 20.1 |
| -3127.87516281 | -2362.10553037 | 7.5   | 22.2 | -3125.58366942 | -2360.70935473 | 6.1   | 20.8 |
| -3127.90086739 | -2362.13123495 | -8.6  | 11.6 | -3125.61695965 | -2360.74264496 | -14.8 | 5.4  |
| -3127.89971028 | -2362.13007784 | -7.9  | 9.6  | -3125.61716309 | -2360.74284840 | -14.9 | 2.6  |
| -3127.89835685 | -2362.12872441 | -7.0  | 10.7 | -3125.61725887 | -2360.74294418 | -15.0 | 2.8  |
| -3127.88063840 | -2362.11100596 | 4.1   | 19.9 | -3125.59016947 | -2360.71585478 | 2.0   | 17.8 |
| -3127.89439788 | -2362.12476544 | -4.6  | 13.1 | -3125.60388559 | -2360.72957090 | -6.6  | 11.0 |
| -948.65494511  | -2362.08251995 | 21.9  | 19.0 | -947.53631151  | -2360.69842637 | 12.9  | 10.0 |
| -3967.70364194 | -2362.16305953 | -28.6 | 4.4  | -3964.68048915 | -2360.76906515 | -31.4 | 1.6  |
| -3967.70820957 | -2362.16762716 | -31.5 | 5.7  | -3964.68238315 | -2360.77095915 | -32.6 | 4.6  |
| -3967.67759485 | -2362.13701244 | -12.2 | 19.4 | -3964.64230992 | -2360.73088592 | -7.4  | 24.3 |
| -3967.67709745 | -2362.13651504 | -11.9 | 21.8 | -3964.64126905 | -2360.72984505 | -6.8  | 27.0 |
| -3967.68169211 | -2362.14110970 | -14.8 | 20.2 | -3964.64463257 | -2360.73320857 | -8.9  | 26.1 |
| -3967.67436652 | -2362.13378411 | -10.2 | 23.8 | -3964.63937302 | -2360.72794902 | -5.6  | 28.5 |
| -3967.68414030 | -2362.14355789 | -16.4 | 18.4 | -3964.65257835 | -2360.74115435 | -13.9 | 20.9 |
| -3967.68260189 | -2362.14201948 | -15.4 | 19.3 | -3964.64895594 | -2360.73753194 | -11.6 | 23.1 |

Figure 5

|                |                |       |      |                |                |       |      |
|----------------|----------------|-------|------|----------------|----------------|-------|------|
| -2106.57730947 | -2362.02642498 | 57.1  | 55.7 | -2105.50691500 | -2360.63957504 | 49.9  | 48.4 |
| -2929.50135186 | -2362.03614676 | 51.0  | 64.8 | -2927.46687234 | -2360.65084175 | 42.8  | 56.6 |
| -2929.50263869 | -2362.03743359 | 50.2  | 64.5 | -2927.46437544 | -2360.64834485 | 44.4  | 58.7 |
| -2929.54423314 | -2362.07902804 | 24.1  | 38.7 | -2927.50398092 | -2360.68795033 | 19.5  | 34.1 |
| -2284.83402203 | -2362.06315762 | 34.1  | 32.8 | -2283.55777781 | -2360.67707250 | 26.3  | 25.0 |
| -2594.64152253 | -2362.08453725 | 20.7  | 33.9 | -2592.97416006 | -2360.69216673 | 16.9  | 30.1 |
| -2594.61915451 | -2362.06216923 | 34.7  | 48.5 | -2592.95483229 | -2360.67283896 | 29.0  | 42.8 |
| -2594.66515284 | -2362.10816756 | 5.9   | 21.0 | -2593.00804461 | -2360.72605128 | -4.4  | 10.8 |
| -2594.66403664 | -2362.10705136 | 6.6   | 21.4 | -2593.00786385 | -2360.72587052 | -4.3  | 10.6 |
| -2594.66592945 | -2362.10894417 | 5.4   | 20.2 | -2593.00978957 | -2360.72779624 | -5.5  | 9.3  |
| -2594.61972596 | -2362.06274068 | 34.4  | 46.0 | -2592.95977277 | -2360.67777944 | 25.9  | 37.6 |
| -2594.65942893 | -2362.10244365 | 9.4   | 21.8 | -2592.99675033 | -2360.71475700 | 2.7   | 15.0 |
| -3434.46899737 | -2362.14106211 | -14.8 | 16.3 | -3432.06952210 | -2360.75041947 | -19.7 | 11.4 |
| -3434.45679998 | -2362.12886472 | -7.1  | 25.0 | -3432.04352414 | -2360.72442151 | -3.4  | 28.8 |
| -3434.45653368 | -2362.12859842 | -7.0  | 26.5 | -3432.04470461 | -2360.72560198 | -4.1  | 29.4 |
| -3434.48864004 | -2362.16070478 | -27.1 | 5.7  | -3432.07690280 | -2360.75780017 | -24.3 | 8.5  |

Figure 8

|                |                |      |      |                |                |      |      |
|----------------|----------------|------|------|----------------|----------------|------|------|
| -4504.24272347 | -1874.08139352 | 0.0  | 0.0  | -4501.00064360 | -1873.27289464 | 0.0  | 0.0  |
| -2317.86425799 | -1874.04187145 | 24.8 | 24.6 | -2316.51382701 | -1873.24108383 | 20.0 | 19.7 |
| -4635.77729512 | -1874.06626102 | 9.5  | 18.3 | -4633.07287230 | -1873.26369297 | 5.8  | 14.6 |
| -4635.77947613 | -1874.06735153 | 8.8  | 18.1 | -4633.07158142 | -1873.26304753 | 6.2  | 15.5 |
| -4504.24272347 | -1874.08139352 | 0.0  | 0.0  | -4501.00064360 | -1873.27289464 | 0.0  | 0.0  |
| -2183.82604476 | -1874.03992389 | 26.0 | 25.3 | -2182.64042804 | -1873.23914003 | 21.2 | 20.4 |

|                |                |      |      |                |                |      |      |
|----------------|----------------|------|------|----------------|----------------|------|------|
| -4367.70685388 | -1874.06730607 | 8.8  | 17.7 | -4365.33180070 | -1873.26461234 | 5.2  | 14.1 |
| -4367.70750636 | -1874.06763231 | 8.6  | 17.3 | -4365.32964724 | -1873.26353561 | 5.9  | 14.5 |
| -4504.24272347 | -1874.08139352 | 0.0  | 0.0  | -4501.00064360 | -1873.27289464 | 0.0  | 0.0  |
| -2411.81534783 | -1874.03747117 | 27.6 | 27.1 | -2410.37482365 | -1873.23702230 | 22.5 | 22.0 |
| -4823.69240369 | -1874.06832519 | 8.2  | 16.4 | -4820.80616522 | -1873.26528126 | 4.8  | 13.0 |
| -4823.69463838 | -1874.06944253 | 7.5  | 16.9 | -4820.80454925 | -1873.26447327 | 5.3  | 14.7 |

**Figure 9**

|                |                |       |       |                |                |       |      |
|----------------|----------------|-------|-------|----------------|----------------|-------|------|
| -2107.32249855 | -2107.32249855 | 0.0   | 0.0   | -2106.23819998 | -2106.23819998 | 0.0   | 0.0  |
| -2551.15059130 | -2107.32820476 | -3.6  | 12.3  | -2549.50982555 | -2106.23708237 | 0.7   | 16.6 |
| -2551.14967990 | -2107.32729336 | -3.0  | 14.1  | -2549.50919594 | -2106.23645276 | 1.1   | 18.2 |
| -2107.32249855 | -2107.32249855 | 0.0   | 0.0   | -2106.23819998 | -2106.23819998 | 0.0   | 0.0  |
| -2417.11868149 | -2107.33256062 | -6.3  | 10.2  | -2415.64188390 | -2106.24059589 | -1.5  | 15.0 |
| -2417.11819512 | -2107.33207425 | -6.0  | 10.6  | -2415.64149686 | -2106.24020885 | -1.3  | 15.4 |
| -2107.32249855 | -2107.32249855 | 0.0   | 0.0   | -2106.23819998 | -2106.23819998 | 0.0   | 0.0  |
| -2645.11357152 | -2107.33569486 | -8.3  | 6.8   | -2643.38079020 | -2106.24298885 | -3.0  | 12.1 |
| -2645.11408878 | -2107.33621212 | -8.6  | 9.1   | -2643.38101249 | -2106.24321114 | -3.1  | 14.6 |
| -2269.56973253 | -2269.56973253 | 0.0   | 0.0   | -2268.37991415 | -2268.37991415 | 0.0   | 0.0  |
| -2713.43607990 | -2269.61369336 | -27.6 | -9.7  | -2711.69159394 | -2268.41885076 | -24.4 | -6.5 |
| -2713.43607997 | -2269.61369343 | -27.6 | -9.7  | -2711.69159394 | -2268.41885076 | -24.4 | -6.5 |
| -2269.56973253 | -2269.56973253 | 0.0   | 0.0   | -2268.37991415 | -2268.37991415 | 0.0   | 0.0  |
| -2579.40166003 | -2269.61553916 | -28.7 | -12.0 | -2577.82151905 | -2268.42023104 | -25.3 | -8.6 |
| -2579.40168939 | -2269.61556852 | -28.8 | -12.0 | -2577.82155579 | -2268.42026778 | -25.3 | -8.5 |
| -2269.56973253 | -2269.56973253 | 0.0   | 0.0   | -2268.37991415 | -2268.37991415 | 0.0   | 0.0  |
| -2807.39508278 | -2269.61720612 | -29.8 | -11.4 | -2805.55919117 | -2268.42138982 | -26.0 | -7.6 |
| -2807.39508278 | -2269.61720612 | -29.8 | -11.4 | -2805.55919115 | -2268.42138980 | -26.0 | -7.6 |

**Figure 10**

|                |                |       |      |                |                |      |      |
|----------------|----------------|-------|------|----------------|----------------|------|------|
| -2076.29051321 | -2916.06146318 | 0.0   | 0.0  | -2075.32688262 | -2914.36399192 | 0.0  | 0.0  |
| -2076.28285776 | -2916.05380773 | 4.8   | 4.1  | -2075.31964647 | -2914.35675577 | 4.5  | 3.8  |
| -2076.27556408 | -2916.04651405 | 9.4   | 8.4  | -2075.31366831 | -2914.35077761 | 8.3  | 7.4  |
| -2076.26727150 | -2916.03822147 | 14.6  | 14.3 | -2075.30732176 | -2914.34443106 | 12.3 | 12.0 |
| -2916.07385107 | -2916.07385107 | -7.8  | 7.1  | -2914.35852097 | -2914.35852097 | 3.4  | 18.3 |
| -2916.07390160 | -2916.07390160 | -7.8  | 7.1  | -2914.35849217 | -2914.35849217 | 3.5  | 18.4 |
| -2916.07286877 | -2916.07286877 | -7.2  | 7.0  | -2914.35740160 | -2914.35740160 | 4.1  | 18.3 |
| -2916.07118284 | -2916.07118284 | -6.1  | 8.9  | -2914.35564557 | -2914.35564557 | 5.2  | 20.2 |
| -2916.06922963 | -2916.06922963 | -4.9  | 8.9  | -2914.35384506 | -2914.35384506 | 6.4  | 20.1 |
| -2916.06943639 | -2916.06943639 | -5.0  | 9.4  | -2914.35407459 | -2914.35407459 | 6.2  | 20.6 |
| -2916.06868455 | -2916.06868455 | -4.5  | 9.2  | -2914.35286293 | -2914.35286293 | 7.0  | 20.7 |
| -2916.06846090 | -2916.06846090 | -4.4  | 11.0 | -2914.35291412 | -2914.35291412 | 7.0  | 22.3 |
| -2916.08703769 | -2916.08703769 | -16.0 | -1.1 | -2914.37310824 | -2914.37310824 | -5.7 | 9.2  |
| -2916.08677205 | -2916.08677205 | -15.9 | -0.8 | -2914.37272743 | -2914.37272743 | -5.5 | 9.6  |
| -2916.08687663 | -2916.08687663 | -15.9 | 0.1  | -2914.37313173 | -2914.37313173 | -5.7 | 10.3 |
| -2916.08687665 | -2916.08687665 | -15.9 | 0.1  | -2914.37313171 | -2914.37313171 | -5.7 | 10.3 |
| -2916.08653577 | -2916.08653577 | -15.7 | 0.9  | -2914.37241847 | -2914.37241847 | -5.3 | 11.3 |
| -2916.08653583 | -2916.08653583 | -15.7 | 0.9  | -2914.37241842 | -2914.37241842 | -5.3 | 11.3 |



|                |                |       |      |                |                |      |      |
|----------------|----------------|-------|------|----------------|----------------|------|------|
| -2916.08243503 | -2916.08243503 | -13.2 | -2.3 | -2914.36549210 | -2914.36549210 | -0.9 | 9.9  |
| -2916.08255224 | -2916.08255224 | -13.2 | -0.6 | -2914.36546478 | -2914.36546478 | -0.9 | 11.7 |
| -2916.08172513 | -2916.08172513 | -12.7 | -0.9 | -2914.36451660 | -2914.36451660 | -0.3 | 11.5 |
| -2916.08227242 | -2916.08227242 | -13.1 | 0.3  | -2914.36452214 | -2914.36452214 | -0.3 | 13.0 |
| -2916.08074477 | -2916.08074477 | -12.1 | 1.1  | -2914.36378329 | -2914.36378329 | 0.1  | 13.4 |
| -2916.08078650 | -2916.08078650 | -12.1 | 1.3  | -2914.36299532 | -2914.36299532 | 0.6  | 14.1 |
| -2141.98112815 | -2981.75207812 | 0.0   | 0.0  | -2141.08592854 | -2980.12303784 | 0.0  | 0.0  |
| -2141.97388588 | -2981.74483585 | 4.5   | 5.6  | -2141.07906502 | -2980.11617432 | 4.3  | 5.3  |
| -2141.96709559 | -2981.73804556 | 8.8   | 10.4 | -2141.07272240 | -2980.10983170 | 8.3  | 9.9  |
| -2141.95903906 | -2981.72998903 | 13.9  | 14.9 | -2141.06541525 | -2980.10252455 | 12.9 | 13.9 |
| -2981.76497869 | -2981.76497869 | -8.1  | 7.1  | -2980.11684251 | -2980.11684251 | 3.9  | 19.0 |
| -2981.76399367 | -2981.76399367 | -7.5  | 7.7  | -2980.11562670 | -2980.11562670 | 4.7  | 19.9 |
| -2981.76389605 | -2981.76389605 | -7.4  | 9.2  | -2980.11591310 | -2980.11591310 | 4.5  | 21.1 |
| -2981.76389605 | -2981.76389605 | -7.4  | 9.2  | -2980.11591304 | -2980.11591304 | 4.5  | 21.1 |
| -2981.76205927 | -2981.76205927 | -6.3  | 9.0  | -2980.11443974 | -2980.11443974 | 5.4  | 20.7 |
| -2981.76254123 | -2981.76254123 | -6.6  | 9.3  | -2980.11527428 | -2980.11527428 | 4.9  | 20.7 |
| -2981.76254126 | -2981.76254126 | -6.6  | 9.3  | -2980.11527430 | -2980.11527430 | 4.9  | 20.7 |
| -2981.75989836 | -2981.75989836 | -4.9  | 10.3 | -2980.11241687 | -2980.11241687 | 6.7  | 21.8 |
| -1986.93873275 | -2826.70968272 | 0.0   | 0.0  | -1985.99257465 | -2825.02968395 | 0.0  | 0.0  |
| -1986.92991494 | -2826.70086491 | 5.5   | 6.9  | -1985.98386763 | -2825.02097693 | 5.5  | 6.8  |
| -1986.92140791 | -2826.69235788 | 10.9  | 11.4 | -1985.97570303 | -2825.01281233 | 10.6 | 11.1 |
| -1986.91153355 | -2826.68248352 | 17.1  | 17.0 | -1985.96623953 | -2825.00334883 | 16.5 | 16.4 |
| -2826.72076203 | -2826.72076203 | -7.0  | 7.1  | -2825.02260559 | -2825.02260559 | 4.4  | 18.5 |
| -2826.71991922 | -2826.71991922 | -6.4  | 7.8  | -2825.02178040 | -2825.02178040 | 5.0  | 19.2 |
| -2826.72097467 | -2826.72097467 | -7.1  | 8.2  | -2825.02275142 | -2825.02275142 | 4.4  | 19.6 |
| -2826.72047286 | -2826.72047286 | -6.8  | 8.5  | -2825.02189370 | -2825.02189370 | 4.9  | 20.2 |
| -2826.71795387 | -2826.71795387 | -5.2  | 10.2 | -2825.02010098 | -2825.02010098 | 6.0  | 21.4 |
| -2826.71795411 | -2826.71795411 | -5.2  | 10.2 | -2825.02010115 | -2825.02010115 | 6.0  | 21.4 |
| -2826.71643793 | -2826.71643793 | -4.2  | 10.6 | -2825.01834091 | -2825.01834091 | 7.1  | 22.0 |
| -2826.71480928 | -2826.71480928 | -3.2  | 12.1 | -2825.01666444 | -2825.01666444 | 8.2  | 23.5 |

$E_{sp}$  ..... single point electronic energy in thf (SMD) in hartree with Def2TZVPP

$E_{sp}$  (sum) single point electronic energy in thf (SMD) in hartree with Def2TZVPP after mass balance

$\Delta E_{sp}$  ... relative single point electronic energy in thf(SMD) in kcal/mol with Def2TZVPP

$\Delta G_{sp}$  ... relative single point free energy in thf(SMD) in kcal/mol ( $\Delta G_{sp} = \Delta E_{sp}/\text{Def2TZVPP} + \Delta G_{\text{con}}[\text{level of optimization}]$ )

## 20. Coordinates after optimization with $\omega$ B97XD/Def2SVP in THF(SMD)

42  
 B2pin2 / electronic energy: -821.730600906 a.u. / lowest freq: 32.24 cm<sup>-1</sup>

|   |           |           |           |
|---|-----------|-----------|-----------|
| H | -3.603963 | 0.156774  | 2.351574  |
| H | -2.641967 | 1.952160  | 1.305027  |
| H | -3.828098 | -1.597532 | 2.177961  |
| C | -3.894435 | -0.635133 | 1.649322  |
| O | -1.618685 | -0.748124 | 0.855381  |
| H | -4.331140 | 1.951526  | 0.725984  |
| C | -3.279144 | 1.909655  | 0.409051  |
| H | -4.943860 | -0.479100 | 1.357330  |
| B | -0.856260 | -0.000012 | -0.000003 |
| H | -3.067634 | 2.802414  | -0.197554 |
| C | -2.993848 | -0.661562 | 0.424433  |
| C | -2.993842 | 0.661563  | -0.424434 |
| O | -1.618679 | 0.748109  | -0.855386 |
| H | -3.067664 | -2.802412 | 0.197554  |
| C | -3.279168 | -1.909651 | -0.409050 |
| H | -4.331167 | -1.951511 | -0.725977 |
| H | -2.641997 | -1.952163 | -1.305030 |
| H | -4.943860 | 0.479131  | -1.357323 |
| C | -3.894433 | 0.635145  | -1.649319 |
| H | -3.828081 | 1.597541  | -2.177962 |
| H | -3.603977 | -0.156769 | -2.351570 |
| H | 3.603967  | -0.156765 | 2.351574  |
| H | 4.331171  | -1.951506 | 0.725981  |
| H | 2.642000  | -1.952165 | 1.305030  |
| C | 3.279173  | -1.909650 | 0.409052  |
| H | 4.943854  | 0.479132  | 1.357331  |
| H | 3.067673  | -2.802411 | -0.197553 |
| C | 3.894426  | 0.635148  | 1.649323  |
| H | 3.828073  | 1.597545  | 2.177963  |
| C | 2.993840  | 0.661564  | 0.424434  |
| C | 2.993851  | -0.661562 | -0.424432 |
| O | 1.618675  | 0.748109  | 0.855382  |
| H | 4.943863  | -0.479097 | -1.357326 |
| B | 0.856259  | -0.000013 | -0.000003 |
| H | 3.828102  | -1.597529 | -2.177960 |
| C | 3.894438  | -0.635131 | -1.649320 |
| O | 1.618688  | -0.748128 | -0.855382 |
| H | 4.331140  | 1.951528  | -0.725981 |
| C | 3.279143  | 1.909656  | -0.409051 |
| H | 3.067630  | 2.802415  | 0.197554  |
| H | 3.603966  | 0.156777  | -2.351571 |
| H | 2.641969  | 1.952159  | -1.305028 |

35  
 tBuO-Bpin / electronic energy: -643.769638430 a.u. / lowest freq: 42.61 cm<sup>-1</sup>

|   |           |           |           |
|---|-----------|-----------|-----------|
| H | 1.950589  | 2.581737  | 1.245788  |
| H | 1.282998  | 2.573049  | -1.114890 |
| C | 2.274938  | 1.530707  | 1.221317  |
| H | 3.366790  | 1.515587  | 1.085137  |
| H | 2.035833  | 1.079159  | 2.192877  |
| H | 2.819476  | 1.743064  | -1.465409 |
| C | 1.758323  | 1.587017  | -1.223856 |
| O | 0.173872  | 0.730324  | 0.345211  |
| C | 1.586120  | 0.805598  | 0.077611  |
| H | 1.279590  | 1.071739  | -2.070267 |
| B | -0.273784 | -0.458619 | -0.181414 |
| C | 1.969903  | -0.713473 | -0.066962 |
| H | 4.016985  | -0.475407 | -0.740030 |
| H | 1.470341  | -1.171356 | 2.009916  |
| H | 3.222625  | -1.039223 | 1.696833  |
| H | 2.836380  | -0.670187 | -2.066266 |
| C | 2.264659  | -1.378292 | 1.276902  |
| C | 3.095618  | -0.991696 | -1.049127 |
| O | 0.750347  | -1.286304 | -0.568902 |
| H | 2.318018  | -2.467244 | 1.132369  |
| H | 3.304871  | -2.071386 | -1.079033 |
| H | -3.900376 | -1.846746 | 0.185679  |
| H | -3.892534 | -1.136209 | -1.449810 |
| O | -1.561156 | -0.836183 | -0.327443 |
| C | -3.912419 | -0.899975 | -0.375151 |
| H | -4.853198 | -0.375327 | -0.151935 |
| C | -2.710277 | -0.040251 | 0.003450  |
| H | -2.679818 | -0.688402 | 2.074890  |
| H | -2.647087 | 1.023616  | -1.890076 |
| C | -2.714720 | 0.252090  | 1.503790  |
| C | -2.700140 | 1.251496  | -0.814221 |
| H | -1.848901 | 0.866578  | 1.788630  |
| H | -3.630700 | 0.791980  | 1.787079  |
| H | -1.839124 | 1.879940  | -0.547103 |
| H | -3.620368 | 1.826118  | -0.630742 |

15  
 NaOtBu / electronic energy: -395.117378571 a.u. / lowest freq: 32.67 cm<sup>-1</sup>

|   |           |           |           |
|---|-----------|-----------|-----------|
| O | -0.737133 | -0.009141 | 0.003654  |
| C | 0.624960  | -0.000675 | -0.000009 |
| C | 1.181519  | -1.414753 | -0.289909 |
| H | 2.284457  | -1.455957 | -0.304558 |
| H | 0.819613  | -2.118024 | 0.477986  |
| H | 0.809650  | -1.764308 | -1.267141 |

|    |           |           |           |
|----|-----------|-----------|-----------|
| C  | 1.175601  | 0.461725  | 1.370139  |
| H  | 2.278378  | 0.484748  | 1.411897  |
| H  | 0.800290  | 1.473434  | 1.596181  |
| H  | 0.814389  | -0.215472 | 2.161532  |
| C  | 1.165629  | 0.961801  | -1.084173 |
| H  | 0.789122  | 1.980374  | -0.894033 |
| H  | 2.268079  | 1.001909  | -1.121930 |
| H  | 0.797342  | 0.647083  | -2.074606 |
| Na | -2.786410 | -0.000841 | 0.000833  |

83

ligand L3a / electronic energy: -2627.35914104 a.u. / lowest freq: 15.38 cm<sup>-1</sup>

|   |           |           |           |
|---|-----------|-----------|-----------|
| H | 7.765869  | -1.234940 | -0.969707 |
| H | 2.614901  | 5.052847  | -0.752008 |
| H | 7.149337  | 1.088242  | -0.310777 |
| C | 6.715261  | -0.952941 | -0.867998 |
| H | -7.112877 | -0.977234 | 1.654310  |
| C | 6.369636  | 0.346740  | -0.501643 |
| H | 5.966870  | -2.912428 | -1.395917 |
| H | -5.265454 | -1.558219 | 3.222556  |
| H | 2.903279  | 2.737044  | -1.564531 |
| C | 2.313544  | 4.216012  | -0.117375 |
| C | 5.708762  | -1.890557 | -1.107339 |
| C | -6.100531 | -0.609625 | 1.470189  |
| H | 1.574160  | 5.478806  | 1.474358  |
| C | -5.066468 | -0.936710 | 2.346161  |
| C | 2.484058  | 2.909962  | -0.568535 |
| C | 5.028276  | 0.708669  | -0.365094 |
| C | 1.731304  | 4.454358  | 1.128972  |
| H | 4.780774  | 1.726385  | -0.055503 |
| H | -6.646255 | 0.458071  | -0.328731 |
| C | 4.369947  | -1.525297 | -0.985196 |
| C | -5.839064 | 0.194532  | 0.359032  |
| C | 4.012603  | -0.224278 | -0.598619 |
| C | -3.775072 | -0.464140 | 2.107881  |
| H | 3.591132  | -2.269585 | -1.178917 |
| H | -2.966581 | -0.725490 | 2.796941  |
| H | 4.493607  | -1.293955 | 1.992683  |
| C | 2.106968  | 1.818303  | 0.231087  |
| C | 1.342001  | 3.378811  | 1.924388  |
| C | -4.547579 | 0.660227  | 0.119160  |
| C | -3.497637 | 0.330529  | 0.987952  |
| C | 1.536697  | 2.068510  | 1.483788  |
| P | 2.205901  | 0.144713  | -0.519241 |
| H | 0.876704  | 3.555529  | 2.896967  |
| C | 3.643788  | -0.774224 | 2.463501  |
| H | -4.356151 | 1.286646  | -0.755499 |
| H | 3.747533  | 0.296941  | 2.243292  |
| H | 3.729671  | -0.908098 | 3.551347  |
| H | -3.106470 | -2.263388 | 0.096077  |
| P | -1.724032 | 0.756409  | 0.694172  |
| C | 2.335583  | -1.296228 | 1.956163  |
| H | 1.217366  | 1.235945  | 2.113681  |
| C | 1.644426  | -0.992924 | 0.803661  |
| H | -4.288965 | -2.482736 | -1.198271 |
| C | -3.259621 | -2.722053 | -0.887608 |
| H | -3.200867 | -3.816360 | -0.771742 |
| H | -0.237492 | 1.941190  | -1.568903 |
| C | -1.391341 | -0.472707 | -0.612127 |
| C | 0.387984  | -1.714027 | 0.697358  |
| C | -1.824954 | 2.375496  | -0.167672 |
| S | 1.475768  | -2.469623 | 2.888151  |
| C | -0.575611 | -1.529308 | -0.413828 |
| C | -0.937790 | 2.694486  | -1.202922 |
| H | -2.978476 | -0.093072 | -2.133891 |
| H | -3.366893 | 3.167242  | 1.136121  |
| H | -0.809102 | -4.410811 | -0.587033 |
| C | -2.676353 | 3.381544  | 0.315826  |
| C | 0.168424  | -2.559490 | 1.757471  |
| C | -2.073708 | -0.689594 | -1.955375 |
| C | -2.266585 | -2.234677 | -1.944777 |
| C | -0.919128 | 3.972639  | -1.760844 |
| C | -0.750858 | -2.481328 | -1.605066 |
| H | -3.704457 | -2.408394 | -3.559139 |
| H | -0.218039 | 4.198036  | -2.568064 |
| C | -0.285227 | -3.909926 | -1.414462 |
| C | -2.659143 | 4.658404  | -0.242172 |
| H | -0.731090 | -4.506375 | 2.032673  |
| C | -1.006737 | -3.439775 | 2.043646  |
| C | -2.723700 | -2.827449 | -3.282374 |
| H | -1.788506 | -3.283962 | 1.291361  |
| C | -1.782034 | 4.958641  | -1.285462 |
| H | -2.850525 | -3.917967 | -3.192168 |
| H | 0.794314  | -3.948240 | -1.198215 |
| H | -3.336218 | 5.424982  | 0.142828  |
| C | -0.967616 | -0.519296 | -3.035660 |
| H | -0.460407 | -4.496213 | -2.330185 |
| H | -0.433387 | 0.432286  | -2.925281 |
| H | -1.769014 | 5.959433  | -1.723508 |
| C | -0.056422 | -1.740966 | -2.788767 |
| H | -1.443886 | -3.223325 | 3.030813  |
| H | -2.039072 | -2.646314 | -4.120245 |
| H | -1.406798 | -0.529800 | -4.043747 |
| H | 0.970876  | -1.456349 | -2.523324 |
| H | 0.003775  | -2.401285 | -3.667013 |

17

NHMe2 / electronic energy: -305.693539420 a.u. / lowest freq: 35.85 cm<sup>-1</sup>

|   |           |          |           |
|---|-----------|----------|-----------|
| C | -0.766605 | 1.222492 | -0.000015 |
|---|-----------|----------|-----------|

|   |           |           |           |
|---|-----------|-----------|-----------|
| H | -1.194780 | 1.714234  | 0.889170  |
| C | 0.766606  | 1.222492  | 0.000015  |
| H | 1.194780  | 1.714234  | -0.889170 |
| C | 0.000000  | -1.018377 | 0.000000  |
| N | -1.072810 | -0.209587 | 0.000011  |
| N | 1.072810  | -0.209588 | -0.000011 |
| H | 1.194744  | 1.714191  | 0.889241  |
| H | -1.194744 | 1.714191  | -0.889241 |
| C | -2.440866 | -0.652458 | 0.000002  |
| H | -2.457478 | -1.749081 | 0.000023  |
| H | -2.979571 | -0.288634 | 0.892010  |
| H | -2.979552 | -0.288668 | -0.892032 |
| C | 2.440866  | -0.652458 | -0.000002 |
| H | 2.979551  | -0.288668 | 0.892032  |
| H | 2.457478  | -1.749081 | -0.000023 |
| H | 2.979572  | -0.288634 | -0.892010 |

13

PMe3 / electronic energy: -460.868416109 a.u. / lowest freq: 167.39 cm-1

|   |           |           |           |
|---|-----------|-----------|-----------|
| P | -0.000338 | 0.000102  | -0.594729 |
| C | 0.584291  | -1.525343 | 0.274538  |
| H | 1.620053  | -1.746096 | -0.024732 |
| H | 0.546134  | -1.418301 | 1.370846  |
| H | -0.041774 | -2.380912 | -0.020763 |
| C | 1.029583  | 1.268275  | 0.274512  |
| H | 2.082777  | 1.155899  | -0.024160 |
| H | 0.701219  | 2.276321  | -0.020713 |
| H | 0.959458  | 1.178298  | 1.370763  |
| C | -1.613350 | 0.256983  | 0.274797  |
| H | -2.321224 | -0.532226 | -0.020573 |
| H | -1.500738 | 0.241234  | 1.371091  |
| H | -2.043983 | 1.224754  | -0.023911 |

13

thf / electronic energy: -232.213178364 a.u. / lowest freq: 60.28 cm-1

|   |           |           |           |
|---|-----------|-----------|-----------|
| C | -0.729532 | 0.989834  | -0.227142 |
| C | 0.729533  | 0.989833  | 0.227142  |
| C | -1.158358 | -0.431440 | 0.131766  |
| H | -0.791959 | 1.147286  | -1.315596 |
| H | -1.344762 | 1.756834  | 0.263102  |
| C | 1.158358  | -0.431441 | -0.131767 |
| H | 0.791960  | 1.147284  | 1.315597  |
| H | 1.344764  | 1.756833  | -0.263101 |
| O | 0.000000  | -1.238426 | 0.000001  |
| H | -1.950010 | -0.820430 | -0.528067 |
| H | -1.532900 | -0.480344 | 1.171812  |
| H | 1.950011  | -0.820432 | 0.528064  |
| H | 1.532897  | -0.480344 | -1.171814 |

24

para-NMe2-styrene / electronic energy: -443.166962707 a.u. / lowest freq: 46.13 cm-1

|   |           |           |           |
|---|-----------|-----------|-----------|
| C | -1.001621 | 1.367094  | 0.000000  |
| C | 0.384629  | 1.273883  | -0.000002 |
| C | -1.829461 | 0.234869  | 0.000002  |
| C | 1.028265  | 0.013666  | -0.000005 |
| C | -1.188277 | -1.015137 | 0.000005  |
| C | 0.193460  | -1.133042 | 0.000002  |
| C | -3.292425 | 0.400175  | 0.000003  |
| C | -4.224681 | -0.561132 | -0.000005 |
| H | 0.630545  | -2.131314 | 0.000007  |
| H | -1.783119 | -1.932381 | 0.000013  |
| H | 0.968381  | 2.194269  | -0.000004 |
| H | -1.459369 | 2.360836  | -0.000001 |
| H | -5.287906 | -0.306563 | -0.000004 |
| H | -3.975223 | -1.626890 | -0.000013 |
| H | -3.630810 | 1.443590  | 0.000010  |
| H | 2.750606  | -1.990268 | -0.892343 |
| H | 4.110298  | -1.276169 | 0.000013  |
| C | 3.020741  | -1.397949 | 0.000000  |
| H | 2.750584  | -1.990260 | 0.892344  |
| N | 2.395339  | -0.095548 | -0.000012 |
| H | 3.033100  | 1.721348  | -0.892262 |
| H | 4.271950  | 0.812102  | -0.000021 |
| C | 3.212780  | 1.095778  | 0.000005  |
| H | 3.033130  | 1.721307  | 0.892307  |

16

para-H-styrene / electronic energy: -309.327235333 a.u. / lowest freq: 23.45 cm-1

|   |           |           |           |
|---|-----------|-----------|-----------|
| C | 0.512682  | -0.226965 | -0.000001 |
| C | -0.409996 | -1.284277 | -0.000001 |
| C | 0.015494  | 1.087347  | 0.000000  |
| C | -1.354543 | 1.331056  | 0.000001  |
| C | -2.260833 | 0.267881  | 0.000000  |
| C | -1.783088 | -1.041654 | -0.000001 |
| H | 0.707601  | 1.932393  | 0.000000  |
| H | -1.720740 | 2.360625  | 0.000002  |
| H | -3.335980 | 0.462131  | 0.000001  |
| H | -2.483584 | -1.880208 | -0.000001 |
| H | -0.041395 | -2.313890 | -0.000002 |
| C | 1.957762  | -0.536594 | -0.000001 |
| C | 2.966585  | 0.340887  | 0.000002  |
| H | 2.197140  | -1.606375 | -0.000004 |
| H | 2.808763  | 1.423612  | 0.000005  |
| H | 4.003818  | -0.004370 | 0.000001  |

22

para-CO2Me-styrene / electronic energy: -536.972466017 a.u. / lowest freq: 36.27 cm-1

|   |           |           |           |
|---|-----------|-----------|-----------|
| C | -2.177029 | -0.273944 | -0.000002 |
| C | -1.288457 | -1.360405 | -0.000006 |
| C | -1.638856 | 1.024705  | 0.000001  |
| C | -0.265795 | 1.223967  | 0.000001  |
| C | 0.611262  | 0.131581  | -0.000002 |

|   |           |           |           |
|---|-----------|-----------|-----------|
| C | 0.088912  | -1.165460 | -0.000005 |
| H | -2.301589 | 1.892476  | 0.000003  |
| H | 0.147069  | 2.234463  | 0.000003  |
| C | 2.078496  | 0.403327  | -0.000003 |
| H | 0.763300  | -2.022664 | -0.000007 |
| H | -1.688181 | -2.377645 | -0.000009 |
| C | -3.629628 | -0.539756 | -0.000003 |
| C | -4.608155 | 0.371151  | 0.000010  |
| H | -3.902499 | -1.601050 | -0.000014 |
| H | -4.416278 | 1.448163  | 0.000022  |
| H | -5.656147 | 0.060285  | 0.000008  |
| O | 2.563111  | 1.509790  | -0.000011 |
| O | 2.807344  | -0.712177 | 0.000008  |
| C | 4.219407  | -0.553732 | 0.000008  |
| H | 4.642711  | -1.564424 | 0.000021  |
| H | 4.553514  | -0.009542 | 0.895244  |
| H | 4.553517  | -0.009561 | -0.895238 |

21

allylphosphate / electronic energy: -838.811918777 a.u. / lowest freq: 44.19 cm-1

|   |           |           |           |
|---|-----------|-----------|-----------|
| C | -4.228065 | -0.213625 | -0.450712 |
| C | -3.126548 | -0.470342 | 0.252592  |
| C | -1.864256 | 0.322400  | 0.141664  |
| O | -0.783039 | -0.563443 | -0.176535 |
| P | 0.707286  | -0.141276 | 0.217233  |
| O | 0.970662  | 0.121311  | 1.650298  |
| O | 1.460311  | -1.365735 | -0.468955 |
| O | 1.061740  | 1.104182  | -0.737886 |
| C | 2.879635  | -1.448876 | -0.389717 |
| C | 1.322758  | 2.400172  | -0.210050 |
| H | -5.142764 | -0.796179 | -0.309890 |
| H | -4.259343 | 0.593594  | -1.190453 |
| H | -3.110287 | -1.285179 | 0.985530  |
| H | -1.947579 | 1.092560  | -0.642170 |
| H | -1.655843 | 0.823591  | 1.102977  |
| H | 1.710475  | 3.008958  | -1.036651 |
| H | 2.070246  | 2.360904  | 0.595111  |
| H | 0.403000  | 2.866284  | 0.175408  |
| H | 3.173659  | -2.389342 | -0.871246 |
| H | 3.217914  | -1.455776 | 0.657446  |
| H | 3.352692  | -0.609183 | -0.922604 |

15

PMe3-Cu-H / electronic energy: -2101.82973385 a.u. / lowest freq: 97.88 cm-1

|    |           |           |           |
|----|-----------|-----------|-----------|
| H  | -1.104721 | 2.225261  | -0.852565 |
| H  | -1.093050 | 1.368789  | 1.951436  |
| C  | -1.425922 | 1.209357  | -1.126228 |
| C  | -1.415982 | 0.373096  | 1.612246  |
| H  | -2.524071 | 1.151181  | -1.073457 |
| H  | -1.103202 | 1.014093  | -2.159812 |
| H  | -2.514845 | 0.353775  | 1.545124  |
| H  | -1.085574 | -0.366086 | 2.356940  |
| P  | -0.639847 | -0.000027 | -0.001647 |
| C  | -1.420666 | -1.584277 | -0.479814 |
| H  | -2.519328 | -1.515999 | -0.452390 |
| H  | -1.101926 | -1.859866 | -1.496268 |
| H  | -1.090664 | -2.375237 | 0.209827  |
| Cu | 1.591472  | 0.000552  | -0.001554 |
| H  | 3.157819  | -0.000576 | 0.003704  |

19

NHMe2-Cu-H / electronic energy: -1946.68467112 a.u. / lowest freq: 61.43 cm-1

|    |           |           |           |
|----|-----------|-----------|-----------|
| Cu | -1.869884 | -0.000005 | 0.000000  |
| H  | -3.434689 | 0.000004  | 0.000023  |
| H  | 0.766219  | -2.982321 | 0.893811  |
| H  | 2.777359  | -1.194948 | 0.890330  |
| C  | 0.405973  | -2.446840 | -0.000004 |
| H  | -0.692131 | -2.453571 | -0.000001 |
| H  | 2.777351  | 1.194965  | 0.890332  |
| N  | 0.862080  | -1.081548 | -0.000001 |
| C  | 2.289525  | -0.767453 | 0.000002  |
| H  | 0.766213  | -2.982315 | -0.893826 |
| C  | 0.076079  | -0.000001 | -0.000001 |
| C  | 2.289519  | 0.767469  | 0.000004  |
| H  | 0.766207  | 2.982332  | 0.893799  |
| H  | 2.777362  | -1.194946 | -0.890324 |
| N  | 0.862071  | 1.081552  | 0.000004  |
| C  | 0.405953  | 2.446841  | -0.000006 |
| H  | 2.777352  | 1.194968  | -0.890323 |
| H  | -0.692152 | 2.453561  | 0.000013  |
| H  | 0.766175  | 2.982311  | -0.893837 |

26

para-NMe2-styrene-Cu-H / electronic energy: -2084.11501069 a.u. / lowest freq: 54.80 cm-1

|    |           |           |           |
|----|-----------|-----------|-----------|
| Cu | 2.999355  | -0.200226 | -0.784375 |
| H  | 3.390503  | -0.553581 | -2.255182 |
| H  | -1.680785 | -2.065887 | 0.489478  |
| C  | -1.285578 | -1.051929 | 0.438423  |
| H  | 0.669238  | -1.726373 | 0.949773  |
| C  | 0.058923  | -0.853889 | 0.703441  |
| C  | -2.135974 | 0.033861  | 0.101829  |
| H  | 2.767965  | -1.270333 | 1.561962  |
| C  | -1.544589 | 1.320062  | 0.048408  |
| C  | 0.644926  | 0.422769  | 0.652207  |
| C  | 3.016212  | -0.233340 | 1.313107  |
| H  | -2.142215 | 2.194676  | -0.206600 |
| C  | -0.194256 | 1.495109  | 0.314010  |
| C  | 2.073169  | 0.671820  | 0.904129  |
| H  | 0.226432  | 2.503063  | 0.256107  |
| H  | 2.372759  | 1.725344  | 0.838707  |
| H  | 4.015062  | 0.111062  | 1.595736  |

|   |           |           |           |
|---|-----------|-----------|-----------|
| H | -3.945377 | 1.450017  | -1.465372 |
| H | -5.321099 | 0.620744  | -0.704579 |
| C | -4.295008 | 0.967264  | -0.535689 |
| H | -4.326805 | 1.737147  | 0.254466  |
| H | -3.576612 | -2.154572 | -0.875995 |
| N | -3.465134 | -0.155951 | -0.160897 |
| H | -5.105988 | -1.429174 | -0.331347 |
| C | -4.031155 | -1.486017 | -0.123291 |
| H | -3.908464 | -1.958205 | 0.866568  |

18

para-H-styrene-Cu-H / electronic energy: -1950.27347322 a.u. / lowest freq: 32.14 cm-1

|    |           |           |           |
|----|-----------|-----------|-----------|
| Cu | 2.028179  | -0.305190 | -0.495135 |
| H  | 2.754416  | -1.205888 | -1.547483 |
| H  | -2.465572 | -2.384578 | 0.628580  |
| C  | -2.229727 | -1.348873 | 0.373629  |
| H  | -0.187384 | -1.522477 | 1.021800  |
| H  | -4.213626 | -0.913226 | -0.365976 |
| C  | -0.946915 | -0.859504 | 0.599853  |
| C  | -3.207963 | -0.525491 | -0.187817 |
| H  | 1.458986  | -0.291086 | 2.040851  |
| C  | -2.892328 | 0.789499  | -0.527405 |
| C  | -0.619222 | 0.465804  | 0.269134  |
| C  | 1.663136  | 0.554436  | 1.375717  |
| H  | -3.650810 | 1.439378  | -0.969886 |
| C  | -1.605787 | 1.278422  | -0.307310 |
| C  | 0.730962  | 1.029030  | 0.495676  |
| H  | -1.361356 | 2.309237  | -0.576875 |
| H  | 0.923428  | 1.989718  | 0.002777  |
| H  | 2.571781  | 1.129505  | 1.576274  |

24

para-CO2Me-styrene-Cu-H / electronic energy: -2177.91838845 a.u. / lowest freq: 43.01 cm-1

|    |           |           |           |
|----|-----------|-----------|-----------|
| Cu | 3.335163  | -0.143092 | -0.820022 |
| H  | 3.787606  | -0.552242 | -2.258376 |
| H  | -1.275705 | -2.172070 | 0.499056  |
| C  | -0.885854 | -1.153198 | 0.465705  |
| H  | 1.129434  | -1.749438 | 0.880268  |
| C  | 0.461958  | -0.908180 | 0.683380  |
| C  | -1.765161 | -0.097257 | 0.196181  |
| H  | 3.142717  | -1.191536 | 1.549225  |
| C  | -1.273412 | 1.210560  | 0.146107  |
| C  | 0.965853  | 0.403176  | 0.640182  |
| C  | 3.361484  | -0.153917 | 1.278133  |
| H  | -1.950576 | 2.038580  | -0.066274 |
| C  | 0.078691  | 1.453563  | 0.364021  |
| C  | 2.395498  | 0.716998  | 0.856725  |
| H  | 0.457183  | 2.477650  | 0.319929  |
| H  | 2.654601  | 1.778940  | 0.771682  |
| H  | 4.355868  | 0.220045  | 1.537928  |
| H  | -5.760531 | 1.446488  | -0.690765 |
| C  | -5.326819 | 0.455543  | -0.514822 |
| H  | -5.800336 | -0.007852 | 0.362848  |
| H  | -5.492971 | -0.186544 | -1.391846 |
| O  | -3.938039 | 0.661363  | -0.292397 |
| C  | -3.205491 | -0.419598 | -0.032247 |
| O  | -3.662896 | -1.536174 | 0.013244  |

98

Figure 1\_L-Cu-OtBu / electronic energy: -4500.61984018 a.u. / lowest freq: -20.29 cm-1

|   |           |           |           |
|---|-----------|-----------|-----------|
| P | -1.580542 | 0.896725  | 0.507317  |
| C | -2.908207 | 3.157185  | -0.383641 |
| C | -4.006725 | 3.985801  | -0.616704 |
| C | -3.065934 | 1.952882  | 0.310453  |
| C | -5.267815 | 3.615698  | -0.152099 |
| C | -4.334988 | 1.587341  | 0.777167  |
| C | -5.430677 | 2.415956  | 0.544998  |
| C | -2.523549 | -1.468960 | 3.766793  |
| C | -2.433956 | -0.995007 | 2.458931  |
| C | -1.750721 | 0.195213  | 2.185586  |
| C | -1.940215 | -0.754291 | 4.813269  |
| C | -1.270557 | 0.441252  | 4.550950  |
| C | -1.173132 | 0.911691  | 3.242472  |
| C | -2.488216 | -0.166613 | -2.032914 |
| C | -1.872393 | -0.448550 | -0.671022 |
| C | -1.299140 | -1.669779 | -0.734533 |
| C | -1.272709 | 0.069693  | -2.972172 |
| C | -0.635837 | -1.334154 | -3.044849 |
| C | -1.568682 | -2.215154 | -2.148736 |
| C | -1.395589 | -3.700880 | -2.383493 |
| C | -2.968758 | -1.580997 | -2.446504 |
| C | -3.416732 | -1.695439 | -3.906676 |
| C | -4.117793 | -2.103832 | -1.580032 |
| C | -0.402948 | -2.359373 | 0.224528  |
| C | -0.776860 | -3.505808 | 0.883773  |
| C | 0.975407  | -1.984659 | 0.502411  |
| S | 0.536953  | -4.140203 | 1.811096  |
| C | 1.617684  | -2.882805 | 1.327412  |
| C | -2.109087 | -4.184545 | 0.927504  |
| C | 3.027464  | -2.915300 | 1.833201  |
| P | 1.678909  | -0.407382 | -0.087965 |
| C | 3.102106  | 0.859929  | 3.522479  |
| C | 2.302495  | 0.358977  | 2.498979  |
| C | 4.452175  | 1.127830  | 3.286856  |
| C | 2.843742  | 0.105397  | 1.231146  |
| C | 4.993844  | 0.884481  | 2.025620  |
| C | 4.195075  | 0.374971  | 1.000685  |
| C | 3.810868  | 0.068843  | -3.514968 |
| C | 3.023741  | 0.281283  | -2.383591 |
| C | 4.288299  | -1.209367 | -3.809490 |

|    |           |           |           |
|----|-----------|-----------|-----------|
| C  | 2.730665  | -0.792862 | -1.528752 |
| C  | 3.979451  | -2.281011 | -2.970507 |
| C  | 3.204103  | -2.074442 | -1.829949 |
| H  | -1.915778 | 3.440512  | -0.746059 |
| H  | -3.873260 | 4.924573  | -1.159108 |
| H  | -6.129053 | 4.263617  | -0.331942 |
| H  | -4.472168 | 0.649243  | 1.321329  |
| H  | -6.418530 | 2.124936  | 0.910059  |
| H  | -3.052633 | -2.403325 | 3.968939  |
| H  | -2.893523 | -1.557737 | 1.644298  |
| H  | -2.009117 | -1.130195 | 5.836777  |
| H  | -0.813928 | 1.005846  | 5.367081  |
| H  | -0.634680 | 1.841763  | 3.037295  |
| H  | -3.246522 | 0.627518  | -2.056758 |
| H  | -0.589719 | 0.827995  | -2.558260 |
| H  | -1.599587 | 0.429651  | -3.958197 |
| H  | 0.397965  | -1.358219 | -2.675070 |
| H  | -0.612264 | -1.725800 | -4.072823 |
| H  | -1.570304 | -3.939191 | -3.444195 |
| H  | -2.092416 | -4.304994 | -1.785566 |
| H  | -0.372211 | -4.024525 | -2.136174 |
| H  | -4.283813 | -1.039932 | -4.086553 |
| H  | -3.735264 | -2.726536 | -4.127997 |
| H  | -2.643849 | -1.427048 | -4.637860 |
| H  | -5.049987 | -1.574746 | -1.833824 |
| H  | -3.945257 | -1.962235 | -0.505502 |
| H  | -4.291685 | -3.176350 | -1.763069 |
| H  | -2.830286 | -3.652783 | 0.295310  |
| H  | -2.511139 | -4.201379 | 1.953149  |
| H  | -2.051970 | -5.227314 | 0.578596  |
| H  | 3.133815  | -2.345375 | 2.769850  |
| H  | 3.720647  | -2.481976 | 1.101170  |
| H  | 3.345945  | -3.948938 | 2.031729  |
| H  | 2.665823  | 1.045999  | 4.506885  |
| H  | 1.245355  | 0.156678  | 2.688849  |
| H  | 5.080940  | 1.527152  | 4.086046  |
| H  | 6.049214  | 1.091790  | 1.833772  |
| H  | 4.633959  | 0.190791  | 0.017398  |
| H  | 4.040865  | 0.905396  | -4.179302 |
| H  | 2.611508  | 1.276687  | -2.160485 |
| H  | 4.894279  | -1.374226 | -4.703735 |
| H  | 4.343260  | -3.284201 | -3.205138 |
| H  | 2.955927  | -2.917868 | -1.180520 |
| Cu | 0.417430  | 1.531952  | -0.315265 |
| H  | 1.533422  | 5.234717  | -2.570756 |
| H  | 2.752520  | 5.897866  | -1.444814 |
| H  | 3.117535  | 4.440494  | -2.410028 |
| C  | 2.325100  | 4.966405  | -1.852792 |
| H  | -0.149226 | 5.110504  | -0.667688 |
| C  | 1.752337  | 4.045194  | -0.761300 |
| H  | 1.046191  | 5.717534  | 0.511698  |
| O  | 1.233972  | 2.914790  | -1.363084 |
| C  | 0.662151  | 4.810177  | 0.015323  |
| H  | 3.662168  | 3.098170  | -0.312532 |
| H  | 3.360480  | 4.550221  | 0.683303  |
| C  | 2.883951  | 3.670816  | 0.217078  |
| H  | 0.224040  | 4.154997  | 0.787863  |
| H  | 2.491679  | 3.029307  | 1.024769  |

140

Figure 1\_ed / electronic energy: -5322.37772681 a.u. / lowest freq: 19.05 cm-1

|   |           |           |           |
|---|-----------|-----------|-----------|
| P | -1.547195 | 1.304450  | 1.048267  |
| C | -0.430925 | 3.863086  | 1.043101  |
| C | -0.447728 | 5.254931  | 1.170371  |
| C | -1.605414 | 3.127758  | 1.213465  |
| C | -1.638136 | 5.915613  | 1.458426  |
| C | -2.803828 | 3.800895  | 1.499630  |
| C | -2.820605 | 5.186125  | 1.619324  |
| C | -3.327289 | -1.020465 | 3.954702  |
| C | -2.866831 | -0.544656 | 2.728353  |
| C | -2.331137 | 0.744996  | 2.616052  |
| C | -3.248114 | -0.220419 | 5.094159  |
| C | -2.704538 | 1.059339  | 4.995362  |
| C | -2.246958 | 1.538789  | 3.768678  |
| C | -2.930174 | 2.064722  | -1.375651 |
| C | -2.704765 | 0.986821  | -0.321920 |
| C | -3.153769 | -0.174768 | -0.845093 |
| C | -1.872684 | 1.752088  | -2.460597 |
| C | -2.391709 | 0.428171  | -3.057153 |
| C | -3.704160 | 0.152177  | -2.250564 |
| C | -4.620533 | -0.847906 | -2.924612 |
| C | -4.248285 | 1.600403  | -2.033048 |
| C | -4.601040 | 2.340702  | -3.326353 |
| C | -5.454326 | 1.719931  | -1.098426 |
| C | -3.065595 | -1.592398 | -0.417185 |
| C | -4.206747 | -2.292385 | -0.098851 |
| C | -1.886669 | -2.445210 | -0.475491 |
| S | -3.876353 | -3.978551 | 0.046720  |
| C | -2.198597 | -3.780239 | -0.303250 |
| C | -5.581148 | -1.779939 | 0.189394  |
| C | -1.354435 | -5.015900 | -0.388730 |
| P | -0.156384 | -1.818798 | -0.539295 |
| C | 0.786081  | -3.997748 | 2.788146  |
| C | 0.224185  | -3.100075 | 1.885184  |
| C | 1.843183  | -4.818463 | 2.391163  |
| C | 0.692114  | -3.022515 | 0.568671  |
| C | 2.329895  | -4.727784 | 1.088545  |
| C | 1.761725  | -3.831389 | 0.182943  |

|    |           |           |           |
|----|-----------|-----------|-----------|
| C  | 2.251664  | -2.253905 | -3.818461 |
| C  | 1.764904  | -1.947318 | -2.548781 |
| C  | 1.412257  | -2.814807 | -4.782712 |
| C  | 0.432547  | -2.241159 | -2.221731 |
| C  | 0.081201  | -3.085013 | -4.468056 |
| C  | -0.404769 | -2.807779 | -3.189824 |
| H  | 0.505688  | 3.354401  | 0.801614  |
| H  | 0.478902  | 5.818745  | 1.041500  |
| H  | -1.650640 | 7.003555  | 1.559186  |
| H  | -3.731113 | 3.235218  | 1.626678  |
| H  | -3.758070 | 5.702154  | 1.839069  |
| H  | -3.744796 | -2.028268 | 4.016609  |
| H  | -2.919218 | -1.196081 | 1.856834  |
| H  | -3.605017 | -0.595048 | 6.056308  |
| H  | -2.629216 | 1.693641  | 5.881653  |
| H  | -1.808824 | 2.537227  | 3.721107  |
| H  | -2.915281 | 3.099843  | -1.016079 |
| H  | -0.872090 | 1.647907  | -2.021689 |
| H  | -1.832472 | 2.556856  | -3.207990 |
| H  | -1.678260 | -0.399080 | -2.942625 |
| H  | -2.609442 | 0.514469  | -4.132078 |
| H  | -4.856840 | -0.508497 | -3.945321 |
| H  | -5.571482 | -0.976151 | -2.388629 |
| H  | -4.144513 | -1.836877 | -3.010063 |
| H  | -4.752597 | 3.412167  | -3.119371 |
| H  | -5.543999 | 1.952685  | -3.743289 |
| H  | -3.839030 | 2.260843  | -4.112041 |
| H  | -5.724791 | 2.780512  | -0.974141 |
| H  | -5.265236 | 1.312766  | -0.096885 |
| H  | -6.333802 | 1.207036  | -1.519651 |
| H  | -5.660840 | -0.719198 | -0.072302 |
| H  | -5.810520 | -1.870380 | 1.263919  |
| H  | -6.356415 | -2.333312 | -0.362050 |
| H  | -0.889560 | -5.263941 | 0.577842  |
| H  | -0.551382 | -4.893664 | -1.126611 |
| H  | -1.966287 | -5.876247 | -0.697484 |
| H  | 0.397982  | -4.054218 | 3.807976  |
| H  | -0.601473 | -2.460661 | 2.208461  |
| H  | 2.285921  | -5.525136 | 3.097118  |
| H  | 3.159189  | -5.363259 | 0.768616  |
| H  | 2.151121  | -3.785790 | -0.835087 |
| H  | 3.296709  | -2.042638 | -4.058898 |
| H  | 2.416565  | -1.480774 | -1.802398 |
| H  | 1.796485  | -3.040175 | -5.780635 |
| H  | -0.584895 | -3.519837 | -5.217116 |
| H  | -1.446131 | -3.034108 | -2.949453 |
| H  | 0.670018  | 2.071794  | 2.804974  |
| H  | 2.426314  | 2.368961  | 2.686458  |
| O  | 1.929360  | -0.152095 | 1.878567  |
| C  | 1.646371  | 1.839205  | 3.251615  |
| H  | 1.642346  | 2.217713  | 4.285739  |
| C  | 1.900954  | 0.329626  | 3.221723  |
| H  | -0.171351 | -0.315763 | 3.355895  |
| H  | 4.035711  | 0.585794  | 3.568264  |
| C  | 0.761772  | -0.407283 | 3.924490  |
| C  | 3.198095  | 0.007016  | 3.969096  |
| H  | 0.999276  | -1.475299 | 4.025996  |
| H  | 0.592182  | 0.006383  | 4.930600  |
| H  | 3.428380  | -1.065543 | 3.882133  |
| H  | 3.080786  | 0.239712  | 5.039683  |
| Cu | 0.396616  | 0.248269  | 0.480918  |
| H  | 4.501374  | 3.509594  | -2.264572 |
| H  | 3.875068  | 2.057661  | -4.250465 |
| H  | 4.247900  | 1.268416  | -2.700795 |
| C  | 3.475891  | 1.397803  | -3.466780 |
| H  | 3.509620  | 4.444103  | -3.416382 |
| H  | 3.279512  | 0.413394  | -3.914115 |
| C  | 3.570788  | 4.079501  | -2.379538 |
| H  | 3.629261  | 4.955346  | -1.715965 |
| C  | 2.344141  | 3.249510  | -2.026478 |
| C  | 2.170370  | 1.943345  | -2.886748 |
| O  | 2.499468  | 2.733692  | -0.694623 |
| H  | 1.558092  | 2.729927  | -4.806307 |
| B  | 2.084067  | 1.415139  | -0.633221 |
| H  | 1.025361  | 1.061262  | -4.484426 |
| C  | 1.171259  | 2.052745  | -4.029472 |
| O  | 1.707269  | 1.000998  | -1.907429 |
| H  | 0.957349  | 4.619401  | -3.015866 |
| C  | 1.106256  | 4.143888  | -2.035167 |
| H  | 1.232112  | 4.939196  | -1.286328 |
| H  | 0.196373  | 2.425560  | -3.708565 |
| H  | 0.198683  | 3.581199  | -1.776755 |
| H  | 5.880284  | -0.149264 | 2.751331  |
| H  | 4.404211  | -1.786359 | 2.188543  |
| H  | 6.407634  | 1.480767  | 2.283518  |
| C  | 6.206763  | 0.466673  | 1.904829  |
| O  | 3.954429  | 1.060867  | 1.290203  |
| H  | 5.986517  | -2.215060 | 1.470182  |
| C  | 4.926592  | -2.013870 | 1.251054  |
| H  | 7.155645  | 0.054007  | 1.526583  |
| B  | 2.806496  | 0.342354  | 0.769922  |
| H  | 4.481637  | -2.932124 | 0.842471  |
| C  | 5.163405  | 0.533333  | 0.788888  |
| C  | 4.744587  | -0.887302 | 0.229029  |
| O  | 3.367225  | -0.737028 | -0.036971 |
| H  | 5.827248  | 2.482376  | 0.163325  |
| C  | 5.690538  | 1.487359  | -0.286037 |



|   |          |           |           |
|---|----------|-----------|-----------|
| H | 6.651682 | 1.162381  | -0.711767 |
| H | 4.960765 | 1.597588  | -1.093068 |
| H | 6.545622 | -1.327315 | -0.927257 |
| C | 5.453794 | -1.280566 | -1.064987 |
| H | 5.113536 | -2.277053 | -1.388253 |
| H | 5.232620 | -0.573918 | -1.875807 |

140

Figure 1\_ts(TB)\_01 / electronic energy: -5322.37787478 a.u. / lowest freq: -98.49 cm<sup>-1</sup>

|   |           |           |           |
|---|-----------|-----------|-----------|
| P | 0.567604  | 1.984871  | 0.215083  |
| C | 0.435192  | 1.076768  | 2.845831  |
| C | 0.533084  | 1.174687  | 4.232885  |
| C | 0.608943  | 2.207356  | 2.040187  |
| C | 0.778821  | 2.410890  | 4.828906  |
| C | 0.855456  | 3.445804  | 2.644560  |
| C | 0.933434  | 3.546988  | 4.032706  |
| C | -1.745129 | 5.281135  | -0.474281 |
| C | -1.251737 | 4.066706  | -0.005659 |
| C | 0.031414  | 3.634756  | -0.373198 |
| C | -0.969942 | 6.072925  | -1.324363 |
| C | 0.300893  | 5.643259  | -1.701722 |
| C | 0.801212  | 4.429185  | -1.226817 |
| C | 3.450211  | 2.721609  | 0.390540  |
| C | 2.329997  | 1.861609  | -0.177371 |
| C | 2.907629  | 0.827083  | -0.822291 |
| C | 4.042097  | 1.885200  | 1.560290  |
| C | 4.711477  | 0.708484  | 0.819769  |
| C | 4.428185  | 1.000925  | -0.689275 |
| C | 5.292578  | 0.198577  | -1.638783 |
| C | 4.546577  | 2.565109  | -0.704750 |
| C | 5.919695  | 3.109422  | -0.295648 |
| C | 4.207040  | 3.210339  | -2.048434 |
| C | 2.234308  | -0.312926 | -1.491920 |
| C | 1.981190  | -0.300871 | -2.843310 |
| C | 1.786218  | -1.533822 | -0.847454 |
| S | 1.178436  | -1.749737 | -3.321705 |
| C | 1.191422  | -2.410382 | -1.731711 |
| C | 2.294367  | 0.760062  | -3.853094 |
| C | 0.598031  | -3.763424 | -1.500443 |
| P | 2.127293  | -1.810926 | 0.928221  |
| C | 0.132824  | -5.079367 | 2.540473  |
| C | 1.138694  | -4.279031 | 1.998561  |
| C | -1.178722 | -4.608725 | 2.615071  |
| C | 0.845798  | -2.996975 | 1.513865  |
| C | -1.477385 | -3.333289 | 2.137595  |
| C | -0.474826 | -2.536043 | 1.591249  |
| C | 5.534292  | -3.744516 | 2.131089  |
| C | 4.351887  | -3.008857 | 2.086933  |
| C | 6.051019  | -4.306626 | 0.962554  |
| C | 3.654401  | -2.842932 | 0.880377  |
| C | 5.375185  | -4.133853 | -0.244544 |
| C | 4.182638  | -3.409320 | -0.285457 |
| H | 0.214525  | 0.112080  | 2.386871  |
| H | 0.404154  | 0.280641  | 4.846841  |
| H | 0.846527  | 2.492240  | 5.916339  |
| H | 0.983203  | 4.341632  | 2.032142  |
| H | 1.118866  | 4.518830  | 4.496035  |
| H | -2.747796 | 5.604444  | -0.184381 |
| H | -1.879573 | 3.433771  | 0.628122  |
| H | -1.361202 | 7.022417  | -1.697535 |
| H | 0.912679  | 6.255269  | -2.368677 |
| H | 1.796117  | 4.102791  | -1.530150 |
| H | 3.171766  | 3.750735  | 0.657928  |
| H | 3.257220  | 1.555157  | 2.253406  |
| H | 4.764464  | 2.476176  | 2.141455  |
| H | 4.304668  | -0.264056 | 1.116814  |
| H | 5.796990  | 0.665245  | 0.992135  |
| H | 6.359281  | 0.400759  | -1.455668 |
| H | 5.079426  | 0.430771  | -2.692740 |
| H | 5.131680  | -0.881072 | -1.493351 |
| H | 5.858584  | 4.200647  | -0.155321 |
| H | 6.656528  | 2.925890  | -1.093477 |
| H | 6.326754  | 2.682758  | 0.629205  |
| H | 4.198755  | 4.307955  | -1.953713 |
| H | 3.236923  | 2.895259  | -2.445299 |
| H | 4.971395  | 2.955684  | -2.799448 |
| H | 3.378130  | 0.933573  | -3.928317 |
| H | 1.820323  | 1.714999  | -3.585294 |
| H | 1.934847  | 0.480317  | -4.853216 |
| H | -0.372824 | -3.657665 | -0.995784 |
| H | 1.252646  | -4.384727 | -0.874041 |
| H | 0.435860  | -4.290738 | -2.451516 |
| H | 0.378935  | -6.079106 | 2.907195  |
| H | 2.157493  | -4.669173 | 1.945566  |
| H | -1.964151 | -5.236188 | 3.043719  |
| H | -2.489373 | -2.927519 | 2.182806  |
| H | -0.754852 | -1.552703 | 1.202174  |
| H | 6.060534  | -3.870045 | 3.080333  |
| H | 3.963277  | -2.554443 | 3.003476  |
| H | 6.984926  | -4.872953 | 0.992903  |
| H | 5.777255  | -4.566314 | -1.163974 |
| H | 3.664160  | -3.278984 | -1.238105 |
| H | -1.294299 | 2.635864  | -4.292559 |
| H | -3.384493 | 1.283643  | -5.014995 |
| H | -0.435815 | 1.071131  | -4.228817 |
| C | -1.043978 | 1.779170  | -3.648949 |
| H | -3.446966 | 2.931406  | -3.000928 |
| H | -2.460236 | -0.232700 | -4.853686 |

|    |           |           |           |
|----|-----------|-----------|-----------|
| C  | -3.084413 | 0.492945  | -4.309961 |
| H  | -0.441116 | 2.146468  | -2.804475 |
| C  | -2.305172 | 1.092625  | -3.139672 |
| H  | -3.987996 | -0.015152 | -3.948497 |
| C  | -3.166580 | 2.082980  | -2.357866 |
| H  | -2.610601 | 2.473482  | -1.495614 |
| H  | -4.077610 | 1.602308  | -1.979864 |
| H  | -2.966397 | -2.324673 | -3.761776 |
| H  | -5.254782 | -2.081807 | -3.555303 |
| O  | -1.842330 | 0.026632  | -2.294899 |
| H  | -6.483714 | -1.667950 | -2.339369 |
| H  | -3.656253 | -3.964148 | -3.594404 |
| C  | -2.944805 | -3.244928 | -3.161673 |
| C  | -5.617962 | -2.315598 | -2.545663 |
| O  | -4.053880 | -0.754412 | -1.613169 |
| B  | -2.660131 | -0.766657 | -1.437490 |
| H  | -5.966400 | -3.360126 | -2.532963 |
| Cu | -1.026678 | 0.464282  | -0.354427 |
| C  | -4.544610 | -2.090379 | -1.488862 |
| O  | -2.227137 | -2.087732 | -1.195677 |
| C  | -3.244118 | -2.955137 | -1.687830 |
| H  | -5.925429 | -1.488523 | 0.037636  |
| B  | -2.703175 | 0.331249  | 0.831966  |
| C  | -5.146123 | -2.252966 | -0.097997 |
| O  | -3.377438 | 1.534487  | 1.015534  |
| C  | -3.237277 | -4.258945 | -0.902687 |
| H  | -4.082852 | -4.897468 | -1.202744 |
| H  | -5.610783 | -3.240744 | 0.038228  |
| H  | -4.380493 | -2.100784 | 0.673785  |
| H  | -3.297324 | -4.080625 | 0.177373  |
| O  | -2.957981 | -0.494183 | 1.914664  |
| C  | -3.913422 | 1.630029  | 2.340679  |
| H  | -5.316183 | 3.175776  | 1.808900  |
| H  | -5.965398 | 1.538664  | 1.592388  |
| C  | -5.338151 | 2.164046  | 2.240790  |
| H  | -5.670200 | -0.542146 | 1.996150  |
| C  | -3.795816 | 0.146806  | 2.887966  |
| C  | -5.129419 | -0.593779 | 2.947267  |
| H  | -4.947820 | -1.654565 | 3.176483  |
| H  | -5.812130 | 2.228457  | 3.231782  |
| C  | -3.106952 | 0.022631  | 4.243119  |
| H  | -3.021956 | -1.041101 | 4.511898  |
| H  | -5.776252 | -0.181749 | 3.735777  |
| H  | -3.682611 | 0.528349  | 5.032880  |
| H  | -1.934133 | -3.671833 | -3.239881 |
| H  | -2.309256 | -4.816302 | -1.100496 |
| H  | -3.121756 | 3.619837  | 2.622647  |
| C  | -3.055428 | 2.635704  | 3.110549  |
| H  | -3.398548 | 2.752927  | 4.148882  |
| H  | -1.998172 | 2.338012  | 3.123185  |
| H  | -2.094743 | 0.444130  | 4.222265  |

140

Figure 1\_ts(TB)\_02 / electronic energy: -5322.36659501 a.u. / lowest freq: -95.28 cm-1

|   |           |           |           |
|---|-----------|-----------|-----------|
| F | 0.265119  | -1.141472 | 1.346455  |
| C | -1.418511 | 0.443284  | 2.852114  |
| C | -2.148263 | 0.844838  | 3.967495  |
| C | -0.515889 | -0.622615 | 2.929029  |
| C | -1.974132 | 0.183491  | 5.183475  |
| C | -0.353508 | -1.288355 | 4.148938  |
| C | -1.076881 | -0.881367 | 5.270438  |
| C | 3.649260  | -2.655958 | 3.085660  |
| C | 2.552010  | -1.859938 | 2.769974  |
| C | 1.594447  | -2.300325 | 1.845434  |
| C | 3.817631  | -3.895628 | 2.466935  |
| C | 2.883402  | -4.329755 | 1.528664  |
| C | 1.780102  | -3.535022 | 1.215620  |
| C | -1.590692 | -3.464309 | 1.255935  |
| C | -1.056396 | -2.168162 | 0.659709  |
| C | -1.881238 | -1.821989 | -0.350270 |
| C | -2.915743 | -3.079548 | 1.972755  |
| C | -3.851097 | -2.740147 | 0.792356  |
| C | -2.943889 | -2.929004 | -0.463384 |
| C | -3.679124 | -3.009832 | -1.784419 |
| C | -2.108692 | -4.185293 | -0.020824 |
| C | -2.942680 | -5.439445 | 0.263104  |
| C | -1.018717 | -4.603969 | -1.008546 |
| C | -1.828097 | -0.628695 | -1.234640 |
| C | -0.932095 | -0.571361 | -2.277243 |
| C | -2.718232 | 0.522732  | -1.198499 |
| S | -1.173953 | 0.857055  | -3.214717 |
| C | -2.479088 | 1.407300  | -2.231098 |
| C | 0.116816  | -1.556938 | -2.683413 |
| C | -3.144693 | 2.702665  | -2.585829 |
| P | -3.967278 | 0.716929  | 0.129864  |
| C | -5.485755 | 4.576395  | 0.380156  |
| C | -5.375571 | 3.209973  | 0.119932  |
| C | -4.390692 | 5.294115  | 0.859302  |
| C | -4.165653 | 2.538518  | 0.334921  |
| C | -3.183072 | 4.632651  | 1.085501  |
| C | -3.076164 | 3.266543  | 0.834502  |
| C | -7.850503 | -0.475854 | -0.373693 |
| C | -6.623496 | -0.079533 | 0.155871  |
| C | -8.011132 | -0.584887 | -1.755406 |
| C | -5.545473 | 0.230966  | -0.686211 |
| C | -6.941626 | -0.291831 | -2.601337 |
| C | -5.717081 | 0.114797  | -2.070686 |
| H | -1.575327 | 0.943527  | 1.895232  |

|    |           |           |           |
|----|-----------|-----------|-----------|
| H  | -2.857098 | 1.671990  | 3.882207  |
| H  | -2.540993 | 0.494982  | 6.063991  |
| H  | 0.330824  | -2.135269 | 4.230743  |
| H  | -0.941832 | -1.406771 | 6.218730  |
| H  | 4.384457  | -2.300271 | 3.810976  |
| H  | 2.442921  | -0.881296 | 3.244901  |
| H  | 4.681595  | -4.517926 | 2.711539  |
| H  | 3.012537  | -5.292830 | 1.029335  |
| H  | 1.068067  | -3.882345 | 0.466270  |
| H  | -0.886842 | -4.026278 | 1.884524  |
| H  | -2.767986 | -2.229179 | 2.652064  |
| H  | -3.293187 | -3.917885 | 2.575827  |
| H  | -4.243946 | -1.720354 | 0.853989  |
| H  | -4.716692 | -3.416277 | 0.732628  |
| H  | -4.370634 | -3.866853 | -1.793971 |
| H  | -2.980766 | -3.121992 | -2.628378 |
| H  | -4.275966 | -2.103675 | -1.962214 |
| H  | -2.298868 | -6.220487 | 0.698117  |
| H  | -3.356312 | -5.844878 | -0.673832 |
| H  | -3.780798 | -5.285059 | 0.953346  |
| H  | -0.423224 | -5.430210 | -0.588917 |
| H  | -0.332678 | -3.791583 | -1.268213 |
| H  | -1.468130 | -4.973676 | -1.943897 |
| H  | -0.304817 | -2.366597 | -3.301169 |
| H  | 0.580103  | -2.004891 | -1.794310 |
| H  | 0.921846  | -1.063449 | -3.240397 |
| H  | -2.776675 | 3.530424  | -1.959707 |
| H  | -4.231449 | 2.641671  | -2.443722 |
| H  | -2.953310 | 2.965440  | -3.636137 |
| H  | -6.436974 | 5.083462  | 0.201021  |
| H  | -6.242073 | 2.670708  | -0.268889 |
| H  | -4.478660 | 6.364584  | 1.058684  |
| H  | -2.317246 | 5.181049  | 1.464646  |
| H  | -2.120813 | 2.769813  | 1.014459  |
| H  | -8.680359 | -0.712329 | 0.296456  |
| H  | -6.499453 | -0.011155 | 1.240903  |
| H  | -8.968305 | -0.906157 | -2.172905 |
| H  | -7.058951 | -0.383418 | -3.683701 |
| H  | -4.884049 | 0.329665  | -2.743898 |
| H  | -0.586704 | 4.659723  | -0.561602 |
| H  | -0.015254 | 4.002658  | 1.841903  |
| H  | -0.624272 | 2.916309  | -0.954726 |
| C  | 0.021393  | 3.804563  | -0.892861 |
| H  | 1.578038  | 5.632708  | 0.439176  |
| H  | 0.041645  | 2.271329  | 1.404636  |
| C  | 0.631477  | 3.197853  | 1.459704  |
| H  | 0.406627  | 4.014214  | -1.902085 |
| C  | 1.172387  | 3.531743  | 0.070471  |
| H  | 1.451567  | 3.028673  | 2.169710  |
| C  | 2.121379  | 4.725785  | 0.131926  |
| H  | 2.580236  | 4.911053  | -0.850423 |
| H  | 2.919291  | 4.544027  | 0.864906  |
| H  | 4.769064  | 3.852190  | 2.465075  |
| H  | 4.946253  | 4.485367  | 0.356533  |
| O  | 1.833638  | 2.385223  | -0.474333 |
| H  | 5.992096  | 4.093910  | -1.021113 |
| H  | 6.244451  | 2.902395  | 2.792015  |
| C  | 5.156214  | 2.839487  | 2.639479  |
| C  | 5.763799  | 3.833850  | 0.023470  |
| O  | 4.281692  | 2.164574  | -0.807062 |
| B  | 3.105420  | 1.873018  | -0.078955 |
| H  | 6.653940  | 4.051751  | 0.632299  |
| Cu | 1.508076  | 0.234996  | 0.026254  |
| C  | 5.380243  | 2.353502  | 0.083271  |
| O  | 3.406489  | 1.918790  | 1.300853  |
| C  | 4.813177  | 1.892329  | 1.493531  |
| H  | 6.934782  | 1.897437  | -1.353101 |
| B  | 3.169156  | -0.159690 | -1.163006 |
| C  | 6.570108  | 1.522538  | -0.384435 |
| O  | 2.979632  | -0.122150 | -2.540219 |
| C  | 5.217514  | 0.469887  | 1.888411  |
| H  | 6.298155  | 0.389972  | 2.078699  |
| H  | 7.401618  | 1.592315  | 0.333455  |
| H  | 6.288614  | 0.470256  | -0.502420 |
| H  | 4.936203  | -0.258451 | 1.116538  |
| O  | 4.231789  | -1.012885 | -0.876813 |
| C  | 4.056419  | -0.803365 | -3.197485 |
| H  | 4.560929  | 0.975801  | -4.295744 |
| H  | 5.431465  | 0.820561  | -2.759985 |
| C  | 5.064729  | 0.260106  | -3.629198 |
| H  | 6.657679  | -1.042398 | -2.019164 |
| C  | 4.589095  | -1.739896 | -2.059747 |
| C  | 6.090990  | -1.979886 | -2.080228 |
| H  | 6.379668  | -2.607813 | -1.223612 |
| H  | 5.917022  | -0.175705 | -4.171429 |
| C  | 3.853208  | -3.079794 | -1.994442 |
| H  | 4.119274  | -3.583762 | -1.054041 |
| H  | 6.387955  | -2.504729 | -3.001371 |
| H  | 4.123174  | -3.740680 | -2.831462 |
| H  | 4.706188  | 2.465031  | 3.571451  |
| H  | 4.694288  | 0.207458  | 2.819507  |
| H  | 3.134280  | -0.806703 | -5.149624 |
| C  | 3.523805  | -1.534941 | -4.422066 |
| H  | 4.327677  | -2.105256 | -4.913254 |
| H  | 2.711580  | -2.229463 | -4.171420 |
| H  | 2.762793  | -2.932699 | -1.998677 |

Figure 1\_ts(TB)\_03 / electronic energy: -5322.37581050 a.u. / lowest freq: -110.98 cm<sup>-1</sup>

|   |           |           |           |
|---|-----------|-----------|-----------|
| P | -1.491735 | 1.190092  | 1.171624  |
| C | -0.294720 | 3.700702  | 1.414231  |
| C | -0.264164 | 5.072734  | 1.680008  |
| C | -1.491329 | 2.990162  | 1.528115  |
| C | -1.428037 | 5.740087  | 2.050084  |
| C | -2.662466 | 3.669578  | 1.899142  |
| C | -2.631858 | 5.036064  | 2.156057  |
| C | -3.468256 | -1.311322 | 3.796501  |
| C | -2.971186 | -0.731966 | 2.630081  |
| C | -2.328522 | 0.511921  | 2.664885  |
| C | -3.322468 | -0.662281 | 5.021739  |
| C | -2.678353 | 0.573361  | 5.068709  |
| C | -2.183244 | 1.155339  | 3.902702  |
| C | -2.807844 | 2.260281  | -1.176845 |
| C | -2.636910 | 1.068048  | -0.241382 |
| C | -3.136144 | -0.010025 | -0.884665 |
| C | -1.763837 | 2.022707  | -2.294947 |
| C | -2.332448 | 0.787385  | -3.020688 |
| C | -3.660493 | 0.485986  | -2.248951 |
| C | -4.611337 | -0.397767 | -3.029875 |
| C | -4.143175 | 1.925359  | -1.879351 |
| C | -4.462969 | 2.808819  | -3.089254 |
| C | -5.347627 | 1.996580  | -0.936923 |
| C | -3.111139 | -1.465967 | -0.606107 |
| C | -4.278054 | -2.158730 | -0.378635 |
| C | -1.957188 | -2.342140 | -0.729901 |
| S | -3.997927 | -3.861182 | -0.400813 |
| C | -2.307379 | -3.677508 | -0.699384 |
| C | -5.639565 | -1.632228 | -0.054924 |
| C | -1.489059 | -4.918393 | -0.889530 |
| P | -0.214963 | -1.749560 | -0.696263 |
| C | 0.539771  | -4.267307 | 2.437796  |
| C | 0.012051  | -3.295726 | 1.592654  |
| C | 1.655234  | -5.006812 | 2.042501  |
| C | 0.569362  | -3.064893 | 0.330204  |
| C | 2.230381  | -4.764651 | 0.796282  |
| C | 1.692851  | -3.798193 | -0.054623 |
| C | 2.242325  | -1.941853 | -3.967832 |
| C | 1.736437  | -1.738587 | -2.685056 |
| C | 1.415964  | -2.418859 | -4.986589 |
| C | 0.399668  | -2.052331 | -2.398541 |
| C | 0.079228  | -2.706057 | -4.713456 |
| C | -0.424825 | -2.531101 | -3.424236 |
| H | 0.619113  | 3.188455  | 1.101682  |
| H | 0.679137  | 5.616894  | 1.593024  |
| H | -1.403037 | 6.812946  | 2.256022  |
| H | -3.606446 | 3.124036  | 1.984183  |
| H | -3.548950 | 5.557321  | 2.440440  |
| H | -3.967645 | -2.281589 | 3.741373  |
| H | -3.081737 | -1.264203 | 1.686599  |
| H | -3.708271 | -1.117938 | 5.936555  |
| H | -2.552470 | 1.090835  | 6.022613  |
| H | -1.669673 | 2.116057  | 3.969983  |
| H | -2.749582 | 3.249438  | -0.708792 |
| H | -0.763934 | 1.842141  | -1.880700 |
| H | -1.702009 | 2.898880  | -2.956012 |
| H | -1.653629 | -0.075813 | -2.985920 |
| H | -2.538869 | 0.986216  | -4.082927 |
| H | -4.831407 | 0.063087  | -4.005411 |
| H | -5.567463 | -0.552149 | -2.510437 |
| H | -4.169628 | -1.387153 | -3.224827 |
| H | -4.565791 | 3.859692  | -2.774219 |
| H | -5.423173 | 2.507197  | -3.536847 |
| H | -3.706353 | 2.774757  | -3.883142 |
| H | -5.578815 | 3.049574  | -0.709745 |
| H | -5.178173 | 1.485273  | 0.019588  |
| H | -6.244377 | 1.561652  | -1.406828 |
| H | -5.675852 | -0.546919 | -0.201378 |
| H | -5.891929 | -1.830070 | 0.999862  |
| H | -6.423603 | -2.091785 | -0.675638 |
| H | -1.111915 | -5.312433 | 0.067125  |
| H | -0.624140 | -4.724158 | -1.535786 |
| H | -2.092993 | -5.706810 | -1.362575 |
| H | 0.080534  | -4.441552 | 3.413842  |
| H | -0.857164 | -2.718377 | 1.918739  |
| H | 2.074004  | -5.768049 | 2.705038  |
| H | 3.105584  | -5.335802 | 0.477080  |
| H | 2.153392  | -3.633296 | -1.029524 |
| H | 3.290614  | -1.713138 | -4.175767 |
| H | 2.378237  | -1.334565 | -1.897248 |
| H | 1.814090  | -2.564042 | -5.993933 |
| H | -0.578034 | -3.074229 | -5.504924 |
| H | -1.471398 | -2.768113 | -3.220016 |
| H | 0.681637  | 1.639782  | 3.063101  |
| H | 2.445464  | 1.898838  | 3.026200  |
| O | 1.881204  | -0.515411 | 1.924305  |
| C | 1.638022  | 1.329043  | 3.505461  |
| H | 1.613650  | 1.582241  | 4.576690  |
| C | 1.850966  | -0.174269 | 3.317647  |
| H | -0.236597 | -0.771370 | 3.348819  |
| H | 3.997331  | -0.036769 | 3.672964  |
| C | 0.682771  | -0.949270 | 3.919606  |
| C | 3.137598  | -0.623636 | 4.012848  |
| H | 0.890405  | -2.027318 | 3.908827  |
| H | 0.508689  | -0.639434 | 4.961128  |
| H | 3.325423  | -1.688755 | 3.808572  |

|    |          |           |           |
|----|----------|-----------|-----------|
| H  | 3.034690 | -0.500573 | 5.102433  |
| Cu | 0.486896 | 0.266453  | 0.452052  |
| H  | 4.586852 | 3.608430  | -1.799049 |
| H  | 4.017022 | 2.509323  | -4.065456 |
| H  | 4.326378 | 1.518299  | -2.622253 |
| C  | 3.583129 | 1.757708  | -3.389766 |
| H  | 3.703067 | 4.752513  | -2.839316 |
| H  | 3.394472 | 0.843153  | -3.970334 |
| C  | 3.682193 | 4.223731  | -1.873943 |
| H  | 3.721018 | 4.978606  | -1.074383 |
| C  | 2.405643 | 3.403540  | -1.740581 |
| C  | 2.260600 | 2.238402  | -2.791433 |
| O  | 2.417413 | 2.704913  | -0.485615 |
| H  | 1.710035 | 3.330693  | -4.586601 |
| B  | 1.893925 | 1.426588  | -0.633999 |
| H  | 1.207514 | 1.621907  | -4.565058 |
| C  | 1.311015 | 2.527487  | -3.948209 |
| O  | 1.724607 | 1.176784  | -1.993166 |
| H  | 1.134520 | 4.937161  | -2.648469 |
| C  | 1.204919 | 4.350473  | -1.720762 |
| H  | 1.312712 | 5.053948  | -0.882427 |
| H  | 0.312181 | 2.818317  | -3.611676 |
| H  | 0.262295 | 3.804361  | -1.578979 |
| H  | 5.905580 | -0.469709 | 2.720756  |
| H  | 4.563685 | -2.130956 | 2.018471  |
| H  | 6.324912 | 1.230403  | 2.422667  |
| C  | 6.174921 | 0.252437  | 1.940352  |
| O  | 3.875987 | 0.770981  | 1.458528  |
| H  | 6.119534 | -2.374858 | 1.173576  |
| C  | 5.039607 | -2.217986 | 1.032570  |
| H  | 7.135137 | -0.057617 | 1.499363  |
| B  | 2.802334 | 0.004740  | 0.947000  |
| H  | 4.623973 | -3.110996 | 0.544202  |
| C  | 5.102222 | 0.376715  | 0.860492  |
| C  | 4.738683 | -0.996732 | 0.158891  |
| O  | 3.332439 | -0.912628 | -0.007588 |
| H  | 5.625762 | 2.418571  | 0.435378  |
| C  | 5.522647 | 1.471661  | -0.114383 |
| H  | 6.478039 | 1.251544  | -0.612885 |
| H  | 4.745889 | 1.620373  | -0.867630 |
| H  | 6.482795 | -1.184273 | -1.135861 |
| C  | 5.384139 | -1.194667 | -1.208344 |
| H  | 5.083571 | -2.169732 | -1.621585 |
| H  | 5.072409 | -0.418651 | -1.918619 |

140

Figure 1\_prod / electronic energy: -5322.40355860 a.u. / lowest freq: 15.23 cm<sup>-1</sup>

|   |           |           |           |
|---|-----------|-----------|-----------|
| P | -2.230426 | 1.028195  | 1.095577  |
| C | -1.651810 | 3.717648  | 1.506724  |
| C | -1.927669 | 5.042592  | 1.849269  |
| C | -2.642103 | 2.736807  | 1.630708  |
| C | -3.191280 | 5.392861  | 2.322129  |
| C | -3.907653 | 3.093408  | 2.114707  |
| C | -4.180813 | 4.415890  | 2.457285  |
| C | -4.875807 | -1.381604 | 3.190170  |
| C | -4.332201 | -0.570419 | 2.194168  |
| C | -3.059300 | -0.013103 | 2.353290  |
| C | -4.158276 | -1.633904 | 4.359084  |
| C | -2.894254 | -1.067796 | 4.533322  |
| C | -2.345827 | -0.267589 | 3.533234  |
| C | -3.362223 | 1.999052  | -1.421041 |
| C | -3.163433 | 0.840933  | -0.450510 |
| C | -3.457707 | -0.296812 | -1.117276 |
| C | -2.188423 | 1.894016  | -2.429974 |
| C | -2.509021 | 0.576531  | -3.168501 |
| C | -3.869120 | 0.116315  | -2.540969 |
| C | -4.613023 | -0.888349 | -3.396116 |
| C | -4.563146 | 1.491466  | -2.259906 |
| C | -4.854582 | 2.312581  | -3.520255 |
| C | -5.867202 | 1.420576  | -1.460667 |
| C | -3.285223 | -1.717228 | -0.728598 |
| C | -4.360847 | -2.559958 | -0.571428 |
| C | -2.014310 | -2.411277 | -0.587646 |
| S | -3.840316 | -4.184072 | -0.298128 |
| C | -2.167389 | -3.767184 | -0.387895 |
| C | -5.823189 | -2.245795 | -0.562901 |
| C | -1.152519 | -4.859706 | -0.242055 |
| P | -0.406026 | -1.538181 | -0.530498 |
| C | 0.503941  | -3.274914 | 3.061593  |
| C | -0.138368 | -2.627199 | 2.010138  |
| C | 1.800191  | -3.765519 | 2.892641  |
| C | 0.500990  | -2.467141 | 0.772829  |
| C | 2.447972  | -3.587971 | 1.671552  |
| C | 1.806759  | -2.936789 | 0.617875  |
| C | 2.290856  | -1.503996 | -3.599650 |
| C | 1.623907  | -1.270190 | -2.398904 |
| C | 1.765286  | -2.397399 | -4.533835 |
| C | 0.431574  | -1.949619 | -2.109080 |
| C | 0.568969  | -3.060230 | -4.260681 |
| C | -0.094944 | -2.839073 | -3.053774 |
| H | -0.662376 | 3.439033  | 1.130372  |
| H | -1.149157 | 5.802422  | 1.747054  |
| H | -3.407651 | 6.430222  | 2.588946  |
| H | -4.687464 | 2.334422  | 2.222094  |
| H | -5.171066 | 4.687447  | 2.830952  |
| H | -5.867545 | -1.819087 | 3.051704  |
| H | -4.898264 | -0.375444 | 1.282123  |
| H | -4.584050 | -2.273068 | 5.136199  |

|    |           |           |           |
|----|-----------|-----------|-----------|
| H  | -2.328278 | -1.258581 | 5.448147  |
| H  | -1.346635 | 0.157643  | 3.664939  |
| H  | -3.480324 | 2.987989  | -0.957109 |
| H  | -1.215700 | 1.878749  | -1.920068 |
| H  | -2.185391 | 2.756542  | -3.112339 |
| H  | -1.735232 | -0.192673 | -3.028143 |
| H  | -2.617221 | 0.723673  | -4.253764 |
| H  | -4.757222 | -0.487024 | -4.411401 |
| H  | -5.604940 | -1.130840 | -2.989954 |
| H  | -4.047699 | -1.828850 | -3.490178 |
| H  | -5.061508 | 3.361328  | -3.252461 |
| H  | -5.751790 | 1.922882  | -4.026605 |
| H  | -4.040192 | 2.313054  | -4.255552 |
| H  | -6.267236 | 2.435654  | -1.308460 |
| H  | -5.741393 | 0.967611  | -0.468754 |
| H  | -6.635022 | 0.848382  | -2.006108 |
| H  | -5.984987 | -1.173574 | -0.722411 |
| H  | -6.279376 | -2.514762 | 0.403012  |
| H  | -6.367387 | -2.793158 | -1.348339 |
| H  | -0.907418 | -5.043620 | 0.816063  |
| H  | -0.219051 | -4.606999 | -0.759874 |
| H  | -1.531731 | -5.800470 | -0.667916 |
| H  | -0.012086 | -3.396729 | 4.017153  |
| H  | -1.156112 | -2.254109 | 2.152167  |
| H  | 2.306064  | -4.276737 | 3.715203  |
| H  | 3.466565  | -3.957920 | 1.533424  |
| H  | 2.339627  | -2.789416 | -0.322864 |
| H  | 3.220817  | -0.971063 | -3.810207 |
| H  | 2.031279  | -0.552087 | -1.683159 |
| H  | 2.283201  | -2.569327 | -5.480529 |
| H  | 0.146584  | -3.754142 | -4.991459 |
| H  | -1.036174 | -3.356690 | -2.854617 |
| H  | 3.230991  | 2.454062  | 2.133522  |
| H  | 4.765051  | 1.745681  | 2.735825  |
| O  | 3.151109  | -0.134645 | 1.607842  |
| C  | 3.683772  | 1.830526  | 2.917676  |
| H  | 3.536239  | 2.318607  | 3.893500  |
| C  | 3.019253  | 0.455402  | 2.906546  |
| H  | 1.080815  | 1.243951  | 2.351415  |
| H  | 4.711931  | -0.600414 | 3.781177  |
| C  | 1.516302  | 0.594541  | 3.127510  |
| C  | 3.632202  | -0.478018 | 3.949663  |
| H  | 1.034287  | -0.391969 | 3.062443  |
| H  | 1.304712  | 1.029341  | 4.116303  |
| H  | 3.155076  | -1.468287 | 3.897358  |
| H  | 3.483175  | -0.073413 | 4.962297  |
| Cu | -0.182724 | 0.669801  | 0.125273  |
| H  | 4.603410  | 3.131081  | -0.036328 |
| H  | 4.675645  | 2.700111  | -2.500258 |
| H  | 3.862138  | 1.466219  | -1.487042 |
| C  | 3.730756  | 2.163053  | -2.327285 |
| H  | 4.620462  | 4.704423  | -0.881007 |
| H  | 3.508301  | 1.563347  | -3.222597 |
| C  | 4.056139  | 4.072616  | -0.177024 |
| H  | 4.027112  | 4.592807  | 0.792472  |
| C  | 2.640816  | 3.824086  | -0.679749 |
| C  | 2.558732  | 3.112895  | -2.071767 |
| O  | 1.990373  | 2.880398  | 0.177060  |
| H  | 3.222141  | 4.758463  | -3.329802 |
| B  | 1.159918  | 2.035075  | -0.571021 |
| H  | 2.348273  | 3.469510  | -4.192205 |
| C  | 2.382030  | 4.050123  | -3.257646 |
| O  | 1.392121  | 2.299585  | -1.925755 |
| H  | 2.302205  | 5.930008  | -1.200676 |
| C  | 1.830985  | 5.120895  | -0.622497 |
| H  | 1.756514  | 5.448026  | 0.425661  |
| H  | 1.446887  | 4.621359  | -3.185934 |
| H  | 0.809272  | 4.968105  | -1.001296 |
| H  | 7.479042  | -2.101103 | 1.385783  |
| H  | 5.473742  | -3.020139 | 0.687429  |
| H  | 8.285376  | -0.521961 | 1.509763  |
| C  | 7.723057  | -1.183640 | 0.834230  |
| O  | 5.570790  | -0.283471 | 1.440639  |
| H  | 6.609323  | -3.248909 | -0.669630 |
| C  | 5.643598  | -2.810950 | -0.379197 |
| H  | 8.381351  | -1.444386 | -0.008233 |
| B  | 4.288900  | -0.400580 | 0.949210  |
| H  | 4.852615  | -3.310834 | -0.957692 |
| C  | 6.473869  | -0.474044 | 0.338769  |
| C  | 5.595047  | -1.310336 | -0.663449 |
| O  | 4.269503  | -0.858702 | -0.350298 |
| H  | 7.236898  | 1.520241  | 0.619178  |
| C  | 6.831850  | 0.909264  | -0.200900 |
| H  | 7.590472  | 0.852226  | -0.994763 |
| H  | 5.946239  | 1.421708  | -0.601941 |
| H  | 6.940187  | -1.275757 | -2.360682 |
| C  | 5.888410  | -1.047016 | -2.131135 |
| H  | 5.256849  | -1.692620 | -2.758747 |
| H  | 5.688781  | -0.003118 | -2.405294 |

105

Figure 1 L-Cu-Bpin\_01 / electronic energy: -4678.61224218 a.u. / lowest freq: 16.61 cm-1

|   |          |          |           |
|---|----------|----------|-----------|
| B | 2.903937 | 1.409851 | -0.190721 |
| O | 3.654199 | 1.302372 | -1.370038 |
| O | 3.780912 | 1.706601 | 0.853711  |
| C | 5.052096 | 1.265797 | -1.054595 |
| C | 5.092458 | 1.972105 | 0.343560  |
| C | 5.831949 | 1.973287 | -2.153778 |

|   |           |           |           |
|---|-----------|-----------|-----------|
| C | 5.469164  | -0.204988 | -0.989202 |
| C | 5.246667  | 3.490698  | 0.241145  |
| C | 6.125418  | 1.414257  | 1.313151  |
| H | 4.517756  | 3.918309  | -0.463300 |
| H | 6.258290  | 3.781222  | -0.080250 |
| H | 5.060897  | 3.937070  | 1.229565  |
| H | 5.936564  | 0.356485  | 1.539522  |
| H | 6.084994  | 1.971592  | 2.261322  |
| H | 7.143717  | 1.512418  | 0.905605  |
| H | 4.914542  | -0.741000 | -0.204616 |
| H | 6.546600  | -0.319166 | -0.797494 |
| H | 5.244504  | -0.688220 | -1.951752 |
| H | 6.901391  | 2.041899  | -1.900542 |
| H | 5.449375  | 2.986731  | -2.333139 |
| H | 5.742681  | 1.410797  | -3.095644 |
| P | -1.204385 | 1.569151  | 0.529892  |
| C | -0.654849 | 4.228046  | -0.054740 |
| C | -0.949744 | 5.577953  | -0.253750 |
| C | -1.654637 | 3.339849  | 0.353330  |
| C | -2.245016 | 6.046333  | -0.040962 |
| C | -2.953804 | 3.817434  | 0.570667  |
| C | -3.246757 | 5.164606  | 0.373348  |
| C | -3.891682 | 0.222494  | 3.377474  |
| C | -3.332209 | 0.574795  | 2.150239  |
| C | -2.026775 | 1.074770  | 2.086745  |
| C | -3.157387 | 0.377780  | 4.553410  |
| C | -1.861108 | 0.891184  | 4.500449  |
| C | -1.296846 | 1.233644  | 3.272783  |
| C | -2.183931 | 1.454323  | -2.190990 |
| C | -2.105001 | 0.783487  | -0.829220 |
| C | -2.435375 | -0.514539 | -1.000789 |
| C | -0.966542 | 0.884846  | -2.972695 |
| C | -1.369640 | -0.591693 | -3.177828 |
| C | -2.771950 | -0.694942 | -2.492128 |
| C | -3.554231 | -1.924546 | -2.903995 |
| C | -3.381273 | 0.707414  | -2.830222 |
| C | -3.565271 | 0.973871  | -4.326924 |
| C | -4.718523 | 1.013362  | -2.150602 |
| C | -2.320371 | -1.651616 | -0.056162 |
| C | -3.416678 | -2.331898 | 0.416370  |
| C | -1.067312 | -2.222648 | 0.413697  |
| S | -2.935103 | -3.666378 | 1.403283  |
| C | -1.250247 | -3.343546 | 1.193605  |
| C | -4.870712 | -2.035149 | 0.229331  |
| C | -0.256710 | -4.263284 | 1.834947  |
| P | 0.535809  | -1.429013 | 0.043897  |
| C | 1.945753  | -1.459225 | 3.880444  |
| C | 1.138188  | -1.341371 | 2.752504  |
| C | 3.222450  | -2.013879 | 3.772696  |
| C | 1.590008  | -1.786799 | 1.502813  |
| C | 3.680541  | -2.451725 | 2.530961  |
| C | 2.870854  | -2.337390 | 1.399716  |
| C | 2.870213  | -2.469336 | -3.137808 |
| C | 2.290445  | -1.799898 | -2.061349 |
| C | 2.415075  | -3.736162 | -3.503794 |
| C | 1.260198  | -2.404223 | -1.326225 |
| C | 1.378379  | -4.334360 | -2.786809 |
| C | 0.802917  | -3.673470 | -1.701554 |
| H | 0.358933  | 3.849407  | -0.218720 |
| H | -0.163004 | 6.264763  | -0.574381 |
| H | -2.476742 | 7.102878  | -0.195530 |
| H | -3.743250 | 3.134490  | 0.895384  |
| H | -4.262149 | 5.530850  | 0.542819  |
| H | -4.908793 | -0.174813 | 3.415648  |
| H | -3.912276 | 0.455983  | 1.233725  |
| H | -3.597842 | 0.100006  | 5.513847  |
| H | -1.283637 | 1.019973  | 5.418775  |
| H | -0.275425 | 1.623361  | 3.233145  |
| H | -2.248474 | 2.550831  | -2.178354 |
| H | -0.036079 | 0.999905  | -2.393823 |
| H | -0.825760 | 1.412161  | -3.927146 |
| H | -0.661116 | -1.300819 | -2.730177 |
| H | -1.447119 | -0.853729 | -4.243595 |
| H | -3.648468 | -1.965703 | -4.000353 |
| H | -4.569150 | -1.934965 | -2.482177 |
| H | -3.045489 | -2.846508 | -2.581412 |
| H | -3.786446 | 2.040067  | -4.495241 |
| H | -4.420470 | 0.398132  | -4.715016 |
| H | -2.692419 | 0.718487  | -4.941148 |
| H | -5.030031 | 2.044369  | -2.381941 |
| H | -4.677726 | 0.920995  | -1.057753 |
| H | -5.509384 | 0.342029  | -2.521709 |
| H | -5.000656 | -1.118788 | -0.359095 |
| H | -5.372285 | -1.885010 | 1.198505  |
| H | -5.394903 | -2.853358 | -0.288867 |
| H | 0.032360  | -3.910873 | 2.837779  |
| H | 0.659281  | -4.335778 | 1.234393  |
| H | -0.674291 | -5.275009 | 1.942559  |
| H | 1.575907  | -1.110036 | 4.847645  |
| H | 0.141185  | -0.903448 | 2.846822  |
| H | 3.859383  | -2.102371 | 4.655854  |
| H | 4.677884  | -2.888163 | 2.436620  |
| H | 3.244868  | -2.687636 | 0.434834  |
| H | 3.673475  | -1.989530 | -3.702359 |
| H | 2.637259  | -0.797234 | -1.793129 |
| H | 2.862587  | -4.254375 | -4.355296 |
| H | 1.011340  | -5.322311 | -3.075119 |

|    |           |           |           |
|----|-----------|-----------|-----------|
| H  | -0.017178 | -4.146224 | -1.155803 |
| Cu | 0.947081  | 0.898099  | 0.075579  |

105

Figure 1 L-Cu-Bpin\_O2 / electronic energy: -4678.61215750 a.u. / lowest freq: 15.20 cm-1

|    |           |           |           |
|----|-----------|-----------|-----------|
| F  | 0.470019  | -1.480454 | 0.027699  |
| Cu | 0.994592  | 0.820724  | 0.173853  |
| P  | -1.136365 | 1.578912  | 0.591894  |
| B  | 2.958703  | 1.323387  | -0.086736 |
| O  | 3.724121  | 1.007135  | -1.220260 |
| O  | 3.820374  | 1.849489  | 0.877159  |
| C  | 5.116755  | 1.052101  | -0.886478 |
| C  | 5.123373  | 2.052368  | 0.315182  |
| C  | 5.915393  | 1.496980  | -2.102553 |
| C  | 5.533337  | -0.362865 | -0.476904 |
| C  | 5.208150  | 3.513644  | -0.130450 |
| C  | 6.179748  | 1.774036  | 1.375082  |
| H  | 4.472092  | 3.732107  | -0.918406 |
| H  | 6.210142  | 3.773330  | -0.503889 |
| H  | 4.982555  | 4.162866  | 0.728761  |
| H  | 6.034287  | 0.792617  | 1.845970  |
| H  | 6.125502  | 2.537352  | 2.166029  |
| H  | 7.190995  | 1.809824  | 0.940599  |
| H  | 4.980788  | -0.693223 | 0.415193  |
| H  | 6.611525  | -0.430918 | -0.268523 |
| H  | 5.300351  | -1.060067 | -1.295799 |
| H  | 6.976412  | 1.643443  | -1.847014 |
| H  | 5.524681  | 2.432624  | -2.524460 |
| H  | 5.860837  | 0.726607  | -2.886957 |
| C  | -0.445171 | 4.223742  | 0.115042  |
| C  | -0.665886 | 5.593425  | -0.037872 |
| C  | -1.494265 | 3.376223  | 0.485026  |
| C  | -1.935800 | 6.122967  | 0.184126  |
| C  | -2.767402 | 3.915176  | 0.712296  |
| C  | -2.986257 | 5.282522  | 0.561740  |
| C  | -3.976821 | 0.234523  | 3.287832  |
| C  | -3.366862 | 0.631580  | 2.099069  |
| C  | -2.028942 | 1.042416  | 2.094914  |
| C  | -3.259152 | 0.253335  | 4.484162  |
| C  | -1.929042 | 0.674240  | 4.490814  |
| C  | -1.315602 | 1.062997  | 3.300933  |
| C  | -2.023766 | 1.629805  | -2.166176 |
| C  | -2.027516 | 0.902979  | -0.830928 |
| C  | -2.416925 | -0.368001 | -1.065887 |
| C  | -0.809624 | 1.025629  | -2.927636 |
| C  | -1.282664 | -0.417260 | -3.208936 |
| C  | -2.710608 | -0.472930 | -2.573352 |
| C  | -3.539256 | -1.643997 | -3.058483 |
| C  | -3.234751 | 0.971334  | -2.874536 |
| C  | -3.352849 | 1.303307  | -4.365046 |
| C  | -4.578183 | 1.320061  | -2.228509 |
| C  | -2.390510 | -1.548169 | -0.169733 |
| C  | -3.534794 | -2.190428 | 0.236542  |
| C  | -1.183321 | -2.209955 | 0.302271  |
| S  | -3.154348 | -3.601025 | 1.160265  |
| C  | -1.448614 | -3.361911 | 1.010150  |
| C  | -4.964139 | -1.802026 | 0.028553  |
| C  | -0.527128 | -4.377375 | 1.613486  |
| C  | 1.671260  | -1.856573 | 3.924389  |
| C  | 0.918875  | -1.642604 | 2.772254  |
| C  | 2.963881  | -2.375464 | 3.831108  |
| C  | 1.443504  | -1.954692 | 1.510698  |
| C  | 3.495736  | -2.676948 | 2.578063  |
| C  | 2.742468  | -2.465840 | 1.422292  |
| C  | 2.880211  | -2.518008 | -3.100153 |
| C  | 2.294701  | -1.863263 | -2.017386 |
| C  | 2.366718  | -3.735643 | -3.546663 |
| C  | 1.199580  | -2.436699 | -1.354789 |
| C  | 1.265616  | -4.300772 | -2.902525 |
| C  | 0.684285  | -3.656652 | -1.810365 |
| H  | 0.548398  | 3.798231  | -0.056327 |
| H  | 0.159081  | 6.247592  | -0.329575 |
| H  | -2.110476 | 7.194919  | 0.064945  |
| H  | -3.594841 | 3.264770  | 1.008129  |
| H  | -3.981526 | 5.697257  | 0.738332  |
| H  | -5.020001 | -0.090515 | 3.279967  |
| H  | -3.932302 | 0.615414  | 1.165688  |
| H  | -3.738560 | -0.061051 | 5.414214  |
| H  | -1.363088 | 0.692560  | 5.425107  |
| H  | -0.267667 | 1.376711  | 3.306234  |
| H  | -2.031571 | 2.726863  | -2.110367 |
| H  | 0.102514  | 1.064803  | -2.310398 |
| H  | -0.602452 | 1.581723  | -3.853226 |
| H  | -0.627980 | -1.181678 | -2.770682 |
| H  | -1.338186 | -0.630225 | -4.286825 |
| H  | -3.600511 | -1.637292 | -4.158036 |
| H  | -4.566327 | -1.619801 | -2.667637 |
| H  | -3.086205 | -2.602029 | -2.758735 |
| H  | -3.525796 | 2.383209  | -4.498353 |
| H  | -4.216188 | 0.779662  | -4.805446 |
| H  | -2.469280 | 1.036427  | -4.958735 |
| H  | -4.830500 | 2.373037  | -2.431432 |
| H  | -4.580179 | 1.186593  | -1.139218 |
| H  | -5.387637 | 0.703046  | -2.650494 |
| H  | -5.026236 | -0.863946 | -0.536436 |
| H  | -5.476069 | -1.647104 | 0.991697  |
| H  | -5.525297 | -2.573028 | -0.522130 |
| H  | -0.348670 | -4.180684 | 2.682558  |



|   |           |           |           |
|---|-----------|-----------|-----------|
| H | 0.446900  | -4.376099 | 1.109018  |
| H | -0.953306 | -5.387746 | 1.525343  |
| H | 1.243235  | -1.615183 | 4.900419  |
| H | -0.093105 | -1.238401 | 2.857204  |
| H | 3.554733  | -2.542928 | 4.734586  |
| H | 4.507178  | -3.081895 | 2.493993  |
| H | 3.176499  | -2.703679 | 0.448515  |
| H | 3.734755  | -2.062346 | -3.606601 |
| H | 2.691285  | -0.896639 | -1.690554 |
| H | 2.818700  | -4.240562 | -4.403831 |
| H | 0.851939  | -5.248853 | -3.254574 |
| H | -0.185744 | -4.102988 | -1.323203 |

105

Figure 1 L-Cu-Bpin\_03 / electronic energy: -4678.60409663 a.u. / lowest freq: 12.84 cm<sup>-1</sup>

|   |           |           |           |
|---|-----------|-----------|-----------|
| B | 3.115412  | -1.378056 | -0.250136 |
| O | 3.866910  | -0.205100 | -0.150229 |
| O | 3.970075  | -2.416685 | -0.614311 |
| C | 5.191396  | -0.425222 | -0.648049 |
| C | 5.333150  | -1.979736 | -0.518298 |
| C | 6.177250  | 0.381268  | 0.185450  |
| C | 5.224476  | 0.058484  | -2.098445 |
| C | 5.851205  | -2.418144 | 0.852893  |
| C | 6.153587  | -2.642533 | -1.615401 |
| H | 5.291749  | -1.929151 | 1.664308  |
| H | 6.920940  | -2.195162 | 0.981284  |
| H | 5.711449  | -3.504365 | 0.957167  |
| H | 5.705751  | -2.487599 | -2.605865 |
| H | 6.208412  | -3.727271 | -1.437911 |
| H | 7.182132  | -2.249670 | -1.629213 |
| H | 4.527155  | -0.515556 | -2.725340 |
| H | 6.232304  | -0.018856 | -2.533416 |
| H | 4.917680  | 1.114457  | -2.132393 |
| H | 7.214678  | 0.172228  | -0.119005 |
| H | 6.079635  | 0.163405  | 1.257171  |
| H | 5.992660  | 1.456852  | 0.042622  |
| P | -1.028488 | -1.656786 | 0.894231  |
| C | -0.191640 | -0.566121 | 3.284237  |
| C | -0.324270 | 0.029382  | 4.537907  |
| C | -1.322468 | -0.967438 | 2.561835  |
| C | -1.591630 | 0.224481  | 5.083816  |
| C | -2.592570 | -0.779259 | 3.124468  |
| C | -2.724677 | -0.185480 | 4.377975  |
| C | -1.659933 | -5.514088 | -0.251616 |
| C | -1.260861 | -4.182460 | -0.172824 |
| C | -1.582082 | -3.406258 | 0.950828  |
| C | -2.369321 | -6.092309 | 0.802632  |
| C | -2.672848 | -5.333757 | 1.932082  |
| C | -2.282632 | -3.995050 | 2.007836  |
| C | -3.764777 | -1.010652 | -0.145030 |
| C | -2.250882 | -0.938984 | -0.224629 |
| C | -1.937054 | -0.231319 | -1.328876 |
| C | -4.211550 | 0.436295  | 0.215438  |
| C | -3.867145 | 1.222345  | -1.067530 |
| C | -3.259021 | 0.141425  | -2.015487 |
| C | -3.193907 | 0.570190  | -3.466386 |
| C | -4.138433 | -1.107669 | -1.650667 |
| C | -5.631650 | -0.938486 | -1.946071 |
| C | -3.698501 | -2.418995 | -2.303823 |
| C | -0.608790 | 0.262662  | -1.760890 |
| C | 0.051954  | -0.236331 | -2.856364 |
| C | 0.110033  | 1.353325  | -1.115126 |
| S | 1.519100  | 0.635028  | -3.132855 |
| C | 1.280610  | 1.669746  | -1.769601 |
| C | -0.304606 | -1.400387 | -3.725182 |
| C | 2.331152  | 2.686971  | -1.456075 |
| P | -0.548983 | 2.096322  | 0.426763  |
| C | 2.152095  | 4.183710  | 2.784453  |
| C | 1.053307  | 3.878618  | 1.979296  |
| C | 3.157580  | 3.239934  | 2.993968  |
| C | 0.942476  | 2.620468  | 1.372860  |
| C | 3.054404  | 1.985366  | 2.392226  |
| C | 1.952984  | 1.676685  | 1.598967  |
| C | -2.816938 | 5.501480  | 0.393398  |
| C | -2.180606 | 4.313111  | 0.747072  |
| C | -2.577443 | 6.074881  | -0.855862 |
| C | -1.278546 | 3.692665  | -0.130665 |
| C | -1.696380 | 5.456738  | -1.743315 |
| C | -1.048548 | 4.274461  | -1.383380 |
| H | 0.801327  | -0.708872 | 2.849499  |
| H | 0.567288  | 0.349839  | 5.081559  |
| H | -1.700105 | 0.698547  | 6.062186  |
| H | -3.487974 | -1.093227 | 2.585060  |
| H | -3.719035 | -0.038722 | 4.806016  |
| H | -1.407395 | -6.105184 | -1.135008 |
| H | -0.687604 | -3.736521 | -0.991735 |
| H | -2.677500 | -7.138982 | 0.745927  |
| H | -3.216796 | -5.785110 | 2.765172  |
| H | -2.524996 | -3.416479 | 2.901708  |
| H | -4.170734 | -1.800766 | 0.502901  |
| H | -3.671149 | 0.815194  | 1.093551  |
| H | -5.286181 | 0.472260  | 0.445897  |
| H | -3.154577 | 2.038675  | -0.894553 |
| H | -4.757147 | 1.673548  | -1.530984 |
| H | -4.196067 | 0.850269  | -3.826903 |
| H | -2.812298 | -0.226954 | -4.120977 |
| H | -2.539989 | 1.447957  | -3.588888 |
| H | -6.199440 | -1.766238 | -1.491821 |

|    |           |           |           |
|----|-----------|-----------|-----------|
| H  | -5.812123 | -0.977753 | -3.031984 |
| H  | -6.063873 | -0.000662 | -1.575281 |
| H  | -4.315015 | -3.252619 | -1.932019 |
| H  | -2.651755 | -2.671357 | -2.097438 |
| H  | -3.832890 | -2.374230 | -3.396403 |
| H  | -1.264984 | -1.827273 | -3.413469 |
| H  | 0.454565  | -2.195175 | -3.647827 |
| H  | -0.382587 | -1.118265 | -4.786647 |
| H  | 3.094610  | 2.240684  | -0.799226 |
| H  | 1.903538  | 3.558141  | -0.943407 |
| H  | 2.827624  | 3.037742  | -2.372704 |
| H  | 2.223701  | 5.171817  | 3.245809  |
| H  | 0.284789  | 4.638655  | 1.819909  |
| H  | 4.020685  | 3.484647  | 3.617916  |
| H  | 3.838964  | 1.236940  | 2.524046  |
| H  | 1.910599  | 0.695749  | 1.117544  |
| H  | -3.513580 | 5.973290  | 1.090426  |
| H  | -2.392733 | 3.852990  | 1.716865  |
| H  | -3.084110 | 7.000006  | -1.140734 |
| H  | -1.511521 | 5.897831  | -2.725798 |
| H  | -0.367595 | 3.795774  | -2.091122 |
| Cu | 1.127770  | -1.477533 | 0.170380  |

105

Figure 1 L-Cu-Bpin\_04 / electronic energy: -4678.60278859 a.u. / lowest freq: 10.28 cm-1

|   |           |           |           |
|---|-----------|-----------|-----------|
| B | -2.989900 | 1.565349  | -0.254751 |
| O | -3.804667 | 0.434136  | -0.185608 |
| O | -3.784836 | 2.656898  | -0.601055 |
| C | -5.105204 | 0.733493  | -0.704497 |
| C | -5.170216 | 2.289268  | -0.538533 |
| C | -6.149227 | -0.042775 | 0.085272  |
| C | -5.130614 | 0.289589  | -2.167904 |
| C | -5.690877 | 2.721326  | 0.833482  |
| C | -5.934467 | 3.018816  | -1.633845 |
| H | -5.165308 | 2.192614  | 1.642777  |
| H | -6.770910 | 2.541243  | 0.940978  |
| H | -5.507374 | 3.798320  | 0.963136  |
| H | -5.478196 | 2.861072  | -2.619978 |
| H | -5.933210 | 4.101035  | -1.433566 |
| H | -6.982314 | 2.682726  | -1.673388 |
| H | -4.386501 | 0.838054  | -2.763366 |
| H | -6.121876 | 0.435345  | -2.622959 |
| H | -4.884512 | -0.781055 | -2.223923 |
| H | -7.167138 | 0.220853  | -0.241931 |
| H | -6.070520 | 0.146491  | 1.163920  |
| H | -6.010311 | -1.122521 | -0.077048 |
| P | 1.216586  | 1.811837  | 0.601177  |
| C | 0.823048  | 0.635857  | 3.095792  |
| C | 1.164800  | 0.274487  | 4.399357  |
| C | 1.679290  | 1.440942  | 2.337162  |
| C | 2.360681  | 0.725303  | 4.955610  |
| C | 2.875270  | 1.898819  | 2.906026  |
| C | 3.213301  | 1.541792  | 4.208933  |
| C | 2.881698  | 5.323953  | -0.808776 |
| C | 2.561105  | 3.973386  | -0.658665 |
| C | 1.757925  | 3.551382  | 0.404305  |
| C | 2.400235  | 6.263717  | 0.100159  |
| C | 1.590867  | 5.850267  | 1.160684  |
| C | 1.267703  | 4.504292  | 1.309672  |
| C | 3.877819  | 0.720249  | -0.221699 |
| C | 2.368093  | 0.817547  | -0.371672 |
| C | 1.987362  | -0.152961 | -1.227242 |
| C | 4.110982  | -0.582343 | 0.598666  |
| C | 3.700992  | -1.684328 | -0.401909 |
| C | 3.258362  | -0.891087 | -1.671642 |
| C | 3.148253  | -1.736599 | -2.922633 |
| C | 4.300485  | 0.282182  | -1.654890 |
| C | 5.763269  | -0.160895 | -1.768521 |
| C | 4.076528  | 1.334095  | -2.741821 |
| C | 0.616430  | -0.535540 | -1.644622 |
| C | 0.044162  | -0.022464 | -2.783287 |
| C | -0.239728 | -1.492424 | -0.965779 |
| S | -1.511141 | -0.720342 | -3.048242 |
| C | -1.430098 | -1.700676 | -1.632247 |
| C | 0.574121  | 1.024577  | -3.713672 |
| C | -2.602045 | -2.565130 | -1.290977 |
| P | 0.286891  | -2.226210 | 0.627315  |
| C | -2.776866 | -3.882370 | 2.888896  |
| C | -1.613086 | -3.746829 | 2.131043  |
| C | -3.629871 | -2.794314 | 3.074667  |
| C | -1.282812 | -2.515927 | 1.548877  |
| C | -3.305726 | -1.564654 | 2.501288  |
| C | -2.137212 | -1.425341 | 1.756871  |
| C | 2.027610  | -5.928186 | 0.831858  |
| C | 1.560240  | -4.645802 | 1.112604  |
| C | 1.776107  | -6.505116 | -0.413708 |
| C | 0.813364  | -3.930065 | 0.164224  |
| C | 1.052131  | -5.794733 | -1.370829 |
| C | 0.570782  | -4.516538 | -1.083708 |
| H | -0.119132 | 0.288593  | 2.664559  |
| H | 0.489715  | -0.357618 | 4.980693  |
| H | 2.627828  | 0.446887  | 5.977901  |
| H | 3.547485  | 2.538864  | 2.329074  |
| H | 4.147358  | 1.903049  | 4.645528  |
| H | 3.513645  | 5.639063  | -1.642479 |
| H | 2.940974  | 3.247747  | -1.378035 |
| H | 2.650523  | 7.320523  | -0.018252 |
| H | 1.206149  | 6.582013  | 1.874912  |

|    |           |           |           |
|----|-----------|-----------|-----------|
| H  | 0.628587  | 4.191282  | 2.140496  |
| H  | 4.374792  | 1.612868  | 0.182933  |
| H  | 3.497216  | -0.593898 | 1.509767  |
| H  | 5.161862  | -0.672768 | 0.909334  |
| H  | 2.892768  | -2.322208 | -0.028282 |
| H  | 4.537096  | -2.352168 | -0.656866 |
| H  | 4.119565  | -2.193966 | -3.166936 |
| H  | 2.819950  | -1.147817 | -3.792610 |
| H  | 2.424112  | -2.554106 | -2.780370 |
| H  | 6.427442  | 0.704501  | -1.615150 |
| H  | 5.965958  | -0.551995 | -2.778137 |
| H  | 6.062911  | -0.933998 | -1.050753 |
| H  | 4.762243  | 2.184367  | -2.599221 |
| H  | 3.052490  | 1.721485  | -2.763341 |
| H  | 4.291179  | 0.908080  | -3.734640 |
| H  | 1.515350  | 0.707573  | -4.186698 |
| H  | 0.767536  | 1.962509  | -3.170451 |
| H  | -0.143601 | 1.249191  | -4.514974 |
| H  | -3.293865 | -2.006168 | -0.641457 |
| H  | -2.288057 | -3.475669 | -0.764775 |
| H  | -3.145914 | -2.866311 | -2.198477 |
| H  | -3.020846 | -4.851925 | 3.330301  |
| H  | -0.971033 | -4.617976 | 1.983440  |
| H  | -4.547141 | -2.907391 | 3.657507  |
| H  | -3.969033 | -0.704708 | 2.616080  |
| H  | -1.925071 | -0.460821 | 1.285417  |
| H  | 2.601998  | -6.474176 | 1.584031  |
| H  | 1.781758  | -4.189312 | 2.082029  |
| H  | 2.151619  | -7.505736 | -0.640463 |
| H  | 0.858880  | -6.238310 | -2.350533 |
| H  | 0.007636  | -3.969469 | -1.843603 |
| Cu | -0.988377 | 1.573185  | 0.115351  |

105

Figure 1\_L-Cu-Bpin\_05 / electronic energy: -4678.60699442 a.u. / lowest freq: 13.79 cm<sup>-1</sup>

|    |           |           |           |
|----|-----------|-----------|-----------|
| P  | 0.020853  | -2.542593 | 0.323468  |
| Cu | -0.569564 | 1.622856  | 0.208707  |
| P  | 1.583095  | 1.100309  | 0.712983  |
| B  | -2.463257 | 2.269028  | -0.143186 |
| O  | -2.935228 | 3.138127  | -1.123435 |
| O  | -3.558111 | 1.786106  | 0.582212  |
| C  | -4.334946 | 3.383353  | -0.929878 |
| C  | -4.775874 | 2.140326  | -0.084856 |
| C  | -5.011691 | 3.506254  | -2.287761 |
| C  | -4.464132 | 4.701914  | -0.164717 |
| C  | -5.179941 | 0.943289  | -0.946688 |
| C  | -5.856348 | 2.418639  | 0.950085  |
| H  | -4.412375 | 0.731421  | -1.705245 |
| H  | -6.143599 | 1.102894  | -1.453080 |
| H  | -5.272986 | 0.056847  | -0.301469 |
| H  | -5.529795 | 3.162799  | 1.688224  |
| H  | -6.102153 | 1.492396  | 1.491403  |
| H  | -6.776902 | 2.783403  | 0.468517  |
| H  | -3.991727 | 4.633413  | 0.826499  |
| H  | -5.514747 | 5.000788  | -0.033075 |
| H  | -3.949240 | 5.494702  | -0.727821 |
| H  | -6.103039 | 3.601979  | -2.177636 |
| H  | -4.796373 | 2.639598  | -2.926727 |
| H  | -4.643782 | 4.404619  | -2.806107 |
| C  | 1.007478  | 1.178518  | 3.397000  |
| C  | 1.160946  | 0.897341  | 4.752425  |
| C  | 1.867108  | 0.605869  | 2.449088  |
| C  | 2.160421  | 0.021044  | 5.174480  |
| C  | 2.869163  | -0.270536 | 2.880658  |
| C  | 3.009781  | -0.565437 | 4.236755  |
| C  | 3.028161  | 4.623346  | -0.763943 |
| C  | 2.235786  | 3.515132  | -0.470472 |
| C  | 2.645463  | 2.583823  | 0.492624  |
| C  | 4.233799  | 4.815010  | -0.088892 |
| C  | 4.640884  | 3.899398  | 0.882460  |
| C  | 3.850465  | 2.787622  | 1.174371  |
| C  | 3.878304  | -0.433814 | -0.480867 |
| C  | 2.410063  | -0.048110 | -0.409166 |
| C  | 1.807123  | -0.577730 | -1.493966 |
| C  | 3.910224  | -1.967589 | -0.212984 |
| C  | 3.238003  | -2.547583 | -1.475107 |
| C  | 2.892448  | -1.283812 | -2.320128 |
| C  | 2.573602  | -1.583826 | -3.769709 |
| C  | 4.128701  | -0.364555 | -2.013306 |
| C  | 5.476281  | -0.938133 | -2.461649 |
| C  | 4.031525  | 1.051803  | -2.584280 |
| C  | 0.361719  | -0.652765 | -1.800807 |
| C  | -0.241200 | 0.043415  | -2.820803 |
| C  | -0.556502 | -1.527587 | -1.091416 |
| S  | -1.906254 | -0.399209 | -2.952920 |
| C  | -1.829441 | -1.494843 | -1.620223 |
| C  | 0.324949  | 1.109999  | -3.702816 |
| C  | -3.059962 | -2.261130 | -1.244115 |
| C  | -0.959371 | -1.807947 | 4.220865  |
| C  | -0.385400 | -2.289256 | 3.046591  |
| C  | -1.942471 | -0.817666 | 4.162959  |
| C  | -0.810622 | -1.816985 | 1.794238  |
| C  | -2.343359 | -0.314492 | 2.927383  |
| C  | -1.787324 | -0.816663 | 1.749671  |
| C  | -1.245219 | -6.047467 | -1.387938 |
| C  | -0.620268 | -4.830353 | -1.125243 |
| C  | -2.142265 | -6.588526 | -0.464647 |
| C  | -0.895567 | -4.122440 | 0.054767  |

|   |           |           |           |
|---|-----------|-----------|-----------|
| C | -2.406066 | -5.902188 | 0.719533  |
| C | -1.787810 | -4.677810 | 0.978002  |
| H | 0.204735  | 1.844764  | 3.067326  |
| H | 0.483311  | 1.350331  | 5.479555  |
| H | 2.275627  | -0.208376 | 6.236452  |
| H | 3.551164  | -0.726422 | 2.163139  |
| H | 3.791668  | -1.256009 | 4.560994  |
| H | 2.699185  | 5.342104  | -1.517832 |
| H | 1.286802  | 3.365048  | -0.994712 |
| H | 4.855395  | 5.684573  | -0.315489 |
| H | 5.581636  | 4.050961  | 1.416963  |
| H | 4.176770  | 2.077415  | 1.938404  |
| H | 4.559055  | 0.161445  | 0.143528  |
| H | 3.358288  | -2.229767 | 0.699906  |
| H | 4.942862  | -2.324897 | -0.090480 |
| H | 2.331944  | -3.125062 | -1.242502 |
| H | 3.909725  | -3.208419 | -2.042852 |
| H | 3.420812  | -2.099585 | -4.248137 |
| H | 2.366674  | -0.670626 | -4.346120 |
| H | 1.693728  | -2.240742 | -3.855669 |
| H | 6.297762  | -0.339638 | -2.036560 |
| H | 5.569088  | -0.883670 | -3.557889 |
| H | 5.645513  | -1.982340 | -2.170475 |
| H | 4.888740  | 1.656053  | -2.246718 |
| H | 3.121369  | 1.580457  | -2.276733 |
| H | 4.060287  | 1.030108  | -3.685467 |
| H | 1.393529  | 1.248205  | -3.497865 |
| H | -0.175951 | 2.074097  | -3.518608 |
| H | 0.206112  | 0.872679  | -4.771233 |
| H | -3.965074 | -1.772207 | -1.630168 |
| H | -3.158066 | -2.346143 | -0.154015 |
| H | -3.028548 | -3.283488 | -1.653821 |
| H | -0.622245 | -2.193207 | 5.186064  |
| H | 0.402374  | -3.046646 | 3.102570  |
| H | -2.381875 | -0.427182 | 5.084176  |
| H | -3.091266 | 0.478031  | 2.851884  |
| H | -2.122724 | -0.396871 | 0.799623  |
| H | -1.028925 | -6.577833 | -2.318565 |
| H | 0.080031  | -4.417732 | -1.858416 |
| H | -2.632440 | -7.543591 | -0.667800 |
| H | -3.107451 | -6.315734 | 1.448499  |
| H | -2.021416 | -4.146296 | 1.903262  |

105

Figure 1\_I-Cu-Bpin\_06 / electronic energy: -4678.60363299 a.u. / lowest freq: 17.34 cm-1

|   |           |           |           |
|---|-----------|-----------|-----------|
| B | -2.283125 | 2.392153  | -0.404573 |
| O | -3.423006 | 1.607390  | -0.212615 |
| O | -2.687819 | 3.666696  | -0.796243 |
| C | -4.582524 | 2.307127  | -0.680223 |
| C | -4.105919 | 3.797740  | -0.622095 |
| C | -5.763202 | 1.971142  | 0.219413  |
| C | -4.866549 | 1.833170  | -2.106246 |
| C | -4.336044 | 4.442380  | 0.746447  |
| C | -4.667541 | 4.696228  | -1.714331 |
| H | -3.956041 | 3.801945  | 1.556183  |
| H | -5.401128 | 4.647293  | 0.931394  |
| H | -3.790289 | 5.396666  | 0.789061  |
| H | -4.389258 | 4.342438  | -2.715876 |
| H | -4.271602 | 5.716382  | -1.596975 |
| H | -5.765653 | 4.750056  | -1.653600 |
| H | -4.028172 | 2.067758  | -2.778009 |
| H | -5.782120 | 2.287711  | -2.513508 |
| H | -5.002176 | 0.741307  | -2.105234 |
| H | -6.653005 | 2.557147  | -0.059135 |
| H | -5.536052 | 2.161330  | 1.276798  |
| H | -6.014747 | 0.904468  | 0.117713  |
| P | 1.677728  | 1.073326  | 0.614733  |
| C | 2.082866  | -0.463586 | 2.958599  |
| C | 2.199338  | -0.625470 | 4.339732  |
| C | 1.925123  | 0.809671  | 2.406147  |
| C | 2.145075  | 0.482192  | 5.182372  |
| C | 1.852446  | 1.919742  | 3.261787  |
| C | 1.965410  | 1.756370  | 4.639463  |
| C | 3.366012  | 4.287676  | -1.261223 |
| C | 2.482983  | 3.301947  | -0.821590 |
| C | 2.854809  | 2.421205  | 0.201568  |
| C | 4.623946  | 4.408145  | -0.671914 |
| C | 4.995382  | 3.544598  | 0.360463  |
| C | 4.116131  | 2.554522  | 0.795951  |
| C | 3.859320  | -0.810861 | -0.243459 |
| C | 2.425166  | -0.305418 | -0.284873 |
| C | 1.816715  | -0.916415 | -1.323575 |
| C | 3.780737  | -2.300209 | 0.194283  |
| C | 3.084775  | -2.973918 | -1.006961 |
| C | 2.867522  | -1.799591 | -2.011087 |
| C | 2.569984  | -2.247705 | -3.426770 |
| C | 4.164793  | -0.944905 | -1.764507 |
| C | 5.471946  | -1.673784 | -2.091717 |
| C | 4.208420  | 0.396515  | -2.498841 |
| C | 0.384758  | -0.868935 | -1.698442 |
| C | -0.091950 | -0.191877 | -2.795162 |
| C | -0.665922 | -1.545950 | -0.955647 |
| S | -1.803375 | -0.390062 | -2.936866 |
| C | -1.911737 | -1.360066 | -1.514935 |
| C | 0.635938  | 0.689809  | -3.759639 |
| C | -3.251256 | -1.865100 | -1.080999 |
| P | -0.287642 | -2.578611 | 0.511265  |
| C | -2.228295 | 0.168588  | 2.942598  |

|    |           |           |           |
|----|-----------|-----------|-----------|
| C  | -1.787530 | -0.511849 | 1.807103  |
| C  | -1.982653 | -0.349325 | 4.212510  |
| C  | -1.071668 | -1.707504 | 1.927132  |
| C  | -1.289597 | -1.554468 | 4.343782  |
| C  | -0.823737 | -2.218137 | 3.211252  |
| C  | -3.035514 | -5.689349 | 0.860952  |
| C  | -2.307997 | -4.529530 | 1.135085  |
| C  | -2.833141 | -6.384061 | -0.330350 |
| C  | -1.365811 | -4.048428 | 0.219558  |
| C  | -1.890295 | -5.915419 | -1.247295 |
| C  | -1.157837 | -4.763779 | -0.969836 |
| H  | 2.099078  | -1.340752 | 2.310037  |
| H  | 2.325212  | -1.627279 | 4.756819  |
| H  | 2.237243  | 0.354358  | 6.263373  |
| H  | 1.711355  | 2.921953  | 2.847130  |
| H  | 1.912198  | 2.629124  | 5.294482  |
| H  | 3.065749  | 4.968032  | -2.061312 |
| H  | 1.492110  | 3.209261  | -1.276955 |
| H  | 5.316630  | 5.181404  | -1.012494 |
| H  | 5.976815  | 3.643032  | 0.830256  |
| H  | 4.415169  | 1.884824  | 1.606218  |
| H  | 4.562465  | -0.199969 | 0.338159  |
| H  | 3.218904  | -2.425285 | 1.127997  |
| H  | 4.787634  | -2.706186 | 0.367139  |
| H  | 2.127702  | -3.439997 | -0.734986 |
| H  | 3.708547  | -3.755146 | -1.466090 |
| H  | 3.372983  | -2.903464 | -3.797739 |
| H  | 2.481553  | -1.399753 | -4.121370 |
| H  | 1.628364  | -2.817037 | -3.473758 |
| H  | 6.328640  | -1.103445 | -1.698382 |
| H  | 5.603814  | -1.745828 | -3.182897 |
| H  | 5.539889  | -2.690980 | -1.686207 |
| H  | 5.118676  | 0.950171  | -2.218703 |
| H  | 3.353998  | 1.044150  | -2.270369 |
| H  | 4.242678  | 0.243483  | -3.589333 |
| H  | 1.705273  | 0.721220  | -3.520326 |
| H  | 0.253496  | 1.722100  | -3.714438 |
| H  | 0.527289  | 0.340546  | -4.798218 |
| H  | -3.272723 | -2.041461 | 0.001042  |
| H  | -3.503775 | -2.814723 | -1.580415 |
| H  | -4.034687 | -1.131106 | -1.314616 |
| H  | -2.766202 | 1.111264  | 2.817655  |
| H  | -2.007503 | -0.085082 | 0.826317  |
| H  | -2.327127 | 0.184197  | 5.101572  |
| H  | -1.089413 | -1.967727 | 5.335214  |
| H  | -0.245135 | -3.139675 | 3.328477  |
| H  | -3.772458 | -6.045992 | 1.584799  |
| H  | -2.494772 | -3.990726 | 2.066878  |
| H  | -3.406269 | -7.289210 | -0.544790 |
| H  | -1.722156 | -6.450807 | -2.184926 |
| H  | -0.423226 | -4.407692 | -1.698456 |
| Cu | -0.425176 | 1.667715  | -0.014443 |

105

Figure 1\_L-Cu-Bpin\_07 / electronic energy: -4678.60209838 a.u. / lowest freq: 15.70 cm<sup>-1</sup>

|    |           |           |           |
|----|-----------|-----------|-----------|
| P  | -0.343282 | -2.533097 | 0.593076  |
| Cu | -0.450680 | 1.628010  | 0.109411  |
| P  | 1.758239  | 1.218384  | 0.454426  |
| B  | -2.332775 | 2.314180  | -0.267966 |
| O  | -2.703772 | 3.583578  | -0.704869 |
| O  | -3.493982 | 1.545586  | -0.124592 |
| C  | -4.129058 | 3.729474  | -0.634340 |
| C  | -4.615305 | 2.241965  | -0.684580 |
| C  | -4.602107 | 4.596824  | -1.791800 |
| C  | -4.449128 | 4.417477  | 0.694154  |
| C  | -4.810694 | 1.728858  | -2.112256 |
| C  | -5.855174 | 1.940891  | 0.145102  |
| H  | -3.925433 | 1.931889  | -2.731992 |
| H  | -5.689526 | 2.183982  | -2.593045 |
| H  | -4.964181 | 0.639628  | -2.088532 |
| H  | -5.696859 | 2.160052  | 1.209318  |
| H  | -6.111827 | 0.874282  | 0.056187  |
| H  | -6.717979 | 2.526414  | -0.208617 |
| H  | -4.131014 | 3.801129  | 1.548262  |
| H  | -5.522778 | 4.633488  | 0.799088  |
| H  | -3.900659 | 5.369789  | 0.744984  |
| H  | -5.701562 | 4.648125  | -1.823170 |
| H  | -4.241442 | 4.216149  | -2.756458 |
| H  | -4.217981 | 5.621074  | -1.671568 |
| C  | 3.618925  | 1.095956  | 2.597381  |
| C  | 3.989417  | 0.814992  | 3.910105  |
| C  | 2.291702  | 0.916590  | 2.184753  |
| C  | 3.036839  | 0.359434  | 4.824427  |
| C  | 1.339263  | 0.475821  | 3.109357  |
| C  | 1.712054  | 0.194405  | 4.424451  |
| C  | 2.812054  | 5.155699  | 0.316366  |
| C  | 2.187363  | 3.941134  | 0.585231  |
| C  | 2.677130  | 2.748951  | 0.030403  |
| C  | 3.925919  | 5.197857  | -0.525035 |
| C  | 4.409166  | 4.020416  | -1.091790 |
| C  | 3.789160  | 2.800118  | -0.814751 |
| C  | 3.941322  | -0.673546 | -0.368068 |
| C  | 2.524873  | -0.127835 | -0.474491 |
| C  | 1.839435  | -0.963760 | -1.281617 |
| C  | 3.803909  | -1.972624 | 0.478015  |
| C  | 3.063468  | -2.925545 | -0.485924 |
| C  | 2.816980  | -2.049944 | -1.754058 |
| C  | 2.407863  | -2.830221 | -2.985443 |

|   |           |           |           |
|---|-----------|-----------|-----------|
| C | 4.158467  | -1.235599 | -1.803502 |
| C | 5.422480  | -2.088952 | -1.953381 |
| C | 4.212689  | -0.178893 | -2.907878 |
| C | 0.402281  | -0.915166 | -1.645519 |
| C | -0.028509 | -0.247678 | -2.766051 |
| C | -0.680737 | -1.553544 | -0.919507 |
| S | -1.734913 | -0.419317 | -2.958964 |
| C | -1.906548 | -1.362147 | -1.524572 |
| C | 0.764883  | 0.581289  | -3.728002 |
| C | -3.279165 | -1.780675 | -1.102602 |
| C | -2.673696 | 0.014607  | 2.900431  |
| C | -2.101337 | -0.611045 | 1.791986  |
| C | -2.433166 | -0.469255 | 4.184789  |
| C | -1.263968 | -1.718300 | 1.955659  |
| C | -1.602000 | -1.578409 | 4.359709  |
| C | -1.008623 | -2.186068 | 3.255483  |
| C | -1.704577 | -5.968805 | -1.202334 |
| C | -1.057034 | -4.767065 | -0.924737 |
| C | -2.606306 | -6.509729 | -0.283949 |
| C | -1.308278 | -4.075978 | 0.270851  |
| C | -2.852757 | -5.837397 | 0.911596  |
| C | -2.208832 | -4.630174 | 1.188225  |
| H | 4.367174  | 1.463582  | 1.890672  |
| H | 5.026712  | 0.955829  | 4.222838  |
| H | 3.328124  | 0.141825  | 5.854796  |
| H | 0.297930  | 0.355621  | 2.801686  |
| H | 0.959218  | -0.150603 | 5.136659  |
| H | 2.420518  | 6.075345  | 0.757175  |
| H | 1.302967  | 3.917053  | 1.229566  |
| H | 4.413422  | 6.151408  | -0.741033 |
| H | 5.275991  | 4.045784  | -1.756482 |
| H | 4.180193  | 1.889594  | -1.266688 |
| H | 4.702469  | 0.027755  | -0.000839 |
| H | 3.237811  | -1.781647 | 1.401033  |
| H | 4.789225  | -2.361905 | 0.772673  |
| H | 2.118953  | -3.297409 | -0.071035 |
| H | 3.671954  | -3.801836 | -0.754220 |
| H | 3.184124  | -3.561310 | -3.259324 |
| H | 2.238168  | -2.171402 | -3.850673 |
| H | 1.474449  | -3.386534 | -2.806039 |
| H | 6.315159  | -1.455731 | -1.827871 |
| H | 5.473697  | -2.524464 | -2.963897 |
| H | 5.504847  | -2.913839 | -1.235360 |
| H | 5.154603  | 0.389461  | -2.846525 |
| H | 3.383518  | 0.535709  | -2.868761 |
| H | 4.194798  | -0.662118 | -3.897871 |
| H | 1.568040  | -0.004110 | -4.199159 |
| H | 1.229224  | 1.435432  | -3.210321 |
| H | 0.130353  | 0.985087  | -4.529228 |
| H | -3.839534 | -0.900551 | -0.750344 |
| H | -3.239386 | -2.510920 | -0.286482 |
| H | -3.835651 | -2.233399 | -1.937526 |
| H | -3.308592 | 0.888865  | 2.740596  |
| H | -2.301532 | -0.195648 | 0.805002  |
| H | -2.885027 | 0.018848  | 5.051652  |
| H | -1.399268 | -1.960448 | 5.363156  |
| H | -0.325579 | -3.027365 | 3.406813  |
| H | -1.503375 | -6.486296 | -2.143503 |
| H | -0.355624 | -4.355707 | -1.656621 |
| H | -3.114627 | -7.452225 | -0.500581 |
| H | -3.559491 | -6.248283 | 1.636869  |
| H | -2.428676 | -4.112622 | 2.124520  |

105

Figure 1\_L-Cu-Bpin\_08 / electronic energy: -4678.60272089 a.u. / lowest freq: 15.21 cm-1

|   |           |           |           |
|---|-----------|-----------|-----------|
| B | -2.559138 | 2.042317  | -0.338181 |
| O | -3.459678 | 1.095660  | -0.825104 |
| O | -3.250379 | 3.236709  | -0.129886 |
| C | -4.706892 | 1.716421  | -1.144806 |
| C | -4.660693 | 3.014211  | -0.268727 |
| C | -5.842655 | 0.759278  | -0.808738 |
| C | -4.700376 | 2.003591  | -2.647602 |
| C | -5.228281 | 2.800177  | 1.135685  |
| C | -5.302677 | 4.238816  | -0.904776 |
| H | -4.792066 | 1.906119  | 1.604492  |
| H | -6.323011 | 2.690322  | 1.125458  |
| H | -4.974172 | 3.668722  | 1.761753  |
| H | -4.808506 | 4.512517  | -1.846347 |
| H | -5.224680 | 5.098201  | -0.221588 |
| H | -6.370750 | 4.062860  | -1.106393 |
| H | -3.889432 | 2.696089  | -2.917566 |
| H | -5.655181 | 2.429166  | -2.991294 |
| H | -4.530304 | 1.060797  | -3.188609 |
| H | -6.821110 | 1.252488  | -0.919000 |
| H | -5.754863 | 0.373877  | 0.216006  |
| H | -5.822069 | -0.101677 | -1.494105 |
| P | 1.595967  | 1.466357  | 0.654974  |
| C | 2.247763  | 2.621696  | 3.169522  |
| C | 2.360102  | 2.587018  | 4.560303  |
| C | 1.889924  | 1.468402  | 2.461604  |
| C | 2.109261  | 1.406075  | 5.257403  |
| C | 1.617521  | 0.290058  | 3.171608  |
| C | 1.733518  | 0.257508  | 4.559272  |
| C | 2.617106  | 4.665730  | -1.663227 |
| C | 1.921581  | 3.649297  | -1.007673 |
| C | 2.551788  | 2.874653  | -0.025888 |
| C | 3.947579  | 4.920276  | -1.335901 |
| C | 4.579690  | 4.162119  | -0.347835 |

|    |           |           |           |
|----|-----------|-----------|-----------|
| C  | 3.888004  | 3.143178  | 0.303373  |
| C  | 3.940401  | -0.391063 | 0.350980  |
| C  | 2.526652  | 0.056045  | 0.016219  |
| C  | 2.071698  | -0.750108 | -0.961862 |
| C  | 3.788158  | -1.766634 | 1.058552  |
| C  | 3.274401  | -2.677335 | -0.077131 |
| C  | 3.203707  | -1.724780 | -1.311417 |
| C  | 3.098267  | -2.449406 | -2.637127 |
| C  | 4.454043  | -0.805731 | -1.059027 |
| C  | 5.795374  | -1.544841 | -1.056029 |
| C  | 4.593057  | 0.368837  | -2.030346 |
| C  | 0.720724  | -0.786999 | -1.562853 |
| C  | 0.430484  | -0.185156 | -2.763122 |
| C  | -0.418551 | -1.472257 | -0.982307 |
| S  | -1.214471 | -0.475073 | -3.199273 |
| C  | -1.542260 | -1.392595 | -1.779103 |
| C  | 1.301753  | 0.687922  | -3.612068 |
| C  | -2.914813 | -1.942198 | -1.563831 |
| P  | -0.283302 | -2.275760 | 0.658330  |
| C  | -3.073012 | -0.171501 | 2.778384  |
| C  | -1.929518 | -0.586933 | 2.099092  |
| C  | -4.164736 | -1.030930 | 2.896347  |
| C  | -1.864698 | -1.855771 | 1.508012  |
| C  | -4.102094 | -2.306643 | 2.333127  |
| C  | -2.960912 | -2.716213 | 1.644633  |
| C  | -0.471046 | -6.332846 | 1.182539  |
| C  | -0.413996 | -4.955718 | 1.380995  |
| C  | -0.543503 | -6.851014 | -0.112205 |
| C  | -0.453965 | -4.070096 | 0.291704  |
| C  | -0.560165 | -5.981967 | -1.201671 |
| C  | -0.517583 | -4.600658 | -1.002129 |
| H  | 2.439744  | 3.557630  | 2.639974  |
| H  | 2.643932  | 3.493278  | 5.100572  |
| H  | 2.201278  | 1.381413  | 6.345758  |
| H  | 1.304541  | -0.609722 | 2.633398  |
| H  | 1.524258  | -0.670282 | 5.096702  |
| H  | 2.114314  | 5.260324  | -2.429325 |
| H  | 0.875010  | 3.448212  | -1.256939 |
| H  | 4.494468  | 5.715946  | -1.847474 |
| H  | 5.621294  | 4.363108  | -0.086809 |
| H  | 4.393685  | 2.557363  | 1.074252  |
| H  | 4.557086  | 0.332966  | 0.899521  |
| H  | 3.090666  | -1.709493 | 1.903357  |
| H  | 4.754614  | -2.109389 | 1.455822  |
| H  | 2.290969  | -3.117793 | 0.136043  |
| H  | 3.959503  | -3.513161 | -0.283298 |
| H  | 3.974611  | -3.097915 | -2.792006 |
| H  | 3.036390  | -1.754789 | -3.487745 |
| H  | 2.203185  | -3.090790 | -2.664452 |
| H  | 6.581516  | -0.891258 | -0.644991 |
| H  | 6.090915  | -1.799533 | -2.086156 |
| H  | 5.802300  | -2.475749 | -0.474980 |
| H  | 5.473435  | 0.975855  | -1.765429 |
| H  | 3.722230  | 1.036143  | -2.033906 |
| H  | 4.749074  | 0.004032  | -3.058539 |
| H  | 2.302610  | 0.253164  | -3.736979 |
| H  | 1.428261  | 1.681011  | -3.151029 |
| H  | 0.871699  | 0.837178  | -4.612700 |
| H  | -3.462985 | -1.302027 | -0.857448 |
| H  | -2.872208 | -2.964740 | -1.164818 |
| H  | -3.482231 | -1.966823 | -2.505478 |
| H  | -3.104565 | 0.826813  | 3.220656  |
| H  | -1.076115 | 0.093850  | 2.021696  |
| H  | -5.061841 | -0.709998 | 3.431388  |
| H  | -4.950633 | -2.989035 | 2.424669  |
| H  | -2.933807 | -3.713319 | 1.199249  |
| H  | -0.449715 | -7.006930 | 2.042278  |
| H  | -0.341667 | -4.560783 | 2.398988  |
| H  | -0.582160 | -7.931325 | -0.270319 |
| H  | -0.612101 | -6.379377 | -2.218212 |
| H  | -0.537849 | -3.929741 | -1.864283 |
| Cu | -0.606574 | 1.642979  | 0.079796  |

105

Figure 1\_L-Cu-Bpin\_09 / electronic energy: -4678.60328369 a.u. / lowest freq: 16.25 cm<sup>-1</sup>

|    |           |           |           |
|----|-----------|-----------|-----------|
| P  | 0.139809  | 2.292587  | 0.637600  |
| Cu | 0.709666  | -1.621976 | 0.115754  |
| P  | -1.492492 | -1.512605 | 0.713110  |
| B  | 2.672513  | -1.948524 | -0.313643 |
| O  | 3.331575  | -3.172064 | -0.434782 |
| O  | 3.609556  | -0.928661 | -0.483539 |
| C  | 4.749918  | -2.959676 | -0.461994 |
| C  | 4.851436  | -1.472044 | -0.940749 |
| C  | 5.392676  | -3.977375 | -1.393154 |
| C  | 5.267889  | -3.160545 | 0.963154  |
| C  | 4.878391  | -1.332927 | -2.463779 |
| C  | 5.998380  | -0.679329 | -0.329157 |
| H  | 4.059094  | -1.899725 | -2.929928 |
| H  | 5.831760  | -1.677398 | -2.891958 |
| H  | 4.746874  | -0.273052 | -2.727370 |
| H  | 5.898694  | -0.602497 | 0.761534  |
| H  | 6.005685  | 0.343279  | -0.736209 |
| H  | 6.969005  | -1.143403 | -0.563534 |
| H  | 4.827001  | -2.425123 | 1.652453  |
| H  | 6.363656  | -3.078591 | 1.018970  |
| H  | 4.979962  | -4.163524 | 1.312116  |
| H  | 6.471325  | -3.785141 | -1.503313 |
| H  | 4.931554  | -3.962811 | -2.389462 |

|   |           |           |           |
|---|-----------|-----------|-----------|
| H | 5.269772  | -4.990073 | -0.979953 |
| C | -2.059293 | -2.614798 | 3.267757  |
| C | -2.176725 | -2.537733 | 4.656110  |
| C | -1.787504 | -1.464348 | 2.517539  |
| C | -2.014478 | -1.316460 | 5.308793  |
| C | -1.601792 | -0.244108 | 3.182951  |
| C | -1.721035 | -0.170094 | 4.568904  |
| C | -2.462770 | -4.703605 | -1.628205 |
| C | -1.787438 | -3.669838 | -0.979497 |
| C | -2.398845 | -2.969108 | 0.067698  |
| C | -3.752182 | -5.050635 | -1.228133 |
| C | -4.364191 | -4.365078 | -0.176673 |
| C | -3.694351 | -3.326253 | 0.466483  |
| C | -3.925647 | 0.202776  | 0.319417  |
| C | -2.486255 | -0.176431 | 0.012152  |
| C | -2.074587 | 0.597169  | -1.010636 |
| C | -3.855449 | 1.626850  | 0.940636  |
| C | -3.400047 | 2.495310  | -0.252928 |
| C | -3.265537 | 1.471897  | -1.423175 |
| C | -3.197252 | 2.105552  | -2.796895 |
| C | -4.460512 | 0.498201  | -1.111434 |
| C | -5.841684 | 1.159759  | -1.152112 |
| C | -4.536873 | -0.744857 | -2.001134 |
| C | -0.715291 | 0.706152  | -1.587398 |
| C | -0.358943 | 0.125730  | -2.779799 |
| C | 0.368396  | 1.460731  | -0.978759 |
| S | 1.280434  | 0.509270  | -3.174730 |
| C | 1.514803  | 1.444026  | -1.743790 |
| C | -1.166194 | -0.754241 | -3.680383 |
| C | 2.851933  | 2.060294  | -1.488510 |
| C | 3.871247  | 2.670533  | 2.457438  |
| C | 2.719536  | 2.979621  | 1.734786  |
| C | 4.052118  | 1.389243  | 2.980745  |
| C | 1.728823  | 2.011453  | 1.528958  |
| C | 3.067103  | 0.421342  | 2.789104  |
| C | 1.909382  | 0.737266  | 2.082081  |
| C | 0.217724  | 5.951129  | -1.333881 |
| C | 0.283197  | 4.578686  | -1.086909 |
| C | 0.054395  | 6.848587  | -0.280243 |
| C | 0.181544  | 4.083922  | 0.218711  |
| C | -0.054973 | 6.366157  | 1.025659  |
| C | -0.004382 | 4.996015  | 1.270528  |
| H | -2.181181 | -3.580545 | 2.772050  |
| H | -2.395443 | -3.442033 | 5.228950  |
| H | -2.110542 | -1.258120 | 6.395517  |
| H | -1.351490 | 0.655118  | 2.611831  |
| H | -1.578833 | 0.788806  | 5.072510  |
| H | -1.976615 | -5.239546 | -2.446596 |
| H | -0.773450 | -3.395679 | -1.287312 |
| H | -4.282126 | -5.861659 | -1.733417 |
| H | -5.373717 | -4.637315 | 0.140113  |
| H | -4.186323 | -2.792349 | 1.282996  |
| H | -4.497949 | -0.524417 | 0.911065  |
| H | -3.152475 | 1.664585  | 1.782270  |
| H | -4.839819 | 1.933960  | 1.322391  |
| H | -2.446969 | 3.010167  | -0.070350 |
| H | -4.136319 | 3.271054  | -0.510855 |
| H | -4.115300 | 2.677367  | -3.004086 |
| H | -3.077839 | 1.354619  | -3.592253 |
| H | -2.349135 | 2.804563  | -2.866496 |
| H | -6.593332 | 0.483474  | -0.714397 |
| H | -6.142593 | 1.348308  | -2.194840 |
| H | -5.905217 | 2.114248  | -0.615165 |
| H | -5.398164 | -1.365368 | -1.707213 |
| H | -3.645656 | -1.381453 | -1.938883 |
| H | -4.686583 | -0.462876 | -3.055635 |
| H | -2.164994 | -0.912329 | -3.257603 |
| H | -0.695005 | -1.742008 | -3.804603 |
| H | -1.285557 | -0.316005 | -4.683853 |
| H | 3.427034  | 1.415144  | -0.806531 |
| H | 2.747988  | 3.056556  | -1.039119 |
| H | 3.422953  | 2.167073  | -2.422261 |
| H | 4.637738  | 3.435562  | 2.604327  |
| H | 2.602319  | 3.982274  | 1.316857  |
| H | 4.959610  | 1.147958  | 3.539661  |
| H | 3.193929  | -0.585230 | 3.194515  |
| H | 1.140181  | -0.029970 | 1.946771  |
| H | 0.299516  | 6.319379  | -2.359470 |
| H | 0.415577  | 3.886105  | -1.921253 |
| H | 0.005211  | 7.922538  | -0.474725 |
| H | -0.191124 | 7.061975  | 1.857057  |
| H | -0.109279 | 4.628267  | 2.295961  |

121

Figure 1\_pcl\_major01\_01 / electronic energy: -4987.95820018 a.u. / lowest freq: 20.32 cm-1

|   |          |           |          |
|---|----------|-----------|----------|
| P | 0.926344 | -0.829104 | 0.735849 |
| C | 0.677302 | 1.516633  | 2.221345 |
| C | 0.751347 | 2.314653  | 3.361450 |
| C | 1.197844 | 0.217931  | 2.227107 |
| C | 1.370600 | 1.830921  | 4.513805 |
| C | 1.826476 | -0.257754 | 3.383497 |
| C | 1.916322 | 0.546804  | 4.518990 |
| C | 3.130335 | -4.322361 | 0.818039 |
| C | 2.059892 | -3.427322 | 0.803697 |
| C | 2.288695 | -2.049899 | 0.842966 |
| C | 4.439043 | -3.847187 | 0.872411 |
| C | 4.674847 | -2.471248 | 0.895219 |
| C | 3.609595 | -1.574735 | 0.870173 |



|   |           |           |           |
|---|-----------|-----------|-----------|
| C | -0.814968 | -2.249149 | 2.666999  |
| C | -0.571130 | -1.726868 | 1.255498  |
| C | -1.744110 | -1.818554 | 0.595056  |
| C | -1.665739 | -1.146105 | 3.360111  |
| C | -3.008477 | -1.245707 | 2.607146  |
| C | -2.778333 | -2.398670 | 1.577280  |
| C | -4.066261 | -2.940356 | 0.992423  |
| C | -1.873667 | -3.362044 | 2.418066  |
| C | -2.524952 | -3.904233 | 3.695535  |
| C | -1.357943 | -4.575821 | 1.645339  |
| C | -2.083165 | -1.400288 | -0.786362 |
| C | -2.153871 | -2.313568 | -1.811956 |
| C | -2.442210 | -0.057968 | -1.200186 |
| S | -2.650367 | -1.542511 | -3.274309 |
| C | -2.770795 | 0.013899  | -2.538013 |
| C | -1.842323 | -3.778728 | -1.796312 |
| C | -3.216323 | 1.175112  | -3.373073 |
| P | -2.500122 | 1.296233  | 0.033964  |
| C | -2.648152 | 4.941752  | -1.973320 |
| C | -3.049909 | 3.799408  | -1.281427 |
| C | -1.307761 | 5.123767  | -2.318150 |
| C | -2.114026 | 2.820028  | -0.925598 |
| C | -0.366089 | 4.162489  | -1.951360 |
| C | -0.767831 | 3.026898  | -1.251035 |
| C | -6.022725 | 2.494223  | 1.740113  |
| C | -4.682241 | 2.334780  | 1.396735  |
| C | -7.007652 | 1.766446  | 1.069488  |
| C | -4.304599 | 1.464679  | 0.361780  |
| C | -6.641701 | 0.884863  | 0.053794  |
| C | -5.299369 | 0.736174  | -0.300480 |
| H | 0.210178  | 1.909989  | 1.318485  |
| H | 0.329167  | 3.321832  | 3.342912  |
| H | 1.435202  | 2.457123  | 5.406900  |
| H | 2.249227  | -1.264795 | 3.405191  |
| H | 2.410821  | 0.164233  | 5.414917  |
| H | 2.935898  | -5.396920 | 0.785363  |
| H | 1.039921  | -3.809582 | 0.764940  |
| H | 5.276359  | -4.549002 | 0.886384  |
| H | 5.698601  | -2.090056 | 0.921588  |
| H | 3.806211  | -0.498550 | 0.853395  |
| H | 0.085483  | -2.550035 | 3.220157  |
| H | -1.200061 | -0.158057 | 3.261984  |
| H | -1.776460 | -1.349525 | 4.434728  |
| H | -3.287733 | -0.312841 | 2.102730  |
| H | -3.842977 | -1.508489 | 3.274103  |
| H | -4.719383 | -3.322361 | 1.792302  |
| H | -3.894442 | -3.758551 | 0.278634  |
| H | -4.620991 | -2.147246 | 0.466885  |
| H | -1.773677 | -4.442211 | 4.295682  |
| H | -3.315640 | -4.627644 | 3.441265  |
| H | -2.975162 | -3.141337 | 4.342071  |
| H | -0.614851 | -5.125026 | 2.245000  |
| H | -0.896113 | -4.313133 | 0.688760  |
| H | -2.182642 | -5.274051 | 1.431312  |
| H | -0.812272 | -3.953986 | -1.454354 |
| H | -1.944222 | -4.223616 | -2.796233 |
| H | -2.515721 | -4.327332 | -1.122072 |
| H | -2.402613 | 1.901842  | -3.518257 |
| H | -4.052849 | 1.704935  | -2.895584 |
| H | -3.551123 | 0.841761  | -4.365685 |
| H | -3.391084 | 5.693675  | -2.250234 |
| H | -4.105985 | 3.667878  | -1.034595 |
| H | -0.998098 | 6.020007  | -2.861244 |
| H | 0.692931  | 4.294554  | -2.183502 |
| H | -0.005031 | 2.300380  | -0.952844 |
| H | -6.299613 | 3.182502  | 2.542189  |
| H | -3.915845 | 2.895792  | 1.940496  |
| H | -8.059020 | 1.884292  | 1.342185  |
| H | -7.405834 | 0.307591  | -0.472433 |
| H | -5.028493 | 0.042477  | -1.099687 |
| H | 3.853348  | -5.273228 | -2.867955 |
| H | 4.984522  | -3.113144 | -2.339501 |
| C | 3.293006  | -4.335782 | -2.896968 |
| C | 3.924207  | -3.126384 | -2.603116 |
| H | 1.428109  | -5.271304 | -3.464673 |
| C | 1.936930  | -4.333702 | -3.225965 |
| H | 6.569500  | 2.212888  | 0.543010  |
| C | 3.211269  | -1.930480 | -2.628631 |
| H | 5.010684  | 1.424814  | 2.246803  |
| H | 3.723722  | -0.999439 | -2.374010 |
| C | 1.224496  | -3.137192 | -3.254001 |
| C | 1.841238  | -1.913469 | -2.949286 |
| C | 5.929895  | 3.062916  | 0.260472  |
| C | 4.420157  | 2.343684  | 2.112570  |
| H | 6.040917  | 3.221784  | -0.820335 |
| O | 4.001736  | 1.671209  | -0.138162 |
| H | 0.167451  | -3.140896 | -3.526584 |
| H | 4.828908  | 3.112365  | 2.785297  |
| H | 6.302906  | 3.955837  | 0.785490  |
| C | 4.486861  | 2.770981  | 0.645675  |
| C | 1.047333  | -0.668112 | -2.971210 |
| B | 2.655638  | 1.867312  | -0.447585 |
| H | 2.650708  | 0.721185  | -3.438697 |
| C | 1.598053  | 0.591216  | -3.172412 |
| C | 3.466173  | 3.908585  | 0.286723  |
| H | 4.150358  | 4.105820  | -1.777853 |
| O | 2.303365  | 3.165791  | -0.104092 |

|    |           |           |           |
|----|-----------|-----------|-----------|
| H  | 4.759205  | 5.385504  | -0.689059 |
| H  | 3.989365  | 5.351744  | 1.826722  |
| C  | 3.894911  | 4.744782  | -0.919310 |
| H  | 0.943264  | 1.431083  | -3.424871 |
| C  | 3.101480  | 4.823152  | 1.446839  |
| H  | 3.059747  | 5.395391  | -1.219370 |
| H  | 2.374226  | 5.577293  | 1.110236  |
| Cu | 1.438783  | 0.375232  | -1.154580 |
| H  | -0.034315 | -0.794147 | -3.066252 |
| H  | 3.386657  | 2.127770  | 2.415952  |
| H  | 2.645559  | 4.262569  | 2.273304  |

121

Figure 1\_pcl\_major01\_02 / electronic energy: -4987.95729960 a.u. / lowest freq: 12.21 cm-1

|   |           |           |           |
|---|-----------|-----------|-----------|
| B | 2.149764  | 1.721002  | -0.563761 |
| O | 1.984447  | 3.078978  | -0.289313 |
| O | 3.484503  | 1.389779  | -0.334324 |
| C | 3.257161  | 3.690170  | -0.031134 |
| C | 4.134216  | 2.455077  | 0.367336  |
| C | 3.093016  | 4.736831  | 1.060491  |
| C | 3.713930  | 4.354185  | -1.330326 |
| C | 4.057968  | 2.121988  | 1.858914  |
| C | 5.589367  | 2.531832  | -0.069925 |
| H | 3.014178  | 2.085230  | 2.201743  |
| H | 4.605946  | 2.850845  | 2.474493  |
| H | 4.499755  | 1.127746  | 2.023977  |
| H | 5.684095  | 2.605903  | -1.161414 |
| H | 6.121035  | 1.623879  | 0.252840  |
| H | 6.092364  | 3.398994  | 0.385625  |
| H | 3.841480  | 3.611395  | -2.131991 |
| H | 4.661436  | 4.898618  | -1.203066 |
| H | 2.946292  | 5.071986  | -1.656001 |
| H | 4.067235  | 5.160607  | 1.349761  |
| H | 2.614718  | 4.315006  | 1.954400  |
| H | 2.459961  | 5.560490  | 0.696947  |
| C | 1.819761  | -3.137137 | -2.891439 |
| C | 2.833317  | -4.083027 | -2.767977 |
| C | 2.109826  | -1.767876 | -3.024028 |
| C | 4.172221  | -3.687983 | -2.790440 |
| C | 3.463905  | -1.387712 | -3.055254 |
| C | 4.478882  | -2.335664 | -2.943328 |
| C | 1.008716  | -0.788697 | -3.111281 |
| C | 1.189250  | 0.577554  | -3.219197 |
| H | 5.522314  | -2.010807 | -2.967181 |
| H | 3.732990  | -0.334275 | -3.150880 |
| H | 4.968698  | -4.429371 | -2.693245 |
| H | 2.575758  | -5.138733 | -2.651935 |
| H | 0.776911  | -3.462178 | -2.873348 |
| P | 0.681152  | -1.241327 | 0.549731  |
| C | 3.397153  | -1.754271 | 0.451001  |
| C | 4.635004  | -2.200591 | 0.913793  |
| C | 2.267625  | -1.809272 | 1.272666  |
| C | 4.759940  | -2.690033 | 2.212367  |
| C | 2.403853  | -2.294740 | 2.581480  |
| C | 3.641719  | -2.730832 | 3.048419  |
| C | -1.288691 | -4.844270 | 1.202616  |
| C | -0.457486 | -3.741142 | 1.387167  |
| C | -0.312725 | -2.786265 | 0.372898  |
| C | -1.992052 | -5.003968 | 0.006934  |
| C | -1.850041 | -4.061333 | -1.009431 |
| C | -1.008920 | -2.965298 | -0.823538 |
| C | 0.526753  | 0.446119  | 2.975371  |
| C | -0.159973 | -0.412635 | 1.925524  |
| C | -1.489995 | -0.271228 | 2.100198  |
| C | 0.247634  | 1.915487  | 2.551913  |
| C | -1.266862 | 2.056210  | 2.804622  |
| C | -1.686605 | 0.648085  | 3.325127  |
| C | -3.037998 | 0.646324  | 4.009494  |
| C | -0.432496 | 0.259431  | 4.183120  |
| C | -0.148239 | 1.197228  | 5.361043  |
| C | -0.457337 | -1.163175 | 4.747580  |
| C | -2.617282 | -0.730660 | 1.250034  |
| C | -3.536889 | -1.648584 | 1.694187  |
| C | -2.959260 | -0.183543 | -0.060382 |
| S | -4.846723 | -1.799438 | 0.578109  |
| C | -4.182319 | -0.631251 | -0.513641 |
| C | -3.517770 | -2.494913 | 2.927235  |
| C | -5.016747 | -0.256275 | -1.702398 |
| P | -1.747176 | 0.852925  | -0.979669 |
| C | -2.650717 | -0.540023 | -4.753604 |
| C | -2.405083 | -0.464287 | -3.385448 |
| C | -2.748924 | 0.625423  | -5.515149 |
| C | -2.264940 | 0.776117  | -2.745812 |
| C | -2.603996 | 1.863471  | -4.892894 |
| C | -2.363483 | 1.939413  | -3.520032 |
| C | -1.496471 | 4.846904  | -0.092979 |
| C | -1.196625 | 3.537968  | -0.473390 |
| C | -2.800727 | 5.196993  | 0.253012  |
| C | -2.205951 | 2.569332  | -0.514220 |
| C | -3.811397 | 4.234275  | 0.213139  |
| C | -3.516022 | 2.927501  | -0.168766 |
| H | 3.310444  | -1.339598 | -0.553057 |
| H | 5.504565  | -2.155298 | 0.253592  |
| H | 5.729622  | -3.035536 | 2.579300  |
| H | 1.542977  | -2.319140 | 3.251954  |
| H | 3.734712  | -3.103999 | 4.071100  |
| H | -1.393704 | -5.582219 | 2.001545  |
| H | 0.070048  | -3.626372 | 2.335740  |

|    |           |           |           |
|----|-----------|-----------|-----------|
| H  | -2.649914 | -5.865399 | -0.130592 |
| H  | -2.392677 | -4.178375 | -1.950636 |
| H  | -0.891158 | -2.219742 | -1.610165 |
| H  | 1.586979  | 0.223872  | 3.153238  |
| H  | 0.528785  | 2.086745  | 1.505314  |
| H  | 0.834481  | 2.615675  | 3.165057  |
| H  | -1.832242 | 2.324188  | 1.905797  |
| H  | -1.491609 | 2.822298  | 3.561768  |
| H  | -3.056692 | 1.405667  | 4.806706  |
| H  | -3.276950 | -0.323461 | 4.467194  |
| H  | -3.842768 | 0.893352  | 3.299452  |
| H  | 0.844275  | 0.976059  | 5.785415  |
| H  | -0.887209 | 1.039549  | 6.162858  |
| H  | -0.165432 | 2.264239  | 5.106444  |
| H  | 0.484718  | -1.377087 | 5.277168  |
| H  | -0.588730 | -1.931041 | 3.974763  |
| H  | -1.272222 | -1.276331 | 5.480665  |
| H  | -2.595071 | -2.322001 | 3.493140  |
| H  | -3.554249 | -3.564709 | 2.669427  |
| H  | -4.373568 | -2.282038 | 3.586965  |
| H  | -4.938059 | -0.995043 | -2.515288 |
| H  | -4.723205 | 0.718839  | -2.107103 |
| H  | -6.077143 | -0.195465 | -1.414238 |
| H  | -2.765908 | -1.517223 | -5.228527 |
| H  | -2.348238 | -1.386579 | -2.803532 |
| H  | -2.937770 | 0.566384  | -6.589473 |
| H  | -2.679382 | 2.784338  | -5.476147 |
| H  | -2.251682 | 2.920476  | -3.053947 |
| H  | -0.698629 | 5.592507  | -0.054077 |
| H  | -0.160389 | 3.271163  | -0.698019 |
| H  | -3.031580 | 6.220378  | 0.558949  |
| H  | -4.835157 | 4.501114  | 0.486472  |
| H  | -4.309381 | 2.176716  | -0.177660 |
| Cu | 0.836417  | 0.267955  | -1.177705 |
| H  | 0.349737  | 1.211874  | -3.517726 |
| H  | 2.176488  | 1.019000  | -3.365121 |
| H  | 0.015975  | -1.205255 | -3.294761 |

121

Figure 1\_pcl\_major01\_03 / electronic energy: -4987.95729939 a.u. / lowest freq: 12.42 cm-1

|   |           |           |           |
|---|-----------|-----------|-----------|
| B | 2.149838  | 1.721012  | -0.563473 |
| O | 1.984580  | 3.079009  | -0.289083 |
| O | 3.484526  | 1.389704  | -0.333868 |
| C | 3.257314  | 3.690127  | -0.030827 |
| C | 4.134248  | 2.454996  | 0.367794  |
| C | 3.093153  | 4.736867  | 1.060719  |
| C | 3.714245  | 4.354028  | -1.330021 |
| C | 4.057841  | 2.121998  | 1.859383  |
| C | 5.589446  | 2.531625  | -0.069334 |
| H | 3.014019  | 2.085350  | 2.202124  |
| H | 4.605829  | 2.850843  | 2.474969  |
| H | 4.499533  | 1.127729  | 2.024538  |
| H | 5.684290  | 2.605564  | -1.160821 |
| H | 6.121033  | 1.623679  | 0.253586  |
| H | 6.092445  | 3.398809  | 0.386171  |
| H | 3.841818  | 3.611178  | -2.131627 |
| H | 4.661774  | 4.898410  | -1.202713 |
| H | 2.946681  | 5.071856  | -1.655813 |
| H | 4.067382  | 5.160572  | 1.350061  |
| H | 2.614728  | 4.315139  | 1.954605  |
| H | 2.460213  | 5.560565  | 0.697063  |
| C | 1.819806  | -3.136828 | -2.891817 |
| C | 2.833353  | -4.082744 | -2.768474 |
| C | 2.109885  | -1.767549 | -3.024195 |
| C | 4.172261  | -3.687706 | -2.790845 |
| C | 3.463969  | -1.387390 | -3.055327 |
| C | 4.478936  | -2.335366 | -2.943516 |
| C | 1.008786  | -0.788348 | -3.111333 |
| C | 1.189340  | 0.577913  | -3.219086 |
| H | 5.522371  | -2.010512 | -2.967289 |
| H | 3.733066  | -0.333941 | -3.150784 |
| H | 4.968729  | -4.429115 | -2.693743 |
| H | 2.575783  | -5.138465 | -2.652598 |
| H | 0.776952  | -3.461863 | -2.873800 |
| P | 0.681091  | -1.241436 | 0.549600  |
| C | 3.397058  | -1.754560 | 0.450874  |
| C | 4.634866  | -2.201019 | 0.913645  |
| C | 2.267509  | -1.809566 | 1.272509  |
| C | 4.759736  | -2.690613 | 2.212169  |
| C | 2.403671  | -2.295186 | 2.581272  |
| C | 3.641494  | -2.731423 | 3.048191  |
| C | -1.289002 | -4.844326 | 1.202012  |
| C | -0.457737 | -3.741269 | 1.386721  |
| C | -0.312862 | -2.786300 | 0.372554  |
| C | -1.992306 | -5.003859 | 0.006274  |
| C | -1.850173 | -4.061136 | -1.009992 |
| C | -1.008993 | -2.965172 | -0.823942 |
| C | 0.526737  | 0.445768  | 2.975401  |
| C | -0.160020 | -0.412859 | 1.925471  |
| C | -1.490037 | -0.271419 | 2.100158  |
| C | 0.247660  | 1.915187  | 2.552084  |
| C | -1.266827 | 2.055939  | 2.804822  |
| C | -1.686614 | 0.647775  | 3.325184  |
| C | -3.038005 | 0.645988  | 4.009557  |
| C | -0.432516 | 0.258996  | 4.183134  |
| C | -0.148214 | 1.196666  | 5.361146  |
| C | -0.457411 | -1.163663 | 4.747457  |
| C | -2.617337 | -0.730717 | 1.249940  |

|    |           |           |           |
|----|-----------|-----------|-----------|
| C  | -3.536983 | -1.648647 | 1.693995  |
| C  | -2.959285 | -0.183450 | -0.060422 |
| S  | -4.846820 | -1.799332 | 0.577897  |
| C  | -4.182360 | -0.631063 | -0.513732 |
| C  | -3.517902 | -2.495088 | 2.926966  |
| C  | -5.016758 | -0.255944 | -1.702464 |
| P  | -1.747150 | 0.853064  | -0.979591 |
| C  | -2.650688 | -0.539514 | -4.753660 |
| C  | -2.405063 | -0.463907 | -3.385495 |
| C  | -2.748853 | 0.626002  | -5.515103 |
| C  | -2.264890 | 0.776437  | -2.745747 |
| C  | -2.603892 | 1.863991  | -4.892737 |
| C  | -2.363389 | 1.939803  | -3.519866 |
| C  | -1.496304 | 4.846948  | -0.092516 |
| C  | -1.196507 | 3.538040  | -0.473061 |
| C  | -2.800546 | 5.197049  | 0.253520  |
| C  | -2.205868 | 2.569444  | -0.513983 |
| C  | -3.811251 | 4.234371  | 0.213553  |
| C  | -3.515925 | 2.927625  | -0.168488 |
| H  | 3.310401  | -1.339781 | -0.553146 |
| H  | 5.504446  | -2.155718 | 0.253471  |
| H  | 5.729385  | -3.036229 | 2.579086  |
| H  | 1.542775  | -2.319598 | 3.251719  |
| H  | 3.734436  | -3.104714 | 4.070831  |
| H  | -1.394109 | -5.582345 | 2.000863  |
| H  | 0.069755  | -3.626626 | 2.335334  |
| H  | -2.650219 | -5.865232 | -0.131374 |
| H  | -2.392761 | -4.178052 | -1.951240 |
| H  | -0.891129 | -2.219552 | -1.610493 |
| H  | 1.586957  | 0.223473  | 3.153239  |
| H  | 0.528803  | 2.086525  | 1.505495  |
| H  | 0.834539  | 2.615299  | 3.165282  |
| H  | -1.832208 | 2.324034  | 1.906031  |
| H  | -1.491536 | 2.821953  | 3.562054  |
| H  | -3.056683 | 1.405278  | 4.806820  |
| H  | -3.276969 | -0.323823 | 4.467195  |
| H  | -3.842775 | 0.893076  | 3.299538  |
| H  | 0.844284  | 0.975396  | 5.785504  |
| H  | -0.887199 | 1.038959  | 6.162942  |
| H  | -0.165338 | 2.263702  | 5.106646  |
| H  | 0.484643  | -1.377674 | 5.277007  |
| H  | -0.588857 | -1.931446 | 3.974566  |
| H  | -1.272288 | -1.276853 | 5.480546  |
| H  | -2.595176 | -2.322291 | 3.492862  |
| H  | -3.554469 | -3.564858 | 2.669068  |
| H  | -4.373668 | -2.282205 | 3.586736  |
| H  | -4.938081 | -0.994637 | -2.515423 |
| H  | -4.723173 | 0.719199  | -2.107070 |
| H  | -6.077156 | -0.195125 | -1.414316 |
| H  | -2.765904 | -1.516669 | -5.228669 |
| H  | -2.348253 | -1.386252 | -2.803662 |
| H  | -2.937693 | 0.567065  | -6.589434 |
| H  | -2.679246 | 2.784912  | -5.475909 |
| H  | -2.251564 | 2.920822  | -3.053694 |
| H  | -0.698435 | 5.592519  | -0.053542 |
| H  | -0.160281 | 3.271220  | -0.697720 |
| H  | -3.031360 | 6.220409  | 0.559566  |
| H  | -4.834999 | 4.501219  | 0.486920  |
| H  | -4.309310 | 2.176868  | -0.177452 |
| Cu | 0.836500  | 0.268056  | -1.177634 |
| H  | 0.349835  | 1.212282  | -3.517533 |
| H  | 2.176583  | 1.019365  | -3.364964 |
| H  | 0.016039  | -1.204870 | -3.294861 |

121

Figure 1\_ts(CuBadd)\_major01\_01 / electronic energy: -4987.95489151 a.u. / lowest freq: -155.31 cm<sup>-1</sup>

|   |          |           |           |
|---|----------|-----------|-----------|
| B | 2.321262 | 0.631883  | -1.431413 |
| O | 2.236361 | 1.650687  | -2.361791 |
| O | 3.575633 | 0.635534  | -0.840652 |
| C | 3.532311 | 2.254119  | -2.527748 |
| C | 4.255090 | 1.849455  | -1.193871 |
| C | 3.355686 | 3.750445  | -2.728955 |
| C | 4.163848 | 1.624444  | -3.767707 |
| C | 4.019220 | 2.843440  | -0.056636 |
| C | 5.742063 | 1.564723  | -1.335809 |
| H | 2.949281 | 3.066264  | 0.059066  |
| H | 4.560088 | 3.787590  | -0.216824 |
| H | 4.372108 | 2.396563  | 0.884727  |
| H | 5.933806 | 0.735567  | -2.029572 |
| H | 6.162292 | 1.290170  | -0.356718 |
| H | 6.277356 | 2.456013  | -1.697285 |
| H | 4.306372 | 0.540915  | -3.640620 |
| H | 5.137639 | 2.077652  | -4.003695 |
| H | 3.495293 | 1.779083  | -4.627570 |
| H | 4.331478 | 4.258305  | -2.764321 |
| H | 2.755403 | 4.197726  | -1.926050 |
| H | 2.840649 | 3.940770  | -3.682552 |
| C | 1.716080 | -4.558749 | -0.259989 |
| C | 2.477408 | -5.353208 | 0.589672  |
| C | 2.201168 | -3.326874 | -0.758752 |
| C | 3.763177 | -4.958475 | 0.973488  |
| C | 3.509028 | -2.954346 | -0.371454 |
| C | 4.269012 | -3.755344 | 0.478401  |
| C | 1.361447 | -2.503798 | -1.618191 |
| C | 1.844952 | -1.349624 | -2.319555 |
| H | 5.273620 | -3.428788 | 0.762910  |
| H | 3.928345 | -2.009224 | -0.726726 |
| H | 4.361114 | -5.581374 | 1.642805  |

|    |           |           |           |
|----|-----------|-----------|-----------|
| H  | 2.062660  | -6.294978 | 0.960552  |
| H  | 0.712327  | -4.884661 | -0.550359 |
| P  | 0.522358  | -0.224412 | 1.468033  |
| C  | 3.200345  | -0.451589 | 2.169343  |
| C  | 4.317581  | -0.320552 | 2.995625  |
| C  | 1.951863  | 0.012751  | 2.590031  |
| C  | 4.194880  | 0.287087  | 4.243461  |
| C  | 1.834673  | 0.623377  | 3.846865  |
| C  | 2.951063  | 0.762174  | 4.667546  |
| C  | -1.941129 | -2.169360 | 4.175700  |
| C  | -1.166345 | -1.187065 | 3.564360  |
| C  | -0.519250 | -1.453221 | 2.351189  |
| C  | -2.077919 | -3.427032 | 3.582683  |
| C  | -1.430963 | -3.700277 | 2.379343  |
| C  | -0.655683 | -2.714924 | 1.766998  |
| C  | 0.292170  | 2.698411  | 1.609437  |
| C  | -0.383178 | 1.335739  | 1.595234  |
| C  | -1.702121 | 1.545305  | 1.412533  |
| C  | 0.199970  | 3.212220  | 0.144372  |
| C  | -1.311688 | 3.465712  | -0.027746 |
| C  | -1.912442 | 3.072115  | 1.357677  |
| C  | -3.311687 | 3.611242  | 1.572914  |
| C  | -0.782509 | 3.558071  | 2.328881  |
| C  | -0.511931 | 5.065403  | 2.288747  |
| C  | -0.995886 | 3.184585  | 3.797524  |
| C  | -2.787049 | 0.581732  | 1.111898  |
| C  | -3.843869 | 0.387918  | 1.966363  |
| C  | -2.943908 | -0.133985 | -0.148945 |
| S  | -5.056736 | -0.595608 | 1.230161  |
| C  | -4.165861 | -0.768981 | -0.243411 |
| C  | -4.022033 | 0.858694  | 3.374114  |
| C  | -4.836775 | -1.512898 | -1.359788 |
| P  | -1.568969 | -0.234553 | -1.366279 |
| C  | -2.175944 | -4.205280 | -2.230218 |
| C  | -2.098155 | -2.984253 | -1.568824 |
| C  | -2.020304 | -4.264425 | -3.617438 |
| C  | -1.881530 | -1.796433 | -2.282969 |
| C  | -1.792188 | -3.091327 | -4.332569 |
| C  | -1.724554 | -1.862974 | -3.670714 |
| C  | -1.098690 | 2.704957  | -4.177354 |
| C  | -0.872460 | 1.686960  | -3.250155 |
| C  | -2.398634 | 3.124851  | -4.454066 |
| C  | -1.948786 | 1.072829  | -2.598774 |
| C  | -3.475623 | 2.521591  | -3.801595 |
| C  | -3.253024 | 1.501757  | -2.878597 |
| H  | 3.299950  | -0.902721 | 1.182423  |
| H  | 5.287275  | -0.691815 | 2.655291  |
| H  | 5.069584  | 0.395009  | 4.889474  |
| H  | 0.868423  | 1.005209  | 4.184090  |
| H  | 2.850783  | 1.244136  | 5.642892  |
| H  | -2.446654 | -1.952705 | 5.119817  |
| H  | -1.080242 | -0.201820 | 4.027852  |
| H  | -2.690616 | -4.193651 | 4.063086  |
| H  | -1.530412 | -4.681494 | 1.908917  |
| H  | -0.155159 | -2.916147 | 0.816825  |
| H  | 1.303588  | 2.725079  | 2.037033  |
| H  | 0.593697  | 2.472786  | -0.564565 |
| H  | 0.786914  | 4.133594  | 0.016031  |
| H  | -1.761852 | 2.870477  | -0.831008 |
| H  | -1.531614 | 4.520177  | -0.252787 |
| H  | -3.322090 | 4.702588  | 1.425465  |
| H  | -3.691681 | 3.407962  | 2.583688  |
| H  | -4.020579 | 3.175839  | 0.851102  |
| H  | 0.419342  | 5.293813  | 2.831607  |
| H  | -1.324809 | 5.612691  | 2.791935  |
| H  | -0.413101 | 5.482679  | 1.278775  |
| H  | -0.123295 | 3.488056  | 4.397703  |
| H  | -1.146375 | 2.108621  | 3.950032  |
| H  | -1.872372 | 3.709960  | 4.209394  |
| H  | -3.161565 | 1.462495  | 3.686115  |
| H  | -4.095078 | 0.004466  | 4.065735  |
| H  | -4.933654 | 1.463884  | 3.496703  |
| H  | -4.781461 | -2.603369 | -1.217616 |
| H  | -4.383870 | -1.281929 | -2.330263 |
| H  | -5.901433 | -1.238574 | -1.410390 |
| H  | -2.353121 | -5.119768 | -1.658973 |
| H  | -2.210473 | -2.953271 | -0.482793 |
| H  | -2.074802 | -5.224067 | -4.136404 |
| H  | -1.664761 | -3.126239 | -5.417158 |
| H  | -1.545660 | -0.952556 | -4.247817 |
| H  | -0.248353 | 3.180587  | -4.672075 |
| H  | 0.155318  | 1.401726  | -3.012721 |
| H  | -2.575046 | 3.927543  | -5.174223 |
| H  | -4.496598 | 2.851151  | -4.008322 |
| H  | -4.103457 | 1.051687  | -2.362124 |
| Cu | 0.852673  | -0.603089 | -0.734959 |
| H  | 1.288901  | -1.052166 | -3.215993 |
| H  | 2.927464  | -1.247084 | -2.465049 |
| H  | 0.440771  | -2.968525 | -1.973342 |

121

Figure 1\_ts(CuBadd)\_major01\_02 / electronic energy: -4987.95448195 a.u. / lowest freq: -142.45 cm-1

|   |          |           |          |
|---|----------|-----------|----------|
| B | 2.264962 | -0.470333 | 1.549168 |
| O | 2.179272 | -1.453554 | 2.517362 |
| O | 3.534675 | -0.464838 | 0.993858 |
| C | 3.481098 | -2.031314 | 2.726582 |
| C | 4.220109 | -1.660570 | 1.392293 |
| C | 3.322924 | -3.522533 | 2.976178 |

|   |           |           |           |
|---|-----------|-----------|-----------|
| C | 4.082700  | -1.350172 | 3.953811  |
| C | 4.007409  | -2.690535 | 0.282284  |
| C | 5.702611  | -1.359073 | 1.545314  |
| H | 2.941598  | -2.932162 | 0.167137  |
| H | 4.560338  | -3.621945 | 0.473382  |
| H | 4.360662  | -2.265480 | -0.669178 |
| H | 5.877932  | -0.505911 | 2.213824  |
| H | 6.133829  | -1.113616 | 0.563289  |
| H | 6.239856  | -2.233523 | 1.943215  |
| H | 4.213572  | -0.270087 | 3.790194  |
| H | 5.057422  | -1.782621 | 4.222629  |
| H | 3.400618  | -1.482367 | 4.806784  |
| H | 4.305289  | -4.014252 | 3.044612  |
| H | 2.742393  | -4.006424 | 2.179948  |
| H | 2.795421  | -3.688399 | 3.927600  |
| C | 1.454308  | 4.601768  | -0.000121 |
| C | 2.196926  | 5.389275  | -0.872154 |
| C | 2.008405  | 3.460105  | 0.624721  |
| C | 3.530883  | 5.077249  | -1.154291 |
| C | 3.360820  | 3.169682  | 0.335441  |
| C | 4.102549  | 3.963509  | -0.537458 |
| C | 1.190134  | 2.647352  | 1.516295  |
| C | 1.709462  | 1.569103  | 2.305863  |
| H | 5.145430  | 3.703685  | -0.741113 |
| H | 3.833717  | 2.295090  | 0.789593  |
| H | 4.114978  | 5.695505  | -1.839918 |
| H | 1.730295  | 6.261100  | -1.339488 |
| H | 0.412103  | 4.861437  | 0.210063  |
| P | 0.622222  | 0.155808  | -1.436344 |
| C | 3.309063  | 0.512770  | -1.998591 |
| C | 4.497966  | 0.356967  | -2.710913 |
| C | 2.140871  | -0.128230 | -2.419044 |
| C | 4.530441  | -0.454334 | -3.843917 |
| C | 2.178561  | -0.937875 | -3.562918 |
| C | 3.368545  | -1.103023 | -4.268458 |
| C | -1.553377 | 1.837542  | -4.533991 |
| C | -0.753968 | 0.963162  | -3.802434 |
| C | -0.384890 | 1.277577  | -2.488567 |
| C | -1.994618 | 3.032304  | -3.959707 |
| C | -1.620979 | 3.355980  | -2.656945 |
| C | -0.814228 | 2.482050  | -1.927265 |
| C | 0.400832  | -2.785701 | -1.430549 |
| C | -0.262614 | -1.420689 | -1.519578 |
| C | -1.591254 | -1.614737 | -1.402449 |
| C | 0.213829  | -3.233778 | 0.047284  |
| C | -1.306329 | -3.481880 | 0.133225  |
| C | -1.817112 | -3.137190 | -1.299469 |
| C | -3.205177 | -3.671703 | -1.585051 |
| C | -0.634240 | -3.668043 | -2.180030 |
| C | -0.379155 | -5.173776 | -2.061926 |
| C | -0.756392 | -3.354118 | -3.673674 |
| C | -2.687405 | -0.636583 | -1.197799 |
| C | -3.690054 | -0.466445 | -2.119602 |
| C | -2.929658 | 0.100332  | 0.038385  |
| S | -4.958959 | 0.512379  | -1.475224 |
| C | -4.165188 | 0.715152  | 0.049086  |
| C | -3.784194 | -0.978552 | -3.521283 |
| C | -4.919249 | 1.448841  | 1.118246  |
| P | -1.622720 | 0.269455  | 1.321243  |
| C | -2.418859 | 4.229137  | 2.117379  |
| C | -2.274234 | 3.006183  | 1.470631  |
| C | -2.297313 | 4.308372  | 3.506656  |
| C | -2.024266 | 1.834344  | 2.200458  |
| C | -2.035858 | 3.152677  | 4.238429  |
| C | -1.901353 | 1.922313  | 3.590858  |
| C | -1.204798 | -2.612168 | 4.201001  |
| C | -0.961329 | -1.603100 | 3.268345  |
| C | -2.505970 | -3.056025 | 4.430101  |
| C | -2.022144 | -1.023738 | 2.562539  |
| C | -3.567636 | -2.485129 | 3.725189  |
| C | -3.327999 | -1.475197 | 2.795795  |
| H | 3.288036  | 1.124855  | -1.097326 |
| H | 5.402947  | 0.865434  | -2.370024 |
| H | 5.463588  | -0.586470 | -4.396924 |
| H | 1.278997  | -1.456417 | -3.899712 |
| H | 3.389253  | -1.742414 | -5.154276 |
| H | -1.838435 | 1.584446  | -5.557969 |
| H | -0.426347 | 0.026186  | -4.258648 |
| H | -2.627822 | 3.712373  | -4.534543 |
| H | -1.956650 | 4.291998  | -2.203992 |
| H | -0.516696 | 2.721032  | -0.902910 |
| H | 1.436818  | -2.838482 | -1.789676 |
| H | 0.563683  | -2.461981 | 0.745569  |
| H | 0.790984  | -4.147255 | 0.254090  |
| H | -1.805806 | -2.859689 | 0.884333  |
| H | -1.541793 | -4.528004 | 0.380068  |
| H | -3.239626 | -4.756214 | -1.396366 |
| H | -3.512186 | -3.503864 | -2.626883 |
| H | -3.955293 | -3.199398 | -0.931493 |
| H | 0.571051  | -5.432445 | -2.556108 |
| H | -1.175946 | -5.737347 | -2.572882 |
| H | -0.324169 | -5.545143 | -1.031028 |
| H | 0.144644  | -3.694796 | -4.207991 |
| H | -0.883473 | -2.283749 | -3.879843 |
| H | -1.614175 | -3.886998 | -4.114441 |
| H | -2.886102 | -1.554049 | -3.776314 |
| H | -3.860309 | -0.146920 | -4.239118 |

|    |           |           |           |
|----|-----------|-----------|-----------|
| H  | -4.663732 | -1.624858 | -3.667204 |
| H  | -4.927425 | 2.536442  | 0.946777  |
| H  | -4.488904 | 1.271609  | 2.109804  |
| H  | -5.965887 | 1.108735  | 1.139521  |
| H  | -2.622212 | 5.129441  | 1.532533  |
| H  | -2.365556 | 2.961221  | 0.383302  |
| H  | -2.404631 | 5.269615  | 4.014290  |
| H  | -1.934313 | 3.202767  | 5.325151  |
| H  | -1.697140 | 1.026663  | 4.182446  |
| H  | -0.366180 | -3.062646 | 4.737464  |
| H  | 0.068945  | -1.297379 | 3.070473  |
| H  | -2.695310 | -3.852201 | 5.154195  |
| H  | -4.589013 | -2.833911 | 3.895107  |
| H  | -4.164698 | -1.052110 | 2.235880  |
| Cu | 0.779523  | 0.682017  | 0.754710  |
| H  | 1.152433  | 1.308052  | 3.212803  |
| H  | 2.792832  | 1.516730  | 2.467669  |
| H  | 0.236777  | 3.085214  | 1.814284  |

121

Figure 1\_ts(CuBadd)\_major01\_03 / electronic energy: -4987.95448188 a.u. / lowest freq: -142.46 cm<sup>-1</sup>

|   |           |           |           |
|---|-----------|-----------|-----------|
| B | 2.264996  | -0.470245 | 1.549137  |
| O | 2.179336  | -1.453444 | 2.517357  |
| O | 3.534691  | -0.464764 | 0.993787  |
| C | 3.481167  | -2.031208 | 2.726541  |
| C | 4.220134  | -1.660491 | 1.392219  |
| C | 3.322993  | -3.522422 | 2.976169  |
| C | 4.082818  | -1.350047 | 3.953736  |
| C | 4.007394  | -2.690476 | 0.282235  |
| C | 5.702642  | -1.358997 | 1.545184  |
| H | 2.941579  | -2.932108 | 0.167133  |
| H | 4.560332  | -3.621881 | 0.473330  |
| H | 4.360611  | -2.265437 | -0.669246 |
| H | 5.877987  | -0.505820 | 2.213671  |
| H | 6.133828  | -1.113562 | 0.563139  |
| H | 6.239897  | -2.233439 | 1.943086  |
| H | 4.213689  | -0.269966 | 3.790094  |
| H | 5.057547  | -1.782498 | 4.222525  |
| H | 3.400766  | -1.482224 | 4.806736  |
| H | 4.305356  | -4.014150 | 3.044558  |
| H | 2.742413  | -4.006320 | 2.179979  |
| H | 2.795540  | -3.688268 | 3.927622  |
| C | 3.360793  | 3.169749  | 0.335258  |
| C | 4.102486  | 3.963553  | -0.537694 |
| C | 2.008374  | 3.460147  | 0.624544  |
| C | 3.530778  | 5.077243  | -1.154575 |
| C | 1.454233  | 4.601760  | -0.000352 |
| C | 2.196816  | 5.389244  | -0.872436 |
| C | 1.190144  | 2.647418  | 1.516179  |
| C | 1.709522  | 1.569208  | 2.305771  |
| H | 1.730152  | 6.261031  | -1.339809 |
| H | 0.412024  | 4.861409  | 0.209833  |
| H | 4.114845  | 5.695481  | -1.840243 |
| H | 5.145372  | 3.703748  | -0.741350 |
| H | 3.833723  | 2.295195  | 0.789448  |
| P | 0.622212  | 0.155785  | -1.436347 |
| C | 3.309036  | 0.512775  | -1.998646 |
| C | 4.497933  | 0.356966  | -2.710976 |
| C | 2.140855  | -0.128278 | -2.419049 |
| C | 4.530417  | -0.454397 | -3.843935 |
| C | 2.178552  | -0.937984 | -3.562880 |
| C | 3.368532  | -1.103141 | -4.268425 |
| C | -1.553373 | 1.837341  | -4.534094 |
| C | -0.753922 | 0.963035  | -3.802495 |
| C | -0.384925 | 1.277490  | -2.488616 |
| C | -1.994742 | 3.032068  | -3.959837 |
| C | -1.621186 | 3.355784  | -2.657061 |
| C | -0.814387 | 2.481932  | -1.927341 |
| C | 0.400810  | -2.785734 | -1.430486 |
| C | -0.262624 | -1.420715 | -1.519519 |
| C | -1.591264 | -1.614748 | -1.402364 |
| C | 0.213824  | -3.233795 | 0.047354  |
| C | -1.306335 | -3.481888 | 0.133316  |
| C | -1.817136 | -3.137198 | -1.299370 |
| C | -3.205212 | -3.671695 | -1.584928 |
| C | -0.634283 | -3.668069 | -2.179946 |
| C | -0.379212 | -5.173805 | -2.061834 |
| C | -0.756450 | -3.354154 | -3.673591 |
| C | -2.687397 | -0.636573 | -1.197712 |
| C | -3.690049 | -0.466429 | -2.119510 |
| C | -2.929627 | 0.100364  | 0.038464  |
| S | -4.958930 | 0.512430  | -1.475138 |
| C | -4.165146 | 0.715205  | 0.049165  |
| C | -3.784212 | -0.978554 | -3.521184 |
| C | -4.919199 | 1.448902  | 1.118327  |
| P | -1.622675 | 0.269484  | 1.321310  |
| C | -2.418833 | 4.229141  | 2.117570  |
| C | -2.274178 | 3.006212  | 1.470782  |
| C | -2.297329 | 4.308327  | 3.506853  |
| C | -2.024227 | 1.834346  | 2.200574  |
| C | -2.035883 | 3.152608  | 4.238591  |
| C | -1.901351 | 1.922268  | 3.590980  |
| C | -1.204714 | -2.612202 | 4.201000  |
| C | -0.961254 | -1.603112 | 3.268366  |
| C | -2.505883 | -3.056064 | 4.430103  |
| C | -2.022076 | -1.023736 | 2.562583  |
| C | -3.567557 | -2.485149 | 3.725219  |
| C | -3.327930 | -1.475195 | 2.795847  |

|    |           |           |           |
|----|-----------|-----------|-----------|
| H  | 3.288005  | 1.124909  | -1.097414 |
| H  | 5.402906  | 0.865477  | -2.370128 |
| H  | 5.463559  | -0.586539 | -4.396947 |
| H  | 1.278998  | -1.456565 | -3.899636 |
| H  | 3.389245  | -1.742582 | -5.154207 |
| H  | -1.838367 | 1.584212  | -5.558081 |
| H  | -0.426205 | 0.026080  | -4.258686 |
| H  | -2.627980 | 3.712079  | -4.534703 |
| H  | -1.956959 | 4.291777  | -2.204130 |
| H  | -0.516913 | 2.720950  | -0.902977 |
| H  | 1.436790  | -2.838529 | -1.789627 |
| H  | 0.563689  | -2.461991 | 0.745626  |
| H  | 0.790977  | -4.147272 | 0.254163  |
| H  | -1.805798 | -2.859693 | 0.884429  |
| H  | -1.541802 | -4.528010 | 0.380165  |
| H  | -3.239674 | -4.756204 | -1.396237 |
| H  | -3.512236 | -3.503855 | -2.626755 |
| H  | -3.955311 | -3.199375 | -0.931360 |
| H  | 0.570982  | -5.432488 | -2.556032 |
| H  | -1.176018 | -5.737370 | -2.572772 |
| H  | -0.324211 | -5.545164 | -1.030934 |
| H  | 0.144570  | -3.694859 | -4.207918 |
| H  | -0.883508 | -2.283785 | -3.879770 |
| H  | -1.614251 | -3.887020 | -4.114341 |
| H  | -2.886139 | -1.554082 | -3.776211 |
| H  | -3.860303 | -0.146929 | -4.239029 |
| H  | -4.663771 | -1.624834 | -3.667090 |
| H  | -4.927359 | 2.536504  | 0.946865  |
| H  | -4.488862 | 1.271656  | 2.109885  |
| H  | -5.965842 | 1.108813  | 1.139594  |
| H  | -2.622174 | 5.129465  | 1.532751  |
| H  | -2.365468 | 2.961291  | 0.383450  |
| H  | -2.404669 | 5.269551  | 4.014519  |
| H  | -1.934368 | 3.202659  | 5.325319  |
| H  | -1.697147 | 1.026601  | 4.182544  |
| H  | -0.366090 | -3.062693 | 4.737444  |
| H  | 0.069017  | -1.297381 | 3.070493  |
| H  | -2.695216 | -3.852258 | 5.154180  |
| H  | -4.588934 | -2.833931 | 3.895143  |
| H  | -4.164635 | -1.052090 | 2.235953  |
| Cu | 0.779519  | 0.682066  | 0.754689  |
| H  | 1.152540  | 1.308190  | 3.212749  |
| H  | 2.792901  | 1.516859  | 2.467528  |
| H  | 0.236795  | 3.085281  | 1.814190  |

121

Figure 1\_ts(CuBadd)\_major01\_04 / electronic energy: -4987.94957683 a.u. / lowest freq: -183.19 cm<sup>-1</sup>

|   |           |           |           |
|---|-----------|-----------|-----------|
| P | 0.834443  | -0.920921 | 0.907577  |
| C | 0.510961  | 1.363039  | 2.467311  |
| C | 0.534232  | 2.118688  | 3.638379  |
| C | 0.959172  | 0.037260  | 2.469328  |
| C | 1.026618  | 1.561208  | 4.818167  |
| C | 1.451997  | -0.516781 | 3.656497  |
| C | 1.489943  | 0.244708  | 4.823710  |
| C | 3.133915  | -4.346279 | 0.787601  |
| C | 2.039075  | -3.480816 | 0.784536  |
| C | 2.218867  | -2.115006 | 1.013329  |
| C | 4.416303  | -3.852834 | 1.017963  |
| C | 4.603763  | -2.485724 | 1.230255  |
| C | 3.514143  | -1.619582 | 1.220791  |
| C | -1.077207 | -2.588533 | 2.440653  |
| C | -0.676439 | -1.880764 | 1.154935  |
| C | -1.747854 | -1.899042 | 0.337379  |
| C | -2.053402 | -1.601888 | 3.144562  |
| C | -3.286282 | -1.637013 | 2.215332  |
| C | -2.874669 | -2.632801 | 1.083481  |
| C | -4.036660 | -3.123001 | 0.245367  |
| C | -2.049676 | -3.680761 | 1.906987  |
| C | -2.838336 | -4.400908 | 3.006569  |
| C | -1.391001 | -4.768943 | 1.059031  |
| C | -1.911861 | -1.288556 | -1.003468 |
| C | -1.725236 | -2.020771 | -2.151086 |
| C | -2.330167 | 0.074643  | -1.265669 |
| S | -2.076515 | -1.064168 | -3.542001 |
| C | -2.465570 | 0.336131  | -2.613743 |
| C | -1.246646 | -3.431637 | -2.298452 |
| C | -2.888015 | 1.582803  | -3.329095 |
| P | -2.620868 | 1.236398  | 0.119997  |
| C | -2.716203 | 5.154403  | -1.276531 |
| C | -3.132858 | 3.912299  | -0.796485 |
| C | -1.368151 | 5.391227  | -1.546273 |
| C | -2.204188 | 2.886796  | -0.582970 |
| C | -0.433165 | 4.380033  | -1.321975 |
| C | -0.850449 | 3.142725  | -0.837195 |
| C | -6.382020 | 1.959991  | 1.567206  |
| C | -5.003146 | 1.914888  | 1.372952  |
| C | -7.237757 | 1.356871  | 0.643768  |
| C | -4.457849 | 1.286732  | 0.242532  |
| C | -6.705517 | 0.715847  | -0.473993 |
| C | -5.324653 | 0.682271  | -0.675361 |
| H | 0.151002  | 1.815022  | 1.541832  |
| H | 0.175561  | 3.150329  | 3.622640  |
| H | 1.054607  | 2.154050  | 5.735577  |
| H | 1.817831  | -1.546284 | 3.673270  |
| H | 1.884018  | -0.194004 | 5.743334  |
| H | 2.978567  | -5.412200 | 0.606570  |
| H | 1.040726  | -3.877133 | 0.601295  |
| H | 5.272249  | -4.531846 | 1.020634  |



|    |           |           |           |
|----|-----------|-----------|-----------|
| H  | 5.607849  | -2.086928 | 1.393122  |
| H  | 3.674807  | -0.547520 | 1.352298  |
| H  | -0.246100 | -2.940363 | 3.067700  |
| H  | -1.614824 | -0.598265 | 3.227080  |
| H  | -2.290477 | -1.939585 | 4.163649  |
| H  | -3.540788 | -0.653065 | 1.805556  |
| H  | -4.186702 | -2.009084 | 2.725767  |
| H  | -4.769889 | -3.652192 | 0.873572  |
| H  | -3.713682 | -3.809905 | -0.551075 |
| H  | -4.557948 | -2.278086 | -0.231369 |
| H  | -2.150268 | -4.994098 | 3.630173  |
| H  | -3.559202 | -5.104817 | 2.561569  |
| H  | -3.399848 | -3.738881 | 3.676709  |
| H  | -0.693908 | -5.363251 | 1.670935  |
| H  | -0.839437 | -4.370949 | 0.201660  |
| H  | -2.151904 | -5.463216 | 0.668799  |
| H  | -0.241330 | -3.546445 | -1.865480 |
| H  | -1.189337 | -3.729546 | -3.354375 |
| H  | -1.918723 | -4.137806 | -1.789066 |
| H  | -2.083407 | 2.334477  | -3.336575 |
| H  | -3.762721 | 2.038931  | -2.845613 |
| H  | -3.152576 | 1.366027  | -4.373919 |
| H  | -3.455182 | 5.941894  | -1.444111 |
| H  | -4.194542 | 3.742394  | -0.603915 |
| H  | -1.045862 | 6.365054  | -1.922843 |
| H  | 0.631291  | 4.545560  | -1.499357 |
| H  | -0.098812 | 2.368482  | -0.658157 |
| H  | -6.790609 | 2.456251  | 2.450641  |
| H  | -4.338191 | 2.371186  | 2.112673  |
| H  | -8.318768 | 1.381669  | 0.800233  |
| H  | -7.368768 | 0.236835  | -1.198275 |
| H  | -4.920841 | 0.175133  | -1.554594 |
| H  | 4.076256  | -4.742328 | -3.224369 |
| H  | 5.077942  | -2.851425 | -1.933199 |
| C  | 3.572824  | -3.773949 | -3.177281 |
| C  | 4.128197  | -2.714452 | -2.457786 |
| H  | 1.906625  | -4.377535 | -4.418437 |
| C  | 2.358629  | -3.565493 | -3.840994 |
| H  | 6.479323  | 1.907555  | 0.792493  |
| C  | 3.490023  | -1.478149 | -2.389339 |
| H  | 4.810409  | 1.233077  | 2.423604  |
| H  | 3.948721  | -0.681021 | -1.797433 |
| C  | 1.715020  | -2.335908 | -3.777279 |
| C  | 2.246041  | -1.254044 | -3.033722 |
| C  | 5.902681  | 2.786933  | 0.469117  |
| C  | 4.255260  | 2.164864  | 2.239170  |
| H  | 6.079783  | 2.929650  | -0.604851 |
| O  | 3.934766  | 1.491136  | -0.034865 |
| H  | 0.763608  | -2.195433 | -4.297948 |
| H  | 4.645870  | 2.931239  | 2.924368  |
| H  | 6.289770  | 3.664530  | 1.008779  |
| C  | 4.429052  | 2.572840  | 0.776024  |
| C  | 1.521629  | 0.002010  | -2.923516 |
| B  | 2.627899  | 1.768059  | -0.392359 |
| H  | 3.242034  | 1.301485  | -2.527391 |
| C  | 2.151529  | 1.214894  | -2.417988 |
| C  | 3.489249  | 3.759346  | 0.351642  |
| H  | 4.263177  | 3.863055  | -1.687582 |
| O  | 2.302003  | 3.067644  | -0.077646 |
| H  | 4.901806  | 5.130984  | -0.605102 |
| H  | 4.014283  | 5.202394  | 1.886762  |
| C  | 4.010667  | 4.536947  | -0.855229 |
| H  | 1.641947  | 2.148842  | -2.683371 |
| C  | 3.118274  | 4.714043  | 1.474641  |
| H  | 3.228619  | 5.227638  | -1.204305 |
| H  | 2.449607  | 5.498144  | 1.089090  |
| Cu | 1.305052  | 0.290822  | -0.885408 |
| H  | 0.596183  | 0.097057  | -3.496694 |
| H  | 3.198472  | 1.983527  | 2.483136  |
| H  | 2.593624  | 4.196063  | 2.288331  |

121

Figure 1\_ts(CuBadd)\_major01\_05 / electronic energy: -4987.94957683 a.u. / lowest freq: -183.19 cm<sup>-1</sup>

|   |           |           |           |
|---|-----------|-----------|-----------|
| F | 0.834441  | -0.920913 | 0.907581  |
| C | 0.510951  | 1.363043  | 2.467318  |
| C | 0.534232  | 2.118695  | 3.638384  |
| C | 0.959184  | 0.037272  | 2.469328  |
| C | 1.026650  | 1.561224  | 4.818163  |
| C | 1.452041  | -0.516760 | 3.656489  |
| C | 1.489996  | 0.244732  | 4.823700  |
| C | 4.603765  | -2.485714 | 1.230229  |
| C | 3.514142  | -1.619574 | 1.220774  |
| C | 2.218866  | -2.115000 | 1.013322  |
| C | 4.416307  | -3.852823 | 1.017934  |
| C | 3.133918  | -4.346271 | 0.787580  |
| C | 2.039076  | -3.480810 | 0.784527  |
| C | -1.077208 | -2.588498 | 2.440686  |
| C | -0.676443 | -1.880747 | 1.154957  |
| C | -1.747859 | -1.899038 | 0.337403  |
| C | -2.053403 | -1.601846 | 3.144583  |
| C | -3.286283 | -1.636983 | 2.215355  |
| C | -2.874673 | -2.632787 | 1.083517  |
| C | -4.036668 | -3.123000 | 0.245415  |
| C | -2.049676 | -3.680735 | 1.907036  |
| C | -2.838333 | -4.400868 | 3.006628  |
| C | -1.390998 | -4.768926 | 1.059094  |
| C | -1.911866 | -1.288569 | -1.003452 |
| C | -1.725239 | -2.020800 | -2.151060 |

|    |           |           |           |
|----|-----------|-----------|-----------|
| C  | -2.330162 | 0.074629  | -1.265671 |
| S  | -2.076505 | -1.064212 | -3.541988 |
| C  | -2.465556 | 0.336101  | -2.613750 |
| C  | -1.246648 | -3.431668 | -2.298398 |
| C  | -2.887993 | 1.582767  | -3.329118 |
| P  | -2.620876 | 1.236392  | 0.119984  |
| C  | -2.716206 | 5.154388  | -1.276571 |
| C  | -3.132865 | 3.912286  | -0.796526 |
| C  | -1.368150 | 5.391217  | -1.546287 |
| C  | -2.204194 | 2.886788  | -0.582984 |
| C  | -0.433164 | 4.380029  | -1.321963 |
| C  | -0.850451 | 3.142723  | -0.837183 |
| C  | -6.382038 | 1.959984  | 1.567169  |
| C  | -5.003162 | 1.914882  | 1.372922  |
| C  | -7.237769 | 1.356863  | 0.643727  |
| C  | -4.457859 | 1.286726  | 0.242505  |
| C  | -6.705523 | 0.715842  | -0.474032 |
| C  | -5.324658 | 0.682266  | -0.675393 |
| H  | 0.150965  | 1.815018  | 1.541845  |
| H  | 0.175543  | 3.150330  | 3.622650  |
| H  | 1.054646  | 2.154068  | 5.735572  |
| H  | 1.817892  | -1.546256 | 3.673257  |
| H  | 1.884095  | -0.193972 | 5.743317  |
| H  | 5.607851  | -2.086915 | 1.393089  |
| H  | 3.674805  | -0.547512 | 1.352282  |
| H  | 5.272254  | -4.531834 | 1.020597  |
| H  | 2.978571  | -5.412191 | 0.606547  |
| H  | 1.040726  | -3.877130 | 0.601295  |
| H  | -0.246100 | -2.940317 | 3.067736  |
| H  | -1.614826 | -0.598221 | 3.227089  |
| H  | -2.290477 | -1.939530 | 4.163674  |
| H  | -3.540788 | -0.653041 | 1.805565  |
| H  | -4.186703 | -2.009045 | 2.725795  |
| H  | -4.769886 | -3.652192 | 0.873631  |
| H  | -3.713695 | -3.809906 | -0.551027 |
| H  | -4.557966 | -2.278091 | -0.231320 |
| H  | -2.150266 | -4.994056 | 3.630235  |
| H  | -3.559205 | -5.104779 | 2.561638  |
| H  | -3.399839 | -3.738833 | 3.676765  |
| H  | -0.693902 | -5.363223 | 1.671004  |
| H  | -0.839438 | -4.370940 | 0.201717  |
| H  | -2.151899 | -5.463207 | 0.668872  |
| H  | -1.918649 | -4.137808 | -1.788873 |
| H  | -0.241279 | -3.546440 | -1.865539 |
| H  | -1.189472 | -3.729650 | -3.354308 |
| H  | -2.083378 | 2.334434  | -3.336613 |
| H  | -3.762692 | 2.038910  | -2.845637 |
| H  | -3.152561 | 1.365978  | -4.373938 |
| H  | -3.455185 | 5.941875  | -1.444171 |
| H  | -4.194552 | 3.742378  | -0.603975 |
| H  | -1.045858 | 6.365043  | -1.922857 |
| H  | 0.631296  | 4.545559  | -1.499323 |
| H  | -0.098815 | 2.368486  | -0.658121 |
| H  | -6.790631 | 2.456243  | 2.450603  |
| H  | -4.338211 | 2.371179  | 2.112647  |
| H  | -8.318781 | 1.381661  | 0.800187  |
| H  | -7.368770 | 0.236830  | -1.198318 |
| H  | -4.920843 | 0.175132  | -1.554627 |
| H  | 4.076276  | -4.742315 | -3.224405 |
| H  | 5.077954  | -2.851415 | -1.933225 |
| C  | 3.572836  | -3.773940 | -3.177307 |
| C  | 4.128205  | -2.714445 | -2.457806 |
| H  | 1.906638  | -4.377529 | -4.418463 |
| C  | 2.358638  | -3.565487 | -3.841016 |
| H  | 6.479327  | 1.907575  | 0.792450  |
| C  | 3.490023  | -1.478146 | -2.389348 |
| H  | 4.810430  | 1.233050  | 2.423567  |
| H  | 3.948718  | -0.681018 | -1.797440 |
| C  | 1.715022  | -2.335907 | -3.777291 |
| C  | 2.246040  | -1.254044 | -3.033729 |
| C  | 5.902671  | 2.786953  | 0.469097  |
| C  | 4.255277  | 2.164839  | 2.239158  |
| H  | 6.079761  | 2.929691  | -0.604871 |
| O  | 3.934768  | 1.491141  | -0.034884 |
| H  | 0.763607  | -2.195435 | -4.297956 |
| H  | 4.645896  | 2.931203  | 2.924362  |
| H  | 6.289758  | 3.664545  | 1.008769  |
| C  | 4.429048  | 2.572839  | 0.776016  |
| C  | 1.521624  | 0.002008  | -2.923519 |
| B  | 2.627896  | 1.768056  | -0.392368 |
| H  | 3.242027  | 1.301486  | -2.527398 |
| C  | 2.151523  | 1.214894  | -2.417991 |
| C  | 3.489228  | 3.759342  | 0.351657  |
| H  | 4.263130  | 3.863103  | -1.687573 |
| O  | 2.301990  | 3.067633  | -0.077640 |
| H  | 4.901779  | 5.130999  | -0.605068 |
| H  | 4.014241  | 5.202393  | 1.886783  |
| C  | 4.010634  | 4.536973  | -0.855198 |
| H  | 1.641939  | 2.148841  | -2.683372 |
| C  | 3.118241  | 4.714016  | 1.474672  |
| H  | 3.228585  | 5.227677  | -1.204246 |
| H  | 2.449543  | 5.498098  | 1.089136  |
| Cu | 1.305057  | 0.290813  | -0.885412 |
| H  | 0.596171  | 0.097051  | -3.496687 |
| H  | 3.198493  | 1.983496  | 2.483137  |
| H  | 2.593616  | 4.196018  | 2.288366  |

Figure 1\_ts(CuBadd)\_major01\_06 / electronic energy: -4987.94669284 a.u. / lowest freq: -34.62 cm<sup>-1</sup>

|   |           |           |           |
|---|-----------|-----------|-----------|
| B | -2.851463 | 0.511325  | -0.393898 |
| O | -3.557503 | -0.683320 | -0.495222 |
| O | -3.702134 | 1.502676  | 0.066142  |
| C | -4.957598 | -0.427804 | -0.321209 |
| C | -4.935237 | 0.905632  | 0.500469  |
| C | -5.594516 | -1.613265 | 0.387153  |
| C | -5.567024 | -0.258436 | -1.713003 |
| C | -4.825341 | 0.666074  | 2.006337  |
| C | -6.081214 | 1.861568  | 0.208413  |
| H | -4.008816 | -0.033121 | 2.239648  |
| H | -5.758274 | 0.260224  | 2.424235  |
| H | -4.615577 | 1.620986  | 2.509049  |
| H | -6.091832 | 2.172941  | -0.844441 |
| H | -5.977076 | 2.767011  | 0.824905  |
| H | -7.050033 | 1.396470  | 0.447016  |
| H | -5.125267 | 0.598551  | -2.242999 |
| H | -6.656451 | -0.113727 | -1.667040 |
| H | -5.367685 | -1.164199 | -2.305551 |
| H | -6.651405 | -1.411260 | 0.620000  |
| H | -5.068313 | -1.861031 | 1.318442  |
| H | -5.554711 | -2.499649 | -0.263952 |
| C | 1.147258  | 2.390647  | -4.109661 |
| C | 1.806949  | 3.592474  | -4.356899 |
| C | 0.027306  | 2.330556  | -3.256119 |
| C | 1.370542  | 4.777019  | -3.759809 |
| C | -0.402652 | 3.538667  | -2.665626 |
| C | 0.259983  | 4.737128  | -2.912875 |
| C | -0.647593 | 1.053315  | -3.011067 |
| C | -1.985444 | 0.985553  | -2.555273 |
| H | -0.090724 | 5.652128  | -2.428118 |
| H | -1.246148 | 3.533092  | -1.970489 |
| H | 1.890570  | 5.719014  | -3.948336 |
| H | 2.673746  | 3.603260  | -5.023443 |
| H | 1.506553  | 1.470357  | -4.578786 |
| P | -0.289351 | -1.736342 | -0.638395 |
| C | -2.072498 | -2.830294 | -2.448540 |
| C | -2.567716 | -3.768858 | -3.353278 |
| C | -0.823067 | -3.016652 | -1.841000 |
| C | -1.819403 | -4.903241 | -3.666379 |
| C | -0.086696 | -4.169784 | -2.147703 |
| C | -0.580026 | -5.103784 | -3.057671 |
| C | -0.933146 | -4.340097 | 2.518398  |
| C | -0.551701 | -3.817302 | 1.283952  |
| C | -0.821360 | -2.481073 | 0.964998  |
| C | -1.584162 | -3.530424 | 3.450503  |
| C | -1.857692 | -2.199160 | 3.139372  |
| C | -1.483831 | -1.682098 | 1.900061  |
| C | 2.448259  | -2.084853 | -1.728977 |
| C | 1.510327  | -1.862173 | -0.554338 |
| C | 2.270092  | -1.503396 | 0.501212  |
| C | 3.004550  | -0.673471 | -2.078187 |
| C | 3.941853  | -0.378899 | -0.889492 |
| C | 3.744317  | -1.604047 | 0.048493  |
| C | 4.810375  | -1.714834 | 1.119194  |
| C | 3.647527  | -2.761662 | -1.010900 |
| C | 4.892252  | -2.929272 | -1.888813 |
| C | 3.328683  | -4.141981 | -0.430035 |
| C | 1.813330  | -0.984896 | 1.819141  |
| C | 2.005634  | -1.714160 | 2.968258  |
| C | 1.173543  | 0.308491  | 2.080755  |
| S | 1.489534  | -0.834573 | 4.355677  |
| C | 0.987948  | 0.534914  | 3.428919  |
| C | 2.522554  | -3.108079 | 3.131833  |
| C | 0.498094  | 1.716038  | 4.216721  |
| P | 0.689736  | 1.450778  | 0.708710  |
| C | -2.306344 | 3.637736  | 2.503060  |
| C | -1.537032 | 2.597322  | 1.991679  |
| C | -1.833159 | 4.949544  | 2.462164  |
| C | -0.266003 | 2.842817  | 1.457468  |
| C | -0.583424 | 5.209617  | 1.904311  |
| C | 0.196483  | 4.164245  | 1.408260  |
| C | 3.774685  | 3.421174  | -1.166256 |
| C | 2.563180  | 2.786907  | -0.893144 |
| C | 4.734488  | 3.556187  | -0.164884 |
| C | 2.298218  | 2.282950  | 0.382062  |
| C | 4.474995  | 3.061341  | 1.114665  |
| C | 3.263385  | 2.430503  | 1.387712  |
| H | -2.673633 | -1.959656 | -2.175448 |
| H | -3.544566 | -3.610922 | -3.816932 |
| H | -2.203336 | -5.635409 | -4.380896 |
| H | 0.877216  | -4.349609 | -1.669578 |
| H | 0.006589  | -5.996299 | -3.288503 |
| H | -0.717969 | -5.385105 | 2.754079  |
| H | -0.037582 | -4.461676 | 0.566924  |
| H | -1.878235 | -3.939272 | 4.420279  |
| H | -2.363230 | -1.557670 | 3.865310  |
| H | -1.693797 | -0.640657 | 1.650826  |
| H | 2.028171  | -2.620920 | -2.588977 |
| H | 2.185005  | 0.055501  | -2.163753 |
| H | 3.540604  | -0.682892 | -3.038548 |
| H | 3.705830  | 0.549658  | -0.367490 |
| H | 4.994375  | -0.308400 | -1.201620 |
| H | 5.812256  | -1.649115 | 0.666864  |
| H | 4.755156  | -2.664738 | 1.668596  |
| H | 4.726060  | -0.896519 | 1.851806  |
| H | 4.691352  | -3.661632 | -2.686829 |

|    |           |           |           |
|----|-----------|-----------|-----------|
| H  | 5.732049  | -3.320617 | -1.292460 |
| H  | 5.234012  | -2.006599 | -2.373336 |
| H  | 3.234395  | -4.883392 | -1.239606 |
| H  | 2.397819  | -4.162299 | 0.150620  |
| H  | 4.145305  | -4.486350 | 0.224678  |
| H  | 2.678630  | -3.574244 | 2.152507  |
| H  | 1.800974  | -3.729107 | 3.684448  |
| H  | 3.474998  | -3.133254 | 3.684242  |
| H  | -0.599781 | 1.748469  | 4.275889  |
| H  | 0.836291  | 2.664135  | 3.781728  |
| H  | 0.882032  | 1.666057  | 5.246039  |
| H  | -3.289191 | 3.424413  | 2.928952  |
| H  | -1.934148 | 1.581880  | 2.012946  |
| H  | -2.442418 | 5.766842  | 2.855249  |
| H  | -0.204857 | 6.233285  | 1.853472  |
| H  | 1.174112  | 4.393290  | 0.982042  |
| H  | 3.966542  | 3.801849  | -2.171929 |
| H  | 1.826380  | 2.664500  | -1.684253 |
| H  | 5.687555  | 4.045592  | -0.379404 |
| H  | 5.223728  | 3.161669  | 1.904001  |
| H  | 3.078542  | 2.033314  | 2.388224  |
| Cu | -0.859444 | 0.542672  | -0.912529 |
| H  | -2.572208 | 0.106446  | -2.834487 |
| H  | -2.576503 | 1.905447  | -2.503498 |
| H  | -0.230693 | 0.184107  | -3.528946 |

121

Figure 1\_L-Cu-alkyl\_major01\_01 / electronic energy: -4988.00639632 a.u. / lowest freq: 5.96 cm<sup>-1</sup>

|   |           |           |           |
|---|-----------|-----------|-----------|
| B | 3.707947  | 1.488549  | -0.882638 |
| O | 3.385854  | 2.655812  | -0.227835 |
| O | 4.520227  | 0.690176  | -0.113354 |
| C | 4.205254  | 2.745051  | 0.951960  |
| C | 4.559961  | 1.238251  | 1.216542  |
| C | 3.421492  | 3.421389  | 2.062469  |
| C | 5.427784  | 3.584882  | 0.583161  |
| C | 3.496849  | 0.505393  | 2.032100  |
| C | 5.936430  | 1.005316  | 1.816900  |
| H | 2.503651  | 0.618907  | 1.573820  |
| H | 3.451880  | 0.867042  | 3.069417  |
| H | 3.733234  | -0.567674 | 2.052201  |
| H | 6.734802  | 1.376330  | 1.161107  |
| H | 6.097965  | -0.071634 | 1.972476  |
| H | 6.022941  | 1.505218  | 2.793591  |
| H | 6.022827  | 3.103640  | -0.207423 |
| H | 6.077479  | 3.759182  | 1.452803  |
| H | 5.089743  | 4.561095  | 0.205272  |
| H | 3.979995  | 3.385773  | 3.010154  |
| H | 2.446124  | 2.944659  | 2.210463  |
| H | 3.247624  | 4.478536  | 1.812463  |
| C | 1.832627  | -2.292114 | -3.273286 |
| C | 2.218956  | -3.621015 | -3.402981 |
| C | 2.608859  | -1.344772 | -2.558104 |
| C | 3.417719  | -4.074268 | -2.841659 |
| C | 3.829072  | -1.821664 | -2.024252 |
| C | 4.217717  | -3.155120 | -2.162166 |
| C | 2.123946  | 0.040871  | -2.395812 |
| C | 3.200339  | 1.149368  | -2.324095 |
| H | 5.165580  | -3.481173 | -1.722739 |
| H | 4.464206  | -1.139977 | -1.455583 |
| H | 3.723201  | -5.118359 | -2.943247 |
| H | 1.579858  | -4.313549 | -3.959154 |
| H | 0.896967  | -1.956174 | -3.732589 |
| P | -0.040530 | -1.480133 | 0.748012  |
| C | 2.340305  | -2.819071 | 1.160925  |
| C | 3.234656  | -3.666792 | 1.815653  |
| C | 1.084673  | -2.553169 | 1.715836  |
| C | 2.881044  | -4.243801 | 3.034002  |
| C | 0.730310  | -3.143061 | 2.936364  |
| C | 1.628363  | -3.979966 | 3.594883  |
| C | -3.230509 | -4.091242 | 0.370436  |
| C | -2.351629 | -3.143682 | 0.889859  |
| C | -1.271725 | -2.689103 | 0.124605  |
| C | -3.034143 | -4.600817 | -0.914480 |
| C | -1.951175 | -4.164117 | -1.676128 |
| C | -1.074229 | -3.210202 | -1.159056 |
| C | -0.193481 | 0.166530  | 3.148956  |
| C | -0.910289 | -0.479402 | 1.975510  |
| C | -2.119161 | 0.114055  | 1.875886  |
| C | 0.121300  | 1.610961  | 2.662076  |
| C | -1.272797 | 2.265067  | 2.608355  |
| C | -2.230556 | 1.114254  | 3.044107  |
| C | -3.607606 | 1.602611  | 3.442853  |
| C | -1.368304 | 0.393655  | 4.135547  |
| C | -1.013249 | 1.263980  | 5.344632  |
| C | -1.977194 | -0.901343 | 4.679230  |
| C | -3.118088 | 0.075176  | 0.781772  |
| C | -4.387087 | -0.417540 | 0.961976  |
| C | -2.932429 | 0.675805  | -0.533307 |
| S | -5.368977 | -0.111131 | -0.426940 |
| C | -4.092031 | 0.683307  | -1.279892 |
| C | -4.953940 | -1.171714 | 2.122194  |
| C | -4.396454 | 1.247501  | -2.634406 |
| P | -1.276896 | 1.179375  | -1.138762 |
| C | -1.570423 | -0.693342 | -4.762413 |
| C | -1.663643 | -0.382528 | -3.408715 |
| C | -1.149514 | 0.274261  | -5.677008 |
| C | -1.350785 | 0.905061  | -2.950811 |
| C | -0.829450 | 1.553793  | -5.226003 |

|    |           |           |           |
|----|-----------|-----------|-----------|
| C  | -0.927086 | 1.869255  | -3.869739 |
| C  | 0.265262  | 4.911108  | -0.573769 |
| C  | 0.107453  | 3.540744  | -0.775486 |
| C  | -0.854249 | 5.740488  | -0.507511 |
| C  | -1.173053 | 2.991616  | -0.926823 |
| C  | -2.132712 | 5.197429  | -0.647525 |
| C  | -2.293318 | 3.828845  | -0.857057 |
| H  | 2.622164  | -2.354105 | 0.212253  |
| H  | 4.211534  | -3.868762 | 1.370185  |
| H  | 3.581757  | -4.902905 | 3.552189  |
| H  | -0.249774 | -2.942801 | 3.377436  |
| H  | 1.350172  | -4.433018 | 4.549306  |
| H  | -4.074464 | -4.435560 | 0.973065  |
| H  | -2.513995 | -2.744956 | 1.892950  |
| H  | -3.726881 | -5.342265 | -1.319716 |
| H  | -1.786396 | -4.564039 | -2.679446 |
| H  | -0.224359 | -2.870487 | -1.756978 |
| H  | 0.675891  | -0.378341 | 3.540927  |
| H  | 0.614394  | 1.597335  | 1.679657  |
| H  | 0.794220  | 2.124659  | 3.362714  |
| H  | -1.538298 | 2.642126  | 1.612850  |
| H  | -1.356257 | 3.115678  | 3.301124  |
| H  | -3.522776 | 2.374712  | 4.223575  |
| H  | -4.241413 | 0.797041  | 3.838649  |
| H  | -4.132176 | 2.055997  | 2.587306  |
| H  | -0.274626 | 0.744712  | 5.975836  |
| H  | -1.906476 | 1.439033  | 5.964891  |
| H  | -0.593798 | 2.244885  | 5.088436  |
| H  | -1.274218 | -1.387646 | 5.373931  |
| H  | -2.224495 | -1.626857 | 3.893975  |
| H  | -2.897963 | -0.689664 | 5.245889  |
| H  | -4.192219 | -1.303740 | 2.900611  |
| H  | -5.290909 | -2.173700 | 1.812144  |
| H  | -5.818461 | -0.656837 | 2.569195  |
| H  | -4.335147 | 0.477106  | -3.419259 |
| H  | -3.695084 | 2.047401  | -2.899379 |
| H  | -5.413456 | 1.666423  | -2.657410 |
| H  | -1.820222 | -1.701043 | -5.103387 |
| H  | -1.988026 | -1.149666 | -2.700287 |
| H  | -1.067345 | 0.029755  | -6.738480 |
| H  | -0.496762 | 2.316413  | -5.934019 |
| H  | -0.666038 | 2.875021  | -3.531731 |
| H  | 1.268455  | 5.327102  | -0.457802 |
| H  | 0.990418  | 2.895246  | -0.798303 |
| H  | -0.731427 | 6.813076  | -0.339681 |
| H  | -3.011542 | 5.843989  | -0.589983 |
| H  | -3.297630 | 3.408688  | -0.949907 |
| Cu | 0.753203  | -0.095427 | -0.892432 |
| H  | 2.765642  | 2.077342  | -2.733281 |
| H  | 4.067186  | 0.911852  | -2.977974 |
| H  | 1.456107  | 0.258092  | -3.247441 |

121

Figure 1\_L-Cu-alkyl\_major01\_02 / electronic energy: -4988.00658408 a.u. / lowest freq: 16.00 cm<sup>-1</sup>

|   |           |           |           |
|---|-----------|-----------|-----------|
| B | 3.725315  | 1.294016  | -1.152703 |
| O | 3.387250  | 2.561231  | -0.735471 |
| O | 4.545009  | 0.670078  | -0.242853 |
| C | 4.184217  | 2.881902  | 0.418729  |
| C | 4.558013  | 1.456280  | 0.962098  |
| C | 3.364298  | 3.735063  | 1.370252  |
| C | 5.398338  | 3.665403  | -0.077816 |
| C | 3.493395  | 0.869881  | 1.887564  |
| C | 5.928972  | 1.358819  | 1.610262  |
| H | 2.501533  | 0.899231  | 1.413439  |
| H | 3.442451  | 1.404918  | 2.846761  |
| H | 3.732685  | -0.183324 | 2.092481  |
| H | 6.731869  | 1.619201  | 0.908358  |
| H | 6.103278  | 0.329826  | 1.958011  |
| H | 5.993252  | 2.026751  | 2.482601  |
| H | 6.021225  | 3.060304  | -0.753373 |
| H | 6.024701  | 4.012150  | 0.756831  |
| H | 5.050793  | 4.547421  | -0.635683 |
| H | 3.897248  | 3.881217  | 2.321986  |
| H | 2.391733  | 3.275972  | 1.578251  |
| H | 3.184457  | 4.725873  | 0.927082  |
| C | 1.860479  | -2.879796 | -2.781317 |
| C | 2.242878  | -4.209500 | -2.641740 |
| C | 2.618497  | -1.813189 | -2.235476 |
| C | 3.421546  | -4.546092 | -1.968217 |
| C | 3.821689  | -2.178707 | -1.586694 |
| C | 4.207591  | -3.513047 | -1.455720 |
| C | 2.136159  | -0.421329 | -2.348765 |
| C | 3.216952  | 0.676287  | -2.498263 |
| H | 5.141948  | -3.747497 | -0.936283 |
| H | 4.444921  | -1.399321 | -1.144116 |
| H | 3.723417  | -5.590209 | -1.856501 |
| H | 1.615218  | -4.996175 | -3.071358 |
| H | 0.940549  | -2.639294 | -3.324482 |
| P | -0.025541 | -1.287471 | 1.042785  |
| C | 2.287606  | -2.627549 | 1.735318  |
| C | 3.140644  | -3.368364 | 2.553927  |
| C | 1.053384  | -2.182790 | 2.220983  |
| C | 2.769893  | -3.656899 | 3.866564  |
| C | 0.681582  | -2.483529 | 3.537716  |
| C | 1.540434  | -3.211392 | 4.358530  |
| C | -3.207731 | -3.937918 | 0.994736  |
| C | -2.341917 | -2.920166 | 1.388375  |
| C | -1.242512 | -2.583537 | 0.590591  |

|    |           |           |           |
|----|-----------|-----------|-----------|
| C  | -2.979143 | -4.635140 | -0.193461 |
| C  | -1.875802 | -4.316568 | -0.983433 |
| C  | -1.012306 | -3.293157 | -0.592630 |
| C  | -0.234335 | 0.776012  | 3.083963  |
| C  | -0.928727 | -0.084590 | 2.041457  |
| C  | -2.136818 | 0.472085  | 1.808050  |
| C  | 0.090402  | 2.100222  | 2.334941  |
| C  | -1.302349 | 2.726519  | 2.130339  |
| C  | -2.269348 | 1.678018  | 2.761096  |
| C  | -3.652486 | 2.232329  | 3.033086  |
| C  | -1.427700 | 1.183014  | 3.986074  |
| C  | -1.096405 | 2.270501  | 5.012319  |
| C  | -2.047793 | 0.013648  | 4.755466  |
| C  | -3.121039 | 0.212930  | 0.730073  |
| C  | -4.390225 | -0.241215 | 0.992324  |
| C  | -2.922436 | 0.533799  | -0.678527 |
| S  | -5.356929 | -0.231191 | -0.439288 |
| C  | -4.074368 | 0.385652  | -1.422102 |
| C  | -4.964792 | -0.756175 | 2.273393  |
| C  | -4.372014 | 0.676907  | -2.861798 |
| P  | -1.260990 | 0.907931  | -1.356513 |
| C  | -1.520159 | -1.541368 | -4.621843 |
| C  | -1.622250 | -1.013125 | -3.338003 |
| C  | -1.104686 | -0.732894 | -5.682012 |
| C  | -1.323424 | 0.334964  | -3.097047 |
| C  | -0.799281 | 0.606465  | -5.446790 |
| C  | -0.905854 | 1.139649  | -4.161033 |
| C  | 0.308616  | 4.670035  | -1.383130 |
| C  | 0.140910  | 3.286342  | -1.368543 |
| C  | -0.804349 | 5.506405  | -1.470385 |
| C  | -1.141806 | 2.728613  | -1.452212 |
| C  | -2.085234 | 4.956226  | -1.549333 |
| C  | -2.255277 | 3.572854  | -1.541199 |
| H  | 2.583773  | -2.389968 | 0.709434  |
| H  | 4.099217  | -3.716196 | 2.161638  |
| H  | 3.438828  | -4.232406 | 4.510940  |
| H  | -0.281562 | -2.143165 | 3.926359  |
| H  | 1.248626  | -3.436662 | 5.387075  |
| H  | -4.067657 | -4.190346 | 1.619911  |
| H  | -2.529208 | -2.377667 | 2.317570  |
| H  | -3.663045 | -5.429894 | -0.500724 |
| H  | -1.684901 | -4.860569 | -1.911591 |
| H  | -0.147671 | -3.044348 | -1.212879 |
| H  | 0.626890  | 0.318449  | 3.588924  |
| H  | 0.602068  | 1.898327  | 1.383070  |
| H  | 0.750006  | 2.741952  | 2.935749  |
| H  | -1.547702 | 2.902328  | 1.075845  |
| H  | -1.400401 | 3.694280  | 2.644174  |
| H  | -3.578940 | 3.148521  | 3.639404  |
| H  | -4.290424 | 1.523286  | 3.578657  |
| H  | -4.166114 | 2.498033  | 2.095953  |
| H  | -0.366647 | 1.886458  | 5.742966  |
| H  | -2.000466 | 2.554719  | 5.573863  |
| H  | -0.675976 | 3.187777  | 4.581408  |
| H  | -1.358314 | -0.330348 | 5.542664  |
| H  | -2.280099 | -0.848076 | 4.116508  |
| H  | -2.978644 | 0.327068  | 5.254416  |
| H  | -4.214446 | -0.714651 | 3.072111  |
| H  | -5.279960 | -1.806354 | 2.166754  |
| H  | -5.844842 | -0.178415 | 2.595839  |
| H  | -4.278763 | -0.223235 | -3.489525 |
| H  | -3.686985 | 1.432781  | -3.264118 |
| H  | -5.398376 | 1.057412  | -2.972478 |
| H  | -1.758141 | -2.593914 | -4.793574 |
| H  | -1.941966 | -1.656873 | -2.514105 |
| H  | -1.015435 | -1.148819 | -6.688152 |
| H  | -0.471753 | 1.246567  | -6.269407 |
| H  | -0.657810 | 2.190178  | -3.992550 |
| H  | 1.314207  | 5.090524  | -1.312797 |
| H  | 1.017906  | 2.639891  | -1.272878 |
| H  | -0.674898 | 6.591316  | -1.471049 |
| H  | -2.958378 | 5.609961  | -1.611872 |
| H  | -3.261529 | 3.148783  | -1.584431 |
| Cu | 0.779464  | -0.252362 | -0.834516 |
| H  | 2.783180  | 1.507020  | -3.080660 |
| H  | 4.081035  | 0.311153  | -3.093557 |
| H  | 1.470188  | -0.374534 | -3.227731 |

121

Figure 1\_L-Cu-alkyl\_major01\_03 / electronic energy: -4988.00414970 a.u. / lowest freq: 20.39 cm-1

|   |           |           |           |
|---|-----------|-----------|-----------|
| P | 0.474095  | -1.054978 | 1.076352  |
| C | 0.266777  | 1.237146  | 2.620360  |
| C | 0.095959  | 1.979123  | 3.788786  |
| C | 0.359063  | -0.157304 | 2.667348  |
| C | 0.022404  | 1.329566  | 5.019017  |
| C | 0.287998  | -0.802615 | 3.910148  |
| C | 0.122900  | -0.062300 | 5.078091  |
| C | 2.755393  | -4.388217 | 0.458398  |
| C | 1.764308  | -3.412766 | 0.395039  |
| C | 1.727641  | -2.370819 | 1.331847  |
| C | 3.735448  | -4.325039 | 1.449993  |
| C | 3.718284  | -3.280297 | 2.372213  |
| C | 2.720590  | -2.306063 | 2.314759  |
| C | -1.737859 | -2.787529 | 2.056227  |
| C | -1.091428 | -1.949246 | 0.967531  |
| C | -1.980668 | -1.837462 | -0.039338 |
| C | -2.819519 | -1.855525 | 2.673476  |
| C | -3.844417 | -1.736306 | 1.525444  |

|   |           |           |           |
|---|-----------|-----------|-----------|
| C | -3.237057 | -2.614703 | 0.382907  |
| C | -4.237438 | -2.965319 | -0.698476 |
| C | -2.590878 | -3.777439 | 1.213653  |
| C | -3.585200 | -4.605144 | 2.033372  |
| C | -1.759157 | -4.762702 | 0.390793  |
| C | -1.871643 | -1.052092 | -1.290703 |
| C | -1.578282 | -1.647005 | -2.494892 |
| C | -2.101849 | 0.376004  | -1.408126 |
| S | -1.604887 | -0.480972 | -3.767346 |
| C | -1.997603 | 0.823778  | -2.708519 |
| C | -1.220238 | -3.073358 | -2.779228 |
| C | -2.163695 | 2.196894  | -3.282642 |
| P | -2.471285 | 1.370609  | 0.084638  |
| C | -2.027456 | 5.462322  | -0.477055 |
| C | -2.600099 | 4.204943  | -0.280715 |
| C | -0.655759 | 5.587036  | -0.691988 |
| C | -1.809242 | 3.048766  | -0.299719 |
| C | 0.143430  | 4.443132  | -0.707619 |
| C | -0.428865 | 3.188640  | -0.507499 |
| C | -6.319071 | 2.280781  | 1.151416  |
| C | -4.937796 | 2.097769  | 1.132370  |
| C | -7.081272 | 1.958129  | 0.027617  |
| C | -4.294379 | 1.613563  | -0.016919 |
| C | -6.454164 | 1.456379  | -1.112167 |
| C | -5.068942 | 1.287603  | -1.136340 |
| H | 0.329454  | 1.750004  | 1.659142  |
| H | 0.022125  | 3.067433  | 3.731034  |
| H | -0.111743 | 1.905830  | 5.937478  |
| H | 0.361613  | -1.890483 | 3.971583  |
| H | 0.067472  | -0.575111 | 6.040960  |
| H | 2.769015  | -5.192340 | -0.280070 |
| H | 1.019200  | -3.450624 | -0.403371 |
| H | 4.517394  | -5.086404 | 1.496967  |
| H | 4.487894  | -3.218365 | 3.145172  |
| H | 2.727500  | -1.491256 | 3.041102  |
| H | -1.047286 | -3.243658 | 2.778805  |
| H | -2.392916 | -0.885057 | 2.961017  |
| H | -3.258208 | -2.301482 | 3.577721  |
| H | -3.996292 | -0.702859 | 1.190881  |
| H | -4.833236 | -2.127123 | 1.807687  |
| H | -5.104557 | -3.485350 | -0.262609 |
| H | -3.809119 | -3.618553 | -1.472217 |
| H | -4.612619 | -2.056803 | -1.195142 |
| H | -3.037919 | -5.288489 | 2.702359  |
| H | -4.204796 | -5.227315 | 1.368389  |
| H | -4.266020 | -4.011311 | 2.655863  |
| H | -1.214896 | -5.449607 | 1.058299  |
| H | -1.021256 | -4.270355 | -0.251302 |
| H | -2.409720 | -5.378043 | -0.251148 |
| H | -0.281627 | -3.347577 | -2.274214 |
| H | -1.078848 | -3.247625 | -3.854940 |
| H | -1.999929 | -3.763825 | -2.428718 |
| H | -1.248670 | 2.795162  | -3.148994 |
| H | -2.985914 | 2.733022  | -2.790205 |
| H | -2.381630 | 2.150513  | -4.359295 |
| H | -2.664161 | 6.350611  | -0.464764 |
| H | -3.678369 | 4.131675  | -0.124036 |
| H | -0.208879 | 6.572286  | -0.845455 |
| H | 1.221998  | 4.505770  | -0.863454 |
| H | 0.220236  | 2.306101  | -0.541852 |
| H | -6.803220 | 2.667045  | 2.051464  |
| H | -4.349756 | 2.332217  | 2.025007  |
| H | -8.165462 | 2.092513  | 0.043691  |
| H | -7.045379 | 1.195260  | -1.993326 |
| H | -4.589953 | 0.891330  | -2.034602 |
| H | 4.345582  | -4.550916 | -2.927285 |
| H | 5.548570  | -2.722389 | -1.720635 |
| C | 3.905068  | -3.554078 | -2.848399 |
| C | 4.573869  | -2.528037 | -2.178047 |
| H | 2.120229  | -4.053058 | -3.965083 |
| C | 2.662012  | -3.272775 | -3.421808 |
| H | 6.591037  | 1.127285  | 1.365277  |
| C | 4.018900  | -1.253760 | -2.073596 |
| H | 4.445738  | -0.047891 | 1.503094  |
| H | 4.559794  | -0.479642 | -1.525739 |
| C | 2.107293  | -2.000726 | -3.319956 |
| C | 2.755414  | -0.947975 | -2.631188 |
| C | 6.118040  | 2.119050  | 1.311990  |
| C | 3.947071  | 0.921852  | 1.642708  |
| H | 6.718521  | 2.745993  | 0.639770  |
| O | 4.682223  | 1.528209  | -0.538683 |
| H | 1.139547  | -1.798529 | -3.787244 |
| H | 3.938057  | 1.157475  | 2.716764  |
| H | 6.143328  | 2.560782  | 2.319616  |
| C | 4.685375  | 1.981334  | 0.826932  |
| C | 2.096012  | 0.375179  | -2.488358 |
| B | 3.585290  | 2.072965  | -1.162490 |
| H | 3.833756  | 1.483324  | -3.280715 |
| C | 3.010801  | 1.625262  | -2.549785 |
| C | 3.891884  | 3.330967  | 0.718529  |
| H | 5.411209  | 4.281590  | -0.531410 |
| O | 3.026014  | 3.073728  | -0.401035 |
| H | 5.431910  | 4.814802  | 1.172487  |
| H | 3.687489  | 3.774259  | 2.829809  |
| C | 4.780077  | 4.514756  | 0.339248  |
| H | 2.407198  | 2.466711  | -2.930141 |
| C | 3.052209  | 3.674333  | 1.936646  |

|    |          |           |           |
|----|----------|-----------|-----------|
| H  | 4.143189 | 5.372688  | 0.077227  |
| H  | 2.533682 | 4.631871  | 1.779517  |
| Cu | 1.124009 | -0.000889 | -0.788641 |
| H  | 1.323502 | 0.456759  | -3.271937 |
| H  | 2.906617 | 0.815735  | 1.299242  |
| H  | 2.295495 | 2.906338  | 2.133294  |

121

Figure 1\_pcl\_major02\_01 / electronic energy: -4987.94730466 a.u. / lowest freq: 7.19 cm<sup>-1</sup>

|   |           |           |           |
|---|-----------|-----------|-----------|
| B | -0.026408 | 2.452894  | -0.023464 |
| O | -0.790343 | 3.392663  | -0.704117 |
| O | 0.062454  | 2.843092  | 1.312386  |
| C | -1.024880 | 4.535797  | 0.124512  |
| C | -0.799358 | 3.960743  | 1.567737  |
| C | -2.426208 | 5.069371  | -0.134929 |
| C | 0.012668  | 5.588941  | -0.270081 |
| C | -2.079558 | 3.430179  | 2.212186  |
| C | -0.099593 | 4.910170  | 2.531277  |
| H | -2.626713 | 2.764284  | 1.531412  |
| H | -2.750017 | 4.247308  | 2.517667  |
| H | -1.816087 | 2.847521  | 3.108066  |
| H | 0.906665  | 5.175981  | 2.180771  |
| H | 0.004558  | 4.431167  | 3.516793  |
| H | -0.680088 | 5.836055  | 2.664274  |
| H | 1.035986  | 5.232020  | -0.080571 |
| H | -0.132352 | 6.537175  | 0.268577  |
| H | -0.078683 | 5.789991  | -1.347971 |
| H | -3.184569 | 4.282606  | -0.030377 |
| H | -2.492757 | 5.465246  | -1.159492 |
| H | -2.668734 | 5.888111  | 0.560363  |
| C | 5.033581  | 0.705713  | -2.283110 |
| C | 6.278125  | 0.894080  | -1.685829 |
| C | 3.915042  | 1.458911  | -1.888033 |
| C | 6.439060  | 1.846375  | -0.678938 |
| C | 4.094483  | 2.414382  | -0.869616 |
| C | 5.339218  | 2.605438  | -0.276757 |
| C | 2.599192  | 1.233681  | -2.520253 |
| C | 1.579173  | 2.172139  | -2.509145 |
| H | 5.446942  | 3.348440  | 0.517007  |
| H | 3.243309  | 3.003603  | -0.520489 |
| H | 7.413215  | 1.992295  | -0.206374 |
| H | 7.130291  | 0.292815  | -2.012835 |
| H | 4.925688  | -0.037139 | -3.078231 |
| P | -2.596111 | 0.276766  | 0.201257  |
| C | -3.060541 | 1.900391  | -2.066321 |
| C | -3.759087 | 2.840551  | -2.820499 |
| C | -3.592024 | 1.396008  | -0.870264 |
| C | -4.992158 | 3.322289  | -2.381007 |
| C | -4.824860 | 1.902162  | -0.430541 |
| C | -5.517850 | 2.855264  | -1.177428 |
| C | -5.960156 | -1.918234 | 1.289192  |
| C | -5.029440 | -1.219319 | 0.524083  |
| C | -3.918296 | -0.613998 | 1.131082  |
| C | -5.790586 | -2.024840 | 2.672449  |
| C | -4.694364 | -1.422148 | 3.286244  |
| C | -3.766560 | -0.715493 | 2.517942  |
| C | -2.231438 | -1.215271 | -2.423379 |
| C | -2.003847 | -1.035043 | -0.930396 |
| C | -1.157920 | -2.012630 | -0.538905 |
| C | -0.889991 | -0.811139 | -3.096328 |
| C | 0.057084  | -1.951324 | -2.665796 |
| C | -0.841011 | -2.868118 | -1.777360 |
| C | -0.267659 | -4.247178 | -1.527294 |
| C | -2.202504 | -2.764203 | -2.554194 |
| C | -2.155462 | -3.270897 | -4.000204 |
| C | -3.385912 | -3.458526 | -1.881351 |
| C | -0.651795 | -2.236541 | 0.843952  |
| C | -1.343765 | -3.032539 | 1.728653  |
| C | 0.540981  | -1.654853 | 1.443959  |
| S | -0.594539 | -3.023045 | 3.279555  |
| C | 0.693038  | -1.992870 | 2.772574  |
| C | -2.584048 | -3.844725 | 1.521419  |
| C | 1.757684  | -1.674871 | 3.781219  |
| P | 1.784263  | -0.814619 | 0.396291  |
| C | 3.485968  | 1.830852  | 3.023256  |
| C | 2.585154  | 1.146985  | 2.209868  |
| C | 4.808168  | 1.397591  | 3.131513  |
| C | 2.995612  | 0.004088  | 1.508496  |
| C | 5.227146  | 0.280095  | 2.411969  |
| C | 4.327817  | -0.412709 | 1.601466  |
| C | 4.090781  | -3.277681 | -1.958268 |
| C | 3.356481  | -2.202630 | -1.460512 |
| C | 4.194570  | -4.452257 | -1.214929 |
| C | 2.722797  | -2.280862 | -0.217422 |
| C | 3.563670  | -4.543248 | 0.026498  |
| C | 2.831375  | -3.465831 | 0.522191  |
| H | -2.078760 | 1.572237  | -2.407177 |
| H | -3.325188 | 3.212550  | -3.751890 |
| H | -5.536421 | 4.064605  | -2.969768 |
| H | -5.258169 | 1.552595  | 0.509140  |
| H | -6.476525 | 3.232515  | -0.812642 |
| H | -6.820418 | -2.387252 | 0.805520  |
| H | -5.168358 | -1.139249 | -0.557039 |
| H | -6.517263 | -2.579547 | 3.271021  |
| H | -4.556199 | -1.503302 | 4.367017  |
| H | -2.902032 | -0.249771 | 2.998774  |
| H | -3.118998 | -0.716807 | -2.834618 |
| H | -0.539589 | 0.164444  | -2.730732 |



|    |           |           |           |
|----|-----------|-----------|-----------|
| H  | -0.994484 | -0.738292 | -4.188574 |
| H  | 0.919393  | -1.580287 | -2.105135 |
| H  | 0.453063  | -2.516405 | -3.522792 |
| H  | -0.120348 | -4.784572 | -2.477311 |
| H  | -0.926422 | -4.857146 | -0.890339 |
| H  | 0.711220  | -4.182332 | -1.028885 |
| H  | -3.074662 | -2.971753 | -4.529166 |
| H  | -2.114465 | -4.371695 | -4.019191 |
| H  | -1.304818 | -2.901258 | -4.586048 |
| H  | -4.303864 | -3.296325 | -2.468741 |
| H  | -3.572244 | -3.093343 | -0.867045 |
| H  | -3.221352 | -4.546839 | -1.828577 |
| H  | -3.438138 | -3.210862 | 1.249412  |
| H  | -2.856113 | -4.394226 | 2.433546  |
| H  | -2.443368 | -4.581264 | 0.716866  |
| H  | 1.595517  | -2.246295 | 4.706254  |
| H  | 1.760697  | -0.607399 | 4.043626  |
| H  | 2.759070  | -1.923203 | 3.404213  |
| H  | 3.150464  | 2.715839  | 3.569659  |
| H  | 1.560380  | 1.516697  | 2.118815  |
| H  | 5.513680  | 1.938529  | 3.766793  |
| H  | 6.264424  | -0.056962 | 2.475676  |
| H  | 4.675339  | -1.285618 | 1.045985  |
| H  | 4.577450  | -3.196996 | -2.932980 |
| H  | 3.265864  | -1.289493 | -2.046662 |
| H  | 4.762638  | -5.300369 | -1.604339 |
| H  | 3.635876  | -5.463241 | 0.611200  |
| H  | 2.329925  | -3.559654 | 1.487504  |
| Cu | 1.132827  | 0.987507  | -0.902084 |
| H  | 1.740272  | 3.190720  | -2.148776 |
| H  | 0.720440  | 2.051325  | -3.175322 |
| H  | 2.521347  | 0.377226  | -3.198241 |

121

Figure 1\_pcl\_major02\_02 / electronic energy: -4987.94730699 a.u. / lowest freq: 9.81 cm<sup>-1</sup>

|   |           |           |           |
|---|-----------|-----------|-----------|
| B | -0.026560 | -2.453708 | 0.025569  |
| O | -0.793185 | -3.391851 | 0.705423  |
| O | 0.065185  | -2.845560 | -1.309595 |
| C | -1.026519 | -4.535821 | -0.122458 |
| C | -0.797238 | -3.962566 | -1.565753 |
| C | -2.428741 | -5.068431 | 0.134119  |
| C | 0.009505  | -5.589084 | 0.275784  |
| C | -2.075399 | -3.431227 | -2.213590 |
| C | -0.096363 | -4.913750 | -2.526734 |
| H | -2.623168 | -2.763769 | -1.534826 |
| H | -2.746221 | -4.247886 | -2.519533 |
| H | -1.809297 | -2.849974 | -3.109609 |
| H | 0.908706  | -5.180544 | -2.173562 |
| H | 0.010682  | -4.435813 | -3.512458 |
| H | -0.677729 | -5.839020 | -2.660210 |
| H | 1.033464  | -5.232997 | 0.088163  |
| H | -0.134853 | -6.537884 | -0.262060 |
| H | -0.084436 | -5.788796 | 1.353695  |
| H | -3.186479 | -4.281369 | 0.027329  |
| H | -2.497946 | -5.463648 | 1.158761  |
| H | -2.670038 | -5.887464 | -0.561259 |
| C | 5.035178  | -0.706976 | 2.280302  |
| C | 6.278872  | -0.894334 | 1.680947  |
| C | 3.916322  | -1.460271 | 1.886277  |
| C | 6.438641  | -1.845647 | 0.672937  |
| C | 4.094667  | -2.414958 | 0.866930  |
| C | 5.338525  | -2.604909 | 0.271887  |
| C | 2.601142  | -1.235655 | 2.520138  |
| C | 1.581102  | -2.174146 | 2.509416  |
| H | 5.445316  | -3.347198 | -0.522672 |
| H | 3.243208  | -3.004278 | 0.518660  |
| H | 7.412114  | -1.990709 | 0.198713  |
| H | 7.131288  | -0.292975 | 2.007131  |
| H | 4.928218  | 0.035285  | 3.076095  |
| P | -2.595931 | -0.276504 | -0.203619 |
| C | -3.064023 | -1.900920 | 2.062578  |
| C | -3.764010 | -2.840819 | 2.815708  |
| C | -3.593765 | -1.395887 | 0.866029  |
| C | -4.996794 | -3.321776 | 2.374571  |
| C | -4.826322 | -1.901262 | 0.424634  |
| C | -5.520732 | -2.854195 | 1.170438  |
| C | -5.957686 | 1.920993  | -1.293393 |
| C | -5.028120 | 1.220962  | -0.527912 |
| C | -3.916573 | 0.615717  | -1.134252 |
| C | -5.786521 | 2.028858  | -2.676355 |
| C | -4.689876 | 1.426274  | -3.289503 |
| C | -3.763260 | 0.718440  | -2.520844 |
| C | -2.233005 | 1.212883  | 2.422801  |
| C | -2.004462 | 1.034214  | 0.929783  |
| C | -1.158295 | 2.012232  | 0.539907  |
| C | -0.891983 | 0.807999  | 3.096209  |
| C | 0.055376  | 1.948673  | 2.667539  |
| C | -0.842145 | 2.866416  | 1.779490  |
| C | -0.268653 | 4.245758  | 1.531331  |
| C | -2.204129 | 2.761657  | 2.555289  |
| C | -2.158089 | 3.266661  | 4.001923  |
| C | -3.387029 | 3.456811  | 1.882408  |
| C | -0.651195 | 2.237149  | -0.842409 |
| C | -1.341949 | 3.034328  | -1.726997 |
| C | 0.541185  | 1.654588  | -1.442197 |
| S | -0.592111 | 3.024724  | -3.277639 |
| C | 0.694074  | 1.992861  | -2.770633 |
| C | -2.581886 | 3.847083  | -1.519983 |

|    |           |           |           |
|----|-----------|-----------|-----------|
| C  | 1.759875  | 1.675040  | -3.778108 |
| P  | 1.784181  | 0.813924  | -0.394631 |
| C  | 5.226325  | -0.273235 | -2.415797 |
| C  | 4.326764  | 0.417568  | -1.603853 |
| C  | 4.808945  | -1.392344 | -3.133754 |
| C  | 2.995914  | -0.002747 | -1.507917 |
| C  | 3.488221  | -1.829278 | -3.022342 |
| C  | 2.587209  | -1.147379 | -2.207519 |
| C  | 3.560428  | 4.543726  | -0.020639 |
| C  | 2.829029  | 3.466270  | -0.517580 |
| C  | 4.191578  | 4.451762  | 1.220588  |
| C  | 2.721671  | 2.280257  | 0.220542  |
| C  | 4.088938  | 3.276171  | 1.962481  |
| C  | 3.355576  | 2.201077  | 1.463455  |
| H  | -2.082461 | -1.573516 | 2.404697  |
| H  | -3.331425 | -3.213289 | 3.747521  |
| H  | -5.542200 | -4.063931 | 2.962478  |
| H  | -5.258306 | -1.551183 | -0.515470 |
| H  | -6.479148 | -3.230866 | 0.804374  |
| H  | -6.818271 | 2.389934  | -0.810219 |
| H  | -5.168226 | 1.139968  | 0.552988  |
| H  | -6.512259 | 2.584487  | -3.275210 |
| H  | -4.550475 | 1.508409  | -4.370042 |
| H  | -2.898448 | 0.252722  | -3.001178 |
| H  | -3.120849 | 0.714087  | 2.832989  |
| H  | -0.541281 | -0.167217 | 2.729877  |
| H  | -0.997217 | 0.734025  | 4.188307  |
| H  | 0.918132  | 1.578305  | 2.107097  |
| H  | 0.450706  | 2.512838  | 3.525441  |
| H  | -0.121927 | 4.782067  | 2.482051  |
| H  | -0.927044 | 4.856456  | 0.894693  |
| H  | 0.710507  | 4.181484  | 1.033421  |
| H  | -3.077746 | 2.967052  | 4.529821  |
| H  | -2.116859 | 4.367426  | 4.022284  |
| H  | -1.307964 | 2.896108  | 4.587944  |
| H  | -4.305543 | 3.293442  | 2.468605  |
| H  | -3.572254 | 3.093381  | 0.867267  |
| H  | -3.222643 | 4.545248  | 1.831688  |
| H  | -2.852921 | 4.397611  | -2.431796 |
| H  | -2.441422 | 4.582779  | -0.714630 |
| H  | -3.436535 | 3.213427  | -1.249215 |
| H  | 1.590714  | 2.235255  | -4.708727 |
| H  | 1.773716  | 0.604909  | -4.028576 |
| H  | 2.759374  | 1.937214  | -3.405017 |
| H  | 6.262490  | 0.066759  | -2.481980 |
| H  | 4.672973  | 1.291814  | -1.049658 |
| H  | 5.514619  | -1.931684 | -3.770210 |
| H  | 3.154049  | -2.715573 | -3.567435 |
| H  | 1.563597  | -1.519803 | -2.114278 |
| H  | 3.631690  | 5.464528  | -0.604181 |
| H  | 2.327293  | 3.560869  | -1.482664 |
| H  | 4.758880  | 5.299922  | 1.611008  |
| H  | 4.575742  | 3.194729  | 2.937063  |
| H  | 3.265734  | 1.287166  | 2.048507  |
| Cu | 1.133322  | -0.988628 | 0.903450  |
| H  | 1.741981  | -3.192555 | 2.148432  |
| H  | 0.723154  | -2.053734 | 3.176681  |
| H  | 2.523905  | -0.379728 | 3.198857  |

121

Figure 1\_pcl\_major02\_03 / electronic energy: -4987.95173049 a.u. / lowest freq: 15.25 cm-1

|   |           |           |           |
|---|-----------|-----------|-----------|
| B | -2.770952 | 0.046218  | 0.622504  |
| O | -3.450149 | 1.075955  | 1.264194  |
| O | -3.638723 | -0.563314 | -0.280078 |
| C | -4.848671 | 1.007707  | 0.959103  |
| C | -4.861928 | 0.179969  | -0.374945 |
| C | -5.401764 | 2.420210  | 0.837089  |
| C | -5.525991 | 0.279627  | 2.120909  |
| C | -4.774860 | 1.052510  | -1.626911 |
| C | -6.020239 | -0.797912 | -0.514245 |
| H | -3.954371 | 1.779267  | -1.554542 |
| H | -5.710928 | 1.602129  | -1.804729 |
| H | -4.583421 | 0.412471  | -2.500526 |
| H | -6.018432 | -1.547206 | 0.288151  |
| H | -5.939929 | -1.331762 | -1.473337 |
| H | -6.986023 | -0.269692 | -0.500404 |
| H | -5.133918 | -0.742527 | 2.232407  |
| H | -6.617283 | 0.224591  | 1.994206  |
| H | -5.315880 | 0.822400  | 3.054586  |
| H | -4.821651 | 3.020302  | 0.123386  |
| H | -5.351673 | 2.923407  | 1.814416  |
| H | -6.454529 | 2.406458  | 0.514983  |
| C | 1.829726  | -2.523224 | 3.551117  |
| C | 2.633081  | -3.662052 | 3.504860  |
| C | 0.540635  | -2.515203 | 2.988541  |
| C | 2.170454  | -4.826023 | 2.890077  |
| C | 0.085669  | -3.701455 | 2.383502  |
| C | 0.890094  | -4.835474 | 2.330625  |
| C | -0.272157 | -1.289167 | 3.066677  |
| C | -1.643972 | -1.218688 | 2.859723  |
| H | 0.513292  | -5.736528 | 1.840026  |
| H | -0.903453 | -3.732341 | 1.923472  |
| H | 2.800374  | -5.717458 | 2.845206  |
| H | 3.630357  | -3.637228 | 3.951549  |
| H | 2.204234  | -1.615024 | 4.031450  |
| P | 0.396724  | 1.529560  | 0.986830  |
| C | 0.035633  | 2.769161  | 3.476644  |
| C | 0.311516  | 2.980245  | 4.827398  |

|    |           |           |           |
|----|-----------|-----------|-----------|
| C  | 0.898661  | 2.000818  | 2.682709  |
| C  | 1.448306  | 2.420603  | 5.409449  |
| C  | 2.022235  | 1.417129  | 3.285598  |
| C  | 2.300096  | 1.633950  | 4.633754  |
| C  | -0.568844 | 5.438047  | 0.002065  |
| C  | 0.015439  | 4.334169  | 0.619897  |
| C  | -0.415361 | 3.036799  | 0.309606  |
| C  | -1.578795 | 5.257454  | -0.944973 |
| C  | -2.001619 | 3.969195  | -1.269360 |
| C  | -1.425177 | 2.865402  | -0.641128 |
| C  | 3.314499  | 1.925621  | 0.362214  |
| C  | 1.900145  | 1.539150  | -0.039737 |
| C  | 1.910865  | 1.222992  | -1.355765 |
| C  | 4.120216  | 0.600355  | 0.355961  |
| C  | 4.168067  | 0.262478  | -1.146826 |
| C  | 3.372128  | 1.419946  | -1.830633 |
| C  | 3.639507  | 1.501183  | -3.320326 |
| C  | 3.815105  | 2.628674  | -0.928195 |
| C  | 5.320323  | 2.918649  | -0.953203 |
| C  | 3.110918  | 3.962213  | -1.178315 |
| C  | 0.748220  | 0.823519  | -2.210655 |
| C  | 0.279148  | 1.665835  | -3.197311 |
| C  | -0.073420 | -0.389763 | -2.101969 |
| S  | -1.107651 | 1.007383  | -3.980382 |
| C  | -1.116003 | -0.413016 | -3.000076 |
| C  | 0.705704  | 3.042053  | -3.599321 |
| C  | -2.234322 | -1.388117 | -3.227823 |
| P  | 0.153217  | -1.602808 | -0.738904 |
| C  | -2.850175 | -4.417143 | -0.714971 |
| C  | -2.067056 | -3.286578 | -0.487912 |
| C  | -2.407072 | -5.414146 | -1.582433 |
| C  | -0.835780 | -3.122163 | -1.134333 |
| C  | -1.171555 | -5.273271 | -2.214252 |
| C  | -0.391404 | -4.140335 | -1.988239 |
| C  | 3.859708  | -3.296736 | -0.261657 |
| C  | 2.617446  | -2.706839 | -0.027055 |
| C  | 4.329884  | -3.442269 | -1.565989 |
| C  | 1.835264  | -2.253183 | -1.092077 |
| C  | 3.558384  | -2.986075 | -2.637039 |
| C  | 2.321804  | -2.389182 | -2.401011 |
| H  | -0.867609 | 3.203240  | 3.040940  |
| H  | -0.370805 | 3.585687  | 5.428688  |
| H  | 1.663773  | 2.587707  | 6.467256  |
| H  | 2.677676  | 0.763282  | 2.708426  |
| H  | 3.184485  | 1.175082  | 5.082205  |
| H  | -0.229102 | 6.444851  | 0.256439  |
| H  | 0.814977  | 4.487948  | 1.348800  |
| H  | -2.034337 | 6.123648  | -1.430922 |
| H  | -2.784019 | 3.818918  | -2.017439 |
| H  | -1.752712 | 1.855224  | -0.896494 |
| H  | 3.400513  | 2.517222  | 1.282638  |
| H  | 3.617928  | -0.182957 | 0.941768  |
| H  | 5.122547  | 0.742164  | 0.786253  |
| H  | 3.719054  | -0.702220 | -1.378943 |
| H  | 5.197580  | 0.237227  | -1.532301 |
| H  | 4.724205  | 1.502619  | -3.509677 |
| H  | 3.223999  | 2.407605  | -3.779605 |
| H  | 3.215175  | 0.630811  | -3.845110 |
| H  | 5.579460  | 3.624180  | -0.147655 |
| H  | 5.596422  | 3.398911  | -1.905600 |
| H  | 5.959281  | 2.035227  | -0.834117 |
| H  | 3.461877  | 4.708015  | -0.447272 |
| H  | 2.021212  | 3.899012  | -1.077399 |
| H  | 3.348616  | 4.355434  | -2.179595 |
| H  | 1.474443  | 3.427725  | -2.927227 |
| H  | -0.145110 | 3.739860  | -3.553882 |
| H  | 1.100119  | 3.066668  | -4.627417 |
| H  | -2.866447 | -1.055778 | -4.064202 |
| H  | -2.864915 | -1.456241 | -2.329399 |
| H  | -1.864493 | -2.392821 | -3.471919 |
| H  | -3.812924 | -4.516554 | -0.207761 |
| H  | -2.428522 | -2.502483 | 0.177409  |
| H  | -3.017269 | -6.302845 | -1.761018 |
| H  | -0.808179 | -6.051284 | -2.889925 |
| H  | 0.570828  | -4.062153 | -2.494182 |
| H  | 4.460529  | -3.642234 | 0.582987  |
| H  | 2.257766  | -2.591691 | 0.996016  |
| H  | 5.301559  | -3.906935 | -1.749510 |
| H  | 3.926123  | -3.088044 | -3.660755 |
| H  | 1.728968  | -2.022399 | -3.242969 |
| Cu | -0.838689 | -0.442832 | 1.110625  |
| H  | -2.232851 | -2.116306 | 2.646448  |
| H  | -2.207099 | -0.385970 | 3.286106  |
| H  | 0.205234  | -0.456003 | 3.590253  |

121

Figure 1\_ts(CuBadd)\_major02\_01 / electronic energy: -4987.94649355 a.u. / lowest freq: -62.89 cm-1

|   |           |           |           |
|---|-----------|-----------|-----------|
| B | -2.895459 | 0.403111  | 0.628571  |
| O | -3.465953 | 1.574472  | 1.121393  |
| O | -3.842044 | -0.261248 | -0.140558 |
| C | -4.876702 | 1.581503  | 0.867056  |
| C | -5.006747 | 0.559189  | -0.317420 |
| C | -5.313736 | 3.001314  | 0.537650  |
| C | -5.565391 | 1.110323  | 2.148211  |
| C | -4.901240 | 1.216325  | -1.693602 |
| C | -6.243530 | -0.326352 | -0.268793 |
| H | -3.996627 | 1.836525  | -1.773832 |
| H | -5.777317 | 1.844118  | -1.913718 |

|   |           |           |           |
|---|-----------|-----------|-----------|
| H | -4.843212 | 0.432772  | -2.463151 |
| H | -6.283319 | -0.920479 | 0.653601  |
| H | -6.230282 | -1.026133 | -1.117833 |
| H | -7.163211 | 0.274943  | -0.337410 |
| H | -5.265130 | 0.085151  | 2.411569  |
| H | -6.661652 | 1.141070  | 2.061087  |
| H | -5.268929 | 1.770724  | 2.976952  |
| H | -4.726556 | 3.426125  | -0.287364 |
| H | -5.170313 | 3.646545  | 1.417180  |
| H | -6.379579 | 3.032402  | 0.263760  |
| C | 1.219172  | -2.486198 | 3.807053  |
| C | 1.677476  | -3.791185 | 3.973917  |
| C | -0.070227 | -2.219967 | 3.312415  |
| C | 0.854931  | -4.873739 | 3.658463  |
| C | -0.888722 | -3.324208 | 3.004491  |
| C | -0.432684 | -4.628379 | 3.175880  |
| C | -0.519167 | -0.824202 | 3.170283  |
| C | -1.846273 | -0.451143 | 2.969645  |
| H | -1.088280 | -5.463978 | 2.918032  |
| H | -1.892842 | -3.164904 | 2.605729  |
| H | 1.212565  | -5.897924 | 3.787170  |
| H | 2.686964  | -3.963047 | 4.356168  |
| H | 1.871435  | -1.648097 | 4.065780  |
| P | 0.545013  | 1.658626  | 0.682911  |
| C | -0.069585 | 2.893934  | 3.105393  |
| C | 0.071210  | 3.827057  | 4.134667  |
| C | 0.834620  | 2.867640  | 2.038944  |
| C | 1.122573  | 4.740342  | 4.107814  |
| C | 1.884193  | 3.797642  | 2.016578  |
| C | 2.029577  | 4.724282  | 3.045295  |
| C | -1.690052 | 3.832730  | -2.008078 |
| C | -1.274006 | 2.922091  | -1.035725 |
| C | 0.073860  | 2.821063  | -0.680712 |
| C | -0.760941 | 4.654063  | -2.642130 |
| C | 0.587811  | 4.559994  | -2.296277 |
| C | 0.999192  | 3.652079  | -1.323613 |
| C | 3.392118  | 0.955286  | 1.200353  |
| C | 2.217614  | 1.088740  | 0.245180  |
| C | 2.572464  | 0.489122  | -0.913782 |
| C | 3.453346  | -0.559566 | 1.549238  |
| C | 3.970581  | -1.182141 | 0.238023  |
| C | 4.034996  | 0.020985  | -0.750074 |
| C | 4.821188  | -0.282480 | -2.009869 |
| C | 4.590657  | 1.126192  | 0.223671  |
| C | 5.955490  | 0.810196  | 0.847424  |
| C | 4.714857  | 2.522670  | -0.385507 |
| C | 1.640483  | 0.350452  | -2.069640 |
| C | 1.789043  | 1.097759  | -3.214403 |
| C | 0.334419  | -0.310639 | -2.015102 |
| S | 0.349143  | 1.076186  | -4.164802 |
| C | -0.491809 | 0.054342  | -3.051115 |
| C | 2.926888  | 1.960489  | -3.661214 |
| C | -1.947566 | -0.207415 | -3.298150 |
| P | -0.130241 | -1.485317 | -0.677497 |
| C | -3.474288 | -3.852399 | -0.978209 |
| C | -2.520932 | -2.924508 | -0.552580 |
| C | -3.351063 | -4.458454 | -2.225436 |
| C | -1.434290 | -2.600765 | -1.366416 |
| C | -2.263245 | -4.143276 | -3.044881 |
| C | -1.308052 | -3.229213 | -2.613268 |
| C | 2.426000  | -4.576339 | 0.200765  |
| C | 1.466120  | -3.567735 | 0.274946  |
| C | 3.158874  | -4.759923 | -0.971154 |
| C | 1.228710  | -2.729700 | -0.818345 |
| C | 2.920676  | -3.934621 | -2.071336 |
| C | 1.960601  | -2.927395 | -1.996972 |
| H | -0.899009 | 2.184778  | 3.124916  |
| H | -0.646786 | 3.837040  | 4.957930  |
| H | 1.235504  | 5.471218  | 4.912168  |
| H | 2.598215  | 3.798147  | 1.189890  |
| H | 2.852419  | 5.442499  | 3.017070  |
| H | -2.750038 | 3.898018  | -2.266791 |
| H | -2.009878 | 2.296835  | -0.530925 |
| H | -1.084463 | 5.366599  | -3.404668 |
| H | 1.327081  | 5.197264  | -2.787688 |
| H | 2.057566  | 3.586000  | -1.073106 |
| H | 3.380536  | 1.620120  | 2.073106  |
| H | 2.457581  | -0.934133 | 1.824847  |
| H | 4.126864  | -0.752023 | 2.397417  |
| H | 3.330790  | -1.975886 | -0.140804 |
| H | 4.975369  | -1.612880 | 0.355799  |
| H | 5.776800  | -0.768898 | -1.759930 |
| H | 5.050882  | 0.622692  | -2.588744 |
| H | 4.262610  | -0.970088 | -2.664224 |
| H | 6.222830  | 1.597058  | 1.570366  |
| H | 6.737242  | 0.803176  | 0.071028  |
| H | 6.007474  | -0.147876 | 1.378045  |
| H | 5.001087  | 3.253482  | 0.387043  |
| H | 3.787470  | 2.874017  | -0.848179 |
| H | 5.502571  | 2.539725  | -1.155542 |
| H | 3.568380  | 2.229903  | -2.815018 |
| H | 2.561770  | 2.893275  | -4.116159 |
| H | 3.551503  | 1.448593  | -4.410630 |
| H | -2.412810 | 0.681185  | -3.750494 |
| H | -2.472535 | -0.415230 | -2.356639 |
| H | -2.117595 | -1.053967 | -3.981012 |
| H | -4.320085 | -4.094190 | -0.330016 |

|    |           |           |           |
|----|-----------|-----------|-----------|
| H  | -2.631526 | -2.432027 | 0.413972  |
| H  | -4.098566 | -5.180935 | -2.562132 |
| H  | -2.156567 | -4.619043 | -4.022706 |
| H  | -0.458124 | -2.997834 | -3.259508 |
| H  | 2.604561  | -5.212918 | 1.070628  |
| H  | 0.908406  | -3.420997 | 1.199189  |
| H  | 3.917292  | -5.544313 | -1.027805 |
| H  | 3.488764  | -4.072246 | -2.994476 |
| H  | 1.794710  | -2.281731 | -2.861823 |
| Cu | -0.977764 | -0.157313 | 1.120391  |
| H  | -2.637009 | -1.206479 | 2.944848  |
| H  | -2.190704 | 0.542368  | 3.264345  |
| H  | 0.187326  | -0.069144 | 3.530069  |

121

Figure 1\_ts(CuBadd)\_major02\_02 / electronic energy: -4987.94870159 a.u. / lowest freq: -97.75 cm-1

|   |           |           |           |
|---|-----------|-----------|-----------|
| B | -2.209108 | -1.757502 | 0.314879  |
| O | -3.363618 | -1.022929 | 0.525868  |
| O | -2.525697 | -2.949127 | -0.318769 |
| C | -4.507979 | -1.828172 | 0.212289  |
| C | -3.896677 | -2.907443 | -0.750554 |
| C | -5.575678 | -0.946791 | -0.417245 |
| C | -5.018889 | -2.418269 | 1.526272  |
| C | -3.897392 | -2.475785 | -2.216712 |
| C | -4.502161 | -4.296433 | -0.619755 |
| H | -3.474874 | -1.467972 | -2.337734 |
| H | -4.910653 | -2.483491 | -2.644287 |
| H | -3.275442 | -3.174352 | -2.796225 |
| H | -4.358529 | -4.711736 | 0.386306  |
| H | -4.025118 | -4.980842 | -1.337400 |
| H | -5.580582 | -4.274402 | -0.839518 |
| H | -4.270574 | -3.077512 | 1.990883  |
| H | -5.946748 | -2.991517 | 1.383606  |
| H | -5.227197 | -1.597219 | 2.228551  |
| H | -5.176896 | -0.376549 | -1.266281 |
| H | -5.949836 | -0.225596 | 0.324920  |
| H | -6.429079 | -1.549644 | -0.763936 |
| C | 2.262496  | -1.795569 | 3.891445  |
| C | 3.495089  | -2.428655 | 4.032115  |
| C | 1.300995  | -2.249534 | 2.964027  |
| C | 3.814649  | -3.540486 | 3.249749  |
| C | 1.634417  | -3.388194 | 2.198717  |
| C | 2.869798  | -4.013749 | 2.335030  |
| C | 0.032762  | -1.534147 | 2.816697  |
| C | -1.146906 | -2.132436 | 2.277280  |
| H | 3.101797  | -4.879804 | 1.708919  |
| H | 0.928114  | -3.764141 | 1.454764  |
| H | 4.784798  | -4.032148 | 3.351611  |
| H | 4.217479  | -2.045890 | 4.758525  |
| H | 2.033014  | -0.917344 | 4.502468  |
| P | -0.991194 | 1.289230  | 0.777149  |
| C | -0.852658 | 1.860957  | 3.524951  |
| C | -1.387927 | 2.045340  | 4.798437  |
| C | -1.691694 | 1.735049  | 2.407255  |
| C | -2.770396 | 2.082884  | 4.980639  |
| C | -3.079430 | 1.750142  | 2.604218  |
| C | -3.612880 | 1.926348  | 3.880598  |
| C | -3.686552 | 3.668273  | -1.263532 |
| C | -2.799054 | 3.191706  | -0.300799 |
| C | -2.212325 | 1.926425  | -0.440527 |
| C | -3.984686 | 2.890869  | -2.384608 |
| C | -3.386932 | 1.640624  | -2.540646 |
| C | -2.508051 | 1.160691  | -1.569974 |
| C | 1.073986  | 3.394758  | 1.372224  |
| C | 0.404806  | 2.399318  | 0.443323  |
| C | 1.096853  | 2.376191  | -0.717727 |
| C | 2.403919  | 2.716566  | 1.797733  |
| C | 3.211051  | 2.744780  | 0.483857  |
| C | 2.243450  | 3.401548  | -0.553036 |
| C | 2.972461  | 3.868903  | -1.797405 |
| C | 1.548449  | 4.474623  | 0.362852  |
| C | 2.503408  | 5.518734  | 0.951712  |
| C | 0.383966  | 5.246396  | -0.258480 |
| C | 0.799017  | 1.569088  | -1.942162 |
| C | 0.301451  | 2.186722  | -3.069403 |
| C | 0.907063  | 0.115987  | -2.125864 |
| S | 0.007129  | 1.054134  | -4.331159 |
| C | 0.515378  | -0.293781 | -3.381500 |
| C | -0.158943 | 3.593677  | -3.280739 |
| C | 0.439685  | -1.641707 | -4.040068 |
| P | 1.356159  | -1.004874 | -0.737572 |
| C | 0.580152  | -4.891453 | -1.823490 |
| C | 0.468903  | -3.577060 | -1.373999 |
| C | 1.801914  | -5.372661 | -2.293056 |
| C | 1.573252  | -2.715745 | -1.405327 |
| C | 2.913020  | -4.529871 | -2.304482 |
| C | 2.800912  | -3.212153 | -1.861638 |
| C | 5.023394  | -0.456566 | 1.024124  |
| C | 3.675446  | -0.738091 | 0.803335  |
| C | 5.819030  | 0.018924  | -0.017613 |
| C | 3.110819  | -0.545328 | -0.460116 |
| C | 5.262518  | 0.212646  | -1.283378 |
| C | 3.915605  | -0.067247 | -1.504068 |
| H | 0.230847  | 1.795907  | 3.408107  |
| H | -0.717000 | 2.148985  | 5.654407  |
| H | -3.190578 | 2.222388  | 5.979417  |
| H | -3.752142 | 1.608118  | 1.756770  |
| H | -4.697217 | 1.937644  | 4.014445  |

|    |           |           |           |
|----|-----------|-----------|-----------|
| H  | -4.146467 | 4.651519  | -1.139115 |
| H  | -2.567643 | 3.809067  | 0.571251  |
| H  | -4.681244 | 3.263737  | -3.139481 |
| H  | -3.606164 | 1.033080  | -3.421951 |
| H  | -2.034821 | 0.184111  | -1.693551 |
| H  | 0.452579  | 3.764185  | 2.197893  |
| H  | 2.231406  | 1.693179  | 2.163471  |
| H  | 2.898751  | 3.276889  | 2.604798  |
| H  | 3.515443  | 1.753207  | 0.150284  |
| H  | 4.126641  | 3.346858  | 0.575591  |
| H  | 3.796134  | 4.545472  | -1.520774 |
| H  | 2.324784  | 4.407518  | -2.502845 |
| H  | 3.415045  | 3.014563  | -2.333395 |
| H  | 1.989750  | 6.094741  | 1.738167  |
| H  | 2.809205  | 6.234931  | 0.172505  |
| H  | 3.417772  | 5.104552  | 1.393806  |
| H  | -0.061650 | 5.915209  | 0.495453  |
| H  | -0.414277 | 4.594207  | -0.631576 |
| H  | 0.730038  | 5.883922  | -1.087972 |
| H  | 0.323138  | 4.286554  | -2.588663 |
| H  | -1.246214 | 3.664137  | -3.111111 |
| H  | 0.043799  | 3.938137  | -4.305771 |
| H  | 0.192112  | -1.530565 | -5.105496 |
| H  | -0.337760 | -2.269905 | -3.582094 |
| H  | 1.389988  | -2.186728 | -3.973557 |
| H  | -0.295958 | -5.544125 | -1.796870 |
| H  | -0.495752 | -3.222897 | -1.004980 |
| H  | 1.892246  | -6.405093 | -2.639366 |
| H  | 3.878289  | -4.899139 | -2.659182 |
| H  | 3.686103  | -2.575080 | -1.878226 |
| H  | 5.449496  | -0.606877 | 2.018809  |
| H  | 3.056941  | -1.098707 | 1.625202  |
| H  | 6.874351  | 0.241892  | 0.156246  |
| H  | 5.879976  | 0.588350  | -2.102628 |
| H  | 3.485358  | 0.091887  | -2.495852 |
| Cu | -0.388277 | -0.945841 | 0.810856  |
| H  | -1.145082 | -3.209061 | 2.072280  |
| H  | -2.099916 | -1.772878 | 2.678940  |
| H  | -0.105832 | -0.686955 | 3.494478  |

121

Figure 1\_ts(CuBadd)\_major02\_03 / electronic energy: -4987.94870162 a.u. / lowest freq: -97.74 cm<sup>-1</sup>

|   |           |           |           |
|---|-----------|-----------|-----------|
| B | -2.209124 | -1.757493 | 0.314894  |
| O | -3.363630 | -1.022911 | 0.525878  |
| O | -2.525721 | -2.949119 | -0.318749 |
| C | -4.507996 | -1.828147 | 0.212299  |
| C | -3.896698 | -2.907425 | -0.750539 |
| C | -5.575687 | -0.946759 | -0.417240 |
| C | -5.018913 | -2.418237 | 1.526282  |
| C | -3.897405 | -2.475769 | -2.216698 |
| C | -4.502194 | -4.296409 | -0.619739 |
| H | -3.474872 | -1.467961 | -2.337721 |
| H | -4.910666 | -2.483460 | -2.644274 |
| H | -3.275465 | -3.174346 | -2.796210 |
| H | -4.358560 | -4.711714 | 0.386321  |
| H | -4.025163 | -4.980822 | -1.337388 |
| H | -5.580617 | -4.274367 | -0.839495 |
| H | -4.270601 | -3.077482 | 1.990897  |
| H | -5.946773 | -2.991483 | 1.383614  |
| H | -5.227221 | -1.597185 | 2.228558  |
| H | -5.176896 | -0.376518 | -1.266271 |
| H | -5.949845 | -0.225564 | 0.324924  |
| H | -6.429088 | -1.549608 | -0.763937 |
| C | 2.262501  | -1.795589 | 3.891438  |
| C | 3.495090  | -2.428687 | 4.032098  |
| C | 1.300989  | -2.249545 | 2.964027  |
| C | 3.814633  | -3.540519 | 3.249727  |
| C | 1.634393  | -3.388207 | 2.198715  |
| C | 2.869769  | -4.013774 | 2.335016  |
| C | 0.032761  | -1.534145 | 2.816706  |
| C | -1.146916 | -2.132424 | 2.277299  |
| H | 3.101755  | -4.879831 | 1.708903  |
| H | 0.928079  | -3.764148 | 1.454769  |
| H | 4.784779  | -4.032190 | 3.351580  |
| H | 4.217489  | -2.045930 | 4.758502  |
| H | 2.033033  | -0.917363 | 4.502464  |
| P | -0.991180 | 1.289240  | 0.777154  |
| C | -0.852617 | 1.860967  | 3.524952  |
| C | -1.387873 | 2.045367  | 4.798441  |
| C | -1.691664 | 1.735080  | 2.407262  |
| C | -2.770340 | 2.082951  | 4.980652  |
| C | -3.079398 | 1.750214  | 2.604233  |
| C | -3.612835 | 1.926438  | 3.880616  |
| C | -3.686512 | 3.668297  | -1.263544 |
| C | -2.799017 | 3.191729  | -0.300808 |
| C | -2.212309 | 1.926437  | -0.440522 |
| C | -3.984662 | 2.890882  | -2.384608 |
| C | -3.386930 | 1.640626  | -2.540632 |
| C | -2.508052 | 1.160692  | -1.569958 |
| C | 1.074020  | 3.394749  | 1.372214  |
| C | 0.404829  | 2.399314  | 0.443317  |
| C | 1.096867  | 2.376185  | -0.717738 |
| C | 2.403954  | 2.716552  | 1.797713  |
| C | 3.211075  | 2.744763  | 0.483831  |
| C | 2.243469  | 3.401537  | -0.553055 |
| C | 2.972477  | 3.868891  | -1.797426 |
| C | 1.548480  | 4.474614  | 0.362840  |
| C | 2.503447  | 5.518721  | 0.951694  |

|    |           |           |           |
|----|-----------|-----------|-----------|
| C  | 0.383994  | 5.246392  | -0.258481 |
| C  | 0.799017  | 1.569082  | -1.942171 |
| C  | 0.301455  | 2.186715  | -3.069413 |
| C  | 0.907049  | 0.115978  | -2.125866 |
| S  | 0.007117  | 1.054125  | -4.331163 |
| C  | 0.515355  | -0.293791 | -3.381499 |
| C  | -0.158921 | 3.593675  | -3.280757 |
| C  | 0.439646  | -1.641719 | -4.040060 |
| P  | 1.356140  | -1.004882 | -0.737573 |
| C  | 2.912981  | -4.529892 | -2.304477 |
| C  | 2.800879  | -3.212171 | -1.861642 |
| C  | 1.801873  | -5.372680 | -2.293036 |
| C  | 1.573223  | -2.715757 | -1.405326 |
| C  | 0.580116  | -4.891465 | -1.823466 |
| C  | 0.468872  | -3.577069 | -1.373984 |
| C  | 5.262510  | 0.212595  | -1.283396 |
| C  | 3.915593  | -0.067284 | -1.504082 |
| C  | 5.819023  | 0.018875  | -0.017631 |
| C  | 3.110805  | -0.545349 | -0.460124 |
| C  | 5.023384  | -0.456598 | 1.024111  |
| C  | 3.675432  | -0.738109 | 0.803327  |
| H  | 0.230886  | 1.795885  | 3.408102  |
| H  | -0.716937 | 2.148994  | 5.654407  |
| H  | -3.190511 | 2.222468  | 5.979432  |
| H  | -3.752121 | 1.608211  | 1.756790  |
| H  | -4.697171 | 1.937767  | 4.014470  |
| H  | -4.146410 | 4.651552  | -1.139139 |
| H  | -2.567593 | 3.809098  | 0.571232  |
| H  | -4.681218 | 3.263752  | -3.139483 |
| H  | -3.606175 | 1.033073  | -3.421927 |
| H  | -2.034839 | 0.184102  | -1.693522 |
| H  | 0.452622  | 3.764178  | 2.197889  |
| H  | 2.231441  | 1.693166  | 2.163452  |
| H  | 2.898794  | 3.276874  | 2.604773  |
| H  | 3.515460  | 1.753190  | 0.150253  |
| H  | 4.126669  | 3.346837  | 0.575557  |
| H  | 3.796138  | 4.545475  | -1.520798 |
| H  | 2.324796  | 4.407490  | -2.502875 |
| H  | 3.415077  | 3.014553  | -2.333405 |
| H  | 1.989797  | 6.094726  | 1.738155  |
| H  | 2.809239  | 6.234919  | 0.172486  |
| H  | 3.417814  | 5.104535  | 1.393778  |
| H  | -0.061615 | 5.915204  | 0.495458  |
| H  | -0.414254 | 4.594206  | -0.631570 |
| H  | 0.730060  | 5.883919  | -1.087973 |
| H  | 0.323126  | 4.286541  | -2.588646 |
| H  | -1.246201 | 3.664138  | -3.111184 |
| H  | 0.043875  | 3.938148  | -4.305774 |
| H  | 0.192053  | -1.530581 | -5.105484 |
| H  | -0.337791 | -2.269913 | -3.582068 |
| H  | 1.389950  | -2.186743 | -3.973565 |
| H  | 3.878246  | -4.899164 | -2.659181 |
| H  | 3.686071  | -2.575100 | -1.878240 |
| H  | 1.892201  | -6.405116 | -2.639338 |
| H  | -0.295995 | -5.544136 | -1.796834 |
| H  | -0.495780 | -3.222903 | -1.004961 |
| H  | 5.879971  | 0.588286  | -2.102649 |
| H  | 3.485347  | 0.091848  | -2.495865 |
| H  | 6.874347  | 0.241832  | 0.156225  |
| H  | 5.449486  | -0.606909 | 2.018796  |
| H  | 3.056925  | -1.098714 | 1.625197  |
| Cu | -0.388287 | -0.945838 | 0.810864  |
| H  | -1.145103 | -3.209049 | 2.072303  |
| H  | -2.099920 | -1.772854 | 2.678963  |
| H  | -0.105818 | -0.686948 | 3.494484  |

121

Figure 1\_ts(CuBadd)\_major02\_04 / electronic energy: -4987.94870153 a.u. / lowest freq: -97.74 cm-1

|   |           |           |           |
|---|-----------|-----------|-----------|
| B | -2.209089 | -1.757533 | 0.314888  |
| O | -3.363609 | -1.022974 | 0.525877  |
| O | -2.525662 | -2.949159 | -0.318766 |
| C | -4.507960 | -1.828229 | 0.212290  |
| C | -3.896641 | -2.907489 | -0.750556 |
| C | -5.575667 | -0.946859 | -0.417245 |
| C | -5.018868 | -2.418338 | 1.526269  |
| C | -3.897356 | -2.475822 | -2.216711 |
| C | -4.502109 | -4.296485 | -0.619767 |
| H | -3.474854 | -1.468000 | -2.337725 |
| H | -4.910615 | -2.483543 | -2.644291 |
| H | -3.275392 | -3.174375 | -2.796226 |
| H | -4.358476 | -4.711793 | 0.386293  |
| H | -4.025057 | -4.980885 | -1.337415 |
| H | -5.580530 | -4.274466 | -0.839533 |
| H | -4.270548 | -3.077577 | 1.990878  |
| H | -5.946721 | -2.991593 | 1.383596  |
| H | -5.227185 | -1.597293 | 2.228551  |
| H | -5.176886 | -0.376603 | -1.266271 |
| H | -5.949842 | -0.225676 | 0.324923  |
| H | -6.429054 | -1.549723 | -0.763949 |
| C | 2.262527  | -1.795557 | 3.891445  |
| C | 3.495128  | -2.428631 | 4.032108  |
| C | 1.301029  | -2.249526 | 2.964027  |
| C | 3.814697  | -3.540453 | 3.249733  |
| C | 1.634459  | -3.388178 | 2.198710  |
| C | 2.869848  | -4.013720 | 2.335013  |
| C | 0.032789  | -1.534150 | 2.816704  |
| C | -1.146877 | -2.132452 | 2.277293  |
| H | 3.101854  | -4.879769 | 1.708896  |

|    |           |           |           |
|----|-----------|-----------|-----------|
| H  | 0.928157  | -3.764126 | 1.454756  |
| H  | 4.784851  | -4.032106 | 3.351588  |
| H  | 4.217516  | -2.045865 | 4.758519  |
| H  | 2.033038  | -0.917339 | 4.502476  |
| P  | -0.991208 | 1.289215  | 0.777151  |
| C  | -3.079445 | 1.750126  | 2.604222  |
| C  | -3.612894 | 1.926334  | 3.880603  |
| C  | -1.691710 | 1.735031  | 2.407258  |
| C  | -2.770409 | 2.082868  | 4.980643  |
| C  | -0.852672 | 1.860938  | 3.524953  |
| C  | -1.387940 | 2.045322  | 4.798440  |
| C  | -3.686579 | 3.668239  | -1.263532 |
| C  | -2.799078 | 3.191677  | -0.300799 |
| C  | -2.212347 | 1.926396  | -0.440523 |
| C  | -3.984714 | 2.890829  | -2.384603 |
| C  | -3.386959 | 1.640584  | -2.540637 |
| C  | -2.508074 | 1.160657  | -1.569967 |
| C  | 1.073947  | 3.394764  | 1.372226  |
| C  | 0.404778  | 2.399320  | 0.443324  |
| C  | 1.096821  | 2.376207  | -0.717729 |
| C  | 2.403892  | 2.716588  | 1.797726  |
| C  | 3.211018  | 2.744821  | 0.483848  |
| C  | 2.243403  | 3.401580  | -0.553039 |
| C  | 2.972405  | 3.868952  | -1.797407 |
| C  | 1.548390  | 4.474641  | 0.362856  |
| C  | 2.503338  | 5.518763  | 0.951714  |
| C  | 0.383892  | 5.246398  | -0.258466 |
| C  | 0.798993  | 1.569101  | -1.942165 |
| C  | 0.301424  | 2.186729  | -3.069407 |
| C  | 0.907056  | 0.116001  | -2.125865 |
| S  | 0.007116  | 1.054138  | -4.331163 |
| C  | 0.515378  | -0.293772 | -3.381502 |
| C  | -0.158982 | 3.593680  | -3.280746 |
| C  | 0.439706  | -1.641698 | -4.040070 |
| P  | 1.356164  | -1.004855 | -0.737573 |
| C  | 0.580207  | -4.891446 | -1.823485 |
| C  | 0.468940  | -3.577054 | -1.373996 |
| C  | 1.801974  | -5.372638 | -2.293053 |
| C  | 1.573277  | -2.715724 | -1.405331 |
| C  | 2.913068  | -4.529832 | -2.304487 |
| C  | 2.800942  | -3.212115 | -1.861645 |
| C  | 5.023393  | -0.456504 | 1.024123  |
| C  | 3.675447  | -0.738039 | 0.803335  |
| C  | 5.819026  | 0.018984  | -0.017617 |
| C  | 3.110819  | -0.545291 | -0.460118 |
| C  | 5.262513  | 0.212695  | -1.283384 |
| C  | 3.915602  | -0.067209 | -1.504073 |
| H  | -3.752158 | 1.608104  | 1.756775  |
| H  | -4.697230 | 1.937631  | 4.014450  |
| H  | -3.190589 | 2.222373  | 5.979421  |
| H  | 0.230833  | 1.795888  | 3.408109  |
| H  | -0.717012 | 2.148967  | 5.654410  |
| H  | -4.146494 | 4.651485  | -1.139118 |
| H  | -2.567666 | 3.809042  | 0.571248  |
| H  | -4.681275 | 3.263693  | -3.139476 |
| H  | -3.606193 | 1.033035  | -3.421939 |
| H  | -2.034844 | 0.184077  | -1.693541 |
| H  | 0.452539  | 3.764179  | 2.197900  |
| H  | 2.231394  | 1.693197  | 2.163459  |
| H  | 2.898719  | 3.276913  | 2.604793  |
| H  | 3.515422  | 1.753255  | 0.150267  |
| H  | 4.126599  | 3.346913  | 0.575581  |
| H  | 3.796063  | 4.545539  | -1.520774 |
| H  | 2.324719  | 4.407553  | -2.502848 |
| H  | 3.415010  | 3.014622  | -2.333396 |
| H  | 1.989671  | 6.094774  | 1.738160  |
| H  | 2.809135  | 6.234955  | 0.172503  |
| H  | 3.417701  | 5.104590  | 1.393817  |
| H  | -0.061742 | 5.915188  | 0.495477  |
| H  | -0.414336 | 4.594196  | -0.631573 |
| H  | 0.729949  | 5.883945  | -1.087946 |
| H  | 0.323067  | 4.286559  | -2.588649 |
| H  | -1.246259 | 3.664124  | -3.111151 |
| H  | 0.043786  | 3.938152  | -4.305769 |
| H  | 0.192124  | -1.530561 | -5.105497 |
| H  | -0.337721 | -2.269914 | -3.582091 |
| H  | 1.390023  | -2.186700 | -3.973566 |
| H  | -0.295893 | -5.544132 | -1.796859 |
| H  | -0.495719 | -3.222904 | -1.004975 |
| H  | 1.892320  | -6.405070 | -2.639360 |
| H  | 3.878341  | -4.899086 | -2.659190 |
| H  | 3.686121  | -2.575028 | -1.878238 |
| H  | 5.449496  | -0.606806 | 2.018808  |
| H  | 3.056944  | -1.098655 | 1.625204  |
| H  | 6.874346  | 0.241959  | 0.156241  |
| H  | 5.879969  | 0.588397  | -2.102636 |
| H  | 3.485355  | 0.091916  | -2.495857 |
| Cu | -0.388266 | -0.945850 | 0.810862  |
| H  | -1.145042 | -3.209077 | 2.072296  |
| H  | -2.099888 | -1.772902 | 2.678957  |
| H  | -0.105809 | -0.686958 | 3.494485  |

121

Figure 1\_ts(CuBadd)\_major02\_05 / electronic energy: -4987.93948747 a.u. / lowest freq: -189.59 cm-1

|   |           |          |           |
|---|-----------|----------|-----------|
| B | 0.468913  | 2.551837 | -0.193809 |
| O | -0.737498 | 3.157495 | -0.443269 |
| O | 1.135490  | 3.200791 | 0.833143  |
| C | -0.823236 | 4.374256 | 0.317092  |



|   |           |           |           |
|---|-----------|-----------|-----------|
| C | 0.225779  | 4.121302  | 1.458764  |
| C | -2.252483 | 4.567712  | 0.797214  |
| C | -0.428071 | 5.511495  | -0.623017 |
| C | -0.374111 | 3.411746  | 2.672495  |
| C | 0.999226  | 5.352761  | 1.902225  |
| H | -0.930086 | 2.510317  | 2.372707  |
| H | -1.048968 | 4.070309  | 3.238294  |
| H | 0.438740  | 3.103441  | 3.346998  |
| H | 1.562954  | 5.799738  | 1.072926  |
| H | 1.717889  | 5.075226  | 2.687760  |
| H | 0.319368  | 6.113385  | 2.315724  |
| H | 0.602880  | 5.394331  | -0.989759 |
| H | -0.514591 | 6.493290  | -0.135322 |
| H | -1.099946 | 5.501280  | -1.494307 |
| H | -2.614964 | 3.695758  | 1.355905  |
| H | -2.919905 | 4.713286  | -0.065366 |
| H | -2.326536 | 5.457203  | 1.441884  |
| C | 4.963907  | 0.773438  | -2.460704 |
| C | 6.242918  | 0.760334  | -1.914353 |
| C | 3.899205  | 1.472599  | -1.844033 |
| C | 6.523179  | 1.455424  | -0.733827 |
| C | 4.206869  | 2.177642  | -0.653516 |
| C | 5.491323  | 2.164707  | -0.115943 |
| C | 2.552858  | 1.433178  | -2.396758 |
| C | 1.538705  | 2.392461  | -1.990974 |
| H | 5.682980  | 2.708640  | 0.813290  |
| H | 3.418728  | 2.715972  | -0.119905 |
| H | 7.527048  | 1.442069  | -0.302991 |
| H | 7.036894  | 0.203217  | -2.420320 |
| H | 4.770359  | 0.227662  | -3.389388 |
| P | -2.644119 | 0.468481  | 0.292261  |
| C | -3.107504 | 2.215393  | -1.886307 |
| C | -3.783653 | 3.222842  | -2.570431 |
| C | -3.625102 | 1.673096  | -0.701085 |
| C | -4.982906 | 3.731871  | -2.070706 |
| C | -4.825899 | 2.200976  | -0.204613 |
| C | -5.497493 | 3.220102  | -0.880773 |
| C | -6.082689 | -1.630795 | 1.334429  |
| C | -5.134340 | -0.933995 | 0.589439  |
| C | -3.977622 | -0.427152 | 1.202092  |
| C | -5.884479 | -1.837442 | 2.702352  |
| C | -4.740873 | -1.336923 | 3.321246  |
| C | -3.796237 | -0.629933 | 2.574049  |
| C | -2.358155 | -0.864748 | -2.425396 |
| C | -2.125808 | -0.809191 | -0.921486 |
| C | -1.355299 | -1.873760 | -0.605340 |
| C | -0.990596 | -0.506994 | -3.071339 |
| C | -0.126099 | -1.738766 | -2.725092 |
| C | -1.090534 | -2.652655 | -1.905489 |
| C | -0.615436 | -4.082786 | -1.758132 |
| C | -2.437438 | -2.397646 | -2.670845 |
| C | -2.419419 | -2.799489 | -4.150474 |
| C | -3.671724 | -3.053043 | -2.052867 |
| C | -0.866065 | -2.265853 | 0.745121  |
| C | -1.605026 | -3.097261 | 1.556808  |
| C | 0.384351  | -1.863278 | 1.370342  |
| S | -0.821014 | -3.336289 | 3.071512  |
| C | 0.540202  | -2.370005 | 2.644966  |
| C | -2.910859 | -3.781472 | 1.300613  |
| C | 1.659084  | -2.270166 | 3.640310  |
| P | 1.672227  | -0.994169 | 0.416053  |
| C | 3.369940  | 1.367246  | 3.287943  |
| C | 2.478202  | 0.778686  | 2.395734  |
| C | 4.677836  | 0.889716  | 3.388480  |
| C | 2.881270  | -0.306588 | 1.608165  |
| C | 5.090421  | -0.173259 | 2.586488  |
| C | 4.197834  | -0.768617 | 1.695753  |
| C | 3.970284  | -3.184913 | -2.181503 |
| C | 3.250494  | -2.162978 | -1.565179 |
| C | 4.016522  | -4.452724 | -1.602602 |
| C | 2.575102  | -2.395610 | -0.362787 |
| C | 3.342114  | -4.693798 | -0.404996 |
| C | 2.623615  | -3.671135 | 0.212619  |
| H | -2.149903 | 1.869244  | -2.272782 |
| H | -3.359783 | 3.623362  | -3.494651 |
| H | -5.509311 | 4.527878  | -2.602989 |
| H | -5.248977 | 1.822129  | 0.728329  |
| H | -6.430100 | 3.615102  | -0.470254 |
| H | -6.978247 | -2.022200 | 0.846042  |
| H | -5.295647 | -0.778158 | -0.480089 |
| H | -6.625631 | -2.390095 | 3.284792  |
| H | -4.579997 | -1.495862 | 4.390110  |
| H | -2.898329 | -0.240460 | 3.061533  |
| H | -3.208723 | -0.280490 | -2.798774 |
| H | -0.575765 | 0.419234  | -2.646916 |
| H | -1.088550 | -0.352532 | -4.155516 |
| H | 0.762795  | -1.467490 | -2.145806 |
| H | 0.232371  | -2.265504 | -3.621638 |
| H | -0.497954 | -4.556149 | -2.745603 |
| H | -1.319343 | -4.692172 | -1.171087 |
| H | 0.361988  | -4.124542 | -1.254077 |
| H | -3.313900 | -2.400916 | -4.655483 |
| H | -2.453315 | -3.896316 | -4.248427 |
| H | -1.543012 | -2.448041 | -4.708667 |
| H | -4.572676 | -2.768140 | -2.619777 |
| H | -3.832046 | -2.766881 | -1.009128 |
| H | -3.593276 | -4.151253 | -2.098467 |

|    |           |           |           |
|----|-----------|-----------|-----------|
| H  | -3.705741 | -3.057101 | 1.084359  |
| H  | -3.227037 | -4.373136 | 2.171158  |
| H  | -2.837079 | -4.464623 | 0.441736  |
| H  | 1.472961  | -2.935825 | 4.495005  |
| H  | 1.771044  | -1.248000 | 4.029495  |
| H  | 2.620665  | -2.560027 | 3.195037  |
| H  | 3.044401  | 2.211502  | 3.900487  |
| H  | 1.465775  | 1.174350  | 2.301956  |
| H  | 5.379440  | 1.354461  | 4.085308  |
| H  | 6.117002  | -0.541486 | 2.647790  |
| H  | 4.536018  | -1.597685 | 1.071417  |
| H  | 4.492068  | -2.989330 | -3.121111 |
| H  | 3.199817  | -1.171773 | -2.020824 |
| H  | 4.574080  | -5.257501 | -2.087684 |
| H  | 3.370842  | -5.685930 | 0.051150  |
| H  | 2.088028  | -3.877093 | 1.141866  |
| Cu | 1.242135  | 0.773601  | -0.883446 |
| H  | 1.897135  | 3.358691  | -1.606206 |
| H  | 0.707858  | 2.530408  | -2.692330 |
| H  | 2.418881  | 0.915221  | -3.351375 |

121

Figure 1\_ts(CuBadd)\_major02\_06 / electronic energy: -4987.94647940 a.u. / lowest freq: -60.64 cm<sup>-1</sup>

|   |           |           |           |
|---|-----------|-----------|-----------|
| B | -2.871225 | 0.536110  | 0.599881  |
| O | -3.452270 | 1.674784  | 1.154448  |
| O | -3.798478 | -0.066795 | -0.241548 |
| C | -4.860494 | 1.685342  | 0.885697  |
| C | -4.964936 | 0.757828  | -0.375944 |
| C | -5.316578 | 3.120328  | 0.667299  |
| C | -5.555365 | 1.100812  | 2.116170  |
| C | -4.844931 | 1.518658  | -1.696140 |
| C | -6.196406 | -0.136715 | -0.412752 |
| H | -3.948567 | 2.155429  | -1.713417 |
| H | -5.726458 | 2.149301  | -1.883589 |
| H | -4.762322 | 0.795713  | -2.520697 |
| H | -6.225928 | -0.823597 | 0.443274  |
| H | -6.184738 | -0.746329 | -1.328902 |
| H | -7.120574 | 0.461801  | -0.415323 |
| H | -5.243337 | 0.061168  | 2.295268  |
| H | -6.651002 | 1.124032  | 2.020011  |
| H | -5.275914 | 1.692596  | 3.000814  |
| H | -4.722326 | 3.622722  | -0.107418 |
| H | -5.200595 | 3.690965  | 1.600896  |
| H | -6.377774 | 3.156883  | 0.376583  |
| C | 1.117436  | -2.546472 | 3.785219  |
| C | 1.509032  | -3.873773 | 3.948140  |
| C | -0.161193 | -2.214310 | 3.303226  |
| C | 0.628621  | -4.912037 | 3.640928  |
| C | -1.038314 | -3.274630 | 3.003405  |
| C | -0.649090 | -4.600628 | 3.170322  |
| C | -0.543728 | -0.797662 | 3.167395  |
| C | -1.850313 | -0.362679 | 2.971837  |
| H | -1.349932 | -5.400905 | 2.919850  |
| H | -2.037711 | -3.064372 | 2.617285  |
| H | 0.932874  | -5.953551 | 3.767620  |
| H | 2.511990  | -4.097759 | 4.320362  |
| H | 1.814606  | -1.743595 | 4.037941  |
| P | 0.630428  | 1.640017  | 0.694948  |
| C | 0.046952  | 2.900832  | 3.108153  |
| C | 0.214935  | 3.826336  | 4.140031  |
| C | 0.969616  | 2.826150  | 2.059817  |
| C | 1.312404  | 4.684186  | 4.134347  |
| C | 2.066588  | 3.700156  | 2.059095  |
| C | 2.238888  | 4.619166  | 3.090786  |
| C | -1.502288 | 3.922730  | -1.989728 |
| C | -1.127507 | 2.983566  | -1.027810 |
| C | 0.211412  | 2.834150  | -0.657712 |
| C | -0.539334 | 4.724065  | -2.598158 |
| C | 0.801352  | 4.581872  | -2.237183 |
| C | 1.171045  | 3.646434  | -1.274240 |
| C | 3.445768  | 0.805806  | 1.197022  |
| C | 2.273633  | 0.997842  | 0.248897  |
| C | 2.594978  | 0.389814  | -0.915477 |
| C | 3.441762  | -0.711801 | 1.537462  |
| C | 3.923236  | -1.349400 | 0.220037  |
| C | 4.036173  | -0.144420 | -0.761883 |
| C | 4.801184  | -0.474059 | -2.027944 |
| C | 4.645341  | 0.929833  | 0.215058  |
| C | 5.998917  | 0.551005  | 0.828485  |
| C | 4.826988  | 2.322960  | -0.387397 |
| C | 1.653300  | 0.299226  | -2.068821 |
| C | 1.830398  | 1.048200  | -3.208515 |
| C | 0.321936  | -0.311048 | -2.018452 |
| S | 0.391493  | 1.086707  | -4.159902 |
| C | -0.489046 | 0.092151  | -3.052236 |
| C | 3.000934  | 1.868328  | -3.650982 |
| C | -1.953307 | -0.111664 | -3.303225 |
| P | -0.189994 | -1.467731 | -0.682243 |
| C | -3.625439 | -3.701092 | -0.945952 |
| C | -2.632426 | -2.809943 | -0.533587 |
| C | -3.542109 | -4.309615 | -2.195391 |
| C | -1.545372 | -2.526261 | -1.361763 |
| C | -2.454701 | -4.034325 | -3.029547 |
| C | -1.459447 | -3.157718 | -2.610393 |
| C | 2.220032  | -4.675301 | 0.185084  |
| C | 1.305799  | -3.625341 | 0.260187  |
| C | 2.948174  | -4.886358 | -0.985208 |
| C | 1.110230  | -2.772174 | -0.829816 |

|    |           |           |           |
|----|-----------|-----------|-----------|
| C  | 2.749877  | -4.047203 | -2.082748 |
| C  | 1.835022  | -2.998636 | -2.007574 |
| H  | -0.819638 | 2.237089  | 3.110207  |
| H  | -0.518245 | 3.874228  | 4.948436  |
| H  | 1.446584  | 5.409461  | 4.940483  |
| H  | 2.796230  | 3.664552  | 1.247109  |
| H  | 3.098536  | 5.293504  | 3.078936  |
| H  | -2.555926 | 4.026021  | -2.261131 |
| H  | -1.887233 | 2.367860  | -0.546250 |
| H  | -0.830537 | 5.458411  | -3.352943 |
| H  | 1.566412  | 5.204002  | -2.708080 |
| H  | 2.223111  | 3.545660  | -1.008364 |
| H  | 3.468615  | 1.464361  | 2.074228  |
| H  | 2.431884  | -1.042754 | 1.817464  |
| H  | 4.111159  | -0.938058 | 2.380597  |
| H  | 3.245884  | -2.110906 | -0.159670 |
| H  | 4.908064  | -1.825972 | 0.329711  |
| H  | 5.737458  | -1.000973 | -1.786853 |
| H  | 5.064447  | 0.423774  | -2.604126 |
| H  | 4.210123  | -1.134268 | -2.682057 |
| H  | 6.303992  | 1.320725  | 1.554914  |
| H  | 6.775118  | 0.516789  | 0.047231  |
| H  | 6.014117  | -0.411791 | 1.352674  |
| H  | 5.148752  | 3.036851  | 0.387124  |
| H  | 3.913538  | 2.716652  | -0.843442 |
| H  | 5.611279  | 2.310108  | -1.161138 |
| H  | 3.659273  | 2.097163  | -2.806073 |
| H  | 2.673205  | 2.822607  | -4.089662 |
| H  | 3.598060  | 1.341715  | -4.412610 |
| H  | -2.379673 | 0.793597  | -3.760850 |
| H  | -2.490338 | -0.293124 | -2.362817 |
| H  | -2.154766 | -0.952739 | -3.984317 |
| H  | -4.470262 | -3.912627 | -0.286021 |
| H  | -2.710058 | -2.315188 | 0.435118  |
| H  | -4.320101 | -5.003969 | -2.522103 |
| H  | -2.379155 | -4.512847 | -4.008882 |
| H  | -0.609216 | -2.959010 | -3.267137 |
| H  | 2.366171  | -5.323590 | 1.052339  |
| H  | 0.750028  | -3.459521 | 1.182634  |
| H  | 3.672488  | -5.702352 | -1.042458 |
| H  | 3.314205  | -4.206457 | -3.004743 |
| H  | 1.700630  | -2.343419 | -2.870683 |
| Cu | -0.979252 | -0.096579 | 1.114412  |
| H  | -2.677353 | -1.077797 | 2.943734  |
| H  | -2.146905 | 0.648109  | 3.258915  |
| H  | 0.199953  | -0.076696 | 3.522193  |

121

Figure 1\_ts(CuBadd)\_major02\_07 / electronic energy: -4987.93946936 a.u. / lowest freq: -190.13 cm<sup>-1</sup>

|   |           |           |           |
|---|-----------|-----------|-----------|
| B | 0.470200  | -2.558350 | 0.200683  |
| O | -0.739543 | -3.158318 | 0.447611  |
| O | 1.136952  | -3.212319 | -0.823153 |
| C | -0.828885 | -4.375479 | -0.312134 |
| C | 0.224516  | -4.128552 | -1.450908 |
| C | -2.257284 | -4.562821 | -0.797140 |
| C | -0.441989 | -5.513682 | 0.630221  |
| C | -0.368169 | -3.416603 | -2.666877 |
| C | 0.993005  | -5.364109 | -1.891638 |
| H | -0.920033 | -2.511853 | -2.369540 |
| H | -1.044826 | -4.071913 | -3.234296 |
| H | 0.448215  | -3.113037 | -3.339297 |
| H | 1.553130  | -5.812889 | -1.060876 |
| H | 1.714353  | -5.090802 | -2.676188 |
| H | 0.310336  | -6.121923 | -2.305663 |
| H | 0.588019  | -5.400392 | 1.000855  |
| H | -0.530832 | -6.495478 | 0.142934  |
| H | -1.117227 | -5.500028 | 1.498838  |
| H | -2.614039 | -3.689330 | -1.357082 |
| H | -2.928601 | -4.705942 | 0.062773  |
| H | -2.332486 | -5.451872 | -1.442289 |
| C | 4.961706  | -0.762852 | 2.460996  |
| C | 6.238966  | -0.741373 | 1.910823  |
| C | 3.899561  | -1.468308 | 1.847070  |
| C | 6.520027  | -1.433835 | 0.728940  |
| C | 4.208639  | -2.172370 | 0.656286  |
| C | 5.491055  | -2.150018 | 0.114177  |
| C | 2.553885  | -1.434529 | 2.401692  |
| C | 1.541910  | -2.396607 | 1.996526  |
| H | 5.683589  | -2.692784 | -0.815534 |
| H | 3.422606  | -2.716514 | 0.125426  |
| H | 7.522271  | -1.413151 | 0.294641  |
| H | 7.030802  | -0.179257 | 2.414597  |
| H | 4.767292  | -0.218005 | 3.390056  |
| P | -2.643975 | -0.464514 | -0.297586 |
| C | -3.119611 | -2.214165 | 1.875959  |
| C | -3.800600 | -3.221313 | 2.555714  |
| C | -3.631699 | -1.668359 | 0.690000  |
| C | -4.999125 | -3.726704 | 2.050704  |
| C | -4.831939 | -2.192531 | 0.188174  |
| C | -5.508257 | -3.211492 | 0.859867  |
| C | -6.073091 | 1.649022  | -1.341944 |
| C | -5.129019 | 0.946454  | -0.596903 |
| C | -3.971898 | 0.438741  | -1.208095 |
| C | -5.870020 | 1.860841  | -2.708360 |
| C | -4.725866 | 1.359696  | -3.325749 |
| C | -3.785682 | 0.646763  | -2.578601 |
| C | -2.358904 | 0.859490  | 2.424404  |
| C | -2.124119 | 0.808320  | 0.920798  |

|    |           |           |           |
|----|-----------|-----------|-----------|
| C  | -1.349690 | 1.871510  | 0.609140  |
| C  | -0.993754 | 0.494469  | 3.071023  |
| C  | -0.124375 | 1.724239  | 2.729881  |
| C  | -1.084409 | 2.644895  | 1.912488  |
| C  | -0.604275 | 4.074072  | 1.772319  |
| C  | -2.433226 | 2.391622  | 2.675140  |
| C  | -2.415470 | 2.788083  | 4.156240  |
| C  | -3.664860 | 3.052903  | 2.058189  |
| C  | -0.860254 | 2.263174  | -0.741716 |
| C  | -1.598475 | 3.097035  | -1.551519 |
| C  | 0.382478  | 1.847681  | -1.374520 |
| S  | -0.826447 | 3.319216  | -3.074597 |
| C  | 0.529870  | 2.342973  | -2.654563 |
| C  | -2.898219 | 3.790465  | -1.289394 |
| C  | 1.637487  | 2.228374  | -3.660930 |
| P  | 1.674116  | 0.985925  | -0.417916 |
| C  | 5.100198  | 0.205892  | -2.592193 |
| C  | 4.199330  | 0.795544  | -1.705846 |
| C  | 4.706932  | -0.877772 | -3.375927 |
| C  | 2.893593  | 0.306556  | -1.604112 |
| C  | 3.410441  | -1.382292 | -3.260808 |
| C  | 2.510885  | -0.799666 | -2.372648 |
| C  | 3.316839  | 4.698074  | 0.399120  |
| C  | 2.608015  | 3.668855  | -0.218772 |
| C  | 3.986895  | 4.465069  | 1.600790  |
| C  | 2.564955  | 2.394968  | 0.360683  |
| C  | 3.946990  | 3.198546  | 2.183018  |
| C  | 3.237093  | 2.169988  | 1.566268  |
| H  | -2.162548 | -1.871212 | 2.266390  |
| H  | -3.380875 | -3.624579 | 3.480633  |
| H  | -5.529177 | -4.522583 | 2.579543  |
| H  | -5.250823 | -1.810770 | -0.745502 |
| H  | -6.440239 | -3.603642 | 0.445226  |
| H  | -6.968991 | 2.041031  | -0.854666 |
| H  | -5.293939 | 0.786884  | 0.471535  |
| H  | -6.607669 | 2.418143  | -3.290809 |
| H  | -4.561158 | 1.522668  | -4.393425 |
| H  | -2.887591 | 0.256445  | -3.065030 |
| H  | -3.212268 | 0.277124  | 2.794291  |
| H  | -0.581965 | -0.431846 | 2.643815  |
| H  | -1.093690 | 0.336702  | 4.154536  |
| H  | 0.763653  | 1.451485  | 2.150048  |
| H  | 0.235606  | 2.246259  | 3.628581  |
| H  | -0.488457 | 4.543069  | 2.762066  |
| H  | -1.304337 | 4.688143  | 1.185587  |
| H  | 0.374807  | 4.114826  | 1.271650  |
| H  | -3.311340 | 2.389940  | 4.659124  |
| H  | -2.446614 | 3.884624  | 4.258161  |
| H  | -1.540357 | 2.432327  | 4.713741  |
| H  | -4.567041 | 2.769666  | 2.623989  |
| H  | -3.825773 | 2.769838  | 1.013692  |
| H  | -3.582621 | 4.150712  | 2.106620  |
| H  | -3.208328 | 4.393913  | -2.154034 |
| H  | -2.818849 | 4.463784  | -0.423506 |
| H  | -3.699754 | 3.071032  | -1.080927 |
| H  | 1.409086  | 2.828178  | -4.553401 |
| H  | 1.789140  | 1.189690  | -3.985457 |
| H  | 2.592056  | 2.589820  | -3.252972 |
| H  | 6.117932  | 0.595947  | -2.665037 |
| H  | 4.522580  | 1.641835  | -1.096953 |
| H  | 5.415050  | -1.337549 | -4.069458 |
| H  | 3.100360  | -2.243392 | -3.857769 |
| H  | 1.508590  | -1.217072 | -2.266813 |
| H  | 3.341239  | 5.689043  | -0.059783 |
| H  | 2.075997  | 3.868010  | -1.151616 |
| H  | 4.536467  | 5.275100  | 2.086252  |
| H  | 4.465998  | 3.009106  | 3.125422  |
| H  | 3.191692  | 1.179569  | 2.024220  |
| Cu | 1.245066  | -0.779241 | 0.886237  |
| H  | 1.902472  | -3.362325 | 1.612451  |
| H  | 0.711689  | -2.535762 | 2.698370  |
| H  | 2.418630  | -0.916095 | 3.355861  |

121

Figure 1\_ts(CuBadd)\_major02\_08 / electronic energy: -4987.93238186 a.u. / lowest freq: -166.41 cm<sup>-1</sup>

|   |           |           |           |
|---|-----------|-----------|-----------|
| B | 0.880801  | -2.686146 | -0.038970 |
| O | -0.194235 | -3.478505 | 0.281255  |
| O | 1.521677  | -3.183748 | -1.166044 |
| C | -0.225072 | -4.617832 | -0.588527 |
| C | 0.633384  | -4.120452 | -1.802510 |
| C | -1.672750 | -4.942938 | -0.921425 |
| C | 0.421479  | -5.777659 | 0.166570  |
| C | -0.186041 | -3.333354 | -2.826367 |
| C | 1.449251  | -5.198418 | -2.496193 |
| H | -0.780875 | -2.545677 | -2.339179 |
| H | -0.862131 | -3.985889 | -3.397670 |
| H | 0.498861  | -2.847093 | -3.537148 |
| H | 2.169378  | -5.666868 | -1.812804 |
| H | 2.011924  | -4.760508 | -3.334331 |
| H | 0.790241  | -5.980425 | -2.903467 |
| H | 1.476858  | -5.567290 | 0.396238  |
| H | 0.368360  | -6.718085 | -0.401472 |
| H | -0.108566 | -5.919834 | 1.120069  |
| H | -2.209287 | -4.055315 | -1.282920 |
| H | -2.189177 | -5.310152 | -0.022113 |
| H | -1.730802 | -5.728982 | -1.689792 |
| C | 4.392118  | 0.399520  | 2.991783  |
| C | 5.656010  | 0.942454  | 2.789547  |

|    |           |           |           |
|----|-----------|-----------|-----------|
| C  | 3.873000  | -0.617930 | 2.155551  |
| C  | 6.470297  | 0.486521  | 1.748718  |
| C  | 4.721814  | -1.076449 | 1.120241  |
| C  | 5.988110  | -0.531606 | 0.923334  |
| C  | 2.524650  | -1.125750 | 2.369013  |
| C  | 2.013620  | -2.339585 | 1.751300  |
| H  | 6.606321  | -0.906707 | 0.102844  |
| H  | 4.374028  | -1.857052 | 0.439554  |
| H  | 7.461642  | 0.915940  | 1.586428  |
| H  | 6.013212  | 1.732114  | 3.457000  |
| H  | 3.773297  | 0.771771  | 3.814333  |
| P  | -2.148616 | -0.798837 | 0.256473  |
| C  | -1.031952 | -1.113519 | 2.813307  |
| C  | -0.771095 | -1.788936 | 4.005610  |
| C  | -1.966577 | -1.605037 | 1.895565  |
| C  | -1.437164 | -2.978373 | 4.295057  |
| C  | -2.616741 | -2.810958 | 2.190074  |
| C  | -2.359362 | -3.488340 | 3.379269  |
| C  | -6.305229 | -1.104228 | 0.445219  |
| C  | -4.969903 | -1.037128 | 0.837098  |
| C  | -3.945414 | -1.018615 | -0.120252 |
| C  | -6.638486 | -1.143707 | -0.910324 |
| C  | -5.629183 | -1.127424 | -1.871547 |
| C  | -4.291216 | -1.072951 | -1.476876 |
| C  | -2.779470 | 1.661434  | 1.902877  |
| C  | -2.196802 | 0.979433  | 0.673360  |
| C  | -1.872767 | 1.946152  | -0.211806 |
| C  | -1.603361 | 2.407597  | 2.592055  |
| C  | -1.286330 | 3.531050  | 1.585953  |
| C  | -2.295643 | 3.292100  | 0.423280  |
| C  | -2.428930 | 4.486838  | -0.499031 |
| C  | -3.559922 | 2.841313  | 1.249506  |
| C  | -4.077074 | 3.891450  | 2.241315  |
| C  | -4.774826 | 2.395667  | 0.436047  |
| C  | -1.286503 | 1.764295  | -1.574378 |
| C  | -2.053807 | 1.934826  | -2.705091 |
| C  | 0.099374  | 1.411457  | -1.900770 |
| S  | -1.120225 | 1.698365  | -4.134124 |
| C  | 0.328732  | 1.362735  | -3.260939 |
| C  | -3.511144 | 2.233444  | -2.864120 |
| C  | 1.540937  | 1.085500  | -4.104076 |
| P  | 1.342272  | 1.022021  | -0.604804 |
| C  | 4.410097  | -0.894653 | -2.554395 |
| C  | 3.193330  | -0.589666 | -1.949163 |
| C  | 5.415164  | 0.068268  | -2.636739 |
| C  | 2.956498  | 0.692258  | -1.435337 |
| C  | 5.199417  | 1.335021  | -2.096344 |
| C  | 3.979263  | 1.645955  | -1.497199 |
| C  | 2.449221  | 3.874497  | 2.102109  |
| C  | 2.138889  | 2.663618  | 1.486199  |
| C  | 2.284307  | 5.072421  | 1.406466  |
| C  | 1.668320  | 2.644643  | 0.170462  |
| C  | 1.821897  | 5.057591  | 0.089045  |
| C  | 1.519071  | 3.846806  | -0.530869 |
| H  | -0.474221 | -0.200772 | 2.588354  |
| H  | -0.036281 | -1.385726 | 4.706845  |
| H  | -1.236063 | -3.509360 | 5.228529  |
| H  | -3.327385 | -3.236592 | 1.477863  |
| H  | -2.878870 | -4.426562 | 3.589807  |
| H  | -7.092215 | -1.115452 | 1.203128  |
| H  | -4.727273 | -0.988990 | 1.901311  |
| H  | -7.686731 | -1.191259 | -1.215221 |
| H  | -5.880786 | -1.163662 | -2.934333 |
| H  | -3.502301 | -1.060741 | -2.234654 |
| H  | -3.359836 | 1.007797  | 2.568868  |
| H  | -0.741935 | 1.749714  | 2.764486  |
| H  | -1.910633 | 2.801013  | 3.571950  |
| H  | -0.259996 | 3.498773  | 1.222721  |
| H  | -1.439389 | 4.530661  | 2.017959  |
| H  | -2.699482 | 5.385413  | 0.077636  |
| H  | -3.197286 | 4.342795  | -1.271499 |
| H  | -1.474813 | 4.697128  | -1.007593 |
| H  | -4.806141 | 3.429649  | 2.926236  |
| H  | -4.603667 | 4.695363  | 1.702383  |
| H  | -3.303994 | 4.364719  | 2.858075  |
| H  | -5.585839 | 2.092070  | 1.116001  |
| H  | -4.571148 | 1.542254  | -0.218766 |
| H  | -5.160193 | 3.226441  | -0.176542 |
| H  | -4.001927 | 2.316050  | -1.892450 |
| H  | -4.019282 | 1.433531  | -3.425071 |
| H  | -3.674062 | 3.175106  | -3.411480 |
| H  | 1.334186  | 1.338426  | -5.153941 |
| H  | 1.822603  | 0.023880  | -4.071354 |
| H  | 2.410737  | 1.673208  | -3.785403 |
| H  | 4.572768  | -1.897627 | -2.956375 |
| H  | 2.428994  | -1.366166 | -1.878158 |
| H  | 6.371403  | -0.171554 | -3.107848 |
| H  | 5.986933  | 2.090991  | -2.134974 |
| H  | 3.836787  | 2.642986  | -1.078740 |
| H  | 2.815357  | 3.881629  | 3.131260  |
| H  | 2.252673  | 1.720249  | 2.025259  |
| H  | 2.515751  | 6.022959  | 1.892814  |
| H  | 1.692439  | 5.995299  | -0.456128 |
| H  | 1.153877  | 3.837698  | -1.560993 |
| Cu | 1.292972  | -0.809153 | 0.707654  |
| H  | 2.749629  | -3.019945 | 1.301017  |
| H  | 1.259006  | -2.883544 | 2.328111  |

H 2.031446 -0.791365 3.287562

121

Figure 1\_L-Cu-alkyl\_major02\_01 / electronic energy: -4988.01015868 a.u. / lowest freq: 10.11 cm-1

|   |           |           |           |
|---|-----------|-----------|-----------|
| B | -3.456763 | -2.149240 | -0.061304 |
| O | -4.288896 | -1.527545 | 0.833345  |
| O | -3.828231 | -1.902597 | -1.361677 |
| C | -5.424493 | -1.018234 | 0.115291  |
| C | -4.871001 | -0.911498 | -1.354942 |
| C | -5.851297 | 0.306081  | 0.726192  |
| C | -6.542019 | -2.050822 | 0.261130  |
| C | -4.210704 | 0.432980  | -1.645583 |
| C | -5.880730 | -1.241077 | -2.443038 |
| H | -3.470941 | 0.681253  | -0.872764 |
| H | -4.945253 | 1.249110  | -1.697671 |
| H | -3.692001 | 0.376913  | -2.613120 |
| H | -6.261965 | -2.266487 | -2.351986 |
| H | -5.406511 | -1.142397 | -3.430958 |
| H | -6.731593 | -0.544082 | -2.406232 |
| H | -6.259060 | -3.016194 | -0.184629 |
| H | -7.475727 | -1.709524 | -0.208753 |
| H | -6.735636 | -2.217724 | 1.330908  |
| H | -5.017345 | 1.016940  | 0.771106  |
| H | -6.215798 | 0.144423  | 1.751353  |
| H | -6.667687 | 0.758174  | 0.142532  |
| C | 0.301117  | -3.120523 | 3.190729  |
| C | 1.273522  | -3.960202 | 3.721698  |
| C | -0.296990 | -3.362695 | 1.928255  |
| C | 1.701442  | -5.093620 | 3.019656  |
| C | 0.150453  | -4.516670 | 1.243459  |
| C | 1.128469  | -5.357215 | 1.775715  |
| C | -1.312082 | -2.446945 | 1.373560  |
| C | -2.267910 | -3.080764 | 0.349274  |
| H | 1.445434  | -6.235413 | 1.205289  |
| H | -0.270918 | -4.755891 | 0.264631  |
| H | 2.463773  | -5.755869 | 3.436948  |
| H | 1.705378  | -3.731410 | 4.700453  |
| H | -0.015857 | -2.240613 | 3.760476  |
| P | -0.910036 | 1.379425  | 0.281927  |
| C | -3.091662 | 3.113262  | 1.004384  |
| C | -4.120006 | 3.505260  | 1.862571  |
| C | -2.294063 | 2.006537  | 1.316035  |
| C | -4.360853 | 2.799809  | 3.040554  |
| C | -2.568594 | 1.280149  | 2.483689  |
| C | -3.584748 | 1.681698  | 3.347505  |
| C | -0.750443 | 4.508685  | -2.406832 |
| C | -0.754819 | 3.774927  | -1.223599 |
| C | -0.934776 | 2.384744  | -1.249685 |
| C | -0.906744 | 3.859828  | -3.633067 |
| C | -1.069253 | 2.476510  | -3.670237 |
| C | -1.085662 | 1.744207  | -2.482905 |
| C | 0.740170  | 2.057880  | 2.643919  |
| C | 0.579230  | 1.972590  | 1.137237  |
| C | 1.808722  | 2.080706  | 0.590764  |
| C | 1.425643  | 0.718977  | 3.038570  |
| C | 2.840233  | 0.884574  | 2.441699  |
| C | 2.795927  | 2.286088  | 1.752131  |
| C | 4.164892  | 2.840454  | 1.418263  |
| C | 1.899257  | 3.082996  | 2.762458  |
| C | 2.487026  | 3.208850  | 4.171667  |
| C | 1.506120  | 4.493614  | 2.317316  |
| C | 2.185222  | 1.893739  | -0.834220 |
| C | 2.588036  | 2.942197  | -1.626492 |
| C | 2.143067  | 0.631759  | -1.561134 |
| S | 2.911783  | 2.407192  | -3.235107 |
| C | 2.522704  | 0.763313  | -2.878144 |
| C | 2.709439  | 4.394692  | -1.292304 |
| C | 2.668107  | -0.247746 | -3.976020 |
| P | 1.648210  | -0.909710 | -0.706209 |
| C | -0.589647 | -2.997041 | -3.422901 |
| C | -0.141154 | -2.081224 | -2.473976 |
| C | 0.268233  | -3.995910 | -3.884591 |
| C | 1.175166  | -2.132479 | -1.994977 |
| C | 1.567873  | -4.077998 | -3.384519 |
| C | 2.020014  | -3.152678 | -2.444318 |
| C | 4.408745  | -3.034679 | 1.440848  |
| C | 3.221443  | -2.527317 | 0.917580  |
| C | 5.636932  | -2.564450 | 0.974452  |
| C | 3.250615  | -1.553546 | -0.087956 |
| C | 5.673195  | -1.589996 | -0.022837 |
| C | 4.485430  | -1.087192 | -0.554207 |
| H | -2.926223 | 3.674222  | 0.083449  |
| H | -4.736493 | 4.369754  | 1.604760  |
| H | -5.163964 | 3.111256  | 3.712536  |
| H | -1.986874 | 0.382204  | 2.709155  |
| H | -3.780715 | 1.108727  | 4.256592  |
| H | -0.612763 | 5.591953  | -2.372390 |
| H | -0.604888 | 4.287149  | -0.270347 |
| H | -0.893543 | 4.434351  | -4.562338 |
| H | -1.180201 | 1.960701  | -4.626636 |
| H | -1.205945 | 0.660528  | -2.521063 |
| H | -0.170418 | 2.294942  | 3.209789  |
| H | 0.884766  | -0.140485 | 2.610382  |
| H | 1.446857  | 0.584698  | 4.129817  |
| H | 3.098378  | 0.103194  | 1.719668  |
| H | 3.619695  | 0.866616  | 3.217457  |
| H | 4.795749  | 2.877777  | 2.320147  |
| H | 4.111889  | 3.856857  | 1.002881  |

|    |           |           |           |
|----|-----------|-----------|-----------|
| H  | 4.678588  | 2.201856  | 0.682258  |
| H  | 1.716902  | 3.577278  | 4.868340  |
| H  | 3.308019  | 3.943219  | 4.177785  |
| H  | 2.881752  | 2.272683  | 4.585719  |
| H  | 0.839176  | 4.951164  | 3.065169  |
| H  | 0.978708  | 4.509072  | 1.355644  |
| H  | 2.393938  | 5.140591  | 2.233261  |
| H  | 2.302655  | 4.591181  | -0.293542 |
| H  | 2.151032  | 5.015079  | -2.009787 |
| H  | 3.758248  | 4.731233  | -1.308659 |
| H  | 3.081936  | 0.216981  | -4.882157 |
| H  | 1.701225  | -0.699494 | -4.242222 |
| H  | 3.344333  | -1.061635 | -3.678925 |
| H  | -1.619203 | -2.941302 | -3.783037 |
| H  | -0.837774 | -1.336819 | -2.076189 |
| H  | -0.082250 | -4.722005 | -4.621801 |
| H  | 2.238567  | -4.868874 | -3.728494 |
| H  | 3.041365  | -3.226633 | -2.064227 |
| H  | 4.368475  | -3.793937 | 2.225054  |
| H  | 2.263632  | -2.882526 | 1.302783  |
| H  | 6.567458  | -2.955719 | 1.392690  |
| H  | 6.631326  | -1.215079 | -0.390663 |
| H  | 4.523857  | -0.317795 | -1.328763 |
| Cu | -0.377947 | -0.871256 | 0.485279  |
| H  | -1.743518 | -3.380640 | -0.573456 |
| H  | -2.716803 | -4.022203 | 0.743545  |
| H  | -1.895844 | -2.015877 | 2.205543  |

121

Figure 1\_L-Cu-alkyl\_major02\_02 / electronic energy: -4988.00339175 a.u. / lowest freq: 16.37 cm<sup>-1</sup>

|   |           |           |           |
|---|-----------|-----------|-----------|
| B | -3.919598 | -0.018109 | -1.084677 |
| O | -3.819820 | -1.320076 | -0.662895 |
| O | -4.682183 | 0.730317  | -0.214026 |
| C | -4.682300 | -1.500906 | 0.469853  |
| C | -4.836101 | -0.030713 | 0.994564  |
| C | -4.035831 | -2.459648 | 1.455599  |
| C | -5.992639 | -2.088905 | -0.051389 |
| C | -3.691282 | 0.386110  | 1.916761  |
| C | -6.177975 | 0.285599  | 1.631743  |
| H | -2.721882 | 0.184145  | 1.436452  |
| H | -3.724609 | -0.134476 | 2.884631  |
| H | -3.754902 | 1.468033  | 2.102067  |
| H | -7.005083 | 0.149479  | 0.922691  |
| H | -6.193141 | 1.331105  | 1.973895  |
| H | -6.352914 | -0.360757 | 2.505138  |
| H | -6.498373 | -1.396420 | -0.740715 |
| H | -6.683535 | -2.334701 | 0.768209  |
| H | -5.769975 | -3.013998 | -0.603616 |
| H | -3.005298 | -2.164465 | 1.690846  |
| H | -4.006251 | -3.472263 | 1.028721  |
| H | -4.613282 | -2.500758 | 2.391978  |
| C | -1.279684 | 3.663200  | -2.690340 |
| C | -1.311883 | 5.025675  | -2.395272 |
| C | -1.979975 | 2.706972  | -1.922394 |
| C | -2.078763 | 5.501309  | -1.331804 |
| C | -2.759713 | 3.219139  | -0.859739 |
| C | -2.809515 | 4.580693  | -0.575880 |
| C | -1.881692 | 1.253141  | -2.223693 |
| C | -3.249670 | 0.524729  | -2.394793 |
| H | -3.425119 | 4.928840  | 0.258797  |
| H | -3.344102 | 2.527838  | -0.251013 |
| H | -2.112173 | 6.568546  | -1.099056 |
| H | -0.741375 | 5.723140  | -3.015839 |
| H | -0.698943 | 3.321840  | -3.553235 |
| P | -0.248350 | -1.737061 | -0.156662 |
| C | -1.449996 | -2.748363 | -2.421900 |
| C | -2.193720 | -3.633156 | -3.195870 |
| C | -1.166845 | -3.031215 | -1.078267 |
| C | -2.693133 | -4.806890 | -2.628189 |
| C | -1.671419 | -4.207058 | -0.517410 |
| C | -2.434032 | -5.087256 | -1.288347 |
| C | 0.777185  | -4.040004 | 3.114264  |
| C | 0.584033  | -3.606108 | 1.805618  |
| C | -0.047147 | -2.381199 | 1.548047  |
| C | 0.356889  | -3.247122 | 4.184259  |
| C | -0.266059 | -2.025422 | 3.939088  |
| C | -0.469339 | -1.599200 | 2.626417  |
| C | 1.837647  | -2.272507 | -2.214015 |
| C | 1.451819  | -1.865327 | -0.802533 |
| C | 2.559877  | -1.371082 | -0.209721 |
| C | 2.080964  | -0.928747 | -2.959318 |
| C | 3.379303  | -0.415533 | -2.298667 |
| C | 3.709072  | -1.502416 | -1.229697 |
| C | 5.127998  | -1.414941 | -0.707000 |
| C | 3.279557  | -2.802573 | -1.992192 |
| C | 4.054364  | -3.070550 | -3.286607 |
| C | 3.337296  | -4.090796 | -1.169093 |
| C | 2.689783  | -0.701945 | 1.111867  |
| C | 3.365022  | -1.283749 | 2.158320  |
| C | 2.185584  | 0.626491  | 1.447844  |
| S | 3.416628  | -0.228744 | 3.523681  |
| C | 2.542375  | 1.025198  | 2.718278  |
| C | 3.987968  | -2.639746 | 2.261239  |
| C | 2.335804  | 2.312208  | 3.460512  |
| P | 1.133600  | 1.557200  | 0.268349  |
| C | -1.417530 | 3.384584  | 2.907222  |
| C | -0.702440 | 2.447069  | 2.167614  |
| C | -1.183795 | 4.747465  | 2.719271  |

|    |           |           |           |
|----|-----------|-----------|-----------|
| C  | 0.271887  | 2.853272  | 1.246766  |
| C  | -0.239098 | 5.160610  | 1.782173  |
| C  | 0.482345  | 4.220899  | 1.045643  |
| C  | 2.863774  | 3.568628  | -2.838581 |
| C  | 1.986309  | 2.847034  | -2.031793 |
| C  | 4.108434  | 3.953866  | -2.340635 |
| C  | 2.338423  | 2.516525  | -0.719495 |
| C  | 4.469700  | 3.620412  | -1.033874 |
| C  | 3.588290  | 2.905949  | -0.224037 |
| H  | -1.098869 | -1.811031 | -2.862764 |
| H  | -2.400397 | -3.396979 | -4.242349 |
| H  | -3.290808 | -5.496247 | -3.229291 |
| H  | -1.494109 | -4.441099 | 0.533365  |
| H  | -2.830283 | -5.997798 | -0.832326 |
| H  | 1.269425  | -4.997351 | 3.300487  |
| H  | 0.933892  | -4.224194 | 0.975692  |
| H  | 0.518930  | -3.583142 | 5.211159  |
| H  | -0.592540 | -1.396350 | 4.770278  |
| H  | -0.956801 | -0.641697 | 2.440710  |
| H  | 1.151237  | -2.962099 | -2.720922 |
| H  | 1.232693  | -0.240341 | -2.821143 |
| H  | 2.200383  | -1.088357 | -4.040660 |
| H  | 3.270001  | 0.567285  | -1.830864 |
| H  | 4.202968  | -0.332237 | -3.023141 |
| H  | 5.846081  | -1.447520 | -1.541350 |
| H  | 5.374318  | -2.238124 | -0.021890 |
| H  | 5.291799  | -0.467629 | -0.169257 |
| H  | 3.576393  | -3.892201 | -3.843625 |
| H  | 5.083985  | -3.388339 | -3.057366 |
| H  | 4.118840  | -2.210060 | -3.964000 |
| H  | 2.950337  | -4.935015 | -1.761339 |
| H  | 2.747884  | -4.041165 | -0.246002 |
| H  | 4.377504  | -4.332682 | -0.898092 |
| H  | 3.587624  | -3.192027 | 3.124852  |
| H  | 5.080786  | -2.577917 | 2.384821  |
| H  | 3.776195  | -3.228404 | 1.361792  |
| H  | 3.089119  | 2.422759  | 4.253858  |
| H  | 1.343502  | 2.362435  | 3.933834  |
| H  | 2.424654  | 3.176218  | 2.790261  |
| H  | -2.162435 | 3.048852  | 3.632310  |
| H  | -0.891295 | 1.383832  | 2.325425  |
| H  | -1.745933 | 5.485583  | 3.295993  |
| H  | -0.062151 | 6.225437  | 1.614587  |
| H  | 1.217767  | 4.564282  | 0.315693  |
| H  | 2.578975  | 3.819140  | -3.863135 |
| H  | 1.022194  | 2.519458  | -2.423775 |
| H  | 4.802078  | 4.512638  | -2.973400 |
| H  | 5.445567  | 3.917812  | -0.642801 |
| H  | 3.879791  | 2.640574  | 0.795323  |
| Cu | -0.635986 | 0.461300  | -0.816590 |
| H  | -3.972195 | 1.166924  | -2.940726 |
| H  | -3.085466 | -0.355768 | -3.038347 |
| H  | -1.348583 | 1.163986  | -3.188645 |

121

Figure 1\_pcl\_minor01\_01 / electronic energy: -4987.94988378 a.u. / lowest freq: 16.56 cm-1

|   |           |           |           |
|---|-----------|-----------|-----------|
| B | -3.113030 | 0.177224  | -1.612038 |
| O | -4.335610 | -0.238872 | -1.093727 |
| O | -3.340308 | 1.165973  | -2.563035 |
| C | -5.408647 | 0.364126  | -1.827755 |
| C | -4.703570 | 1.604550  | -2.476580 |
| C | -6.539488 | 0.702773  | -0.867440 |
| C | -5.887160 | -0.659001 | -2.858422 |
| C | -4.721287 | 2.839805  | -1.573931 |
| C | -5.203451 | 1.973077  | -3.865438 |
| H | -4.378684 | 2.592302  | -0.558333 |
| H | -5.724427 | 3.286469  | -1.504218 |
| H | -4.037569 | 3.596244  | -1.987459 |
| H | -5.044574 | 1.158615  | -4.584603 |
| H | -4.662546 | 2.857797  | -4.234112 |
| H | -6.276900 | 2.217579  | -3.843945 |
| H | -5.088826 | -0.908176 | -3.573311 |
| H | -6.761753 | -0.299047 | -3.420523 |
| H | -6.173291 | -1.584874 | -2.337033 |
| H | -6.183672 | 1.311851  | -0.026460 |
| H | -6.964802 | -0.223014 | -0.451031 |
| H | -7.347050 | 1.245630  | -1.383192 |
| C | -0.317467 | -4.503284 | 0.232466  |
| C | -0.832879 | -5.379088 | 1.184829  |
| C | -1.145802 | -3.594473 | -0.447772 |
| C | -2.195996 | -5.373087 | 1.483122  |
| C | -2.522027 | -3.607527 | -0.143650 |
| C | -3.035517 | -4.483596 | 0.810119  |
| C | -0.572662 | -2.641844 | -1.418047 |
| C | -1.305680 | -2.078527 | -2.462140 |
| H | -4.104961 | -4.462862 | 1.035469  |
| H | -3.194627 | -2.898153 | -0.634566 |
| H | -2.600364 | -6.055893 | 2.234009  |
| H | -0.161988 | -6.069009 | 1.702907  |
| H | 0.753175  | -4.518158 | 0.013513  |
| P | -1.023871 | -0.058603 | 1.205868  |
| C | 0.729334  | -2.006782 | 2.086237  |
| C | 1.435812  | -2.769687 | 3.014196  |
| C | -0.269950 | -1.124622 | 2.499295  |
| C | 1.134550  | -2.661013 | 4.370681  |
| C | -0.570238 | -1.021107 | 3.863754  |
| C | 0.128230  | -1.788996 | 4.793182  |
| C | -4.458329 | 1.915873  | 2.365145  |



|    |           |           |           |
|----|-----------|-----------|-----------|
| C  | -3.159512 | 1.656643  | 1.925744  |
| C  | -2.663484 | 0.350412  | 1.912366  |
| C  | -5.277348 | 0.869406  | 2.785599  |
| C  | -4.793136 | -0.439637 | 2.760687  |
| C  | -3.497051 | -0.698220 | 2.322839  |
| C  | 0.143456  | 2.281251  | 2.629185  |
| C  | -0.022909 | 1.440630  | 1.370860  |
| C  | 0.872106  | 1.889782  | 0.466435  |
| C  | 1.515742  | 1.857743  | 3.227397  |
| C  | 2.519017  | 2.421146  | 2.198104  |
| C  | 1.607741  | 3.075129  | 1.112278  |
| C  | 2.321536  | 4.016943  | 0.165744  |
| C  | 0.472395  | 3.673293  | 2.019431  |
| C  | 0.954086  | 4.710370  | 3.040029  |
| C  | -0.679095 | 4.322738  | 1.251006  |
| C  | 1.146259  | 1.373268  | -0.901227 |
| C  | 0.414896  | 1.829350  | -1.973900 |
| C  | 2.184293  | 0.429514  | -1.290634 |
| S  | 0.961993  | 1.103780  | -3.438342 |
| C  | 2.194021  | 0.188586  | -2.649460 |
| C  | -0.693571 | 2.834105  | -1.998116 |
| C  | 3.083384  | -0.671924 | -3.496658 |
| P  | 3.357596  | -0.231802 | -0.042364 |
| C  | 3.638736  | -4.150834 | -1.229849 |
| C  | 3.205876  | -2.927009 | -0.724082 |
| C  | 4.923255  | -4.268847 | -1.760853 |
| C  | 4.026677  | -1.792323 | -0.766099 |
| C  | 5.764184  | -3.156124 | -1.775329 |
| C  | 5.320956  | -1.928309 | -1.283532 |
| C  | 6.879082  | 1.696970  | 0.754794  |
| C  | 5.760022  | 0.868270  | 0.800441  |
| C  | 7.045504  | 2.586186  | -0.308072 |
| C  | 4.800676  | 0.901511  | -0.222506 |
| C  | 6.092771  | 2.634576  | -1.324951 |
| C  | 4.978248  | 1.795025  | -1.284897 |
| H  | 0.946753  | -2.088393 | 1.020945  |
| H  | 2.217354  | -3.453387 | 2.674313  |
| H  | 1.682586  | -3.258844 | 5.102862  |
| H  | -1.345840 | -0.331949 | 4.206028  |
| H  | -0.108507 | -1.700682 | 5.856118  |
| H  | -4.831386 | 2.942824  | 2.372493  |
| H  | -2.534424 | 2.482629  | 1.584975  |
| H  | -6.295638 | 1.071405  | 3.126033  |
| H  | -5.432228 | -1.266972 | 3.078043  |
| H  | -3.133619 | -1.729441 | 2.294797  |
| H  | -0.694054 | 2.243718  | 3.339632  |
| H  | 1.587901  | 0.766814  | 3.328376  |
| H  | 1.659292  | 2.290368  | 4.228125  |
| H  | 3.156373  | 1.642135  | 1.767983  |
| H  | 3.188955  | 3.178704  | 2.631038  |
| H  | 2.763394  | 4.861415  | 0.717232  |
| H  | 1.637549  | 4.426428  | -0.593565 |
| H  | 3.140011  | 3.503874  | -0.360676 |
| H  | 0.132554  | 4.963739  | 3.728979  |
| H  | 1.246554  | 5.641131  | 2.528519  |
| H  | 1.806358  | 4.391540  | 3.652175  |
| H  | -1.476099 | 4.628263  | 1.947301  |
| H  | -1.119802 | 3.662403  | 0.497998  |
| H  | -0.332620 | 5.233406  | 0.736951  |
| H  | -1.487095 | 2.544726  | -1.297487 |
| H  | -1.157310 | 2.896128  | -2.990427 |
| H  | -0.323688 | 3.834232  | -1.724003 |
| H  | 2.898930  | -0.488090 | -4.564755 |
| H  | 2.914822  | -1.742937 | -3.308691 |
| H  | 4.143621  | -0.463509 | -3.298595 |
| H  | 2.970809  | -5.015428 | -1.202324 |
| H  | 2.206805  | -2.852449 | -0.293514 |
| H  | 5.271152  | -5.226440 | -2.155160 |
| H  | 6.774728  | -3.240451 | -2.182401 |
| H  | 5.991395  | -1.067031 | -1.322113 |
| H  | 7.619554  | 1.656503  | 1.557125  |
| H  | 5.628529  | 0.184123  | 1.644439  |
| H  | 7.915895  | 3.246021  | -0.340056 |
| H  | 6.214357  | 3.332807  | -2.156583 |
| H  | 4.236601  | 1.844607  | -2.085525 |
| Cu | -1.430553 | -0.761906 | -0.930391 |
| H  | -2.305733 | -2.442939 | -2.713544 |
| H  | -0.777842 | -1.564856 | -3.271787 |
| H  | 0.517159  | -2.558634 | -1.439575 |

121

Figure 1\_pcl\_minor01\_02 / electronic energy: -4987.95193410 a.u. / lowest freq: 12.40 cm-1

|   |           |           |           |
|---|-----------|-----------|-----------|
| B | -3.268968 | 0.265179  | -1.663715 |
| O | -4.570821 | -0.037402 | -1.262075 |
| O | -3.334033 | 1.131320  | -2.753753 |
| C | -5.505898 | 0.467419  | -2.225059 |
| C | -4.678317 | 1.604674  | -2.912340 |
| C | -6.762854 | 0.934258  | -1.505872 |
| C | -5.845596 | -0.681156 | -3.176154 |
| C | -4.780384 | 2.942655  | -2.176740 |
| C | -4.969933 | 1.804274  | -4.391779 |
| H | -4.581614 | 2.822783  | -1.100975 |
| H | -5.771348 | 3.404978  | -2.299160 |
| H | -4.029124 | 3.636951  | -2.582080 |
| H | -4.742379 | 0.901590  | -4.974008 |
| H | -4.352133 | 2.624385  | -4.787702 |
| H | -6.026907 | 2.067379  | -4.552546 |
| H | -4.952117 | -1.027429 | -3.716911 |

|   |           |           |           |
|---|-----------|-----------|-----------|
| H | -6.610561 | -0.392961 | -3.912292 |
| H | -6.234279 | -1.527789 | -2.590681 |
| H | -6.529714 | 1.646766  | -0.703816 |
| H | -7.273665 | 0.072371  | -1.050688 |
| H | -7.464054 | 1.412171  | -2.207466 |
| C | -0.185549 | -4.441889 | 0.113402  |
| C | -0.676603 | -5.527970 | 0.833452  |
| C | -1.053185 | -3.501247 | -0.463227 |
| C | -2.050641 | -5.695405 | 1.006691  |
| C | -2.436380 | -3.676146 | -0.271030 |
| C | -2.926482 | -4.758806 | 0.456149  |
| C | -0.516072 | -2.379617 | -1.261192 |
| C | -1.195544 | -1.843624 | -2.344473 |
| H | -4.004684 | -4.870249 | 0.595620  |
| H | -3.137467 | -2.946657 | -0.686186 |
| H | -2.436726 | -6.545976 | 1.573332  |
| H | 0.022654  | -6.248027 | 1.265825  |
| H | 0.891840  | -4.324678 | -0.015112 |
| P | -1.046098 | -0.140170 | 1.408639  |
| C | 0.998461  | -1.781539 | 2.403930  |
| C | 1.515647  | -2.901031 | 3.056008  |
| C | -0.381679 | -1.552566 | 2.371600  |
| C | 0.657820  | -3.805146 | 3.680868  |
| C | -1.240342 | -2.484482 | 2.969942  |
| C | -0.720822 | -3.596659 | 3.629544  |
| C | -3.510330 | 0.958584  | 4.561944  |
| C | -2.477671 | 0.374783  | 3.831211  |
| C | -2.443336 | 0.486811  | 2.433477  |
| C | -4.518861 | 1.668884  | 3.908392  |
| C | -4.493220 | 1.785028  | 2.520025  |
| C | -3.464738 | 1.191666  | 1.787429  |
| C | 0.372112  | 1.991651  | 2.940310  |
| C | 0.148568  | 1.207665  | 1.651473  |
| C | 0.914565  | 1.780692  | 0.700550  |
| C | 1.818420  | 1.672921  | 3.402385  |
| C | 2.675318  | 2.357994  | 2.316400  |
| C | 1.619283  | 2.982280  | 1.351813  |
| C | 2.179997  | 4.022425  | 0.404327  |
| C | 0.518446  | 3.434320  | 2.381838  |
| C | 0.996393  | 4.471214  | 3.403591  |
| C | -0.774222 | 3.980144  | 1.773697  |
| C | 1.084817  | 1.388936  | -0.721868 |
| C | 0.268321  | 1.892561  | -1.708823 |
| C | 2.127943  | 0.521775  | -1.242144 |
| S | 0.751072  | 1.298493  | -3.255274 |
| C | 2.054267  | 0.369566  | -2.611179 |
| C | -0.877194 | 2.848125  | -1.594760 |
| C | 2.906904  | -0.426527 | -3.551652 |
| P | 3.435577  | -0.115350 | -0.125397 |
| C | 3.628743  | -4.066259 | -1.162433 |
| C | 3.246378  | -2.824740 | -0.657806 |
| C | 4.825217  | -4.191765 | -1.868940 |
| C | 4.030387  | -1.684952 | -0.880892 |
| C | 5.632079  | -3.070430 | -2.064062 |
| C | 5.237907  | -1.825142 | -1.575494 |
| C | 6.994678  | 1.865420  | 0.288031  |
| C | 5.912228  | 1.001028  | 0.437705  |
| C | 7.004462  | 2.798612  | -0.749913 |
| C | 4.830636  | 1.043046  | -0.455505 |
| C | 5.930065  | 2.856496  | -1.636286 |
| C | 4.850572  | 1.983354  | -1.492017 |
| H | 1.680816  | -1.081279 | 1.913886  |
| H | 2.596286  | -3.062228 | 3.074119  |
| H | 1.061891  | -4.680248 | 4.195105  |
| H | -2.322922 | -2.342050 | 2.927658  |
| H | -1.401749 | -4.311917 | 4.096384  |
| H | -3.524928 | 0.860150  | 5.649934  |
| H | -1.690807 | -0.167837 | 4.359855  |
| H | -5.326892 | 2.127910  | 4.483068  |
| H | -5.282832 | 2.331963  | 1.999427  |
| H | -3.462274 | 1.260095  | 0.697754  |
| H | -0.392483 | 1.859475  | 3.715228  |
| H | 1.992451  | 0.591025  | 3.467833  |
| H | 2.006247  | 2.093311  | 4.401010  |
| H | 3.328142  | 1.655796  | 1.786752  |
| H | 3.322167  | 3.147158  | 2.727301  |
| H | 2.600791  | 4.870780  | 0.966402  |
| H | 1.411016  | 4.414074  | -0.278821 |
| H | 2.990100  | 3.600109  | -0.209591 |
| H | 0.250322  | 4.573287  | 4.207891  |
| H | 1.094521  | 5.458485  | 2.924795  |
| H | 1.959212  | 4.240780  | 3.875582  |
| H | -1.491494 | 4.219164  | 2.574927  |
| H | -1.265383 | 3.273561  | 1.097310  |
| H | -0.583743 | 4.911380  | 1.216405  |
| H | -1.544868 | 2.541759  | -0.779766 |
| H | -1.482542 | 2.848761  | -2.509282 |
| H | -0.527107 | 3.873295  | -1.394722 |
| H | 2.647176  | -0.211317 | -4.597868 |
| H | 2.778846  | -1.507559 | -3.389004 |
| H | 3.971939  | -0.193166 | -3.414703 |
| H | 2.996895  | -4.941247 | -0.990421 |
| H | 2.325515  | -2.738672 | -0.075019 |
| H | 5.133655  | -5.164490 | -2.259193 |
| H | 6.576040  | -3.163789 | -2.606373 |
| H | 5.874259  | -0.954883 | -1.751707 |
| H | 7.828046  | 1.818638  | 0.993077  |

|    |           |           |           |
|----|-----------|-----------|-----------|
| H  | 5.905348  | 0.282755  | 1.263209  |
| H  | 7.845948  | 3.486401  | -0.862094 |
| H  | 5.927698  | 3.588917  | -2.447056 |
| H  | 4.014143  | 2.045279  | -2.191618 |
| Cu | -1.641201 | -0.598926 | -0.772993 |
| H  | -2.112982 | -2.303924 | -2.722169 |
| H  | -0.668358 | -1.193166 | -3.048000 |
| H  | 0.544623  | -2.146582 | -1.132158 |

121

Figure 1\_pcl\_minor01\_03 / electronic energy: -4987.95470336 a.u. / lowest freq: 27.07 cm-1

|   |           |           |           |
|---|-----------|-----------|-----------|
| B | -3.564333 | 0.051732  | -1.050160 |
| O | -4.746168 | -0.664252 | -0.874788 |
| O | -3.884646 | 1.345258  | -1.453115 |
| C | -5.845798 | 0.073935  | -1.424983 |
| C | -5.304268 | 1.545757  | -1.400614 |
| C | -7.085591 | -0.165160 | -0.575634 |
| C | -6.074806 | -0.455462 | -2.841957 |
| C | -5.620683 | 2.282827  | -0.099723 |
| C | -5.724890 | 2.403306  | -2.586198 |
| H | -5.343157 | 1.684442  | 0.779262  |
| H | -6.689016 | 2.532935  | -0.022285 |
| H | -5.046198 | 3.220444  | -0.068604 |
| H | -5.366393 | 1.987254  | -3.536896 |
| H | -5.300239 | 3.413329  | -2.481774 |
| H | -6.820495 | 2.500046  | -2.635563 |
| H | -5.191937 | -0.286563 | -3.476403 |
| H | -6.946438 | 0.012584  | -3.323191 |
| H | -6.251136 | -1.540323 | -2.792479 |
| H | -6.896619 | 0.048320  | 0.484865  |
| H | -7.395110 | -1.218096 | -0.656189 |
| H | -7.924170 | 0.461254  | -0.917093 |
| C | 0.552731  | -4.232502 | -1.357412 |
| C | 0.556949  | -5.500319 | -0.780973 |
| C | -0.634584 | -3.493084 | -1.479025 |
| C | -0.628863 | -6.060353 | -0.303865 |
| C | -1.826548 | -4.077028 | -1.010284 |
| C | -1.820088 | -5.341202 | -0.425547 |
| C | -0.597462 | -2.146766 | -2.076650 |
| C | -1.684938 | -1.567242 | -2.722866 |
| H | -2.755430 | -5.767531 | -0.054223 |
| H | -2.768206 | -3.526251 | -1.080446 |
| H | -0.626625 | -7.050392 | 0.157820  |
| H | 1.496217  | -6.053415 | -0.697708 |
| H | 1.486002  | -3.798495 | -1.724386 |
| P | -0.774447 | -0.441639 | 1.226396  |
| C | 0.268283  | -2.936522 | 1.820327  |
| C | 1.145465  | -3.849512 | 2.403464  |
| C | 0.466974  | -1.558361 | 1.980456  |
| C | 2.240240  | -3.396233 | 3.139019  |
| C | 1.557185  | -1.113649 | 2.734306  |
| C | 2.444329  | -2.026561 | 3.302445  |
| C | -4.222697 | 0.453558  | 3.271319  |
| C | -3.233421 | 0.338548  | 2.298704  |
| C | -2.061193 | -0.387019 | 2.548306  |
| C | -4.062634 | -0.172753 | 4.508297  |
| C | -2.904706 | -0.904777 | 4.763596  |
| C | -1.907546 | -1.009730 | 3.791929  |
| C | -0.364615 | 2.307246  | 2.351058  |
| C | -0.159099 | 1.272305  | 1.250019  |
| C | 0.395769  | 1.918972  | 0.201413  |
| C | 1.047314  | 2.691811  | 2.870545  |
| C | 1.667536  | 3.419732  | 1.660656  |
| C | 0.527821  | 3.397626  | 0.595534  |
| C | 0.727673  | 4.394325  | -0.526961 |
| C | -0.742692 | 3.558588  | 1.508092  |
| C | -0.791318 | 4.871324  | 2.296956  |
| C | -2.086858 | 3.425803  | 0.788181  |
| C | 0.890532  | 1.362191  | -1.082407 |
| C | 0.227189  | 1.515356  | -2.278479 |
| C | 2.158152  | 0.665617  | -1.231238 |
| S | 1.120210  | 0.784666  | -3.565933 |
| C | 2.409637  | 0.286681  | -2.532123 |
| C | -1.055956 | 2.217438  | -2.587451 |
| C | 3.585113  | -0.425298 | -3.128164 |
| P | 3.311890  | 0.503294  | 0.181379  |
| C | 6.134858  | -2.484186 | -0.457543 |
| C | 5.551576  | -1.225365 | -0.309097 |
| C | 5.346133  | -3.633642 | -0.430526 |
| C | 4.168715  | -1.096809 | -0.133940 |
| C | 3.967427  | -3.515306 | -0.249855 |
| C | 3.384760  | -2.259122 | -0.096973 |
| C | 5.592191  | 3.556014  | -1.502399 |
| C | 4.619737  | 2.567207  | -1.342324 |
| C | 6.561476  | 3.755766  | -0.520759 |
| C | 4.600419  | 1.766716  | -0.193918 |
| C | 6.547465  | 2.969451  | 0.632460  |
| C | 5.566470  | 1.994502  | 0.799583  |
| H | -0.581256 | -3.303791 | 1.240056  |
| H | 0.975329  | -4.919929 | 2.268668  |
| H | 2.937979  | -4.111353 | 3.581112  |
| H | 1.722351  | -0.047185 | 2.874186  |
| H | 3.300571  | -1.662635 | 3.874864  |
| H | -5.126941 | 1.029396  | 3.058080  |
| H | -3.365698 | 0.827060  | 1.332288  |
| H | -4.840380 | -0.091386 | 5.271334  |
| H | -2.769700 | -1.399222 | 5.728491  |
| H | -1.003999 | -1.579537 | 4.017045  |

|    |           |           |           |
|----|-----------|-----------|-----------|
| H  | -1.075755 | 2.023633  | 3.137569  |
| H  | 1.628696  | 1.814969  | 3.180397  |
| H  | 0.967481  | 3.347750  | 3.749310  |
| H  | 2.572331  | 2.928520  | 1.280624  |
| H  | 1.944098  | 4.458385  | 1.895448  |
| H  | 0.822762  | 5.412627  | -0.118779 |
| H  | -0.109830 | 4.391877  | -1.238796 |
| H  | 1.650121  | 4.177764  | -1.088795 |
| H  | -1.567827 | 4.811896  | 3.076405  |
| H  | -1.065275 | 5.703849  | 1.629707  |
| H  | 0.150173  | 5.144564  | 2.789213  |
| H  | -2.906710 | 3.509951  | 1.519050  |
| H  | -2.218759 | 2.475946  | 0.257263  |
| H  | -2.219767 | 4.239838  | 0.057239  |
| H  | -1.605637 | 2.448099  | -1.670168 |
| H  | -1.722982 | 1.597223  | -3.202519 |
| H  | -0.871601 | 3.156030  | -3.135186 |
| H  | 3.598842  | -0.318634 | -4.222176 |
| H  | 3.565062  | -1.500859 | -2.892573 |
| H  | 4.527533  | -0.019076 | -2.735592 |
| H  | 7.215157  | -2.564388 | -0.601319 |
| H  | 6.185995  | -0.336988 | -0.346104 |
| H  | 5.804421  | -4.618475 | -0.547549 |
| H  | 3.337275  | -4.407322 | -0.218193 |
| H  | 2.303755  | -2.184002 | 0.051140  |
| H  | 5.590670  | 4.172281  | -2.404843 |
| H  | 3.867746  | 2.424141  | -2.121387 |
| H  | 7.323185  | 4.528513  | -0.648803 |
| H  | 7.297096  | 3.124382  | 1.412180  |
| H  | 5.550051  | 1.400014  | 1.718294  |
| Cu | -1.711968 | -0.799730 | -0.840945 |
| H  | -2.606404 | -2.130463 | -2.897563 |
| H  | -1.522381 | -0.721745 | -3.396776 |
| H  | 0.398242  | -1.717130 | -2.228493 |

121

Figure 1\_pcl\_minor01\_04 / electronic energy: -4987.95276732 a.u. / lowest freq: 16.33 cm-1

|   |           |           |           |
|---|-----------|-----------|-----------|
| B | -2.842609 | 1.042824  | -0.194489 |
| O | -3.713008 | 0.310657  | 0.620661  |
| O | -3.448463 | 2.251762  | -0.510663 |
| C | -5.002051 | 0.937120  | 0.632115  |
| C | -4.639218 | 2.416743  | 0.272600  |
| C | -5.641295 | 0.745454  | 1.999054  |
| C | -5.848464 | 0.251934  | -0.442539 |
| C | -4.271553 | 3.252523  | 1.499256  |
| C | -5.684840 | 3.149178  | -0.554990 |
| H | -3.516757 | 2.742625  | 2.116683  |
| H | -5.149299 | 3.469121  | 2.126168  |
| H | -3.845283 | 4.208118  | 1.162251  |
| H | -5.855407 | 2.657711  | -1.521849 |
| H | -5.346673 | 4.176961  | -0.756064 |
| H | -6.643309 | 3.207551  | -0.016111 |
| H | -5.407668 | 0.387787  | -1.441735 |
| H | -6.879465 | 0.635609  | -0.462332 |
| H | -5.888923 | -0.827876 | -0.234140 |
| H | -4.976446 | 1.080740  | 2.805998  |
| H | -5.856836 | -0.321159 | 2.164076  |
| H | -6.590815 | 1.298234  | 2.071499  |
| C | -0.939154 | -3.311566 | -2.963513 |
| C | -1.465933 | -4.587458 | -2.784073 |
| C | -1.716073 | -2.162049 | -2.730212 |
| C | -2.791740 | -4.752932 | -2.377783 |
| C | -3.050188 | -2.346232 | -2.321859 |
| C | -3.578796 | -3.623460 | -2.154675 |
| C | -1.120719 | -0.824219 | -2.890108 |
| C | -1.850473 | 0.358923  | -2.845733 |
| H | -4.615827 | -3.736512 | -1.828290 |
| H | -3.677164 | -1.479878 | -2.101639 |
| H | -3.206132 | -5.753259 | -2.232905 |
| H | -0.836006 | -5.462315 | -2.964849 |
| H | 0.099028  | -3.193844 | -3.284078 |
| P | -0.211085 | -1.308498 | 0.608057  |
| C | -2.476679 | -2.820097 | 0.989786  |
| C | -3.225007 | -3.953279 | 1.303791  |
| C | -1.077708 | -2.891573 | 0.932589  |
| C | -2.590406 | -5.171726 | 1.542337  |
| C | -0.444880 | -4.113171 | 1.193014  |
| C | -1.198940 | -5.249161 | 1.486064  |
| C | -0.561251 | 1.213212  | 3.840385  |
| C | -0.647738 | 0.651731  | 2.565907  |
| C | -0.134023 | -0.619769 | 2.314864  |
| C | 0.026780  | 0.493898  | 4.878518  |
| C | 0.515963  | -0.793284 | 4.641530  |
| C | 0.436930  | -1.347298 | 3.366836  |
| C | 1.981851  | -2.780668 | -0.710950 |
| C | 1.518969  | -1.716077 | 0.273221  |
| C | 2.607130  | -0.989016 | 0.607178  |
| C | 2.357892  | -1.997064 | -2.001616 |
| C | 3.634799  | -1.242152 | -1.585818 |
| C | 3.820127  | -1.641135 | -0.092076 |
| C | 5.204177  | -1.332648 | 0.441707  |
| C | 3.371564  | -3.143303 | -0.122059 |
| C | 4.216959  | -4.044388 | -1.027552 |
| C | 3.316924  | -3.816316 | 1.252118  |
| C | 2.711317  | 0.314965  | 1.309591  |
| C | 3.373537  | 0.448241  | 2.504515  |
| C | 2.292322  | 1.600332  | 0.754398  |
| S | 3.551614  | 2.113755  | 2.929419  |

|    |           |           |           |
|----|-----------|-----------|-----------|
| C  | 2.743181  | 2.667399  | 1.502557  |
| C  | 3.893879  | -0.611281 | 3.422557  |
| C  | 2.697037  | 4.147429  | 1.266019  |
| P  | 1.170915  | 1.677862  | -0.701778 |
| C  | -1.057630 | 4.851140  | 0.719125  |
| C  | -0.304407 | 3.684043  | 0.640349  |
| C  | -1.261226 | 5.637613  | -0.415392 |
| C  | 0.289294  | 3.291585  | -0.567254 |
| C  | -0.698034 | 5.243589  | -1.626944 |
| C  | 0.073495  | 4.082898  | -1.702208 |
| C  | 2.723703  | 1.712213  | -4.497153 |
| C  | 1.886733  | 1.569563  | -3.390790 |
| C  | 4.001687  | 2.246794  | -4.339143 |
| C  | 2.311829  | 1.965936  | -2.116330 |
| C  | 4.434694  | 2.645686  | -3.073763 |
| C  | 3.595444  | 2.507307  | -1.969621 |
| H  | -2.981922 | -1.867066 | 0.800992  |
| H  | -4.314548 | -3.883375 | 1.351013  |
| H  | -3.179192 | -6.061991 | 1.776758  |
| H  | 0.642822  | -4.185634 | 1.182010  |
| H  | -0.693012 | -6.198086 | 1.679526  |
| H  | -0.958066 | 2.215595  | 4.020029  |
| H  | -1.117199 | 1.196665  | 1.744484  |
| H  | 0.099388  | 0.931620  | 5.877041  |
| H  | 0.967106  | -1.365481 | 5.455675  |
| H  | 0.832400  | -2.350914 | 3.188968  |
| H  | 1.286438  | -3.611545 | -0.884184 |
| H  | 1.546418  | -1.316917 | -2.284660 |
| H  | 2.532944  | -2.680625 | -2.845399 |
| H  | 3.550092  | -0.155626 | -1.694031 |
| H  | 4.511337  | -1.551356 | -2.174601 |
| H  | 5.969666  | -1.769898 | -0.218279 |
| H  | 5.364144  | -1.738121 | 1.450326  |
| H  | 5.384295  | -0.246986 | 0.480798  |
| H  | 3.733470  | -5.028719 | -1.132982 |
| H  | 5.209231  | -4.214344 | -0.580299 |
| H  | 4.375182  | -3.647184 | -2.037880 |
| H  | 2.926530  | -4.842498 | 1.158802  |
| H  | 2.683714  | -3.280945 | 1.970749  |
| H  | 4.326759  | -3.896204 | 1.685304  |
| H  | 3.640929  | -1.606487 | 3.036460  |
| H  | 3.445225  | -0.516710 | 4.423418  |
| H  | 4.987163  | -0.553107 | 3.542051  |
| H  | 3.663279  | 4.602313  | 1.531843  |
| H  | 1.920434  | 4.641053  | 1.870387  |
| H  | 2.496067  | 4.376309  | 0.213154  |
| H  | -1.491913 | 5.146463  | 1.677147  |
| H  | -0.148566 | 3.090904  | 1.542288  |
| H  | -1.856045 | 6.552001  | -0.354280 |
| H  | -0.851153 | 5.844933  | -2.526302 |
| H  | 0.515811  | 3.805154  | -2.661328 |
| H  | 2.377907  | 1.394148  | -5.483423 |
| H  | 0.892694  | 1.136659  | -3.520591 |
| H  | 4.664019  | 2.349257  | -5.202014 |
| H  | 5.435599  | 3.064108  | -2.943792 |
| H  | 3.955175  | 2.800811  | -0.981142 |
| Cu | -1.172515 | 0.109296  | -0.927226 |
| H  | -2.942263 | 0.359864  | -2.869662 |
| H  | -1.392527 | 1.294289  | -3.182269 |
| H  | -0.091120 | -0.802299 | -3.254606 |

121

Figure 1\_pcl\_minor01\_05 / electronic energy: -4987.95012928 a.u. / lowest freq: 21.46 cm-1

|   |           |           |           |
|---|-----------|-----------|-----------|
| B | -1.614375 | -1.861202 | -0.310978 |
| O | -1.540463 | -3.244361 | -0.226675 |
| O | -2.835229 | -1.443874 | 0.210568  |
| C | -2.823492 | -3.776664 | 0.126566  |
| C | -3.515801 | -2.549607 | 0.817478  |
| C | -2.631416 | -4.988638 | 1.025513  |
| C | -3.507412 | -4.190441 | -1.177377 |
| C | -3.248925 | -2.475698 | 2.319697  |
| C | -5.007930 | -2.414359 | 0.550125  |
| H | -2.174917 | -2.569964 | 2.530049  |
| H | -3.787007 | -3.259971 | 2.872996  |
| H | -3.584291 | -1.495150 | 2.687858  |
| H | -5.222783 | -2.304687 | -0.521351 |
| H | -5.393854 | -1.520511 | 1.063238  |
| H | -5.557790 | -3.288961 | 0.930492  |
| H | -3.655827 | -3.324057 | -1.839710 |
| H | -4.482595 | -4.668610 | -1.001261 |
| H | -2.863399 | -4.908803 | -1.706403 |
| H | -2.007524 | -4.747239 | 1.896076  |
| H | -2.128609 | -5.792384 | 0.466290  |
| H | -3.599788 | -5.375603 | 1.379267  |
| C | 2.797239  | -0.807454 | -4.174953 |
| C | 4.061815  | -1.366933 | -4.352293 |
| C | 1.827309  | -1.434985 | -3.374344 |
| C | 4.396932  | -2.567066 | -3.725507 |
| C | 2.180377  | -2.648021 | -2.754080 |
| C | 3.445138  | -3.201968 | -2.924130 |
| C | 0.491035  | -0.831941 | -3.223301 |
| C | -0.659153 | -1.566083 | -2.924043 |
| H | 3.694049  | -4.138852 | -2.418842 |
| H | 1.457139  | -3.151916 | -2.108013 |
| H | 5.390131  | -3.003091 | -3.855182 |
| H | 4.794143  | -0.855673 | -4.982763 |
| H | 2.550341  | 0.136888  | -4.669100 |
| P | 1.447236  | -0.751465 | 0.497081  |

|    |           |           |           |
|----|-----------|-----------|-----------|
| C  | 3.697630  | -0.065441 | -0.960209 |
| C  | 5.054730  | -0.003925 | -1.270353 |
| C  | 3.243653  | -0.846902 | 0.107303  |
| C  | 5.973299  | -0.747156 | -0.530331 |
| C  | 4.172424  | -1.588669 | 0.847191  |
| C  | 5.528327  | -1.543585 | 0.525217  |
| C  | 1.248310  | -4.609894 | 1.880115  |
| C  | 1.522203  | -3.476951 | 1.120335  |
| C  | 1.175628  | -2.202513 | 1.590338  |
| C  | 0.611296  | -4.489534 | 3.117254  |
| C  | 0.245025  | -3.228490 | 3.581644  |
| C  | 0.521643  | -2.092527 | 2.818510  |
| C  | 2.697666  | 1.417416  | 2.046959  |
| C  | 1.425909  | 0.695953  | 1.610786  |
| C  | 0.376494  | 1.436786  | 2.031698  |
| C  | 2.783568  | 2.656045  | 1.115612  |
| C  | 1.592881  | 3.507866  | 1.600923  |
| C  | 0.976989  | 2.664901  | 2.764723  |
| C  | 0.074661  | 3.485575  | 3.663450  |
| C  | 2.268224  | 2.046380  | 3.394857  |
| C  | 3.253654  | 3.080397  | 3.952508  |
| C  | 2.046381  | 1.013653  | 4.500242  |
| C  | -1.098985 | 1.337691  | 1.837743  |
| C  | -1.931774 | 1.132357  | 2.910685  |
| C  | -1.838331 | 1.727648  | 0.634935  |
| S  | -3.569751 | 1.510920  | 2.511985  |
| C  | -3.177208 | 1.927555  | 0.878458  |
| C  | -1.618132 | 0.645084  | 4.289567  |
| C  | -4.295239 | 2.438343  | 0.020254  |
| P  | -1.052852 | 1.524377  | -1.008057 |
| C  | -4.314242 | 0.396586  | -3.243359 |
| C  | -3.366829 | 0.511689  | -2.230568 |
| C  | -4.289572 | 1.265312  | -4.336467 |
| C  | -2.384425 | 1.513839  | -2.281506 |
| C  | -3.307749 | 2.250730  | -4.404869 |
| C  | -2.361230 | 2.375852  | -3.384945 |
| C  | -0.111024 | 5.536040  | -1.300458 |
| C  | -0.784279 | 4.351408  | -1.015140 |
| C  | 1.134264  | 5.496833  | -1.933427 |
| C  | -0.218219 | 3.116218  | -1.358587 |
| C  | 1.697727  | 4.272605  | -2.288882 |
| C  | 1.021462  | 3.085495  | -2.003003 |
| H  | 2.977864  | 0.500430  | -1.556179 |
| H  | 5.392244  | 0.616231  | -2.103685 |
| H  | 7.037021  | -0.708071 | -0.776962 |
| H  | 3.843569  | -2.198539 | 1.691261  |
| H  | 6.241967  | -2.128707 | 1.110215  |
| H  | 1.526781  | -5.595719 | 1.500393  |
| H  | 2.010989  | -3.587173 | 0.148900  |
| H  | 0.393392  | -5.380374 | 3.711091  |
| H  | -0.266013 | -3.121542 | 4.541481  |
| H  | 0.204757  | -1.113153 | 3.177037  |
| H  | 3.605830  | 0.803308  | 2.073778  |
| H  | 2.697747  | 2.368337  | 0.060083  |
| H  | 3.745085  | 3.176073  | 1.235836  |
| H  | 0.847544  | 3.692660  | 0.821127  |
| H  | 1.913237  | 4.491544  | 1.975105  |
| H  | 0.623078  | 4.361523  | 4.043732  |
| H  | -0.288018 | 2.918915  | 4.532055  |
| H  | -0.803267 | 3.859474  | 3.114356  |
| H  | 4.229354  | 2.605177  | 4.142887  |
| H  | 2.888787  | 3.473286  | 4.914947  |
| H  | 3.429398  | 3.940238  | 3.294677  |
| H  | 3.017701  | 0.647557  | 4.868828  |
| H  | 1.481132  | 0.136820  | 4.166246  |
| H  | 1.521329  | 1.460695  | 5.359572  |
| H  | -0.536945 | 0.635494  | 4.463740  |
| H  | -1.987650 | -0.384173 | 4.429138  |
| H  | -2.084660 | 1.270426  | 5.066056  |
| H  | -4.928300 | 3.125520  | 0.602239  |
| H  | -4.941553 | 1.625905  | -0.346428 |
| H  | -3.917514 | 2.986177  | -0.850289 |
| H  | -5.077781 | -0.382914 | -3.179897 |
| H  | -3.390448 | -0.175610 | -1.381784 |
| H  | -5.032322 | 1.171801  | -5.132383 |
| H  | -3.274284 | 2.935531  | -5.255808 |
| H  | -1.603367 | 3.157913  | -3.460053 |
| H  | -0.555181 | 6.495048  | -1.023906 |
| H  | -1.751998 | 4.383957  | -0.507286 |
| H  | 1.665528  | 6.426853  | -2.149457 |
| H  | 2.671105  | 4.238604  | -2.783519 |
| H  | 1.464171  | 2.122104  | -2.271112 |
| Cu | -0.157491 | -0.686128 | -1.143719 |
| H  | -0.618455 | -2.653822 | -2.821163 |
| H  | -1.634977 | -1.165630 | -3.209350 |
| H  | 0.365460  | 0.152733  | -3.685987 |

121

Figure 1\_ts(CuBadd)\_minor01\_01 / electronic energy: -4987.94730051 a.u. / lowest freq: -107.88 cm<sup>-1</sup>

|   |           |          |           |
|---|-----------|----------|-----------|
| B | -2.786277 | 0.887420 | -0.117073 |
| O | -3.724278 | 0.112202 | 0.553111  |
| O | -3.251756 | 2.176492 | -0.257473 |
| C | -4.958460 | 0.843803 | 0.647856  |
| C | -4.475458 | 2.330725 | 0.477569  |
| C | -5.615559 | 0.533189 | 1.984203  |
| C | -5.857215 | 0.366969 | -0.492539 |
| C | -4.137995 | 3.007944 | 1.804404  |
| C | -5.413090 | 3.219800 | -0.326501 |

|   |           |           |           |
|---|-----------|-----------|-----------|
| H | -3.435573 | 2.404056  | 2.397583  |
| H | -5.039478 | 3.190623  | 2.407254  |
| H | -3.659869 | 3.975468  | 1.599398  |
| H | -5.573470 | 2.829766  | -1.340218 |
| H | -4.974936 | 4.224891  | -0.419292 |
| H | -6.389652 | 3.317594  | 0.172021  |
| H | -5.403178 | 0.559416  | -1.476022 |
| H | -6.841931 | 0.855895  | -0.466697 |
| H | -6.012969 | -0.718017 | -0.397814 |
| H | -4.938782 | 0.728019  | 2.826622  |
| H | -5.897364 | -0.529769 | 2.019488  |
| H | -6.529369 | 1.131486  | 2.120409  |
| C | -1.314715 | -3.194477 | -3.374557 |
| C | -1.837593 | -4.481757 | -3.439116 |
| C | -2.003529 | -2.145633 | -2.723494 |
| C | -3.079403 | -4.777947 | -2.868189 |
| C | -3.256985 | -2.467198 | -2.151653 |
| C | -3.782384 | -3.754918 | -2.229645 |
| C | -1.430758 | -0.806574 | -2.651149 |
| C | -2.201299 | 0.325952  | -2.234673 |
| H | -4.752422 | -3.962858 | -1.769295 |
| H | -3.813995 | -1.703238 | -1.604238 |
| H | -3.491865 | -5.788079 | -2.923191 |
| H | -1.271235 | -5.266370 | -3.948867 |
| H | -0.347539 | -2.983082 | -3.838614 |
| P | -0.077796 | -1.208096 | 1.054292  |
| C | -1.658861 | -3.470239 | 0.746016  |
| C | -2.195793 | -4.708673 | 1.097296  |
| C | -0.803285 | -2.795439 | 1.620883  |
| C | -1.885250 | -5.277677 | 2.331115  |
| C | -0.496786 | -3.369594 | 2.861246  |
| C | -1.036098 | -4.605389 | 3.213040  |
| C | -0.996736 | 1.299091  | 4.147423  |
| C | -1.025924 | 0.555177  | 2.969648  |
| C | 0.065218  | -0.244586 | 2.606724  |
| C | 0.129127  | 1.258411  | 4.970490  |
| C | 1.213937  | 0.453295  | 4.622906  |
| C | 1.179296  | -0.302255 | 3.451366  |
| C | 1.823805  | -2.972193 | -0.226264 |
| C | 1.594907  | -1.692479 | 0.565575  |
| C | 2.724346  | -0.958617 | 0.479612  |
| C | 1.820513  | -2.519933 | -1.711463 |
| C | 3.110609  | -1.679197 | -1.802571 |
| C | 3.721687  | -1.776186 | -0.364645 |
| C | 5.189580  | -1.405078 | -0.315570 |
| C | 3.326334  | -3.234628 | 0.043619  |
| C | 3.946039  | -4.323665 | -0.836608 |
| C | 3.622598  | -3.607673 | 1.498576  |
| C | 3.001227  | 0.435860  | 0.893322  |
| C | 3.951407  | 0.736350  | 1.841187  |
| C | 2.424546  | 1.624155  | 0.285626  |
| S | 4.185486  | 2.442202  | 1.956330  |
| C | 3.016701  | 2.787624  | 0.734181  |
| C | 4.702495  | -0.175400 | 2.758793  |
| C | 2.844999  | 4.215456  | 0.311890  |
| P | 1.015822  | 1.551655  | -0.889769 |
| C | -0.968411 | 4.492863  | 1.143880  |
| C | -0.284114 | 3.335692  | 0.791605  |
| C | -1.283975 | 5.445046  | 0.172240  |
| C | 0.131239  | 3.126343  | -0.530315 |
| C | -0.905054 | 5.226845  | -1.150159 |
| C | -0.194942 | 4.076033  | -1.500457 |
| C | 1.566118  | 1.886518  | -4.945287 |
| C | 1.009140  | 1.729591  | -3.677289 |
| C | 2.931980  | 2.132677  | -5.083958 |
| C | 1.804484  | 1.835115  | -2.526455 |
| C | 3.733956  | 2.228188  | -3.947156 |
| C | 3.174764  | 2.083640  | -2.677747 |
| H | -1.906003 | -3.025800 | -0.219600 |
| H | -2.860595 | -5.224658 | 0.400500  |
| H | -2.307616 | -6.245911 | 2.610309  |
| H | 0.164446  | -2.852480 | 3.560799  |
| H | -0.793504 | -5.047070 | 4.182411  |
| H | -1.854499 | 1.919420  | 4.418450  |
| H | -1.904192 | 0.592359  | 2.320213  |
| H | 0.159153  | 1.849869  | 5.888680  |
| H | 2.093275  | 0.409948  | 5.269921  |
| H | 2.025892  | -0.939564 | 3.192027  |
| H | 1.137746  | -3.799222 | 0.000303  |
| H | 0.915356  | -1.942423 | -1.936058 |
| H | 1.841835  | -3.387440 | -2.386137 |
| H | 2.923516  | -0.631500 | -2.073261 |
| H | 3.815809  | -2.077652 | -2.547704 |
| H | 5.753602  | -2.000846 | -1.050045 |
| H | 5.636651  | -1.587748 | 0.671463  |
| H | 5.343507  | -0.343250 | -0.563839 |
| H | 3.448781  | -5.288848 | -0.649066 |
| H | 5.012158  | -4.453302 | -0.591512 |
| H | 3.880800  | -4.123839 | -1.913628 |
| H | 3.260773  | -4.627641 | 1.703616  |
| H | 3.140082  | -2.937750 | 2.221933  |
| H | 4.707057  | -3.601055 | 1.693601  |
| H | 4.429551  | -1.220718 | 2.572006  |
| H | 4.469761  | 0.047084  | 3.812476  |
| H | 5.792359  | -0.078495 | 2.635989  |
| H | 3.762813  | 4.787435  | 0.511612  |
| H | 2.018106  | 4.707290  | 0.846506  |

|    |           |           |           |
|----|-----------|-----------|-----------|
| H  | 2.634078  | 4.284342  | -0.763220 |
| H  | -1.261450 | 4.649255  | 2.184747  |
| H  | -0.049109 | 2.594609  | 1.559749  |
| H  | -1.826904 | 6.352969  | 0.445990  |
| H  | -1.150116 | 5.963217  | -1.919348 |
| H  | 0.118798  | 3.938812  | -2.537583 |
| H  | 0.928763  | 1.806140  | -5.828802 |
| H  | -0.059956 | 1.527686  | -3.587801 |
| H  | 3.372230  | 2.246647  | -6.077298 |
| H  | 4.805357  | 2.417369  | -4.046737 |
| H  | 3.815986  | 2.157484  | -1.796800 |
| Cu | -1.055612 | -0.069771 | -0.647854 |
| H  | -3.292346 | 0.219474  | -2.222719 |
| H  | -1.904553 | 1.318506  | -2.591299 |
| H  | -0.517811 | -0.640095 | -3.229435 |

121

Figure 1\_ts(CuBadd)\_minor01\_02 / electronic energy: -4987.94593447 a.u. / lowest freq: -131.74 cm<sup>-1</sup>

|   |           |           |           |
|---|-----------|-----------|-----------|
| B | -3.036591 | -0.190902 | -1.602248 |
| O | -4.219584 | -0.448510 | -0.935792 |
| O | -3.272704 | 0.554485  | -2.739989 |
| C | -5.316742 | -0.019949 | -1.759460 |
| C | -4.627297 | 1.040330  | -2.686536 |
| C | -6.417810 | 0.528813  | -0.867078 |
| C | -5.813734 | -1.245809 | -2.523710 |
| C | -4.582218 | 2.434023  | -2.060390 |
| C | -5.187483 | 1.115937  | -4.097560 |
| H | -4.193002 | 2.393437  | -1.032263 |
| H | -5.576506 | 2.903401  | -2.037853 |
| H | -3.915289 | 3.075606  | -2.655163 |
| H | -5.075754 | 0.161834  | -4.629176 |
| H | -4.654093 | 1.888538  | -4.671546 |
| H | -6.254929 | 1.384220  | -4.077952 |
| H | -5.040489 | -1.641583 | -3.199173 |
| H | -6.710944 | -1.020409 | -3.118827 |
| H | -6.070151 | -2.036080 | -1.802567 |
| H | -6.035197 | 1.295181  | -0.180283 |
| H | -6.842268 | -0.283773 | -0.258584 |
| H | -7.230453 | 0.962673  | -1.469898 |
| C | -0.550834 | -4.495064 | 0.495645  |
| C | -0.939887 | -5.213263 | 1.620522  |
| C | -1.400337 | -3.543366 | -0.113172 |
| C | -2.203082 | -5.021207 | 2.187171  |
| C | -2.685810 | -3.380373 | 0.461666  |
| C | -3.068764 | -4.102310 | 1.590655  |
| C | -0.943127 | -2.738948 | -1.240411 |
| C | -1.865716 | -2.020001 | -2.093779 |
| H | -4.063630 | -3.938092 | 2.015021  |
| H | -3.383661 | -2.651426 | 0.039160  |
| H | -2.507128 | -5.579829 | 3.075354  |
| H | -0.245596 | -5.933219 | 2.063216  |
| H | 0.443284  | -4.658536 | 0.074420  |
| P | -0.993848 | 0.322717  | 1.243570  |
| C | 0.461448  | -1.749998 | 2.361069  |
| C | 1.064501  | -2.480569 | 3.384147  |
| C | -0.336177 | -0.642281 | 2.656919  |
| C | 0.863482  | -2.109417 | 4.712313  |
| C | -0.539425 | -0.275090 | 3.993686  |
| C | 0.058930  | -1.008032 | 5.016031  |
| C | -4.273584 | 2.704699  | 1.985872  |
| C | -2.997264 | 2.274970  | 1.620212  |
| C | -2.601640 | 0.954460  | 1.851578  |
| C | -5.167361 | 1.816029  | 2.580735  |
| C | -4.782172 | 0.492720  | 2.803285  |
| C | -3.509506 | 0.062559  | 2.436704  |
| C | 0.352913  | 2.780958  | 2.269403  |
| C | 0.099775  | 1.755685  | 1.175261  |
| C | 0.992194  | 1.985399  | 0.191384  |
| C | 1.707982  | 2.360640  | 2.908533  |
| C | 2.720622  | 2.674789  | 1.786192  |
| C | 1.829781  | 3.201588  | 0.617793  |
| C | 2.580578  | 3.911459  | -0.489156 |
| C | 0.763763  | 4.024744  | 1.428267  |
| C | 1.341945  | 5.176970  | 2.257298  |
| C | -0.351467 | 4.624997  | 0.572427  |
| C | 1.173172  | 1.234206  | -1.077324 |
| C | 0.382759  | 1.498733  | -2.171938 |
| C | 2.185850  | 0.226223  | -1.345477 |
| S | 0.874592  | 0.544540  | -3.522769 |
| C | 2.147621  | -0.227393 | -2.647766 |
| C | -0.740448 | 2.477607  | -2.315806 |
| C | 3.004884  | -1.223927 | -3.368026 |
| P | 3.321590  | -0.323521 | -0.014742 |
| C | 3.153779  | -4.352381 | -0.779282 |
| C | 2.831749  | -3.028926 | -0.486035 |
| C | 4.474533  | -4.709512 | -1.054911 |
| C | 3.818752  | -2.033143 | -0.490527 |
| C | 5.466627  | -3.731062 | -1.038106 |
| C | 5.142115  | -2.402631 | -0.760255 |
| C | 6.998142  | 1.419970  | 0.481217  |
| C | 5.808711  | 0.716749  | 0.664462  |
| C | 7.246205  | 2.067323  | -0.729803 |
| C | 4.859011  | 0.632985  | -0.364447 |
| C | 6.301489  | 2.004147  | -1.753579 |
| C | 5.115995  | 1.290768  | -1.572969 |
| H | 0.598822  | -2.040167 | 1.317831  |
| H | 1.685778  | -3.344775 | 3.138085  |
| H | 1.331100  | -2.680888 | 5.517690  |



|    |           |           |           |
|----|-----------|-----------|-----------|
| H  | -1.164542 | 0.587254  | 4.239660  |
| H  | -0.102388 | -0.719163 | 6.057220  |
| H  | -4.567320 | 3.740636  | 1.800880  |
| H  | -2.311077 | 2.976921  | 1.144970  |
| H  | -6.167526 | 2.151261  | 2.865405  |
| H  | -5.481343 | -0.213024 | 3.257735  |
| H  | -3.225068 | -0.980620 | 2.600596  |
| H  | -0.467630 | 2.922644  | 2.986416  |
| H  | 1.702982  | 1.296345  | 3.180015  |
| H  | 1.909108  | 2.932318  | 3.825965  |
| H  | 3.294680  | 1.793463  | 1.484413  |
| H  | 3.448284  | 3.446208  | 2.077219  |
| H  | 3.093184  | 4.805539  | -0.101318 |
| H  | 1.905849  | 4.227492  | -1.299932 |
| H  | 3.347288  | 3.255044  | -0.927432 |
| H  | 0.546859  | 5.623667  | 2.875367  |
| H  | 1.722804  | 5.970307  | 1.594844  |
| H  | 2.158052  | 4.891846  | 2.932158  |
| H  | -1.126667 | 5.073135  | 1.214089  |
| H  | -0.833875 | 3.895135  | -0.084382 |
| H  | 0.046700  | 5.430306  | -0.064885 |
| H  | -1.410248 | 2.418774  | -1.447661 |
| H  | -1.350463 | 2.251186  | -3.198886 |
| H  | -0.364313 | 3.509710  | -2.400962 |
| H  | 2.919889  | -1.095716 | -4.456643 |
| H  | 2.717385  | -2.259188 | -3.127831 |
| H  | 4.061759  | -1.104584 | -3.094900 |
| H  | 2.370240  | -5.113893 | -0.791089 |
| H  | 1.792501  | -2.762093 | -0.277164 |
| H  | 4.727127  | -5.748664 | -1.278213 |
| H  | 6.505002  | -3.997894 | -1.249541 |
| H  | 5.932671  | -1.649622 | -0.770042 |
| H  | 7.730887  | 1.469387  | 1.290100  |
| H  | 5.615914  | 0.223499  | 1.622047  |
| H  | 8.175385  | 2.623715  | -0.873848 |
| H  | 6.485949  | 2.513980  | -2.702234 |
| H  | 4.380862  | 1.256377  | -2.380015 |
| Cu | -1.311565 | -0.753640 | -0.681349 |
| H  | -2.899370 | -2.387792 | -2.156898 |
| H  | -1.473707 | -1.715908 | -3.071116 |
| H  | 0.056780  | -2.947334 | -1.630797 |

121

Figure 1\_ts(CuBadd)\_minor01\_03 / electronic energy: -4987.94518213 a.u. / lowest freq: -182.92 cm<sup>-1</sup>

|   |           |           |           |
|---|-----------|-----------|-----------|
| B | -2.939052 | -0.058017 | -1.795830 |
| O | -4.229269 | -0.224193 | -1.318691 |
| O | -2.947299 | 0.675761  | -2.964838 |
| C | -5.151740 | 0.201898  | -2.337005 |
| C | -4.272279 | 1.200745  | -3.168036 |
| C | -6.371563 | 0.818764  | -1.672713 |
| C | -5.555080 | -1.038850 | -3.132064 |
| C | -4.299960 | 2.622397  | -2.606681 |
| C | -4.571894 | 1.227214  | -4.658439 |
| H | -4.081150 | 2.634570  | -1.528430 |
| H | -5.276648 | 3.101638  | -2.767858 |
| H | -3.537058 | 3.229549  | -3.114870 |
| H | -4.408294 | 0.247338  | -5.125627 |
| H | -3.913324 | 1.953312  | -5.157865 |
| H | -5.613607 | 1.532584  | -4.840465 |
| H | -4.691126 | -1.493969 | -3.639205 |
| H | -6.317444 | -0.806314 | -3.889548 |
| H | -5.973353 | -1.786275 | -2.441496 |
| H | -6.090731 | 1.606147  | -0.961205 |
| H | -6.923267 | 0.045457  | -1.117592 |
| H | -7.052553 | 1.247755  | -2.423548 |
| C | -0.949197 | -4.312466 | 0.689557  |
| C | -1.549494 | -5.087719 | 1.672714  |
| C | -1.679409 | -3.356879 | -0.057651 |
| C | -2.907888 | -4.938867 | 1.974318  |
| C | -3.049817 | -3.207256 | 0.277069  |
| C | -3.642938 | -3.983994 | 1.271887  |
| C | -1.043378 | -2.563027 | -1.095697 |
| C | -1.828189 | -1.797795 | -2.054698 |
| H | -4.703406 | -3.837377 | 1.497162  |
| H | -3.660212 | -2.464791 | -0.244447 |
| H | -3.378274 | -5.548387 | 2.749507  |
| H | -0.945901 | -5.816573 | 2.221038  |
| H | 0.114374  | -4.445182 | 0.479580  |
| P | -0.945088 | 0.278675  | 1.445205  |
| C | 0.908079  | -1.380429 | 2.729437  |
| C | 1.296736  | -2.448531 | 3.536753  |
| C | -0.442157 | -1.028000 | 2.624615  |
| C | 0.340059  | -3.173290 | 4.247319  |
| C | -1.401961 | -1.782033 | 3.310556  |
| C | -1.008741 | -2.839657 | 4.128841  |
| C | -3.429254 | 2.094534  | 4.213212  |
| C | -2.397980 | 1.345035  | 3.651215  |
| C | -2.339764 | 1.148224  | 2.264224  |
| C | -4.411435 | 2.658425  | 3.396707  |
| C | -4.365477 | 2.459305  | 2.018141  |
| C | -3.338156 | 1.701636  | 1.455691  |
| C | 0.661272  | 2.504065  | 2.619951  |
| C | 0.340060  | 1.549781  | 1.479214  |
| C | 1.104936  | 1.909376  | 0.428558  |
| C | 2.101223  | 2.153434  | 3.082167  |
| C | 2.959230  | 2.601870  | 1.879150  |
| C | 1.911270  | 3.144425  | 0.858646  |
| C | 2.502370  | 3.979199  | -0.257874 |

|    |           |           |           |
|----|-----------|-----------|-----------|
| C  | 0.881308  | 3.827284  | 1.835067  |
| C  | 1.459228  | 4.974101  | 2.670583  |
| C  | -0.391759 | 4.360462  | 1.174864  |
| C  | 1.196256  | 1.265312  | -0.904889 |
| C  | 0.389658  | 1.647288  | -1.952154 |
| C  | 2.136587  | 0.223186  | -1.270154 |
| S  | 0.760857  | 0.733695  | -3.367192 |
| C  | 2.010356  | -0.164886 | -2.587732 |
| C  | -0.677375 | 2.695170  | -1.978780 |
| C  | 2.770094  | -1.185087 | -3.380029 |
| P  | 3.370047  | -0.374490 | -0.056737 |
| C  | 2.818639  | -4.388635 | -0.595750 |
| C  | 2.652736  | -3.038757 | -0.291935 |
| C  | 4.027975  | -4.846744 | -1.120945 |
| C  | 3.684646  | -2.121283 | -0.537982 |
| C  | 5.068351  | -3.944935 | -1.341000 |
| C  | 4.898125  | -2.590521 | -1.053692 |
| C  | 7.185622  | 1.108359  | 0.017616  |
| C  | 5.993615  | 0.449685  | 0.312271  |
| C  | 7.305250  | 1.839180  | -1.165444 |
| C  | 4.909178  | 0.493858  | -0.577588 |
| C  | 6.228330  | 1.904490  | -2.048373 |
| C  | 5.037979  | 1.235764  | -1.757785 |
| H  | 1.663151  | -0.823716 | 2.167620  |
| H  | 2.354902  | -2.710848 | 3.609776  |
| H  | 0.644603  | -4.006561 | 4.885004  |
| H  | -2.464277 | -1.545744 | 3.211682  |
| H  | -1.766269 | -3.415815 | 4.664581  |
| H  | -3.465493 | 2.240797  | 5.295193  |
| H  | -1.635819 | 0.908374  | 4.301155  |
| H  | -5.218530 | 3.246951  | 3.839385  |
| H  | -5.137887 | 2.886995  | 1.374679  |
| H  | -3.319963 | 1.518990  | 0.379099  |
| H  | -0.079505 | 2.545621  | 3.427886  |
| H  | 2.202910  | 1.082636  | 3.301798  |
| H  | 2.359615  | 2.700606  | 4.000319  |
| H  | 3.545059  | 1.782885  | 1.447221  |
| H  | 3.671307  | 3.396660  | 2.145470  |
| H  | 3.018889  | 4.861425  | 0.151294  |
| H  | 1.731337  | 4.331491  | -0.959951 |
| H  | 3.241437  | 3.400185  | -0.833863 |
| H  | 0.744811  | 5.254775  | 3.460909  |
| H  | 1.611811  | 5.864501  | 2.040354  |
| H  | 2.416147  | 4.749008  | 3.157334  |
| H  | -1.079483 | 4.747729  | 1.943554  |
| H  | -0.935199 | 3.599451  | 0.604574  |
| H  | -0.157643 | 5.194722  | 0.494103  |
| H  | -1.430343 | 2.490840  | -1.204307 |
| H  | -1.199833 | 2.702153  | -2.942604 |
| H  | -0.256825 | 3.695952  | -1.797282 |
| H  | 2.585008  | -1.063644 | -4.456843 |
| H  | 2.480433  | -2.210581 | -3.102619 |
| H  | 3.851213  | -1.089958 | -3.209785 |
| H  | 2.001870  | -5.091767 | -0.415877 |
| H  | 1.705323  | -2.688554 | 0.129893  |
| H  | 4.159992  | -5.906305 | -1.351963 |
| H  | 6.019726  | -4.295444 | -1.748696 |
| H  | 5.717109  | -1.895145 | -1.251264 |
| H  | 8.020017  | 1.060596  | 0.721385  |
| H  | 5.901902  | -0.104750 | 1.251172  |
| H  | 8.236019  | 2.363672  | -1.394192 |
| H  | 6.312651  | 2.478509  | -2.974273 |
| H  | 4.202075  | 1.300748  | -2.457816 |
| Cu | -1.390172 | -0.581013 | -0.551817 |
| H  | -2.838992 | -2.172611 | -2.277510 |
| H  | -1.294066 | -1.511604 | -2.967983 |
| H  | -0.006203 | -2.796659 | -1.347127 |

121

Figure 1\_ts(CuBadd)\_minor01\_04 / electronic energy: -4987.94747424 a.u. / lowest freq: -174.36 cm-1

|   |          |           |           |
|---|----------|-----------|-----------|
| B | 3.349062 | 0.004295  | -1.272019 |
| O | 4.439890 | 0.522514  | -0.597899 |
| O | 3.739216 | -1.027231 | -2.101677 |
| C | 5.640952 | -0.034484 | -1.163610 |
| C | 5.111129 | -1.357954 | -1.824048 |
| C | 6.660494 | -0.241135 | -0.055378 |
| C | 6.164720 | 0.973918  | -2.184443 |
| C | 5.108729 | -2.554217 | -0.872005 |
| C | 5.801364 | -1.738541 | -3.124777 |
| H | 4.636637 | -2.309474 | 0.089928  |
| H | 6.127720 | -2.917526 | -0.674972 |
| H | 4.533978 | -3.373640 | -1.328460 |
| H | 5.679650 | -0.964375 | -3.893487 |
| H | 5.371777 | -2.672815 | -3.516342 |
| H | 6.876852 | -1.903620 | -2.959857 |
| H | 5.441338 | 1.135306  | -2.997981 |
| H | 7.117571 | 0.649576  | -2.627221 |
| H | 6.328935 | 1.939324  | -1.683152 |
| H | 6.244176 | -0.832087 | 0.770956  |
| H | 6.972231 | 0.732340  | 0.351245  |
| H | 7.556627 | -0.752068 | -0.439079 |
| C | 0.262964 | 4.391714  | -1.138997 |
| C | 0.439649 | 5.551174  | -0.394089 |
| C | 1.283465 | 3.418136  | -1.254796 |
| C | 1.646778 | 5.799701  | 0.269421  |
| C | 2.505908 | 3.697414  | -0.591882 |
| C | 2.674414 | 4.861122  | 0.155615  |
| C | 1.058793 | 2.185362  | -1.986174 |

|    |           |           |           |
|----|-----------|-----------|-----------|
| C  | 2.161666  | 1.327926  | -2.391421 |
| H  | 3.628106  | 5.033777  | 0.662771  |
| H  | 3.325035  | 2.973812  | -0.635795 |
| H  | 1.784793  | 6.711757  | 0.854566  |
| H  | -0.375842 | 6.277838  | -0.329748 |
| H  | -0.688798 | 4.214926  | -1.647773 |
| P  | 0.679216  | 0.069942  | 1.333683  |
| C  | -1.546994 | 0.983286  | 2.873867  |
| C  | -2.307246 | 1.990253  | 3.468434  |
| C  | -0.395629 | 1.304527  | 2.149477  |
| C  | -1.912356 | 3.323007  | 3.359360  |
| C  | -0.004748 | 2.646913  | 2.041131  |
| C  | -0.754654 | 3.649015  | 2.652094  |
| C  | 2.684803  | -0.354449 | 4.932064  |
| C  | 1.727288  | 0.003518  | 3.983058  |
| C  | 1.943732  | -0.265934 | 2.626622  |
| C  | 3.863587  | -0.987497 | 4.537358  |
| C  | 4.088965  | -1.250543 | 3.186172  |
| C  | 3.136997  | -0.883097 | 2.237726  |
| C  | -0.132033 | -2.665242 | 2.234730  |
| C  | -0.133062 | -1.545677 | 1.203749  |
| C  | -0.657458 | -2.052267 | 0.066708  |
| C  | -1.619137 | -2.914095 | 2.605522  |
| C  | -2.201439 | -3.489727 | 1.298253  |
| C  | -0.976247 | -3.529276 | 0.332668  |
| C  | -1.187736 | -4.419893 | -0.874089 |
| C  | 0.187740  | -3.888396 | 1.327749  |
| C  | 0.035241  | -5.251519 | 2.008339  |
| C  | 1.597000  | -3.841406 | 0.728144  |
| C  | -0.985656 | -1.335432 | -1.188063 |
| C  | -0.281064 | -1.486787 | -2.359901 |
| C  | -2.118724 | -0.435300 | -1.326066 |
| S  | -0.977517 | -0.521358 | -3.614426 |
| C  | -2.233810 | 0.085428  | -2.595490 |
| C  | 0.900434  | -2.350271 | -2.664829 |
| C  | -3.238498 | 1.037370  | -3.167278 |
| P  | -3.288891 | -0.198963 | 0.059638  |
| C  | -5.529344 | 3.289048  | -0.096721 |
| C  | -5.177562 | 1.938687  | -0.102137 |
| C  | -4.542376 | 4.272923  | -0.095027 |
| C  | -3.831746 | 1.551782  | -0.113651 |
| C  | -3.198799 | 3.896082  | -0.106855 |
| C  | -2.844401 | 2.548697  | -0.117589 |
| C  | -6.026139 | -2.587746 | -1.982884 |
| C  | -4.904061 | -1.804973 | -1.706928 |
| C  | -7.022567 | -2.753750 | -1.021837 |
| C  | -4.761453 | -1.178133 | -0.462892 |
| C  | -6.886160 | -2.144179 | 0.226065  |
| C  | -5.757825 | -1.376103 | 0.506802  |
| H  | -1.858508 | -0.056237 | 2.969809  |
| H  | -3.214626 | 1.729579  | 4.018039  |
| H  | -2.511329 | 4.110800  | 3.822163  |
| H  | 0.887854  | 2.916816  | 1.469870  |
| H  | -0.439413 | 4.690423  | 2.557073  |
| H  | 2.505190  | -0.139812 | 5.988083  |
| H  | 0.805502  | 0.490507  | 4.308764  |
| H  | 4.609982  | -1.270289 | 5.283237  |
| H  | 5.013804  | -1.736975 | 2.866774  |
| H  | 3.321251  | -1.065714 | 1.178561  |
| H  | 0.535877  | -2.517002 | 3.093486  |
| H  | -2.123539 | -1.991244 | 2.918526  |
| H  | -1.697553 | -3.625001 | 3.440460  |
| H  | -3.010554 | -2.875449 | 0.881617  |
| H  | -2.608118 | -4.502763 | 1.434490  |
| H  | -1.461287 | -5.437733 | -0.555175 |
| H  | -0.287225 | -4.495523 | -1.499465 |
| H  | -2.006099 | -4.039989 | -1.505974 |
| H  | 0.763466  | -5.345558 | 2.829778  |
| H  | 0.248565  | -6.059125 | 1.290265  |
| H  | -0.961217 | -5.440378 | 2.427178  |
| H  | 2.343707  | -4.046754 | 1.511410  |
| H  | 1.846729  | -2.870048 | 0.282624  |
| H  | 1.718475  | -4.614995 | -0.047073 |
| H  | 1.274291  | -2.819506 | -1.748312 |
| H  | 1.736249  | -1.776715 | -3.087834 |
| H  | 0.634735  | -3.147227 | -3.377554 |
| H  | -3.309440 | 0.930352  | -4.259218 |
| H  | -2.968862 | 2.082530  | -2.946428 |
| H  | -4.235310 | 0.860253  | -2.741791 |
| H  | -6.585664 | 3.569510  | -0.094288 |
| H  | -5.967782 | 1.184965  | -0.106378 |
| H  | -4.816612 | 5.330478  | -0.084936 |
| H  | -2.415322 | 4.656394  | -0.100430 |
| H  | -1.785002 | 2.274466  | -0.134538 |
| H  | -6.120939 | -3.070720 | -2.958421 |
| H  | -4.130976 | -1.690022 | -2.469893 |
| H  | -7.901573 | -3.364272 | -1.241813 |
| H  | -7.655670 | -2.277719 | 0.990267  |
| H  | -5.646261 | -0.923512 | 1.496844  |
| Cu | 1.490654  | 0.625633  | -0.663786 |
| H  | 3.144359  | 1.806879  | -2.519652 |
| H  | 1.937654  | 0.646147  | -3.219823 |
| H  | 0.101342  | 2.073230  | -2.502047 |

121

Figure 1\_ts(CuBadd)\_minor01\_05 / electronic energy: -4987.94747424 a.u. / lowest freq: -174.36 cm<sup>-1</sup>

|   |           |           |           |
|---|-----------|-----------|-----------|
| B | -3.349062 | -0.004299 | -1.272018 |
| O | -4.439887 | -0.522518 | -0.597894 |

|   |           |           |           |
|---|-----------|-----------|-----------|
| O | -3.739218 | 1.027228  | -2.101674 |
| C | -5.640951 | 0.034481  | -1.163600 |
| C | -5.111130 | 1.357952  | -1.824039 |
| C | -6.660489 | 0.241133  | -0.055364 |
| C | -6.164724 | -0.973920 | -2.184431 |
| C | -5.108725 | 2.554214  | -0.871995 |
| C | -5.801371 | 1.738540  | -3.124765 |
| H | -4.636627 | 2.309471  | 0.089935  |
| H | -6.127716 | 2.917522  | -0.674956 |
| H | -4.533978 | 3.373638  | -1.328454 |
| H | -5.679661 | 0.964375  | -3.893476 |
| H | -5.371785 | 2.672814  | -3.516331 |
| H | -6.876858 | 1.903620  | -2.959839 |
| H | -5.441346 | -1.135306 | -2.997974 |
| H | -7.117577 | -0.649578 | -2.627204 |
| H | -6.328935 | -1.939326 | -1.683140 |
| H | -6.244167 | 0.832084  | 0.770969  |
| H | -6.972225 | -0.732342 | 0.351260  |
| H | -7.556623 | 0.752066  | -0.439061 |
| C | -0.262965 | -4.391713 | -1.139000 |
| C | -0.439648 | -5.551175 | -0.394094 |
| C | -1.283467 | -3.418135 | -1.254795 |
| C | -1.646774 | -5.799704 | 0.269418  |
| C | -2.505908 | -3.697416 | -0.591879 |
| C | -2.674412 | -4.861124 | 0.155615  |
| C | -1.058797 | -2.185358 | -1.986170 |
| C | -2.161672 | -1.327921 | -2.391413 |
| H | -3.628103 | -5.033782 | 0.662773  |
| H | -3.325036 | -2.973814 | -0.635789 |
| H | -1.784788 | -6.711761 | 0.854562  |
| H | 0.375845  | -6.277838 | -0.329756 |
| H | 0.688796  | -4.214923 | -1.647777 |
| P | -0.679214 | -0.069941 | 1.333687  |
| C | 0.004750  | -2.646913 | 2.041135  |
| C | 0.754657  | -3.649015 | 2.652097  |
| C | 0.395632  | -1.304527 | 2.149480  |
| C | 1.912361  | -3.323007 | 3.359361  |
| C | 1.546998  | -0.983286 | 2.873867  |
| C | 2.307251  | -1.990253 | 3.468434  |
| C | -4.088962 | 1.250540  | 3.186182  |
| C | -3.136997 | 0.883091  | 2.237735  |
| C | -1.943727 | 0.265937  | 2.626629  |
| C | -3.863575 | 0.987506  | 4.537370  |
| C | -2.684785 | 0.354468  | 4.932075  |
| C | -1.727274 | -0.003502 | 3.983067  |
| C | 0.132039  | 2.665243  | 2.234729  |
| C | 0.133065  | 1.545676  | 1.203749  |
| C | 0.657456  | 2.052266  | 0.066706  |
| C | 1.619144  | 2.914097  | 2.605515  |
| C | 2.201441  | 3.489725  | 1.298243  |
| C | 0.976245  | 3.529276  | 0.332662  |
| C | 1.187729  | 4.419891  | -0.874096 |
| C | -0.187737 | 3.888396  | 1.327748  |
| C | -0.035237 | 5.251520  | 2.008335  |
| C | -1.597000 | 3.841404  | 0.728149  |
| C | 0.985652  | 1.335430  | -1.188066 |
| C | 0.281058  | 1.486785  | -2.359903 |
| C | 2.118720  | 0.435298  | -1.326071 |
| S | 0.977509  | 0.521356  | -3.614429 |
| C | 2.233803  | -0.085430 | -2.595495 |
| C | -0.900439 | 2.350271  | -2.664828 |
| C | 3.238490  | -1.037374 | -3.167283 |
| P | 3.288889  | 0.198961  | 0.059630  |
| C | 5.529345  | -3.289048 | -0.096731 |
| C | 5.177562  | -1.938687 | -0.102146 |
| C | 4.542377  | -4.272923 | -0.095037 |
| C | 3.831745  | -1.551783 | -0.113659 |
| C | 3.198800  | -3.896084 | -0.106863 |
| C | 2.844401  | -2.548699 | -0.117596 |
| C | 6.026133  | 2.587745  | -1.982896 |
| C | 4.904056  | 1.804971  | -1.706939 |
| C | 7.022561  | 2.753754  | -1.021850 |
| C | 4.761450  | 1.178134  | -0.462902 |
| C | 6.886154  | 2.144185  | 0.226054  |
| C | 5.757820  | 1.376108  | 0.506793  |
| H | -0.887853 | -2.916816 | 1.469876  |
| H | 0.439415  | -4.690423 | 2.557077  |
| H | 2.511334  | -4.110799 | 3.822164  |
| H | 1.858513  | 0.056237  | 2.969808  |
| H | 3.214632  | -1.729579 | 4.018036  |
| H | -5.013806 | 1.736963  | 2.866785  |
| H | -3.321258 | 1.065697  | 1.178569  |
| H | -4.609968 | 1.270300  | 5.283250  |
| H | -2.505166 | 0.139840  | 5.988094  |
| H | -0.805483 | -0.490483 | 4.308771  |
| H | -0.535868 | 2.517003  | 3.093488  |
| H | 2.123548  | 1.991247  | 2.918521  |
| H | 1.697562  | 3.625006  | 3.440451  |
| H | 3.010551  | 2.875443  | 0.881605  |
| H | 2.608126  | 4.502760  | 1.434475  |
| H | 1.461297  | 5.437727  | -0.555185 |
| H | 0.287210  | 4.495530  | -1.499460 |
| H | 2.006078  | 4.039977  | -1.505993 |
| H | -0.763457 | 5.345560  | 2.829776  |
| H | -0.248564 | 6.059124  | 1.290260  |
| H | 0.961224  | 5.440380  | 2.427168  |
| H | -2.343704 | 4.046753  | 1.511417  |

|    |           |           |           |
|----|-----------|-----------|-----------|
| H  | -1.846731 | 2.870045  | 0.282632  |
| H  | -1.718480 | 4.614990  | -0.047069 |
| H  | -1.274295 | 2.819505  | -1.748311 |
| H  | -1.736255 | 1.776717  | -3.087834 |
| H  | -0.634740 | 3.147228  | -3.377552 |
| H  | 3.309427  | -0.930362 | -4.259224 |
| H  | 2.968856  | -2.082534 | -2.946427 |
| H  | 4.235303  | -0.860253 | -2.741800 |
| H  | 6.585665  | -3.569509 | -0.094299 |
| H  | 5.967781  | -1.184964 | -0.106388 |
| H  | 4.816614  | -5.330478 | -0.084946 |
| H  | 2.415323  | -4.656396 | -0.100437 |
| H  | 1.785002  | -2.274468 | -0.134544 |
| H  | 6.120933  | 3.070716  | -2.958434 |
| H  | 4.130972  | 1.690016  | -2.469904 |
| H  | 7.901566  | 3.364277  | -1.241826 |
| H  | 7.655664  | 2.277729  | 0.990256  |
| H  | 5.646257  | 0.923519  | 1.496835  |
| Cu | -1.490653 | -0.625632 | -0.663779 |
| H  | -3.144363 | -1.806877 | -2.519647 |
| H  | -1.937661 | -0.646143 | -3.219817 |
| H  | -0.101348 | -2.073226 | -2.502046 |

121

Figure 1\_ts(CuBadd)\_minor01\_06 / electronic energy: -4987.94708758 a.u. / lowest freq: -81.68 cm-1

|   |           |           |           |
|---|-----------|-----------|-----------|
| B | 2.440749  | -1.296524 | 0.236237  |
| O | 3.431975  | -0.468565 | 0.739666  |
| O | 2.718351  | -2.611544 | 0.565823  |
| C | 4.530614  | -1.264460 | 1.211387  |
| C | 3.858981  | -2.670046 | 1.439452  |
| C | 5.101681  | -0.621274 | 2.466504  |
| C | 5.588611  | -1.274493 | 0.108756  |
| C | 3.337475  | -2.867461 | 2.860688  |
| C | 4.719024  | -3.859665 | 1.037978  |
| H | 2.726468  | -2.015168 | 3.184620  |
| H | 4.158716  | -2.999143 | 3.580267  |
| H | 2.707431  | -3.769223 | 2.891412  |
| H | 4.982801  | -3.829660 | -0.027384 |
| H | 4.169088  | -4.794890 | 1.222405  |
| H | 5.647122  | -3.891350 | 1.629080  |
| H | 5.207877  | -1.730087 | -0.817233 |
| H | 6.491911  | -1.822126 | 0.414878  |
| H | 5.878740  | -0.238065 | -0.119432 |
| H | 4.324411  | -0.442206 | 3.221341  |
| H | 5.553095  | 0.349369  | 2.212310  |
| H | 5.885207  | -1.254079 | 2.910605  |
| C | 1.949697  | 1.976184  | -4.091338 |
| C | 2.678613  | 3.123687  | -4.395222 |
| C | 2.328176  | 1.122366  | -3.034968 |
| C | 3.809483  | 3.463759  | -3.649797 |
| C | 3.447874  | 1.507646  | -2.263420 |
| C | 4.178780  | 2.649239  | -2.576922 |
| C | 1.608640  | -0.128026 | -2.790170 |
| C | 2.205916  | -1.205282 | -2.073106 |
| H | 5.042722  | 2.916227  | -1.961933 |
| H | 3.735232  | 0.910296  | -1.394088 |
| H | 4.383925  | 4.361735  | -3.889883 |
| H | 2.364026  | 3.756419  | -5.230093 |
| H | 1.076623  | 1.714303  | -4.697287 |
| P | 0.354898  | 1.323010  | 0.582130  |
| C | 2.425623  | 3.200580  | 1.032879  |
| C | 3.183679  | 4.326685  | 0.709067  |
| C | 1.322295  | 2.840140  | 0.250347  |
| C | 2.850812  | 5.103750  | -0.398547 |
| C | 1.037142  | 3.589758  | -0.900993 |
| C | 1.779581  | 4.725624  | -1.208422 |
| C | 0.615125  | -0.568332 | 4.218368  |
| C | 0.604769  | -0.293436 | 2.850371  |
| C | 0.521012  | 1.022454  | 2.390660  |
| C | 0.551491  | 0.474376  | 5.140367  |
| C | 0.461849  | 1.793687  | 4.690325  |
| C | 0.436545  | 2.065539  | 3.324531  |
| C | -1.981972 | 3.132638  | 0.036403  |
| C | -1.397236 | 1.820628  | 0.535910  |
| C | -2.427385 | 1.016508  | 0.880967  |
| C | -2.609812 | 2.793389  | -1.341540 |
| C | -3.808980 | 1.909111  | -0.939964 |
| C | -3.718905 | 1.828532  | 0.617686  |
| C | -5.006881 | 1.347172  | 1.254688  |
| C | -3.227204 | 3.281132  | 0.948226  |
| C | -4.193214 | 4.392092  | 0.521968  |
| C | -2.859550 | 3.556342  | 2.406390  |
| C | -2.422620 | -0.381989 | 1.404440  |
| C | -2.812361 | -0.644364 | 2.698117  |
| C | -2.108178 | -1.611397 | 0.669175  |
| S | -2.871327 | -2.339146 | 3.005313  |
| C | -2.357466 | -2.749299 | 1.406405  |
| C | -3.078841 | 0.289850  | 3.834045  |
| C | -2.284073 | -4.213776 | 1.084692  |
| P | -1.243680 | -1.538137 | -0.949832 |
| C | 0.592781  | -5.190882 | -1.274500 |
| C | 0.218357  | -3.910136 | -0.876716 |
| C | -0.102930 | -5.842425 | -2.293604 |
| C | -0.872445 | -3.265209 | -1.476914 |
| C | -1.171618 | -5.198443 | -2.915068 |
| C | -1.553574 | -3.917815 | -2.512124 |
| C | -4.884306 | -1.181294 | -2.859233 |
| C | -3.895884 | -1.528027 | -1.941394 |

|    |           |           |           |
|----|-----------|-----------|-----------|
| C  | -4.565547 | -0.382757 | -3.960056 |
| C  | -2.579252 | -1.080342 | -2.116601 |
| C  | -3.256977 | 0.062669  | -4.142265 |
| C  | -2.266844 | -0.285876 | -3.223244 |
| H  | 2.700932  | 2.603795  | 1.904509  |
| H  | 4.038357  | 4.597754  | 1.333654  |
| H  | 3.438570  | 5.991325  | -0.644693 |
| H  | 0.235065  | 3.280772  | -1.574780 |
| H  | 1.533663  | 5.305006  | -2.100869 |
| H  | 0.670979  | -1.604174 | 4.560977  |
| H  | 0.651981  | -1.110871 | 2.126401  |
| H  | 0.565467  | 0.261552  | 6.212041  |
| H  | 0.404850  | 2.614832  | 5.408697  |
| H  | 0.350308  | 3.100472  | 2.984264  |
| H  | -1.297942 | 3.989531  | 0.037106  |
| H  | -1.892652 | 2.266092  | -1.986726 |
| H  | -2.923048 | 3.704693  | -1.871688 |
| H  | -3.772897 | 0.910955  | -1.381134 |
| H  | -4.767850 | 2.356816  | -1.239258 |
| H  | -5.854253 | 1.956187  | 0.902613  |
| H  | -4.985935 | 1.411470  | 2.351497  |
| H  | -5.216574 | 0.300464  | 0.983507  |
| H  | -3.686849 | 5.369165  | 0.574890  |
| H  | -5.051136 | 4.433932  | 1.211961  |
| H  | -4.594912 | 4.283913  | -0.492937 |
| H  | -2.477827 | 4.584891  | 2.506435  |
| H  | -2.081441 | 2.883565  | 2.785221  |
| H  | -3.741511 | 3.473143  | 3.061483  |
| H  | -3.065992 | 1.328917  | 3.496999  |
| H  | -2.297040 | 0.187330  | 4.603912  |
| H  | -4.049362 | 0.092394  | 4.314853  |
| H  | -2.942439 | -4.781640 | 1.758278  |
| H  | -1.265750 | -4.612669 | 1.205286  |
| H  | -2.601656 | -4.420572 | 0.055855  |
| H  | 1.444711  | -5.675132 | -0.790862 |
| H  | 0.796043  | -3.410185 | -0.096918 |
| H  | 0.194531  | -6.844848 | -2.610956 |
| H  | -1.714659 | -5.692824 | -3.724230 |
| H  | -2.394429 | -3.435597 | -3.013329 |
| H  | -5.909591 | -1.528496 | -2.712075 |
| H  | -4.150886 | -2.140873 | -1.072555 |
| H  | -5.342219 | -0.103586 | -4.675866 |
| H  | -3.005357 | 0.692869  | -4.998393 |
| H  | -1.246187 | 0.080915  | -3.351109 |
| Cu | 0.892532  | -0.416186 | -0.770505 |
| H  | 3.285396  | -1.162413 | -1.889074 |
| H  | 1.853672  | -2.220425 | -2.283481 |
| H  | 0.810229  | -0.368881 | -3.497008 |

121

Figure 1\_ts(CuBadd)\_minor01\_07 / electronic energy: -4987.94846380 a.u. / lowest freq: -106.29 cm<sup>-1</sup>

|   |           |           |           |
|---|-----------|-----------|-----------|
| B | -0.993713 | -2.333504 | -0.157268 |
| O | -0.334271 | -3.450929 | 0.317379  |
| O | -2.328824 | -2.384083 | 0.214329  |
| C | -1.302160 | -4.383382 | 0.823532  |
| C | -2.501380 | -3.440211 | 1.174758  |
| C | -0.711564 | -5.127429 | 2.008921  |
| C | -1.627556 | -5.358512 | -0.307683 |
| C | -2.374853 | -2.809115 | 2.560685  |
| C | -3.879729 | -4.055083 | 0.997153  |
| H | -1.372207 | -2.381701 | 2.705761  |
| H | -2.568481 | -3.537462 | 3.362045  |
| H | -3.106663 | -1.992732 | 2.644838  |
| H | -4.058488 | -4.358749 | -0.042908 |
| H | -4.652634 | -3.322430 | 1.274211  |
| H | -3.999942 | -4.936133 | 1.645977  |
| H | -2.072321 | -4.838825 | -1.169849 |
| H | -2.323386 | -6.144955 | 0.019538  |
| H | -0.698303 | -5.840609 | -0.645924 |
| H | -0.332449 | -4.432563 | 2.768203  |
| H | 0.128863  | -5.755149 | 1.676522  |
| H | -1.463979 | -5.785363 | 2.470965  |
| C | 2.447422  | -0.908002 | -4.350651 |
| C | 3.793690  | -1.159871 | -4.600461 |
| C | 1.751433  | -1.566060 | -3.314590 |
| C | 4.502748  | -2.077326 | -3.822147 |
| C | 2.483575  | -2.499300 | -2.546123 |
| C | 3.831143  | -2.743128 | -2.793362 |
| C | 0.342530  | -1.267696 | -3.061724 |
| C | -0.527903 | -2.183169 | -2.379865 |
| H | 4.369374  | -3.461018 | -2.167861 |
| H | 1.990471  | -3.017303 | -1.718389 |
| H | 5.561739  | -2.267926 | -4.010493 |
| H | 4.298122  | -0.629445 | -5.413318 |
| H | 1.910816  | -0.181163 | -4.968199 |
| P | 1.574447  | -0.255645 | 0.463331  |
| C | 3.341017  | 0.694223  | -1.442979 |
| C | 4.572794  | 1.068256  | -1.977065 |
| C | 3.261728  | 0.093306  | -0.183057 |
| C | 5.744638  | 0.821442  | -1.264210 |
| C | 4.443652  | -0.147158 | 0.529437  |
| C | 5.677459  | 0.208426  | -0.012180 |
| C | 2.828645  | -3.654856 | 2.415739  |
| C | 2.650971  | -2.653416 | 1.464525  |
| C | 1.856529  | -1.535659 | 1.750121  |
| C | 2.200075  | -3.563956 | 3.658805  |
| C | 1.377570  | -2.473647 | 3.935765  |
| C | 1.203475  | -1.469217 | 2.983175  |

|    |           |           |           |
|----|-----------|-----------|-----------|
| C  | 2.307334  | 2.319248  | 1.680832  |
| C  | 1.238427  | 1.264860  | 1.414083  |
| C  | 0.057207  | 1.764212  | 1.841055  |
| C  | 2.036998  | 3.422666  | 0.625710  |
| C  | 0.693734  | 4.005244  | 1.111774  |
| C  | 0.364588  | 3.179693  | 2.398952  |
| C  | -0.668868 | 3.853331  | 3.278241  |
| C  | 1.799424  | 2.972944  | 2.988671  |
| C  | 2.519227  | 4.272936  | 3.366424  |
| C  | 1.900256  | 2.050038  | 4.203718  |
| C  | -1.351816 | 1.270940  | 1.788838  |
| C  | -2.037644 | 1.006269  | 2.950261  |
| C  | -2.240249 | 1.289701  | 0.622174  |
| S  | -3.739600 | 0.903502  | 2.666363  |
| C  | -3.567881 | 1.174146  | 0.963365  |
| C  | -1.526647 | 0.787621  | 4.338409  |
| C  | -4.829733 | 1.258246  | 0.158077  |
| P  | -1.531200 | 1.082473  | -1.056374 |
| C  | -4.524899 | -1.007882 | -2.939271 |
| C  | -3.560863 | -0.584136 | -2.028910 |
| C  | -4.828034 | -0.231673 | -4.059185 |
| C  | -2.894713 | 0.637325  | -2.212256 |
| C  | -4.157452 | 0.972881  | -4.259387 |
| C  | -3.196265 | 1.405969  | -3.343534 |
| C  | -1.585209 | 5.145088  | -1.764574 |
| C  | -1.933542 | 3.871473  | -1.324157 |
| C  | -0.407120 | 5.333917  | -2.491961 |
| C  | -1.109412 | 2.774317  | -1.610683 |
| C  | 0.409748  | 4.245054  | -2.791738 |
| C  | 0.057145  | 2.967316  | -2.354571 |
| H  | 2.423780  | 0.857449  | -2.012970 |
| H  | 4.616250  | 1.538421  | -2.961745 |
| H  | 6.712690  | 1.101603  | -1.686270 |
| H  | 4.405903  | -0.608050 | 1.518702  |
| H  | 6.592916  | 0.011433  | 0.550805  |
| H  | 3.458688  | -4.516199 | 2.181462  |
| H  | 3.142427  | -2.741796 | 0.492598  |
| H  | 2.340427  | -4.350060 | 4.404491  |
| H  | 0.863438  | -2.400455 | 4.897151  |
| H  | 0.543212  | -0.629319 | 3.201218  |
| H  | 3.339822  | 1.951033  | 1.701108  |
| H  | 1.978629  | 2.999635  | -0.385558 |
| H  | 2.839759  | 4.173871  | 0.621265  |
| H  | -0.108530 | 3.907075  | 0.374880  |
| H  | 0.771945  | 5.074629  | 1.357292  |
| H  | -0.341871 | 4.876660  | 3.520733  |
| H  | -0.828754 | 3.323229  | 4.227149  |
| H  | -1.640711 | 3.932119  | 2.766987  |
| H  | 3.589598  | 4.073393  | 3.535011  |
| H  | 2.111596  | 4.675070  | 4.307682  |
| H  | 2.448096  | 5.067953  | 2.614204  |
| H  | 2.949456  | 1.979179  | 4.531185  |
| H  | 1.560668  | 1.028329  | 4.001758  |
| H  | 1.322626  | 2.449141  | 5.052781  |
| H  | -0.465557 | 1.047308  | 4.411237  |
| H  | -1.630538 | -0.272764 | 4.621743  |
| H  | -2.079308 | 1.381756  | 5.082104  |
| H  | -5.600206 | 1.802100  | 0.725547  |
| H  | -5.236588 | 0.263690  | -0.081156 |
| H  | -4.670799 | 1.791094  | -0.786064 |
| H  | -5.039012 | -1.958139 | -2.774486 |
| H  | -3.327770 | -1.205399 | -1.160604 |
| H  | -5.580173 | -0.568370 | -4.776565 |
| H  | -4.380326 | 1.586196  | -5.135865 |
| H  | -2.686657 | 2.354533  | -3.521499 |
| H  | -2.227929 | 5.997079  | -1.531082 |
| H  | -2.847033 | 3.728208  | -0.740663 |
| H  | -0.127563 | 6.335654  | -2.827043 |
| H  | 1.331957  | 4.390026  | -3.358970 |
| H  | 0.697817  | 2.111705  | -2.582967 |
| Cu | -0.055440 | -0.747240 | -1.041889 |
| H  | -0.160094 | -3.199194 | -2.201428 |
| H  | -1.585745 | -2.158127 | -2.661182 |
| H  | -0.119196 | -0.546289 | -3.744070 |

121

Figure 1\_ts(CuBadd)\_minor01\_08 / electronic energy: -4987.94719470 a.u. / lowest freq: -103.80 cm<sup>-1</sup>

|   |           |           |           |
|---|-----------|-----------|-----------|
| B | -2.504839 | 1.208274  | 0.235413  |
| O | -3.521217 | 0.386008  | 0.697330  |
| O | -2.752893 | 2.514714  | 0.618875  |
| C | -4.611137 | 1.195210  | 1.169186  |
| C | -3.901792 | 2.562931  | 1.482897  |
| C | -5.246008 | 0.514629  | 2.372433  |
| C | -5.629538 | 1.295565  | 0.034108  |
| C | -3.394362 | 2.659426  | 2.919401  |
| C | -4.717510 | 3.800776  | 1.139476  |
| H | -2.841875 | 1.756672  | 3.210002  |
| H | -4.219749 | 2.804644  | 3.631619  |
| H | -2.712186 | 3.518751  | 3.003064  |
| H | -4.951493 | 3.849705  | 0.067991  |
| H | -4.147570 | 4.705381  | 1.401038  |
| H | -5.660148 | 3.820098  | 1.707420  |
| H | -5.206003 | 1.790617  | -0.852182 |
| H | -6.527315 | 1.851698  | 0.341124  |
| H | -5.940263 | 0.282202  | -0.261009 |
| H | -4.501842 | 0.279382  | 3.144577  |
| H | -5.715900 | -0.429131 | 2.057856  |
| H | -6.026250 | 1.151254  | 2.816803  |

|    |           |           |           |
|----|-----------|-----------|-----------|
| C  | -1.934349 | -2.050981 | -4.059187 |
| C  | -2.625369 | -3.224592 | -4.351079 |
| C  | -2.332912 | -1.204219 | -3.003237 |
| C  | -3.738629 | -3.600064 | -3.595764 |
| C  | -3.436393 | -1.622929 | -2.224614 |
| C  | -4.128857 | -2.791538 | -2.525939 |
| C  | -1.648876 | 0.065486  | -2.761490 |
| C  | -2.271890 | 1.123333  | -2.027872 |
| H  | -4.979112 | -3.083780 | -1.903354 |
| H  | -3.739951 | -1.031092 | -1.356994 |
| H  | -4.282636 | -4.519255 | -3.826087 |
| H  | -2.294789 | -3.850702 | -5.184837 |
| H  | -1.074503 | -1.763875 | -4.672664 |
| P  | -0.300004 | -1.343795 | 0.602053  |
| C  | -0.939915 | -3.632980 | -0.865492 |
| C  | -1.650635 | -4.793536 | -1.155587 |
| C  | -1.220620 | -2.895264 | 0.294663  |
| C  | -2.685822 | -5.210185 | -0.318175 |
| C  | -2.286486 | -3.297890 | 1.107651  |
| C  | -3.013587 | -4.449054 | 0.801851  |
| C  | -0.309066 | -1.778830 | 4.714977  |
| C  | -0.300711 | -2.063419 | 3.351837  |
| C  | -0.444645 | -1.033630 | 2.410168  |
| C  | -0.440587 | -0.459141 | 5.154266  |
| C  | -0.564536 | 0.570709  | 4.224332  |
| C  | -0.571490 | 0.282660  | 2.858773  |
| C  | 2.080447  | -3.076795 | 0.012656  |
| C  | 1.466774  | -1.783131 | 0.523777  |
| C  | 2.478432  | -0.946399 | 0.845524  |
| C  | 2.665019  | -2.719452 | -1.379649 |
| C  | 3.846244  | -1.800307 | -1.005620 |
| C  | 3.788740  | -1.717909 | 0.553128  |
| C  | 5.076423  | -1.194475 | 1.156568  |
| C  | 3.350664  | -3.184814 | 0.896366  |
| C  | 4.340977  | -4.265593 | 0.448233  |
| C  | 3.025574  | -3.469441 | 2.362681  |
| C  | 2.435819  | 0.449127  | 1.375567  |
| C  | 2.841041  | 0.718983  | 2.663072  |
| C  | 2.053817  | 1.669343  | 0.656864  |
| S  | 2.829625  | 2.411643  | 2.984011  |
| C  | 2.263433  | 2.811209  | 1.400289  |
| C  | 3.170840  | -0.207494 | 3.788901  |
| C  | 2.109603  | 4.273540  | 1.097397  |
| P  | 1.171977  | 1.569939  | -0.951723 |
| C  | -0.771322 | 5.168526  | -1.278143 |
| C  | -0.361422 | 3.898069  | -0.881650 |
| C  | -0.091645 | 5.841892  | -2.293746 |
| C  | 0.748717  | 3.285482  | -1.479672 |
| C  | 0.996734  | 5.229721  | -2.913104 |
| C  | 1.413667  | 3.959705  | -2.511766 |
| C  | 3.200652  | 0.055548  | -4.176692 |
| C  | 2.210459  | 0.361215  | -3.242517 |
| C  | 4.495664  | 0.543192  | -4.005909 |
| C  | 2.509768  | 1.154811  | -2.131772 |
| C  | 4.801188  | 1.340506  | -2.900489 |
| C  | 3.812891  | 1.644167  | -1.967355 |
| H  | -0.165968 | -3.296855 | -1.558791 |
| H  | -1.408952 | -5.362425 | -2.055869 |
| H  | -3.248763 | -6.117197 | -0.550991 |
| H  | -2.558120 | -2.714202 | 1.989323  |
| H  | -3.839218 | -4.751974 | 1.450239  |
| H  | -0.205859 | -2.589776 | 5.439782  |
| H  | -0.181646 | -3.097653 | 3.019508  |
| H  | -0.440913 | -0.236361 | 6.224008  |
| H  | -0.656601 | 1.606903  | 4.557763  |
| H  | -0.667173 | 1.090360  | 2.128533  |
| H  | 1.423915  | -3.954817 | 0.029818  |
| H  | 1.917036  | -2.212835 | -2.006352 |
| H  | 2.991997  | -3.620776 | -1.918427 |
| H  | 3.771997  | -0.805100 | -1.447465 |
| H  | 4.811024  | -2.220772 | -1.324739 |
| H  | 5.931555  | -1.786141 | 0.793897  |
| H  | 5.081624  | -1.243006 | 2.254229  |
| H  | 5.253400  | -0.147027 | 0.865810  |
| H  | 3.868350  | -5.258369 | 0.518662  |
| H  | 5.218408  | -4.276707 | 1.114631  |
| H  | 4.711185  | -4.149223 | -0.577682 |
| H  | 2.677907  | -4.509008 | 2.472256  |
| H  | 2.237267  | -2.819905 | 2.760303  |
| H  | 3.920502  | -3.358858 | 2.995695  |
| H  | 3.239079  | -1.240912 | 3.441818  |
| H  | 2.380319  | -0.172408 | 4.555709  |
| H  | 4.121447  | 0.058289  | 4.276350  |
| H  | 2.744363  | 4.867747  | 1.770986  |
| H  | 1.072806  | 4.615772  | 1.233785  |
| H  | 2.404731  | 4.509042  | 0.068076  |
| H  | -1.637502 | 5.627893  | -0.795508 |
| H  | -0.925205 | 3.382438  | -0.102066 |
| H  | -0.416732 | 6.835970  | -2.610275 |
| H  | 1.528324  | 5.740791  | -3.719522 |
| H  | 2.269009  | 3.503212  | -3.012060 |
| H  | 2.959716  | -0.573651 | -5.036606 |
| H  | 1.200945  | -0.037617 | -3.362572 |
| H  | 5.272125  | 0.298496  | -4.734466 |
| H  | 5.815495  | 1.721991  | -2.762328 |
| H  | 4.057484  | 2.257598  | -1.095959 |
| Cu | -0.918861 | 0.363240  | -0.751866 |



|   |           |          |           |
|---|-----------|----------|-----------|
| H | -3.351050 | 1.048378 | -1.851052 |
| H | -1.954266 | 2.148704 | -2.245926 |
| H | -0.872861 | 0.337693 | -3.481766 |

121

Figure 1\_L-Cu-alkyl\_minor01\_01 / electronic energy: -4988.00887570 a.u. / lowest freq: 18.81 cm-1

|   |           |           |           |
|---|-----------|-----------|-----------|
| B | -3.575252 | 1.605115  | -0.485813 |
| O | -3.441344 | 0.404444  | 0.169565  |
| O | -4.656551 | 2.314891  | -0.012934 |
| C | -4.655420 | 0.170959  | 0.908951  |
| C | -5.164938 | 1.634615  | 1.147125  |
| C | -4.355264 | -0.621769 | 2.169709  |
| C | -5.586019 | -0.639478 | 0.007042  |
| C | -4.532066 | 2.292280  | 2.373306  |
| C | -6.676839 | 1.782810  | 1.195950  |
| H | -3.438811 | 2.169192  | 2.374573  |
| H | -4.931998 | 1.876625  | 3.309569  |
| H | -4.749027 | 3.370416  | 2.353775  |
| H | -7.146881 | 1.467258  | 0.255545  |
| H | -6.943672 | 2.835502  | 1.371999  |
| H | -7.098225 | 1.183522  | 2.017228  |
| H | -5.874926 | -0.076981 | -0.893202 |
| H | -6.502714 | -0.934488 | 0.537733  |
| H | -5.062422 | -1.551522 | -0.312329 |
| H | -3.602810 | -0.135285 | 2.800727  |
| H | -3.979509 | -1.620569 | 1.901687  |
| H | -5.274052 | -0.751165 | 2.761853  |
| C | -1.242113 | -0.536321 | -4.014132 |
| C | -1.637881 | -1.651579 | -4.739511 |
| C | -2.116790 | 0.141712  | -3.124127 |
| C | -2.943405 | -2.149845 | -4.631336 |
| C | -3.437752 | -0.356978 | -3.069366 |
| C | -3.836490 | -1.480515 | -3.796495 |
| C | -1.623074 | 1.261898  | -2.302641 |
| C | -2.664063 | 2.167550  | -1.636167 |
| H | -4.868311 | -1.833993 | -3.705380 |
| H | -4.171774 | 0.132928  | -2.429214 |
| H | -3.254399 | -3.032154 | -5.195734 |
| H | -0.919024 | -2.144812 | -5.400641 |
| H | -0.212566 | -0.175018 | -4.110332 |
| P | -0.304255 | -1.185683 | 0.671187  |
| C | -2.306925 | -2.671354 | -0.511757 |
| C | -3.230926 | -3.708791 | -0.631661 |
| C | -1.505918 | -2.566998 | 0.630054  |
| C | -3.373658 | -4.638017 | 0.398008  |
| C | -1.648941 | -3.505135 | 1.659412  |
| C | -2.582635 | -4.534022 | 1.544472  |
| C | -1.023079 | 0.849521  | 4.129547  |
| C | -1.023215 | 0.398944  | 2.810297  |
| C | -0.223668 | -0.683956 | 2.426852  |
| C | -0.211963 | 0.224750  | 5.076575  |
| C | 0.589120  | -0.855394 | 4.702290  |
| C | 0.582007  | -1.310590 | 3.384861  |
| C | 1.385304  | -3.070704 | -0.761449 |
| C | 1.276140  | -1.981958 | 0.293195  |
| C | 2.523384  | -1.520224 | 0.524981  |
| C | 1.729902  | -2.307177 | -2.071878 |
| C | 3.165531  | -1.809603 | -1.796316 |
| C | 3.475642  | -2.344268 | -0.359421 |
| C | 4.950875  | -2.331877 | -0.017451 |
| C | 2.738108  | -3.725545 | -0.383342 |
| C | 3.276622  | -4.711922 | -1.424363 |
| C | 2.697026  | -4.465251 | 0.956672  |
| C | 2.961693  | -0.331667 | 1.296133  |
| C | 3.700485  | -0.436993 | 2.449126  |
| C | 2.741400  | 1.052641  | 0.902813  |
| S | 4.145872  | 1.125259  | 3.041599  |
| C | 3.357251  | 1.952392  | 1.745114  |
| C | 4.082814  | -1.660684 | 3.219206  |
| C | 3.441217  | 3.446887  | 1.688941  |
| P | 1.674927  | 1.473325  | -0.517806 |
| C | -0.575586 | 4.294673  | 1.419064  |
| C | 0.209622  | 3.180808  | 1.133313  |
| C | -0.710019 | 5.317582  | 0.478419  |
| C | 0.878100  | 3.073420  | -0.094603 |
| C | -0.045331 | 5.219045  | -0.742908 |
| C | 0.742868  | 4.103771  | -1.031099 |
| C | 3.118499  | 2.034332  | -4.296628 |
| C | 2.297683  | 1.800359  | -3.194997 |
| C | 4.474998  | 2.301505  | -4.110742 |
| C | 2.819880  | 1.852134  | -1.894873 |
| C | 5.005298  | 2.338484  | -2.820848 |
| C | 4.182813  | 2.116531  | -1.716561 |
| H | -2.220794 | -1.924456 | -1.304250 |
| H | -3.846971 | -3.779883 | -1.531329 |
| H | -4.105881 | -5.444465 | 0.311044  |
| H | -1.037305 | -3.431638 | 2.562249  |
| H | -2.692499 | -5.260716 | 2.353032  |
| H | -1.652823 | 1.695792  | 4.414889  |
| H | -1.648798 | 0.888289  | 2.059739  |
| H | -0.201064 | 0.581390  | 6.109262  |
| H | 1.226128  | -1.346270 | 5.441898  |
| H | 1.219544  | -2.149048 | 3.096241  |
| H | 0.523633  | -3.747583 | -0.838923 |
| H | 1.017634  | -1.487310 | -2.249647 |
| H | 1.680909  | -2.974540 | -2.944390 |
| H | 3.262297  | -0.717088 | -1.834782 |
| H | 3.889078  | -2.213761 | -2.520135 |

|    |           |           |           |
|----|-----------|-----------|-----------|
| H  | 5.523591  | -2.886835 | -0.776812 |
| H  | 5.156622  | -2.792838 | 0.959095  |
| H  | 5.344444  | -1.303444 | 0.006649  |
| H  | 2.573986  | -5.551927 | -1.544462 |
| H  | 4.236775  | -5.134811 | -1.088434 |
| H  | 3.440366  | -4.276039 | -2.417931 |
| H  | 2.134045  | -5.405827 | 0.848887  |
| H  | 2.216086  | -3.885708 | 1.755157  |
| H  | 3.713270  | -4.731207 | 1.289311  |
| H  | 3.672098  | -2.557130 | 2.739005  |
| H  | 3.687604  | -1.620391 | 4.246583  |
| H  | 5.175176  | -1.779929 | 3.290575  |
| H  | 4.405066  | 3.798868  | 2.085163  |
| H  | 2.642682  | 3.920432  | 2.281831  |
| H  | 3.346061  | 3.810176  | 0.657680  |
| H  | -1.086101 | 4.362861  | 2.382835  |
| H  | 0.312476  | 2.389950  | 1.879800  |
| H  | -1.330061 | 6.189540  | 0.698592  |
| H  | -0.141852 | 6.014397  | -1.485707 |
| H  | 1.247130  | 4.039953  | -1.997853 |
| H  | 2.697336  | 1.993628  | -5.303668 |
| H  | 1.239982  | 1.567685  | -3.342909 |
| H  | 5.122306  | 2.474714  | -4.973647 |
| H  | 6.068776  | 2.538533  | -2.670974 |
| H  | 4.611569  | 2.134821  | -0.712049 |
| Cu | -0.413594 | 0.454154  | -0.891631 |
| H  | -3.360843 | 2.632056  | -2.371463 |
| H  | -2.144152 | 3.036522  | -1.187028 |
| H  | -0.948659 | 1.878338  | -2.924481 |

121

Figure 1 L-Cu-alkyl\_minor01\_02 / electronic energy: -4987.99955082 a.u. / lowest freq: 14.44 cm<sup>-1</sup>

|   |           |           |           |
|---|-----------|-----------|-----------|
| B | 3.817626  | 0.051599  | -2.225777 |
| O | 3.744744  | -0.623994 | -1.027641 |
| O | 4.931589  | -0.312922 | -2.940185 |
| C | 4.982328  | -1.337392 | -0.835590 |
| C | 5.517828  | -1.462710 | -2.307526 |
| C | 4.702021  | -2.668998 | -0.156692 |
| C | 5.868512  | -0.463603 | 0.049378  |
| C | 4.980393  | -2.695742 | -3.033181 |
| C | 7.030240  | -1.394757 | -2.441745 |
| H | 3.888112  | -2.778227 | -2.930260 |
| H | 5.437210  | -3.621194 | -2.654473 |
| H | 5.213167  | -2.609847 | -4.104636 |
| H | 7.430757  | -0.443107 | -2.068905 |
| H | 7.313702  | -1.490804 | -3.500293 |
| H | 7.506258  | -2.217897 | -1.887679 |
| H | 6.116281  | 0.488585  | -0.441794 |
| H | 6.805695  | -0.974650 | 0.312682  |
| H | 5.330747  | -0.226416 | 0.978248  |
| H | 3.923286  | -3.238427 | -0.680921 |
| H | 4.366867  | -2.508808 | 0.877648  |
| H | 5.617050  | -3.279578 | -0.119789 |
| C | 1.944385  | 4.023966  | -0.476865 |
| C | 2.583971  | 5.001748  | 0.273172  |
| C | 2.647845  | 2.950543  | -1.080319 |
| C | 3.971962  | 4.965324  | 0.459037  |
| C | 4.048933  | 2.958705  | -0.905848 |
| C | 4.692602  | 3.936817  | -0.144365 |
| C | 1.917983  | 1.890313  | -1.814051 |
| C | 2.748386  | 1.050219  | -2.788493 |
| H | 5.779706  | 3.892112  | -0.029350 |
| H | 4.660407  | 2.184867  | -1.376232 |
| H | 4.477154  | 5.730000  | 1.053689  |
| H | 1.993970  | 5.806319  | 0.722270  |
| H | 0.857144  | 4.066374  | -0.597267 |
| P | 0.209818  | 0.122816  | 1.586856  |
| C | -2.092225 | 1.277258  | 2.848444  |
| C | -2.811332 | 2.376858  | 3.321738  |
| C | -0.794237 | 1.441783  | 2.363386  |
| C | -2.233887 | 3.644449  | 3.324839  |
| C | -0.216656 | 2.721097  | 2.372617  |
| C | -0.928835 | 3.813736  | 2.856357  |
| C | 2.230473  | -0.473809 | 5.142818  |
| C | 1.239514  | -0.130757 | 4.224613  |
| C | 1.487175  | -0.234027 | 2.850341  |
| C | 3.473745  | -0.923594 | 4.695119  |
| C | 3.728386  | -1.017807 | 3.327296  |
| C | 2.741577  | -0.666907 | 2.405917  |
| C | -0.950413 | -2.457125 | 2.605437  |
| C | -0.689255 | -1.442221 | 1.503375  |
| C | -1.070258 | -2.011610 | 0.339427  |
| C | -2.493154 | -2.555945 | 2.750123  |
| C | -2.919308 | -3.186835 | 1.408553  |
| C | -1.567449 | -3.424439 | 0.663624  |
| C | -1.680014 | -4.404248 | -0.486461 |
| C | -0.614699 | -3.783469 | 1.861587  |
| C | -1.003864 | -5.056195 | 2.619209  |
| C | 0.867126  | -3.911137 | 1.498537  |
| C | -1.123169 | -1.393161 | -1.003533 |
| C | -0.220432 | -1.672280 | -2.002105 |
| C | -2.134496 | -0.436674 | -1.409902 |
| S | -0.610459 | -0.785590 | -3.433948 |
| C | -1.975369 | -0.015035 | -2.712268 |
| C | 1.024170  | -2.499419 | -1.943617 |
| C | -2.766637 | 0.971835  | -3.512822 |
| P | -3.445772 | 0.096379  | -0.252807 |
| C | -2.352810 | 4.028180  | -0.625241 |

|    |           |           |           |
|----|-----------|-----------|-----------|
| C  | -2.347430 | 2.642066  | -0.493236 |
| C  | -3.551676 | 4.709653  | -0.840805 |
| C  | -3.541049 | 1.908435  | -0.580815 |
| C  | -4.742084 | 3.990282  | -0.925772 |
| C  | -4.738314 | 2.600307  | -0.794783 |
| C  | -7.374083 | -0.984943 | -0.699929 |
| C  | -6.174801 | -0.436475 | -0.248904 |
| C  | -7.400514 | -1.739619 | -1.873536 |
| C  | -4.987075 | -0.602690 | -0.980368 |
| C  | -6.220816 | -1.942510 | -2.588011 |
| C  | -5.023468 | -1.378239 | -2.146467 |
| H  | -2.559644 | 0.293708  | 2.834973  |
| H  | -3.832140 | 2.237634  | 3.684880  |
| H  | -2.801179 | 4.504594  | 3.687815  |
| H  | 0.793839  | 2.868619  | 1.978471  |
| H  | -0.468091 | 4.804237  | 2.852441  |
| H  | 2.031311  | -0.388105 | 6.213546  |
| H  | 0.268669  | 0.222290  | 4.582229  |
| H  | 4.249049  | -1.193743 | 5.415799  |
| H  | 4.704923  | -1.357499 | 2.973470  |
| H  | 2.945915  | -0.717996 | 1.331727  |
| H  | -0.411172 | -2.285919 | 3.546648  |
| H  | -2.956257 | -1.576490 | 2.920645  |
| H  | -2.760058 | -3.191463 | 3.606674  |
| H  | -3.582432 | -2.538201 | 0.818788  |
| H  | -3.446355 | -4.142466 | 1.547075  |
| H  | -2.048411 | -5.376341 | -0.123268 |
| H  | -0.717485 | -4.575530 | -0.989852 |
| H  | -2.394192 | -4.042695 | -1.243090 |
| H  | -0.462681 | -5.103501 | 3.577812  |
| H  | -0.715525 | -5.947221 | 2.039289  |
| H  | -2.075590 | -5.143469 | 2.838118  |
| H  | 1.459852  | -4.102315 | 2.407332  |
| H  | 1.275608  | -3.010041 | 1.023845  |
| H  | 1.030640  | -4.761036 | 0.816376  |
| H  | 1.886280  | -1.873998 | -1.662020 |
| H  | 1.242441  | -2.977849 | -2.909602 |
| H  | 0.932355  | -3.286329 | -1.185066 |
| H  | -2.708953 | 0.750349  | -4.588447 |
| H  | -2.385773 | 1.994626  | -3.359614 |
| H  | -3.824536 | 0.966423  | -3.219692 |
| H  | -1.411618 | 4.579180  | -0.558795 |
| H  | -1.395381 | 2.125709  | -0.335336 |
| H  | -3.555667 | 5.797115  | -0.945365 |
| H  | -5.686933 | 4.510987  | -1.099885 |
| H  | -5.683404 | 2.059009  | -0.876787 |
| H  | -8.290790 | -0.832521 | -0.125307 |
| H  | -6.161686 | 0.126673  | 0.689254  |
| H  | -8.337701 | -2.177681 | -2.224728 |
| H  | -6.229083 | -2.542842 | -3.501091 |
| H  | -4.108096 | -1.549900 | -2.716938 |
| Cu | 1.060666  | 0.881711  | -0.333328 |
| H  | 3.252055  | 1.670618  | -3.560517 |
| H  | 2.060592  | 0.401526  | -3.365669 |
| H  | 1.069840  | 2.356560  | -2.348819 |

121

Figure 1\_L-Cu-alkyl\_minor01\_03 / electronic energy: -4988.00110311 a.u. / lowest freq: 19.62 cm-1

|   |           |           |           |
|---|-----------|-----------|-----------|
| B | -3.729150 | -0.361378 | -2.376538 |
| O | -5.021038 | -0.435472 | -1.917782 |
| O | -3.284431 | 0.940942  | -2.407526 |
| C | -5.523242 | 0.896048  | -1.720682 |
| C | -4.197603 | 1.733910  | -1.626179 |
| C | -6.378289 | 0.926521  | -0.463364 |
| C | -6.367453 | 1.245799  | -2.944267 |
| C | -3.625860 | 1.781777  | -0.212992 |
| C | -4.306906 | 3.136248  | -2.203177 |
| H | -3.591717 | 0.779374  | 0.238112  |
| H | -4.209525 | 2.439729  | 0.445855  |
| H | -2.593341 | 2.160888  | -0.257779 |
| H | -4.493316 | 3.117249  | -3.285052 |
| H | -3.379980 | 3.699379  | -2.023990 |
| H | -5.127824 | 3.683628  | -1.715624 |
| H | -5.763234 | 1.249036  | -3.863778 |
| H | -6.848491 | 2.228624  | -2.837722 |
| H | -7.157029 | 0.488919  | -3.061680 |
| H | -5.844550 | 0.510360  | 0.401189  |
| H | -7.291583 | 0.333221  | -0.618110 |
| H | -6.680493 | 1.958057  | -0.226724 |
| C | -1.711064 | -3.884194 | 0.115193  |
| C | -2.194643 | -4.600209 | 1.203157  |
| C | -2.517975 | -2.973831 | -0.615417 |
| C | -3.525973 | -4.462970 | 1.612925  |
| C | -3.866219 | -2.878728 | -0.200622 |
| C | -4.351670 | -3.603552 | 0.889246  |
| C | -1.920671 | -2.147789 | -1.695354 |
| C | -2.862634 | -1.602587 | -2.792170 |
| H | -5.401203 | -3.486928 | 1.176186  |
| H | -4.545545 | -2.206003 | -0.724823 |
| H | -3.909192 | -5.021953 | 2.469819  |
| H | -1.523292 | -5.276011 | 1.740951  |
| H | -0.665003 | -4.011684 | -0.177776 |
| P | -0.359918 | 0.122616  | 1.431017  |
| C | 0.963783  | -2.209710 | 2.198868  |
| C | 1.682621  | -3.041562 | 3.056864  |
| C | 0.570756  | -0.933445 | 2.608963  |
| C | 2.008955  | -2.600725 | 4.337794  |
| C | 0.881256  | -0.505035 | 3.906222  |

|    |           |           |           |
|----|-----------|-----------|-----------|
| C  | 1.602518  | -1.333388 | 4.762965  |
| C  | -3.523938 | 1.884801  | 3.467160  |
| C  | -2.300986 | 1.727174  | 2.811113  |
| C  | -1.880950 | 0.460538  | 2.400105  |
| C  | -4.336277 | 0.780705  | 3.715686  |
| C  | -3.921699 | -0.489568 | 3.307146  |
| C  | -2.703816 | -0.648227 | 2.653524  |
| C  | 1.009989  | 2.634726  | 2.368168  |
| C  | 0.555958  | 1.667674  | 1.284997  |
| C  | 1.106286  | 2.086402  | 0.123880  |
| C  | 2.527389  | 2.345160  | 2.552801  |
| C  | 3.128549  | 2.853037  | 1.225999  |
| C  | 1.889846  | 3.369996  | 0.429544  |
| C  | 2.245655  | 4.260058  | -0.742657 |
| C  | 1.019954  | 3.977625  | 1.583796  |
| C  | 1.680906  | 5.138489  | 2.333110  |
| C  | -0.366748 | 4.458676  | 1.148153  |
| C  | 1.150059  | 1.413319  | -1.197849 |
| C  | 0.430995  | 1.858287  | -2.279871 |
| C  | 2.023061  | 0.294187  | -1.526790 |
| S  | 0.808125  | 0.931497  | -3.689643 |
| C  | 1.956035  | -0.055753 | -2.857997 |
| C  | -0.585390 | 2.948859  | -2.371892 |
| C  | 2.694081  | -1.100552 | -3.637258 |
| P  | 3.042223  | -0.508352 | -0.234148 |
| C  | 1.907933  | -4.291865 | -1.390189 |
| C  | 1.915218  | -2.934788 | -1.076860 |
| C  | 3.098417  | -5.020579 | -1.385171 |
| C  | 3.112576  | -2.273227 | -0.766470 |
| C  | 4.292375  | -4.375671 | -1.067861 |
| C  | 4.300748  | -3.014000 | -0.760367 |
| C  | 7.009892  | 0.382354  | 0.263084  |
| C  | 5.710071  | -0.095879 | 0.420488  |
| C  | 7.358689  | 1.092031  | -0.886651 |
| C  | 4.745936  | 0.104235  | -0.579823 |
| C  | 6.402293  | 1.315500  | -1.876640 |
| C  | 5.105421  | 0.824178  | -1.725663 |
| H  | 0.709171  | -2.556569 | 1.196604  |
| H  | 1.988497  | -4.033765 | 2.716801  |
| H  | 2.576563  | -3.246760 | 5.011767  |
| H  | 0.556659  | 0.478964  | 4.253881  |
| H  | 1.846020  | -0.990274 | 5.771232  |
| H  | -3.843110 | 2.882283  | 3.778669  |
| H  | -1.692957 | 2.606638  | 2.601844  |
| H  | -5.295110 | 0.907952  | 4.223546  |
| H  | -4.552209 | -1.362585 | 3.490494  |
| H  | -2.399023 | -1.646494 | 2.322480  |
| H  | 0.432105  | 2.621802  | 3.301884  |
| H  | 2.710761  | 1.274133  | 2.715107  |
| H  | 2.926966  | 2.885638  | 3.423014  |
| H  | 3.657982  | 2.072764  | 0.666211  |
| H  | 3.848074  | 3.671049  | 1.377171  |
| H  | 2.805982  | 5.142511  | -0.396540 |
| H  | 1.354004  | 4.615099  | -1.279397 |
| H  | 2.882101  | 3.724656  | -1.464295 |
| H  | 1.121160  | 5.356248  | 3.256876  |
| H  | 1.660626  | 6.052219  | 1.718263  |
| H  | 2.725093  | 4.958494  | 2.617173  |
| H  | -0.924398 | 4.845912  | 2.015803  |
| H  | -0.974305 | 3.669152  | 0.688222  |
| H  | -0.280459 | 5.285089  | 0.424722  |
| H  | -0.710302 | 3.441940  | -1.400458 |
| H  | -1.556447 | 2.529504  | -2.670310 |
| H  | -0.296988 | 3.713246  | -3.110160 |
| H  | 2.866294  | -0.766272 | -4.670948 |
| H  | 2.129000  | -2.045145 | -3.680206 |
| H  | 3.668675  | -1.317904 | -3.182598 |
| H  | 0.964600  | -4.782508 | -1.643385 |
| H  | 0.972606  | -2.376903 | -1.095229 |
| H  | 3.093819  | -6.085436 | -1.629176 |
| H  | 5.232617  | -4.932551 | -1.063204 |
| H  | 5.251727  | -2.529722 | -0.528054 |
| H  | 7.749758  | 0.213071  | 1.049050  |
| H  | 5.437353  | -0.625735 | 1.338232  |
| H  | 8.373325  | 1.479210  | -1.006514 |
| H  | 6.665027  | 1.878070  | -2.775809 |
| H  | 4.364790  | 1.017045  | -2.504894 |
| Cu | -0.997983 | -0.853317 | -0.483873 |
| H  | -3.521051 | -2.400533 | -3.193466 |
| H  | -2.229885 | -1.270296 | -3.633210 |
| H  | -1.112665 | -2.730602 | -2.171826 |

121

Figure 1\_L-Cu-alkyl\_minor01\_04 / electronic energy: -4987.99975913 a.u. / lowest freq: 21.32 cm<sup>-1</sup>

|   |           |           |           |
|---|-----------|-----------|-----------|
| B | -3.711598 | -0.758206 | -2.021836 |
| O | -4.465843 | -0.889740 | -0.883057 |
| O | -3.943220 | 0.448120  | -2.640936 |
| C | -5.390576 | 0.207254  | -0.808785 |
| C | -4.718407 | 1.272869  | -1.753356 |
| C | -5.519446 | 0.638405  | 0.642326  |
| C | -6.732004 | -0.299131 | -1.334695 |
| C | -3.734768 | 2.183377  | -1.021809 |
| C | -5.692464 | 2.107141  | -2.569481 |
| H | -2.972521 | 1.594009  | -0.489666 |
| H | -4.242330 | 2.834863  | -0.297222 |
| H | -3.221817 | 2.822320  | -1.753869 |
| H | -6.326449 | 1.482900  | -3.212430 |
| H | -5.133512 | 2.800202  | -3.215586 |

|   |           |           |           |
|---|-----------|-----------|-----------|
| H | -6.339709 | 2.705080  | -1.910130 |
| H | -6.658681 | -0.619491 | -2.384741 |
| H | -7.513997 | 0.470007  | -1.257399 |
| H | -7.045538 | -1.168190 | -0.737667 |
| H | -4.535652 | 0.829358  | 1.087737  |
| H | -6.005814 | -0.156860 | 1.226394  |
| H | -6.130887 | 1.549165  | 0.729813  |
| C | -1.003064 | -4.554390 | -0.603624 |
| C | -1.271661 | -5.695670 | 0.147983  |
| C | -1.959947 | -3.531263 | -0.788540 |
| C | -2.523745 | -5.876682 | 0.739963  |
| C | -3.225209 | -3.747262 | -0.196730 |
| C | -3.496372 | -4.892406 | 0.550907  |
| C | -1.618499 | -2.311872 | -1.565532 |
| C | -2.699287 | -1.822775 | -2.566740 |
| H | -4.487537 | -5.016313 | 0.997689  |
| H | -3.998328 | -2.984316 | -0.309271 |
| H | -2.740516 | -6.772852 | 1.326415  |
| H | -0.498515 | -6.462265 | 0.259050  |
| H | -0.025440 | -4.443801 | -1.082047 |
| P | -0.562560 | 0.566531  | 1.371644  |
| C | 0.705310  | -1.521697 | 2.707711  |
| C | 1.490848  | -2.108469 | 3.700751  |
| C | 0.456278  | -0.146756 | 2.720072  |
| C | 2.023421  | -1.321565 | 4.718888  |
| C | 0.963617  | 0.632675  | 3.768411  |
| C | 1.750249  | 0.048558  | 4.757177  |
| C | -3.643715 | 2.888386  | 2.906724  |
| C | -2.526021 | 2.488442  | 2.172272  |
| C | -1.994896 | 1.205221  | 2.331561  |
| C | -4.247775 | 2.008570  | 3.802112  |
| C | -3.732739 | 0.720275  | 3.956960  |
| C | -2.616699 | 0.321376  | 3.226835  |
| C | 0.658414  | 3.321968  | 1.439229  |
| C | 0.313644  | 2.016032  | 0.736706  |
| C | 0.883657  | 2.067283  | -0.487778 |
| C | 2.186597  | 3.235988  | 1.727591  |
| C | 2.802752  | 3.334805  | 0.318143  |
| C | 1.562648  | 3.439381  | -0.620550 |
| C | 1.897445  | 3.908831  | -2.021070 |
| C | 0.605485  | 4.325831  | 0.250714  |
| C | 1.147704  | 5.719500  | 0.582585  |
| C | -0.785263 | 4.526533  | -0.355474 |
| C | 1.025728  | 0.998698  | -1.507840 |
| C | 0.305689  | 0.987543  | -2.678049 |
| C | 1.995388  | -0.085036 | -1.433373 |
| S | 0.807107  | -0.319363 | -3.691180 |
| C | 1.993135  | -0.873397 | -2.563872 |
| C | -0.807341 | 1.883470  | -3.114618 |
| C | 2.829864  | -2.060257 | -2.929539 |
| P | 3.069885  | -0.269770 | 0.038908  |
| C | 4.795495  | -3.972128 | 0.718167  |
| C | 4.627589  | -2.611391 | 0.460527  |
| C | 3.696979  | -4.829128 | 0.712225  |
| C | 3.359184  | -2.084444 | 0.184079  |
| C | 2.429844  | -4.314807 | 0.435824  |
| C | 2.261265  | -2.957317 | 0.171408  |
| C | 6.251790  | 1.184170  | -2.220630 |
| C | 5.010991  | 0.645609  | -1.878201 |
| C | 7.201718  | 1.446282  | -1.233961 |
| C | 4.701910  | 0.365755  | -0.541637 |
| C | 6.901512  | 1.179959  | 0.102441  |
| C | 5.656286  | 0.656264  | 0.445769  |
| H | 0.278915  | -2.140719 | 1.915375  |
| H | 1.688230  | -3.182398 | 3.669582  |
| H | 2.645621  | -1.775752 | 5.493697  |
| H | 0.741277  | 1.700987  | 3.818368  |
| H | 2.150811  | 0.664656  | 5.565567  |
| H | -4.044865 | 3.895513  | 2.771066  |
| H | -2.079221 | 3.185515  | 1.465060  |
| H | -5.123276 | 2.322132  | 4.375305  |
| H | -4.203554 | 0.019340  | 4.649896  |
| H | -2.224538 | -0.690827 | 3.359391  |
| H | 0.047533  | 3.571925  | 2.316903  |
| H | 2.444902  | 2.293548  | 2.227903  |
| H | 2.509957  | 4.058106  | 2.382283  |
| H | 3.424341  | 2.470787  | 0.057612  |
| H | 3.437274  | 4.225116  | 0.199179  |
| H | 2.369452  | 4.902982  | -1.986826 |
| H | 1.006915  | 3.977387  | -2.662654 |
| H | 2.607986  | 3.221524  | -2.506117 |
| H | 0.503600  | 6.197683  | 1.337797  |
| H | 1.129626  | 6.360862  | -0.312852 |
| H | 2.172854  | 5.729350  | 0.972717  |
| H | -1.415895 | 5.127697  | 0.318637  |
| H | -1.309094 | 3.584907  | -0.556519 |
| H | -0.712803 | 5.079783  | -1.305400 |
| H | -0.898464 | 2.734434  | -2.429276 |
| H | -1.771563 | 1.350905  | -3.112871 |
| H | -0.640477 | 2.277779  | -4.128774 |
| H | 3.005441  | -2.096992 | -4.014785 |
| H | 2.339041  | -3.002810 | -2.638801 |
| H | 3.804283  | -2.026303 | -2.426384 |
| H | 5.795462  | -4.361669 | 0.924051  |
| H | 5.504347  | -1.960541 | 0.470779  |
| H | 3.825920  | -5.894181 | 0.917932  |
| H | 1.562143  | -4.976851 | 0.429811  |

|    |           |           |           |
|----|-----------|-----------|-----------|
| H  | 1.262618  | -2.573004 | -0.059974 |
| H  | 6.475604  | 1.399228  | -3.268288 |
| H  | 4.274563  | 0.455237  | -2.662017 |
| H  | 8.172515  | 1.868122  | -1.504639 |
| H  | 7.635139  | 1.393628  | 0.883351  |
| H  | 5.418529  | 0.476572  | 1.498547  |
| Cu | -1.096148 | -0.926465 | -0.231198 |
| H  | -3.265237 | -2.679856 | -2.991766 |
| H  | -2.188077 | -1.356676 | -3.426285 |
| H  | -0.700645 | -2.532732 | -2.138238 |

121

Figure 1 L-Cu-alkyl\_minor01\_05 / electronic energy: -4987.99842918 a.u. / lowest freq: 21.17 cm<sup>-1</sup>

|   |           |           |           |
|---|-----------|-----------|-----------|
| B | 3.403019  | -1.957775 | -0.448326 |
| O | 4.272409  | -1.188418 | 0.283907  |
| O | 2.726654  | -2.846292 | 0.358934  |
| C | 4.297367  | -1.677589 | 1.636813  |
| C | 2.938628  | -2.460382 | 1.727233  |
| C | 4.403568  | -0.494550 | 2.582507  |
| C | 5.520590  | -2.581671 | 1.766627  |
| C | 1.766430  | -1.565956 | 2.116863  |
| C | 2.965037  | -3.704046 | 2.599817  |
| H | 1.733276  | -0.665764 | 1.486789  |
| H | 1.820405  | -1.252852 | 3.169206  |
| H | 0.829684  | -2.119046 | 1.967171  |
| H | 3.692660  | -4.442161 | 2.237589  |
| H | 1.971165  | -4.176376 | 2.600205  |
| H | 3.215078  | -3.444652 | 3.639745  |
| H | 5.453539  | -3.448709 | 1.092494  |
| H | 5.646668  | -2.947894 | 2.795867  |
| H | 6.419679  | -2.009968 | 1.493058  |
| H | 3.624613  | 0.247667  | 2.372722  |
| H | 5.380781  | -0.003620 | 2.462343  |
| H | 4.310443  | -0.819214 | 3.629986  |
| C | 2.356989  | 1.346219  | -3.825154 |
| C | 2.889658  | 2.604269  | -4.090642 |
| C | 2.793918  | 0.555309  | -2.736569 |
| C | 3.903967  | 3.133092  | -3.288645 |
| C | 3.842450  | 1.100500  | -1.959158 |
| C | 4.377881  | 2.358723  | -2.227742 |
| C | 2.173374  | -0.757725 | -2.445208 |
| C | 3.172199  | -1.862897 | -1.995240 |
| H | 5.179388  | 2.742674  | -1.588873 |
| H | 4.224134  | 0.534918  | -1.107075 |
| H | 4.322766  | 4.121365  | -3.493071 |
| H | 2.507255  | 3.181027  | -4.937978 |
| H | 1.562419  | 0.957417  | -4.470993 |
| P | 0.316986  | 1.586452  | 0.125421  |
| C | -0.264077 | 2.631062  | -2.356080 |
| C | -0.482274 | 3.614644  | -3.318653 |
| C | 0.226915  | 2.962790  | -1.088683 |
| C | -0.180772 | 4.944374  | -3.031611 |
| C | 0.525292  | 4.301743  | -0.808317 |
| C | 0.331848  | 5.283711  | -1.778355 |
| C | 3.632018  | 3.141583  | 2.011684  |
| C | 2.707393  | 2.762692  | 1.040076  |
| C | 1.499617  | 2.154013  | 1.408800  |
| C | 3.372024  | 2.904624  | 3.361944  |
| C | 2.190383  | 2.263891  | 3.733201  |
| C | 1.263719  | 1.886153  | 2.762175  |
| C | -2.201400 | 2.978454  | 0.812874  |
| C | -1.315073 | 1.743576  | 0.921401  |
| C | -2.036546 | 0.774802  | 1.525793  |
| C | -3.241718 | 2.622088  | -0.282551 |
| C | -4.074945 | 1.526034  | 0.411856  |
| C | -3.425242 | 1.392267  | 1.827960  |
| C | -4.327263 | 0.691072  | 2.822525  |
| C | -3.043378 | 2.885941  | 2.110188  |
| C | -4.240432 | 3.843107  | 2.160584  |
| C | -2.228785 | 3.147624  | 3.377063  |
| C | -1.727936 | -0.652329 | 1.839501  |
| C | -1.628846 | -1.062740 | 3.149098  |
| C | -1.708072 | -1.785299 | 0.906845  |
| S | -1.614154 | -2.783946 | 3.269108  |
| C | -1.704679 | -3.002196 | 1.555116  |
| C | -1.506886 | -0.258184 | 4.404309  |
| C | -1.760679 | -4.420873 | 1.069267  |
| P | -1.386019 | -1.520915 | -0.883656 |
| C | 0.512841  | -4.979436 | -1.965187 |
| C | 0.176820  | -3.760342 | -1.382735 |
| C | -0.378988 | -5.613252 | -2.832171 |
| C | -1.068090 | -3.169351 | -1.637077 |
| C | -1.607738 | -5.017502 | -3.111233 |
| C | -1.952416 | -3.801859 | -2.518129 |
| C | -5.425662 | -1.332045 | -1.675009 |
| C | -4.200115 | -1.663723 | -1.103674 |
| C | -5.479170 | -0.422696 | -2.733822 |
| C | -3.015760 | -1.092970 | -1.589889 |
| C | -4.303971 | 0.140419  | -3.229012 |
| C | -3.074968 | -0.197939 | -2.661749 |
| H | -0.467653 | 1.581753  | -2.589687 |
| H | -0.870297 | 3.336010  | -4.301094 |
| H | -0.337048 | 5.718221  | -3.786988 |
| H | 0.904344  | 4.587765  | 0.175398  |
| H | 0.573412  | 6.324468  | -1.550074 |
| H | 4.564267  | 3.623380  | 1.707803  |
| H | 2.928749  | 2.944433  | -0.013735 |
| H | 4.096809  | 3.205689  | 4.121700  |

|    |           |           |           |
|----|-----------|-----------|-----------|
| H  | 1.985879  | 2.053857  | 4.785782  |
| H  | 0.351197  | 1.367174  | 3.059655  |
| H  | -1.674746 | 3.926979  | 0.651260  |
| H  | -2.753047 | 2.268050  | -1.199974 |
| H  | -3.847875 | 3.498767  | -0.553545 |
| H  | -4.047458 | 0.569535  | -0.115247 |
| H  | -5.134445 | 1.805372  | 0.507434  |
| H  | -5.302960 | 1.199537  | 2.865949  |
| H  | -3.913303 | 0.685217  | 3.840179  |
| H  | -4.511623 | -0.353788 | 2.527584  |
| H  | -3.888485 | 4.884739  | 2.087783  |
| H  | -4.763497 | 3.742920  | 3.124900  |
| H  | -4.983748 | 3.690958  | 1.368427  |
| H  | -2.028608 | 4.226099  | 3.475323  |
| H  | -1.258027 | 2.641287  | 3.379024  |
| H  | -2.785991 | 2.839282  | 4.276179  |
| H  | -1.641886 | 0.808189  | 4.200761  |
| H  | -0.508816 | -0.388759 | 4.853063  |
| H  | -2.247435 | -0.559767 | 5.160716  |
| H  | -2.231229 | -5.059612 | 1.831125  |
| H  | -0.757624 | -4.827717 | 0.870205  |
| H  | -2.346382 | -4.512763 | 0.147680  |
| H  | 1.482898  | -5.431687 | -1.745068 |
| H  | 0.891515  | -3.275985 | -0.712469 |
| H  | -0.112823 | -6.565492 | -3.296981 |
| H  | -2.308190 | -5.499527 | -3.797404 |
| H  | -2.921783 | -3.356209 | -2.747709 |
| H  | -6.344592 | -1.776545 | -1.286195 |
| H  | -4.163329 | -2.361883 | -0.263092 |
| H  | -6.441708 | -0.154552 | -3.175521 |
| H  | -4.341906 | 0.851939  | -4.056903 |
| H  | -2.156108 | 0.244389  | -3.054264 |
| Cu | 0.630310  | -0.337090 | -1.157758 |
| H  | 4.143858  | -1.753523 | -2.519809 |
| H  | 2.765052  | -2.838123 | -2.310676 |
| H  | 1.675777  | -1.105974 | -3.367949 |

121

Figure 1\_pcl\_minor02\_01 / electronic energy: -4987.96129307 a.u. / lowest freq: 14.50 cm-1

|   |           |           |           |
|---|-----------|-----------|-----------|
| B | -2.113803 | 1.774171  | 0.474850  |
| O | -2.096608 | 3.170392  | 0.435813  |
| O | -3.296122 | 1.375002  | 1.113072  |
| C | -3.135958 | 3.692147  | 1.274347  |
| C | -4.156489 | 2.506119  | 1.300177  |
| C | -3.670817 | 4.983294  | 0.674409  |
| C | -2.510443 | 3.967516  | 2.643459  |
| C | -5.135077 | 2.534466  | 0.125227  |
| C | -4.917136 | 2.348398  | 2.608249  |
| H | -4.607335 | 2.663699  | -0.831495 |
| H | -5.878175 | 3.339786  | 0.227139  |
| H | -5.672271 | 1.575631  | 0.081858  |
| H | -4.238841 | 2.147333  | 3.448234  |
| H | -5.623670 | 1.507684  | 2.534261  |
| H | -5.496993 | 3.256207  | 2.837254  |
| H | -2.130176 | 3.040279  | 3.098113  |
| H | -3.224570 | 4.433373  | 3.338904  |
| H | -1.658929 | 4.652275  | 2.514973  |
| H | -3.973243 | 4.846806  | -0.372275 |
| H | -2.890907 | 5.759309  | 0.700914  |
| H | -4.536958 | 5.352798  | 1.244905  |
| C | -4.944596 | -2.025904 | -3.156584 |
| C | -5.885582 | -2.563978 | -2.278618 |
| C | -3.972908 | -1.120141 | -2.705674 |
| C | -5.868893 | -2.207123 | -0.930854 |
| C | -3.962267 | -0.778145 | -1.343931 |
| C | -4.900847 | -1.312428 | -0.468527 |
| C | -3.002988 | -0.560067 | -3.668406 |
| C | -2.087576 | 0.384846  | -3.420072 |
| H | -4.862309 | -1.023278 | 0.584143  |
| H | -3.211526 | -0.090968 | -0.947997 |
| H | -6.604496 | -2.627623 | -0.240638 |
| H | -6.635426 | -3.266650 | -2.650610 |
| H | -4.964939 | -2.307924 | -4.213303 |
| F | 1.280916  | 0.838744  | -1.419543 |
| C | 0.423822  | 3.375966  | -2.156725 |
| C | 0.478806  | 4.593755  | -2.835206 |
| C | 1.401251  | 2.397841  | -2.383675 |
| C | 1.499331  | 4.839120  | -3.753681 |
| C | 2.423199  | 2.649942  | -3.307289 |
| C | 2.470804  | 3.864922  | -3.989241 |
| C | 1.932691  | -2.039090 | -4.249896 |
| C | 1.352740  | -1.091452 | -3.407830 |
| C | 2.133092  | -0.387801 | -2.480454 |
| C | 3.301143  | -2.296763 | -4.171591 |
| C | 4.087362  | -1.593111 | -3.259024 |
| C | 3.508293  | -0.641722 | -2.420690 |
| C | 2.504010  | 2.497698  | 0.669803  |
| C | 2.369838  | 1.134722  | 0.004983  |
| C | 2.883137  | 0.218798  | 0.855107  |
| C | 1.464836  | 2.493194  | 1.822605  |
| C | 2.044942  | 1.433265  | 2.783715  |
| C | 3.377876  | 0.988161  | 2.091799  |
| C | 4.335658  | 0.286422  | 3.031981  |
| C | 3.843977  | 2.332066  | 1.434752  |
| C | 4.144077  | 3.451116  | 2.436808  |
| C | 5.057428  | 2.225793  | 0.508040  |
| C | 2.865918  | -1.262187 | 0.766437  |
| C | 4.014750  | -1.998680 | 0.596551  |

|    |           |           |           |
|----|-----------|-----------|-----------|
| C  | 1.685301  | -2.102338 | 0.898002  |
| S  | 3.669537  | -3.691220 | 0.611619  |
| C  | 1.978549  | -3.448078 | 0.860492  |
| C  | 5.417291  | -1.536510 | 0.359611  |
| C  | 1.094931  | -4.648478 | 1.013201  |
| P  | 0.009082  | -1.387852 | 1.027691  |
| C  | -2.972608 | -4.137244 | 0.161454  |
| C  | -2.134671 | -3.279264 | 0.874933  |
| C  | -2.780486 | -4.338823 | -1.204224 |
| C  | -1.091672 | -2.615974 | 0.223623  |
| C  | -1.743335 | -3.673894 | -1.860207 |
| C  | -0.911212 | -2.812336 | -1.151951 |
| C  | 0.042513  | -2.130794 | 5.099634  |
| C  | 0.379817  | -2.154322 | 3.745972  |
| C  | -1.082402 | -1.427480 | 5.529079  |
| C  | -0.403458 | -1.468428 | 2.810646  |
| C  | -1.867882 | -0.741862 | 4.601009  |
| C  | -1.526847 | -0.750912 | 3.249514  |
| H  | -0.377971 | 3.187219  | -1.435317 |
| H  | -0.285853 | 5.351320  | -2.647628 |
| H  | 1.537858  | 5.790801  | -4.289162 |
| H  | 3.188684  | 1.894301  | -3.500114 |
| H  | 3.270472  | 4.051107  | -4.710188 |
| H  | 1.309939  | -2.583009 | -4.963825 |
| H  | 0.278155  | -0.899194 | -3.471758 |
| H  | 3.756309  | -3.045135 | -4.824633 |
| H  | 5.161511  | -1.784326 | -3.199084 |
| H  | 4.131843  | -0.093144 | -1.713403 |
| H  | 2.436822  | 3.361277  | -0.005772 |
| H  | 0.459721  | 2.242865  | 1.454021  |
| H  | 1.399357  | 3.485231  | 2.292525  |
| H  | 1.375901  | 0.574251  | 2.930652  |
| H  | 2.251630  | 1.848135  | 3.781767  |
| H  | 4.544866  | 0.921724  | 3.906784  |
| H  | 5.296928  | 0.052264  | 2.553322  |
| H  | 3.905539  | -0.656458 | 3.405278  |
| H  | 4.213171  | 4.417663  | 1.912339  |
| H  | 5.116412  | 3.275926  | 2.924101  |
| H  | 3.395600  | 3.560396  | 3.231839  |
| H  | 5.282438  | 3.212017  | 0.072154  |
| H  | 4.900770  | 1.530069  | -0.325708 |
| H  | 5.952620  | 1.902453  | 1.063163  |
| H  | 5.456721  | -0.442179 | 0.315194  |
| H  | 5.807045  | -1.925083 | -0.594634 |
| H  | 6.101656  | -1.871258 | 1.154830  |
| H  | 1.681089  | -5.530657 | 1.308640  |
| H  | 0.573761  | -4.890188 | 0.073804  |
| H  | 0.330420  | -4.478860 | 1.783155  |
| H  | -3.788233 | -4.647617 | 0.679202  |
| H  | -2.297346 | -3.134360 | 1.945272  |
| H  | -3.443571 | -5.005416 | -1.760072 |
| H  | -1.587408 | -3.816830 | -2.932122 |
| H  | -0.103310 | -2.292082 | -1.670929 |
| H  | 0.664816  | -2.665198 | 5.821346  |
| H  | 1.267776  | -2.701532 | 3.420246  |
| H  | -1.343661 | -1.407886 | 6.589905  |
| H  | -2.747507 | -0.184645 | 4.932166  |
| H  | -2.134464 | -0.189097 | 2.532643  |
| Cu | -0.611373 | 0.532717  | -0.118835 |
| H  | -3.074876 | -0.966600 | -4.684263 |
| H  | -1.957816 | 0.838568  | -2.430787 |
| H  | -1.426369 | 0.742329  | -4.214164 |

121

Figure 1\_pcl\_minor02\_02 / electronic energy: -4987.94484714 a.u. / lowest freq: 4.40 cm<sup>-1</sup>

|   |           |           |           |
|---|-----------|-----------|-----------|
| B | -3.003931 | 1.201832  | -0.893950 |
| O | -2.949543 | 2.589522  | -0.917297 |
| O | -4.338697 | 0.801919  | -0.941141 |
| C | -4.265134 | 3.125368  | -0.721042 |
| C | -5.172093 | 1.941895  | -1.202191 |
| C | -4.405814 | 4.410396  | -1.523057 |
| C | -4.414386 | 3.423436  | 0.771595  |
| C | -5.439456 | 1.970999  | -2.707469 |
| C | -6.482289 | 1.790465  | -0.444497 |
| H | -4.505464 | 2.100747  | -3.274259 |
| H | -6.133342 | 2.777761  | -2.986591 |
| H | -5.888107 | 1.013017  | -3.010004 |
| H | -6.312024 | 1.612560  | 0.625578  |
| H | -7.047769 | 0.935141  | -0.844027 |
| H | -7.105292 | 2.691384  | -0.555036 |
| H | -4.311343 | 2.506884  | 1.370933  |
| H | -5.383298 | 3.890295  | 1.002687  |
| H | -3.618342 | 4.117175  | 1.079950  |
| H | -4.171006 | 4.256395  | -2.584500 |
| H | -3.711589 | 5.169292  | -1.131377 |
| H | -5.427434 | 4.813634  | -1.444977 |
| C | 0.173117  | -3.284746 | -3.223507 |
| C | -0.113364 | -4.627834 | -3.455821 |
| C | -0.836499 | -2.379430 | -2.853266 |
| C | -1.415617 | -5.107197 | -3.307586 |
| C | -2.141027 | -2.882198 | -2.685952 |
| C | -2.424317 | -4.226527 | -2.912109 |
| C | -0.514356 | -0.951771 | -2.700673 |
| C | -1.442470 | 0.063613  | -2.936123 |
| H | -3.444504 | -4.592735 | -2.771006 |
| H | -2.943299 | -2.211124 | -2.366469 |
| H | -1.640690 | -6.161128 | -3.486998 |
| H | 0.688507  | -5.307531 | -3.756016 |



|    |           |           |           |
|----|-----------|-----------|-----------|
| H  | 1.195833  | -2.916404 | -3.345951 |
| P  | 2.696344  | -0.016254 | -1.026227 |
| C  | 1.980202  | 1.444825  | -3.334526 |
| C  | 2.136644  | 1.886797  | -4.646749 |
| C  | 2.988305  | 0.707377  | -2.694297 |
| C  | 3.302824  | 1.591440  | -5.352272 |
| C  | 4.149672  | 0.404113  | -3.420628 |
| C  | 4.305978  | 0.845284  | -4.734591 |
| C  | 6.582554  | 0.768887  | 0.210851  |
| C  | 5.327759  | 0.911853  | -0.376389 |
| C  | 4.404047  | -0.143919 | -0.345595 |
| C  | 6.928576  | -0.429849 | 0.840513  |
| C  | 6.020222  | -1.485988 | 0.872087  |
| C  | 4.764929  | -1.343555 | 0.277022  |
| C  | 1.730468  | 2.820676  | -0.417505 |
| C  | 2.024746  | 1.374760  | -0.042568 |
| C  | 1.616599  | 1.215364  | 1.232501  |
| C  | 0.181690  | 2.905857  | -0.520476 |
| C  | -0.266770 | 2.736982  | 0.946935  |
| C  | 1.073102  | 2.565977  | 1.722932  |
| C  | 0.941071  | 2.750862  | 3.220074  |
| C  | 2.001698  | 3.551072  | 0.929217  |
| C  | 1.548371  | 5.015366  | 0.952026  |
| C  | 3.470080  | 3.537037  | 1.352472  |
| C  | 1.660847  | -0.017087 | 2.054203  |
| C  | 2.708543  | -0.263905 | 2.913202  |
| C  | 0.639955  | -1.046606 | 2.113835  |
| S  | 2.446279  | -1.721623 | 3.792830  |
| C  | 0.926093  | -2.027891 | 3.045501  |
| C  | 3.959668  | 0.523298  | 3.151517  |
| C  | 0.144908  | -3.217845 | 3.518263  |
| P  | -0.911862 | -1.013815 | 1.138751  |
| C  | -0.369699 | -4.897690 | 0.000619  |
| C  | -0.218640 | -3.533558 | 0.224238  |
| C  | -1.556155 | -5.540355 | 0.358921  |
| C  | -1.237273 | -2.800122 | 0.848121  |
| C  | -2.589487 | -4.806512 | 0.936816  |
| C  | -2.431481 | -3.441576 | 1.183522  |
| C  | -4.455967 | 0.076042  | 2.919244  |
| C  | -3.489668 | -0.339289 | 2.004985  |
| C  | -4.098037 | 0.376999  | 4.233533  |
| C  | -2.152093 | -0.489331 | 2.399433  |
| C  | -2.767975 | 0.249704  | 4.629479  |
| C  | -1.802489 | -0.186223 | 3.721335  |
| H  | 1.053365  | 1.677949  | -2.808281 |
| H  | 1.337317  | 2.462453  | -5.119538 |
| H  | 3.427592  | 1.937541  | -6.380989 |
| H  | 4.947980  | -0.181881 | -2.959217 |
| H  | 5.222338  | 0.602412  | -5.278225 |
| H  | 7.294640  | 1.597098  | 0.182813  |
| H  | 5.062783  | 1.852530  | -0.865653 |
| H  | 7.910844  | -0.538722 | 1.306586  |
| H  | 6.285195  | -2.425100 | 1.363409  |
| H  | 4.049811  | -2.170036 | 0.310014  |
| H  | 2.272449  | 3.210445  | -1.289138 |
| H  | -0.233825 | 2.116890  | -1.162245 |
| H  | -0.144246 | 3.864944  | -0.945799 |
| H  | -0.933994 | 1.876941  | 1.088133  |
| H  | -0.813269 | 3.616456  | 1.316210  |
| H  | 0.548413  | 3.753434  | 3.451333  |
| H  | 1.902997  | 2.635244  | 3.741153  |
| H  | 0.237734  | 2.017036  | 3.644363  |
| H  | 2.127439  | 5.598576  | 0.218003  |
| H  | 1.741529  | 5.458795  | 1.941922  |
| H  | 0.485786  | 5.169885  | 0.727809  |
| H  | 4.058615  | 4.202867  | 0.700733  |
| H  | 3.921257  | 2.541360  | 1.300115  |
| H  | 3.583913  | 3.909111  | 2.383500  |
| H  | 4.478793  | 0.728561  | 2.206179  |
| H  | 4.655658  | -0.025248 | 3.801503  |
| H  | 3.745569  | 1.488706  | 3.633878  |
| H  | 0.517525  | -3.559355 | 4.494795  |
| H  | 0.219912  | -4.061596 | 2.816110  |
| H  | -0.919976 | -2.974707 | 3.633510  |
| H  | 0.439574  | -5.459663 | -0.470160 |
| H  | 0.709162  | -3.035296 | -0.070256 |
| H  | -1.677789 | -6.610496 | 0.176236  |
| H  | -3.525935 | -5.298424 | 1.210070  |
| H  | -3.241013 | -2.891821 | 1.667288  |
| H  | -5.494521 | 0.177942  | 2.595613  |
| H  | -3.783442 | -0.525301 | 0.970303  |
| H  | -4.853697 | 0.715309  | 4.946318  |
| H  | -2.474677 | 0.488263  | 5.654510  |
| H  | -0.767510 | -0.285239 | 4.053128  |
| Cu | -1.391423 | -0.061539 | -0.920522 |
| H  | 0.550134  | -0.708348 | -2.717259 |
| H  | -2.441663 | -0.171842 | -3.314856 |
| H  | -1.095129 | 1.073477  | -3.173225 |

121

Figure 1\_pcl\_minor02\_03 / electronic energy: -4987.95227656 a.u. / lowest freq: 8.20 cm<sup>-1</sup>

|   |          |          |           |
|---|----------|----------|-----------|
| B | 1.549476 | 2.284059 | -0.076041 |
| O | 0.933588 | 3.528602 | 0.009866  |
| O | 2.798639 | 2.450322 | -0.676052 |
| C | 1.678953 | 4.498382 | -0.743061 |
| C | 3.104542 | 3.848995 | -0.784807 |
| C | 1.606743 | 5.840938 | -0.031377 |
| C | 1.033014 | 4.605906 | -2.124217 |

|   |           |           |           |
|---|-----------|-----------|-----------|
| C | 3.962719  | 4.221031  | 0.423690  |
| C | 3.881972  | 4.089316  | -2.069451 |
| H | 3.414002  | 4.077490  | 1.366185  |
| H | 4.303946  | 5.265840  | 0.377306  |
| H | 4.850591  | 3.571317  | 0.447259  |
| H | 3.357444  | 3.681973  | -2.944081 |
| H | 4.863914  | 3.596831  | -2.005662 |
| H | 4.051990  | 5.164619  | -2.232368 |
| H | 1.065966  | 3.643888  | -2.657165 |
| H | 1.525538  | 5.369548  | -2.744122 |
| H | -0.022705 | 4.889666  | -2.006965 |
| H | 1.911513  | 5.759641  | 1.020237  |
| H | 0.573884  | 6.220211  | -0.054746 |
| H | 2.250643  | 6.583544  | -0.527221 |
| C | 3.438098  | -1.915206 | 3.365635  |
| C | 4.617567  | -2.655036 | 3.317121  |
| C | 3.209489  | -0.850442 | 2.476249  |
| C | 5.594842  | -2.362073 | 2.365435  |
| C | 4.193449  | -0.583968 | 1.503181  |
| C | 5.368723  | -1.327477 | 1.454107  |
| C | 2.007440  | -0.019800 | 2.615163  |
| C | 1.991439  | 1.323044  | 2.251564  |
| H | 6.115619  | -1.101981 | 0.688569  |
| H | 4.024810  | 0.211022  | 0.770748  |
| H | 6.520790  | -2.940685 | 2.325284  |
| H | 4.775437  | -3.466911 | 4.032228  |
| H | 2.682759  | -2.147673 | 4.122074  |
| P | -1.321019 | 0.421043  | 1.512106  |
| C | -2.409886 | 1.563449  | 3.902786  |
| C | -2.640168 | 2.634923  | 4.767607  |
| C | -1.769795 | 1.767317  | 2.674582  |
| C | -2.234550 | 3.921430  | 4.416913  |
| C | -1.337938 | 3.062222  | 2.340440  |
| C | -1.581828 | 4.130780  | 3.200860  |
| C | -1.626654 | -3.387572 | 2.984522  |
| C | -1.145554 | -2.167870 | 2.507333  |
| C | -2.020046 | -1.109851 | 2.244145  |
| C | -2.991580 | -3.555517 | 3.208523  |
| C | -3.873087 | -2.500870 | 2.959163  |
| C | -3.391305 | -1.287672 | 2.474246  |
| C | -2.870616 | 1.995454  | -0.488831 |
| C | -2.366270 | 0.668811  | 0.053190  |
| C | -2.590230 | -0.270979 | -0.887971 |
| C | -1.871028 | 2.386274  | -1.609689 |
| C | -2.145509 | 1.315563  | -2.685914 |
| C | -3.285508 | 0.442966  | -2.065759 |
| C | -4.011668 | -0.405115 | -3.089466 |
| C | -4.111020 | 1.536879  | -1.301265 |
| C | -4.713199 | 2.616014  | -2.207937 |
| C | -5.248869 | 1.020770  | -0.418668 |
| C | -2.189910 | -1.703702 | -0.906435 |
| C | -3.143483 | -2.693746 | -0.857700 |
| C | -0.839319 | -2.240816 | -1.078149 |
| S | -2.438277 | -4.247902 | -1.090241 |
| C | -0.841114 | -3.610923 | -1.256771 |
| C | -4.614101 | -2.596013 | -0.605166 |
| C | 0.222402  | -4.605581 | -1.623063 |
| P | 0.664599  | -1.169692 | -1.005818 |
| C | 4.149571  | -3.334499 | -1.589784 |
| C | 3.096818  | -2.437537 | -1.777343 |
| C | 4.189519  | -4.144733 | -0.457274 |
| C | 2.074603  | -2.337837 | -0.827859 |
| C | 3.188566  | -4.028879 | 0.507896  |
| C | 2.153460  | -3.116901 | 0.333614  |
| C | 0.323524  | -0.859662 | -5.116028 |
| C | 0.211085  | -1.316417 | -3.803849 |
| C | 1.060420  | 0.291345  | -5.396305 |
| C | 0.828167  | -0.622368 | -2.755141 |
| C | 1.695973  | 0.973875  | -4.359332 |
| C | 1.579881  | 0.522359  | -3.044755 |
| H | -2.730106 | 0.562519  | 4.198673  |
| H | -3.140155 | 2.458821  | 5.723112  |
| H | -2.416850 | 4.758259  | 5.095421  |
| H | -0.785923 | 3.236219  | 1.411127  |
| H | -1.244292 | 5.132698  | 2.923917  |
| H | -0.931276 | -4.208467 | 3.174658  |
| H | -0.078603 | -2.034400 | 2.315577  |
| H | -3.373210 | -4.510073 | 3.578952  |
| H | -4.943844 | -2.629894 | 3.133571  |
| H | -4.090366 | -0.474653 | 2.263871  |
| H | -3.051026 | 2.777649  | 0.260323  |
| H | -0.840112 | 2.376403  | -1.238282 |
| H | -2.077609 | 3.402159  | -1.977019 |
| H | -1.267580 | 0.701832  | -2.911991 |
| H | -2.476744 | 1.758450  | -3.637253 |
| H | -4.375999 | 0.225428  | -3.915593 |
| H | -4.878477 | -0.928496 | -2.662545 |
| H | -3.340907 | -1.163220 | -3.523451 |
| H | -5.053703 | 3.470946  | -1.601746 |
| H | -5.596327 | 2.218974  | -2.733249 |
| H | -4.027232 | 3.005325  | -2.970403 |
| H | -5.745408 | 1.867122  | 0.081979  |
| H | -4.905808 | 0.333981  | 0.363986  |
| H | -6.014319 | 0.504643  | -1.020084 |
| H | -4.900606 | -1.557934 | -0.409797 |
| H | -4.898759 | -3.191013 | 0.276540  |
| H | -5.204076 | -2.964868 | -1.458836 |

|    |           |           |           |
|----|-----------|-----------|-----------|
| H  | 0.978297  | -4.167073 | -2.285036 |
| H  | -0.230218 | -5.456768 | -2.152388 |
| H  | 0.742551  | -5.004519 | -0.740332 |
| H  | 4.936730  | -3.404932 | -2.344273 |
| H  | 3.069403  | -1.830888 | -2.684583 |
| H  | 5.006181  | -4.856980 | -0.318295 |
| H  | 3.220115  | -4.644270 | 1.409223  |
| H  | 1.377272  | -3.034242 | 1.097741  |
| H  | -0.173591 | -1.402825 | -5.923238 |
| H  | -0.380017 | -2.210893 | -3.595157 |
| H  | 1.141439  | 0.654789  | -6.423551 |
| H  | 2.280942  | 1.872287  | -4.571651 |
| H  | 2.076392  | 1.070535  | -2.240944 |
| Cu | 0.907769  | 0.485070  | 0.667798  |
| H  | 1.237361  | -0.387987 | 3.299336  |
| H  | 2.922241  | 1.805264  | 1.941019  |
| H  | 1.253841  | 1.995309  | 2.698645  |

121

Figure 1\_pcl\_minor02\_04 / electronic energy: -4987.93892719 a.u. / lowest freq: 7.92 cm<sup>-1</sup>

|   |           |           |           |
|---|-----------|-----------|-----------|
| B | -2.299604 | 2.033898  | -1.056048 |
| O | -1.684610 | 3.281847  | -1.075177 |
| O | -3.682332 | 2.215644  | -1.109403 |
| C | -2.667126 | 4.303898  | -0.863741 |
| C | -3.981086 | 3.599886  | -1.345562 |
| C | -2.282529 | 5.545600  | -1.653982 |
| C | -2.672547 | 4.621808  | 0.632993  |
| C | -4.230782 | 3.760903  | -2.845294 |
| C | -5.231077 | 3.981250  | -0.566873 |
| H | -3.334354 | 3.502242  | -3.428576 |
| H | -4.533352 | 4.786636  | -3.103557 |
| H | -5.037886 | 3.077658  | -3.148761 |
| H | -5.138884 | 3.728515  | 0.497951  |
| H | -6.101955 | 3.441227  | -0.967989 |
| H | -5.432467 | 5.060238  | -0.653515 |
| H | -2.945381 | 3.736958  | 1.227805  |
| H | -3.368080 | 5.438150  | 0.878478  |
| H | -1.660803 | 4.930735  | 0.935423  |
| H | -2.105517 | 5.315228  | -2.712785 |
| H | -1.356439 | 5.976766  | -1.244582 |
| H | -3.069996 | 6.312444  | -1.589607 |
| C | -0.157174 | -3.291746 | -3.004646 |
| C | -0.767803 | -4.370271 | -3.640935 |
| C | -0.819627 | -2.060725 | -2.872003 |
| C | -2.063728 | -4.248362 | -4.144225 |
| C | -2.130623 | -1.957099 | -3.368249 |
| C | -2.743991 | -3.038859 | -3.994946 |
| C | -0.114229 | -0.912303 | -2.272797 |
| C | -0.336764 | 0.394037  | -2.685650 |
| H | -3.766306 | -2.936650 | -4.367715 |
| H | -2.680737 | -1.019599 | -3.250303 |
| H | -2.545355 | -5.095185 | -4.638881 |
| H | -0.228661 | -5.315660 | -3.742839 |
| H | 0.856335  | -3.396541 | -2.606645 |
| P | 3.373090  | -0.494238 | -0.542382 |
| C | 2.916935  | -0.451208 | -3.284324 |
| C | 2.759036  | 0.099579  | -4.556456 |
| C | 3.146014  | 0.363855  | -2.168590 |
| C | 2.822502  | 1.480318  | -4.729107 |
| C | 3.242850  | 1.749103  | -2.362593 |
| C | 3.070079  | 2.303806  | -3.628955 |
| C | 7.088175  | 0.632486  | 0.976180  |
| C | 5.710292  | 0.452639  | 0.836688  |
| C | 5.173745  | -0.129571 | -0.315589 |
| C | 7.954335  | 0.230208  | -0.037448 |
| C | 7.431972  | -0.357736 | -1.191778 |
| C | 6.058110  | -0.539607 | -1.327213 |
| C | 2.643335  | 2.053236  | 0.937910  |
| C | 2.541335  | 0.548620  | 0.710314  |
| C | 1.617178  | 0.090712  | 1.590643  |
| C | 1.303718  | 2.628112  | 0.386381  |
| C | 0.273256  | 2.142667  | 1.430001  |
| C | 1.126488  | 1.300921  | 2.417938  |
| C | 0.478238  | 0.998121  | 3.752293  |
| C | 2.429319  | 2.169981  | 2.473013  |
| C | 2.230166  | 3.614460  | 2.951645  |
| C | 3.512424  | 1.574796  | 3.373179  |
| C | 1.188273  | -1.302282 | 1.886746  |
| C | 2.082085  | -2.206059 | 2.418652  |
| C | -0.181042 | -1.823383 | 1.883441  |
| S | 1.274701  | -3.632038 | 2.970278  |
| C | -0.280476 | -3.060436 | 2.487432  |
| C | 3.565898  | -2.135357 | 2.596891  |
| C | -1.453052 | -3.942723 | 2.798704  |
| P | -1.571158 | -1.015892 | 0.998149  |
| C | -2.805713 | -4.524558 | -0.786603 |
| C | -2.017639 | -3.527021 | -0.220655 |
| C | -4.192326 | -4.380899 | -0.841187 |
| C | -2.608366 | -2.385681 | 0.335336  |
| C | -4.784592 | -3.231231 | -0.323115 |
| C | -3.998608 | -2.239280 | 0.264211  |
| C | -4.327706 | 1.346420  | 2.923235  |
| C | -3.482376 | 0.776132  | 1.970543  |
| C | -4.328806 | 0.873076  | 4.233789  |
| C | -2.635153 | -0.284120 | 2.314782  |
| C | -3.479738 | -0.175897 | 4.588382  |
| C | -2.639542 | -0.750025 | 3.636616  |
| H | 2.842192  | -1.534161 | -3.155897 |

|    |           |           |           |
|----|-----------|-----------|-----------|
| H  | 2.570823  | -0.554642 | -5.410876 |
| H  | 2.685823  | 1.918013  | -5.720866 |
| H  | 3.462022  | 2.408858  | -1.523055 |
| H  | 3.136484  | 3.386522  | -3.759042 |
| H  | 7.481891  | 1.094299  | 1.885006  |
| H  | 5.049240  | 0.775631  | 1.637986  |
| H  | 9.032178  | 0.373045  | 0.069145  |
| H  | 8.101458  | -0.679927 | -1.993087 |
| H  | 5.669323  | -1.002871 | -2.238654 |
| H  | 3.550877  | 2.532153  | 0.546152  |
| H  | 1.086611  | 2.237585  | -0.615630 |
| H  | 1.331201  | 3.723691  | 0.302685  |
| H  | -0.534072 | 1.556989  | 0.977024  |
| H  | -0.207898 | 2.976378  | 1.961326  |
| H  | 0.291432  | 1.931286  | 4.306442  |
| H  | 1.113972  | 0.350799  | 4.376403  |
| H  | -0.488600 | 0.496848  | 3.630325  |
| H  | 3.188629  | 4.154141  | 2.887307  |
| H  | 1.918639  | 3.632745  | 4.007921  |
| H  | 1.494033  | 4.191225  | 2.379562  |
| H  | 4.470199  | 2.101129  | 3.237107  |
| H  | 3.678317  | 0.504842  | 3.210901  |
| H  | 3.229218  | 1.700372  | 4.429823  |
| H  | 3.964575  | -1.185053 | 2.230320  |
| H  | 4.066173  | -2.936148 | 2.030070  |
| H  | 3.854021  | -2.244023 | 3.654270  |
| H  | -1.410839 | -4.263646 | 3.851195  |
| H  | -1.455640 | -4.850966 | 2.176303  |
| H  | -2.408676 | -3.431722 | 2.642104  |
| H  | -2.330026 | -5.415906 | -1.200405 |
| H  | -0.932875 | -3.649818 | -0.195306 |
| H  | -4.808250 | -5.161829 | -1.293160 |
| H  | -5.868428 | -3.101602 | -0.368694 |
| H  | -4.482830 | -1.351774 | 0.677039  |
| H  | -4.986332 | 2.169262  | 2.634680  |
| H  | -3.488651 | 1.161484  | 0.948445  |
| H  | -4.987415 | 1.322346  | 4.980860  |
| H  | -3.465579 | -0.548822 | 5.615105  |
| H  | -1.964360 | -1.550580 | 3.942242  |
| Cu | -1.306472 | 0.253092  | -0.909500 |
| H  | 0.805192  | -1.150091 | -1.732325 |
| H  | -1.025821 | 0.617647  | -3.504923 |
| H  | 0.409423  | 1.167482  | -2.480847 |

121

Figure 1\_ts(CuBadd)\_minor02\_01 / electronic energy: -4987.94770508 a.u. / lowest freq: -69.30 cm<sup>-1</sup>

|   |           |           |           |
|---|-----------|-----------|-----------|
| B | -1.458715 | 2.422573  | -0.112285 |
| O | -0.772971 | 3.615568  | -0.252665 |
| O | -2.657999 | 2.652433  | 0.557587  |
| C | -1.426240 | 4.637671  | 0.521303  |
| C | -2.881393 | 4.067897  | 0.659307  |
| C | -1.324206 | 5.960919  | -0.222165 |
| C | -0.700733 | 4.739537  | 1.862190  |
| C | -3.790406 | 4.469733  | -0.501674 |
| C | -3.567321 | 4.363251  | 1.983997  |
| H | -3.311589 | 4.281206  | -1.473903 |
| H | -4.063762 | 5.534081  | -0.453779 |
| H | -4.715348 | 3.875221  | -0.458728 |
| H | -3.007345 | 3.949298  | 2.833127  |
| H | -4.570401 | 3.911336  | 1.989732  |
| H | -3.683172 | 5.447221  | 2.135814  |
| H | -0.757213 | 3.794372  | 2.422119  |
| H | -1.115886 | 5.544417  | 2.486242  |
| H | 0.360619  | 4.960206  | 1.679964  |
| H | -1.700235 | 5.879995  | -1.250357 |
| H | -0.271791 | 6.278142  | -0.272841 |
| H | -1.890759 | 6.748392  | 0.298278  |
| C | -3.398691 | -1.660472 | -3.462047 |
| C | -4.598910 | -2.365905 | -3.497354 |
| C | -3.188267 | -0.612047 | -2.542875 |
| C | -5.628490 | -2.058702 | -2.605851 |
| C | -4.226830 | -0.340635 | -1.624230 |
| C | -5.425179 | -1.046763 | -1.664115 |
| C | -1.963490 | 0.183046  | -2.596964 |
| C | -1.931502 | 1.528079  | -2.144782 |
| H | -6.210124 | -0.809062 | -0.941055 |
| H | -4.085402 | 0.434396  | -0.865286 |
| H | -6.572614 | -2.607734 | -2.635375 |
| H | -4.733940 | -3.161056 | -4.236028 |
| H | -2.608171 | -1.903479 | -4.178579 |
| P | 1.405884  | 0.353194  | -1.472394 |
| C | 1.417140  | 1.872240  | -3.795932 |
| C | 1.962680  | 2.671518  | -4.800216 |
| C | 2.198183  | 1.454608  | -2.710187 |
| C | 3.297074  | 3.069255  | -4.728999 |
| C | 3.542651  | 1.848250  | -2.656545 |
| C | 4.086183  | 2.653873  | -3.655850 |
| C | 3.589718  | -2.922138 | -2.766414 |
| C | 3.253094  | -1.644801 | -2.326272 |
| C | 1.913357  | -1.305282 | -2.099342 |
| C | 2.592224  | -3.876669 | -2.980815 |
| C | 1.256005  | -3.542488 | -2.769860 |
| C | 0.920913  | -2.259088 | -2.335969 |
| C | 2.883661  | 1.855439  | 0.613077  |
| C | 2.382960  | 0.539904  | 0.035769  |
| C | 2.531105  | -0.398481 | 0.992272  |
| C | 1.848588  | 2.246790  | 1.702347  |
| C | 2.083613  | 1.182723  | 2.791609  |

|    |           |           |           |
|----|-----------|-----------|-----------|
| C  | 3.212304  | 0.287569  | 2.194305  |
| C  | 3.888283  | -0.590670 | 3.226429  |
| C  | 4.088583  | 1.363511  | 1.460166  |
| C  | 4.688247  | 2.429102  | 2.383687  |
| C  | 5.243327  | 0.801160  | 0.627279  |
| C  | 2.029019  | -1.795377 | 1.026632  |
| C  | 2.901511  | -2.856365 | 1.031921  |
| C  | 0.636236  | -2.214006 | 1.185593  |
| S  | 2.069302  | -4.339897 | 1.308140  |
| C  | 0.524490  | -3.571231 | 1.418448  |
| C  | 4.379435  | -2.874963 | 0.805921  |
| C  | -0.624165 | -4.458266 | 1.803526  |
| P  | -0.777952 | -1.032356 | 1.029464  |
| C  | -3.412833 | -3.784255 | -0.508929 |
| C  | -2.318491 | -2.949531 | -0.311763 |
| C  | -4.489169 | -3.750361 | 0.378109  |
| C  | -2.262265 | -2.094714 | 0.796237  |
| C  | -4.465617 | -2.865104 | 1.453258  |
| C  | -3.358595 | -2.041555 | 1.663404  |
| C  | -1.767511 | 1.260625  | 4.295404  |
| C  | -1.618071 | 0.780838  | 2.994127  |
| C  | -1.289746 | 0.520700  | 5.376185  |
| C  | -0.989372 | -0.446879 | 2.761513  |
| C  | -0.676806 | -0.712691 | 5.151900  |
| C  | -0.529814 | -1.195850 | 3.852946  |
| H  | 0.371512  | 1.564195  | -3.867269 |
| H  | 1.338691  | 2.986780  | -5.639717 |
| H  | 3.723580  | 3.701883  | -5.511041 |
| H  | 4.177168  | 1.521778  | -1.831088 |
| H  | 5.134861  | 2.954689  | -3.596147 |
| H  | 4.638208  | -3.177640 | -2.937344 |
| H  | 4.043778  | -0.911556 | -2.149075 |
| H  | 2.859839  | -4.881286 | -3.317172 |
| H  | 0.469596  | -4.281893 | -2.939631 |
| H  | -0.123472 | -1.988302 | -2.166137 |
| H  | 3.088129  | 2.652096  | -0.113449 |
| H  | 0.831303  | 2.230566  | 1.292639  |
| H  | 2.037531  | 3.264959  | 2.070839  |
| H  | 1.192094  | 0.588133  | 3.011681  |
| H  | 2.410994  | 1.626407  | 3.743830  |
| H  | 4.253273  | 0.023062  | 4.064782  |
| H  | 4.747679  | -1.137468 | 2.814401  |
| H  | 3.184247  | -1.330134 | 3.639636  |
| H  | 5.093928  | 3.259751  | 1.784210  |
| H  | 5.525494  | 2.005323  | 2.960762  |
| H  | 3.978747  | 2.857784  | 3.102328  |
| H  | 5.777712  | 1.620828  | 0.120704  |
| H  | 4.913802  | 0.091718  | -0.141942 |
| H  | 5.975799  | 0.287851  | 1.270831  |
| H  | 4.748245  | -1.865171 | 0.594151  |
| H  | 4.634150  | -3.510227 | -0.056664 |
| H  | 4.924513  | -3.266928 | 1.678774  |
| H  | -0.269196 | -5.258322 | 2.469943  |
| H  | -1.090818 | -4.936578 | 0.929560  |
| H  | -1.404888 | -3.903637 | 2.336061  |
| H  | -3.428723 | -4.460537 | -1.366206 |
| H  | -1.480975 | -2.991737 | -1.009969 |
| H  | -5.351410 | -4.402215 | 0.220121  |
| H  | -5.309802 | -2.817815 | 2.145352  |
| H  | -3.349934 | -1.370054 | 2.524082  |
| H  | -2.256937 | 2.223646  | 4.461451  |
| H  | -1.996756 | 1.371024  | 2.157419  |
| H  | -1.396737 | 0.903418  | 6.394007  |
| H  | -0.303614 | -1.301143 | 5.993328  |
| H  | -0.031576 | -2.154160 | 3.691327  |
| Cu | -0.853529 | 0.552421  | -0.712431 |
| H  | -1.224513 | -0.131439 | -3.340034 |
| H  | -2.886933 | 1.991154  | -1.878097 |
| H  | -1.244437 | 2.225260  | -2.632589 |

121

Figure 1\_ts(CuBadd)\_minor02\_02 / electronic energy: -4987.95176996 a.u. / lowest freq: -106.00 cm<sup>-1</sup>

|   |          |           |           |
|---|----------|-----------|-----------|
| B | 1.661237 | 2.191684  | 0.031274  |
| O | 1.130545 | 3.467516  | 0.138046  |
| O | 2.842974 | 2.244943  | -0.700597 |
| C | 1.860541 | 4.365230  | -0.716623 |
| C | 3.228921 | 3.617606  | -0.884503 |
| C | 1.957498 | 5.724489  | -0.041416 |
| C | 1.085407 | 4.489021  | -2.027284 |
| C | 4.236481 | 3.953892  | 0.214010  |
| C | 3.876586 | 3.771353  | -2.251567 |
| H | 3.783660 | 3.887434  | 1.214284  |
| H | 4.654248 | 4.963687  | 0.090363  |
| H | 5.064574 | 3.230882  | 0.170454  |
| H | 3.230582 | 3.386886  | -3.052126 |
| H | 4.822807 | 3.210631  | -2.280800 |
| H | 4.101347 | 4.828422  | -2.460651 |
| H | 0.994439 | 3.517812  | -2.536411 |
| H | 1.564193 | 5.202587  | -2.713553 |
| H | 0.070462 | 4.851880  | -1.811813 |
| H | 2.374052 | 5.647255  | 0.971449  |
| H | 0.956697 | 6.174873  | 0.038262  |
| H | 2.589682 | 6.406477  | -0.630361 |
| C | 3.379682 | -1.841866 | 3.420086  |
| C | 4.543417 | -2.606392 | 3.414634  |
| C | 3.174794 | -0.806295 | 2.484401  |
| C | 5.541473 | -2.373902 | 2.465944  |
| C | 4.183825 | -0.603139 | 1.515754  |

|    |           |           |           |
|----|-----------|-----------|-----------|
| C  | 5.344694  | -1.370316 | 1.513709  |
| C  | 1.985499  | 0.037105  | 2.555764  |
| C  | 1.997708  | 1.378509  | 2.075898  |
| H  | 6.105388  | -1.188270 | 0.749508  |
| H  | 4.045082  | 0.162344  | 0.746358  |
| H  | 6.455946  | -2.971901 | 2.461720  |
| H  | 4.674408  | -3.391713 | 4.164618  |
| H  | 2.612916  | -2.029649 | 4.177976  |
| P  | -1.341937 | 0.466347  | 1.507555  |
| C  | -2.414792 | 1.633618  | 3.891140  |
| C  | -2.622008 | 2.709793  | 4.755737  |
| C  | -1.756821 | 1.821737  | 2.670052  |
| C  | -2.175916 | 3.984625  | 4.411244  |
| C  | -1.286279 | 3.104006  | 2.341492  |
| C  | -1.507086 | 4.177948  | 3.201392  |
| C  | -1.687509 | -3.311187 | 3.047747  |
| C  | -1.190769 | -2.103917 | 2.555388  |
| C  | -2.056977 | -1.051006 | 2.247797  |
| C  | -3.057845 | -3.470267 | 3.244283  |
| C  | -3.930296 | -2.419348 | 2.951274  |
| C  | -3.433728 | -1.218880 | 2.450067  |
| C  | -2.846508 | 2.073162  | -0.492467 |
| C  | -2.382844 | 0.733378  | 0.051876  |
| C  | -2.610484 | -0.197931 | -0.896487 |
| C  | -1.812379 | 2.441839  | -1.588886 |
| C  | -2.092387 | 1.383430  | -2.676540 |
| C  | -3.266027 | 0.535824  | -2.083615 |
| C  | -3.990478 | -0.293071 | -3.123799 |
| C  | -4.080044 | 1.647044  | -1.331712 |
| C  | -4.636686 | 2.742899  | -2.247260 |
| C  | -5.247296 | 1.156655  | -0.473038 |
| C  | -2.239480 | -1.638506 | -0.907112 |
| C  | -3.214330 | -2.607241 | -0.852768 |
| C  | -0.899602 | -2.206749 | -1.061305 |
| S  | -2.539315 | -4.179114 | -1.050519 |
| C  | -0.928249 | -3.579676 | -1.214329 |
| C  | -4.685568 | -2.473400 | -0.621221 |
| C  | 0.117155  | -4.603665 | -1.550726 |
| P  | 0.627731  | -1.171096 | -1.016460 |
| C  | 4.072473  | -3.405895 | -1.564263 |
| C  | 3.029387  | -2.501993 | -1.772007 |
| C  | 4.112420  | -4.178605 | -0.405967 |
| C  | 2.018175  | -2.358529 | -0.816784 |
| C  | 3.118920  | -4.022302 | 0.561416  |
| C  | 2.094352  | -3.102611 | 0.367307  |
| C  | 0.278581  | -0.914367 | -5.127272 |
| C  | 0.153856  | -1.345362 | -3.807513 |
| C  | 1.053562  | 0.206117  | -5.427935 |
| C  | 0.796343  | -0.654038 | -2.772669 |
| C  | 1.712665  | 0.885730  | -4.403611 |
| C  | 1.583380  | 0.461663  | -3.081271 |
| H  | -2.766773 | 0.641541  | 4.180960  |
| H  | -3.134911 | 2.546526  | 5.706602  |
| H  | -2.339101 | 4.824853  | 5.090387  |
| H  | -0.721292 | 3.263171  | 1.417707  |
| H  | -1.137775 | 5.170002  | 2.929921  |
| H  | -0.999588 | -4.129206 | 3.273846  |
| H  | -0.118641 | -1.974416 | 2.389160  |
| H  | -3.450755 | -4.415079 | 3.627607  |
| H  | -5.004970 | -2.541250 | 3.105479  |
| H  | -4.124345 | -0.408590 | 2.204009  |
| H  | -3.022753 | 2.856071  | 0.257052  |
| H  | -0.789943 | 2.397970  | -1.194878 |
| H  | -1.979051 | 3.464842  | -1.956149 |
| H  | -1.225703 | 0.749494  | -2.889188 |
| H  | -2.393445 | 1.839707  | -3.631356 |
| H  | -4.326525 | 0.346882  | -3.954684 |
| H  | -4.875629 | -0.799735 | -2.714419 |
| H  | -3.327565 | -1.063604 | -3.547829 |
| H  | -4.972050 | 3.602865  | -1.645381 |
| H  | -5.516029 | 2.367696  | -2.794493 |
| H  | -3.924238 | 3.119697  | -2.991518 |
| H  | -5.736981 | 2.014201  | 0.014933  |
| H  | -4.934811 | 0.465668  | 0.318763  |
| H  | -6.009919 | 0.654485  | -1.089572 |
| H  | -4.950841 | -1.426930 | -0.441866 |
| H  | -4.996292 | -3.052001 | 0.262578  |
| H  | -5.271294 | -2.838004 | -1.479677 |
| H  | 0.878504  | -4.199283 | -2.228064 |
| H  | -0.351150 | -5.463307 | -2.051971 |
| H  | 0.632557  | -4.983141 | -0.656796 |
| H  | 4.853054  | -3.509714 | -2.321744 |
| H  | 3.001727  | -1.923932 | -2.697580 |
| H  | 4.922684  | -4.894506 | -0.249516 |
| H  | 3.150632  | -4.608502 | 1.481898  |
| H  | 1.327237  | -2.982774 | 1.135578  |
| H  | -0.237147 | -1.454634 | -5.924666 |
| H  | -0.465355 | -2.216519 | -3.582136 |
| H  | 1.146205  | 0.547516  | -6.461706 |
| H  | 2.329183  | 1.758833  | -4.632614 |
| H  | 2.099291  | 1.005275  | -2.286266 |
| Cu | 0.877075  | 0.406739  | 0.678335  |
| H  | 1.257180  | -0.220366 | 3.330461  |
| H  | 2.974366  | 1.808806  | 1.826517  |
| H  | 1.331959  | 2.095969  | 2.566784  |

121

Figure 1\_ts(CuBadd)\_minor02\_03 / electronic energy: -4987.95176079 a.u. / lowest freq: -108.47 cm<sup>-1</sup>

|   |           |           |           |
|---|-----------|-----------|-----------|
| B | -1.717898 | 2.139919  | -0.012296 |
| O | -1.220474 | 3.431223  | -0.084201 |
| O | -2.914856 | 2.147223  | 0.698300  |
| C | -1.990399 | 4.290657  | 0.775066  |
| C | -3.342807 | 3.505422  | 0.894565  |
| C | -2.105291 | 5.663575  | 0.131058  |
| C | -1.247577 | 4.400844  | 2.105722  |
| C | -4.329908 | 3.836518  | -0.224255 |
| C | -4.031294 | 3.619541  | 2.245230  |
| H | -3.850414 | 3.803058  | -1.213645 |
| H | -4.776957 | 4.832597  | -0.091458 |
| H | -5.139836 | 3.092107  | -0.216198 |
| H | -3.403762 | 3.226676  | 3.056003  |
| H | -4.969606 | 3.045059  | 2.235261  |
| H | -4.277688 | 4.668616  | 2.469730  |
| H | -1.141628 | 3.419646  | 2.592363  |
| H | -1.761755 | 5.083173  | 2.798125  |
| H | -0.238383 | 4.796691  | 1.923320  |
| H | -2.497702 | 5.603211  | -0.892443 |
| H | -1.113626 | 6.138092  | 0.084467  |
| H | -2.764643 | 6.316656  | 0.722918  |
| C | -3.414334 | -1.871782 | -3.389124 |
| C | -4.576846 | -2.637432 | -3.362024 |
| C | -3.191610 | -0.838310 | -2.455667 |
| C | -5.555768 | -2.407521 | -2.393048 |
| C | -4.180554 | -0.637894 | -1.465412 |
| C | -5.340469 | -1.406709 | -1.441662 |
| C | -2.004684 | 0.006674  | -2.548693 |
| C | -2.016699 | 1.348456  | -2.071763 |
| H | -6.086258 | -1.227195 | -0.662328 |
| H | -4.026186 | 0.126916  | -0.698029 |
| H | -6.469664 | -3.006061 | -2.372077 |
| H | -4.722369 | -3.421325 | -4.110822 |
| H | -2.662208 | -2.057630 | -4.162009 |
| P | 1.336803  | 0.513067  | -1.508681 |
| C | 1.209951  | 3.159542  | -2.306865 |
| C | 1.401124  | 4.250055  | -3.152844 |
| C | 1.716265  | 1.895125  | -2.651464 |
| C | 2.075425  | 4.090898  | -4.364692 |
| C | 2.379856  | 1.741150  | -3.874324 |
| C | 2.557060  | 2.833569  | -4.725154 |
| C | 4.007736  | -2.283610 | -2.977454 |
| C | 3.477408  | -1.102031 | -2.466156 |
| C | 2.096163  | -0.974307 | -2.265053 |
| C | 3.165388  | -3.355567 | -3.282262 |
| C | 1.790676  | -3.236064 | -3.087986 |
| C | 1.260040  | -2.047720 | -2.585156 |
| C | 2.790977  | 2.137050  | 0.515111  |
| C | 2.364913  | 0.791646  | -0.045885 |
| C | 2.619307  | -0.144433 | 0.890903  |
| C | 1.747546  | 2.462355  | 1.617234  |
| C | 2.061289  | 1.401160  | 2.692840  |
| C | 3.255609  | 0.592622  | 2.086656  |
| C | 4.003137  | -0.229279 | 3.116174  |
| C | 4.037365  | 1.734807  | 1.347430  |
| C | 4.564675  | 2.834839  | 2.275150  |
| C | 5.216070  | 1.286549  | 0.481608  |
| C | 2.289784  | -1.595033 | 0.882376  |
| C | 3.290500  | -2.536410 | 0.818316  |
| C | 0.965594  | -2.201592 | 1.025940  |
| S | 2.657525  | -4.128337 | 0.995482  |
| C | 1.030518  | -3.574919 | 1.162353  |
| C | 4.758445  | -2.361600 | 0.592711  |
| C | 0.011415  | -4.629502 | 1.485213  |
| P | -0.588671 | -1.207189 | 0.992983  |
| C | -3.011031 | -4.098156 | -0.618809 |
| C | -2.004880 | -3.160924 | -0.412596 |
| C | -4.002923 | -4.285140 | 0.344315  |
| C | -1.947170 | -2.427606 | 0.779031  |
| C | -3.980637 | -3.524735 | 1.511381  |
| C | -2.956965 | -2.601735 | 1.730705  |
| C | -1.674698 | 0.813642  | 4.402283  |
| C | -1.555780 | 0.396387  | 3.076830  |
| C | -1.003530 | 0.131947  | 5.417235  |
| C | -0.763620 | -0.711761 | 2.755113  |
| C | -0.226463 | -0.983670 | 5.104245  |
| C | -0.109432 | -1.405697 | 3.780982  |
| H | 0.640591  | 3.291632  | -1.381415 |
| H | 1.004020  | 5.227744  | -2.868960 |
| H | 2.215035  | 4.944042  | -5.032883 |
| H | 2.759823  | 0.763247  | -4.176618 |
| H | 3.074323  | 2.696275  | -5.677745 |
| H | 5.085690  | -2.374511 | -3.130314 |
| H | 4.144949  | -0.275218 | -2.211301 |
| H | 3.585028  | -4.285495 | -3.673443 |
| H | 1.126166  | -4.070545 | -3.323911 |
| H | 0.184223  | -1.948881 | -2.421370 |
| H | 2.944283  | 2.933668  | -0.224929 |
| H | 0.726267  | 2.392008  | 1.223862  |
| H | 1.883762  | 3.485946  | 1.995512  |
| H | 1.213715  | 0.741321  | 2.903630  |
| H | 2.355278  | 1.856473  | 3.650311  |
| H | 4.322819  | 0.409249  | 3.954641  |
| H | 4.900829  | -0.708204 | 2.700787  |
| H | 3.360894  | -1.021794 | 3.531411  |
| H | 4.885765  | 3.706516  | 1.682335  |
| H | 5.447989  | 2.474089  | 2.825778  |

|    |           |           |           |
|----|-----------|-----------|-----------|
| H  | 3.838732  | 3.190872  | 3.016426  |
| H  | 5.676384  | 2.161493  | -0.003941 |
| H  | 4.921506  | 0.590233  | -0.312284 |
| H  | 5.996857  | 0.805828  | 1.092450  |
| H  | 4.997238  | -1.306807 | 0.425212  |
| H  | 5.086411  | -2.922646 | -0.296114 |
| H  | 5.350991  | -2.720335 | 1.448992  |
| H  | 0.499756  | -5.480111 | 1.982852  |
| H  | -0.489186 | -5.015624 | 0.585695  |
| H  | -0.764253 | -4.249965 | 2.160656  |
| H  | -3.028696 | -4.676203 | -1.544833 |
| H  | -1.238173 | -3.018081 | -1.177188 |
| H  | -4.798714 | -5.014915 | 0.178137  |
| H  | -4.760634 | -3.652383 | 2.265807  |
| H  | -2.943397 | -2.031531 | 2.661509  |
| H  | -2.290181 | 1.684397  | 4.641903  |
| H  | -2.081755 | 0.940238  | 2.288812  |
| H  | -1.088099 | 0.468238  | 6.453356  |
| H  | 0.298306  | -1.525937 | 5.894330  |
| H  | 0.514556  | -2.270669 | 3.545330  |
| Cu | -0.881727 | 0.385843  | -0.679173 |
| H  | -1.284597 | -0.252628 | -3.330406 |
| H  | -2.993673 | 1.777675  | -1.822495 |
| H  | -1.351516 | 2.066285  | -2.562867 |

121

Figure 1\_ts(CuBadd)\_minor02\_04 / electronic energy: -4987.94109714 a.u. / lowest freq: -155.05 cm<sup>-1</sup>

|   |           |           |           |
|---|-----------|-----------|-----------|
| B | -2.732017 | 1.664795  | 0.017914  |
| O | -2.645153 | 2.836994  | 0.740174  |
| O | -4.052155 | 1.257021  | -0.085979 |
| C | -3.923583 | 3.104406  | 1.341992  |
| C | -4.899284 | 2.314966  | 0.400628  |
| C | -4.152414 | 4.607228  | 1.379351  |
| C | -3.876720 | 2.547686  | 2.764325  |
| C | -5.341590 | 3.127788  | -0.814848 |
| C | -6.104022 | 1.704717  | 1.096646  |
| H | -4.483476 | 3.599122  | -1.317235 |
| H | -6.057899 | 3.915465  | -0.539929 |
| H | -5.828344 | 2.455512  | -1.536858 |
| H | -5.801168 | 0.986984  | 1.870341  |
| H | -6.728376 | 1.170639  | 0.364871  |
| H | -6.721711 | 2.485814  | 1.565373  |
| H | -3.711941 | 1.460364  | 2.764156  |
| H | -4.802103 | 2.763534  | 3.318289  |
| H | -3.038607 | 3.015260  | 3.301551  |
| H | -4.027410 | 5.065563  | 0.389593  |
| H | -3.428704 | 5.076061  | 2.062728  |
| H | -5.163844 | 4.836980  | 1.747844  |
| C | -0.692658 | -0.552093 | -4.564434 |
| C | -1.238160 | -1.465661 | -5.459451 |
| C | -1.458161 | 0.003069  | -3.513273 |
| C | -2.569098 | -1.876772 | -5.338117 |
| C | -2.797629 | -0.440807 | -3.395303 |
| C | -3.335886 | -1.361074 | -4.291851 |
| C | -0.877788 | 0.988625  | -2.613493 |
| C | -1.709167 | 1.900187  | -1.854656 |
| H | -4.373521 | -1.683298 | -4.166361 |
| H | -3.423421 | -0.065991 | -2.579796 |
| H | -2.995938 | -2.596398 | -6.040794 |
| H | -0.615876 | -1.863155 | -6.266577 |
| H | 0.350026  | -0.239924 | -4.677177 |
| P | 2.620981  | 0.501609  | -1.059226 |
| C | 1.815247  | 3.084977  | -1.889448 |
| C | 1.863475  | 4.217005  | -2.701015 |
| C | 2.787356  | 2.079379  | -1.992489 |
| C | 2.881500  | 4.362934  | -3.642434 |
| C | 3.800714  | 2.233715  | -2.950871 |
| C | 3.847570  | 3.364498  | -3.765738 |
| C | 6.655982  | 0.456203  | -0.077466 |
| C | 5.355477  | 0.898597  | -0.306455 |
| C | 4.383724  | 0.020522  | -0.809337 |
| C | 7.001890  | -0.870358 | -0.349015 |
| C | 6.046187  | -1.748415 | -0.856085 |
| C | 4.743077  | -1.302507 | -1.087920 |
| C | 2.011910  | 2.392639  | 1.275165  |
| C | 2.162493  | 1.016351  | 0.639587  |
| C | 1.824931  | 0.115184  | 1.584505  |
| C | 0.481609  | 2.607096  | 1.432210  |
| C | 0.101697  | 1.575289  | 2.515906  |
| C | 1.460000  | 0.888719  | 2.860219  |
| C | 1.438409  | 0.103389  | 4.154849  |
| C | 2.441283  | 2.107926  | 2.743772  |
| C | 2.147734  | 3.254768  | 3.717637  |
| C | 3.922956  | 1.768863  | 2.897493  |
| C | 1.814963  | -1.362802 | 1.466486  |
| C | 2.903129  | -2.114829 | 1.849219  |
| C | 0.707504  | -2.183488 | 1.015701  |
| S | 2.574917  | -3.797221 | 1.676261  |
| C | 0.973307  | -3.537330 | 1.100146  |
| C | 4.239458  | -1.674270 | 2.361158  |
| C | 0.117129  | -4.739419 | 0.835391  |
| P | -0.898027 | -1.502980 | 0.474042  |
| C | -1.068251 | -3.838273 | -2.870237 |
| C | -0.688175 | -2.921777 | -1.895482 |
| C | -2.277512 | -4.526664 | -2.753070 |
| C | -1.497622 | -2.712622 | -0.770423 |
| C | -3.102874 | -4.291336 | -1.655871 |
| C | -2.714253 | -3.389273 | -0.664291 |



|    |           |           |           |
|----|-----------|-----------|-----------|
| C  | -4.131404 | -1.399063 | 2.998137  |
| C  | -3.278397 | -1.238553 | 1.907810  |
| C  | -3.684309 | -2.043628 | 4.151863  |
| C  | -1.972746 | -1.748039 | 1.947295  |
| C  | -2.381803 | -2.536573 | 4.204887  |
| C  | -1.531518 | -2.396195 | 3.107168  |
| H  | 0.998444  | 2.985680  | -1.174233 |
| H  | 1.094161  | 4.986094  | -2.598005 |
| H  | 2.918913  | 5.248282  | -4.281590 |
| H  | 4.566232  | 1.462440  | -3.067038 |
| H  | 4.646409  | 3.462703  | -4.504923 |
| H  | 7.404079  | 1.148244  | 0.316706  |
| H  | 5.092133  | 1.937663  | -0.092472 |
| H  | 8.021831  | -1.216984 | -0.165632 |
| H  | 6.311212  | -2.786520 | -1.070062 |
| H  | 3.991531  | -1.996616 | -1.474251 |
| H  | 2.542327  | 3.212571  | 0.772463  |
| H  | -0.053553 | 2.427269  | 0.492589  |
| H  | 0.248714  | 3.637014  | 1.736485  |
| H  | -0.641532 | 0.846666  | 2.166170  |
| H  | -0.322457 | 2.050987  | 3.412210  |
| H  | 1.193151  | 0.762501  | 5.002408  |
| H  | 2.405422  | -0.376038 | 4.367364  |
| H  | 0.672582  | -0.687114 | 4.120295  |
| H  | 2.710544  | 4.153861  | 3.418871  |
| H  | 2.480563  | 2.985718  | 4.732787  |
| H  | 1.089665  | 3.535878  | 3.784542  |
| H  | 4.531183  | 2.677802  | 2.764198  |
| H  | 4.271040  | 1.028863  | 2.170668  |
| H  | 4.131871  | 1.381861  | 3.907826  |
| H  | 4.701335  | -0.949732 | 1.677602  |
| H  | 4.928374  | -2.524870 | 2.459258  |
| H  | 4.154340  | -1.197438 | 3.348888  |
| H  | 0.542806  | -5.630016 | 1.319323  |
| H  | 0.027808  | -4.950161 | -0.240773 |
| H  | -0.897111 | -4.594834 | 1.231580  |
| H  | -0.423579 | -4.004861 | -3.735509 |
| H  | 0.252277  | -2.373697 | -2.001962 |
| H  | -2.579652 | -5.238717 | -3.524415 |
| H  | -4.055386 | -4.817903 | -1.561088 |
| H  | -3.359218 | -3.236712 | 0.203203  |
| H  | -5.148897 | -1.004000 | 2.948799  |
| H  | -3.633289 | -0.699538 | 1.025849  |
| H  | -4.350495 | -2.157110 | 5.010261  |
| H  | -2.019248 | -3.036223 | 5.106142  |
| H  | -0.516220 | -2.793363 | 3.164377  |
| Cu | -1.199765 | 0.448965  | -0.599508 |
| H  | 0.147494  | 1.295502  | -2.831426 |
| H  | -2.744746 | 2.038810  | -2.196050 |
| H  | -1.244133 | 2.854113  | -1.580075 |

121

Figure 1\_ts(CuBadd)\_minor02\_05 / electronic energy: -4987.94907131 a.u. / lowest freq: -186.32 cm<sup>-1</sup>

|   |           |           |           |
|---|-----------|-----------|-----------|
| B | -1.623807 | 2.237244  | -0.105564 |
| O | -1.166091 | 3.540078  | -0.227424 |
| O | -2.791934 | 2.231033  | 0.645943  |
| C | -1.960968 | 4.417328  | 0.589964  |
| C | -3.271055 | 3.576496  | 0.804210  |
| C | -2.159745 | 5.730501  | -0.152036 |
| C | -1.200406 | 4.669896  | 1.889749  |
| C | -4.324400 | 3.818707  | -0.275937 |
| C | -3.903578 | 3.714718  | 2.180812  |
| H | -3.899394 | 3.748516  | -1.287858 |
| H | -4.791459 | 4.808733  | -0.170105 |
| H | -5.113289 | 3.056752  | -0.188534 |
| H | -3.224553 | 3.377593  | 2.974682  |
| H | -4.817772 | 3.104351  | 2.232352  |
| H | -4.184614 | 4.760343  | 2.378577  |
| H | -1.054449 | 3.741060  | 2.458458  |
| H | -1.730207 | 5.391576  | 2.528298  |
| H | -0.209690 | 5.084465  | 1.653529  |
| H | -2.575504 | 5.574293  | -1.156078 |
| H | -1.192614 | 6.243543  | -0.263284 |
| H | -2.833649 | 6.396783  | 0.407600  |
| C | -3.625362 | -1.706538 | -3.101571 |
| C | -4.846595 | -2.351452 | -2.934420 |
| C | -3.255413 | -0.606540 | -2.298518 |
| C | -5.746430 | -1.935325 | -1.948882 |
| C | -4.170562 | -0.212771 | -1.293280 |
| C | -5.389965 | -0.865076 | -1.127290 |
| C | -2.006122 | 0.109789  | -2.524815 |
| C | -1.861383 | 1.467753  | -2.102785 |
| H | -6.072262 | -0.529847 | -0.340604 |
| H | -3.916946 | 0.617231  | -0.629156 |
| H | -6.705157 | -2.443231 | -1.819907 |
| H | -5.100695 | -3.195090 | -3.582545 |
| H | -2.938490 | -2.046528 | -3.882242 |
| P | 1.543541  | 0.572831  | -1.352201 |
| C | 1.480304  | 3.229289  | -2.162875 |
| C | 1.865897  | 4.349096  | -2.898784 |
| C | 2.119872  | 1.996062  | -2.362403 |
| C | 2.879070  | 4.248683  | -3.852897 |
| C | 3.133052  | 1.901845  | -3.323856 |
| C | 3.508556  | 3.022636  | -4.065249 |
| C | 2.173329  | -2.721958 | -3.693474 |
| C | 1.609738  | -1.619611 | -3.050352 |
| C | 2.358298  | -0.869886 | -2.135745 |
| C | 3.491650  | -3.086590 | -3.424204 |

|    |           |           |           |
|----|-----------|-----------|-----------|
| C  | 4.246762  | -2.341478 | -2.516871 |
| C  | 3.683890  | -1.239453 | -1.877164 |
| C  | 2.667008  | 2.143494  | 0.878681  |
| C  | 2.388356  | 0.793672  | 0.235942  |
| C  | 2.549199  | -0.146253 | 1.188175  |
| C  | 1.455882  | 2.402443  | 1.810372  |
| C  | 1.622122  | 1.309202  | 2.885915  |
| C  | 2.951974  | 0.589228  | 2.480113  |
| C  | 3.568494  | -0.209578 | 3.609136  |
| C  | 3.782445  | 1.780236  | 1.893460  |
| C  | 4.099799  | 2.882733  | 2.909446  |
| C  | 5.105292  | 1.398114  | 1.225972  |
| C  | 2.248749  | -1.596444 | 1.171176  |
| C  | 3.253789  | -2.523865 | 1.321771  |
| C  | 0.924087  | -2.203194 | 1.178989  |
| S  | 2.605255  | -4.102812 | 1.558360  |
| C  | 0.972386  | -3.559366 | 1.447753  |
| C  | 4.736549  | -2.336329 | 1.272006  |
| C  | -0.099855 | -4.579306 | 1.694727  |
| P  | -0.645879 | -1.323016 | 0.771259  |
| C  | -3.475731 | -4.170660 | -0.300913 |
| C  | -2.850512 | -3.108971 | 0.356825  |
| C  | -2.854120 | -4.795625 | -1.378699 |
| C  | -1.592235 | -2.670825 | -0.057072 |
| C  | -1.613427 | -4.332862 | -1.822050 |
| C  | -0.992871 | -3.270924 | -1.172158 |
| C  | -1.607775 | -1.391564 | 4.800993  |
| C  | -0.951995 | -1.618294 | 3.591217  |
| C  | -2.789149 | -0.650966 | 4.830101  |
| C  | -1.468615 | -1.099781 | 2.397411  |
| C  | -3.306419 | -0.127252 | 3.645149  |
| C  | -2.644793 | -0.339764 | 2.436892  |
| H  | 0.676107  | 3.321773  | -1.426087 |
| H  | 1.362535  | 5.304219  | -2.729996 |
| H  | 3.174432  | 5.125122  | -4.434887 |
| H  | 3.636578  | 0.949273  | -3.501781 |
| H  | 4.299148  | 2.934949  | -4.814384 |
| H  | 1.574645  | -3.302200 | -4.399428 |
| H  | 0.570211  | -1.346738 | -3.247167 |
| H  | 3.933079  | -3.954322 | -3.920093 |
| H  | 5.282113  | -2.619909 | -2.306333 |
| H  | 4.279726  | -0.663261 | -1.167359 |
| H  | 2.895788  | 2.963849  | 0.185755  |
| H  | 0.512798  | 2.325121  | 1.259398  |
| H  | 1.506228  | 3.412312  | 2.239372  |
| H  | 0.785940  | 0.595903  | 2.903882  |
| H  | 1.702567  | 1.730722  | 3.899433  |
| H  | 3.721052  | 0.436996  | 4.487321  |
| H  | 4.543585  | -0.637495 | 3.338131  |
| H  | 2.911828  | -1.037478 | 3.919349  |
| H  | 4.433331  | 3.793846  | 2.387095  |
| H  | 4.923620  | 2.565928  | 3.568704  |
| H  | 3.257801  | 3.162141  | 3.555367  |
| H  | 5.597717  | 2.300032  | 0.829579  |
| H  | 4.978034  | 0.702740  | 0.387468  |
| H  | 5.797616  | 0.941811  | 1.951699  |
| H  | 4.984124  | -1.274745 | 1.162664  |
| H  | 5.168943  | -2.869649 | 0.410430  |
| H  | 5.232423  | -2.716131 | 2.178577  |
| H  | 0.273515  | -5.363220 | 2.369866  |
| H  | -0.430974 | -5.067428 | 0.765621  |
| H  | -0.979309 | -4.126077 | 2.167671  |
| H  | -4.456524 | -4.510407 | 0.039767  |
| H  | -3.340744 | -2.649775 | 1.217771  |
| H  | -3.342355 | -5.631666 | -1.884984 |
| H  | -1.123286 | -4.803805 | -2.677682 |
| H  | -0.013501 | -2.928472 | -1.513093 |
| H  | -1.190433 | -1.797771 | 5.725355  |
| H  | -0.024935 | -2.195500 | 3.582845  |
| H  | -3.302566 | -0.475628 | 5.778515  |
| H  | -4.225316 | 0.463591  | 3.659964  |
| H  | -3.035062 | 0.112753  | 1.523923  |
| Cu | -0.748389 | 0.456831  | -0.730442 |
| H  | -1.371520 | -0.248860 | -3.339671 |
| H  | -2.789641 | 2.016378  | -1.898149 |
| H  | -1.133467 | 2.084596  | -2.640713 |

121

Figure 1\_ts(CuBadd)\_minor02\_06 / electronic energy: -4987.93299261 a.u. / lowest freq: -157.28 cm-1

|   |           |          |          |
|---|-----------|----------|----------|
| B | -1.511900 | 2.150747 | 0.936081 |
| O | -0.697609 | 2.989332 | 1.666130 |
| O | -2.835345 | 2.302644 | 1.327902 |
| C | -1.456483 | 3.526870 | 2.762066 |
| C | -2.923193 | 3.433762 | 2.215818 |
| C | -0.972272 | 4.937135 | 3.057386 |
| C | -1.209422 | 2.621898 | 3.969292 |
| C | -3.317800 | 4.642177 | 1.369322 |
| C | -3.981570 | 3.157816 | 3.270816 |
| H | -2.553319 | 4.866135 | 0.610300 |
| H | -3.466721 | 5.540381 | 1.986136 |
| H | -4.260862 | 4.424184 | 0.846324 |
| H | -3.801841 | 2.204597 | 3.785826 |
| H | -4.974181 | 3.104602 | 2.799494 |
| H | -4.002508 | 3.962243 | 4.021558 |
| H | -1.563553 | 1.596978 | 3.782270 |
| H | -1.703552 | 3.005059 | 4.874052 |
| H | -0.127808 | 2.573594 | 4.163270 |
| H | -0.985725 | 5.568315 | 2.159102 |

|   |           |           |           |
|---|-----------|-----------|-----------|
| H | 0.061672  | 4.903392  | 3.432235  |
| H | -1.597512 | 5.410543  | 3.829615  |
| C | -2.535915 | 0.947501  | -4.305042 |
| C | -3.749619 | 0.758110  | -4.957826 |
| C | -2.476573 | 1.291706  | -2.936491 |
| C | -4.957337 | 0.888747  | -4.267204 |
| C | -3.709249 | 1.412282  | -2.253137 |
| C | -4.921714 | 1.210362  | -2.908682 |
| C | -1.194630 | 1.527021  | -2.281530 |
| C | -1.085565 | 2.445205  | -1.168753 |
| H | -5.855623 | 1.303700  | -2.347200 |
| H | -3.713022 | 1.652387  | -1.185239 |
| H | -5.911066 | 0.737184  | -4.778192 |
| H | -3.754339 | 0.505001  | -6.022031 |
| H | -1.599951 | 0.841168  | -4.861928 |
| P | 3.085821  | 0.086432  | -1.379646 |
| C | 2.063574  | 2.201058  | -2.856302 |
| C | 1.739253  | 3.525698  | -3.156980 |
| C | 2.584653  | 1.853291  | -1.604603 |
| C | 1.925589  | 4.520774  | -2.201017 |
| C | 2.797401  | 2.871523  | -0.662365 |
| C | 2.458185  | 4.190444  | -0.952622 |
| C | 7.157320  | -0.244867 | -0.608846 |
| C | 5.770737  | -0.382741 | -0.527953 |
| C | 4.922358  | 0.340108  | -1.374704 |
| C | 7.723064  | 0.617057  | -1.546181 |
| C | 6.889347  | 1.338657  | -2.401990 |
| C | 5.505153  | 1.200866  | -2.318714 |
| C | 3.137678  | 0.400158  | 1.631442  |
| C | 2.720081  | -0.330275 | 0.360593  |
| C | 1.931767  | -1.359603 | 0.749984  |
| C | 1.847288  | 1.118125  | 2.120550  |
| C | 0.964553  | -0.055503 | 2.597887  |
| C | 1.834140  | -1.309866 | 2.291067  |
| C | 1.408728  | -2.587963 | 2.981957  |
| C | 3.257592  | -0.761733 | 2.657034  |
| C | 3.418642  | -0.285043 | 4.106173  |
| C | 4.379129  | -1.770762 | 2.415304  |
| C | 1.318157  | -2.462919 | -0.036640 |
| C | 2.096722  | -3.474459 | -0.552235 |
| C | -0.107511 | -2.753847 | -0.161761 |
| S | 1.122075  | -4.785686 | -1.111963 |
| C | -0.355826 | -4.005680 | -0.688710 |
| C | 3.584181  | -3.621761 | -0.637250 |
| C | -1.627214 | -4.758050 | -0.947123 |
| P | -1.409614 | -1.505384 | 0.139897  |
| C | -3.494910 | -2.288736 | -3.295977 |
| C | -2.489021 | -1.995810 | -2.382110 |
| C | -4.805362 | -2.484825 | -2.857403 |
| C | -2.774209 | -1.932441 | -1.012934 |
| C | -5.101098 | -2.388516 | -1.499803 |
| C | -4.089829 | -2.115043 | -0.577996 |
| C | -3.372480 | -1.109704 | 3.715039  |
| C | -2.777193 | -0.858536 | 2.479262  |
| C | -3.312101 | -2.385039 | 4.275716  |
| C | -2.122672 | -1.885471 | 1.788578  |
| C | -2.662188 | -3.412624 | 3.591744  |
| C | -2.073531 | -3.165887 | 2.352203  |
| H | 1.912211  | 1.424580  | -3.611045 |
| H | 1.326142  | 3.773540  | -4.137331 |
| H | 1.662408  | 5.556718  | -2.427350 |
| H | 3.249876  | 2.644237  | 0.302709  |
| H | 2.617084  | 4.967305  | -0.201023 |
| H | 7.795511  | -0.817063 | 0.069107  |
| H | 5.348564  | -1.057836 | 0.214555  |
| H | 8.807942  | 0.728633  | -1.611165 |
| H | 7.318790  | 2.019171  | -3.141429 |
| H | 4.873830  | 1.780938  | -2.996646 |
| H | 4.021050  | 1.046661  | 1.534412  |
| H | 1.364659  | 1.684662  | 1.316897  |
| H | 2.064081  | 1.834816  | 2.925590  |
| H | 0.002455  | -0.083376 | 2.074203  |
| H | 0.741448  | -0.006349 | 3.673973  |
| H | 1.478393  | -2.475726 | 4.075336  |
| H | 2.039596  | -3.439927 | 2.683695  |
| H | 0.368483  | -2.845190 | 2.746481  |
| H | 4.409972  | 0.180070  | 4.230313  |
| H | 3.373319  | -1.137511 | 4.802209  |
| H | 2.672977  | 0.448310  | 4.434854  |
| H | 5.364550  | -1.287594 | 2.506255  |
| H | 4.320285  | -2.255127 | 1.436503  |
| H | 4.338362  | -2.566093 | 3.175703  |
| H | 4.075347  | -2.645299 | -0.710986 |
| H | 3.868803  | -4.195476 | -1.531348 |
| H | 3.992082  | -4.151596 | 0.238243  |
| H | -1.473401 | -5.832287 | -0.766936 |
| H | -1.968304 | -4.637767 | -1.986924 |
| H | -2.438573 | -4.420486 | -0.292630 |
| H | -3.258471 | -2.347785 | -4.360319 |
| H | -1.468757 | -1.823332 | -2.735470 |
| H | -5.596664 | -2.702124 | -3.578485 |
| H | -6.126216 | -2.529568 | -1.149299 |
| H | -4.334452 | -2.057560 | 0.484462  |
| H | -3.883472 | -0.300569 | 4.242492  |
| H | -2.829564 | 0.144650  | 2.048310  |
| H | -3.772655 | -2.578887 | 5.247309  |
| H | -2.608472 | -4.413212 | 4.026609  |

|    |           |           |           |
|----|-----------|-----------|-----------|
| H  | -1.559633 | -3.977582 | 1.832573  |
| Cu | -1.030791 | 0.645561  | -0.358308 |
| H  | -0.308347 | 1.377953  | -2.899229 |
| H  | -1.914798 | 3.150600  | -1.014615 |
| H  | -0.109627 | 2.923544  | -1.030352 |

121

Figure 1\_L-Cu-alkyl\_minor02\_01 / electronic energy: -4988.00284447 a.u. / lowest freq: 18.49 cm<sup>-1</sup>

|   |           |           |           |
|---|-----------|-----------|-----------|
| B | -3.578268 | 1.551810  | -1.214751 |
| O | -3.156644 | 2.597694  | -0.431966 |
| O | -4.781004 | 1.050351  | -0.774457 |
| C | -4.043185 | 2.722389  | 0.694406  |
| C | -5.327774 | 1.966158  | 0.189676  |
| C | -4.255365 | 4.198256  | 0.994274  |
| C | -3.377943 | 2.041484  | 1.886392  |
| C | -6.301432 | 2.872437  | -0.563558 |
| C | -6.068516 | 1.187659  | 1.263448  |
| H | -5.790460 | 3.448508  | -1.349548 |
| H | -6.806715 | 3.576495  | 0.113021  |
| H | -7.068691 | 2.249721  | -1.046580 |
| H | -5.425420 | 0.431173  | 1.728623  |
| H | -6.935896 | 0.675254  | 0.821076  |
| H | -6.437725 | 1.866012  | 2.047427  |
| H | -3.160005 | 0.985101  | 1.676616  |
| H | -4.005240 | 2.097610  | 2.787525  |
| H | -2.429967 | 2.547810  | 2.104261  |
| H | -4.581119 | 4.753525  | 0.104999  |
| H | -3.313651 | 4.645188  | 1.346377  |
| H | -5.008790 | 4.328799  | 1.785899  |
| C | -1.670843 | -2.493996 | -3.142153 |
| C | -2.166175 | -3.789365 | -3.202870 |
| C | -2.400768 | -1.431897 | -2.549476 |
| C | -3.421205 | -4.100122 | -2.666012 |
| C | -3.668800 | -1.769237 | -2.025695 |
| C | -4.160130 | -3.076125 | -2.077484 |
| C | -1.829329 | -0.068294 | -2.507587 |
| C | -2.837930 | 1.102003  | -2.527638 |
| H | -5.146795 | -3.289505 | -1.654704 |
| H | -4.285137 | -0.993440 | -1.567487 |
| H | -3.811595 | -5.119786 | -2.710254 |
| H | -1.566282 | -4.571625 | -3.676389 |
| H | -0.685931 | -2.279071 | -3.570597 |
| P | 1.787282  | 0.765872  | -1.344448 |
| C | 3.284802  | 2.663744  | -2.854451 |
| C | 3.396203  | 3.720870  | -3.755213 |
| C | 2.030268  | 2.107201  | -2.573864 |
| C | 2.256893  | 4.231188  | -4.382038 |
| C | 0.894440  | 2.617718  | -3.210905 |
| C | 1.006296  | 3.678950  | -4.110010 |
| C | 4.376685  | -2.015704 | -2.820922 |
| C | 3.272740  | -1.197912 | -2.591370 |
| C | 3.289162  | -0.256179 | -1.552072 |
| C | 5.505044  | -1.909336 | -2.005972 |
| C | 5.530030  | -0.972304 | -0.973675 |
| C | 4.429624  | -0.144222 | -0.750558 |
| C | 1.398727  | 3.053179  | 0.398790  |
| C | 1.935799  | 1.640420  | 0.232804  |
| C | 2.103805  | 1.127493  | 1.469618  |
| C | -0.059453 | 2.850491  | 0.891606  |
| C | 0.150715  | 2.270963  | 2.308391  |
| C | 1.705071  | 2.228351  | 2.467705  |
| C | 2.159397  | 2.096651  | 3.906196  |
| C | 2.131667  | 3.512592  | 1.682995  |
| C | 1.600770  | 4.820229  | 2.277501  |
| C | 3.640853  | 3.682837  | 1.490055  |
| C | 2.384641  | -0.258356 | 1.908926  |
| C | 3.544825  | -0.582603 | 2.572674  |
| C | 1.454500  | -1.375161 | 1.837362  |
| S | 3.493584  | -2.210845 | 3.144667  |
| C | 1.917663  | -2.491960 | 2.502796  |
| C | 4.767607  | 0.247004  | 2.805768  |
| C | 1.288761  | -3.833413 | 2.722915  |
| P | -0.079596 | -1.373122 | 0.830810  |
| C | -0.845346 | -5.271978 | -0.424505 |
| C | -0.991697 | -4.037510 | 0.208465  |
| C | 0.269657  | -5.531703 | -1.218414 |
| C | -0.016415 | -3.048548 | 0.060019  |
| C | 1.241188  | -4.543172 | -1.383140 |
| C | 1.096105  | -3.311552 | -0.751277 |
| C | -2.401884 | -1.326560 | 4.255186  |
| C | -1.293156 | -1.304572 | 3.407343  |
| C | -3.680299 | -1.525919 | 3.735418  |
| C | -1.460135 | -1.452831 | 2.026572  |
| C | -3.852003 | -1.675916 | 2.358507  |
| C | -2.753209 | -1.608155 | 1.505996  |
| H | 4.181255  | 2.271398  | -2.366891 |
| H | 4.377171  | 4.152343  | -3.967931 |
| H | 2.347042  | 5.059038  | -5.089456 |
| H | -0.084113 | 2.181895  | -2.993078 |
| H | 0.112388  | 4.072610  | -4.599241 |
| H | 4.351908  | -2.746627 | -3.632388 |
| H | 2.383929  | -1.297825 | -3.221868 |
| H | 6.367298  | -2.557714 | -2.178207 |
| H | 6.414172  | -0.880679 | -0.338298 |
| H | 4.458484  | 0.595480  | 0.050759  |
| H | 1.499196  | 3.708676  | -0.476351 |
| H | -0.623824 | 2.177518  | 0.229193  |
| H | -0.607524 | 3.803003  | 0.908407  |

|    |           |           |           |
|----|-----------|-----------|-----------|
| H  | -0.284541 | 1.268790  | 2.434782  |
| H  | -0.294117 | 2.908702  | 3.087412  |
| H  | 1.732306  | 2.910215  | 4.513269  |
| H  | 3.252831  | 2.145200  | 4.006603  |
| H  | 1.822636  | 1.144977  | 4.346290  |
| H  | 1.752210  | 5.646603  | 1.564707  |
| H  | 2.154045  | 5.075625  | 3.195227  |
| H  | 0.533692  | 4.798444  | 2.532900  |
| H  | 3.844244  | 4.585673  | 0.892725  |
| H  | 4.105638  | 2.834906  | 0.970406  |
| H  | 4.148667  | 3.812983  | 2.459228  |
| H  | 4.645309  | 1.241673  | 2.359932  |
| H  | 5.654904  | -0.218432 | 2.347884  |
| H  | 4.979924  | 0.376922  | 3.878276  |
| H  | 0.200814  | -3.745006 | 2.839416  |
| H  | 1.687781  | -4.305523 | 3.632412  |
| H  | 1.483385  | -4.513135 | 1.878331  |
| H  | -1.615668 | -6.035665 | -0.294945 |
| H  | -1.868755 | -3.865826 | 0.834105  |
| H  | 0.380753  | -6.500040 | -1.711891 |
| H  | 2.121118  | -4.730780 | -2.003346 |
| H  | 1.871766  | -2.552308 | -0.874449 |
| H  | -2.260666 | -1.198706 | 5.330876  |
| H  | -0.292975 | -1.172502 | 3.827223  |
| H  | -4.544092 | -1.559031 | 4.403568  |
| H  | -4.848539 | -1.829855 | 1.939091  |
| H  | -2.902014 | -1.682749 | 0.425056  |
| Cu | -0.354592 | -0.123317 | -1.105101 |
| H  | -1.190832 | 0.034866  | -3.404309 |
| H  | -3.617822 | 0.929544  | -3.301109 |
| H  | -2.292550 | 2.004588  | -2.857285 |

121

Figure 1 L-Cu-alkyl\_minor02\_02 / electronic energy: -4988.00460427 a.u. / lowest freq: 19.49 cm<sup>-1</sup>

|   |           |           |           |
|---|-----------|-----------|-----------|
| B | 3.635258  | -1.383737 | -1.047351 |
| O | 4.512845  | -2.443076 | -1.073882 |
| O | 3.390843  | -0.967894 | 0.240420  |
| C | 4.721887  | -2.884610 | 0.277871  |
| C | 4.365879  | -1.595138 | 1.096302  |
| C | 6.155270  | -3.363199 | 0.437785  |
| C | 3.747839  | -4.034432 | 0.531110  |
| C | 5.543719  | -0.627884 | 1.216755  |
| C | 3.764619  | -1.852569 | 2.466476  |
| H | 6.021275  | -0.446442 | 0.242397  |
| H | 6.305861  | -1.004325 | 1.914101  |
| H | 5.177726  | 0.335771  | 1.599557  |
| H | 2.843137  | -2.441001 | 2.404981  |
| H | 3.524685  | -0.898301 | 2.957012  |
| H | 4.482943  | -2.392437 | 3.102095  |
| H | 2.704764  | -3.699055 | 0.437305  |
| H | 3.885771  | -4.475390 | 1.529131  |
| H | 3.919559  | -4.821126 | -0.218404 |
| H | 6.875820  | -2.612359 | 0.088192  |
| H | 6.311208  | -4.281231 | -0.147988 |
| H | 6.370101  | -3.593245 | 1.492518  |
| C | 2.331692  | 2.902608  | -2.841163 |
| C | 2.924647  | 4.147072  | -2.661078 |
| C | 2.756696  | 1.753323  | -2.131116 |
| C | 3.977491  | 4.313898  | -1.755946 |
| C | 3.834255  | 1.947635  | -1.236748 |
| C | 4.422132  | 3.197742  | -1.047174 |
| C | 2.108141  | 0.441595  | -2.349543 |
| C | 3.059445  | -0.768396 | -2.368832 |
| H | 5.246174  | 3.296138  | -0.333650 |
| H | 4.204879  | 1.098728  | -0.661620 |
| H | 4.442680  | 5.292143  | -1.611710 |
| H | 2.558816  | 5.002620  | -3.235887 |
| H | 1.511282  | 2.802428  | -3.559368 |
| P | -1.335052 | -1.206640 | -1.338737 |
| C | 0.064161  | -3.314371 | -2.463533 |
| C | 0.233253  | -4.551236 | -3.085120 |
| C | -1.217574 | -2.791336 | -2.256496 |
| C | -0.881307 | -5.269082 | -3.518485 |
| C | -2.331547 | -3.514940 | -2.697957 |
| C | -2.162186 | -4.747250 | -3.327818 |
| C | -3.935291 | 1.039490  | -3.540363 |
| C | -2.793867 | 0.424616  | -3.028072 |
| C | -2.888067 | -0.453143 | -1.939586 |
| C | -5.180563 | 0.789188  | -2.963562 |
| C | -5.282713 | -0.088526 | -1.883872 |
| C | -4.143178 | -0.710468 | -1.376769 |
| C | -0.956461 | -3.004232 | 0.916232  |
| C | -1.638733 | -1.767667 | 0.355153  |
| C | -2.120272 | -1.063546 | 1.400740  |
| C | 0.339551  | -2.472552 | 1.579454  |
| C | -0.209875 | -1.658772 | 2.771203  |
| C | -1.761252 | -1.853349 | 2.671804  |
| C | -2.489028 | -1.511465 | 3.955281  |
| C | -1.851521 | -3.323667 | 2.140331  |
| C | -1.272838 | -4.371193 | 3.096955  |
| C | -3.251749 | -3.799706 | 1.745053  |
| C | -2.734202 | 0.284246  | 1.435816  |
| C | -4.051919 | 0.466116  | 1.784130  |
| C | -2.038892 | 1.540891  | 1.201898  |
| S | -4.439450 | 2.145163  | 1.864936  |
| C | -2.840809 | 2.639468  | 1.438210  |
| C | -5.122993 | -0.551886 | 2.015761  |
| C | -2.554149 | 4.111244  | 1.418483  |

|    |           |           |           |
|----|-----------|-----------|-----------|
| P  | -0.312092 | 1.597805  | 0.579849  |
| C  | 0.543878  | 5.455141  | -0.677768 |
| C  | 0.558812  | 4.271714  | 0.060380  |
| C  | -0.263280 | 5.571050  | -1.808157 |
| C  | -0.244830 | 3.195637  | -0.322884 |
| C  | -1.042475 | 4.486254  | -2.214390 |
| C  | -1.026253 | 3.303196  | -1.480738 |
| C  | 1.043228  | 2.599708  | 4.358142  |
| C  | 0.195460  | 2.363662  | 3.276850  |
| C  | 2.414664  | 2.373888  | 4.233727  |
| C  | 0.713798  | 1.889430  | 2.065681  |
| C  | 2.933031  | 1.890384  | 3.032395  |
| C  | 2.085997  | 1.631210  | 1.955342  |
| H  | 0.935882  | -2.745855 | -2.128837 |
| H  | 1.238896  | -4.951023 | -3.235063 |
| H  | -0.752371 | -6.235811 | -4.010969 |
| H  | -3.338954 | -3.117465 | -2.550965 |
| H  | -3.036997 | -5.304793 | -3.670833 |
| H  | -3.849650 | 1.724572  | -4.386939 |
| H  | -1.817593 | 0.630612  | -3.476729 |
| H  | -6.074465 | 1.277758  | -3.358246 |
| H  | -6.256690 | -0.290125 | -1.431597 |
| H  | -4.227867 | -1.397223 | -0.532880 |
| H  | -0.803064 | -3.827230 | 0.205734  |
| H  | 0.944239  | -1.868047 | 0.886987  |
| H  | 0.967463  | -3.310869 | 1.912707  |
| H  | 0.052365  | -0.593719 | 2.723598  |
| H  | 0.164779  | -2.034545 | 3.735280  |
| H  | -2.077797 | -2.094935 | 4.793686  |
| H  | -3.565985 | -1.723177 | 3.896951  |
| H  | -2.368166 | -0.445451 | 4.204409  |
| H  | -1.121227 | -5.325492 | 2.567561  |
| H  | -1.979601 | -4.564414 | 3.919423  |
| H  | -0.314544 | -4.087990 | 3.550210  |
| H  | -3.200659 | -4.833682 | 1.368382  |
| H  | -3.706413 | -3.188684 | 0.954784  |
| H  | -3.929789 | -3.802087 | 2.613688  |
| H  | -4.713735 | -1.564342 | 1.924682  |
| H  | -5.929612 | -0.450321 | 1.271849  |
| H  | -5.580170 | -0.452052 | 3.012457  |
| H  | -3.299098 | 4.656582  | 2.015741  |
| H  | -2.578545 | 4.521778  | 0.397604  |
| H  | -1.564365 | 4.326263  | 1.839933  |
| H  | 1.173062  | 6.291854  | -0.365503 |
| H  | 1.190282  | 4.199856  | 0.948479  |
| H  | -0.275641 | 6.501628  | -2.380513 |
| H  | -1.667965 | 4.560622  | -3.107261 |
| H  | -1.649172 | 2.462267  | -1.796967 |
| H  | 0.630582  | 2.968263  | 5.300241  |
| H  | -0.877055 | 2.544670  | 3.380618  |
| H  | 3.080486  | 2.569203  | 5.077751  |
| H  | 4.005011  | 1.704186  | 2.935170  |
| H  | 2.487462  | 1.210464  | 1.029137  |
| Cu | 0.489316  | 0.209984  | -1.141418 |
| H  | 1.613250  | 0.490959  | -3.337785 |
| H  | 3.953909  | -0.573173 | -3.004796 |
| H  | 2.564919  | -1.609864 | -2.888839 |

121

Figure 1 L-Cu-alkyl\_minor02\_03 / electronic energy: -4987.99535033 a.u. / lowest freq: 13.37 cm<sup>-1</sup>

|   |           |           |           |
|---|-----------|-----------|-----------|
| B | -3.622429 | -2.108342 | 0.741907  |
| O | -3.241674 | -2.816677 | -0.371116 |
| O | -4.838119 | -1.495903 | 0.553915  |
| C | -4.136149 | -2.489631 | -1.449226 |
| C | -5.405029 | -1.962850 | -0.681273 |
| C | -4.374058 | -3.731811 | -2.293148 |
| C | -3.457718 | -1.411663 | -2.289043 |
| C | -6.397555 | -3.069521 | -0.329658 |
| C | -6.124316 | -0.809359 | -1.360836 |
| H | -5.898002 | -3.917111 | 0.162982  |
| H | -6.919704 | -3.443595 | -1.222068 |
| H | -7.149007 | -2.670156 | 0.367373  |
| H | -5.465356 | 0.060266  | -1.478568 |
| H | -6.990289 | -0.501468 | -0.755983 |
| H | -6.492581 | -1.108963 | -2.353614 |
| H | -3.204823 | -0.530074 | -1.682359 |
| H | -4.088985 | -1.088438 | -3.129060 |
| H | -2.525479 | -1.815086 | -2.703194 |
| H | -4.721613 | -4.579268 | -1.688261 |
| H | -3.437046 | -4.030614 | -2.786298 |
| H | -5.119365 | -3.530411 | -3.077489 |
| C | -1.711441 | 1.283126  | 3.618890  |
| C | -2.228702 | 2.478272  | 4.101326  |
| C | -2.472049 | 0.405079  | 2.808303  |
| C | -3.540972 | 2.860228  | 3.802229  |
| C | -3.799039 | 0.803953  | 2.533545  |
| C | -4.315683 | 2.008398  | 3.016702  |
| C | -1.853916 | -0.837402 | 2.276322  |
| C | -2.786868 | -2.053301 | 2.070456  |
| H | -5.348557 | 2.278360  | 2.775824  |
| H | -4.434613 | 0.165615  | 1.917463  |
| H | -3.948894 | 3.800978  | 4.180032  |
| H | -1.599759 | 3.123402  | 4.721081  |
| H | -0.677785 | 1.012105  | 3.858522  |
| P | 2.238695  | -0.783753 | 1.246153  |
| C | 0.896627  | -3.035672 | 2.251120  |
| C | 0.679836  | -4.087820 | 3.138307  |
| C | 2.068920  | -2.266273 | 2.318093  |

|    |           |           |           |
|----|-----------|-----------|-----------|
| C  | 1.623767  | -4.382816 | 4.122413  |
| C  | 3.003629  | -2.563715 | 3.319927  |
| C  | 2.783064  | -3.613790 | 4.211765  |
| C  | 6.342122  | -1.249587 | 0.803410  |
| C  | 4.983261  | -1.533710 | 0.915345  |
| C  | 4.060213  | -0.508630 | 1.173628  |
| C  | 6.796225  | 0.065196  | 0.937823  |
| C  | 5.887750  | 1.090579  | 1.191385  |
| C  | 4.526982  | 0.802457  | 1.314809  |
| C  | 1.465637  | -2.757821 | -0.945701 |
| C  | 1.934996  | -1.397654 | -0.450370 |
| C  | 2.001294  | -0.591203 | -1.528879 |
| C  | -0.029020 | -2.562177 | -1.324852 |
| C  | 0.058957  | -1.625043 | -2.550878 |
| C  | 1.591142  | -1.420261 | -2.753836 |
| C  | 1.952884  | -0.879736 | -4.121236 |
| C  | 2.144353  | -2.826696 | -2.343434 |
| C  | 1.657976  | -3.983699 | -3.222194 |
| C  | 3.669563  | -2.919958 | -2.282004 |
| C  | 2.321650  | 0.852020  | -1.594177 |
| C  | 3.551849  | 1.305959  | -2.009780 |
| C  | 1.396662  | 1.935620  | -1.321497 |
| S  | 3.565826  | 3.027998  | -2.115946 |
| C  | 1.932488  | 3.179736  | -1.590349 |
| C  | 4.794145  | 0.528339  | -2.315037 |
| C  | 1.332293  | 4.546566  | -1.470807 |
| P  | -0.225679 | 1.698119  | -0.523864 |
| C  | 0.834338  | 3.995510  | 2.681078  |
| C  | 0.763453  | 3.014320  | 1.696741  |
| C  | -0.117873 | 5.015510  | 2.722035  |
| C  | -0.250220 | 3.049086  | 0.728618  |
| C  | -1.142566 | 5.038970  | 1.778545  |
| C  | -1.209923 | 4.061664  | 0.784440  |
| C  | -3.846049 | 2.367015  | -2.299276 |
| C  | -2.838986 | 2.093055  | -1.377288 |
| C  | -3.523100 | 2.644612  | -3.628723 |
| C  | -1.491588 | 2.133937  | -1.768534 |
| C  | -2.187699 | 2.661370  | -4.028562 |
| C  | -1.174197 | 2.416059  | -3.101202 |
| H  | 0.132159  | -2.802059 | 1.507935  |
| H  | -0.239631 | -4.673323 | 3.063156  |
| H  | 1.452221  | -5.203983 | 4.822290  |
| H  | 3.917475  | -1.972806 | 3.414017  |
| H  | 3.526385  | -3.829233 | 4.983160  |
| H  | 7.051702  | -2.055889 | 0.603107  |
| H  | 4.634464  | -2.563375 | 0.801994  |
| H  | 7.861706  | 0.287402  | 0.841957  |
| H  | 6.235934  | 2.120926  | 1.295039  |
| H  | 3.816943  | 1.611406  | 1.507159  |
| H  | 1.663430  | -3.605778 | -0.277570 |
| H  | -0.614734 | -2.127770 | -0.501190 |
| H  | -0.506728 | -3.521062 | -1.568364 |
| H  | -0.445699 | -0.660108 | -2.395572 |
| H  | -0.387341 | -2.075465 | -3.450319 |
| H  | 1.581150  | -1.553022 | -4.909374 |
| H  | 3.038987  | -0.774505 | -4.255453 |
| H  | 1.497098  | 0.108732  | -4.290298 |
| H  | 1.899658  | -4.946334 | -2.743607 |
| H  | 2.173037  | -3.965258 | -4.195616 |
| H  | 0.578960  | -3.977832 | -3.421794 |
| H  | 3.973746  | -3.912706 | -1.912872 |
| H  | 4.116856  | -2.169084 | -1.621365 |
| H  | 4.110068  | -2.796441 | -3.284425 |
| H  | 5.008841  | -0.183408 | -1.506016 |
| H  | 5.665486  | 1.190354  | -2.416470 |
| H  | 4.701272  | -0.044634 | -3.249559 |
| H  | 1.815045  | 5.248105  | -2.166550 |
| H  | 1.449531  | 4.949580  | -0.452166 |
| H  | 0.259158  | 4.529872  | -1.702284 |
| H  | 1.633163  | 3.958747  | 3.425377  |
| H  | 1.505866  | 2.211194  | 1.678876  |
| H  | -0.066935 | 5.784438  | 3.496333  |
| H  | -1.898798 | 5.826648  | 1.808889  |
| H  | -2.008951 | 4.111333  | 0.042552  |
| H  | -4.890501 | 2.349331  | -1.980150 |
| H  | -3.102834 | 1.842775  | -0.344831 |
| H  | -4.314701 | 2.844301  | -4.354595 |
| H  | -1.929570 | 2.871990  | -5.068955 |
| H  | -0.128980 | 2.443305  | -3.418765 |
| Cu | -0.841470 | -0.046613 | 0.746386  |
| H  | -1.054759 | -1.132316 | 2.978596  |
| H  | -3.474928 | -2.167924 | 2.934217  |
| H  | -2.156913 | -2.960015 | 2.068100  |

121

Figure 1\_L-Cu-alkyl\_minor02\_04 / electronic energy: -4987.99700051 a.u. / lowest freq: -32.38 cm-1

|   |           |          |           |
|---|-----------|----------|-----------|
| B | -3.016917 | 2.583386 | -0.985420 |
| O | -2.514319 | 2.473527 | 0.286403  |
| O | -4.245688 | 3.199846 | -0.991871 |
| C | -3.559355 | 2.804412 | 1.216383  |
| C | -4.521973 | 3.681069 | 0.334042  |
| C | -2.977597 | 3.533967 | 2.416993  |
| C | -4.176754 | 1.483445 | 1.666974  |
| C | -4.164340 | 5.166185 | 0.353226  |
| C | -5.999683 | 3.491237 | 0.636931  |
| H | -3.093715 | 5.323414 | 0.154230  |
| H | -4.412066 | 5.633398 | 1.317011  |
| H | -4.733380 | 5.681889 | -0.434328 |

|   |           |           |           |
|---|-----------|-----------|-----------|
| H | -6.316557 | 2.453269  | 0.469764  |
| H | -6.603827 | 4.139446  | -0.015251 |
| H | -6.219107 | 3.759790  | 1.681455  |
| H | -4.614688 | 0.933505  | 0.821511  |
| H | -4.952856 | 1.630456  | 2.432368  |
| H | -3.384061 | 0.854801  | 2.097886  |
| H | -2.337950 | 4.374345  | 2.116265  |
| H | -2.375493 | 2.842774  | 3.023781  |
| H | -3.786256 | 3.920888  | 3.055663  |
| C | -2.688417 | -1.727810 | -2.761398 |
| C | -3.654680 | -2.723237 | -2.729471 |
| C | -2.963642 | -0.391793 | -2.366815 |
| C | -4.960387 | -2.441918 | -2.304352 |
| C | -4.297657 | -0.126740 | -1.982768 |
| C | -5.267120 | -1.132442 | -1.940541 |
| C | -1.876483 | 0.611955  | -2.333193 |
| C | -2.292733 | 2.088901  | -2.288340 |
| H | -6.283261 | -0.878387 | -1.623481 |
| H | -4.592426 | 0.887111  | -1.705073 |
| H | -5.719662 | -3.226653 | -2.270882 |
| H | -3.385573 | -3.739925 | -3.030575 |
| H | -1.668650 | -1.982192 | -3.070354 |
| P | 3.044801  | -0.144247 | -1.075530 |
| C | 1.733389  | -0.814474 | -3.413396 |
| C | 1.050177  | -0.617734 | -4.614024 |
| C | 2.068271  | 0.266802  | -2.585620 |
| C | 0.687392  | 0.669215  | -5.004600 |
| C | 1.687932  | 1.556557  | -2.989691 |
| C | 1.006699  | 1.755292  | -4.188210 |
| C | 6.919292  | 1.076162  | -0.561762 |
| C | 5.654391  | 0.512934  | -0.412087 |
| C | 4.672860  | 0.668613  | -1.404271 |
| C | 7.233998  | 1.789598  | -1.720040 |
| C | 6.276412  | 1.928582  | -2.722895 |
| C | 5.004860  | 1.371818  | -2.567875 |
| C | 2.177867  | 2.449428  | 0.237796  |
| C | 2.429369  | 0.946321  | 0.248845  |
| C | 2.110354  | 0.503122  | 1.483299  |
| C | 0.634239  | 2.596984  | 0.250183  |
| C | 0.265095  | 2.068485  | 1.654018  |
| C | 1.642674  | 1.716920  | 2.297013  |
| C | 1.595442  | 1.568678  | 3.803400  |
| C | 2.548125  | 2.846298  | 1.692364  |
| C | 2.127238  | 4.265077  | 2.093687  |
| C | 4.044002  | 2.733043  | 1.983265  |
| C | 2.110500  | -0.881433 | 2.017023  |
| C | 3.102854  | -1.333563 | 2.855900  |
| C | 1.079392  | -1.881629 | 1.800439  |
| S | 2.782543  | -2.948540 | 3.381475  |
| C | 1.313970  | -3.053961 | 2.490004  |
| C | 4.358119  | -0.655000 | 3.304080  |
| C | 0.536025  | -4.332790 | 2.533318  |
| P | -0.329388 | -1.697556 | 0.658661  |
| C | 1.095432  | -4.635267 | -1.791698 |
| C | 0.944318  | -3.501085 | -0.998332 |
| C | 0.048835  | -5.551250 | -1.909797 |
| C | -0.251898 | -3.267007 | -0.305817 |
| C | -1.142807 | -5.324158 | -1.224165 |
| C | -1.294766 | -4.188902 | -0.426440 |
| C | -4.254817 | -1.918561 | 1.815171  |
| C | -3.081968 | -1.878030 | 1.065860  |
| C | -4.201536 | -1.831322 | 3.206467  |
| C | -1.834373 | -1.795400 | 1.702746  |
| C | -2.967919 | -1.705717 | 3.843709  |
| C | -1.788327 | -1.694833 | 3.098112  |
| H | 2.014127  | -1.828727 | -3.119443 |
| H | 0.797156  | -1.475676 | -5.241177 |
| H | 0.148907  | 0.827838  | -5.941644 |
| H | 1.938527  | 2.423460  | -2.378108 |
| H | 0.719882  | 2.766787  | -4.484881 |
| H | 7.665944  | 0.952296  | 0.226484  |
| H | 5.422354  | -0.056313 | 0.493537  |
| H | 8.226025  | 2.230866  | -1.842221 |
| H | 6.515956  | 2.476651  | -3.637510 |
| H | 4.270050  | 1.491963  | -3.366484 |
| H | 2.702183  | 3.011477  | -0.547229 |
| H | 0.162376  | 2.019987  | -0.557785 |
| H | 0.327047  | 3.642946  | 0.110844  |
| H | -0.399448 | 1.193688  | 1.618115  |
| H | -0.252548 | 2.828030  | 2.253373  |
| H | 1.242771  | 2.502417  | 4.268743  |
| H | 2.579775  | 1.329594  | 4.232389  |
| H | 0.897895  | 0.769707  | 4.100241  |
| H | 2.619679  | 5.003626  | 1.440887  |
| H | 2.448901  | 4.477617  | 3.125612  |
| H | 1.046809  | 4.448972  | 2.044611  |
| H | 4.579933  | 3.570446  | 1.509009  |
| H | 4.488442  | 1.810197  | 1.594722  |
| H | 4.242093  | 2.790625  | 3.065630  |
| H | 5.248553  | -1.123773 | 2.855281  |
| H | 4.478350  | -0.700088 | 4.397366  |
| H | 4.350059  | 0.398513  | 3.008119  |
| H | 0.722835  | -4.873846 | 3.472054  |
| H | 0.819053  | -4.995573 | 1.699880  |
| H | -0.543822 | -4.150015 | 2.461235  |
| H | 2.037504  | -4.803294 | -2.319065 |
| H | 1.772068  | -2.791045 | -0.909496 |



|    |           |           |           |
|----|-----------|-----------|-----------|
| H  | 0.164414  | -6.441741 | -2.531920 |
| H  | -1.965922 | -6.038138 | -1.303824 |
| H  | -2.235216 | -4.041920 | 0.106297  |
| H  | -5.215849 | -1.997331 | 1.302106  |
| H  | -3.144407 | -1.904614 | -0.025004 |
| H  | -5.123255 | -1.849249 | 3.792753  |
| H  | -2.917577 | -1.621863 | 4.931848  |
| H  | -0.826879 | -1.612530 | 3.610317  |
| Cu | -0.750176 | -0.094879 | -0.841388 |
| H  | -1.221276 | 0.436634  | -3.202032 |
| H  | -2.920363 | 2.370006  | -3.159896 |
| H  | -1.377509 | 2.704436  | -2.375082 |

121

Figure 1 L-Cu-alkyl\_major\_01 / electronic energy: -4988.00213073 a.u. / lowest freq: 5.51 cm<sup>-1</sup>

|   |           |           |           |
|---|-----------|-----------|-----------|
| B | -4.786516 | -0.332462 | -0.765204 |
| O | -5.624676 | -0.957398 | 0.124943  |
| O | -5.444896 | 0.616008  | -1.507697 |
| C | -6.968114 | -0.509271 | -0.121271 |
| C | -6.733526 | 0.834091  | -0.909911 |
| C | -7.684787 | -0.345352 | 1.210402  |
| C | -7.654850 | -1.586856 | -0.958589 |
| C | -6.600853 | 2.051778  | 0.004573  |
| C | -7.753172 | 1.111321  | -2.003631 |
| H | -5.863992 | 1.877991  | 0.803020  |
| H | -7.562331 | 2.323466  | 0.463842  |
| H | -6.248167 | 2.907323  | -0.589999 |
| H | -7.756794 | 0.322566  | -2.767021 |
| H | -7.515408 | 2.062826  | -2.502067 |
| H | -8.765138 | 1.195871  | -1.579249 |
| H | -7.156238 | -1.721297 | -1.930043 |
| H | -8.713287 | -1.350001 | -1.139832 |
| H | -7.605215 | -2.544128 | -0.418826 |
| H | -8.681784 | 0.098280  | 1.066853  |
| H | -7.113027 | 0.290650  | 1.898900  |
| H | -7.815961 | -1.328382 | 1.687164  |
| C | -2.173292 | 2.802800  | 0.502298  |
| C | -2.312654 | 3.588612  | 1.637505  |
| C | -2.598586 | 1.449419  | 0.459344  |
| C | -2.892831 | 3.069458  | 2.802657  |
| C | -3.209240 | 0.961017  | 1.638275  |
| C | -3.341923 | 1.750513  | 2.783060  |
| C | -2.358472 | 0.619422  | -0.737264 |
| C | -3.249349 | -0.632368 | -0.888856 |
| H | -3.814173 | 1.321879  | 3.672306  |
| H | -3.604449 | -0.056389 | 1.660656  |
| H | -2.997915 | 3.684842  | 3.699268  |
| H | -1.961957 | 4.624845  | 1.617074  |
| H | -1.703831 | 3.231380  | -0.388019 |
| P | 1.550067  | 1.384865  | -1.068561 |
| C | 0.424418  | 3.676308  | -2.173401 |
| C | 0.375568  | 5.022485  | -2.540767 |
| C | 1.539889  | 3.166974  | -1.501990 |
| C | 1.440582  | 5.866719  | -2.232363 |
| C | 2.612102  | 4.019353  | -1.204816 |
| C | 2.559936  | 5.363663  | -1.564299 |
| C | 5.090415  | 0.281056  | -2.911443 |
| C | 4.186417  | 0.767785  | -1.969412 |
| C | 2.811730  | 0.736101  | -2.228936 |
| C | 4.631238  | -0.231628 | -4.125778 |
| C | 3.264177  | -0.249208 | -4.399600 |
| C | 2.358474  | 0.231642  | -3.454146 |
| C | 1.843978  | 2.318993  | 1.668210  |
| C | 2.273029  | 1.338899  | 0.587573  |
| C | 2.906855  | 0.317358  | 1.203277  |
| C | 0.708600  | 1.584809  | 2.437392  |
| C | 1.471402  | 0.452868  | 3.155363  |
| C | 2.953099  | 0.657444  | 2.704207  |
| C | 3.949896  | -0.081436 | 3.573089  |
| C | 3.040242  | 2.221327  | 2.650755  |
| C | 2.806669  | 2.914092  | 3.996499  |
| C | 4.348894  | 2.774781  | 2.079497  |
| C | 3.318467  | -0.993077 | 0.644562  |
| C | 4.636280  | -1.366764 | 0.541641  |
| C | 2.407406  | -2.034022 | 0.187691  |
| S | 4.775106  | -2.969207 | -0.087133 |
| C | 3.063931  | -3.177088 | -0.215202 |
| C | 5.871751  | -0.578613 | 0.840751  |
| C | 2.548816  | -4.496002 | -0.707525 |
| P | 0.597848  | -1.763932 | 0.151421  |
| C | -0.094181 | -3.391103 | -3.538038 |
| C | 0.440241  | -2.672419 | -2.472281 |
| C | -1.130247 | -4.301237 | -3.319397 |
| C | -0.043840 | -2.862024 | -1.170760 |
| C | -1.623659 | -4.486263 | -2.028794 |
| C | -1.085609 | -3.770357 | -0.958236 |
| C | -1.725734 | -2.486500 | 3.425854  |
| C | -1.200543 | -1.985332 | 2.236423  |
| C | -1.059926 | -3.507623 | 4.103668  |
| C | -0.014669 | -2.507675 | 1.707464  |
| C | 0.131149  | -4.023320 | 3.589643  |
| C | 0.654129  | -3.525977 | 2.396709  |
| H | -0.414248 | 3.013688  | -2.404892 |
| H | -0.501959 | 5.412242  | -3.061642 |
| H | 1.399830  | 6.922540  | -2.510646 |
| H | 3.489224  | 3.631440  | -0.679901 |
| H | 3.395459  | 6.024355  | -1.321136 |
| H | 6.161603  | 0.303461  | -2.697006 |

|    |           |           |           |
|----|-----------|-----------|-----------|
| H  | 4.552170  | 1.167082  | -1.021391 |
| H  | 5.342495  | -0.614885 | -4.861255 |
| H  | 2.897780  | -0.643878 | -5.350187 |
| H  | 1.286213  | 0.212849  | -3.669855 |
| H  | 1.577998  | 3.327051  | 1.323011  |
| H  | -0.061696 | 1.212854  | 1.744881  |
| H  | 0.205826  | 2.261615  | 3.142481  |
| H  | 1.117063  | -0.549818 | 2.887518  |
| H  | 1.391390  | 0.532445  | 4.249860  |
| H  | 3.785267  | 0.164747  | 4.633667  |
| H  | 4.991043  | 0.173519  | 3.329853  |
| H  | 3.834732  | -1.171735 | 3.467204  |
| H  | 2.693221  | 3.999378  | 3.845051  |
| H  | 3.672962  | 2.764734  | 4.660266  |
| H  | 1.916546  | 2.563426  | 4.533225  |
| H  | 4.297891  | 3.873381  | 2.015296  |
| H  | 4.573802  | 2.394153  | 1.074891  |
| H  | 5.198034  | 2.526563  | 2.736471  |
| H  | 5.612622  | 0.452499  | 1.109994  |
| H  | 6.539504  | -0.539848 | -0.034281 |
| H  | 6.444518  | -1.016453 | 1.673265  |
| H  | 2.390118  | -4.487079 | -1.797217 |
| H  | 1.590697  | -4.750339 | -0.237349 |
| H  | 3.262778  | -5.300339 | -0.478669 |
| H  | 0.301880  | -3.238749 | -4.544991 |
| H  | 1.255011  | -1.966475 | -2.650321 |
| H  | -1.553737 | -4.862682 | -4.155358 |
| H  | -2.435008 | -5.195494 | -1.848713 |
| H  | -1.484666 | -3.927470 | 0.046520  |
| H  | -2.649413 | -2.066089 | 3.830435  |
| H  | -1.700846 | -1.163168 | 1.720486  |
| H  | -1.464939 | -3.898174 | 5.040329  |
| H  | 0.659385  | -4.817090 | 4.123220  |
| H  | 1.594780  | -3.925759 | 2.011007  |
| Cu | -0.374823 | 0.213803  | -0.620787 |
| H  | -2.981048 | -1.421788 | -0.164886 |
| H  | -3.056104 | -1.085134 | -1.878456 |
| H  | -2.468249 | 1.255722  | -1.632745 |

121

Figure 1 L-Cu-alkyl\_major\_02 / electronic energy: -4988.00326436 a.u. / lowest freq: 12.36 cm-1

|   |           |           |           |
|---|-----------|-----------|-----------|
| B | -4.711635 | 0.088273  | 1.441576  |
| O | -5.563565 | 1.140317  | 1.216158  |
| O | -5.361493 | -1.120036 | 1.373267  |
| C | -6.902401 | 0.624904  | 1.108625  |
| C | -6.647991 | -0.892202 | 0.775538  |
| C | -7.645044 | 1.394219  | 0.027143  |
| C | -7.576160 | 0.836754  | 2.463272  |
| C | -6.497458 | -1.156544 | -0.723285 |
| C | -7.659346 | -1.854247 | 1.377977  |
| H | -5.780759 | -0.460882 | -1.184874 |
| H | -7.459889 | -1.072786 | -1.248724 |
| H | -6.110029 | -2.175709 | -0.868528 |
| H | -7.678510 | -1.791837 | 2.474084  |
| H | -7.400100 | -2.887511 | 1.102688  |
| H | -8.670293 | -1.646029 | 0.996065  |
| H | -7.062381 | 0.278431  | 3.260150  |
| H | -8.631922 | 0.529342  | 2.445220  |
| H | -7.534627 | 1.905982  | 2.718895  |
| H | -8.636588 | 0.951819  | -0.153268 |
| H | -7.086335 | 1.404359  | -0.917869 |
| H | -7.792271 | 2.437570  | 0.344024  |
| C | -2.646938 | -1.228770 | -1.857871 |
| C | -2.943009 | -0.957855 | -3.188440 |
| C | -2.785778 | -0.251927 | -0.840163 |
| C | -3.405090 | 0.304670  | -3.577368 |
| C | -3.271216 | 1.011280  | -1.258099 |
| C | -3.568399 | 1.281145  | -2.593069 |
| C | -2.392376 | -0.546516 | 0.553439  |
| C | -3.160581 | 0.220889  | 1.654310  |
| H | -3.935094 | 2.275124  | -2.866419 |
| H | -3.422020 | 1.799105  | -0.517800 |
| H | -3.636794 | 0.518239  | -4.623563 |
| H | -2.814468 | -1.746862 | -3.935635 |
| H | -2.283488 | -2.223726 | -1.582515 |
| P | 0.738742  | 1.669217  | -0.461058 |
| C | 0.745679  | 4.461663  | -1.031233 |
| C | 0.207647  | 5.744350  | -0.946483 |
| C | 0.085887  | 3.381721  | -0.431618 |
| C | -0.992350 | 5.958489  | -0.264241 |
| C | -1.115450 | 3.603168  | 0.248733  |
| C | -1.653293 | 4.887545  | 0.335521  |
| C | 0.952938  | 0.841954  | -4.436459 |
| C | 0.526302  | 1.017126  | -3.121699 |
| C | 1.416567  | 1.486220  | -2.145440 |
| C | 2.276833  | 1.116284  | -4.782269 |
| C | 3.166494  | 1.586539  | -3.815600 |
| C | 2.736450  | 1.781090  | -2.503234 |
| C | 1.909223  | 2.438975  | 2.052484  |
| C | 2.104185  | 1.726587  | 0.721833  |
| C | 3.165479  | 0.904068  | 0.859726  |
| C | 1.372325  | 1.336000  | 3.008354  |
| C | 2.599642  | 0.411414  | 3.162589  |
| C | 3.699795  | 1.102060  | 2.289729  |
| C | 5.102793  | 0.625147  | 2.601486  |
| C | 3.373834  | 2.614428  | 2.524050  |
| C | 3.522737  | 3.072094  | 3.978165  |
| C | 4.172827  | 3.593596  | 1.659400  |

|    |           |           |           |
|----|-----------|-----------|-----------|
| C  | 3.666383  | -0.171280 | -0.028032 |
| C  | 4.895420  | -0.098171 | -0.637757 |
| C  | 2.999293  | -1.441088 | -0.269256 |
| S  | 5.256838  | -1.567067 | -1.471851 |
| C  | 3.767903  | -2.313292 | -1.011648 |
| C  | 5.854981  | 1.047735  | -0.695489 |
| C  | 3.520427  | -3.726927 | -1.443225 |
| P  | 1.280287  | -1.748626 | 0.275578  |
| C  | 0.065186  | -3.142710 | -3.376644 |
| C  | 0.674833  | -2.414895 | -2.359098 |
| C  | -0.654583 | -4.300453 | -3.075727 |
| C  | 0.587231  | -2.841864 | -1.027262 |
| C  | -0.755464 | -4.723633 | -1.750994 |
| C  | -0.138493 | -3.999219 | -0.729506 |
| C  | 0.338954  | -3.588609 | 3.797158  |
| C  | 0.301155  | -2.840529 | 2.621874  |
| C  | 1.496736  | -4.285516 | 4.143867  |
| C  | 1.414761  | -2.797441 | 1.771404  |
| C  | 2.614325  | -4.234089 | 3.310239  |
| C  | 2.575015  | -3.494496 | 2.128702  |
| H  | 1.684536  | 4.302852  | -1.568448 |
| H  | 0.725405  | 6.583218  | -1.417681 |
| H  | -1.413985 | 6.964637  | -0.202738 |
| H  | -1.629565 | 2.757550  | 0.712523  |
| H  | -2.594313 | 5.048009  | 0.866702  |
| H  | 0.248935  | 0.476380  | -5.187612 |
| H  | -0.506629 | 0.776360  | -2.850981 |
| H  | 2.616632  | 0.964345  | -5.809581 |
| H  | 4.202526  | 1.806147  | -4.084254 |
| H  | 3.433500  | 2.158017  | -1.752690 |
| H  | 1.300778  | 3.353008  | 2.018889  |
| H  | 0.498543  | 0.823954  | 2.572635  |
| H  | 1.053512  | 1.766771  | 3.968375  |
| H  | 2.416461  | -0.613798 | 2.815421  |
| H  | 2.930829  | 0.334434  | 4.209010  |
| H  | 5.321043  | 0.764408  | 3.671866  |
| H  | 5.865852  | 1.173600  | 2.030988  |
| H  | 5.219538  | -0.446874 | 2.378081  |
| H  | 3.040429  | 4.052896  | 4.117169  |
| H  | 4.588124  | 3.195257  | 4.229104  |
| H  | 3.091090  | 2.383296  | 4.715465  |
| H  | 3.872528  | 4.628440  | 1.888166  |
| H  | 4.022459  | 3.440398  | 0.583148  |
| H  | 5.251310  | 3.513622  | 1.870655  |
| H  | 5.448008  | 1.911316  | -0.155553 |
| H  | 6.039158  | 1.358734  | -1.736102 |
| H  | 6.829631  | 0.793819  | -0.250526 |
| H  | 3.043061  | -3.771330 | -2.434622 |
| H  | 2.862160  | -4.248959 | -0.737543 |
| H  | 4.466675  | -4.284573 | -1.500700 |
| H  | 0.146497  | -2.796485 | -4.409756 |
| H  | 1.231627  | -1.507558 | -2.606423 |
| H  | -1.139468 | -4.868936 | -3.872723 |
| H  | -1.318635 | -5.627262 | -1.505871 |
| H  | -0.227574 | -4.345412 | 0.302845  |
| H  | -0.535679 | -3.615344 | 4.451192  |
| H  | -0.596533 | -2.272709 | 2.360525  |
| H  | 1.531487  | -4.862133 | 5.071286  |
| H  | 3.526536  | -4.770342 | 3.582104  |
| H  | 3.461679  | -3.447967 | 1.492428  |
| Cu | -0.421707 | -0.151943 | 0.294664  |
| H  | -2.881579 | 1.287707  | 1.705306  |
| H  | -2.879501 | -0.196747 | 2.637167  |
| H  | -2.511123 | -1.629468 | 0.727648  |

121

Figure 1\_L-Cu-alkyl\_major\_03 / electronic energy: -4988.00032240 a.u. / lowest freq: 13.63 cm<sup>-1</sup>

|   |           |           |           |
|---|-----------|-----------|-----------|
| B | -4.701898 | -0.559022 | -0.655350 |
| O | -5.470086 | -0.963108 | 0.407775  |
| O | -5.430223 | 0.170544  | -1.563085 |
| C | -6.834979 | -0.587515 | 0.158563  |
| C | -6.681865 | 0.520669  | -0.951885 |
| C | -7.453366 | -0.097960 | 1.459408  |
| C | -7.565103 | -1.836928 | -0.330868 |
| C | -6.520730 | 1.927710  | -0.375072 |
| C | -7.774161 | 0.514036  | -2.009929 |
| H | -5.739475 | 1.959186  | 0.398005  |
| H | -7.461061 | 2.300069  | 0.057364  |
| H | -6.219168 | 2.611431  | -1.182176 |
| H | -7.810236 | -0.438932 | -2.553985 |
| H | -7.587555 | 1.314063  | -2.741754 |
| H | -8.759188 | 0.694713  | -1.553534 |
| H | -7.130505 | -2.217121 | -1.267411 |
| H | -8.635375 | -1.644972 | -0.495155 |
| H | -7.471299 | -2.626624 | 0.429381  |
| H | -8.471918 | 0.283285  | 1.290906  |
| H | -6.851603 | 0.698272  | 1.916687  |
| H | -7.515573 | -0.929340 | 2.177541  |
| C | -2.869752 | 2.910838  | -0.187138 |
| C | -3.240690 | 3.885760  | 0.733258  |
| C | -2.800274 | 1.538235  | 0.152243  |
| C | -3.581177 | 3.537832  | 2.044136  |
| C | -3.181051 | 1.213142  | 1.475073  |
| C | -3.555634 | 2.187810  | 2.398298  |
| C | -2.365769 | 0.519929  | -0.830255 |
| C | -3.157313 | -0.815433 | -0.780583 |
| H | -3.838747 | 1.884482  | 3.410736  |
| H | -3.206626 | 0.165624  | 1.781323  |

|    |           |           |           |
|----|-----------|-----------|-----------|
| H  | -3.876370 | 4.301321  | 2.767617  |
| H  | -3.281070 | 4.933217  | 0.419463  |
| H  | -2.639242 | 3.206081  | -1.215584 |
| P  | 1.615186  | 1.414408  | -1.033781 |
| C  | 2.750148  | 3.924086  | -1.804022 |
| C  | 2.685669  | 5.305002  | -1.984503 |
| C  | 1.621958  | 3.219492  | -1.367055 |
| C  | 1.497821  | 5.993026  | -1.727847 |
| C  | 0.433996  | 3.913988  | -1.118509 |
| C  | 0.371337  | 5.296200  | -1.292532 |
| C  | 3.187718  | -0.187757 | -4.442801 |
| C  | 2.325750  | 0.319529  | -3.471548 |
| C  | 2.823259  | 0.750625  | -2.234511 |
| C  | 4.555739  | -0.271757 | -4.184408 |
| C  | 5.060161  | 0.167456  | -2.959973 |
| C  | 4.199676  | 0.680146  | -1.990744 |
| C  | 2.008027  | 2.317943  | 1.692966  |
| C  | 2.373551  | 1.317735  | 0.608003  |
| C  | 2.977950  | 0.271797  | 1.211580  |
| C  | 0.843710  | 1.636208  | 2.466427  |
| C  | 1.561734  | 0.466714  | 3.173919  |
| C  | 3.050051  | 0.605351  | 2.713008  |
| C  | 4.017446  | -0.180285 | 3.573947  |
| C  | 3.205919  | 2.162699  | 2.663226  |
| C  | 3.019764  | 2.859628  | 4.014062  |
| C  | 4.526001  | 2.667785  | 2.073949  |
| C  | 3.352281  | -1.040846 | 0.633188  |
| C  | 4.660435  | -1.444926 | 0.515846  |
| C  | 2.414717  | -2.041123 | 0.144114  |
| S  | 4.756446  | -3.026055 | -0.170496 |
| C  | 3.040652  | -3.183745 | -0.305737 |
| C  | 5.916648  | -0.697631 | 0.833569  |
| C  | 2.491682  | -4.468213 | -0.850255 |
| P  | 0.612107  | -1.727037 | 0.163443  |
| C  | -0.340292 | -3.237237 | -3.513131 |
| C  | 0.247597  | -2.530925 | -2.467253 |
| C  | -1.295301 | -4.219871 | -3.244399 |
| C  | -0.097817 | -2.807875 | -1.137460 |
| C  | -1.652192 | -4.491292 | -1.924355 |
| C  | -1.058130 | -3.789436 | -0.874689 |
| C  | -1.605532 | -2.462272 | 3.510489  |
| C  | -1.110854 | -1.948802 | 2.313536  |
| C  | -0.935162 | -3.506858 | 4.146772  |
| C  | 0.045911  | -2.481042 | 1.733127  |
| C  | 0.228668  | -4.032728 | 3.583159  |
| C  | 0.719313  | -3.523091 | 2.381392  |
| H  | 3.685825  | 3.397172  | -2.006711 |
| H  | 3.569401  | 5.848073  | -2.327886 |
| H  | 1.450970  | 7.075053  | -1.872385 |
| H  | -0.446132 | 3.363724  | -0.777822 |
| H  | -0.562980 | 5.825707  | -1.091317 |
| H  | 2.786917  | -0.524732 | -5.401561 |
| H  | 1.252897  | 0.380740  | -3.676258 |
| H  | 5.232542  | -0.676837 | -4.940389 |
| H  | 6.132164  | 0.109680  | -2.757242 |
| H  | 4.600512  | 1.025763  | -1.036234 |
| H  | 1.794441  | 3.338996  | 1.349891  |
| H  | 0.055584  | 1.301402  | 1.773103  |
| H  | 0.375309  | 2.331302  | 3.177916  |
| H  | 1.161277  | -0.517338 | 2.903649  |
| H  | 1.492372  | 0.544320  | 4.269207  |
| H  | 3.861872  | 0.058850  | 4.637438  |
| H  | 5.067055  | 0.040508  | 3.333824  |
| H  | 3.863337  | -1.264292 | 3.454622  |
| H  | 2.943858  | 3.948795  | 3.867276  |
| H  | 3.892435  | 2.676826  | 4.661079  |
| H  | 2.127952  | 2.540303  | 4.567633  |
| H  | 4.519862  | 3.768452  | 2.029687  |
| H  | 4.710686  | 2.301402  | 1.055927  |
| H  | 5.378203  | 2.372237  | 2.707033  |
| H  | 5.686193  | 0.337686  | 1.111817  |
| H  | 6.593663  | -0.669880 | -0.034643 |
| H  | 6.469028  | -1.160922 | 1.666181  |
| H  | 2.239087  | -4.376846 | -1.918005 |
| H  | 1.578931  | -4.768936 | -0.320405 |
| H  | 3.226800  | -5.279302 | -0.747680 |
| H  | -0.055641 | -3.014966 | -4.544335 |
| H  | 0.992101  | -1.761575 | -2.686024 |
| H  | -1.763439 | -4.769090 | -4.064569 |
| H  | -2.401680 | -5.255406 | -1.705213 |
| H  | -1.349050 | -4.014221 | 0.153923  |
| H  | -2.509217 | -2.035797 | 3.951923  |
| H  | -1.612343 | -1.110178 | 1.827121  |
| H  | -1.315810 | -3.908326 | 5.089006  |
| H  | 0.760011  | -4.845502 | 4.084002  |
| H  | 1.637427  | -3.933577 | 1.954522  |
| Cu | -0.358161 | 0.292332  | -0.614884 |
| H  | -2.832173 | -1.475654 | 0.041240  |
| H  | -2.942404 | -1.384262 | -1.702687 |
| H  | -2.495623 | 0.955255  | -1.836981 |

142

Figure 1\_pc3\_major\_01 / electronic energy: -5826.83109267 a.u. / lowest freq: 13.73 cm<sup>-1</sup>

|   |           |           |           |
|---|-----------|-----------|-----------|
| P | 0.558075  | 0.782223  | -1.701306 |
| C | -0.143736 | -0.685577 | -3.939604 |
| C | -0.538554 | -0.904606 | -5.258694 |
| C | 0.005795  | 0.615526  | -3.443227 |
| C | -0.802127 | 0.179073  | -6.094869 |

|   |           |           |           |
|---|-----------|-----------|-----------|
| C | -0.270939 | 1.697230  | -4.290390 |
| C | -0.671867 | 1.480161  | -5.606810 |
| C | 3.988278  | 2.847132  | -2.787018 |
| C | 2.682116  | 2.362203  | -2.778655 |
| C | 2.286606  | 1.406642  | -1.833695 |
| C | 4.912023  | 2.393984  | -1.844173 |
| C | 4.527522  | 1.441501  | -0.903054 |
| C | 3.225421  | 0.944446  | -0.907733 |
| C | -1.738477 | 2.642788  | -1.457716 |
| C | -0.318830 | 2.246604  | -1.075779 |
| C | 0.078987  | 3.095036  | -0.103526 |
| C | -2.616493 | 2.266819  | -0.229648 |
| C | -2.166267 | 3.289773  | 0.832027  |
| C | -1.062557 | 4.112104  | 0.104256  |
| C | -0.723655 | 5.413111  | 0.802299  |
| C | -1.653341 | 4.190572  | -1.345817 |
| C | -3.007503 | 4.899397  | -1.447553 |
| C | -0.730549 | 4.846368  | -2.376009 |
| C | 1.272787  | 3.062861  | 0.779681  |
| C | 2.268091  | 4.004897  | 0.708356  |
| C | 1.457871  | 2.134533  | 1.891149  |
| S | 3.403954  | 3.800241  | 1.995423  |
| C | 2.554097  | 2.448332  | 2.664888  |
| C | 2.483578  | 5.084788  | -0.303872 |
| C | 3.065839  | 1.852993  | 3.941585  |
| P | 0.350908  | 0.680984  | 2.043873  |
| C | 3.305475  | -2.029027 | 3.060567  |
| C | 2.636790  | -0.931950 | 2.522009  |
| C | 2.667263  | -2.861850 | 3.980110  |
| C | 1.320992  | -0.629684 | 2.903608  |
| C | 1.358221  | -2.576174 | 4.364277  |
| C | 0.693943  | -1.469451 | 3.835541  |
| C | -3.161595 | 0.940877  | 4.134702  |
| C | -2.157581 | 0.587621  | 3.234254  |
| C | -2.909585 | 1.893877  | 5.120871  |
| C | -0.884189 | 1.168392  | 3.319002  |
| C | -1.648933 | 2.487044  | 5.205781  |
| C | -0.641521 | 2.125797  | 4.312034  |
| H | 0.031874  | -1.537552 | -3.276377 |
| H | -0.651005 | -1.925930 | -5.629220 |
| H | -1.116834 | 0.010640  | -7.127408 |
| H | -0.185770 | 2.719107  | -3.918606 |
| H | -0.888044 | 2.333168  | -6.254130 |
| H | 4.284677  | 3.589478  | -3.531503 |
| H | 1.973933  | 2.735545  | -3.520130 |
| H | 5.932900  | 2.783007  | -1.846364 |
| H | 5.244115  | 1.084860  | -0.161589 |
| H | 2.927089  | 0.192862  | -0.177905 |
| H | -2.107684 | 2.244090  | -2.411372 |
| H | -2.446426 | 1.229084  | 0.079926  |
| H | -3.685853 | 2.354453  | -0.466937 |
| H | -1.771664 | 2.827983  | 1.743028  |
| H | -2.987049 | 3.952024  | 1.145405  |
| H | -1.636432 | 6.010504  | 0.952516  |
| H | -0.014388 | 6.024571  | 0.226709  |
| H | -0.282764 | 5.228290  | 1.794370  |
| H | -3.434176 | 4.751750  | -2.452658 |
| H | -2.882690 | 5.984199  | -1.302936 |
| H | -3.753778 | 4.554310  | -0.721576 |
| H | -1.192533 | 4.811377  | -3.375453 |
| H | 0.252617  | 4.363238  | -2.444349 |
| H | -0.569601 | 5.909040  | -2.133696 |
| H | 1.725011  | 5.022066  | -1.092773 |
| H | 3.469980  | 4.986019  | -0.781971 |
| H | 2.429883  | 6.087768  | 0.147938  |
| H | 3.949269  | 1.216367  | 3.775126  |
| H | 2.299324  | 1.236180  | 4.425398  |
| H | 3.357938  | 2.646255  | 4.646180  |
| H | 4.335132  | -2.233704 | 2.758183  |
| H | 3.159922  | -0.290116 | 1.810055  |
| H | 3.188723  | -3.726258 | 4.397212  |
| H | 0.845094  | -3.216125 | 5.086039  |
| H | -0.328675 | -1.262752 | 4.159136  |
| H | -4.148212 | 0.479255  | 4.052086  |
| H | -2.377928 | -0.131963 | 2.442236  |
| H | -3.697868 | 2.182039  | 5.820310  |
| H | -1.449074 | 3.240435  | 5.971489  |
| H | 0.335053  | 2.610504  | 4.379790  |
| C | 0.867610  | -3.106158 | -0.256968 |
| C | 1.942691  | -2.317385 | -0.611612 |
| C | 2.626393  | -2.409438 | -1.941723 |
| O | 3.670022  | -3.407057 | -1.914503 |
| P | 5.124321  | -3.253226 | -1.286706 |
| O | 6.258251  | -3.080862 | -2.212843 |
| O | 4.911406  | -2.051444 | -0.230296 |
| O | 5.282415  | -4.580031 | -0.404260 |
| C | 6.032355  | -1.548977 | 0.484246  |
| H | 0.609146  | -3.260220 | 0.795414  |
| H | 0.410158  | -3.803741 | -0.968370 |
| H | 2.530737  | -1.854570 | 0.183317  |
| H | 1.936339  | -2.749972 | -2.724849 |
| H | 3.056920  | -1.446319 | -2.252571 |
| B | -4.294943 | -1.136305 | -1.175987 |
| O | -5.292771 | -1.815114 | -1.827469 |
| O | -4.756189 | -0.517080 | -0.039456 |
| C | -6.539663 | -1.534303 | -1.165889 |
| C | -6.061550 | -1.037354 | 0.249416  |

|    |           |           |           |
|----|-----------|-----------|-----------|
| C  | -7.382807 | -2.799631 | -1.143965 |
| C  | -7.245609 | -0.446824 | -1.973626 |
| C  | -5.874601 | -2.175034 | 1.254102  |
| C  | -6.912318 | 0.064348  | 0.861603  |
| H  | -5.251845 | -2.981069 | 0.838160  |
| H  | -6.837260 | -2.600451 | 1.573209  |
| H  | -5.359897 | -1.782544 | 2.143327  |
| H  | -6.934212 | 0.962585  | 0.230311  |
| H  | -6.496122 | 0.350303  | 1.839132  |
| H  | -7.945212 | -0.281146 | 1.019276  |
| H  | -6.654949 | 0.481101  | -2.002879 |
| H  | -8.238342 | -0.216922 | -1.560422 |
| H  | -7.377716 | -0.796526 | -3.008295 |
| H  | -8.310640 | -2.639879 | -0.573960 |
| H  | -6.837524 | -3.643298 | -0.700895 |
| H  | -7.660099 | -3.077974 | -2.171760 |
| C  | -1.969580 | -2.984409 | 1.613685  |
| C  | -2.267447 | -4.185650 | 2.244183  |
| C  | -2.220418 | -2.769741 | 0.237823  |
| C  | -2.834813 | -5.245270 | 1.526095  |
| C  | -2.784652 | -3.856023 | -0.465299 |
| C  | -3.083926 | -5.065421 | 0.166390  |
| C  | -1.882840 | -1.478222 | -0.399431 |
| C  | -2.781626 | -1.102108 | -1.596353 |
| H  | -3.524990 | -5.878421 | -0.418070 |
| H  | -3.004505 | -3.751399 | -1.530212 |
| H  | -3.072272 | -6.190828 | 2.019270  |
| H  | -2.057728 | -4.299190 | 3.311967  |
| H  | -1.515817 | -2.175070 | 2.192445  |
| Cu | 0.122437  | -1.259346 | -0.691425 |
| H  | -2.611145 | -1.744492 | -2.477414 |
| H  | -2.527644 | -0.084488 | -1.939378 |
| H  | -1.996545 | -0.697309 | 0.369549  |
| H  | 5.660355  | -0.798979 | 1.193722  |
| H  | 6.757197  | -1.081464 | -0.198570 |
| H  | 6.536067  | -2.351205 | 1.046747  |
| C  | 4.256779  | -4.991418 | 0.492673  |
| H  | 4.654094  | -5.836136 | 1.069114  |
| H  | 3.360884  | -5.314966 | -0.057902 |
| H  | 3.980371  | -4.180678 | 1.184565  |

142

Figure 1\_pc3\_major\_02 / electronic energy: -5826.83024921 a.u. / lowest freq: 19.64 cm-1

|   |           |           |           |
|---|-----------|-----------|-----------|
| C | 0.855304  | 3.120995  | 0.980769  |
| C | 1.984661  | 2.541541  | 0.439823  |
| C | 2.794982  | 1.550791  | 1.218151  |
| O | 3.643299  | 2.227695  | 2.171287  |
| P | 5.229721  | 2.135086  | 2.104779  |
| O | 5.877567  | 0.808724  | 2.153777  |
| O | 5.536298  | 2.991857  | 0.775638  |
| O | 5.661394  | 3.059348  | 3.335258  |
| C | 6.850936  | 3.025201  | 0.237718  |
| H | 0.426824  | 4.031399  | 0.551007  |
| H | 0.522508  | 2.861055  | 1.992596  |
| H | 2.463723  | 3.000246  | -0.432385 |
| H | 2.138927  | 0.900736  | 1.807589  |
| H | 3.408661  | 0.917506  | 0.565666  |
| B | -3.751962 | 1.333297  | 1.715476  |
| O | -4.337435 | 1.730681  | 2.891411  |
| O | -4.688321 | 1.071131  | 0.744452  |
| C | -5.761128 | 1.558199  | 2.764835  |
| C | -5.957738 | 1.555178  | 1.203956  |
| C | -6.467041 | 2.692980  | 3.489406  |
| C | -6.109289 | 0.220049  | 3.414837  |
| C | -6.141002 | 2.955501  | 0.618440  |
| C | -7.057140 | 0.631461  | 0.703803  |
| H | -5.354707 | 3.642967  | 0.964304  |
| H | -7.121915 | 3.379780  | 0.877859  |
| H | -6.069034 | 2.895591  | -0.477310 |
| H | -6.854377 | -0.418021 | 0.954523  |
| H | -7.138429 | 0.707557  | -0.390915 |
| H | -8.029417 | 0.914496  | 1.134916  |
| H | -5.614957 | -0.616645 | 2.898542  |
| H | -7.193938 | 0.039046  | 3.417906  |
| H | -5.759308 | 0.227837  | 4.457853  |
| H | -7.553777 | 2.642600  | 3.323122  |
| H | -6.105056 | 3.673679  | 3.153902  |
| H | -6.285308 | 2.615914  | 4.571787  |
| C | -2.948465 | 3.326607  | -1.534776 |
| C | -3.474315 | 4.576534  | -1.850809 |
| C | -2.374033 | 3.049572  | -0.273319 |
| C | -3.465443 | 5.610934  | -0.911026 |
| C | -2.390701 | 4.108795  | 0.661812  |
| C | -2.922468 | 5.359654  | 0.350064  |
| C | -1.823894 | 1.713253  | 0.049408  |
| C | -2.205256 | 1.224350  | 1.462924  |
| H | -2.916367 | 6.148384  | 1.108015  |
| H | -1.980499 | 3.945496  | 1.661490  |
| H | -3.886388 | 6.589681  | -1.153166 |
| H | -3.917249 | 4.739420  | -2.837909 |
| H | -3.005121 | 2.522250  | -2.274503 |
| P | 1.050691  | 0.247521  | -1.882153 |
| C | 3.370885  | -1.134907 | -1.136703 |
| C | 4.738325  | -1.265509 | -0.903257 |
| C | 2.864051  | -0.010093 | -1.799248 |
| C | 5.618902  | -0.268190 | -1.319197 |
| C | 3.754948  | 0.992363  | -2.206192 |
| C | 5.122287  | 0.860984  | -1.969172 |

|    |           |           |           |
|----|-----------|-----------|-----------|
| C  | -0.523293 | 2.958935  | -4.517183 |
| C  | -0.216995 | 2.207264  | -3.383067 |
| C  | 0.810727  | 1.257485  | -3.405854 |
| C  | 0.204027  | 2.773784  | -5.690861 |
| C  | 1.247185  | 1.845998  | -5.719579 |
| C  | 1.551212  | 1.094737  | -4.586244 |
| C  | 0.856039  | -2.088967 | -3.664567 |
| C  | 0.371249  | -1.348014 | -2.421742 |
| C  | -0.682707 | -2.038717 | -1.933573 |
| C  | 1.496027  | -3.410177 | -3.161322 |
| C  | 0.280398  | -4.179001 | -2.607827 |
| C  | -0.919123 | -3.223570 | -2.897113 |
| C  | -2.264854 | -3.916724 | -2.846870 |
| C  | -0.487973 | -2.581643 | -4.260627 |
| C  | -0.347662 | -3.579265 | -5.414011 |
| C  | -1.385611 | -1.444341 | -4.755904 |
| C  | -1.470740 | -1.958427 | -0.677195 |
| C  | -2.807487 | -1.632258 | -0.660865 |
| C  | -1.014323 | -2.499898 | 0.595402  |
| S  | -3.517810 | -2.037026 | 0.861169  |
| C  | -2.033449 | -2.619434 | 1.517703  |
| C  | -3.655150 | -1.007537 | -1.722661 |
| C  | -2.041746 | -3.167978 | 2.912217  |
| P  | 0.733284  | -2.976907 | 0.855495  |
| C  | 1.152105  | -0.192884 | 3.935416  |
| C  | 0.573377  | -0.985240 | 2.942771  |
| C  | 2.527201  | -0.240951 | 4.162640  |
| C  | 1.361027  | -1.847414 | 2.169532  |
| C  | 3.328455  | -1.068160 | 3.376044  |
| C  | 2.749071  | -1.857196 | 2.383662  |
| C  | 1.187445  | -6.185933 | 3.461481  |
| C  | 1.303260  | -4.921976 | 2.880756  |
| C  | 0.338049  | -7.142231 | 2.907502  |
| C  | 0.565426  | -4.592636 | 1.737409  |
| C  | -0.392068 | -6.828038 | 1.760096  |
| C  | -0.275006 | -5.567810 | 1.177761  |
| H  | 2.685254  | -1.904481 | -0.773163 |
| H  | 5.115867  | -2.147654 | -0.381277 |
| H  | 6.689403  | -0.368036 | -1.128048 |
| H  | 3.383877  | 1.892432  | -2.701146 |
| H  | 5.803495  | 1.651477  | -2.291080 |
| H  | -1.329846 | 3.694682  | -4.474557 |
| H  | -0.785862 | 2.363456  | -2.464678 |
| H  | -0.032776 | 3.358422  | -6.583057 |
| H  | 1.829264  | 1.705291  | -6.633283 |
| H  | 2.381064  | 0.386458  | -4.625153 |
| H  | 1.496795  | -1.514509 | -4.342655 |
| H  | 2.267145  | -3.228047 | -2.404023 |
| H  | 1.978464  | -3.944147 | -3.992692 |
| H  | 0.365222  | -4.388885 | -1.532777 |
| H  | 0.129344  | -5.144491 | -3.113440 |
| H  | -2.282903 | -4.750207 | -3.566228 |
| H  | -3.091326 | -3.238356 | -3.099923 |
| H  | -2.466358 | -4.334914 | -1.848528 |
| H  | 0.193955  | -3.111048 | -6.251750 |
| H  | -1.341203 | -3.868134 | -5.791922 |
| H  | 0.183095  | -4.503721 | -5.153042 |
| H  | -0.983746 | -1.028451 | -5.693531 |
| H  | -1.468113 | -0.615104 | -4.041660 |
| H  | -2.400839 | -1.814207 | -4.971165 |
| H  | -4.459017 | -1.681898 | -2.058264 |
| H  | -3.042226 | -0.742046 | -2.593099 |
| H  | -4.127438 | -0.092317 | -1.333255 |
| H  | -2.663527 | -2.548434 | 3.575987  |
| H  | -1.033229 | -3.211121 | 3.338085  |
| H  | -2.450881 | -4.191387 | 2.928288  |
| H  | 0.519919  | 0.472156  | 4.528688  |
| H  | -0.500975 | -0.918437 | 2.770134  |
| H  | 2.980109  | 0.391079  | 4.929596  |
| H  | 4.412264  | -1.064500 | 3.503201  |
| H  | 3.389097  | -2.491254 | 1.763307  |
| H  | 1.762917  | -6.419254 | 4.360771  |
| H  | 1.965765  | -4.185172 | 3.340475  |
| H  | 0.243298  | -8.128285 | 3.368211  |
| H  | -1.061982 | -7.568264 | 1.315807  |
| H  | -0.862273 | -5.334630 | 0.284949  |
| Cu | 0.186165  | 1.597813  | -0.201144 |
| H  | -1.659378 | 1.751468  | 2.265775  |
| H  | -1.911547 | 0.166806  | 1.568799  |
| H  | -2.234774 | 0.999634  | -0.678625 |
| H  | 6.793696  | 3.538868  | -0.730055 |
| H  | 7.248999  | 2.009976  | 0.094007  |
| H  | 7.530240  | 3.588251  | 0.897788  |
| C  | 5.164047  | 4.383221  | 3.489475  |
| H  | 5.710153  | 4.839150  | 4.324791  |
| H  | 4.088357  | 4.373041  | 3.719679  |
| H  | 5.333462  | 4.978599  | 2.579254  |

142

Figure 1\_pc3\_major\_03 / electronic energy: -5826.82859981 a.u. / lowest freq: 5.22 cm<sup>-1</sup>

|   |           |           |          |
|---|-----------|-----------|----------|
| P | -0.611888 | -1.368369 | 1.360996 |
| C | 0.251262  | -1.198982 | 3.980939 |
| C | 0.269468  | -1.470578 | 5.347954 |
| C | -0.751647 | -1.731440 | 3.157345 |
| C | -0.725030 | -2.266611 | 5.915128 |
| C | -1.741237 | -2.535526 | 3.737333 |
| C | -1.731254 | -2.796069 | 5.107031 |
| C | 0.552113  | -5.283901 | 0.653958 |

|   |           |           |           |
|---|-----------|-----------|-----------|
| C | -0.064459 | -4.167648 | 1.217600  |
| C | 0.191065  | -2.890202 | 0.707052  |
| C | 1.419771  | -5.136955 | -0.429479 |
| C | 1.676805  | -3.866598 | -0.943796 |
| C | 1.070452  | -2.752911 | -0.368109 |
| C | -3.572299 | -1.050715 | 1.350981  |
| C | -2.295456 | -1.538383 | 0.678373  |
| C | -2.655360 | -2.000517 | -0.540150 |
| C | -4.015779 | 0.207772  | 0.544276  |
| C | -4.467119 | -0.382353 | -0.802745 |
| C | -4.194650 | -1.902597 | -0.635144 |
| C | -4.891200 | -2.749368 | -1.680354 |
| C | -4.593369 | -2.119617 | 0.864426  |
| C | -6.050701 | -1.784772 | 1.199157  |
| C | -4.339106 | -3.539558 | 1.376289  |
| C | -1.841821 | -2.372933 | -1.723844 |
| C | -1.796184 | -3.652159 | -2.217919 |
| C | -1.156618 | -1.412119 | -2.582439 |
| S | -0.973621 | -3.694007 | -3.737364 |
| C | -0.684182 | -1.987784 | -3.742618 |
| C | -2.309075 | -4.923605 | -1.620040 |
| C | -0.038904 | -1.390320 | -4.956715 |
| P | -0.895305 | 0.315139  | -2.012820 |
| C | 3.022254  | 0.441657  | -3.360748 |
| C | 1.800199  | -0.001836 | -2.861830 |
| C | 3.165337  | 1.755563  | -3.804481 |
| C | 0.688636  | 0.851247  | -2.803526 |
| C | 2.074285  | 2.620409  | -3.736329 |
| C | 0.849084  | 2.174486  | -3.238858 |
| C | -3.485669 | 3.324462  | -3.017954 |
| C | -2.513932 | 2.537592  | -2.399260 |
| C | -4.129766 | 2.865082  | -4.166099 |
| C | -2.155017 | 1.292803  | -2.934481 |
| C | -3.793373 | 1.617646  | -4.694972 |
| C | -2.811518 | 0.837627  | -4.085425 |
| H | 1.033474  | -0.566922 | 3.550914  |
| H | 1.065439  | -1.053579 | 5.968967  |
| H | -0.716317 | -2.474300 | 6.987757  |
| H | -2.525925 | -2.971319 | 3.120135  |
| H | -2.512830 | -3.423028 | 5.542498  |
| H | 0.351724  | -6.276335 | 1.064540  |
| H | -0.742991 | -4.301890 | 2.062545  |
| H | 1.897928  | -6.014893 | -0.870314 |
| H | 2.358874  | -3.739254 | -1.787536 |
| H | 1.278384  | -1.754734 | -0.749288 |
| H | -3.513316 | -0.888150 | 2.435349  |
| H | -3.188799 | 0.910819  | 0.416556  |
| H | -4.821174 | 0.743645  | 1.065271  |
| H | -3.917738 | 0.025579  | -1.659061 |
| H | -5.535186 | -0.207508 | -1.000277 |
| H | -5.974239 | -2.550377 | -1.664382 |
| H | -4.747036 | -3.825754 | -1.515388 |
| H | -4.526256 | -2.511056 | -2.691475 |
| H | -6.197907 | -1.808672 | 2.290808  |
| H | -6.726668 | -2.538643 | 0.765149  |
| H | -6.385573 | -0.801605 | 0.845799  |
| H | -4.582704 | -3.613473 | 2.448003  |
| H | -3.300786 | -3.868384 | 1.241202  |
| H | -4.990142 | -4.256650 | 0.851618  |
| H | -2.744944 | -4.733444 | -0.631769 |
| H | -1.495904 | -5.653651 | -1.489740 |
| H | -3.078739 | -5.393553 | -2.252519 |
| H | 1.042623  | -1.593607 | -4.993380 |
| H | -0.174672 | -0.302887 | -4.985379 |
| H | -0.486322 | -1.810821 | -5.870406 |
| H | 3.870410  | -0.244351 | -3.386531 |
| H | 1.710123  | -1.039636 | -2.539385 |
| H | 4.123019  | 2.106163  | -4.196454 |
| H | 2.171461  | 3.654824  | -4.074640 |
| H | 0.011131  | 2.874121  | -3.202421 |
| H | -3.740160 | 4.291024  | -2.577479 |
| H | -2.051183 | 2.915166  | -1.483171 |
| H | -4.899408 | 3.474145  | -4.646491 |
| H | -4.299966 | 1.246363  | -5.589122 |
| H | -2.571062 | -0.143217 | -4.500919 |
| C | 0.821821  | 2.492160  | 1.851750  |
| C | -0.313504 | 1.997569  | 2.449771  |
| C | -1.678480 | 2.283629  | 1.919932  |
| O | -2.109971 | 3.602068  | 2.328392  |
| P | -3.045692 | 4.431619  | 1.336823  |
| O | -2.525299 | 4.717988  | -0.017171 |
| O | -4.404419 | 3.570824  | 1.373737  |
| O | -3.334714 | 5.757789  | 2.168864  |
| C | -5.318690 | 3.587315  | 0.282709  |
| H | 1.767363  | 2.542301  | 2.397504  |
| H | 0.755380  | 3.090073  | 0.934761  |
| H | -0.255086 | 1.614529  | 3.474643  |
| H | -1.673216 | 2.235539  | 0.820006  |
| H | -2.409044 | 1.560016  | 2.304795  |
| B | 4.803806  | 1.410403  | -0.386488 |
| O | 5.800445  | 2.328473  | -0.160732 |
| O | 5.297306  | 0.241703  | -0.913866 |
| C | 7.020976  | 1.812210  | -0.720092 |
| C | 6.726357  | 0.268790  | -0.785500 |
| C | 8.186067  | 2.196721  | 0.178027  |
| C | 7.186936  | 2.446172  | -2.100303 |
| C | 7.069035  | -0.463156 | 0.512311  |



|    |           |           |           |
|----|-----------|-----------|-----------|
| C  | 7.354534  | -0.446294 | -1.971141 |
| H  | 6.631729  | 0.041503  | 1.387045  |
| H  | 8.155513  | -0.549416 | 0.659639  |
| H  | 6.643748  | -1.476652 | 0.469886  |
| H  | 6.991842  | -0.046023 | -2.927243 |
| H  | 7.105962  | -1.517523 | -1.935160 |
| H  | 8.450793  | -0.351993 | -1.945268 |
| H  | 6.357169  | 2.170945  | -2.768509 |
| H  | 8.132812  | 2.147860  | -2.574973 |
| H  | 7.185717  | 3.541092  | -1.993996 |
| H  | 9.117378  | 1.725381  | -0.171080 |
| H  | 8.009965  | 1.897864  | 1.219716  |
| H  | 8.330504  | 3.287333  | 0.158142  |
| C  | 3.315351  | -1.487540 | 2.146138  |
| C  | 3.858122  | -1.959854 | 3.334583  |
| C  | 3.303612  | -0.109809 | 1.816308  |
| C  | 4.430148  | -1.078673 | 4.259286  |
| C  | 3.914815  | 0.755259  | 2.753848  |
| C  | 4.457263  | 0.280754  | 3.949860  |
| C  | 2.649270  | 0.377584  | 0.581045  |
| C  | 3.289564  | 1.630399  | -0.039774 |
| H  | 4.913864  | 0.989564  | 4.647175  |
| H  | 3.972131  | 1.825963  | 2.543026  |
| H  | 4.857210  | -1.449366 | 5.194227  |
| H  | 3.836313  | -3.033400 | 3.543205  |
| H  | 2.874557  | -2.198346 | 1.442950  |
| Cu | 0.702148  | 0.555778  | 1.198212  |
| H  | 3.196481  | 2.523809  | 0.600179  |
| H  | 2.748600  | 1.896397  | -0.963995 |
| H  | 2.679895  | -0.428665 | -0.166138 |
| H  | -6.230340 | 3.079771  | 0.622136  |
| H  | -4.905348 | 3.052490  | -0.584214 |
| H  | -5.575639 | 4.616639  | -0.011619 |
| C  | -3.887924 | 5.731890  | 3.480511  |
| H  | -4.124617 | 6.769274  | 3.747539  |
| H  | -3.162875 | 5.326711  | 4.201820  |
| H  | -4.809974 | 5.131597  | 3.508783  |

142

Figure 1\_pc3\_major\_04 / electronic energy: -5826.82790049 a.u. / lowest freq: 12.27 cm-1

|   |           |           |           |
|---|-----------|-----------|-----------|
| C | 1.326535  | 1.894445  | -1.827356 |
| C | 0.414642  | 2.339057  | -0.896143 |
| C | -1.062814 | 2.160390  | -1.039596 |
| O | -1.653387 | 3.251044  | -1.783698 |
| F | -2.039547 | 4.682936  | -1.206848 |
| O | -3.475834 | 5.009080  | -1.093949 |
| O | -1.214393 | 4.712793  | 0.174673  |
| O | -1.305334 | 5.708414  | -2.190878 |
| C | -1.449892 | 5.748167  | 1.122121  |
| H | 2.331829  | 2.320826  | -1.880854 |
| H | 0.992519  | 1.311808  | -2.693989 |
| H | 0.733378  | 3.094844  | -0.168569 |
| H | -1.297512 | 1.265417  | -1.623417 |
| H | -1.555516 | 2.082962  | -0.063045 |
| B | 5.451024  | -0.836696 | -1.597764 |
| O | 6.396284  | -0.191833 | -2.353392 |
| O | 6.020849  | -1.651850 | -0.649541 |
| C | 7.693306  | -0.689618 | -1.977331 |
| C | 7.412365  | -1.305284 | -0.556629 |
| C | 8.685984  | 0.461902  | -1.981935 |
| C | 8.093356  | -1.735199 | -3.016354 |
| C | 7.540522  | -0.281074 | 0.571838  |
| C | 8.220451  | -2.550420 | -0.229417 |
| H | 6.981649  | 0.639674  | 0.345895  |
| H | 8.590760  | -0.018867 | 0.765901  |
| H | 7.115202  | -0.710160 | 1.491265  |
| H | 8.025138  | -3.362611 | -0.941947 |
| H | 7.956019  | -2.911354 | 0.775722  |
| H | 9.298368  | -2.328267 | -0.237387 |
| H | 7.392396  | -2.583243 | -3.023244 |
| H | 9.107234  | -2.120992 | -2.836668 |
| H | 8.073810  | -1.273200 | -4.014366 |
| H | 9.664589  | 0.132766  | -1.600568 |
| H | 8.333590  | 1.300860  | -1.367661 |
| H | 8.827805  | 0.830251  | -3.008986 |
| C | 3.949409  | 1.510284  | 1.504058  |
| C | 4.480133  | 2.697267  | 1.995305  |
| C | 3.991104  | 1.178880  | 0.125341  |
| C | 5.087287  | 3.619616  | 1.135627  |
| C | 4.620831  | 2.123450  | -0.719747 |
| C | 5.153572  | 3.314234  | -0.223543 |
| C | 3.357861  | -0.061621 | -0.371215 |
| C | 3.899282  | -0.621333 | -1.701340 |
| H | 5.634792  | 4.011724  | -0.915635 |
| H | 4.715669  | 1.913597  | -1.787031 |
| H | 5.508178  | 4.550936  | 1.522024  |
| H | 4.425612  | 2.902024  | 3.068545  |
| H | 3.493578  | 0.802551  | 2.200528  |
| P | 0.235634  | -0.411443 | 1.492956  |
| C | -2.187357 | -0.151897 | 2.954972  |
| C | -3.148268 | 0.586304  | 3.643595  |
| C | -1.116064 | 0.493188  | 2.330799  |
| C | -3.047798 | 1.974626  | 3.713189  |
| C | -1.020527 | 1.889723  | 2.404613  |
| C | -1.980694 | 2.626020  | 3.094740  |
| C | 3.456802  | -1.805935 | 3.628283  |
| C | 2.475950  | -1.621169 | 2.658315  |
| C | 1.412651  | -0.730977 | 2.871584  |

|    |           |           |           |
|----|-----------|-----------|-----------|
| C  | 3.399212  | -1.091838 | 4.825936  |
| C  | 2.347945  | -0.204599 | 5.047681  |
| C  | 1.357503  | -0.027372 | 4.079540  |
| C  | -0.087564 | -3.382768 | 1.776666  |
| C  | -0.368779 | -2.070569 | 1.044733  |
| C  | -1.018614 | -2.396058 | -0.093349 |
| C  | -1.455474 | -3.930048 | 2.263340  |
| C  | -2.160042 | -4.310469 | 0.945324  |
| C  | -1.113208 | -3.932208 | -0.146144 |
| C  | -1.382107 | -4.547910 | -1.504316 |
| C  | 0.229264  | -4.318079 | 0.577487  |
| C  | 0.352436  | -5.802452 | 0.936017  |
| C  | 1.507897  | -3.936292 | -0.174090 |
| C  | -1.589350 | -1.549586 | -1.171178 |
| C  | -0.886917 | -1.291048 | -2.325488 |
| C  | -2.964773 | -1.080174 | -1.236151 |
| S  | -1.889187 | -0.499879 | -3.488171 |
| C  | -3.267051 | -0.493712 | -2.448124 |
| C  | 0.535685  | -1.613466 | -2.659249 |
| C  | -4.558464 | 0.054741  | -2.970626 |
| P  | -4.159961 | -1.397420 | 0.124076  |
| C  | -4.953068 | 2.657356  | 0.656253  |
| C  | -4.413766 | 1.470833  | 0.153946  |
| C  | -5.935550 | 2.613881  | 1.643454  |
| C  | -4.841443 | 0.229880  | 0.634293  |
| C  | -6.368660 | 1.381557  | 2.136128  |
| C  | -5.815418 | 0.201694  | 1.645986  |
| C  | -7.837036 | -2.240790 | -1.665649 |
| C  | -6.827127 | -1.576628 | -0.968300 |
| C  | -7.600585 | -3.496466 | -2.222797 |
| C  | -5.564269 | -2.159529 | -0.812005 |
| C  | -6.346619 | -4.089807 | -2.069577 |
| C  | -5.342516 | -3.431110 | -1.362739 |
| H  | -2.278199 | -1.237131 | 2.900370  |
| H  | -3.983759 | 0.072488  | 4.122961  |
| H  | -3.805821 | 2.551738  | 4.247378  |
| H  | -0.184161 | 2.405142  | 1.925279  |
| H  | -1.896217 | 3.712807  | 3.150963  |
| H  | 4.275930  | -2.503527 | 3.439937  |
| H  | 2.545749  | -2.173100 | 1.720161  |
| H  | 4.173512  | -1.226842 | 5.584702  |
| H  | 2.291009  | 0.355173  | 5.984125  |
| H  | 0.543459  | 0.673039  | 4.275422  |
| H  | 0.670897  | -3.340162 | 2.565544  |
| H  | -2.011628 | -3.184325 | 2.845954  |
| H  | -1.307077 | -4.800428 | 2.918772  |
| H  | -3.101436 | -3.767593 | 0.796959  |
| H  | -2.390306 | -5.384779 | 0.890434  |
| H  | -1.482938 | -5.640783 | -1.417149 |
| H  | -0.573892 | -4.339451 | -2.220529 |
| H  | -2.313860 | -4.160269 | -1.943973 |
| H  | 1.181062  | -5.948822 | 1.647303  |
| H  | 0.589357  | -6.391542 | 0.035747  |
| H  | -0.547901 | -6.240305 | 1.384591  |
| H  | 2.391053  | -4.242566 | 0.408866  |
| H  | 1.593305  | -2.860009 | -0.365404 |
| H  | 1.565723  | -4.460488 | -1.141264 |
| H  | 0.689019  | -2.695518 | -2.787224 |
| H  | 1.205881  | -1.272252 | -1.857369 |
| H  | 0.854455  | -1.120914 | -3.588483 |
| H  | -4.383210 | 0.900208  | -3.651950 |
| H  | -5.204725 | 0.406399  | -2.158533 |
| H  | -5.113040 | -0.718587 | -3.527019 |
| H  | -4.602809 | 3.609454  | 0.248494  |
| H  | -3.662028 | 1.522739  | -0.634651 |
| H  | -6.363622 | 3.540890  | 2.032640  |
| H  | -7.134003 | 1.338368  | 2.914830  |
| H  | -6.148994 | -0.756950 | 2.055547  |
| H  | -8.813717 | -1.764493 | -1.781137 |
| H  | -7.028924 | -0.585848 | -0.556103 |
| H  | -8.391125 | -4.012970 | -2.772372 |
| H  | -6.149651 | -5.075212 | -2.498661 |
| H  | -4.368986 | -3.914351 | -1.242861 |
| Cu | 1.417932  | 0.599212  | -0.231439 |
| H  | 3.644517  | 0.017216  | -2.565077 |
| H  | 3.416626  | -1.594785 | -1.897724 |
| H  | 3.463579  | -0.833746 | 0.403344  |
| H  | -0.689647 | 5.646665  | 1.906452  |
| H  | -2.452661 | 5.656112  | 1.564116  |
| H  | -1.347151 | 6.741449  | 0.658098  |
| C  | 0.070912  | 5.567353  | -2.523526 |
| H  | 0.330833  | 6.408727  | -3.177975 |
| H  | 0.250747  | 4.622288  | -3.057664 |
| H  | 0.703679  | 5.603376  | -1.623068 |

142

Figure 1\_ts(AS)\_major\_01 / electronic energy: -5826.79676454 a.u. / lowest freq: -342.36 cm-1

|   |           |          |           |
|---|-----------|----------|-----------|
| P | -0.324270 | 1.952480 | 0.257176  |
| C | 0.435040  | 3.932915 | -1.523402 |
| C | 0.455822  | 5.209031 | -2.083527 |
| C | -0.418483 | 3.639876 | -0.451010 |
| C | -0.384177 | 6.204045 | -1.585202 |
| C | -1.249118 | 4.649374 | 0.051295  |
| C | -1.235871 | 5.921911 | -0.516889 |
| C | 1.901862  | 3.500506 | 3.384701  |
| C | 1.013444  | 3.400516 | 2.313491  |
| C | 0.782155  | 2.161771 | 1.706848  |
| C | 2.561614  | 2.367454 | 3.860533  |

|   |           |           |           |
|---|-----------|-----------|-----------|
| C | 2.332864  | 1.128647  | 3.260682  |
| C | 1.452428  | 1.033637  | 2.187443  |
| C | -3.289365 | 2.042783  | 0.369527  |
| C | -1.959034 | 1.621112  | 0.985416  |
| C | -2.256417 | 0.888231  | 2.080079  |
| C | -3.941834 | 0.736050  | -0.172726 |
| C | -4.300670 | -0.030828 | 1.113485  |
| C | -3.789491 | 0.906073  | 2.244971  |
| C | -4.340196 | 0.559685  | 3.612852  |
| C | -4.133031 | 2.314475  | 1.648818  |
| C | -5.621814 | 2.550492  | 1.372653  |
| C | -3.655407 | 3.490133  | 2.504866  |
| C | -1.409770 | 0.026946  | 2.939303  |
| C | -1.097845 | 0.355175  | 4.233309  |
| C | -0.946840 | -1.303080 | 2.564492  |
| S | -0.282333 | -0.950206 | 5.016740  |
| C | -0.351657 | -1.966095 | 3.616981  |
| C | -1.291405 | 1.655688  | 4.943989  |
| C | 0.166009  | -3.367871 | 3.737199  |
| P | -1.123087 | -1.876999 | 0.829931  |
| C | 2.767486  | -3.360522 | 0.757770  |
| C | 1.631848  | -2.628837 | 1.100437  |
| C | 2.700379  | -4.344587 | -0.226257 |
| C | 0.397925  | -2.876992 | 0.484056  |
| C | 1.487399  | -4.578559 | -0.873578 |
| C | 0.349855  | -3.850816 | -0.525735 |
| C | -4.103707 | -4.462056 | -0.282985 |
| C | -3.073029 | -3.520670 | -0.279262 |
| C | -4.545591 | -5.030343 | 0.910758  |
| C | -2.448058 | -3.160793 | 0.924390  |
| C | -3.953615 | -4.647986 | 2.115104  |
| C | -2.912332 | -3.720728 | 2.122684  |
| H | 1.101208  | 3.161835  | -1.921136 |
| H | 1.131994  | 5.421804  | -2.914484 |
| H | -0.374824 | 7.201851  | -2.029835 |
| H | -1.908502 | 4.447267  | 0.894612  |
| H | -1.894756 | 6.697340  | -0.119563 |
| H | 2.080818  | 4.473652  | 3.847571  |
| H | 0.518198  | 4.300281  | 1.943834  |
| H | 3.261851  | 2.451247  | 4.694931  |
| H | 2.849885  | 0.236212  | 3.619671  |
| H | 1.286637  | 0.071046  | 1.706965  |
| H | -3.243649 | 2.857432  | -0.364725 |
| H | -3.252671 | 0.164115  | -0.799619 |
| H | -4.819758 | 0.959172  | -0.793433 |
| H | -3.828513 | -1.018719 | 1.174212  |
| H | -5.383592 | -0.193781 | 1.218256  |
| H | -5.439689 | 0.621018  | 3.602777  |
| H | -3.972116 | 1.235026  | 4.398726  |
| H | -4.069957 | -0.468777 | 3.898646  |
| H | -5.749160 | 3.478686  | 0.793234  |
| H | -6.168698 | 2.680877  | 2.319881  |
| H | -6.115709 | 1.745294  | 0.815593  |
| H | -3.888472 | 4.446008  | 2.009687  |
| H | -2.577564 | 3.470269  | 2.709898  |
| H | -4.181262 | 3.496031  | 3.472680  |
| H | -1.917562 | 2.326300  | 4.343338  |
| H | -0.324166 | 2.159147  | 5.104286  |
| H | -1.768760 | 1.524835  | 5.927270  |
| H | 1.260276  | -3.392735 | 3.857559  |
| H | -0.087098 | -3.963281 | 2.852447  |
| H | -0.272741 | -3.864605 | 4.616593  |
| H | 3.712241  | -3.144838 | 1.260279  |
| H | 1.712260  | -1.875594 | 1.884642  |
| H | 3.590936  | -4.915581 | -0.499200 |
| H | 1.420288  | -5.337010 | -1.657067 |
| H | -0.587413 | -4.057548 | -1.047575 |
| H | -4.577719 | -4.730665 | -1.230348 |
| H | -2.797563 | -3.037365 | -1.224810 |
| H | -5.359235 | -5.759781 | 0.906399  |
| H | -4.306148 | -5.072415 | 3.058389  |
| H | -2.475580 | -3.420950 | 3.076683  |
| C | 0.550563  | -0.223916 | -3.225611 |
| C | -0.367797 | 0.841118  | -3.331782 |
| C | -1.613859 | 0.790630  | -2.697783 |
| O | -3.019936 | 0.324561  | -4.097548 |
| P | -3.669149 | -1.019978 | -3.774014 |
| O | -2.900638 | -2.066953 | -3.031852 |
| O | -5.059604 | -0.636569 | -3.000035 |
| O | -4.211549 | -1.680341 | -5.160465 |
| C | -5.737774 | -1.617380 | -2.248411 |
| H | 1.475889  | -0.202467 | -3.801733 |
| H | 0.189877  | -1.221545 | -2.944624 |
| H | -0.073690 | 1.757731  | -3.852309 |
| H | -1.857482 | -0.098937 | -2.115170 |
| H | -2.169063 | 1.705084  | -2.495750 |
| B | 4.611780  | -1.324521 | -1.208933 |
| O | 5.623391  | -1.949122 | -1.891679 |
| O | 4.997104  | -0.946105 | 0.051006  |
| C | 6.712637  | -2.167433 | -0.975492 |
| C | 6.422665  | -1.098826 | 0.143483  |
| C | 8.029866  | -1.974914 | -1.709312 |
| C | 6.597878  | -3.604582 | -0.470743 |
| C | 7.034486  | 0.268918  | -0.157919 |
| C | 6.786885  | -1.534486 | 1.553577  |
| H | 6.778356  | 0.609884  | -1.172270 |
| H | 8.129412  | 0.255938  | -0.056806 |

|    |           |           |           |
|----|-----------|-----------|-----------|
| H  | 6.631211  | 1.004677  | 0.553333  |
| H  | 6.243583  | -2.439480 | 1.855792  |
| H  | 6.532877  | -0.734146 | 2.264382  |
| H  | 7.866579  | -1.730987 | 1.635005  |
| H  | 5.662717  | -3.758569 | 0.086581  |
| H  | 7.440831  | -3.874667 | 0.181494  |
| H  | 6.595676  | -4.289962 | -1.331241 |
| H  | 8.875018  | -2.038636 | -1.007325 |
| H  | 8.072799  | -1.005726 | -2.223046 |
| H  | 8.155868  | -2.764375 | -2.465261 |
| C  | 3.494482  | 2.359957  | -0.374981 |
| C  | 4.014770  | 3.624127  | -0.640561 |
| C  | 3.141166  | 1.472273  | -1.410704 |
| C  | 4.222599  | 4.042217  | -1.956094 |
| C  | 3.381779  | 1.906650  | -2.730092 |
| C  | 3.911080  | 3.167741  | -2.998657 |
| C  | 2.510487  | 0.150906  | -1.117594 |
| C  | 3.182388  | -1.041693 | -1.798566 |
| H  | 4.078379  | 3.470903  | -4.035753 |
| H  | 3.134470  | 1.248235  | -3.566362 |
| H  | 4.631543  | 5.033379  | -2.165857 |
| H  | 4.267617  | 4.286722  | 0.191473  |
| H  | 3.357160  | 2.044485  | 0.660643  |
| Cu | 0.575270  | 0.622523  | -1.421841 |
| H  | 3.274833  | -0.911679 | -2.889023 |
| H  | 2.572217  | -1.952405 | -1.673042 |
| H  | 2.529372  | -0.015095 | -0.031851 |
| H  | -6.692630 | -1.182907 | -1.918613 |
| H  | -5.161761 | -1.917470 | -1.358512 |
| H  | -5.956384 | -2.518699 | -2.846634 |
| C  | -4.942963 | -0.889453 | -6.071734 |
| H  | -5.227886 | -1.529985 | -6.918512 |
| H  | -4.340125 | -0.047054 | -6.448072 |
| H  | -5.860199 | -0.484648 | -5.611296 |

142

Figure 1\_ts(AS)\_major\_02 / electronic energy: -5826.79516945 a.u. / lowest freq: -325.10 cm-1

|   |           |           |           |
|---|-----------|-----------|-----------|
| C | 1.329593  | 2.025287  | -1.722547 |
| C | 0.396762  | 2.522587  | -0.786183 |
| C | -0.887668 | 1.990736  | -0.651337 |
| O | -2.276655 | 3.181384  | -1.606989 |
| P | -2.547753 | 4.590679  | -1.077607 |
| O | -3.932813 | 5.082227  | -0.830684 |
| O | -1.626748 | 4.680551  | 0.281197  |
| O | -1.810239 | 5.666168  | -2.063185 |
| C | -1.702409 | 5.836803  | 1.082343  |
| H | 2.284757  | 2.535557  | -1.856541 |
| H | 0.971808  | 1.442256  | -2.579920 |
| H | 0.707391  | 3.302818  | -0.084834 |
| H | -1.219772 | 1.189139  | -1.305169 |
| H | -1.442966 | 2.150840  | 0.268405  |
| B | 5.370015  | -0.432486 | -1.698714 |
| O | 6.374319  | 0.253015  | -2.323819 |
| O | 5.845496  | -1.335700 | -0.782733 |
| C | 7.633569  | -0.299892 | -1.891037 |
| C | 7.233930  | -1.031631 | -0.555323 |
| C | 8.635586  | 0.830414  | -1.717534 |
| C | 8.101295  | -1.259693 | -2.982536 |
| C | 7.291632  | -0.116894 | 0.668620  |
| C | 7.991211  | -2.320324 | -0.281485 |
| H | 6.767662  | 0.833797  | 0.489056  |
| H | 8.328805  | 0.103425  | 0.960000  |
| H | 6.793848  | -0.617364 | 1.512254  |
| H | 7.836773  | -3.063496 | -1.074799 |
| H | 7.644140  | -2.759000 | 0.665963  |
| H | 9.069989  | -2.124488 | -0.188417 |
| H | 7.391208  | -2.088980 | -3.119007 |
| H | 9.091277  | -1.680651 | -2.755697 |
| H | 8.171501  | -0.714141 | -3.935108 |
| H | 9.576914  | 0.451921  | -1.291299 |
| H | 8.245330  | 1.619927  | -1.062148 |
| H | 8.861192  | 1.282579  | -2.694657 |
| C | 3.861172  | 1.549668  | 1.528107  |
| C | 4.444605  | 2.633597  | 2.176829  |
| C | 3.892128  | 1.420518  | 0.123411  |
| C | 5.089249  | 3.633994  | 1.445169  |
| C | 4.548814  | 2.439844  | -0.594157 |
| C | 5.138090  | 3.524433  | 0.055843  |
| C | 3.244192  | 0.253469  | -0.538389 |
| C | 3.829884  | -0.168758 | -1.889881 |
| H | 5.646549  | 4.291329  | -0.534748 |
| H | 4.626916  | 2.375993  | -1.681231 |
| H | 5.552617  | 4.483731  | 1.951791  |
| H | 4.403084  | 2.691730  | 3.267848  |
| H | 3.380988  | 0.769112  | 2.121469  |
| P | 0.365776  | -0.667271 | 1.413115  |
| C | -0.737762 | 1.558669  | 2.632257  |
| C | -1.649682 | 2.262778  | 3.412920  |
| C | -0.888643 | 0.178684  | 2.435424  |
| C | -2.721112 | 1.593083  | 4.005483  |
| C | -1.957169 | -0.487383 | 3.039899  |
| C | -2.869276 | 0.219692  | 3.822953  |
| C | 3.825701  | -2.193454 | 2.984602  |
| C | 2.735186  | -1.927933 | 2.162215  |
| C | 1.684527  | -1.111883 | 2.606379  |
| C | 3.885579  | -1.639169 | 4.264117  |
| C | 2.841638  | -0.834911 | 4.717240  |
| C | 1.743859  | -0.572565 | 3.895494  |

|    |           |           |           |
|----|-----------|-----------|-----------|
| C  | 0.022643  | -3.639270 | 1.457552  |
| C  | -0.262853 | -2.270650 | 0.842220  |
| C  | -0.964455 | -2.488883 | -0.291033 |
| C  | -1.337182 | -4.191792 | 1.961751  |
| C  | -2.109173 | -4.446150 | 0.650304  |
| C  | -1.099451 | -4.011990 | -0.456791 |
| C  | -1.437318 | -4.511374 | -1.846601 |
| C  | 0.258951  | -4.488445 | 0.177066  |
| C  | 0.349849  | -5.998750 | 0.418670  |
| C  | 1.514051  | -4.095746 | -0.605678 |
| C  | -1.544654 | -1.528459 | -1.262988 |
| C  | -0.864401 | -1.174310 | -2.404103 |
| C  | -2.886429 | -0.967728 | -1.210860 |
| S  | -1.846773 | -0.184923 | -3.420523 |
| C  | -3.183127 | -0.208684 | -2.325272 |
| C  | 0.539787  | -1.505462 | -2.801722 |
| C  | -4.393774 | 0.596619  | -2.674780 |
| P  | -4.034757 | -1.403049 | 0.158519  |
| C  | -4.872278 | 2.559471  | 1.136058  |
| C  | -4.318447 | 1.447443  | 0.495734  |
| C  | -5.806701 | 2.389406  | 2.155578  |
| C  | -4.699435 | 0.154231  | 0.863542  |
| C  | -6.182840 | 1.101676  | 2.543151  |
| C  | -5.625359 | -0.004578 | 1.908646  |
| C  | -7.776308 | -2.074116 | -1.575605 |
| C  | -6.736358 | -1.467742 | -0.868879 |
| C  | -7.576883 | -3.297387 | -2.213325 |
| C  | -5.478002 | -2.076846 | -0.788142 |
| C  | -6.328753 | -3.916761 | -2.135244 |
| C  | -5.294051 | -3.315185 | -1.422395 |
| H  | 0.095676  | 2.089329  | 2.163176  |
| H  | -1.530359 | 3.339720  | 3.547773  |
| H  | -3.445429 | 2.146111  | 4.607366  |
| H  | -2.091133 | -1.558783 | 2.889497  |
| H  | -3.707261 | -0.306599 | 4.283534  |
| H  | 4.635562  | -2.828107 | 2.618175  |
| H  | 2.704534  | -2.363331 | 1.162003  |
| H  | 4.745247  | -1.837834 | 4.908105  |
| H  | 2.878083  | -0.402164 | 5.719482  |
| H  | 0.939493  | 0.065783  | 4.266421  |
| H  | 0.819266  | -3.667836 | 2.210052  |
| H  | -1.846060 | -3.482562 | 2.626866  |
| H  | -1.185153 | -5.116058 | 2.537118  |
| H  | -3.036664 | -3.864378 | 0.590405  |
| H  | -2.375324 | -5.505398 | 0.520355  |
| H  | -1.562222 | -5.605160 | -1.842854 |
| H  | -0.650567 | -4.263658 | -2.574320 |
| H  | -2.373851 | -4.068598 | -2.217843 |
| H  | 1.222428  | -6.225041 | 1.052019  |
| H  | 0.495949  | -6.525261 | -0.537624 |
| H  | -0.531152 | -6.438085 | 0.902109  |
| H  | 2.413230  | -4.432683 | -0.066153 |
| H  | 1.606678  | -3.016069 | -0.768985 |
| H  | 1.528074  | -4.587777 | -1.590871 |
| H  | 0.669052  | -2.578993 | -3.003492 |
| H  | 1.231961  | -1.229261 | -1.992379 |
| H  | 0.847269  | -0.956470 | -3.702674 |
| H  | -4.157905 | 1.670302  | -2.595208 |
| H  | -5.226668 | 0.378246  | -1.998223 |
| H  | -4.726871 | 0.390943  | -3.703332 |
| H  | -4.588663 | 3.558271  | 0.791745  |
| H  | -3.600609 | 1.619725  | -0.307767 |
| H  | -6.246175 | 3.260969  | 2.646982  |
| H  | -6.911237 | 0.957846  | 3.345084  |
| H  | -5.918163 | -1.010311 | 2.226565  |
| H  | -8.748649 | -1.578766 | -1.631828 |
| H  | -6.912054 | -0.504595 | -0.384783 |
| H  | -8.392378 | -3.769091 | -2.766650 |
| H  | -6.160649 | -4.878312 | -2.626340 |
| H  | -4.326390 | -3.819410 | -1.360184 |
| Cu | 1.275980  | 0.657380  | -0.277946 |
| H  | 3.649389  | 0.570546  | -2.687059 |
| H  | 3.347514  | -1.102795 | -2.221648 |
| H  | 3.308152  | -0.598284 | 0.151040  |
| H  | -0.913312 | 5.772892  | 1.845337  |
| H  | -2.678991 | 5.919941  | 1.586412  |
| H  | -1.538606 | 6.754184  | 0.491453  |
| C  | -0.488325 | 5.429660  | -2.486970 |
| H  | -0.228326 | 6.200177  | -3.226913 |
| H  | -0.384794 | 4.437084  | -2.956497 |
| H  | 0.227845  | 5.496407  | -1.649647 |

142

Figure 1\_ts(AS)\_major\_03 / electronic energy: -5826.79145442 a.u. / lowest freq: -196.64 cm<sup>-1</sup>

|   |           |           |          |
|---|-----------|-----------|----------|
| P | 0.332795  | -0.761161 | 1.750044 |
| C | -0.106823 | 0.991213  | 3.842466 |
| C | -0.449210 | 1.380894  | 5.135974 |
| C | -0.164575 | -0.356205 | 3.463910 |
| C | -0.867977 | 0.425562  | 6.060922 |
| C | -0.597125 | -1.307311 | 4.397060 |
| C | -0.945973 | -0.917213 | 5.688407 |
| C | 3.476432  | -3.186375 | 2.886924 |
| C | 2.244757  | -2.535459 | 2.871821 |
| C | 1.965509  | -1.583113 | 1.884926 |
| C | 4.432929  | -2.904237 | 1.910552 |
| C | 4.159855  | -1.956821 | 0.925535 |
| C | 2.934301  | -1.294609 | 0.921060 |
| C | -2.240488 | -2.194804 | 1.570610 |

|   |           |           |           |
|---|-----------|-----------|-----------|
| C | -0.755772 | -2.120627 | 1.243579  |
| C | -0.483116 | -3.142571 | 0.402971  |
| C | -2.965732 | -1.798212 | 0.252401  |
| C | -2.664361 | -2.996515 | -0.669137 |
| C | -1.793491 | -3.934713 | 0.219286  |
| C | -1.688191 | -5.346273 | -0.319622 |
| C | -2.460977 | -3.731895 | 1.621360  |
| C | -3.933512 | -4.148560 | 1.693372  |
| C | -1.743110 | -4.439954 | 2.772643  |
| C | 0.716937  | -3.455136 | -0.413519 |
| C | 1.498567  | -4.560270 | -0.190596 |
| C | 1.085747  | -2.741375 | -1.630945 |
| S | 2.647326  | -4.766806 | -1.466802 |
| C | 2.091477  | -3.373786 | -2.329969 |
| C | 1.476716  | -5.523043 | 0.953415  |
| C | 2.706926  | -3.073806 | -3.663226 |
| P | 0.310651  | -1.118970 | -1.965270 |
| C | 3.910668  | 0.738180  | -2.900962 |
| C | 2.985989  | -0.206275 | -2.456807 |
| C | 3.485888  | 1.873871  | -3.588334 |
| C | 1.615793  | -0.045795 | -2.707249 |
| C | 2.124531  | 2.052015  | -3.835072 |
| C | 1.201821  | 1.101867  | -3.401415 |
| C | -2.947809 | -0.704326 | -4.407273 |
| C | -1.976220 | -0.543719 | -3.420578 |
| C | -2.835488 | -1.743561 | -5.329810 |
| C | -0.868158 | -1.400917 | -3.353953 |
| C | -1.751987 | -2.620140 | -5.256194 |
| C | -0.775108 | -2.451972 | -4.275174 |
| H | 0.195456  | 1.745631  | 3.109806  |
| H | -0.395501 | 2.434954  | 5.416713  |
| H | -1.141053 | 0.727832  | 7.074611  |
| H | -0.676022 | -2.358239 | 4.115102  |
| H | -1.283607 | -1.666819 | 6.407480  |
| H | 3.688046  | -3.924342 | 3.663901  |
| H | 1.504764  | -2.777884 | 3.636682  |
| H | 5.395294  | -3.420732 | 1.922009  |
| H | 4.904773  | -1.724553 | 0.161274  |
| H | 2.723245  | -0.549285 | 0.154331  |
| H | -2.564816 | -1.630344 | 2.455109  |
| H | -2.584181 | -0.851509 | -0.147856 |
| H | -4.042109 | -1.657803 | 0.419459  |
| H | -2.130411 | -2.717933 | -1.585438 |
| H | -3.579410 | -3.517453 | -0.987150 |
| H | -2.692384 | -5.782965 | -0.435979 |
| H | -1.110578 | -6.005501 | 0.343337  |
| H | -1.205945 | -5.357105 | -1.309510 |
| H | -4.374102 | -3.802521 | 2.641970  |
| H | -4.021696 | -5.246316 | 1.674271  |
| H | -4.555625 | -3.755653 | 0.879919  |
| H | -2.232164 | -4.203361 | 3.730825  |
| H | -0.683737 | -4.166543 | 2.857694  |
| H | -1.798760 | -5.532570 | 2.644588  |
| H | 0.731555  | -5.211869 | 1.695226  |
| H | 2.453976  | -5.561524 | 1.458115  |
| H | 1.232345  | -6.545734 | 0.625613  |
| H | 3.778080  | -2.833583 | -3.576973 |
| H | 2.210407  | -2.226219 | -4.149551 |
| H | 2.619623  | -3.944936 | -4.331281 |
| H | 4.972743  | 0.584500  | -2.701959 |
| H | 3.345360  | -1.081791 | -1.915231 |
| H | 4.211351  | 2.615329  | -3.929792 |
| H | 1.772936  | 2.938121  | -4.368817 |
| H | 0.141482  | 1.266468  | -3.607161 |
| H | -3.801332 | -0.023099 | -4.441461 |
| H | -2.098024 | 0.244635  | -2.674278 |
| H | -3.598950 | -1.879113 | -6.099540 |
| H | -1.666933 | -3.444374 | -5.968320 |
| H | 0.052884  | -3.160915 | -4.220825 |
| C | 1.062273  | 2.963922  | -0.122381 |
| C | 2.233306  | 2.210687  | 0.179114  |
| C | 2.674012  | 2.021552  | 1.474426  |
| O | 4.327982  | 3.473717  | 1.927726  |
| P | 5.624242  | 3.329910  | 1.155451  |
| O | 6.963052  | 3.428640  | 1.803199  |
| O | 5.467421  | 1.885618  | 0.359431  |
| O | 5.620661  | 4.389709  | -0.104352 |
| C | 6.545107  | 1.430938  | -0.417394 |
| H | 0.811867  | 3.161376  | -1.167201 |
| H | 0.709319  | 3.718464  | 0.590228  |
| H | 2.770560  | 1.707918  | -0.629365 |
| H | 2.174814  | 2.503991  | 2.315532  |
| H | 3.431314  | 1.274881  | 1.699285  |
| B | -3.942427 | 1.722144  | 0.906391  |
| O | -4.872207 | 2.389905  | 1.653391  |
| O | -4.466576 | 1.214033  | -0.251208 |
| C | -6.162285 | 2.190879  | 1.040181  |
| C | -5.772696 | 1.788102  | -0.432172 |
| C | -6.966379 | 3.475352  | 1.155746  |
| C | -6.854809 | 1.064780  | 1.804694  |
| C | -5.604027 | 2.989650  | -1.361661 |
| C | -6.685299 | 0.755511  | -1.073649 |
| H | -4.929399 | 3.744140  | -0.929530 |
| H | -6.568686 | 3.466644  | -1.587006 |
| H | -5.159756 | 2.647530  | -2.307786 |
| H | -6.710784 | -0.181985 | -0.502931 |
| H | -6.324071 | 0.523902  | -2.086759 |

|    |           |          |           |
|----|-----------|----------|-----------|
| H  | -7.711208 | 1.144037 | -1.159662 |
| H  | -6.294355 | 0.120798 | 1.730301  |
| H  | -7.875278 | 0.894101 | 1.432540  |
| H  | -6.918476 | 1.337317 | 2.868469  |
| H  | -7.924609 | 3.381936 | 0.622754  |
| H  | -6.419403 | 4.335462 | 0.748300  |
| H  | -7.185703 | 3.681983 | 2.213862  |
| C  | -1.792019 | 3.200486 | -2.013597 |
| C  | -2.067927 | 4.400511 | -2.662548 |
| C  | -1.799853 | 3.098807 | -0.610773 |
| C  | -2.365683 | 5.548845 | -1.925500 |
| C  | -2.094627 | 4.268079 | 0.112730  |
| C  | -2.375267 | 5.472277 | -0.533465 |
| C  | -1.530767 | 1.798677 | 0.066425  |
| C  | -2.423222 | 1.565378 | 1.292229  |
| H  | -2.604162 | 6.360911 | 0.060782  |
| H  | -2.108335 | 4.241284 | 1.204808  |
| H  | -2.586483 | 6.491483 | -2.431505 |
| H  | -2.059257 | 4.437758 | -3.755130 |
| H  | -1.573808 | 2.309630 | -2.607233 |
| Cu | 0.354455  | 1.255792 | 0.566153  |
| H  | -2.183451 | 2.243288 | 2.126783  |
| H  | -2.279018 | 0.552377 | 1.698443  |
| H  | -1.668311 | 0.985420 | -0.662344 |
| H  | 6.389366  | 0.363867 | -0.636763 |
| H  | 7.501740  | 1.543440 | 0.119025  |
| H  | 6.622203  | 1.980682 | -1.372708 |
| C  | 4.439277  | 4.585777 | -0.837907 |
| H  | 4.611652  | 5.406405 | -1.550974 |
| H  | 3.593563  | 4.856096 | -0.183221 |
| H  | 4.156396  | 3.685197 | -1.411452 |

142

Figure 1\_ts(AS)\_major\_04 / electronic energy: -5826.79527463 a.u. / lowest freq: -325.32 cm-1

|   |           |           |           |
|---|-----------|-----------|-----------|
| C | -1.351100 | -2.038180 | -1.771235 |
| C | -0.395605 | -2.535792 | -0.858146 |
| C | 0.882880  | -1.985633 | -0.739384 |
| O | 2.269638  | -3.166418 | -1.718520 |
| P | 2.607855  | -4.540081 | -1.136749 |
| O | 4.016428  | -4.968914 | -0.905151 |
| O | 1.727266  | -4.604727 | 0.251022  |
| O | 1.889297  | -5.684405 | -2.055224 |
| C | 1.944538  | -5.664762 | 1.153437  |
| H | -2.304519 | -2.555095 | -1.892617 |
| H | -1.015555 | -1.440924 | -2.628153 |
| H | -0.683954 | -3.325994 | -0.158358 |
| H | 1.193601  | -1.179049 | -1.397633 |
| H | 1.456122  | -2.143883 | 0.169242  |
| B | -5.375458 | 0.472050  | -1.672399 |
| O | -6.387059 | -0.181664 | -2.319188 |
| O | -5.840896 | 1.350563  | -0.727729 |
| C | -7.640775 | 0.366215  | -1.865274 |
| C | -7.232175 | 1.054254  | -0.508628 |
| C | -8.649127 | -0.762875 | -1.722004 |
| C | -8.107458 | 1.360883  | -2.925503 |
| C | -7.299338 | 0.104318  | 0.687654  |
| C | -7.976938 | 2.341826  | -0.197649 |
| H | -6.781157 | -0.844039 | 0.481043  |
| H | -8.338756 | -0.117334 | 0.969827  |
| H | -6.800211 | 0.575739  | 1.546983  |
| H | -7.816654 | 3.104968  | -0.970525 |
| H | -7.625087 | 2.751679  | 0.760946  |
| H | -9.057334 | 2.153183  | -0.108615 |
| H | -7.391129 | 2.187550  | -3.044494 |
| H | -9.091772 | 1.783904  | -2.678747 |
| H | -8.189912 | 0.843145  | -3.892490 |
| H | -9.586036 | -0.392246 | -1.279521 |
| H | -8.260392 | -1.574979 | -1.093843 |
| H | -8.882561 | -1.182813 | -2.711586 |
| C | -3.857315 | -1.649106 | 1.481122  |
| C | -4.445941 | -2.752201 | 2.091661  |
| C | -3.906153 | -1.460220 | 0.083715  |
| C | -5.114063 | -3.712270 | 1.327663  |
| C | -4.585198 | -2.440264 | -0.666915 |
| C | -5.180193 | -3.543740 | -0.054897 |
| C | -3.252498 | -0.274626 | -0.538580 |
| C | -3.838348 | 0.198334  | -1.873354 |
| H | -5.706715 | -4.278236 | -0.670320 |
| H | -4.675763 | -2.329951 | -1.749187 |
| H | -5.581215 | -4.576765 | 1.805042  |
| H | -4.389277 | -2.857851 | 3.178390  |
| H | -3.357417 | -0.901589 | 2.100345  |
| P | -0.361056 | 0.601678  | 1.402258  |
| C | 1.962365  | 0.433323  | 3.025113  |
| C | 2.887524  | -0.268508 | 3.796980  |
| C | 0.918364  | -0.245750 | 2.392694  |
| C | 2.777895  | -1.650212 | 3.939597  |
| C | 0.805256  | -1.634282 | 2.550403  |
| C | 1.731891  | -2.333600 | 3.318169  |
| C | -3.823514 | 2.013720  | 3.082677  |
| C | -2.743061 | 1.799575  | 2.232119  |
| C | -1.670903 | 0.985873  | 2.627422  |
| C | -3.852220 | 1.410489  | 4.340919  |
| C | -2.786908 | 0.608679  | 4.745815  |
| C | -1.699616 | 0.397699  | 3.896226  |
| C | -0.077572 | 3.577529  | 1.519621  |
| C | 0.233684  | 2.230543  | 0.870220  |
| C | 0.924445  | 2.490253  | -0.260763 |

|    |           |           |           |
|----|-----------|-----------|-----------|
| C  | 1.272289  | 4.148490  | 2.029041  |
| C  | 2.030971  | 4.449354  | 0.719865  |
| C  | 1.024668  | 4.018968  | -0.392031 |
| C  | 1.345248  | 4.559357  | -1.770361 |
| C  | -0.341093 | 4.449403  | 0.260209  |
| C  | -0.465129 | 5.951517  | 0.535101  |
| C  | -1.592417 | 4.042384  | -0.521694 |
| C  | 1.522318  | 1.562491  | -1.253036 |
| C  | 0.853071  | 1.226962  | -2.406177 |
| C  | 2.869091  | 1.013602  | -1.204334 |
| S  | 1.850936  | 0.268915  | -3.436860 |
| C  | 3.179795  | 0.281046  | -2.332523 |
| C  | -0.555225 | 1.543182  | -2.800668 |
| C  | 4.400016  | -0.505473 | -2.691631 |
| P  | 4.008151  | 1.439530  | 0.175727  |
| C  | 4.919915  | -2.526549 | 1.072945  |
| C  | 4.339122  | -1.412726 | 0.459983  |
| C  | 5.859070  | -2.358432 | 2.088393  |
| C  | 4.699670  | -0.119821 | 0.849632  |
| C  | 6.212829  | -1.071839 | 2.499860  |
| C  | 5.630175  | 0.035760  | 1.891156  |
| C  | 7.737774  | 2.198333  | -1.548355 |
| C  | 6.707565  | 1.564896  | -0.851300 |
| C  | 7.519641  | 3.429042  | -2.165162 |
| C  | 5.440341  | 2.153543  | -0.758821 |
| C  | 6.262349  | 4.028159  | -2.075501 |
| C  | 5.237129  | 3.399315  | -1.372399 |
| H  | 2.065306  | 1.512159  | 2.907225  |
| H  | 3.705840  | 0.268731  | 4.279904  |
| H  | 3.512375  | -2.198699 | 4.533229  |
| H  | -0.012806 | -2.174142 | 2.065815  |
| H  | 1.642123  | -3.416496 | 3.424297  |
| H  | -4.650272 | 2.647425  | 2.754260  |
| H  | -2.738266 | 2.272932  | 1.248815  |
| H  | -4.703706 | 1.569036  | 5.006490  |
| H  | -2.797809 | 0.138315  | 5.731498  |
| H  | -0.878008 | -0.239061 | 4.230046  |
| H  | -0.869874 | 3.571561  | 2.277020  |
| H  | 1.801359  | 3.436428  | 2.675091  |
| H  | 1.102434  | 5.056017  | 2.625830  |
| H  | 2.970530  | 3.889459  | 0.641465  |
| H  | 2.273763  | 5.516763  | 0.612967  |
| H  | 1.456971  | 5.654026  | -1.737700 |
| H  | 0.556061  | 4.321967  | -2.498865 |
| H  | 2.284369  | 4.138015  | -2.160110 |
| H  | -1.330898 | 6.142806  | 1.188983  |
| H  | -0.641694 | 6.494216  | -0.406960 |
| H  | 0.414029  | 6.402362  | 1.011448  |
| H  | -2.495002 | 4.355934  | 0.026294  |
| H  | -1.664991 | 2.962454  | -0.695938 |
| H  | -1.621556 | 4.545290  | -1.501063 |
| H  | -0.708126 | 2.620769  | -2.958326 |
| H  | -1.245900 | 1.217706  | -2.008525 |
| H  | -0.843899 | 1.025209  | -3.725808 |
| H  | 4.174155  | -1.582845 | -2.635423 |
| H  | 5.227578  | -0.293027 | -2.006730 |
| H  | 4.736385  | -0.276353 | -3.714149 |
| H  | 4.654624  | -3.522864 | 0.706989  |
| H  | 3.617736  | -1.579857 | -0.341757 |
| H  | 6.319082  | -3.231051 | 2.558758  |
| H  | 6.944151  | -0.930051 | 3.299495  |
| H  | 5.906837  | 1.040377  | 2.226455  |
| H  | 8.717030  | 1.717970  | -1.613920 |
| H  | 6.898168  | 0.596488  | -0.383775 |
| H  | 8.327407  | 3.921979  | -2.711314 |
| H  | 6.079508  | 4.994940  | -2.550828 |
| H  | 4.261814  | 3.887687  | -1.301961 |
| Cu | -1.282472 | -0.689081 | -0.308949 |
| H  | -3.666246 | -0.516322 | -2.694532 |
| H  | -3.347658 | 1.138185  | -2.174938 |
| H  | -3.309717 | 0.552370  | 0.180850  |
| H  | 1.149562  | -5.629987 | 1.912216  |
| H  | 2.920936  | -5.575836 | 1.656643  |
| H  | 1.897760  | -6.645896 | 0.651161  |
| C  | 0.551516  | -5.515880 | -2.461729 |
| H  | 0.322531  | -6.294912 | -3.203163 |
| H  | 0.391773  | -4.527724 | -2.924460 |
| H  | -0.148845 | -5.625238 | -1.615795 |

142

Figure 1\_ts(AS)\_major\_05 / electronic energy: -5826.77845892 a.u. / lowest freq: -202.70 cm-1

|   |           |           |          |
|---|-----------|-----------|----------|
| C | 0.582252  | 0.907119  | 2.589417 |
| C | 1.863737  | 1.256630  | 2.108384 |
| C | 2.580355  | 0.459023  | 1.220636 |
| O | 4.147139  | -0.624533 | 2.215802 |
| P | 5.347902  | 0.157059  | 2.733074 |
| O | 6.748296  | -0.277024 | 2.478581 |
| O | 5.080964  | 1.688510  | 2.179342 |
| O | 5.178368  | 0.360679  | 4.354005 |
| C | 6.080294  | 2.663613  | 2.343841 |
| H | 0.101045  | 1.546591  | 3.330402 |
| H | 0.266101  | -0.140566 | 2.580551 |
| H | 2.283467  | 2.235752  | 2.357874 |
| H | 2.197371  | -0.507665 | 0.891162 |
| H | 3.407145  | 0.892737  | 0.669950 |
| B | -3.917760 | 0.208000  | 1.449028 |
| O | -4.764324 | -0.305610 | 2.394355 |
| O | -4.591359 | 0.734806  | 0.378458 |



|   |           |           |           |
|---|-----------|-----------|-----------|
| C | -6.101592 | -0.291959 | 1.858370  |
| C | -5.990144 | 0.776417  | 0.703074  |
| C | -7.074833 | 0.072385  | 2.968379  |
| C | -6.395129 | -1.702373 | 1.351272  |
| C | -6.296369 | 2.199354  | 1.167114  |
| C | -6.796067 | 0.444495  | -0.543006 |
| H | -5.717698 | 2.466057  | 2.064325  |
| H | -7.365909 | 2.334562  | 1.384434  |
| H | -6.017255 | 2.902152  | 0.368879  |
| H | -6.458509 | -0.493704 | -1.002804 |
| H | -6.680947 | 1.246711  | -1.287285 |
| H | -7.866797 | 0.354753  | -0.305600 |
| H | -5.699438 | -1.991841 | 0.550883  |
| H | -7.422452 | -1.792438 | 0.970226  |
| H | -6.273404 | -2.414770 | 2.180652  |
| H | -8.096691 | 0.169923  | 2.571721  |
| H | -6.798419 | 1.013174  | 3.461638  |
| H | -7.080746 | -0.720556 | 3.730753  |
| C | -2.912868 | 3.724528  | 0.798284  |
| C | -3.446979 | 4.880008  | 1.365502  |
| C | -2.269064 | 2.742188  | 1.574055  |
| C | -3.375919 | 5.085666  | 2.743065  |
| C | -2.240977 | 2.957133  | 2.965107  |
| C | -2.778738 | 4.107633  | 3.539718  |
| C | -1.748006 | 1.486529  | 0.944229  |
| C | -2.350946 | 0.227607  | 1.575980  |
| H | -2.734162 | 4.238634  | 4.624134  |
| H | -1.805900 | 2.200413  | 3.621160  |
| H | -3.797219 | 5.987545  | 3.193354  |
| H | -3.942412 | 5.615231  | 0.725620  |
| H | -3.034069 | 3.555560  | -0.273703 |
| P | 1.089653  | 1.624124  | -1.496190 |
| C | 3.939222  | 1.507788  | -1.630920 |
| C | 5.212134  | 2.061721  | -1.501247 |
| C | 2.798074  | 2.306061  | -1.499391 |
| C | 5.362352  | 3.421675  | -1.239593 |
| C | 2.957495  | 3.672810  | -1.229150 |
| C | 4.230276  | 4.225231  | -1.101549 |
| C | -1.409034 | 4.701946  | -2.523268 |
| C | -0.744441 | 3.685722  | -1.835985 |
| C | 0.227475  | 2.913768  | -2.472709 |
| C | -1.099168 | 4.951639  | -3.857994 |
| C | -0.109053 | 4.199384  | -4.495702 |
| C | 0.558675  | 3.191322  | -3.806090 |
| C | 1.977822  | -0.111124 | -3.759521 |
| C | 1.076283  | 0.152497  | -2.555133 |
| C | 0.191690  | -0.867714 | -2.503224 |
| C | 2.822991  | -1.369439 | -3.389664 |
| C | 1.781246  | -2.506582 | -3.410272 |
| C | 0.456930  | -1.763997 | -3.738316 |
| C | -0.689966 | -2.650842 | -4.178888 |
| C | 0.961191  | -0.700297 | -4.775730 |
| C | 1.604033  | -1.285585 | -6.037996 |
| C | -0.123462 | 0.267941  | -5.247449 |
| C | -0.917880 | -1.269990 | -1.598926 |
| C | -2.204986 | -0.851670 | -1.838710 |
| C | -0.861963 | -2.437514 | -0.724560 |
| S | -3.341912 | -1.943279 | -1.131473 |
| C | -2.113425 | -2.941082 | -0.439361 |
| C | -2.693058 | 0.312722  | -2.639340 |
| C | -2.534379 | -4.169969 | 0.308711  |
| P | 0.739841  | -2.986574 | -0.015113 |
| C | -0.532211 | -2.426296 | 3.934614  |
| C | -0.577371 | -2.636131 | 2.557370  |
| C | 0.694859  | -2.299545 | 4.588411  |
| C | 0.604646  | -2.724135 | 1.807855  |
| C | 1.876459  | -2.375174 | 3.854411  |
| C | 1.829389  | -2.582594 | 2.476034  |
| C | 1.124124  | -7.049265 | 0.710592  |
| C | 1.106858  | -5.664106 | 0.877994  |
| C | 0.711103  | -7.619758 | -0.492444 |
| C | 0.671455  | -4.825932 | -0.156867 |
| C | 0.285678  | -6.792761 | -1.532711 |
| C | 0.270977  | -5.409406 | -1.368110 |
| H | 3.845540  | 0.437541  | -1.807724 |
| H | 6.089384  | 1.418324  | -1.595639 |
| H | 6.359435  | 3.854725  | -1.133268 |
| H | 2.083443  | 4.319333  | -1.115958 |
| H | 4.336555  | 5.292115  | -0.892299 |
| H | -2.166140 | 5.298517  | -2.008797 |
| H | -0.970229 | 3.498069  | -0.786843 |
| H | -1.619130 | 5.743268  | -4.402639 |
| H | 0.147414  | 4.403785  | -5.537663 |
| H | 1.347059  | 2.627799  | -4.307895 |
| H | 2.575252  | 0.742832  | -4.104494 |
| H | 3.289748  | -1.273308 | -2.401010 |
| H | 3.631212  | -1.527276 | -4.117739 |
| H | 1.721549  | -3.038090 | -2.452950 |
| H | 1.993090  | -3.257845 | -4.184800 |
| H | -0.402435 | -3.234240 | -5.067462 |
| H | -1.584722 | -2.062378 | -4.432435 |
| H | -0.982821 | -3.361053 | -3.392506 |
| H | 2.043688  | -0.474194 | -6.639449 |
| H | 0.840557  | -1.775212 | -6.662847 |
| H | 2.397201  | -2.019045 | -5.850858 |
| H | 0.308359  | 1.039233  | -5.903477 |
| H | -0.638607 | 0.777548  | -4.426556 |

|    |           |           |           |
|----|-----------|-----------|-----------|
| H  | -0.880151 | -0.270405 | -5.839752 |
| H  | -2.977305 | 0.025824  | -3.664926 |
| H  | -1.913629 | 1.083517  | -2.703172 |
| H  | -3.571821 | 0.763872  | -2.154787 |
| H  | -3.323777 | -3.949610 | 1.043404  |
| H  | -1.690771 | -4.629592 | 0.835217  |
| H  | -2.934254 | -4.921230 | -0.391536 |
| H  | -1.466294 | -2.349490 | 4.496299  |
| H  | -1.549566 | -2.703179 | 2.072933  |
| H  | 0.727042  | -2.125488 | 5.666699  |
| H  | 2.846724  | -2.242524 | 4.337062  |
| H  | 2.769909  | -2.582066 | 1.920910  |
| H  | 1.460987  | -7.686225 | 1.532105  |
| H  | 1.429629  | -5.239359 | 1.831273  |
| H  | 0.721869  | -8.704611 | -0.620723 |
| H  | -0.040316 | -7.226806 | -2.481009 |
| H  | -0.070612 | -4.777789 | -2.190886 |
| Cu | 0.258476  | 1.381597  | 0.680076  |
| H  | -2.071629 | 0.113947  | 2.635670  |
| H  | -1.955464 | -0.670642 | 1.075579  |
| H  | -2.032122 | 1.503281  | -0.119558 |
| H  | 5.695957  | 3.612576  | 1.941902  |
| H  | 7.003698  | 2.394645  | 1.805049  |
| H  | 6.332247  | 2.814336  | 3.408560  |
| C  | 3.952828  | 0.811217  | 4.873628  |
| H  | 3.958461  | 0.639827  | 5.960635  |
| H  | 3.097353  | 0.268493  | 4.437097  |
| H  | 3.806062  | 1.891177  | 4.694904  |

142

Figure 1\_ts(AS)\_major\_06 / electronic energy: -5826.78081695 a.u. / lowest freq: -282.89 cm<sup>-1</sup>

|   |           |           |           |
|---|-----------|-----------|-----------|
| C | -0.145356 | -0.154924 | 2.972086  |
| C | 0.810654  | 0.893286  | 2.947781  |
| C | 1.842055  | 0.955715  | 2.008715  |
| O | 3.577700  | 0.354908  | 2.963525  |
| P | 4.870598  | 0.166233  | 2.178748  |
| O | 5.299488  | -1.166792 | 1.660604  |
| O | 4.779665  | 1.275886  | 0.967271  |
| O | 6.100742  | 0.759384  | 3.081160  |
| C | 5.815946  | 1.302262  | 0.011669  |
| H | -0.880064 | -0.193627 | 3.779381  |
| H | 0.096233  | -1.112849 | 2.502261  |
| H | 0.699424  | 1.721552  | 3.655531  |
| H | 1.950340  | 0.175487  | 1.251760  |
| H | 2.357277  | 1.893658  | 1.814195  |
| B | -3.817456 | -1.819851 | 0.317417  |
| O | -4.581307 | -2.886908 | 0.702988  |
| O | -4.387636 | -1.117287 | -0.713421 |
| C | -5.667763 | -3.024023 | -0.235305 |
| C | -5.736382 | -1.587697 | -0.879283 |
| C | -6.920504 | -3.440144 | 0.518107  |
| C | -5.263986 | -4.110139 | -1.229449 |
| C | -6.635084 | -0.623833 | -0.106498 |
| C | -6.093351 | -1.569207 | -2.356567 |
| H | -6.397801 | -0.623166 | 0.968084  |
| H | -7.699304 | -0.870293 | -0.230839 |
| H | -6.470791 | 0.395147  | -0.486946 |
| H | -5.358332 | -2.117716 | -2.960165 |
| H | -6.125460 | -0.531036 | -2.719576 |
| H | -7.085648 | -2.015910 | -2.520847 |
| H | -4.356309 | -3.829698 | -1.783897 |
| H | -6.065813 | -4.317123 | -1.952733 |
| H | -5.050071 | -5.038576 | -0.679767 |
| H | -7.786892 | -3.474362 | -0.159546 |
| H | -7.146847 | -2.751888 | 1.342806  |
| H | -6.782079 | -4.444827 | 0.944282  |
| C | -3.192794 | 1.736761  | 3.149779  |
| C | -3.918561 | 2.101190  | 4.278580  |
| C | -3.243726 | 0.429482  | 2.621147  |
| C | -4.716620 | 1.161255  | 4.937528  |
| C | -4.042984 | -0.501931 | 3.306837  |
| C | -4.768605 | -0.140396 | 4.445273  |
| C | -2.461442 | 0.084297  | 1.396188  |
| C | -2.460680 | -1.382846 | 0.973500  |
| H | -5.381739 | -0.891571 | 4.950398  |
| H | -4.119301 | -1.528498 | 2.943237  |
| H | -5.281757 | 1.441214  | 5.829649  |
| H | -3.849996 | 3.124054  | 4.658303  |
| H | -2.540276 | 2.477824  | 2.675712  |
| P | -0.498263 | 2.435679  | -0.355431 |
| C | 0.726323  | 4.222565  | 1.432427  |
| C | 1.244431  | 5.448640  | 1.851764  |
| C | 0.198589  | 4.068676  | 0.146419  |
| C | 1.231043  | 6.542028  | 0.990017  |
| C | 0.162232  | 5.185828  | -0.702004 |
| C | 0.681225  | 6.408696  | -0.286352 |
| C | -4.427915 | 3.488937  | -0.939674 |
| C | -3.228749 | 3.058565  | -0.371997 |
| C | -2.065422 | 2.979018  | -1.145474 |
| C | -4.475269 | 3.851093  | -2.284763 |
| C | -3.314533 | 3.797859  | -3.057322 |
| C | -2.117572 | 3.367236  | -2.490149 |
| C | 1.614411  | 2.699760  | -2.392011 |
| C | 0.578794  | 1.827952  | -1.692095 |
| C | 0.784861  | 0.552576  | -2.103522 |
| C | 2.959177  | 2.354319  | -1.699984 |
| C | 3.214232  | 0.908113  | -2.184001 |
| C | 1.977262  | 0.597277  | -3.089664 |

|    |           |           |           |
|----|-----------|-----------|-----------|
| C  | 2.113588  | -0.574839 | -4.040881 |
| C  | 1.757670  | 1.993716  | -3.763355 |
| C  | 2.939959  | 2.499837  | -4.598401 |
| C  | 0.526296  | 2.068095  | -4.667227 |
| C  | 0.064263  | -0.734507 | -1.883301 |
| C  | -1.171354 | -0.951326 | -2.457292 |
| C  | 0.673107  | -1.980664 | -1.405070 |
| S  | -1.548387 | -2.637705 | -2.503480 |
| C  | -0.074579 | -3.090815 | -1.726587 |
| C  | -2.162695 | -0.003852 | -3.046914 |
| C  | 0.214179  | -4.550523 | -1.560420 |
| P  | 2.153558  | -1.962622 | -0.310243 |
| C  | 0.038918  | -3.889984 | 2.738661  |
| C  | 0.354485  | -3.363251 | 1.485058  |
| C  | 0.978840  | -3.862977 | 3.766551  |
| C  | 1.613626  | -2.804640 | 1.239208  |
| C  | 2.237993  | -3.308127 | 3.531564  |
| C  | 2.555502  | -2.780316 | 2.282159  |
| C  | 4.466594  | -5.339780 | -1.089139 |
| C  | 3.501087  | -4.492168 | -0.547948 |
| C  | 5.300126  | -4.892429 | -2.113821 |
| C  | 3.347252  | -3.182781 | -1.022470 |
| C  | 5.173112  | -3.584584 | -2.580382 |
| C  | 4.215536  | -2.734189 | -2.028704 |
| H  | 0.724439  | 3.379978  | 2.122160  |
| H  | 1.655722  | 5.545082  | 2.858977  |
| H  | 1.637662  | 7.502517  | 1.314767  |
| H  | -0.282000 | 5.111039  | -1.696235 |
| H  | 0.651445  | 7.264925  | -0.963982 |
| H  | -5.328966 | 3.535347  | -0.323918 |
| H  | -3.211639 | 2.790774  | 0.685048  |
| H  | -5.415845 | 4.181905  | -2.731130 |
| H  | -3.340341 | 4.089082  | -4.109807 |
| H  | -1.218099 | 3.324279  | -3.105528 |
| H  | 1.390361  | 3.771786  | -2.430112 |
| H  | 2.884832  | 2.422495  | -0.606032 |
| H  | 3.752033  | 3.047550  | -2.015185 |
| H  | 3.293761  | 0.201469  | -1.350145 |
| H  | 4.140459  | 0.825206  | -2.771854 |
| H  | 2.979925  | -0.432147 | -4.705358 |
| H  | 1.214984  | -0.679983 | -4.668717 |
| H  | 2.251024  | -1.528912 | -3.515466 |
| H  | 2.762362  | 3.546978  | -4.892100 |
| H  | 3.032861  | 1.914120  | -5.526201 |
| H  | 3.909285  | 2.462250  | -4.087238 |
| H  | 0.307303  | 3.115470  | -4.931245 |
| H  | -0.372563 | 1.634395  | -4.217909 |
| H  | 0.711117  | 1.531175  | -5.610400 |
| H  | -1.790023 | 1.020360  | -2.996489 |
| H  | -3.107571 | -0.046010 | -2.482449 |
| H  | -2.380892 | -0.242401 | -4.099677 |
| H  | 0.883756  | -4.740340 | -0.716360 |
| H  | 0.701999  | -4.946253 | -2.466001 |
| H  | -0.708571 | -5.126398 | -1.397767 |
| H  | -0.952981 | -4.315818 | 2.908946  |
| H  | -0.407708 | -3.370438 | 0.707571  |
| H  | 0.730619  | -4.269171 | 4.750141  |
| H  | 2.981401  | -3.272181 | 4.331507  |
| H  | 3.540270  | -2.328296 | 2.117910  |
| H  | 4.569735  | -6.356292 | -0.701782 |
| H  | 2.868872  | -4.860259 | 0.263195  |
| H  | 6.056683  | -5.557678 | -2.536783 |
| H  | 5.836098  | -3.214690 | -3.366146 |
| H  | 4.156371  | -1.702591 | -2.379209 |
| Cu | -0.649802 | 0.947576  | 1.405313  |
| H  | -2.183169 | -2.045870 | 1.807094  |
| H  | -1.687821 | -1.525856 | 0.200101  |
| H  | -2.853244 | 0.683483  | 0.559929  |
| H  | 5.614431  | 2.127790  | -0.684578 |
| H  | 5.869948  | 0.356868  | -0.551499 |
| H  | 6.797131  | 1.477537  | 0.486783  |
| C  | 5.950519  | 2.010974  | 3.709024  |
| H  | 6.899910  | 2.255618  | 4.207114  |
| H  | 5.147507  | 1.991381  | 4.464067  |
| H  | 5.722711  | 2.808180  | 2.980015  |

142

Figure 1\_pi-allyl\_major\_01 / electronic energy: -5826.81392270 a.u. / lowest freq: 20.43 cm<sup>-1</sup>

|   |           |          |           |
|---|-----------|----------|-----------|
| P | -0.073699 | 2.006942 | -0.786878 |
| C | 0.932353  | 2.738799 | -3.265460 |
| C | 1.191523  | 3.596536 | -4.333493 |
| C | 0.179411  | 3.175952 | -2.169340 |
| C | 0.690884  | 4.897217 | -4.318744 |
| C | -0.321943 | 4.484487 | -2.163339 |
| C | -0.068211 | 5.338917 | -3.233654 |
| C | 2.392440  | 4.276236 | 1.640595  |
| C | 1.528005  | 3.905694 | 0.610492  |
| C | 1.025460  | 2.601619 | 0.552275  |
| C | 2.760656  | 3.352742 | 2.619377  |
| C | 2.259616  | 2.052045 | 2.568211  |
| C | 1.401692  | 1.683470 | 1.536920  |
| C | -2.931365 | 2.639681 | -1.106187 |
| C | -1.752803 | 2.333717 | -0.189677 |
| C | -2.243948 | 2.222984 | 1.062164  |
| C | -3.777460 | 1.334806 | -1.136658 |
| C | -4.345602 | 1.261215 | 0.294398  |
| C | -3.752983 | 2.526802 | 0.984030  |
| C | -4.448612 | 2.903045 | 2.275380  |

|   |           |           |           |
|---|-----------|-----------|-----------|
| C | -3.789135 | 3.559886  | -0.193727 |
| C | -5.188527 | 3.852692  | -0.745733 |
| C | -3.151441 | 4.912199  | 0.129272  |
| C | -1.638347 | 1.742122  | 2.326938  |
| C | -1.333494 | 2.587636  | 3.362920  |
| C | -1.471363 | 0.337706  | 2.673867  |
| S | -0.892023 | 1.692102  | 4.773383  |
| C | -1.118808 | 0.163637  | 3.995589  |
| C | -1.271062 | 4.080968  | 3.374611  |
| C | -0.985394 | -1.082750 | 4.817369  |
| P | -1.625055 | -0.961065 | 1.385091  |
| C | 1.958043  | -2.714251 | 2.633420  |
| C | 0.914400  | -1.803833 | 2.467626  |
| C | 1.892659  | -3.974396 | 2.044199  |
| C | -0.219919 | -2.132139 | 1.711589  |
| C | 0.789232  | -4.298309 | 1.254649  |
| C | -0.248037 | -3.383964 | 1.073360  |
| C | -4.765865 | -3.616912 | 1.359524  |
| C | -3.603059 | -2.912458 | 1.047133  |
| C | -5.484686 | -3.318615 | 2.516835  |
| C | -3.124686 | -1.912759 | 1.909678  |
| C | -5.034024 | -2.304580 | 3.361389  |
| C | -3.863946 | -1.606616 | 3.060860  |
| H | 1.325547  | 1.719417  | -3.281834 |
| H | 1.785322  | 3.242404  | -5.178871 |
| H | 0.890121  | 5.570181  | -5.155937 |
| H | -0.915443 | 4.839597  | -1.319995 |
| H | -0.466761 | 6.355756  | -3.219592 |
| H | 2.786263  | 5.294563  | 1.673226  |
| H | 1.267592  | 4.638321  | -0.154744 |
| H | 3.444056  | 3.646937  | 3.419219  |
| H | 2.548054  | 1.316286  | 3.321735  |
| H | 1.023115  | 0.663652  | 1.493572  |
| H | -2.678118 | 3.038518  | -2.097224 |
| H | -3.158682 | 0.465858  | -1.376532 |
| H | -4.567610 | 1.395717  | -1.898405 |
| H | -4.056165 | 0.345782  | 0.825979  |
| H | -5.444709 | 1.300663  | 0.312351  |
| H | -5.515282 | 3.100725  | 2.086450  |
| H | -4.014939 | 3.802708  | 2.736718  |
| H | -4.389356 | 2.087076  | 3.012055  |
| H | -5.107301 | 4.417429  | -1.688265 |
| H | -5.755293 | 4.478486  | -0.038573 |
| H | -5.792373 | 2.960229  | -0.949863 |
| H | -3.162030 | 5.561630  | -0.760419 |
| H | -2.113156 | 4.831747  | 0.474591  |
| H | -3.726022 | 5.430478  | 0.913376  |
| H | -1.718413 | 4.488706  | 2.460512  |
| H | -0.225504 | 4.427453  | 3.415579  |
| H | -1.799771 | 4.511714  | 4.238475  |
| H | 0.027286  | -1.198658 | 5.233452  |
| H | -1.211562 | -1.975664 | 4.223255  |
| H | -1.689061 | -1.057656 | 5.664441  |
| H | 2.826741  | -2.427264 | 3.229683  |
| H | 0.987380  | -0.833462 | 2.958456  |
| H | 2.707774  | -4.690151 | 2.175270  |
| H | 0.738241  | -5.267789 | 0.753404  |
| H | -1.058130 | -3.636567 | 0.385709  |
| H | -5.116469 | -4.395483 | 0.677558  |
| H | -3.078299 | -3.124443 | 0.108001  |
| H | -6.400587 | -3.865579 | 2.754150  |
| H | -5.595030 | -2.051822 | 4.264702  |
| H | -3.535992 | -0.809943 | 3.730306  |
| C | 0.608457  | -1.768988 | -2.708482 |
| C | -0.159290 | -0.863180 | -3.500982 |
| C | -1.300490 | -0.311371 | -2.967420 |
| O | -1.717749 | -4.054778 | -4.036663 |
| P | -2.534336 | -3.671793 | -2.847377 |
| O | -1.915143 | -3.179522 | -1.557331 |
| O | -3.640472 | -2.557851 | -3.360707 |
| O | -3.528263 | -4.904596 | -2.386234 |
| C | -4.560712 | -2.035549 | -2.437605 |
| H | 1.543832  | -2.158730 | -3.105739 |
| H | 0.054126  | -2.418255 | -2.013854 |
| H | 0.284349  | -0.430706 | -4.404801 |
| H | -1.805660 | -0.841925 | -2.151687 |
| H | -1.823629 | 0.507354  | -3.466281 |
| B | 4.165394  | -1.939955 | 0.109235  |
| O | 5.197124  | -2.831033 | 0.000516  |
| O | 4.395940  | -0.988326 | 1.065923  |
| C | 6.133411  | -2.564676 | 1.063982  |
| C | 5.774359  | -1.083304 | 1.461457  |
| C | 7.547080  | -2.752874 | 0.536758  |
| C | 5.851800  | -3.571569 | 2.176596  |
| C | 6.539892  | -0.039717 | 0.648761  |
| C | 5.890896  | -0.776454 | 2.945675  |
| H | 6.469898  | -0.238813 | -0.431061 |
| H | 7.602316  | -0.003444 | 0.929996  |
| H | 6.099427  | 0.950620  | 0.835295  |
| H | 5.224728  | -1.407321 | 3.548753  |
| H | 5.621594  | 0.274452  | 3.129054  |
| H | 6.924070  | -0.926858 | 3.293296  |
| H | 4.843378  | -3.440157 | 2.594249  |
| H | 6.583404  | -3.485478 | 2.992880  |
| H | 5.917866  | -4.588468 | 1.762560  |
| H | 8.285848  | -2.444008 | 1.291492  |
| H | 7.719350  | -2.175296 | -0.380652 |

|    |           |           |           |
|----|-----------|-----------|-----------|
| H  | 7.721081  | -3.814469 | 0.306880  |
| C  | 3.680911  | 1.560601  | -1.318192 |
| C  | 4.454721  | 2.421796  | -2.093343 |
| C  | 3.206269  | 0.341910  | -1.833323 |
| C  | 4.785493  | 2.083271  | -3.405281 |
| C  | 3.570894  | 0.006198  | -3.149058 |
| C  | 4.345650  | 0.864791  | -3.925851 |
| C  | 2.344776  | -0.550325 | -0.995629 |
| C  | 2.875518  | -1.961047 | -0.792783 |
| H  | 4.605600  | 0.580927  | -4.948821 |
| H  | 3.233559  | -0.938450 | -3.580995 |
| H  | 5.388643  | 2.758704  | -4.016511 |
| H  | 4.805070  | 3.364059  | -1.664482 |
| H  | 3.442509  | 1.830380  | -0.288282 |
| Cu | 0.484424  | -0.089266 | -1.636044 |
| H  | 3.112009  | -2.471686 | -1.738888 |
| H  | 2.118314  | -2.587395 | -0.295283 |
| H  | 2.210358  | -0.092583 | -0.008685 |
| H  | -5.117716 | -1.223704 | -2.929693 |
| H  | -4.062811 | -1.627445 | -1.541865 |
| H  | -5.285689 | -2.799267 | -2.103087 |
| C  | -4.228319 | -5.602799 | -3.384667 |
| H  | -4.772118 | -6.431898 | -2.907407 |
| H  | -3.543621 | -6.016031 | -4.144353 |
| H  | -4.961400 | -4.956865 | -3.901224 |

142

Figure 1\_pi-allyl\_major\_02 / electronic energy: -5826.80177164 a.u. / lowest freq: 15.50 cm-1

|   |           |           |           |
|---|-----------|-----------|-----------|
| C | 0.093530  | 1.897507  | 2.580760  |
| C | 1.178549  | 2.673278  | 2.064492  |
| C | 2.276090  | 2.063877  | 1.507012  |
| O | 4.553634  | 0.148020  | 2.233954  |
| P | 5.816027  | 0.939768  | 2.020601  |
| O | 7.082968  | 0.333657  | 1.508294  |
| O | 5.377486  | 2.222294  | 1.063663  |
| O | 6.191872  | 1.736543  | 3.417314  |
| C | 6.378143  | 2.970810  | 0.427441  |
| H | -0.776387 | 2.409645  | 2.988655  |
| H | 0.308699  | 0.908601  | 3.005324  |
| H | 1.004451  | 3.741156  | 1.886752  |
| H | 2.595315  | 1.049356  | 1.778212  |
| H | 3.022057  | 2.631707  | 0.945697  |
| B | -4.059256 | 0.417125  | 1.558945  |
| O | -4.912652 | 0.308757  | 2.621488  |
| O | -4.718024 | 0.591041  | 0.373724  |
| C | -6.259063 | 0.231741  | 2.109474  |
| C | -6.103465 | 0.845516  | 0.665723  |
| C | -7.182994 | 1.012453  | 3.030466  |
| C | -6.650335 | -1.244022 | 2.099457  |
| C | -6.290939 | 2.361125  | 0.630171  |
| C | -6.967823 | 0.187718  | -0.397721 |
| H | -5.681540 | 2.861392  | 1.396516  |
| H | -7.343432 | 2.642641  | 0.777456  |
| H | -5.964428 | 2.738522  | -0.350133 |
| H | -6.739828 | -0.880287 | -0.510426 |
| H | -6.802044 | 0.677906  | -1.368657 |
| H | -8.034596 | 0.292326  | -0.148234 |
| H | -5.997913 | -1.829985 | 1.435928  |
| H | -7.692913 | -1.384989 | 1.780025  |
| H | -6.546130 | -1.648839 | 3.116997  |
| H | -8.196598 | 1.067382  | 2.605745  |
| H | -6.818320 | 2.033822  | 3.199898  |
| H | -7.250890 | 0.509414  | 4.006397  |
| C | -2.305198 | 3.558620  | -0.391843 |
| C | -2.790719 | 4.863655  | -0.395755 |
| C | -2.316036 | 2.773816  | 0.773922  |
| C | -3.307569 | 5.425918  | 0.772182  |
| C | -2.853009 | 3.353807  | 1.938352  |
| C | -3.338201 | 4.660512  | 1.937789  |
| C | -1.820799 | 1.367466  | 0.741282  |
| C | -2.489085 | 0.394974  | 1.697118  |
| H | -3.754181 | 5.080594  | 2.856955  |
| H | -2.915818 | 2.773339  | 2.861857  |
| H | -3.692476 | 6.448275  | 0.771604  |
| H | -2.771242 | 5.440863  | -1.323566 |
| H | -1.919655 | 3.129289  | -1.318395 |
| P | 0.951657  | 1.009190  | -1.501806 |
| C | 3.549445  | 0.171764  | -0.893622 |
| C | 4.914636  | 0.023306  | -1.129171 |
| C | 2.766673  | 0.949064  | -1.751559 |
| C | 5.505233  | 0.651492  | -2.222856 |
| C | 3.369027  | 1.594491  | -2.840454 |
| C | 4.733413  | 1.443299  | -3.074353 |
| C | 0.548841  | 4.987899  | -2.322365 |
| C | 0.951495  | 3.767671  | -1.788900 |
| C | 0.470817  | 2.566237  | -2.330240 |
| C | -0.343035 | 5.022410  | -3.396889 |
| C | -0.821608 | 3.831658  | -3.939238 |
| C | -0.413704 | 2.605790  | -3.409482 |
| C | 1.072261  | -0.651168 | -3.898823 |
| C | 0.384641  | -0.338100 | -2.571094 |
| C | -0.449688 | -1.363663 | -2.304788 |
| C | 2.069921  | -1.798347 | -3.571466 |
| C | 1.123011  | -2.972584 | -3.247821 |
| C | -0.303692 | -2.372030 | -3.466794 |
| C | -1.385627 | -3.421037 | -3.618337 |
| C | -0.044053 | -1.408433 | -4.669525 |
| C | 0.442519  | -2.096300 | -5.950214 |

|    |           |           |           |
|----|-----------|-----------|-----------|
| C  | -1.250554 | -0.556548 | -5.063705 |
| C  | -1.347668 | -1.723583 | -1.179947 |
| C  | -2.708322 | -1.567181 | -1.297823 |
| C  | -0.973105 | -2.597593 | -0.081123 |
| S  | -3.531952 | -2.570709 | -0.158991 |
| C  | -2.067113 | -3.179296 | 0.526001  |
| C  | -3.487513 | -0.738942 | -2.269952 |
| C  | -2.162036 | -4.230746 | 1.590231  |
| P  | 0.783073  | -2.700032 | 0.431522  |
| C  | -0.051771 | -1.395343 | 4.322106  |
| C  | -0.238850 | -1.904641 | 3.038900  |
| C  | 1.209360  | -0.953752 | 4.729996  |
| C  | 0.832260  | -1.988597 | 2.135993  |
| C  | 2.275441  | -1.005171 | 3.836209  |
| C  | 2.084379  | -1.513127 | 2.549769  |
| C  | 1.987502  | -6.348784 | 1.981496  |
| C  | 1.757977  | -4.981195 | 1.826240  |
| C  | 1.487396  | -7.257986 | 1.050483  |
| C  | 1.017296  | -4.503645 | 0.737918  |
| C  | 0.757501  | -6.790061 | -0.043219 |
| C  | 0.527831  | -5.424854 | -0.200665 |
| H  | 3.104769  | -0.315115 | -0.024905 |
| H  | 5.527110  | -0.550282 | -0.432127 |
| H  | 6.576576  | 0.536326  | -2.403353 |
| H  | 2.773325  | 2.214854  | -3.513655 |
| H  | 5.195273  | 1.947025  | -3.926755 |
| H  | 0.928495  | 5.917698  | -1.893374 |
| H  | 1.647950  | 3.749192  | -0.945751 |
| H  | -0.665000 | 5.980873  | -3.810275 |
| H  | -1.518808 | 3.850803  | -4.779832 |
| H  | -0.796090 | 1.679931  | -3.837273 |
| H  | 1.516557  | 0.210323  | -4.414935 |
| H  | 2.724664  | -1.539068 | -2.731586 |
| H  | 2.715653  | -2.011641 | -4.434705 |
| H  | 1.245177  | -3.345658 | -2.222277 |
| H  | 1.272890  | -3.830213 | -3.920131 |
| H  | -1.159863 | -4.074980 | -4.474697 |
| H  | -2.377686 | -2.976813 | -3.782616 |
| H  | -1.450288 | -4.057476 | -2.721876 |
| H  | 0.794337  | -1.338554 | -6.668696 |
| H  | -0.387436 | -2.637787 | -6.430503 |
| H  | 1.258715  | -2.813769 | -5.802969 |
| H  | -0.955432 | 0.205604  | -5.802033 |
| H  | -1.717955 | -0.050045 | -4.213581 |
| H  | -2.023029 | -1.184014 | -5.535199 |
| H  | -3.600268 | -1.240636 | -3.243964 |
| H  | -2.986962 | 0.225211  | -2.437764 |
| H  | -4.486491 | -0.518328 | -1.874595 |
| H  | -2.905228 | -3.966317 | 2.357531  |
| H  | -1.197727 | -4.393416 | 2.084228  |
| H  | -2.470608 | -5.191504 | 1.147305  |
| H  | -0.901184 | -1.338839 | 5.007254  |
| H  | -1.237671 | -2.222767 | 2.747325  |
| H  | 1.350747  | -0.550541 | 5.735755  |
| H  | 3.267585  | -0.625643 | 4.086703  |
| H  | 2.945491  | -1.510014 | 1.876884  |
| H  | 2.561065  | -6.703611 | 2.841219  |
| H  | 2.154576  | -4.285499 | 2.569612  |
| H  | 1.665725  | -8.328373 | 1.176628  |
| H  | 0.361599  | -7.493500 | -0.779807 |
| H  | -0.055306 | -5.074445 | -1.056785 |
| Cu | 0.225738  | 1.380947  | 0.663724  |
| H  | -2.228827 | 0.577941  | 2.751336  |
| H  | -2.135774 | -0.623813 | 1.479056  |
| H  | -1.893227 | 0.985600  | -0.287004 |
| H  | 5.892151  | 3.669532  | -0.271238 |
| H  | 7.070901  | 2.326635  | -0.137626 |
| H  | 6.974324  | 3.560171  | 1.148602  |
| C  | 5.173652  | 2.425156  | 4.092004  |
| H  | 5.590131  | 2.825560  | 5.029360  |
| H  | 4.321812  | 1.767859  | 4.339959  |
| H  | 4.787047  | 3.273465  | 3.497936  |

142

Figure 1\_pi-allyl\_major\_03 / electronic energy: -5826.80299964 a.u. / lowest freq: 13.04 cm-1

|   |           |           |           |
|---|-----------|-----------|-----------|
| C | -1.411603 | -1.919227 | -2.109234 |
| C | -0.389358 | -2.578018 | -1.350087 |
| C | 0.757083  | -1.916936 | -0.987979 |
| O | 3.247883  | -3.292303 | -1.731570 |
| P | 3.214159  | -4.603215 | -0.995113 |
| O | 4.402506  | -5.203699 | -0.311182 |
| O | 1.974013  | -4.452760 | 0.103223  |
| O | 2.600098  | -5.772679 | -1.979495 |
| C | 1.786679  | -5.470166 | 1.051084  |
| H | -2.333935 | -2.457204 | -2.329373 |
| H | -1.110564 | -1.175314 | -2.857422 |
| H | -0.633495 | -3.519184 | -0.845399 |
| H | 1.094538  | -1.038778 | -1.540537 |
| H | 1.444905  | -2.364022 | -0.273612 |
| B | -5.311993 | 0.362189  | -1.579696 |
| O | -6.411640 | -0.115430 | -2.229384 |
| O | -5.629919 | 1.120360  | -0.484892 |
| C | -7.580267 | 0.463233  | -1.608048 |
| C | -7.025415 | 0.899100  | -0.200480 |
| C | -8.679851 | -0.584454 | -1.558445 |
| C | -8.009983 | 1.644871  | -2.473877 |
| C | -7.092141 | -0.217029 | 0.841696  |
| C | -7.631925 | 2.175147  | 0.358172  |

|   |           |           |           |
|---|-----------|-----------|-----------|
| H | -6.666192 | -1.156197 | 0.457543  |
| H | -8.125849 | -0.406497 | 1.164504  |
| H | -6.503172 | 0.080298  | 1.721796  |
| H | -7.451076 | 3.036433  | -0.298026 |
| H | -7.188707 | 2.395491  | 1.340723  |
| H | -8.717177 | 2.058827  | 0.496622  |
| H | -7.231485 | 2.421218  | -2.511764 |
| H | -8.938715 | 2.100050  | -2.101000 |
| H | -8.188373 | 1.291946  | -3.500161 |
| H | -9.548814 | -0.207533 | -0.998588 |
| H | -8.332446 | -1.513408 | -1.088149 |
| H | -9.012372 | -0.824375 | -2.579231 |
| C | -3.612117 | -2.120821 | 1.217367  |
| C | -4.189909 | -3.252765 | 1.783814  |
| C | -3.785439 | -1.813650 | -0.144443 |
| C | -4.963114 | -4.113253 | 1.001649  |
| C | -4.561802 | -2.692556 | -0.918084 |
| C | -5.145574 | -3.825190 | -0.350228 |
| C | -3.168042 | -0.576003 | -0.703876 |
| C | -3.815616 | 0.022699  | -1.944099 |
| H | -5.753762 | -4.485669 | -0.973327 |
| H | -4.737178 | -2.482993 | -1.975048 |
| H | -5.422648 | -4.999760 | 1.444655  |
| H | -4.042421 | -3.458301 | 2.846911  |
| H | -3.026201 | -1.446214 | 1.845120  |
| P | -0.445407 | 0.546222  | 1.283946  |
| C | 1.704478  | 0.522385  | 3.122198  |
| C | 2.620095  | -0.119288 | 3.953007  |
| C | 0.845498  | -0.227739 | 2.313453  |
| C | 2.685086  | -1.511508 | 3.981582  |
| C | 0.910172  | -1.626390 | 2.351888  |
| C | 1.828923  | -2.265673 | 3.180181  |
| C | -4.105183 | 1.598873  | 2.792297  |
| C | -2.958491 | 1.521079  | 2.007244  |
| C | -1.844041 | 0.788857  | 2.442124  |
| C | -4.152765 | 0.947154  | 4.025033  |
| C | -3.043104 | 0.231800  | 4.472512  |
| C | -1.892687 | 0.151269  | 3.686927  |
| C | -0.394853 | 3.529349  | 1.472461  |
| C | 0.025522  | 2.226205  | 0.797159  |
| C | 0.730099  | 2.560643  | -0.305636 |
| C | 0.899374  | 4.167859  | 2.042891  |
| C | 1.681100  | 4.548361  | 0.769601  |
| C | 0.738565  | 4.096233  | -0.389768 |
| C | 1.076128  | 4.709367  | -1.733107 |
| C | -0.671183 | 4.420512  | 0.228769  |
| C | -0.899136 | 5.902953  | 0.541393  |
| C | -1.866960 | 3.962296  | -0.609989 |
| C | 1.420949  | 1.687699  | -1.286340 |
| C | 0.848258  | 1.381595  | -2.498356 |
| C | 2.765405  | 1.150115  | -1.144280 |
| S | 1.934911  | 0.456196  | -3.469545 |
| C | 3.172096  | 0.447073  | -2.261000 |
| C | -0.526946 | 1.698561  | -2.997294 |
| C | 4.425400  | -0.320034 | -2.537653 |
| P | 3.799177  | 1.611020  | 0.306228  |
| C | 4.927907  | -2.288548 | 1.254019  |
| C | 4.288759  | -1.220461 | 0.615634  |
| C | 5.812147  | -2.052625 | 2.304481  |
| C | 4.539337  | 0.093682  | 1.020122  |
| C | 6.050874  | -0.745087 | 2.732466  |
| C | 5.409776  | 0.316129  | 2.101697  |
| C | 7.572007  | 2.546031  | -1.230088 |
| C | 6.539667  | 1.868495  | -0.579158 |
| C | 7.326651  | 3.761140  | -1.867017 |
| C | 5.242733  | 2.395841  | -0.554295 |
| C | 6.039254  | 4.299754  | -1.844415 |
| C | 5.011051  | 3.626469  | -1.188123 |
| H | 1.664786  | 1.611219  | 3.102028  |
| H | 3.293281  | 0.474753  | 4.574234  |
| H | 3.412863  | -2.011682 | 4.624047  |
| H | 0.240284  | -2.224589 | 1.731287  |
| H | 1.884281  | -3.355930 | 3.188892  |
| H | -4.966881 | 2.161495  | 2.428059  |
| H | -2.936974 | 2.038246  | 1.046047  |
| H | -5.056027 | 0.998290  | 4.637277  |
| H | -3.070231 | -0.273537 | 5.440358  |
| H | -1.036627 | -0.422317 | 4.048013  |
| H | -1.210186 | 3.448405  | 2.201168  |
| H | 1.452275  | 3.472466  | 2.686289  |
| H | 0.654728  | 5.046228  | 2.657039  |
| H | 2.653440  | 4.044891  | 0.708470  |
| H | 1.865608  | 5.630309  | 0.699549  |
| H | 1.142207  | 5.804712  | -1.647066 |
| H | 0.318959  | 4.478112  | -2.496065 |
| H | 2.043475  | 4.344561  | -2.110872 |
| H | -1.799918 | 6.019241  | 1.164834  |
| H | -1.074170 | 6.462564  | -0.390962 |
| H | -0.068835 | 6.392942  | 1.064325  |
| H | -2.807301 | 4.197944  | -0.087236 |
| H | -1.863105 | 2.886762  | -0.822768 |
| H | -1.893322 | 4.495073  | -1.573538 |
| H | -0.692448 | 2.780985  | -3.092442 |
| H | -1.281819 | 1.310190  | -2.298522 |
| H | -0.717003 | 1.243838  | -3.979291 |
| H | 4.231720  | -1.400583 | -2.412993 |
| H | 5.223630  | -0.031304 | -1.844821 |

|    |           |           |           |
|----|-----------|-----------|-----------|
| H  | 4.782860  | -0.141883 | -3.563090 |
| H  | 4.754191  | -3.308731 | 0.896737  |
| H  | 3.620657  | -1.448545 | -0.217391 |
| H  | 6.316450  | -2.890829 | 2.792085  |
| H  | 6.736130  | -0.550693 | 3.561413  |
| H  | 5.596446  | 1.338003  | 2.447051  |
| H  | 8.574483  | 2.111472  | -1.243560 |
| H  | 6.752277  | 0.912374  | -0.096423 |
| H  | 8.136020  | 4.287935  | -2.378143 |
| H  | 5.834492  | 5.253679  | -2.336531 |
| H  | 4.010407  | 4.066520  | -1.173230 |
| Cu | -1.157537 | -0.806721 | -0.473526 |
| H  | -3.761455 | -0.632436 | -2.826852 |
| H  | -3.303539 | 0.959689  | -2.215819 |
| H  | -3.172640 | 0.181133  | 0.087348  |
| H  | 0.856559  | -5.261263 | 1.602023  |
| H  | 2.622687  | -5.524634 | 1.768239  |
| H  | 1.683878  | -6.461240 | 0.573928  |
| C  | 1.478454  | -5.477164 | -2.770679 |
| H  | 1.404577  | -6.237953 | -3.563106 |
| H  | 1.566316  | -4.483468 | -3.241043 |
| H  | 0.543013  | -5.504143 | -2.182330 |

64

Figure 2\_L-Cu-OtBu dimer / electronic energy: -4357.97211601 a.u. / lowest freq: -19.85 cm-1

|    |           |           |           |
|----|-----------|-----------|-----------|
| H  | -1.057876 | -2.823794 | -2.825878 |
| H  | -1.980246 | -2.667714 | -1.312041 |
| O  | 0.078207  | -1.017819 | -1.258789 |
| C  | -1.048228 | -3.061420 | -1.749889 |
| H  | -1.045898 | -4.158508 | -1.636503 |
| C  | 0.158516  | -2.389922 | -1.074836 |
| H  | 1.475367  | -2.665464 | -2.785121 |
| H  | -0.759805 | -2.350911 | 0.894993  |
| C  | 1.458383  | -2.909326 | -1.710688 |
| C  | 0.156991  | -2.742073 | 0.424044  |
| H  | 2.324017  | -2.413213 | -1.241845 |
| H  | 1.581586  | -3.999730 | -1.600580 |
| H  | 1.020173  | -2.268300 | 0.919277  |
| H  | 0.205803  | -3.828385 | 0.609487  |
| Cu | 1.378579  | 0.329330  | -0.465065 |
| H  | 2.131666  | -0.991227 | 3.381390  |
| H  | 4.682348  | -1.405429 | 2.732758  |
| H  | 5.481708  | -1.718565 | 0.494438  |
| H  | 4.675857  | -1.081458 | -2.009653 |
| C  | 2.171292  | -0.117226 | 2.712040  |
| C  | 4.582052  | -0.512693 | 2.098216  |
| H  | 1.198856  | -0.010984 | 2.213049  |
| N  | 3.192040  | -0.289898 | 1.712946  |
| C  | 3.045354  | -0.000511 | 0.406199  |
| C  | 5.265779  | -0.663084 | 0.738250  |
| N  | 4.251927  | -0.137199 | -0.170576 |
| H  | 3.612584  | 0.354358  | -2.080687 |
| C  | 4.493554  | -0.077568 | -1.587637 |
| H  | 2.354764  | 0.782239  | 3.326204  |
| H  | 4.963659  | 0.354622  | 2.665833  |
| H  | 6.206045  | -0.097525 | 0.661498  |
| H  | 5.369453  | 0.553572  | -1.807185 |
| H  | -0.378809 | 4.066234  | 1.363434  |
| H  | -1.215620 | 2.487467  | 1.315536  |
| C  | -0.309944 | 3.028560  | 0.996342  |
| H  | -1.542344 | 4.628000  | -0.917965 |
| H  | -2.304280 | 3.010119  | -0.908883 |
| H  | 0.559090  | 2.547332  | 1.474899  |
| C  | -1.400215 | 3.570787  | -1.196882 |
| C  | -0.167055 | 2.941122  | -0.531923 |
| H  | 1.054762  | 4.773347  | -0.703921 |
| H  | -1.305843 | 3.511187  | -2.293040 |
| C  | 1.092639  | 3.703570  | -0.968950 |
| O  | -0.065048 | 1.615388  | -0.935560 |
| H  | 1.981855  | 3.258646  | -0.494162 |
| H  | 1.220534  | 3.621154  | -2.060206 |
| Cu | -1.382126 | 0.156912  | -0.516840 |
| H  | -2.351582 | 0.600724  | 3.422431  |
| H  | -4.934218 | -0.004844 | 2.870939  |
| H  | -6.034910 | 0.158807  | 0.756762  |
| H  | -5.219728 | 0.475454  | -1.806850 |
| C  | -2.122775 | -0.170906 | 2.668848  |
| C  | -4.523985 | -0.695038 | 2.117592  |
| H  | -1.198578 | 0.107935  | 2.144915  |
| N  | -3.185413 | -0.283990 | 1.706499  |
| C  | -3.039380 | -0.179163 | 0.373767  |
| C  | -5.297331 | -0.660916 | 0.794239  |
| N  | -4.235455 | -0.434437 | -0.181200 |
| H  | -3.591154 | -0.191053 | -2.134929 |
| C  | -4.528168 | -0.356233 | -1.586950 |
| H  | -1.956896 | -1.128121 | 3.192726  |
| H  | -4.493762 | -1.703279 | 2.564902  |
| H  | -5.829131 | -1.601827 | 0.585031  |
| H  | -4.988412 | -1.291515 | -1.945367 |

32

Figure 2\_L-Cu-OtBu / electronic energy: -2178.96309100 a.u. / lowest freq: 32.39 cm-1

|   |          |           |           |
|---|----------|-----------|-----------|
| H | 4.562030 | -0.987762 | -1.171425 |
| H | 4.380081 | -1.687590 | 0.453032  |
| O | 2.059982 | -0.792706 | -0.375405 |
| C | 4.412589 | -0.739884 | -0.108257 |
| H | 5.285124 | -0.160867 | 0.237784  |
| C | 3.083853 | 0.016444  | 0.070903  |
| H | 3.239088 | 1.094749  | -1.813757 |



|    |           |           |           |
|----|-----------|-----------|-----------|
| H  | 2.816631  | -0.564871 | 2.149701  |
| C  | 3.141678  | 1.325832  | -0.740702 |
| C  | 2.905653  | 0.363686  | 1.562854  |
| H  | 2.203830  | 1.891377  | -0.606175 |
| H  | 3.980920  | 1.980488  | -0.449346 |
| H  | 1.973161  | 0.937231  | 1.704528  |
| H  | 3.740138  | 0.957642  | 1.973285  |
| Cu | 0.281496  | -0.385007 | -0.217334 |
| H  | -2.761249 | -2.831320 | 0.955264  |
| H  | -4.389467 | -0.710878 | 1.073176  |
| H  | -3.900683 | 1.628760  | 1.086134  |
| H  | -1.572215 | 2.982676  | 0.893515  |
| C  | -2.368865 | -2.376101 | 0.031132  |
| C  | -3.894740 | -0.371839 | 0.149702  |
| H  | -1.295333 | -2.593746 | -0.043339 |
| N  | -2.556823 | -0.949305 | 0.044007  |
| C  | -1.588253 | -0.032817 | -0.058431 |
| C  | -3.606305 | 1.135384  | 0.145880  |
| N  | -2.155228 | 1.178072  | -0.017727 |
| H  | -0.385003 | 2.236847  | -0.219836 |
| C  | -1.452620 | 2.433488  | -0.055287 |
| H  | -2.885552 | -2.835640 | -0.827649 |
| H  | -4.517059 | -0.688565 | -0.702765 |
| H  | -4.103640 | 1.662997  | -0.682992 |
| H  | -1.827633 | 3.068788  | -0.873938 |

74

Figure 2\_ed / electronic energy: -3000.72395415 a.u. / lowest freq: -18.37 cm<sup>-1</sup>

|    |           |           |           |
|----|-----------|-----------|-----------|
| H  | -4.229726 | 2.326034  | -0.150745 |
| H  | -5.967249 | 0.343716  | 0.271356  |
| H  | -3.598722 | -3.318573 | 1.735428  |
| H  | -5.751654 | -1.943746 | 0.936556  |
| H  | -2.602038 | 1.801266  | -0.690477 |
| H  | -2.058957 | -2.801506 | 0.982474  |
| C  | -3.680511 | 1.617234  | -0.792634 |
| C  | -3.082739 | -0.631120 | 0.042698  |
| N  | -3.970093 | 0.257841  | -0.410861 |
| N  | -3.731163 | -1.761591 | 0.333175  |
| C  | -3.126225 | -2.981981 | 0.798743  |
| C  | -5.341967 | -0.246351 | -0.418210 |
| C  | -5.161926 | -1.699720 | 0.039540  |
| H  | -3.978015 | 1.799131  | -1.838489 |
| H  | -5.779726 | -0.163645 | -1.424914 |
| H  | -3.228038 | -3.784690 | 0.049042  |
| H  | -5.421195 | -2.428940 | -0.745075 |
| H  | -1.082452 | 3.518912  | 1.603248  |
| H  | 0.421000  | 3.855965  | 0.726137  |
| O  | 0.362799  | 1.259831  | 1.681643  |
| C  | 0.000087  | 3.675244  | 1.723920  |
| H  | 0.157069  | 4.577191  | 2.336829  |
| C  | 0.647440  | 2.454235  | 2.386838  |
| H  | -1.041587 | 2.096285  | 3.707116  |
| H  | 2.616865  | 2.798759  | 1.517328  |
| C  | 0.046175  | 2.252029  | 3.779325  |
| C  | 2.162870  | 2.651821  | 2.505931  |
| H  | 0.485762  | 1.362278  | 4.255566  |
| H  | 0.231377  | 3.121792  | 4.428639  |
| H  | 2.624169  | 1.758465  | 2.954414  |
| H  | 2.399418  | 3.521663  | 3.139641  |
| Cu | -1.156351 | -0.318937 | 0.168491  |
| H  | 3.647599  | -2.084771 | -1.808356 |
| H  | 4.667626  | -2.150948 | 0.441562  |
| H  | 3.655695  | -0.715072 | 0.059525  |
| C  | 3.791806  | -1.560284 | 0.748890  |
| H  | 3.766971  | -3.811735 | -1.373951 |
| H  | 3.989671  | -1.143848 | 1.747863  |
| C  | 3.071698  | -3.006853 | -1.658071 |
| H  | 2.610722  | -3.279576 | -2.619431 |
| C  | 1.991855  | -2.826667 | -0.601374 |
| C  | 2.522294  | -2.409985 | 0.814491  |
| O  | 1.169976  | -1.706527 | -0.954041 |
| H  | 3.446123  | -4.284636 | 1.408303  |
| B  | 0.804805  | -1.023733 | 0.203641  |
| H  | 3.081088  | -3.176114 | 2.752087  |
| C  | 2.709243  | -3.561359 | 1.790696  |
| O  | 1.472302  | -1.555242 | 1.289645  |
| H  | 1.649931  | -4.980210 | -0.367044 |
| C  | 1.084847  | -4.057441 | -0.565083 |
| H  | 0.586842  | -4.163168 | -1.540589 |
| H  | 1.766043  | -4.089918 | 1.981929  |
| H  | 0.303393  | -3.954382 | 0.202674  |
| H  | 0.142553  | 4.036318  | -1.814791 |
| H  | 2.021822  | 3.781526  | -0.667704 |
| H  | -1.142136 | 3.179841  | -2.691591 |
| C  | -0.059830 | 3.194506  | -2.489871 |
| O  | -0.270892 | 1.738450  | -0.614242 |
| H  | 2.659078  | 3.660530  | -2.329825 |
| C  | 2.572105  | 3.136225  | -1.366163 |
| H  | 0.457094  | 3.377402  | -3.444530 |
| B  | 0.601562  | 1.008532  | 0.304352  |
| H  | 3.586208  | 2.995173  | -0.962469 |
| C  | 0.360180  | 1.861111  | -1.877169 |
| C  | 1.904481  | 1.766240  | -1.514568 |
| O  | 1.926733  | 1.143401  | -0.240157 |
| H  | -1.221585 | 0.778172  | -2.863054 |
| C  | -0.123344 | 0.730502  | -2.793547 |
| H  | 0.281161  | 0.832229  | -3.811835 |
| H  | 0.157572  | -0.257891 | -2.407175 |

|   |          |           |           |
|---|----------|-----------|-----------|
| H | 2.663210 | 1.336698  | -3.516069 |
| C | 2.714992 | 0.923238  | -2.496709 |
| H | 3.773217 | 0.915775  | -2.191785 |
| H | 2.356419 | -0.113387 | -2.509049 |

74

Figure 2\_ts(TB) / electronic energy: -3000.72314236 a.u. / lowest freq: -71.58 cm<sup>-1</sup>

|    |           |           |           |
|----|-----------|-----------|-----------|
| H  | -4.448283 | 1.831801  | -0.546545 |
| H  | -6.034945 | -0.274227 | -0.136759 |
| H  | -3.216551 | -3.476593 | 1.843614  |
| H  | -5.506494 | -2.318901 | 0.990513  |
| H  | -2.733610 | 1.438777  | -0.890484 |
| H  | -1.787148 | -3.089113 | 0.837440  |
| C  | -3.773199 | 1.128838  | -1.061090 |
| C  | -2.995601 | -1.009119 | -0.092528 |
| N  | -3.958927 | -0.208011 | -0.557112 |
| N  | -3.547831 | -2.188579 | 0.211178  |
| C  | -2.863967 | -3.303706 | 0.812657  |
| C  | -5.261789 | -0.864729 | -0.651030 |
| C  | -4.996322 | -2.217748 | 0.017945  |
| H  | -3.991266 | 1.174517  | -2.142029 |
| H  | -5.558704 | -0.964972 | -1.708457 |
| H  | -3.032398 | -4.223784 | 0.230395  |
| H  | -5.289878 | -3.073253 | -0.608926 |
| H  | -1.889619 | 3.082951  | 1.743967  |
| H  | -0.475447 | 3.841768  | 0.978387  |
| O  | 0.012370  | 1.213800  | 1.663904  |
| C  | -0.874460 | 3.464722  | 1.930869  |
| H  | -0.944087 | 4.308818  | 2.634747  |
| C  | 0.013393  | 2.358438  | 2.507367  |
| H  | -1.580508 | 1.488051  | 3.697900  |
| H  | 1.869593  | 3.236060  | 1.766788  |
| C  | -0.558425 | 1.872271  | 3.838323  |
| C  | 1.443340  | 2.866966  | 2.709358  |
| H  | 0.060226  | 1.055179  | 4.239327  |
| H  | -0.588936 | 2.683719  | 4.581426  |
| H  | 2.086995  | 2.051714  | 3.072839  |
| H  | 1.463920  | 3.684030  | 3.447489  |
| Cu | -1.064796 | -0.614475 | 0.066837  |
| H  | 4.152179  | -1.222790 | -1.601625 |
| H  | 4.926631  | -1.208560 | 0.732258  |
| H  | 3.609618  | -0.050027 | 0.333136  |
| C  | 3.901707  | -0.891709 | 0.976936  |
| H  | 4.666629  | -2.898230 | -1.268204 |
| H  | 3.893798  | -0.529670 | 2.016219  |
| C  | 3.817631  | -2.267672 | -1.575410 |
| H  | 3.534087  | -2.557519 | -2.598835 |
| C  | 2.634973  | -2.459067 | -0.637358 |
| C  | 2.900430  | -2.039896 | 0.849730  |
| O  | 1.576663  | -1.571157 | -1.014383 |
| H  | 4.231911  | -3.656063 | 1.429621  |
| B  | 0.913650  | -1.122778 | 0.130318  |
| H  | 3.464389  | -2.800114 | 2.789141  |
| C  | 3.297763  | -3.183901 | 1.771368  |
| O  | 1.621543  | -1.531095 | 1.251149  |
| H  | 2.864132  | -4.640428 | -0.558217 |
| C  | 2.093462  | -3.884147 | -0.768821 |
| H  | 1.733821  | -4.037022 | -1.797388 |
| H  | 2.516389  | -3.953389 | 1.826435  |
| H  | 1.245776  | -4.049768 | -0.087193 |
| H  | -0.420230 | 4.054241  | -1.831844 |
| H  | 1.344645  | 4.063200  | -0.458545 |
| H  | -1.457836 | 3.001197  | -2.817127 |
| C  | -0.416657 | 3.197554  | -2.518434 |
| O  | -0.527086 | 1.723785  | -0.642973 |
| H  | 2.129607  | 4.141849  | -2.060330 |
| C  | 2.062456  | 3.564957  | -1.125973 |
| H  | 0.146515  | 3.473608  | -3.422999 |
| B  | 0.378612  | 1.188218  | 0.318412  |
| H  | 3.048455  | 3.588701  | -0.638400 |
| C  | 0.169014  | 1.950819  | -1.865317 |
| C  | 1.669377  | 2.108377  | -1.380171 |
| O  | 1.690769  | 1.442805  | -0.120721 |
| H  | -1.129452 | 0.602593  | -2.935045 |
| C  | -0.047937 | 0.753365  | -2.794138 |
| H  | 0.399213  | 0.929741  | -3.783876 |
| H  | 0.379967  | -0.167761 | -2.378157 |
| H  | 2.645391  | 1.898337  | -3.314327 |
| C  | 2.688765  | 1.457115  | -2.306623 |
| H  | 3.703702  | 1.618116  | -1.911727 |
| H  | 2.515077  | 0.376425  | -2.376759 |

74

Figure 2\_prod / electronic energy: -3000.74272641 a.u. / lowest freq: 20.41 cm<sup>-1</sup>

|   |           |           |           |
|---|-----------|-----------|-----------|
| H | -3.886200 | 1.904460  | 0.040425  |
| H | -5.783170 | -0.000028 | 0.231301  |
| H | -3.671290 | -4.009664 | 0.712028  |
| H | -5.779110 | -2.391811 | 0.307129  |
| H | -2.431530 | 1.418920  | -0.867743 |
| H | -2.156883 | -3.467472 | -0.075581 |
| C | -3.521445 | 1.318515  | -0.819820 |
| C | -3.044171 | -1.083929 | -0.477400 |
| N | -3.884978 | -0.068040 | -0.690769 |
| N | -3.774686 | -2.199854 | -0.351226 |
| C | -3.248139 | -3.529587 | -0.185304 |
| C | -5.293235 | -0.458612 | -0.643950 |
| C | -5.207063 | -1.984777 | -0.540404 |
| H | -3.958179 | 1.745967  | -1.737311 |
| H | -5.823136 | -0.116425 | -1.545676 |

|    |           |           |           |
|----|-----------|-----------|-----------|
| H  | -3.484024 | -4.160187 | -1.059528 |
| H  | -5.550488 | -2.493752 | -1.456806 |
| H  | -0.953241 | 3.764861  | 3.357981  |
| H  | 0.759299  | 3.428938  | 2.975556  |
| O  | -0.875512 | 1.986080  | 1.406417  |
| C  | -0.148430 | 3.018702  | 3.444873  |
| H  | 0.062558  | 2.860737  | 4.513442  |
| C  | -0.552175 | 1.706030  | 2.774674  |
| H  | -2.662097 | 1.885852  | 3.254227  |
| H  | 1.522396  | 1.080215  | 2.546667  |
| C  | -1.843289 | 1.160855  | 3.378161  |
| C  | 0.563820  | 0.669955  | 2.888868  |
| H  | -2.130100 | 0.224690  | 2.875511  |
| H  | -1.717424 | 0.955828  | 4.451620  |
| H  | 0.344931  | -0.216712 | 2.276614  |
| H  | 0.673948  | 0.353697  | 3.937508  |
| Cu | -1.061912 | -1.136593 | -0.315311 |
| H  | 4.402647  | -0.650240 | -0.989617 |
| H  | 4.621398  | -1.002509 | 1.402523  |
| H  | 3.160136  | -0.085512 | 0.918287  |
| C  | 3.522073  | -0.979220 | 1.447740  |
| H  | 5.192444  | -2.244337 | -0.885959 |
| H  | 3.226802  | -0.887955 | 2.503535  |
| C  | 4.303465  | -1.709747 | -1.255594 |
| H  | 4.297891  | -1.782907 | -2.353926 |
| C  | 3.032949  | -2.326933 | -0.689967 |
| C  | 2.899711  | -2.248976 | 0.864652  |
| O  | 1.888776  | -1.577832 | -1.121179 |
| H  | 4.481998  | -3.631811 | 1.423538  |
| B  | 0.903669  | -1.611522 | -0.123564 |
| H  | 3.275879  | -3.326507 | 2.696880  |
| C  | 3.409346  | -3.471239 | 1.614104  |
| O  | 1.480199  | -2.146878 | 1.031772  |
| H  | 3.743816  | -4.379616 | -1.009699 |
| C  | 2.869341  | -3.749566 | -1.231268 |
| H  | 2.746510  | -3.702507 | -2.323658 |
| H  | 2.863688  | -4.380535 | 1.328701  |
| H  | 1.973529  | -4.232021 | -0.812859 |
| H  | 0.385110  | 4.774697  | -2.173196 |
| H  | 1.496802  | 4.695314  | -0.164989 |
| C  | -0.507126 | 3.734422  | -3.303777 |
| C  | 0.419699  | 3.821781  | -2.717391 |
| O  | -0.524972 | 2.690348  | -0.813439 |
| H  | 2.757526  | 4.544486  | -1.420219 |
| C  | 2.313155  | 4.059293  | -0.539290 |
| H  | 1.265214  | 3.846315  | -3.421248 |
| B  | -0.030339 | 2.224887  | 0.383639  |
| H  | 3.082788  | 4.000577  | 0.244528  |
| C  | 0.538550  | 2.632846  | -1.776365 |
| C  | 1.822046  | 2.649090  | -0.858748 |
| O  | 1.334459  | 2.085967  | 0.372262  |
| H  | -0.612874 | 1.326243  | -3.039970 |
| C  | 0.375562  | 1.330242  | -2.556106 |
| H  | 1.139110  | 1.225440  | -3.340341 |
| H  | 0.434150  | 0.455202  | -1.891068 |
| H  | 3.294722  | 2.132517  | -2.363615 |
| C  | 2.962520  | 1.788006  | -1.372089 |
| H  | 3.820345  | 1.859265  | -0.686128 |
| H  | 2.658330  | 0.735648  | -1.440404 |

39

Figure 2\_L-Cu-Bpin / electronic energy: -2356.95154150 a.u. / lowest freq: 22.11 cm<sup>-1</sup>

|    |           |           |           |
|----|-----------|-----------|-----------|
| H  | -4.270736 | -2.604302 | 0.699216  |
| H  | -3.469511 | -2.304962 | -1.601614 |
| C  | -4.343959 | -1.520428 | 0.875987  |
| H  | -4.082488 | -1.334048 | 1.925984  |
| H  | -5.392484 | -1.222875 | 0.718439  |
| C  | -3.691752 | -1.230867 | -1.514808 |
| O  | -2.057742 | -1.109903 | 0.223326  |
| H  | -4.742108 | -1.073870 | -1.802677 |
| C  | -3.418948 | -0.778798 | -0.078579 |
| H  | -3.048558 | -0.694945 | -2.228327 |
| B  | -1.238080 | -0.000001 | -0.000001 |
| H  | -3.048552 | 0.694945  | 2.228328  |
| C  | -3.418947 | 0.778799  | 0.078581  |
| H  | -4.742104 | 1.073871  | 1.802681  |
| O  | -2.057741 | 1.109902  | -0.223328 |
| C  | -3.691747 | 1.230867  | 1.514810  |
| H  | -5.392484 | 1.222879  | -0.718433 |
| H  | -4.082491 | 1.334050  | -1.925981 |
| C  | -4.343959 | 1.520430  | -0.875984 |
| H  | -3.469505 | 2.304963  | 1.601615  |
| H  | -4.270733 | 2.604304  | -0.699213 |
| Cu | 0.797333  | -0.000001 | -0.000002 |
| H  | 3.463333  | -3.022428 | -0.742996 |
| H  | 5.468944  | -1.227903 | -0.850209 |
| H  | 5.489479  | 1.160908  | -0.929040 |
| H  | 3.459252  | 2.934328  | -1.042286 |
| C  | 3.103330  | -2.441738 | 0.122397  |
| C  | 4.991258  | -0.767023 | 0.029199  |
| H  | 2.005088  | -2.444141 | 0.118745  |
| N  | 3.563409  | -1.079451 | 0.055881  |
| C  | 2.777376  | 0.000000  | 0.000000  |
| C  | 4.991258  | 0.767025  | -0.029195 |
| N  | 3.563409  | 1.079451  | -0.055879 |
| H  | 2.005087  | 2.444141  | -0.118746 |
| C  | 3.103329  | 2.441739  | -0.122398 |
| H  | 3.459253  | -2.934329 | 1.042284  |

|   |          |           |          |
|---|----------|-----------|----------|
| H | 5.489478 | -1.160906 | 0.929045 |
| H | 5.468941 | 1.227905  | 0.850214 |
| H | 3.463332 | 3.022430  | 0.742995 |

63

Figure 2\_para-NMe2\_pcl / electronic energy: -2800.13914226 a.u. / lowest freq: 11.78 cm-1

|    |           |           |           |
|----|-----------|-----------|-----------|
| H  | -1.333971 | 0.243414  | 3.056739  |
| H  | -1.893376 | 2.829609  | 3.069201  |
| H  | -0.688071 | 4.552383  | 1.916772  |
| H  | 0.998491  | 4.702807  | -0.211619 |
| C  | -1.373470 | 0.282834  | 1.956552  |
| C  | -1.944602 | 2.741995  | 1.973929  |
| H  | -0.596041 | -0.378332 | 1.551730  |
| N  | -1.133518 | 1.624953  | 1.495244  |
| C  | -0.349919 | 1.950940  | 0.461461  |
| C  | -1.310196 | 3.932532  | 1.247769  |
| N  | -0.473028 | 3.268081  | 0.252315  |
| H  | 0.856454  | 3.322226  | -1.337625 |
| C  | 0.287785  | 4.020402  | -0.708683 |
| H  | -2.359725 | -0.087483 | 1.627340  |
| H  | -3.001033 | 2.588891  | 1.692196  |
| H  | -2.050980 | 4.589107  | 0.767875  |
| H  | -0.374671 | 4.621842  | -1.352210 |
| H  | -2.767736 | -3.170397 | -0.236803 |
| C  | -4.120942 | -1.463589 | -0.294555 |
| C  | -2.899880 | -2.132180 | -0.540668 |
| H  | -5.106753 | 0.465927  | -0.533520 |
| C  | -4.197617 | -0.111173 | -0.702935 |
| H  | 3.717471  | -3.695181 | 1.377144  |
| C  | -1.838147 | -1.491617 | -1.169100 |
| H  | 3.285411  | -1.815466 | 2.900357  |
| H  | -0.913655 | -2.054844 | -1.319349 |
| C  | -3.124255 | 0.511400  | -1.329702 |
| C  | -1.915640 | -0.153276 | -1.586486 |
| C  | 4.320631  | -3.077535 | 0.694244  |
| C  | 4.021795  | -1.222272 | 2.337804  |
| H  | 4.133536  | -3.430286 | -0.328621 |
| O  | 2.597283  | -1.412067 | 0.430536  |
| H  | -3.227248 | 1.561189  | -1.621345 |
| H  | 5.016188  | -1.413817 | 2.768306  |
| H  | 5.382390  | -3.245359 | 0.933266  |
| C  | 3.949569  | -1.610813 | 0.859570  |
| C  | -0.785244 | 0.562879  | -2.210379 |
| B  | 2.470938  | -0.152892 | -0.164855 |
| H  | 0.542092  | -1.112693 | -2.610797 |
| C  | 0.406322  | -0.028055 | -2.607354 |
| C  | 4.734524  | -0.624609 | -0.068691 |
| H  | 4.257146  | -1.740107 | -1.883431 |
| O  | 3.749650  | 0.381869  | -0.336700 |
| H  | 5.928935  | -1.991280 | -1.304900 |
| H  | 6.691896  | -0.741314 | 0.869901  |
| C  | 5.121596  | -1.250897 | -1.410052 |
| H  | 1.096954  | 0.529823  | -3.246568 |
| C  | 5.956199  | 0.020768  | 0.569083  |
| H  | 5.469354  | -0.457086 | -2.088064 |
| H  | 6.442648  | 0.693807  | -0.153274 |
| Cu | 0.681519  | 0.693168  | -0.683351 |
| H  | -0.995746 | 1.590413  | -2.524773 |
| H  | 3.777844  | -0.159236 | 2.481159  |
| H  | 5.687948  | 0.615842  | 1.452278  |
| H  | -6.119227 | -0.535626 | 1.429040  |
| H  | -6.819271 | -0.854368 | -0.180933 |
| C  | -6.347580 | -1.331593 | 0.694020  |
| H  | -7.093407 | -2.000394 | 1.141173  |
| N  | -5.181931 | -2.096442 | 0.319083  |
| H  | -4.702808 | -4.146160 | 0.102454  |
| H  | -5.943667 | -3.765430 | 1.307360  |
| C  | -4.998037 | -3.416586 | 0.874669  |
| H  | -4.229590 | -3.441734 | 1.670846  |

63

Figure 2\_para-NMe2\_ts(CuBadd) / electronic energy: -2800.12649875 a.u. / lowest freq: -191.73 cm-1

|   |           |           |           |
|---|-----------|-----------|-----------|
| H | -1.551574 | 1.994754  | 2.672223  |
| H | -0.200802 | 4.242581  | 2.701214  |
| H | 1.905508  | 4.675068  | 1.631952  |
| H | 3.365644  | 3.587764  | -0.362832 |
| C | -1.402513 | 1.921070  | 1.584675  |
| C | -0.233413 | 4.159777  | 1.605332  |
| H | -1.174414 | 0.877306  | 1.332011  |
| N | -0.306042 | 2.764055  | 1.180794  |
| C | 0.523000  | 2.494237  | 0.163758  |
| C | 1.055544  | 4.630811  | 0.928231  |
| N | 1.279673  | 3.577750  | -0.058623 |
| H | 2.390718  | 2.736914  | -1.596977 |
| C | 2.421166  | 3.612158  | -0.934160 |
| H | -2.343839 | 2.202978  | 1.081594  |
| H | -1.120504 | 4.709888  | 1.245231  |
| H | 0.956536  | 5.614340  | 0.446722  |
| H | 2.411123  | 4.524756  | -1.550299 |
| H | -2.966489 | -2.118374 | 1.279676  |
| C | -4.293856 | -0.989585 | -0.019006 |
| C | -3.043752 | -1.491091 | 0.390857  |
| H | -5.233609 | 0.197215  | -1.584699 |
| C | -4.297687 | -0.206187 | -1.195709 |
| H | 2.121481  | -3.603603 | 2.400097  |
| C | -1.872308 | -1.206837 | -0.312281 |
| H | 2.597044  | -1.294161 | 3.071466  |
| H | -0.934148 | -1.616848 | 0.073508  |
| C | -3.125770 | 0.072321  | -1.888153 |

|    |           |           |           |
|----|-----------|-----------|-----------|
| C  | -1.862994 | -0.405428 | -1.475179 |
| C  | 2.758348  | -3.542611 | 1.504790  |
| C  | 3.387472  | -1.260430 | 2.307353  |
| H  | 2.276693  | -4.124531 | 0.708007  |
| O  | 1.686440  | -1.558049 | 0.656242  |
| H  | -3.188149 | 0.688874  | -2.790664 |
| H  | 4.313275  | -1.651976 | 2.753962  |
| H  | 3.726254  | -4.008705 | 1.744685  |
| C  | 2.944944  | -2.088418 | 1.100990  |
| C  | -0.636920 | -0.062985 | -2.190627 |
| B  | 1.927599  | -0.653832 | -0.366579 |
| H  | 0.509849  | -1.823575 | -1.561546 |
| C  | 0.609073  | -0.788441 | -1.924348 |
| C  | 3.854147  | -1.870348 | -0.159048 |
| H  | 2.708780  | -3.256704 | -1.400066 |
| O  | 3.246965  | -0.717078 | -0.771054 |
| H  | 4.250620  | -3.926112 | -0.800316 |
| H  | 5.776714  | -2.395563 | 0.699429  |
| C  | 3.756889  | -3.014729 | -1.167504 |
| H  | 1.351333  | -0.727884 | -2.729973 |
| C  | 5.310928  | -1.564210 | 0.148469  |
| H  | 4.248569  | -2.710013 | -2.103206 |
| H  | 5.867929  | -1.425893 | -0.790316 |
| Cu | 0.603258  | 0.840843  | -0.803408 |
| H  | -0.749360 | 0.429002  | -3.161127 |
| H  | 3.546986  | -0.206575 | 2.034535  |
| H  | 5.416374  | -0.646179 | 0.741438  |
| H  | -6.857765 | 0.076178  | -0.183514 |
| H  | -6.872327 | -1.561352 | -0.890596 |
| C  | -6.733372 | -0.993433 | 0.051692  |
| H  | -7.547647 | -1.267338 | 0.735133  |
| N  | -5.465717 | -1.252418 | 0.691384  |
| H  | -5.154768 | -3.265937 | 1.342722  |
| H  | -6.419124 | -2.337038 | 2.193497  |
| C  | -5.430417 | -2.260750 | 1.722455  |
| H  | -4.713094 | -1.998563 | 2.516830  |

63

Figure 2\_para-NMe2\_L-Cu-alkyl\_01 / electronic energy: -2800.18197688 a.u. / lowest freq: 12.08 cm-1

|    |           |           |           |
|----|-----------|-----------|-----------|
| H  | -0.028887 | 1.982339  | 2.652630  |
| H  | 2.469256  | 2.874769  | 2.768118  |
| H  | 4.338951  | 2.970242  | 1.272695  |
| H  | 4.665374  | 1.639086  | -0.967794 |
| C  | -0.112551 | 2.528145  | 1.697680  |
| C  | 2.246584  | 3.410824  | 1.829686  |
| H  | -0.740475 | 1.943888  | 1.012191  |
| N  | 1.184615  | 2.719297  | 1.101779  |
| C  | 1.607282  | 2.149812  | -0.032312 |
| C  | 3.410127  | 3.363071  | 0.832681  |
| N  | 2.899545  | 2.456551  | -0.193486 |
| H  | 3.177209  | 1.312595  | -1.900948 |
| C  | 3.713991  | 2.070964  | -1.316355 |
| H  | -0.601008 | 3.496388  | 1.892182  |
| H  | 1.944522  | 4.436450  | 2.088708  |
| H  | 3.631440  | 4.349852  | 0.392656  |
| H  | 3.941158  | 2.934363  | -1.964650 |
| H  | -3.666436 | -1.802720 | 1.107518  |
| C  | -4.357864 | -0.014310 | 0.085923  |
| C  | -3.449825 | -1.059845 | 0.338552  |
| H  | -4.668198 | 1.698107  | -1.225112 |
| C  | -4.002545 | 0.879214  | -0.949021 |
| H  | 0.777921  | -3.601718 | 2.649645  |
| C  | -2.253148 | -1.184801 | -0.372156 |
| H  | 0.113249  | -1.289560 | 2.277937  |
| H  | -1.584367 | -2.005737 | -0.106208 |
| C  | -2.806577 | 0.741599  | -1.645032 |
| C  | -1.874207 | -0.285208 | -1.385783 |
| C  | 1.718261  | -3.490432 | 2.089680  |
| C  | 1.095493  | -1.081375 | 1.829057  |
| H  | 1.920825  | -4.440826 | 1.578871  |
| O  | 0.615964  | -2.655661 | 0.110115  |
| H  | -2.581076 | 1.469230  | -2.432504 |
| H  | 1.779510  | -0.762012 | 2.628611  |
| H  | 2.524606  | -3.301593 | 2.814592  |
| C  | 1.596728  | -2.335059 | 1.110248  |
| C  | -0.581359 | -0.347272 | -2.131818 |
| B  | 0.998944  | -2.047978 | -1.063843 |
| H  | -0.709226 | -2.549778 | -2.412437 |
| C  | 0.056142  | -1.757824 | -2.280247 |
| C  | 2.877597  | -2.069923 | 0.235558  |
| H  | 3.033800  | -4.144318 | -0.427966 |
| O  | 2.311156  | -1.638029 | -1.011902 |
| H  | 4.201978  | -3.700062 | 0.848101  |
| H  | 4.164052  | -1.237100 | 1.772644  |
| C  | 3.679956  | -3.338387 | -0.049564 |
| H  | 0.675035  | -1.761812 | -3.193609 |
| C  | 3.792143  | -0.978462 | 0.769497  |
| H  | 4.433597  | -3.119135 | -0.820279 |
| H  | 4.661046  | -0.864116 | 0.104543  |
| Cu | 0.557371  | 0.937086  | -1.132869 |
| H  | -0.760827 | 0.069031  | -3.139685 |
| H  | 0.968131  | -0.250757 | 1.116920  |
| H  | 3.273860  | -0.012382 | 0.820973  |
| H  | -6.157517 | 2.076365  | 0.262121  |
| H  | -6.939137 | 0.773597  | -0.672971 |
| C  | -6.544544 | 1.046647  | 0.327006  |
| H  | -7.387907 | 1.065520  | 1.029657  |
| N  | -5.538552 | 0.134471  | 0.814243  |

|   |           |           |          |
|---|-----------|-----------|----------|
| H | -6.156319 | -1.895319 | 1.091228 |
| H | -6.906658 | -0.677829 | 2.158471 |
| C | -5.973027 | -0.956321 | 1.652247 |
| H | -5.234120 | -1.179697 | 2.438954 |

63

Figure 2\_para-NMe2\_L-Cu-alkyl\_02 / electronic energy: -2800.17645420 a.u. / lowest freq: 21.44 cm-1

|    |           |           |           |
|----|-----------|-----------|-----------|
| B  | -1.676356 | -2.051381 | 0.255057  |
| O  | -2.470196 | -1.866668 | 1.359581  |
| O  | -2.419586 | -2.147310 | -0.896319 |
| C  | -3.846682 | -1.965860 | 0.957721  |
| C  | -3.760645 | -1.727773 | -0.597361 |
| C  | -4.655132 | -0.921550 | 1.712906  |
| C  | -4.324194 | -3.369178 | 1.327129  |
| C  | -3.866429 | -0.251539 | -0.980101 |
| C  | -4.735234 | -2.552107 | -1.424093 |
| H  | -3.167254 | 0.365876  | -0.397647 |
| H  | -4.885639 | 0.134206  | -0.831187 |
| H  | -3.608392 | -0.137329 | -2.043023 |
| H  | -4.581014 | -3.629824 | -1.282446 |
| H  | -4.594468 | -2.328770 | -2.492121 |
| H  | -5.775928 | -2.308389 | -1.161335 |
| H  | -3.757386 | -4.142178 | 0.786978  |
| H  | -5.394033 | -3.505548 | 1.112306  |
| H  | -4.167448 | -3.528569 | 2.404260  |
| H  | -5.697339 | -0.903448 | 1.359652  |
| H  | -4.225116 | 0.081881  | 1.594545  |
| H  | -4.663841 | -1.160913 | 2.786931  |
| C  | -0.485567 | 1.162474  | -1.590393 |
| C  | -1.150067 | 2.380274  | -1.477347 |
| C  | -0.182897 | 0.347021  | -0.484082 |
| C  | -1.564365 | 2.878594  | -0.223524 |
| C  | -0.593367 | 0.859694  | 0.760418  |
| C  | -1.265465 | 2.074674  | 0.894306  |
| C  | 0.500974  | -0.975984 | -0.632536 |
| C  | -0.103889 | -2.080020 | 0.283085  |
| H  | -1.563290 | 2.388497  | 1.895368  |
| H  | -0.401810 | 0.281624  | 1.668503  |
| H  | -1.361010 | 2.938026  | -2.390516 |
| H  | -0.206983 | 0.815887  | -2.591347 |
| Cu | 2.418990  | -0.641341 | -0.324998 |
| H  | 0.241310  | -1.997979 | 1.328618  |
| H  | 0.259566  | -3.065344 | -0.060516 |
| H  | 0.352407  | -1.298267 | -1.679442 |
| H  | 5.791517  | -2.888400 | -0.999615 |
| H  | 7.235666  | -1.176163 | 0.500929  |
| C  | 5.306987  | -1.980570 | -1.394610 |
| H  | 4.256883  | -2.207453 | -1.622318 |
| H  | 6.443023  | 0.421696  | 2.095541  |
| N  | 5.350805  | -0.913564 | -0.429313 |
| C  | 6.625989  | -0.380472 | 0.046137  |
| H  | 5.819980  | -1.691911 | -2.327213 |
| C  | 4.287842  | -0.265145 | 0.058097  |
| C  | 6.179613  | 0.683392  | 1.057218  |
| H  | 4.045176  | 1.393311  | 2.749760  |
| H  | 7.197897  | 0.045930  | -0.794478 |
| N  | 4.727640  | 0.682454  | 0.892613  |
| C  | 3.896429  | 1.563957  | 1.670372  |
| H  | 6.597165  | 1.679327  | 0.844503  |
| H  | 2.843568  | 1.372884  | 1.423804  |
| H  | 4.127550  | 2.619192  | 1.451712  |
| H  | -3.537445 | 4.053905  | -1.796087 |
| H  | -3.275978 | 5.644210  | -1.028079 |
| C  | -2.787880 | 4.696124  | -1.289640 |
| H  | -2.001208 | 4.932026  | -2.023447 |
| N  | -2.236486 | 4.096136  | -0.098121 |
| H  | -3.689926 | 3.627365  | 1.399558  |
| H  | -3.392091 | 5.360747  | 1.087355  |
| C  | -2.910594 | 4.375992  | 1.147714  |
| H  | -2.201072 | 4.414345  | 1.989292  |

63

Figure 2\_para-NMe2\_L-Cu-alkyl\_03 / electronic energy: -2800.17710480 a.u. / lowest freq: -13.53 cm-1

|   |           |           |           |
|---|-----------|-----------|-----------|
| B | -1.929369 | -1.810779 | -0.266173 |
| O | -2.840197 | -2.358973 | -1.137932 |
| O | -2.545338 | -1.272590 | 0.837438  |
| C | -4.160702 | -2.007738 | -0.692289 |
| C | -3.920887 | -1.691935 | 0.829296  |
| C | -5.106659 | -3.168242 | -0.957410 |
| C | -4.594270 | -0.781800 | -1.495100 |
| C | -4.012235 | -2.931898 | 1.717922  |
| C | -4.792716 | -0.581803 | 1.393163  |
| H | -3.400676 | -3.756068 | 1.321497  |
| H | -5.048434 | -3.284687 | 1.821793  |
| H | -3.632096 | -2.681669 | 2.719221  |
| H | -4.630745 | 0.370648  | 0.872786  |
| H | -4.561709 | -0.428514 | 2.457813  |
| H | -5.857795 | -0.847283 | 1.311997  |
| H | -3.930468 | 0.074297  | -1.305074 |
| H | -5.626541 | -0.485288 | -1.258791 |
| H | -4.541485 | -1.018558 | -2.567986 |
| H | -6.098480 | -2.968083 | -0.524551 |
| H | -4.723986 | -4.107200 | -0.536167 |
| H | -5.231973 | -3.310079 | -2.041101 |
| C | 2.813128  | -0.656732 | 1.271017  |
| C | 4.196232  | -0.758739 | 1.183152  |
| C | 1.938170  | -1.116098 | 0.263148  |
| C | 4.821313  | -1.346360 | 0.059587  |
| C | 2.573707  | -1.693037 | -0.849810 |

|    |           |           |           |
|----|-----------|-----------|-----------|
| C  | 3.963943  | -1.794787 | -0.961373 |
| C  | 0.459841  | -0.953663 | 0.394115  |
| C  | -0.382694 | -1.853125 | -0.515569 |
| H  | 4.373635  | -2.247901 | -1.865130 |
| H  | 1.970025  | -2.074560 | -1.677319 |
| H  | 4.794702  | -0.377364 | 2.011562  |
| H  | 2.383280  | -0.187661 | 2.163081  |
| Cu | 0.014475  | 0.956879  | 0.164687  |
| H  | -0.091953 | -2.928294 | -0.437606 |
| H  | -0.230458 | -1.621279 | -1.586296 |
| H  | 0.187971  | -1.157935 | 1.447595  |
| H  | -3.409233 | 2.616440  | -1.047020 |
| H  | -2.160420 | 5.013023  | -1.306927 |
| C  | -2.876640 | 2.564607  | -0.082268 |
| H  | -2.622675 | 1.517289  | 0.131472  |
| H  | 0.133815  | 5.678611  | -1.194454 |
| N  | -1.663997 | 3.339386  | -0.116416 |
| C  | -1.694794 | 4.783777  | -0.334398 |
| H  | -3.553836 | 2.932797  | 0.705384  |
| C  | -0.426971 | 2.835676  | -0.057329 |
| C  | -0.205774 | 5.153756  | -0.288467 |
| H  | 2.345637  | 4.138642  | -1.011926 |
| H  | -2.284715 | 5.283517  | 0.449280  |
| N  | 0.439024  | 3.846670  | -0.176062 |
| C  | 1.872410  | 3.730659  | -0.104148 |
| H  | 0.050230  | 5.780493  | 0.581752  |
| H  | 2.139136  | 2.669675  | -0.010248 |
| H  | 2.269502  | 4.275232  | 0.768756  |
| H  | 6.418291  | -2.815540 | -1.644984 |
| H  | 6.592785  | -1.098005 | -2.093788 |
| C  | 6.790731  | -1.840041 | -1.293014 |
| H  | 7.878739  | -1.934335 | -1.180376 |
| N  | 6.208348  | -1.480114 | -0.023244 |
| H  | 6.892289  | 0.368811  | 0.807664  |
| H  | 8.088700  | -0.950699 | 0.700970  |
| C  | 7.030936  | -0.728464 | 0.893982  |
| H  | 6.830264  | -1.007252 | 1.940825  |

63

Figure 2 para-NMe2\_ts(BHE) / electronic energy: -2800.13027722 a.u. / lowest freq: -940.79 cm<sup>-1</sup>

|    |           |           |           |
|----|-----------|-----------|-----------|
| B  | -2.399371 | -1.248071 | -0.278252 |
| O  | -3.333919 | -1.845078 | -1.079852 |
| O  | -2.952836 | -0.644696 | 0.818737  |
| C  | -4.630874 | -1.400636 | -0.634192 |
| C  | -4.347845 | -0.997017 | 0.860553  |
| C  | -5.636494 | -2.526532 | -0.807116 |
| C  | -5.014802 | -0.208715 | -1.509294 |
| C  | -4.487602 | -2.164255 | 1.835365  |
| C  | -5.147376 | 0.197523  | 1.356062  |
| H  | -3.933638 | -3.049190 | 1.488699  |
| H  | -5.540537 | -2.445055 | 1.981856  |
| H  | -4.072613 | -1.866456 | 2.809439  |
| H  | -4.928279 | 1.102733  | 0.774720  |
| H  | -4.899738 | 0.401979  | 2.408315  |
| H  | -6.227171 | -0.006052 | 1.295752  |
| H  | -4.292787 | 0.615007  | -1.402743 |
| H  | -6.018317 | 0.168774  | -1.266449 |
| H  | -5.011365 | -0.523037 | -2.563379 |
| H  | -6.609518 | -2.244040 | -0.377755 |
| H  | -5.296527 | -3.452736 | -0.325806 |
| H  | -5.785252 | -2.734086 | -1.877067 |
| C  | 2.345986  | -1.354435 | 1.495195  |
| C  | 3.718478  | -1.545550 | 1.397186  |
| C  | 1.492399  | -1.345685 | 0.370136  |
| C  | 4.349036  | -1.764337 | 0.151738  |
| C  | 2.132746  | -1.559759 | -0.868997 |
| C  | 3.509777  | -1.754814 | -0.979028 |
| C  | 0.065675  | -1.070901 | 0.503070  |
| C  | -0.871366 | -1.211565 | -0.595747 |
| H  | 3.927377  | -1.901280 | -1.975905 |
| H  | 1.545654  | -1.546644 | -1.791751 |
| H  | 4.305149  | -1.527368 | 2.316585  |
| H  | 1.912641  | -1.183624 | 2.485828  |
| Cu | -0.207539 | 0.734406  | -0.506988 |
| H  | -0.580402 | -1.869005 | -1.426158 |
| H  | -1.098749 | -0.052016 | -1.609617 |
| H  | -0.334772 | -0.977430 | 1.516654  |
| H  | -2.292309 | 4.357734  | -0.206466 |
| H  | 0.025304  | 5.653647  | -0.082679 |
| C  | -1.792420 | 3.517777  | 0.301068  |
| H  | -2.173942 | 2.575049  | -0.113469 |
| H  | 2.152930  | 4.876964  | -0.868038 |
| N  | -0.370147 | 3.577400  | 0.092102  |
| C  | 0.393717  | 4.767754  | 0.455326  |
| H  | -2.044597 | 3.559566  | 1.374903  |
| C  | 0.407541  | 2.526871  | -0.206107 |
| C  | 1.817547  | 4.370913  | 0.053718  |
| H  | 3.298350  | 2.481936  | -1.453119 |
| H  | 0.299491  | 4.962894  | 1.537552  |
| N  | 1.681960  | 2.935966  | -0.182411 |
| C  | 2.827639  | 2.131536  | -0.518677 |
| H  | 2.559608  | 4.571602  | 0.840546  |
| H  | 2.515631  | 1.087147  | -0.647495 |
| H  | 3.580593  | 2.171662  | 0.284447  |
| H  | 5.935939  | -2.648057 | -1.940755 |
| H  | 6.209151  | -0.897819 | -1.729909 |
| C  | 6.339588  | -1.890107 | -1.250374 |
| H  | 7.416587  | -2.082399 | -1.158134 |

|   |          |           |          |
|---|----------|-----------|----------|
| N | 5.725380 | -1.978289 | 0.052197 |
| H | 6.490675 | -0.601894 | 1.500543 |
| H | 7.599560 | -1.891380 | 0.958317 |
| C | 6.551093 | -1.666651 | 1.194120 |
| H | 6.280413 | -2.280369 | 2.068138 |

63

Figure 2\_para-NMe2\_pc2 / electronic energy: -2800.16816835 a.u. / lowest freq: 25.36 cm-1

|    |           |           |           |
|----|-----------|-----------|-----------|
| B  | -2.482731 | -1.189180 | -0.010090 |
| O  | -3.504937 | -1.834429 | -0.653971 |
| O  | -2.939733 | -0.235351 | 0.872636  |
| C  | -4.711823 | -1.090053 | -0.400494 |
| C  | -4.370581 | -0.354348 | 0.948451  |
| C  | -5.885026 | -2.052717 | -0.321177 |
| C  | -4.897956 | -0.124435 | -1.569167 |
| C  | -4.688768 | -1.194891 | 2.183988  |
| C  | -4.976113 | 1.033177  | 1.089346  |
| H  | -4.261755 | -2.205626 | 2.102016  |
| H  | -5.772568 | -1.285044 | 2.345896  |
| H  | -4.248187 | -0.712991 | 3.069276  |
| H  | -4.638094 | 1.709238  | 0.293226  |
| H  | -4.679924 | 1.471267  | 2.054186  |
| H  | -6.075230 | 0.982266  | 1.063563  |
| H  | -4.061269 | 0.586403  | -1.640239 |
| H  | -5.838747 | 0.438078  | -1.482417 |
| H  | -4.925558 | -0.698663 | -2.506905 |
| H  | -6.805087 | -1.519997 | -0.036899 |
| H  | -5.706514 | -2.856692 | 0.404990  |
| H  | -6.051551 | -2.516662 | -1.304758 |
| C  | 2.282675  | -0.289449 | 1.324924  |
| C  | 3.664450  | -0.424677 | 1.303681  |
| C  | 1.442456  | -1.044653 | 0.493383  |
| C  | 4.291503  | -1.345572 | 0.429150  |
| C  | 2.064619  | -1.956633 | -0.371541 |
| C  | 3.444384  | -2.111323 | -0.408290 |
| C  | -0.014236 | -0.814123 | 0.526768  |
| C  | -0.978746 | -1.464882 | -0.232206 |
| H  | 3.865740  | -2.837889 | -1.102686 |
| H  | 1.458144  | -2.567718 | -1.044570 |
| H  | 4.260155  | 0.192654  | 1.975934  |
| H  | 1.836753  | 0.441954  | 2.006022  |
| Cu | -0.562650 | 0.368305  | -1.144502 |
| H  | -0.681768 | -2.248462 | -0.937663 |
| H  | -1.378507 | 0.349308  | -2.520914 |
| H  | -0.355807 | -0.192322 | 1.362724  |
| H  | -1.660359 | 3.766209  | 0.684200  |
| H  | 0.844834  | 4.796376  | 0.217981  |
| C  | -1.101553 | 2.878916  | 1.028891  |
| H  | -1.683230 | 1.977205  | 0.790731  |
| H  | 2.858006  | 4.034538  | -0.844578 |
| N  | 0.190361  | 2.795578  | 0.397657  |
| C  | 1.204650  | 3.827305  | 0.605728  |
| H  | -0.989990 | 2.945340  | 2.122763  |
| C  | 0.512544  | 1.938671  | -0.578072 |
| C  | 2.385168  | 3.278360  | -0.201107 |
| H  | 3.013757  | 2.069815  | -2.659403 |
| H  | 1.430977  | 3.950912  | 1.674911  |
| N  | 1.748117  | 2.230728  | -0.995513 |
| C  | 2.512295  | 1.429788  | -1.916546 |
| H  | 3.167015  | 2.837021  | 0.441972  |
| H  | 1.832788  | 0.745438  | -2.441569 |
| H  | 3.279239  | 0.835871  | -1.389845 |
| H  | 5.925807  | -3.476271 | -0.298594 |
| H  | 6.038954  | -2.223564 | -1.563734 |
| C  | 6.261241  | -2.444276 | -0.504261 |
| H  | 7.350453  | -2.419852 | -0.380429 |
| N  | 5.657017  | -1.486518 | 0.392161  |
| H  | 6.344568  | 0.408211  | 1.054944  |
| H  | 7.544500  | -0.901155 | 1.052449  |
| C  | 6.489815  | -0.670521 | 1.243990  |
| H  | 6.295869  | -0.852407 | 2.316328  |

63

Figure 2\_para-NMe2\_ts(H&gt;B) / electronic energy: -2800.15510862 a.u. / lowest freq: -383.35 cm-1

|   |           |           |           |
|---|-----------|-----------|-----------|
| B | -2.469004 | -0.851366 | -0.356664 |
| O | -3.516283 | -1.653883 | -0.846044 |
| O | -2.950072 | -0.042072 | 0.707329  |
| C | -4.740499 | -1.080589 | -0.395594 |
| C | -4.309487 | -0.388326 | 0.952736  |
| C | -5.773368 | -2.187859 | -0.231231 |
| C | -5.230787 | -0.076851 | -1.442649 |
| C | -4.330606 | -1.353968 | 2.140819  |
| C | -5.097499 | 0.868315  | 1.297905  |
| H | -3.785430 | -2.280561 | 1.907095  |
| H | -5.354937 | -1.615897 | 2.445859  |
| H | -3.830075 | -0.876169 | 2.996563  |
| H | -4.982931 | 1.642206  | 0.527181  |
| H | -4.734699 | 1.286184  | 2.249685  |
| H | -6.169358 | 0.644977  | 1.414948  |
| H | -4.524441 | 0.756274  | -1.564521 |
| H | -6.217930 | 0.334033  | -1.184179 |
| H | -5.315949 | -0.588753 | -2.413208 |
| H | -6.697831 | -1.799730 | 0.223771  |
| H | -5.391655 | -3.007050 | 0.392475  |
| H | -6.030621 | -2.607593 | -1.215620 |
| C | 2.261540  | -0.346932 | 1.310874  |
| C | 3.645732  | -0.462397 | 1.269337  |
| C | 1.419046  | -1.134759 | 0.513965  |
| C | 4.271753  | -1.397177 | 0.410333  |



|    |           |           |           |
|----|-----------|-----------|-----------|
| C  | 2.040620  | -2.068920 | -0.327915 |
| C  | 3.421391  | -2.204883 | -0.384579 |
| C  | -0.036076 | -0.897444 | 0.542421  |
| C  | -0.982338 | -1.392492 | -0.310112 |
| H  | 3.841132  | -2.950970 | -1.059130 |
| H  | 1.430151  | -2.714281 | -0.965020 |
| H  | 4.243234  | 0.181391  | 1.914650  |
| H  | 1.816381  | 0.397871  | 1.978004  |
| Cu | -0.802902 | 0.634145  | -1.033245 |
| H  | -0.655522 | -2.055582 | -1.123940 |
| H  | -2.243977 | 0.248474  | -1.650177 |
| H  | -0.378870 | -0.272676 | 1.377948  |
| H  | -1.161140 | 4.044360  | 1.089814  |
| H  | 1.458878  | 4.674228  | 0.486102  |
| C  | -0.757935 | 3.025739  | 1.219350  |
| H  | -1.520285 | 2.296751  | 0.910880  |
| H  | 3.104192  | 3.744036  | -0.979327 |
| N  | 0.430661  | 2.827446  | 0.430787  |
| C  | 1.644217  | 3.603438  | 0.673223  |
| H  | -0.541473 | 2.872589  | 2.289035  |
| C  | 0.530497  | 2.001365  | -0.616232 |
| C  | 2.628554  | 2.991617  | -0.332241 |
| H  | 2.806185  | 1.815491  | -2.915484 |
| H  | 1.973811  | 3.494806  | 1.717983  |
| N  | 1.769632  | 2.100920  | -1.108724 |
| C  | 2.329288  | 1.232892  | -2.110967 |
| H  | 3.427267  | 2.408252  | 0.156731  |
| H  | 1.527164  | 0.620470  | -2.543485 |
| H  | 3.085197  | 0.560134  | -1.670057 |
| H  | 5.990270  | -2.252411 | -1.612914 |
| H  | 7.335939  | -2.406871 | -0.462297 |
| C  | 6.244912  | -2.460908 | -0.557907 |
| H  | 5.943588  | -3.500218 | -0.337818 |
| H  | 6.308160  | 0.416160  | 0.928781  |
| N  | 5.639114  | -1.514139 | 0.348826  |
| H  | 7.527241  | -0.876629 | 0.957116  |
| C  | 6.472113  | -0.653289 | 1.154790  |
| H  | 6.296104  | -0.798039 | 2.235522  |

63

Figure 2 para-NMe2\_int1 / electronic energy: -2800.15704127 a.u. / lowest freq: 23.81 cm-1

|    |           |           |           |
|----|-----------|-----------|-----------|
| B  | -2.570648 | -0.395195 | -0.420380 |
| O  | -3.569660 | -1.094475 | -1.184665 |
| O  | -3.144713 | -0.092360 | 0.874060  |
| C  | -4.815596 | -0.881274 | -0.546227 |
| C  | -4.393433 | -0.752398 | 0.962848  |
| C  | -5.737210 | -2.056338 | -0.848291 |
| C  | -5.442690 | 0.411682  | -1.082132 |
| C  | -4.172948 | -2.121719 | 1.617297  |
| C  | -5.343476 | 0.076295  | 1.819113  |
| H  | -3.526063 | -2.755585 | 0.992360  |
| H  | -5.117093 | -2.656950 | 1.802490  |
| H  | -3.667279 | -1.974781 | 2.583949  |
| H  | -5.412992 | 1.110820  | 1.456149  |
| H  | -4.978317 | 0.109398  | 2.857530  |
| H  | -6.354548 | -0.360617 | 1.830673  |
| H  | -4.829424 | 1.289473  | -0.830283 |
| H  | -6.458135 | 0.573434  | -0.689507 |
| H  | -5.506083 | 0.347869  | -2.179273 |
| H  | -6.675344 | -1.985816 | -0.275336 |
| H  | -5.253963 | -3.014840 | -0.615899 |
| H  | -5.995332 | -2.064193 | -1.918798 |
| C  | 2.164556  | -0.509498 | 1.304883  |
| C  | 3.537029  | -0.715896 | 1.236339  |
| C  | 1.260685  | -1.208806 | 0.492702  |
| C  | 4.086079  | -1.664197 | 0.339802  |
| C  | 1.803950  | -2.159434 | -0.383080 |
| C  | 3.171865  | -2.388740 | -0.464007 |
| C  | -0.172931 | -0.862017 | 0.534508  |
| C  | -1.100026 | -1.052161 | -0.440448 |
| H  | 3.530753  | -3.143813 | -1.163085 |
| H  | 1.139165  | -2.745015 | -1.023828 |
| H  | 4.184140  | -0.132666 | 1.891091  |
| H  | 1.780656  | 0.242700  | 2.001191  |
| Cu | -0.828695 | 1.113085  | -0.715154 |
| H  | -0.762111 | -1.534822 | -1.371342 |
| H  | -2.420567 | 0.868756  | -1.068909 |
| H  | -0.502017 | -0.380099 | 1.465983  |
| H  | -0.133881 | 4.658914  | 1.337061  |
| H  | 2.397253  | 4.638390  | 0.362423  |
| C  | -0.003241 | 3.569295  | 1.446336  |
| H  | -0.961656 | 3.075579  | 1.237437  |
| H  | 3.567761  | 3.336939  | -1.267891 |
| N  | 0.988757  | 3.071400  | 0.530140  |
| C  | 2.366408  | 3.556570  | 0.573168  |
| H  | 0.284074  | 3.357038  | 2.488901  |
| C  | 0.760708  | 2.213513  | -0.469133 |
| C  | 3.042196  | 2.721846  | -0.521964 |
| H  | 2.529382  | 1.522866  | -3.071368 |
| H  | 2.805703  | 3.393323  | 1.569299  |
| N  | 1.910662  | 2.021255  | -1.123671 |
| C  | 2.116830  | 1.049702  | -2.165667 |
| H  | 3.760023  | 1.988828  | -0.116260 |
| H  | 1.153935  | 0.583205  | -2.414029 |
| H  | 2.814294  | 0.263005  | -1.832379 |
| H  | 5.736054  | -2.566240 | -1.733197 |
| H  | 7.061180  | -2.875755 | -0.587485 |
| C  | 5.969847  | -2.831697 | -0.685747 |

|   |          |           |           |
|---|----------|-----------|-----------|
| H | 5.579656 | -3.848183 | -0.503316 |
| H | 6.241542 | 0.004514  | 0.846876  |
| N | 5.441775 | -1.872385 | 0.255747  |
| H | 7.377523 | -1.361494 | 0.834547  |
| C | 6.342227 | -1.076358 | 1.055864  |
| H | 6.178768 | -1.225101 | 2.137946  |

63

Figure 2\_para-NMe2\_ts(Cu&gt;O) / electronic energy: -2800.15146860 a.u. / lowest freq: -49.96 cm-1

|    |           |           |           |
|----|-----------|-----------|-----------|
| B  | -1.835064 | -1.329527 | -0.712392 |
| O  | -2.723358 | -2.405153 | -1.038545 |
| O  | -2.284635 | -0.788004 | 0.574009  |
| C  | -3.937152 | -2.178779 | -0.342243 |
| C  | -3.444867 | -1.494570 | 0.989274  |
| C  | -4.645576 | -3.512167 | -0.136297 |
| C  | -4.835820 | -1.254598 | -1.174665 |
| C  | -3.003669 | -2.516468 | 2.040385  |
| C  | -4.441617 | -0.520171 | 1.604534  |
| H  | -2.297817 | -3.241174 | 1.608344  |
| H  | -3.853290 | -3.064985 | 2.474903  |
| H  | -2.485768 | -1.988113 | 2.855496  |
| H  | -4.678249 | 0.302952  | 0.916762  |
| H  | -4.018050 | -0.081008 | 2.521050  |
| H  | -5.380608 | -1.028106 | 1.875291  |
| H  | -4.386350 | -0.259712 | -1.304600 |
| H  | -5.830037 | -1.129475 | -0.720315 |
| H  | -4.967891 | -1.696229 | -2.174134 |
| H  | -5.528925 | -3.396348 | 0.510894  |
| H  | -3.975223 | -4.257358 | 0.312133  |
| H  | -4.986373 | -3.908365 | -1.105334 |
| C  | 2.779002  | -0.887385 | 1.320885  |
| C  | 4.166930  | -0.802224 | 1.347559  |
| C  | 2.066660  | -1.221689 | 0.159817  |
| C  | 4.932478  | -1.050185 | 0.184551  |
| C  | 2.831473  | -1.472239 | -0.991152 |
| C  | 4.217425  | -1.392942 | -0.989710 |
| C  | 0.593441  | -1.244035 | 0.182585  |
| C  | -0.254733 | -1.563011 | -0.813807 |
| H  | 4.749722  | -1.596247 | -1.918973 |
| H  | 2.330551  | -1.727382 | -1.928701 |
| H  | 4.656117  | -0.540839 | 2.285849  |
| H  | 2.224867  | -0.681824 | 2.242095  |
| Cu | -1.526199 | 0.923531  | -0.843576 |
| H  | 0.167230  | -1.877690 | -1.780147 |
| H  | -2.084921 | -0.354047 | -1.705795 |
| H  | 0.149957  | -0.923556 | 1.134489  |
| H  | -3.348453 | 4.414141  | 0.231038  |
| H  | 1.998733  | 2.756709  | -1.929937 |
| H  | 1.226250  | 4.974620  | -0.628544 |
| H  | -0.933001 | 5.645822  | 0.146265  |
| H  | -3.248265 | 2.636956  | 0.427650  |
| H  | 1.057646  | 1.288011  | -1.523896 |
| C  | -0.785891 | 2.628137  | -0.314169 |
| C  | -2.803426 | 3.594321  | 0.728102  |
| N  | -1.412972 | 3.598027  | 0.357228  |
| C  | 1.513106  | 2.198480  | -1.113347 |
| N  | 0.486358  | 2.995614  | -0.492142 |
| C  | 0.806042  | 4.284123  | 0.118816  |
| C  | -0.556377 | 4.743938  | 0.655537  |
| H  | -2.919159 | 3.711994  | 1.817672  |
| H  | 2.285407  | 1.907705  | -0.381957 |
| H  | 1.555726  | 4.151410  | 0.915820  |
| H  | -0.544387 | 4.946362  | 1.737601  |
| H  | 6.784129  | -0.593294 | -1.843807 |
| H  | 8.124330  | -1.123458 | -0.808339 |
| C  | 7.054350  | -1.259916 | -1.005904 |
| H  | 6.904890  | -2.301390 | -1.344168 |
| N  | 6.304069  | -0.957407 | 0.190309  |
| H  | 8.077062  | -0.587184 | 1.219685  |
| H  | 6.688515  | 0.338476  | 1.824161  |
| C  | 6.999191  | -0.638948 | 1.414941  |
| H  | 6.836679  | -1.398551 | 2.201485  |

63

Figure 2\_para-NMe2\_int2 / electronic energy: -2800.15550685 a.u. / lowest freq: 11.28 cm-1

|   |           |           |           |
|---|-----------|-----------|-----------|
| B | 0.501602  | 1.212973  | -0.830967 |
| O | 0.850698  | 2.578275  | -1.146188 |
| O | 1.051412  | 0.967415  | 0.527350  |
| C | 1.861574  | 3.016960  | -0.263188 |
| C | 1.563527  | 2.190698  | 1.042767  |
| C | 1.741127  | 4.526176  | -0.082006 |
| C | 3.239790  | 2.698373  | -0.860418 |
| C | 0.468524  | 2.830902  | 1.899455  |
| C | 2.787497  | 1.901731  | 1.901758  |
| H | -0.414837 | 3.077868  | 1.292798  |
| H | 0.819046  | 3.745297  | 2.401522  |
| H | 0.156920  | 2.113931  | 2.674000  |
| H | 3.514485  | 1.278615  | 1.363006  |
| H | 2.491363  | 1.362133  | 2.814340  |
| H | 3.283939  | 2.835266  | 2.209225  |
| H | 3.403623  | 1.613787  | -0.971818 |
| H | 4.060084  | 3.104037  | -0.249655 |
| H | 3.303169  | 3.144854  | -1.864061 |
| H | 2.434618  | 4.893365  | 0.690832  |
| H | 0.718339  | 4.814430  | 0.194289  |
| H | 1.987367  | 5.035215  | -1.026392 |
| C | -3.913824 | -0.334450 | 1.123987  |
| C | -5.264597 | -0.664509 | 1.153439  |
| C | -3.244288 | -0.001143 | -0.062774 |

|    |           |           |           |
|----|-----------|-----------|-----------|
| C  | -6.034391 | -0.681709 | -0.032475 |
| C  | -4.010322 | -0.032306 | -1.239608 |
| C  | -5.359450 | -0.361614 | -1.236094 |
| C  | -1.814219 | 0.362925  | -0.024021 |
| C  | -1.048067 | 0.852750  | -1.013512 |
| H  | -5.894217 | -0.369977 | -2.186070 |
| H  | -3.538682 | 0.202529  | -2.197622 |
| H  | -5.721831 | -0.907401 | 2.112624  |
| H  | -3.356939 | -0.329574 | 2.066354  |
| Cu | 2.189279  | -0.451317 | -0.732872 |
| H  | -1.508383 | 1.012346  | -2.000558 |
| H  | 1.139098  | 0.385554  | -1.719046 |
| H  | -1.337414 | 0.221496  | 0.955531  |
| H  | 3.089135  | -1.654588 | 3.053319  |
| H  | 5.238847  | -2.973614 | 2.151692  |
| C  | 2.590517  | -1.988150 | 2.129472  |
| H  | 1.897725  | -1.203504 | 1.796702  |
| H  | 6.382351  | -2.632268 | 0.074782  |
| N  | 3.560890  | -2.231346 | 1.092078  |
| C  | 4.624413  | -3.217530 | 1.272315  |
| H  | 2.016816  | -2.902690 | 2.356040  |
| C  | 3.504324  | -1.741872 | -0.151074 |
| C  | 5.395459  | -3.109011 | -0.048547 |
| H  | 5.832059  | -1.391025 | -2.253812 |
| H  | 4.188308  | -4.218541 | 1.427971  |
| N  | 4.522526  | -2.252389 | -0.849318 |
| C  | 4.860875  | -1.911434 | -2.206319 |
| H  | 5.546993  | -4.081701 | -0.539481 |
| H  | 4.083272  | -1.248331 | -2.608090 |
| H  | 4.920771  | -2.815491 | -2.833272 |
| H  | -7.738560 | -1.747876 | -1.972859 |
| H  | -9.170104 | -1.262330 | -1.039198 |
| C  | -8.125491 | -1.005202 | -1.251843 |
| H  | -8.120378 | -0.020194 | -1.751823 |
| H  | -7.599241 | -2.207407 | 1.710201  |
| N  | -7.373495 | -0.994874 | -0.019596 |
| H  | -9.090465 | -1.510642 | 1.040665  |
| C  | -8.028414 | -1.310798 | 1.227228  |
| H  | -7.968104 | -0.480228 | 1.953281  |

63

Figure 2 para-NMe2\_ts(C-Brot) / electronic energy: -2800.15035858 a.u. / lowest freq: -85.14 cm<sup>-1</sup>

|    |           |           |           |
|----|-----------|-----------|-----------|
| B  | 0.412849  | 0.837493  | -0.808667 |
| O  | 0.529683  | 2.205182  | -1.249875 |
| O  | 1.063944  | 0.819746  | 0.538237  |
| C  | 1.563609  | 2.843634  | -0.530598 |
| C  | 1.493930  | 2.135039  | 0.872580  |
| C  | 1.285049  | 4.341997  | -0.482789 |
| C  | 2.906527  | 2.613722  | -1.238420 |
| C  | 0.440145  | 2.758968  | 1.789956  |
| C  | 2.824597  | 2.059635  | 1.612245  |
| H  | -0.511933 | 2.906412  | 1.261649  |
| H  | 0.767284  | 3.729098  | 2.193737  |
| H  | 0.256850  | 2.077911  | 2.634581  |
| H  | 3.559314  | 1.460439  | 1.056870  |
| H  | 2.683393  | 1.588819  | 2.597376  |
| H  | 3.244436  | 3.064437  | 1.775694  |
| H  | 3.195117  | 1.549533  | -1.245744 |
| H  | 3.724426  | 3.181286  | -0.770055 |
| H  | 2.814424  | 2.936373  | -2.286280 |
| H  | 1.993612  | 4.858115  | 0.183806  |
| H  | 0.263175  | 4.547297  | -0.137354 |
| H  | 1.390959  | 4.775444  | -1.489206 |
| C  | -4.438789 | 0.778068  | 0.712684  |
| C  | -5.753881 | 0.336095  | 0.806003  |
| C  | -3.512370 | 0.207459  | -0.172771 |
| C  | -6.224551 | -0.720628 | -0.006965 |
| C  | -3.985542 | -0.839464 | -0.980735 |
| C  | -5.294550 | -1.296607 | -0.907219 |
| C  | -2.125118 | 0.710274  | -0.211407 |
| C  | -1.071634 | 0.209144  | -0.877858 |
| H  | -5.597167 | -2.112402 | -1.563971 |
| H  | -3.311918 | -1.315869 | -1.698067 |
| H  | -6.419056 | 0.824226  | 1.518248  |
| H  | -4.116654 | 1.599381  | 1.360520  |
| Cu | 2.327724  | -0.539832 | -0.626273 |
| H  | -1.239858 | -0.696128 | -1.480389 |
| H  | 1.139448  | 0.035238  | -1.645838 |
| H  | -1.965309 | 1.602562  | 0.408227  |
| H  | 3.444413  | -1.381257 | 3.200129  |
| H  | 5.750776  | -2.369312 | 2.338159  |
| C  | 2.983209  | -1.824933 | 2.303490  |
| H  | 2.191988  | -1.153402 | 1.943628  |
| H  | 6.818961  | -1.992413 | 0.228016  |
| N  | 3.965983  | -1.992361 | 1.262886  |
| C  | 5.181704  | -2.771684 | 1.486915  |
| H  | 2.533989  | -2.791443 | 2.587188  |
| C  | 3.830078  | -1.580250 | -0.001710 |
| C  | 5.916096  | -2.620846 | 0.148816  |
| H  | 6.038803  | -0.916873 | -2.128974 |
| H  | 4.926076  | -3.820177 | 1.713653  |
| N  | 4.914859  | -1.957788 | -0.684664 |
| C  | 5.197078  | -1.626292 | -2.056789 |
| H  | 6.212353  | -3.585130 | -0.290153 |
| H  | 4.305187  | -1.164452 | -2.500457 |
| H  | 5.454865  | -2.530772 | -2.630381 |
| H  | -7.418405 | -3.199383 | -0.545720 |
| H  | -9.029305 | -2.448065 | -0.582182 |

|   |           |           |           |
|---|-----------|-----------|-----------|
| C | -7.963320 | -2.261669 | -0.760181 |
| H | -7.839965 | -2.041246 | -1.834935 |
| N | -7.523156 | -1.165712 | 0.070470  |
| H | -9.403618 | -1.077805 | 0.961701  |
| H | -8.064929 | -0.723083 | 2.076796  |
| C | -8.424777 | -0.589903 | 1.040194  |
| H | -8.577743 | 0.491351  | 0.874609  |

63

Figure 2\_para-NMe2\_int3 / electronic energy: -2800.15493149 a.u. / lowest freq: 16.63 cm-1

|    |           |           |           |
|----|-----------|-----------|-----------|
| B  | 0.326870  | 0.592902  | -0.417959 |
| O  | 0.313060  | 1.908467  | -1.009758 |
| O  | 1.169005  | 0.729432  | 0.816162  |
| C  | 1.295890  | 2.719687  | -0.404292 |
| C  | 1.407515  | 2.113458  | 1.043087  |
| C  | 0.831538  | 4.171672  | -0.431210 |
| C  | 2.606830  | 2.600329  | -1.193491 |
| C  | 0.307579  | 2.628695  | 1.974773  |
| C  | 2.768440  | 2.288696  | 1.703657  |
| H  | -0.681899 | 2.535295  | 1.504227  |
| H  | 0.466315  | 3.678737  | 2.262705  |
| H  | 0.302298  | 2.018982  | 2.891077  |
| H  | 3.559224  | 1.777469  | 1.137208  |
| H  | 2.752050  | 1.861504  | 2.718176  |
| H  | 3.031229  | 3.354311  | 1.791553  |
| H  | 3.021249  | 1.578424  | -1.151234 |
| H  | 3.378430  | 3.295473  | -0.830100 |
| H  | 2.404738  | 2.828687  | -2.250613 |
| H  | 1.514963  | 4.820591  | 0.138587  |
| H  | -0.179221 | 4.275123  | -0.014214 |
| H  | 0.804784  | 4.536411  | -1.469462 |
| C  | -4.741039 | 0.891201  | -0.692516 |
| C  | -6.064190 | 0.486895  | -0.549833 |
| C  | -3.658808 | 0.079096  | -0.322224 |
| C  | -6.382369 | -0.782777 | -0.015418 |
| C  | -3.980365 | -1.182776 | 0.203890  |
| C  | -5.293050 | -1.609346 | 0.355013  |
| C  | -2.277405 | 0.569669  | -0.495029 |
| C  | -1.124687 | -0.048857 | -0.188054 |
| H  | -5.470542 | -2.602051 | 0.768622  |
| H  | -3.180177 | -1.863047 | 0.507473  |
| H  | -6.853214 | 1.172113  | -0.859569 |
| H  | -4.540576 | 1.882213  | -1.111471 |
| Cu | 2.400526  | -0.559612 | -0.377242 |
| H  | -1.176152 | -1.058041 | 0.249479  |
| H  | 0.955554  | -0.290047 | -1.229125 |
| H  | -2.204494 | 1.574857  | -0.932288 |
| H  | 4.624786  | -0.910899 | 2.974288  |
| H  | 6.699331  | -1.766370 | 1.524655  |
| C  | 4.006705  | -1.552298 | 2.324759  |
| H  | 3.033087  | -1.067984 | 2.173149  |
| H  | 7.100880  | -1.686527 | -0.830483 |
| N  | 4.640215  | -1.744287 | 1.045831  |
| C  | 5.966399  | -2.350061 | 0.945945  |
| H  | 3.851769  | -2.516646 | 2.836094  |
| C  | 4.118515  | -1.410150 | -0.138713 |
| C  | 6.233986  | -2.312656 | -0.565029 |
| H  | 5.579769  | -0.812266 | -2.894967 |
| H  | 5.952439  | -3.373603 | 1.352802  |
| N  | 5.002700  | -1.725243 | -1.089547 |
| C  | 4.827185  | -1.516314 | -2.502913 |
| H  | 6.395401  | -3.313113 | -0.996161 |
| H  | 3.825939  | -1.100557 | -2.676922 |
| H  | 4.921018  | -2.467114 | -3.052400 |
| H  | -7.540735 | -2.679728 | 1.646473  |
| H  | -9.053280 | -2.657088 | 0.720177  |
| H  | -9.723367 | -0.849404 | -0.115601 |
| H  | -8.782107 | 0.616615  | 0.227630  |
| C  | -7.967914 | -2.520454 | 0.641027  |
| C  | -8.766186 | -0.349707 | -0.306636 |
| N  | -7.685117 | -1.197076 | 0.137622  |
| H  | -7.575789 | -3.315426 | -0.019903 |
| H  | -8.711831 | -0.133635 | -1.389395 |

44

Figure 2\_para-NMe2-alkenylBpin / electronic energy: -853.456934437 a.u. / lowest freq: 23.23 cm-1

|   |           |           |           |
|---|-----------|-----------|-----------|
| B | -2.187170 | -0.365211 | 0.009480  |
| O | -3.150062 | -1.308190 | 0.256850  |
| O | -2.719971 | 0.871376  | -0.253825 |
| C | -4.429772 | -0.720739 | -0.045141 |
| C | -4.122547 | 0.819094  | 0.064576  |
| C | -5.461729 | -1.234491 | 0.945780  |
| C | -4.799537 | -1.155667 | -1.462554 |
| C | -4.280376 | 1.361085  | 1.484676  |
| C | -4.893795 | 1.689895  | -0.914167 |
| H | -3.742396 | 0.739095  | 2.215571  |
| H | -5.337156 | 1.416990  | 1.783044  |
| H | -3.856508 | 2.375071  | 1.528609  |
| H | -4.661526 | 1.436198  | -1.956775 |
| H | -4.636808 | 2.747934  | -0.756642 |
| H | -5.977402 | 1.578257  | -0.758380 |
| H | -4.071062 | -0.786727 | -2.199959 |
| H | -5.798937 | -0.798203 | -1.749417 |
| H | -4.801313 | -2.254633 | -1.510976 |
| H | -6.427272 | -0.727499 | 0.798153  |
| H | -5.140704 | -1.082014 | 1.984379  |
| H | -5.619453 | -2.312545 | 0.794328  |
| C | 2.524789  | 1.319156  | -0.116960 |
| C | 3.911059  | 1.255250  | -0.091630 |

|   |           |           |           |
|---|-----------|-----------|-----------|
| C | 1.719306  | 0.170822  | -0.054482 |
| C | 4.579018  | 0.009600  | -0.003909 |
| C | 2.385000  | -1.064718 | 0.028476  |
| C | 3.767329  | -1.153399 | 0.052138  |
| C | 0.259119  | 0.304712  | -0.075142 |
| C | -0.668799 | -0.668118 | 0.038170  |
| H | 4.224495  | -2.140270 | 0.117856  |
| H | 1.807980  | -1.991876 | 0.074166  |
| H | 4.477072  | 2.184934  | -0.144841 |
| H | 2.045955  | 2.300298  | -0.188373 |
| H | -0.341817 | -1.706766 | 0.171089  |
| H | -0.096635 | 1.336458  | -0.193713 |
| H | 6.587387  | 1.699032  | -0.957837 |
| H | 6.513293  | 1.810645  | 0.822063  |
| C | 6.741153  | 1.134989  | -0.020836 |
| H | 7.804145  | 0.873333  | 0.040392  |
| N | 5.945699  | -0.071055 | 0.023558  |
| H | 6.334805  | -1.911285 | 1.011367  |
| H | 7.683963  | -1.215909 | 0.088537  |
| C | 6.597253  | -1.359645 | 0.091378  |
| H | 6.341286  | -1.999507 | -0.771386 |

63

Figure 2\_para-NMe2\_pc2\_rev / electronic energy: -2800.16441697 a.u. / lowest freq: 18.93 cm-1

|    |           |           |           |
|----|-----------|-----------|-----------|
| B  | -1.404452 | 1.193477  | 0.493136  |
| O  | -2.307444 | 1.083008  | 1.521247  |
| O  | -1.936369 | 1.825644  | -0.603843 |
| C  | -3.594291 | 1.493963  | 1.027891  |
| C  | -3.209140 | 2.374520  | -0.221238 |
| C  | -4.332963 | 2.241061  | 2.127228  |
| C  | -4.357294 | 0.225974  | 0.649657  |
| C  | -2.975245 | 3.842614  | 0.131380  |
| C  | -4.170665 | 2.265215  | -1.393828 |
| H  | -2.284103 | 3.947149  | 0.981047  |
| H  | -3.915241 | 4.356339  | 0.379305  |
| H  | -2.524692 | 4.349718  | -0.734510 |
| H  | -4.222784 | 1.238849  | -1.780338 |
| H  | -3.834067 | 2.917806  | -2.212906 |
| H  | -5.181988 | 2.584143  | -1.099352 |
| H  | -3.843452 | -0.315313 | -0.155866 |
| H  | -5.384955 | 0.449043  | 0.328929  |
| H  | -4.406220 | -0.436150 | 1.527000  |
| H  | -5.281161 | 2.651512  | 1.748157  |
| H  | -3.731919 | 3.064745  | 2.533776  |
| H  | -4.566743 | 1.552359  | 2.952792  |
| C  | 3.400701  | 1.402724  | -0.992957 |
| C  | 4.772922  | 1.226763  | -0.864913 |
| C  | 2.480845  | 0.734450  | -0.174083 |
| C  | 5.307393  | 0.345012  | 0.103798  |
| C  | 3.011769  | -0.135247 | 0.789950  |
| C  | 4.379016  | -0.331925 | 0.932053  |
| C  | 1.030785  | 0.961261  | -0.354592 |
| C  | 0.045606  | 0.675451  | 0.588515  |
| H  | 4.726377  | -1.026998 | 1.696237  |
| H  | 2.340991  | -0.693594 | 1.448507  |
| H  | 5.431352  | 1.781206  | -1.533094 |
| H  | 3.029363  | 2.086632  | -1.761767 |
| Cu | 0.023667  | -0.785448 | -0.889842 |
| H  | 0.344697  | 0.200152  | 1.530463  |
| H  | 0.790510  | -1.130110 | -2.263021 |
| H  | 0.776678  | 1.646068  | -1.172115 |
| H  | 7.481506  | 1.975649  | -0.479767 |
| H  | 8.607599  | 0.607481  | -0.359855 |
| C  | 7.576706  | 0.883023  | -0.612338 |
| H  | 7.423422  | 0.660762  | -1.683609 |
| N  | 6.661996  | 0.152504  | 0.232990  |
| H  | 6.920989  | -0.483534 | 2.245410  |
| H  | 8.263625  | -0.829304 | 1.133561  |
| C  | 7.170731  | -0.780448 | 1.210495  |
| H  | 6.779883  | -1.801160 | 1.051443  |
| H  | -4.486942 | -2.792274 | -0.421683 |
| H  | -3.792921 | -1.125413 | -2.407872 |
| H  | -3.383037 | -3.076137 | 1.681948  |
| C  | -3.470767 | -3.205211 | -0.518279 |
| C  | -2.825311 | -1.653639 | -2.400037 |
| H  | -1.005054 | -2.245043 | 2.674061  |
| N  | -2.564753 | -2.218380 | -1.101854 |
| C  | -2.810608 | -3.490806 | 0.835191  |
| H  | -2.027381 | -0.942461 | -2.648178 |
| C  | -1.448412 | -2.036211 | -0.387336 |
| N  | -1.531630 | -2.794671 | 0.709211  |
| H  | -3.524788 | -4.099291 | -1.161764 |
| H  | -2.853805 | -2.438479 | -3.174465 |
| C  | -0.592882 | -2.777139 | 1.799559  |
| H  | -2.657771 | -4.564275 | 1.021285  |
| H  | 0.323228  | -2.269246 | 1.473239  |
| H  | -0.337461 | -3.804044 | 2.104386  |

63

Figure 2\_para-NMe2\_ts(CuHadd\_rev) / electronic energy: -2800.14106095 a.u. / lowest freq: -810.46 cm-1

|   |           |          |           |
|---|-----------|----------|-----------|
| B | -1.240346 | 1.451404 | 0.484642  |
| O | -2.045037 | 1.694654 | 1.590324  |
| O | -1.890277 | 1.830458 | -0.690998 |
| C | -3.360289 | 1.994945 | 1.115625  |
| C | -3.070735 | 2.553032 | -0.323766 |
| C | -4.020442 | 2.987571 | 2.060366  |
| C | -4.151231 | 0.685164 | 1.092822  |
| C | -2.714279 | 4.040565 | -0.319303 |
| C | -4.168559 | 2.287443 | -1.341911 |

|    |           |           |           |
|----|-----------|-----------|-----------|
| H  | -1.942736 | 4.264063  | 0.432732  |
| H  | -3.591746 | 4.672717  | -0.118437 |
| H  | -2.311819 | 4.313174  | -1.306259 |
| H  | -4.351936 | 1.213543  | -1.472005 |
| H  | -3.880150 | 2.702199  | -2.319536 |
| H  | -5.109397 | 2.768643  | -1.033824 |
| H  | -3.702128 | -0.041583 | 0.399430  |
| H  | -5.201989 | 0.843267  | 0.808720  |
| H  | -4.131951 | 0.240721  | 2.099110  |
| H  | -4.996379 | 3.312935  | 1.668345  |
| H  | -3.392750 | 3.874646  | 2.217585  |
| H  | -4.188083 | 2.515942  | 3.040385  |
| C  | 3.388192  | 1.356564  | -1.107838 |
| C  | 4.764153  | 1.261028  | -0.912298 |
| C  | 2.483765  | 0.548142  | -0.415345 |
| C  | 5.307780  | 0.331262  | 0.002517  |
| C  | 3.021524  | -0.380463 | 0.483374  |
| C  | 4.389946  | -0.495648 | 0.694508  |
| C  | 1.007372  | 0.697363  | -0.613316 |
| C  | 0.154367  | 0.866777  | 0.547644  |
| H  | 4.745533  | -1.243275 | 1.403429  |
| H  | 2.349292  | -1.046096 | 1.033168  |
| H  | 5.415506  | 1.923203  | -1.482367 |
| H  | 3.011022  | 2.091725  | -1.825016 |
| Cu | -0.293955 | -0.876040 | -0.461526 |
| H  | 0.576872  | 0.596597  | 1.523169  |
| H  | 0.833646  | -0.666099 | -1.565086 |
| H  | 0.759845  | 1.333488  | -1.470963 |
| H  | 7.405938  | 2.136644  | -0.362152 |
| H  | 8.604462  | 0.828866  | -0.264034 |
| C  | 7.570994  | 1.060085  | -0.548851 |
| H  | 7.479899  | 0.891769  | -1.637294 |
| N  | 6.665469  | 0.230147  | 0.208655  |
| H  | 6.782871  | -0.559781 | 2.173865  |
| H  | 8.274533  | -0.628501 | 1.214724  |
| C  | 7.183514  | -0.725498 | 1.157896  |
| H  | 6.954108  | -1.769503 | 0.875164  |
| H  | -4.569436 | -3.343668 | -0.506235 |
| H  | -4.203138 | -1.183911 | -1.967851 |
| H  | -3.310719 | -4.027649 | 1.422971  |
| C  | -3.508882 | -3.543125 | -0.716727 |
| C  | -3.124948 | -1.402157 | -2.002706 |
| H  | -0.940671 | -3.527725 | 2.510410  |
| N  | -2.771754 | -2.301387 | -0.933898 |
| C  | -2.762619 | -4.152361 | 0.472824  |
| H  | -2.571802 | -0.460622 | -1.880366 |
| C  | -1.602320 | -2.273335 | -0.278424 |
| N  | -1.535839 | -3.358529 | 0.500707  |
| H  | -3.451898 | -4.179886 | -1.616923 |
| H  | -2.891497 | -1.834948 | -2.991390 |
| C  | -0.520537 | -3.597378 | 1.492592  |
| H  | -2.543013 | -5.221776 | 0.342215  |
| H  | 0.265226  | -2.837699 | 1.387376  |
| H  | -0.072296 | -4.595638 | 1.367052  |

63

Figure 2 para-NMe2 L-Cu-alkyl\_rev / electronic energy: -2800.19059809 a.u. / lowest freq: 17.92 cm-1

|    |           |           |           |
|----|-----------|-----------|-----------|
| B  | 1.691100  | -1.551271 | 0.519713  |
| O  | 2.702162  | -1.506734 | 1.484186  |
| O  | 2.255701  | -1.757016 | -0.746608 |
| C  | 3.951749  | -1.365448 | 0.810690  |
| C  | 3.649820  | -2.016935 | -0.587425 |
| C  | 5.042435  | -2.061787 | 1.611291  |
| C  | 4.257091  | 0.131426  | 0.710187  |
| C  | 3.841283  | -3.534644 | -0.585674 |
| C  | 4.414404  | -1.401753 | -1.750870 |
| H  | 3.321791  | -4.001047 | 0.264714  |
| H  | 4.903972  | -3.816225 | -0.542844 |
| H  | 3.413243  | -3.949289 | -1.510601 |
| H  | 4.185386  | -0.334549 | -1.867674 |
| H  | 4.141395  | -1.909737 | -2.688292 |
| H  | 5.500493  | -1.513482 | -1.609121 |
| H  | 3.481393  | 0.655037  | 0.131642  |
| H  | 5.235349  | 0.324833  | 0.246048  |
| H  | 4.264888  | 0.562917  | 1.722376  |
| H  | 5.999113  | -2.046448 | 1.066510  |
| H  | 4.781398  | -3.105819 | 1.829774  |
| H  | 5.190692  | -1.544364 | 2.571206  |
| C  | -3.252826 | -2.434514 | -0.583288 |
| C  | -4.595248 | -2.070764 | -0.595342 |
| C  | -2.244794 | -1.596304 | -0.085658 |
| C  | -5.014656 | -0.816741 | -0.092141 |
| C  | -2.667687 | -0.364485 | 0.419565  |
| C  | -4.006479 | 0.027072  | 0.421570  |
| C  | -0.790562 | -2.042994 | -0.135493 |
| C  | 0.209551  | -1.345348 | 0.784760  |
| H  | -4.260984 | 1.001460  | 0.839870  |
| H  | -1.922294 | 0.322131  | 0.832424  |
| H  | -5.322942 | -2.776616 | -0.996903 |
| H  | -2.978408 | -3.417548 | -0.980727 |
| Cu | 0.448142  | 0.592583  | 0.388959  |
| H  | -0.054259 | -1.449226 | 1.852888  |
| H  | -0.443556 | -1.943243 | -1.180633 |
| H  | -0.798248 | -3.137353 | 0.043575  |
| H  | -7.376184 | -2.298828 | -0.015544 |
| H  | -8.334584 | -0.885584 | -0.507843 |
| C  | -7.346383 | -1.354459 | -0.589825 |
| H  | -7.189181 | -1.614921 | -1.652012 |

|   |           |           |           |
|---|-----------|-----------|-----------|
| N | -6.342181 | -0.441892 | -0.099868 |
| H | -6.500855 | 0.916666  | 1.529527  |
| H | -7.814137 | 0.966406  | 0.331944  |
| C | -6.732054 | 0.832242  | 0.451225  |
| H | -6.236210 | 1.675921  | -0.061737 |
| H | 2.719358  | 4.564823  | -1.394725 |
| H | 3.215536  | 2.069073  | -2.245188 |
| H | 1.651468  | 5.253969  | 0.635498  |
| C | 1.671810  | 4.236493  | -1.322821 |
| C | 2.140504  | 1.877936  | -2.099462 |
| H | 0.140081  | 4.100084  | 2.527781  |
| N | 1.591473  | 2.790003  | -1.128335 |
| C | 0.958899  | 4.772869  | -0.075153 |
| H | 2.005308  | 0.848008  | -1.739932 |
| C | 0.818334  | 2.439819  | -0.094085 |
| N | 0.404602  | 3.554744  | 0.513645  |
| H | 1.160812  | 4.521490  | -2.257702 |
| H | 1.635925  | 1.984785  | -3.074858 |
| C | -0.402311 | 3.605874  | 1.704692  |
| H | 0.161477  | 5.492815  | -0.312323 |
| H | -0.648250 | 2.580589  | 2.011077  |
| H | -1.338041 | 4.159422  | 1.524241  |

84

Figure 2 para-NMe2\_pc3\_01 / electronic energy: -3639.01987332 a.u. / lowest freq: 17.29 cm-1

|    |           |           |           |
|----|-----------|-----------|-----------|
| C  | 1.578826  | 0.473364  | -0.560801 |
| C  | 1.674011  | 0.800156  | 0.793789  |
| C  | 1.429642  | 2.192356  | 1.290484  |
| O  | 2.641029  | 2.989021  | 1.266016  |
| P  | 3.135061  | 3.647826  | -0.101672 |
| O  | 2.097770  | 4.154144  | -1.024245 |
| O  | 4.143822  | 4.724216  | 0.530269  |
| O  | 4.082575  | 2.581509  | -0.839862 |
| C  | 4.920287  | 5.538823  | -0.340739 |
| H  | 2.096525  | -0.393891 | -0.981087 |
| H  | 1.275136  | 1.233825  | -1.288985 |
| H  | 2.273988  | 0.166619  | 1.458229  |
| H  | 0.665042  | 2.707531  | 0.688849  |
| H  | 1.113767  | 2.202872  | 2.341385  |
| B  | 0.467058  | -3.141033 | -0.878527 |
| O  | 0.923831  | -3.886970 | 0.182783  |
| O  | 1.461809  | -2.898595 | -1.791703 |
| C  | 2.355621  | -3.980814 | 0.091705  |
| C  | 2.611454  | -3.684944 | -1.433939 |
| C  | 2.797810  | -5.359539 | 0.556070  |
| C  | 2.931905  | -2.909295 | 1.015244  |
| C  | 2.581610  | -4.944064 | -2.298866 |
| C  | 3.873440  | -2.886222 | -1.720578 |
| H  | 1.676319  | -5.539721 | -2.108880 |
| H  | 3.461948  | -5.578444 | -2.122374 |
| H  | 2.575895  | -4.650897 | -3.358934 |
| H  | 3.861419  | -1.907575 | -1.223415 |
| H  | 3.968149  | -2.714247 | -2.802837 |
| H  | 4.765091  | -3.437205 | -1.384953 |
| H  | 2.622799  | -1.904073 | 0.696793  |
| H  | 4.030458  | -2.944385 | 1.045343  |
| H  | 2.555938  | -3.071113 | 2.036353  |
| H  | 3.879797  | -5.491240 | 0.405314  |
| H  | 2.270190  | -6.159059 | 0.019696  |
| H  | 2.588023  | -5.476846 | 1.629638  |
| C  | -2.574959 | 0.732419  | -2.016315 |
| C  | -3.799963 | 1.388975  | -2.065839 |
| C  | -2.374012 | -0.470584 | -1.309377 |
| C  | -4.938774 | 0.871900  | -1.409179 |
| C  | -3.513987 | -0.971548 | -0.656142 |
| C  | -4.751157 | -0.325894 | -0.691262 |
| C  | -1.028607 | -1.094460 | -1.220494 |
| C  | -1.004252 | -2.614072 | -0.997146 |
| H  | -5.582934 | -0.783337 | -0.153942 |
| H  | -3.439934 | -1.897183 | -0.079258 |
| H  | -3.864773 | 2.318461  | -2.632758 |
| H  | -1.723929 | 1.181951  | -2.539663 |
| Cu | -0.065839 | -0.198246 | 0.339343  |
| H  | -1.532827 | -3.161582 | -1.809415 |
| H  | -1.526047 | -2.893645 | -0.065661 |
| H  | -0.463601 | -0.856456 | -2.136510 |
| H  | 5.544643  | 6.183099  | 0.290806  |
| H  | 4.275191  | 6.166764  | -0.974255 |
| H  | 5.571745  | 4.925631  | -0.983914 |
| C  | 5.051586  | 1.824629  | -0.129830 |
| H  | 5.759145  | 1.425602  | -0.868260 |
| H  | 4.575397  | 0.986822  | 0.402078  |
| H  | 5.603517  | 2.446486  | 0.592284  |
| H  | -0.176307 | -2.538190 | 3.744263  |
| H  | -2.265825 | -1.045803 | 4.622864  |
| C  | -0.734945 | -2.554460 | 2.791652  |
| H  | -0.022827 | -2.598048 | 1.959187  |
| H  | -1.343921 | -3.471662 | 2.766438  |
| C  | -2.664342 | -1.147850 | 3.598407  |
| N  | -1.571427 | -1.390758 | 2.658395  |
| H  | -3.382639 | -1.980495 | 3.592795  |
| H  | -3.432912 | 0.906455  | 3.857223  |
| C  | -1.310110 | -0.335225 | 1.878296  |
| C  | -3.256992 | 0.160077  | 3.068702  |
| N  | -2.223661 | 0.606708  | 2.139021  |
| H  | -4.205372 | 0.004962  | 2.525052  |
| H  | -2.376300 | 2.701914  | 2.087210  |
| C  | -2.381072 | 1.835535  | 1.406152  |

|   |           |          |           |
|---|-----------|----------|-----------|
| H | -1.553903 | 1.937889 | 0.691717  |
| H | -3.328044 | 1.835409 | 0.840647  |
| H | -5.626472 | 3.567760 | -1.302411 |
| H | -5.865928 | 2.974451 | -2.967451 |
| C | -6.226359 | 2.877954 | -1.930906 |
| H | -7.266687 | 3.228585 | -1.920605 |
| N | -6.177957 | 1.509199 | -1.475317 |
| H | -7.469129 | 0.005120 | -0.753304 |
| H | -8.142151 | 1.639395 | -0.794853 |
| C | -7.227548 | 1.067370 | -0.590499 |
| H | -6.979618 | 1.194216 | 0.484021  |

84

Figure 2\_para-NMe2\_pc3\_02 / electronic energy: -3639.01951463 a.u. / lowest freq: 15.61 cm-1

|    |           |           |           |
|----|-----------|-----------|-----------|
| C  | 0.576687  | -1.050059 | -1.110766 |
| C  | 0.599460  | -1.909252 | -0.012696 |
| C  | 1.745611  | -1.976272 | 0.947550  |
| O  | 2.765088  | -2.895775 | 0.475578  |
| P  | 4.212419  | -2.338090 | 0.104301  |
| O  | 4.886591  | -1.471410 | 1.092316  |
| O  | 4.907025  | -3.739886 | -0.238404 |
| O  | 4.063546  | -1.568910 | -1.301093 |
| C  | 6.311820  | -3.785438 | -0.467022 |
| H  | -0.068802 | -1.268862 | -1.967926 |
| H  | 1.394810  | -0.346394 | -1.300167 |
| H  | -0.053367 | -2.790631 | -0.020518 |
| H  | 2.196307  | -0.986245 | 1.108430  |
| H  | 1.425592  | -2.363463 | 1.924423  |
| B  | 0.650108  | 2.510254  | -1.311613 |
| O  | 1.897629  | 2.068648  | -1.681942 |
| O  | 0.724267  | 3.497032  | -0.357203 |
| C  | 2.855448  | 2.616942  | -0.756510 |
| C  | 2.101805  | 3.887118  | -0.221101 |
| C  | 4.154374  | 2.902358  | -1.491317 |
| C  | 3.086132  | 1.564115  | 0.324278  |
| C  | 2.310746  | 5.120367  | -1.098458 |
| C  | 2.387283  | 4.227807  | 1.232780  |
| H  | 2.128562  | 4.895833  | -2.160036 |
| H  | 3.328554  | 5.523972  | -0.996337 |
| H  | 1.599193  | 5.900956  | -0.791720 |
| H  | 2.108898  | 3.408608  | 1.908035  |
| H  | 1.815131  | 5.120563  | 1.526588  |
| H  | 3.456280  | 4.447063  | 1.375653  |
| H  | 2.151205  | 1.334039  | 0.858744  |
| H  | 3.837557  | 1.887955  | 1.057964  |
| H  | 3.452888  | 0.641607  | -0.145238 |
| H  | 4.871470  | 3.409762  | -0.828603 |
| H  | 3.991730  | 3.527661  | -2.378960 |
| H  | 4.608475  | 1.955973  | -1.820568 |
| C  | -3.817126 | 0.753519  | 0.036116  |
| C  | -5.044087 | 0.125035  | -0.148253 |
| C  | -2.789154 | 0.731856  | -0.929180 |
| C  | -5.333543 | -0.587733 | -1.333186 |
| C  | -3.107397 | 0.056460  | -2.122021 |
| C  | -4.332312 | -0.580767 | -2.325189 |
| C  | -1.458569 | 1.332105  | -0.649528 |
| C  | -0.702130 | 1.929113  | -1.844614 |
| H  | -4.499292 | -1.081721 | -3.279704 |
| H  | -2.370783 | 0.021028  | -2.929680 |
| H  | -5.786853 | 0.196915  | 0.647333  |
| H  | -3.641326 | 1.287283  | 0.976317  |
| Cu | -0.571662 | -0.236792 | 0.306738  |
| H  | -1.291108 | 2.719722  | -2.358304 |
| H  | -0.474591 | 1.168388  | -2.609692 |
| H  | -1.583516 | 2.112588  | 0.120315  |
| H  | 6.561736  | -4.825243 | -0.711469 |
| H  | 6.866200  | -3.479228 | 0.432650  |
| H  | 6.603195  | -3.138576 | -1.309830 |
| C  | 3.511904  | -2.207327 | -2.446146 |
| H  | 3.250143  | -1.420027 | -3.163894 |
| H  | 2.604971  | -2.775655 | -2.191551 |
| H  | 4.248643  | -2.884833 | -2.904673 |
| H  | -2.756953 | -3.060206 | 2.518841  |
| H  | -2.872532 | -1.335207 | 4.640887  |
| C  | -2.850705 | -2.132002 | 1.932105  |
| H  | -2.339234 | -2.263208 | 0.970277  |
| H  | -3.920086 | -1.950531 | 1.733452  |
| C  | -2.842554 | -0.537776 | 3.884228  |
| N  | -2.263584 | -1.019245 | 2.631488  |
| H  | -3.876531 | -0.192415 | 3.710148  |
| H  | -1.209261 | 0.336623  | 5.075064  |
| C  | -1.332989 | -0.196186 | 2.136519  |
| C  | -1.896802 | 0.608004  | 4.255398  |
| N  | -1.150211 | 0.798491  | 3.013547  |
| H  | -2.425019 | 1.528491  | 4.543229  |
| H  | 0.753808  | 1.597810  | 3.473195  |
| C  | -0.155060 | 1.833379  | 2.892086  |
| H  | 0.114344  | 1.960265  | 1.834701  |
| H  | -0.560582 | 2.789237  | 3.256840  |
| H  | -6.967031 | -0.910691 | -3.576632 |
| H  | -6.161630 | -2.457648 | -3.207063 |
| C  | -6.893487 | -1.725141 | -2.828226 |
| H  | -7.865316 | -2.233507 | -2.785595 |
| N  | -6.541419 | -1.256023 | -1.510595 |
| H  | -7.282578 | -1.353065 | 0.463974  |
| H  | -8.455806 | -1.690399 | -0.816754 |
| C  | -7.598527 | -1.058311 | -0.550522 |
| H  | -7.953785 | -0.009177 | -0.497049 |



84

Figure 2\_para-NMe2\_ts(AS)\_01 / electronic energy: -3638.99054294 a.u. / lowest freq: -333.16 cm-1

|    |           |           |           |
|----|-----------|-----------|-----------|
| C  | 1.173855  | 1.196094  | -0.383305 |
| C  | 1.247783  | 1.505878  | 1.007529  |
| C  | 0.148421  | 2.015574  | 1.704439  |
| O  | 0.191071  | 4.066615  | 1.672520  |
| P  | -0.169159 | 4.540002  | 0.263419  |
| O  | -1.095800 | 3.740804  | -0.595631 |
| O  | -0.693190 | 6.071963  | 0.483773  |
| O  | 1.211818  | 4.764935  | -0.588365 |
| C  | -1.133936 | 6.804115  | -0.637869 |
| H  | 2.079662  | 0.906234  | -0.922675 |
| H  | 0.408768  | 1.705996  | -0.979723 |
| H  | 2.184040  | 1.354362  | 1.553665  |
| H  | -0.824966 | 2.066168  | 1.215396  |
| H  | 0.158949  | 2.045637  | 2.793401  |
| B  | 2.383288  | -2.230438 | -1.046740 |
| O  | 3.210702  | -2.751767 | -0.085145 |
| O  | 3.042707  | -1.364586 | -1.878301 |
| C  | 4.457042  | -2.029043 | -0.128846 |
| C  | 4.451320  | -1.449955 | -1.592050 |
| C  | 5.600038  | -2.982101 | 0.177213  |
| C  | 4.372821  | -0.944001 | 0.941887  |
| C  | 5.058709  | -2.407396 | -2.615656 |
| C  | 5.072222  | -0.069481 | -1.731071 |
| H  | 4.618705  | -3.412734 | -2.535457 |
| H  | 6.148013  | -2.492692 | -2.494427 |
| H  | 4.853630  | -2.027691 | -3.627262 |
| H  | 4.567772  | 0.673362  | -1.099276 |
| H  | 4.997305  | 0.267760  | -2.775343 |
| H  | 6.137880  | -0.095773 | -1.457471 |
| H  | 3.552276  | -0.243601 | 0.730574  |
| H  | 5.308625  | -0.372189 | 1.017232  |
| H  | 4.178850  | -1.413080 | 1.917766  |
| H  | 6.569035  | -2.473903 | 0.061060  |
| H  | 5.585087  | -3.861691 | -0.479516 |
| H  | 5.523610  | -3.334254 | 1.216668  |
| C  | -2.230595 | -0.377439 | -1.905882 |
| C  | -3.615947 | -0.441507 | -1.990021 |
| C  | -1.453753 | -1.414845 | -1.359209 |
| C  | -4.325832 | -1.576762 | -1.536621 |
| C  | -2.165550 | -2.536576 | -0.906829 |
| C  | -3.554318 | -2.622412 | -0.984412 |
| C  | 0.024097  | -1.268113 | -1.231976 |
| C  | 0.851639  | -2.552187 | -1.159713 |
| H  | -4.036497 | -3.525201 | -0.608443 |
| H  | -1.624915 | -3.377089 | -0.464203 |
| H  | -4.146785 | 0.408651  | -2.418499 |
| H  | -1.730523 | 0.527072  | -2.266545 |
| Cu | 0.247128  | -0.281258 | 0.516371  |
| H  | 0.681217  | -3.167022 | -2.068568 |
| H  | 0.557413  | -3.185715 | -0.307151 |
| H  | 0.395688  | -0.638780 | -2.050830 |
| H  | -1.490336 | 7.781915  | -0.283051 |
| H  | -1.959941 | 6.290196  | -1.156593 |
| H  | -0.319182 | 6.970356  | -1.363981 |
| C  | 2.309696  | 5.397520  | 0.025871  |
| H  | 3.147580  | 5.385289  | -0.686215 |
| H  | 2.613457  | 4.874825  | 0.947532  |
| H  | 2.085060  | 6.447994  | 0.281777  |
| H  | 1.625227  | -2.691361 | 3.522249  |
| H  | -0.881063 | -2.872247 | 4.496362  |
| C  | 1.147917  | -2.894331 | 2.548071  |
| H  | 1.714545  | -2.387201 | 1.758583  |
| H  | 1.197075  | -3.977950 | 2.359371  |
| C  | -1.202340 | -3.021389 | 3.452001  |
| N  | -0.218655 | -2.441843 | 2.537709  |
| H  | -1.305448 | -4.102675 | 3.278529  |
| H  | -2.958230 | -1.792637 | 3.989429  |
| C  | -0.681932 | -1.372320 | 1.886327  |
| C  | -2.472357 | -2.235497 | 3.107457  |
| N  | -1.961640 | -1.196283 | 2.217017  |
| H  | -3.220236 | -2.846965 | 2.575197  |
| H  | -3.166208 | 0.511241  | 2.470950  |
| C  | -2.839354 | -0.187535 | 1.683721  |
| H  | -2.315652 | 0.374722  | 0.901348  |
| H  | -3.730075 | -0.652818 | 1.232876  |
| H  | -6.332001 | 0.349766  | -1.244400 |
| H  | -6.170220 | -0.088546 | -2.966466 |
| C  | -6.458027 | -0.473622 | -1.974927 |
| H  | -7.525942 | -0.721619 | -2.022975 |
| N  | -5.705809 | -1.655756 | -1.625076 |
| H  | -6.067965 | -3.717898 | -1.338964 |
| H  | -7.469553 | -2.654249 | -1.145243 |
| C  | -6.391552 | -2.735641 | -0.957371 |
| H  | -6.235606 | -2.734026 | 0.140049  |

84

Figure 2\_para-NMe2\_ts(AS)\_02 / electronic energy: -3638.99039008 a.u. / lowest freq: -339.36 cm-1

|   |          |           |           |
|---|----------|-----------|-----------|
| C | 0.424023 | -0.962412 | -1.267192 |
| C | 0.379024 | -2.023710 | -0.324030 |
| C | 1.178822 | -2.055824 | 0.823904  |
| O | 2.772440 | -3.297414 | 0.465123  |
| P | 4.036718 | -2.476391 | 0.210798  |
| O | 4.529104 | -1.484626 | 1.210179  |
| O | 5.161650 | -3.596410 | -0.173337 |
| O | 3.852092 | -1.666119 | -1.208268 |
| C | 6.494787 | -3.173867 | -0.357082 |

|    |           |           |           |
|----|-----------|-----------|-----------|
| H  | -0.163039 | -1.049016 | -2.185184 |
| H  | 1.318783  | -0.334389 | -1.339322 |
| H  | -0.341871 | -2.835126 | -0.465662 |
| H  | 1.838443  | -1.221029 | 1.071425  |
| H  | 0.910621  | -2.714331 | 1.648391  |
| B  | 0.694405  | 2.481133  | -1.354559 |
| O  | 1.913660  | 1.982076  | -1.731309 |
| O  | 0.811246  | 3.468713  | -0.408623 |
| C  | 2.896589  | 2.482961  | -0.800191 |
| C  | 2.209541  | 3.796513  | -0.282133 |
| C  | 4.214333  | 2.690046  | -1.526526 |
| C  | 3.058256  | 1.427542  | 0.289937  |
| C  | 2.472439  | 5.004887  | -1.178933 |
| C  | 2.514725  | 4.145956  | 1.164955  |
| H  | 2.279726  | 4.773133  | -2.237152 |
| H  | 3.508106  | 5.361481  | -1.083101 |
| H  | 1.799081  | 5.823173  | -0.883985 |
| H  | 2.217907  | 3.344943  | 1.853051  |
| H  | 1.973253  | 5.060359  | 1.449994  |
| H  | 3.591034  | 4.333100  | 1.296885  |
| H  | 2.104982  | 1.253619  | 0.814552  |
| H  | 3.811546  | 1.723178  | 1.033042  |
| H  | 3.387755  | 0.478645  | -0.154069 |
| H  | 4.954774  | 3.154876  | -0.858318 |
| H  | 4.095868  | 3.322248  | -2.416175 |
| H  | 4.613676  | 1.717393  | -1.849229 |
| C  | -3.781622 | 0.817600  | 0.041616  |
| C  | -5.036197 | 0.241235  | -0.124654 |
| C  | -2.761699 | 0.708922  | -0.920104 |
| C  | -5.352969 | -0.495732 | -1.289361 |
| C  | -3.089131 | -0.013434 | -2.079261 |
| C  | -4.337694 | -0.600271 | -2.267108 |
| C  | -1.409821 | 1.288251  | -0.669897 |
| C  | -0.690563 | 1.941100  | -1.854523 |
| H  | -4.521085 | -1.141275 | -3.195882 |
| H  | -2.341175 | -0.128309 | -2.868934 |
| H  | -5.778453 | 0.374490  | 0.662961  |
| H  | -3.581823 | 1.378479  | 0.960630  |
| Cu | -0.541453 | -0.250635 | 0.290531  |
| H  | -1.303213 | 2.772609  | -2.256657 |
| H  | -0.533021 | 1.235840  | -2.685003 |
| H  | -1.489461 | 2.025450  | 0.144383  |
| H  | 7.087361  | -4.052326 | -0.650644 |
| H  | 6.917149  | -2.751008 | 0.569041  |
| H  | 6.577016  | -2.414188 | -1.153735 |
| C  | 3.411214  | -2.351201 | -2.357254 |
| H  | 3.059939  | -1.606308 | -3.086005 |
| H  | 2.583545  | -3.040531 | -2.125574 |
| H  | 4.230373  | -2.931344 | -2.816862 |
| H  | -2.642777 | -2.953790 | 2.578161  |
| H  | -2.722204 | -1.201318 | 4.671122  |
| C  | -2.740932 | -2.042249 | 1.967700  |
| H  | -2.219541 | -2.192990 | 1.013494  |
| H  | -3.810025 | -1.872046 | 1.758733  |
| C  | -2.728304 | -0.416738 | 3.900970  |
| N  | -2.165408 | -0.908605 | 2.644534  |
| H  | -3.773277 | -0.100150 | 3.741369  |
| H  | -1.095769 | 0.521680  | 5.044967  |
| C  | -1.258372 | -0.078360 | 2.126874  |
| C  | -1.801405 | 0.757619  | 4.230664  |
| N  | -1.072405 | 0.935076  | 2.974500  |
| H  | -2.343817 | 1.674676  | 4.501502  |
| H  | 0.812434  | 1.772150  | 3.428381  |
| C  | -0.088167 | 1.977142  | 2.824582  |
| H  | 0.197820  | 2.064062  | 1.768462  |
| H  | -0.509964 | 2.941495  | 3.144723  |
| H  | -6.838917 | -1.162541 | -3.574296 |
| H  | -6.180682 | -2.644216 | -2.832958 |
| C  | -6.881356 | -1.804975 | -2.674820 |
| H  | -7.891879 | -2.227513 | -2.614193 |
| N  | -6.590709 | -1.079153 | -1.462760 |
| H  | -7.322507 | -1.324575 | 0.514972  |
| H  | -8.531341 | -1.410018 | -0.783262 |
| C  | -7.614629 | -0.900327 | -0.463166 |
| H  | -7.863258 | 0.164833  | -0.302469 |

84

Figure 2 para-NMe2\_pi-allyl\_01 / electronic energy: -3639.01658157 a.u. / lowest freq: 26.65 cm<sup>-1</sup>

|   |           |           |           |
|---|-----------|-----------|-----------|
| C | 1.038181  | 1.960407  | -1.003317 |
| C | 1.580404  | 2.438469  | 0.220008  |
| C | 0.810472  | 2.475599  | 1.372660  |
| O | -2.261328 | 3.193993  | 1.274047  |
| P | -2.883071 | 2.843393  | -0.047145 |
| O | -2.112057 | 2.170182  | -1.150381 |
| O | -4.223496 | 1.947848  | 0.310092  |
| O | -3.571709 | 4.177421  | -0.723748 |
| C | -4.936152 | 1.345691  | -0.739848 |
| H | 1.713451  | 1.809466  | -1.846867 |
| H | -0.036880 | 2.110487  | -1.207353 |
| H | 2.670758  | 2.508957  | 0.309192  |
| H | -0.286520 | 2.597414  | 1.329898  |
| H | 1.295618  | 2.643814  | 2.338779  |
| B | 3.404171  | -0.898160 | -0.793056 |
| O | 4.457440  | -1.202579 | 0.026640  |
| O | 3.676163  | 0.156539  | -1.620088 |
| C | 5.444619  | -0.160934 | -0.106589 |
| C | 5.078377  | 0.468752  | -1.503493 |
| C | 6.833170  | -0.773981 | -0.030019 |

|    |           |           |           |
|----|-----------|-----------|-----------|
| C  | 5.231898  | 0.800898  | 1.060648  |
| C  | 5.784106  | -0.215166 | -2.672458 |
| C  | 5.260932  | 1.974943  | -1.589658 |
| H  | 5.662292  | -1.307900 | -2.633224 |
| H  | 6.858638  | 0.016433  | -2.687896 |
| H  | 5.341407  | 0.140714  | -3.614221 |
| H  | 4.632322  | 2.506372  | -0.863305 |
| H  | 4.986563  | 2.326826  | -2.595005 |
| H  | 6.311684  | 2.247163  | -1.409451 |
| H  | 4.229518  | 1.251832  | 1.029624  |
| H  | 5.977556  | 1.608290  | 1.061847  |
| H  | 5.324388  | 0.247438  | 2.006688  |
| H  | 7.603689  | -0.008745 | -0.207642 |
| H  | 6.964925  | -1.580680 | -0.762646 |
| H  | 6.998148  | -1.196330 | 0.972196  |
| C  | -1.574093 | -1.073656 | -1.867585 |
| C  | -2.807086 | -1.709525 | -1.916690 |
| C  | -0.495565 | -1.582194 | -1.125424 |
| C  | -3.043720 | -2.908782 | -1.204608 |
| C  | -0.734846 | -2.768763 | -0.417157 |
| C  | -1.965692 | -3.418061 | -0.445234 |
| C  | 0.810071  | -0.864584 | -1.102899 |
| C  | 2.049396  | -1.691031 | -0.780784 |
| H  | -2.080159 | -4.338243 | 0.128080  |
| H  | 0.060029  | -3.207973 | 0.190598  |
| H  | -3.599199 | -1.256261 | -2.512169 |
| H  | -1.458695 | -0.121123 | -2.390922 |
| Cu | 0.751199  | 0.515715  | 0.367723  |
| H  | 2.152707  | -2.495073 | -1.540666 |
| H  | 1.959213  | -2.218131 | 0.181488  |
| H  | 0.948817  | -0.339493 | -2.053864 |
| H  | -5.730391 | 0.722635  | -0.301110 |
| H  | -4.281370 | 0.712445  | -1.359797 |
| H  | -5.409725 | 2.096332  | -1.398488 |
| C  | -4.342881 | 5.021281  | 0.093445  |
| H  | -4.619652 | 5.910925  | -0.492530 |
| H  | -3.781979 | 5.343623  | 0.987029  |
| H  | -5.270600 | 4.526385  | 0.433171  |
| H  | 2.640647  | -0.658879 | 3.734381  |
| H  | 0.294033  | -1.535241 | 4.698495  |
| C  | 2.362738  | -1.233943 | 2.834154  |
| H  | 2.791209  | -0.742632 | 1.953681  |
| H  | 2.806329  | -2.237863 | 2.912329  |
| C  | 0.126080  | -2.003493 | 3.713745  |
| N  | 0.931775  | -1.324281 | 2.697844  |
| H  | 0.400901  | -3.065432 | 3.787106  |
| H  | -1.988908 | -1.412370 | 3.968580  |
| C  | 0.180264  | -0.591245 | 1.871395  |
| C  | -1.300381 | -1.785109 | 3.196860  |
| N  | -1.101138 | -0.787054 | 2.149526  |
| H  | -1.737295 | -2.697118 | 2.755879  |
| H  | -2.790971 | 0.465720  | 2.076025  |
| C  | -2.212963 | -0.212216 | 1.432706  |
| H  | -1.839744 | 0.362159  | 0.575408  |
| H  | -2.873553 | -1.009269 | 1.056928  |
| H  | -5.623187 | -1.913238 | -1.439277 |
| H  | -5.201171 | -2.735115 | -2.964400 |
| C  | -5.385468 | -2.895744 | -1.888689 |
| H  | -6.275327 | -3.530840 | -1.799713 |
| N  | -4.267464 | -3.542125 | -1.242087 |
| H  | -3.790351 | -5.509013 | -0.629351 |
| H  | -5.509586 | -5.081958 | -0.587525 |
| C  | -4.499742 | -4.694447 | -0.405395 |
| H  | -4.414186 | -4.464317 | 0.674395  |

84

Figure 2\_para-NMe2\_pi-allyl\_02 / electronic energy: -3639.01320290 a.u. / lowest freq: 11.59 cm-1

|   |           |           |           |
|---|-----------|-----------|-----------|
| C | 0.100664  | -0.378414 | -2.118302 |
| C | -0.621887 | -1.599517 | -2.202091 |
| C | -0.391313 | -2.641485 | -1.317479 |
| O | 2.404002  | -3.174043 | 0.294282  |
| P | 3.153005  | -2.104875 | -0.444503 |
| O | 2.812787  | -0.641479 | -0.311267 |
| O | 4.746655  | -2.338868 | -0.126819 |
| O | 3.085558  | -2.396072 | -2.065943 |
| C | 5.684701  | -1.414641 | -0.621844 |
| H | -0.195210 | 0.449025  | -2.764420 |
| H | 1.138959  | -0.380606 | -1.752144 |
| H | -1.556615 | -1.603850 | -2.776193 |
| H | 0.572903  | -2.794658 | -0.811349 |
| H | -1.111346 | -3.462508 | -1.257608 |
| B | 1.191130  | 2.557344  | -0.275378 |
| O | 2.125194  | 3.164276  | -1.064379 |
| O | 1.657690  | 2.259778  | 0.969615  |
| C | 3.391988  | 3.160883  | -0.377776 |
| C | 2.988747  | 2.784311  | 1.112640  |
| C | 4.023013  | 4.538940  | -0.530719 |
| C | 4.267755  | 2.111768  | -1.056994 |
| C | 2.882968  | 3.992569  | 2.041555  |
| C | 3.864397  | 1.709175  | 1.742038  |
| H | 2.213581  | 4.762879  | 1.630800  |
| H | 3.865686  | 4.447893  | 2.230976  |
| H | 2.465516  | 3.666045  | 3.005743  |
| H | 3.777902  | 0.767388  | 1.182739  |
| H | 3.540743  | 1.529045  | 2.778851  |
| H | 4.916732  | 2.030909  | 1.773060  |
| H | 3.824830  | 1.109120  | -0.965092 |
| H | 5.278530  | 2.099378  | -0.622585 |

|    |           |           |           |
|----|-----------|-----------|-----------|
| H  | 4.362546  | 2.364563  | -2.124247 |
| H  | 4.968239  | 4.600073  | 0.029223  |
| H  | 3.357604  | 5.339855  | -0.182264 |
| H  | 4.246358  | 4.723562  | -1.592126 |
| C  | -3.431085 | 1.008116  | 0.834410  |
| C  | -4.801768 | 0.889955  | 0.640932  |
| C  | -2.529125 | 1.162816  | -0.231083 |
| C  | -5.359774 | 0.905727  | -0.659530 |
| C  | -3.091079 | 1.201180  | -1.518451 |
| C  | -4.457540 | 1.077614  | -1.736991 |
| C  | -1.059016 | 1.245823  | 0.006019  |
| C  | -0.308972 | 2.362309  | -0.704434 |
| H  | -4.825743 | 1.116821  | -2.762212 |
| H  | -2.435874 | 1.324047  | -2.385285 |
| H  | -5.442169 | 0.782295  | 1.516439  |
| H  | -3.041400 | 0.978340  | 1.856485  |
| Cu | -0.692250 | -0.701906 | -0.305741 |
| H  | -0.799178 | 3.320334  | -0.425828 |
| H  | -0.391814 | 2.317109  | -1.799701 |
| H  | -0.855100 | 1.307035  | 1.083773  |
| H  | 6.688522  | -1.843395 | -0.481614 |
| H  | 5.636001  | -0.453348 | -0.083520 |
| H  | 5.540968  | -1.217180 | -1.698254 |
| C  | 3.194927  | -3.716825 | -2.530826 |
| H  | 3.006055  | -3.714050 | -3.614954 |
| H  | 2.464044  | -4.383410 | -2.043076 |
| H  | 4.204104  | -4.131807 | -2.356128 |
| H  | -3.343688 | -3.487566 | 1.005229  |
| H  | -2.271667 | -3.373838 | 3.484220  |
| C  | -3.279849 | -2.387882 | 1.061358  |
| H  | -3.139318 | -1.987033 | 0.049896  |
| H  | -4.231431 | -2.001249 | 1.458064  |
| C  | -2.170468 | -2.288721 | 3.326958  |
| N  | -2.181953 | -1.979962 | 1.897977  |
| H  | -3.014556 | -1.791785 | 3.830486  |
| H  | -0.143784 | -2.529424 | 4.176962  |
| C  | -1.065240 | -1.373500 | 1.496136  |
| C  | -0.804638 | -1.746703 | 3.773897  |
| N  | -0.250119 | -1.211418 | 2.530935  |
| H  | -0.886841 | -0.948714 | 4.528055  |
| H  | 1.804997  | -1.306446 | 2.903254  |
| C  | 1.060537  | -0.605972 | 2.494568  |
| H  | 1.345849  | -0.376781 | 1.458929  |
| H  | 1.074788  | 0.320207  | 3.089985  |
| H  | -7.075843 | 1.846086  | -2.662846 |
| H  | -6.817146 | 0.094620  | -2.878492 |
| C  | -7.249444 | 0.854774  | -2.204830 |
| H  | -8.332608 | 0.685951  | -2.173287 |
| N  | -6.711095 | 0.759776  | -0.868055 |
| H  | -7.369221 | -0.203565 | 0.901122  |
| H  | -8.634344 | 0.529232  | -0.104197 |
| C  | -7.608239 | 0.662125  | 0.259108  |
| H  | -7.590523 | 1.567005  | 0.894512  |

64

Figure 2\_L-Cu-OtBu\_dimer / electronic energy: -4357.97211601 a.u. / lowest freq: -19.85 cm<sup>-1</sup>

|    |           |           |           |
|----|-----------|-----------|-----------|
| H  | -1.057876 | -2.823794 | -2.825878 |
| H  | -1.980246 | -2.667714 | -1.312041 |
| O  | 0.078207  | -1.017819 | -1.258789 |
| C  | -1.048228 | -3.061420 | -1.749889 |
| H  | -1.045898 | -4.158508 | -1.636503 |
| C  | 0.158516  | -2.389922 | -1.074836 |
| H  | 1.475367  | -2.665464 | -2.785121 |
| H  | -0.759805 | -2.350911 | 0.894993  |
| C  | 1.458383  | -2.909326 | -1.710688 |
| C  | 0.156991  | -2.742073 | 0.424044  |
| H  | 2.324017  | -2.413213 | -1.241845 |
| H  | 1.581586  | -3.999730 | -1.600580 |
| H  | 1.020173  | -2.268300 | 0.919277  |
| H  | 0.205803  | -3.828385 | 0.609487  |
| Cu | 1.378579  | 0.329330  | -0.465065 |
| H  | 2.131666  | -0.991227 | 3.381390  |
| H  | 4.682348  | -1.405429 | 2.732758  |
| H  | 5.481708  | -1.718565 | 0.494438  |
| H  | 4.675857  | -1.081458 | -2.009653 |
| C  | 2.171292  | -0.117226 | 2.712040  |
| C  | 4.582052  | -0.512693 | 2.098216  |
| H  | 1.198856  | -0.010984 | 2.213049  |
| N  | 3.192040  | -0.289898 | 1.712946  |
| C  | 3.045354  | -0.000511 | 0.406199  |
| C  | 5.265779  | -0.663084 | 0.738250  |
| N  | 4.251927  | -0.137199 | -0.170576 |
| H  | 3.612584  | 0.354358  | -2.080687 |
| C  | 4.493554  | -0.077568 | -1.587637 |
| H  | 2.354764  | 0.782239  | 3.326204  |
| H  | 4.963659  | 0.354622  | 2.665833  |
| H  | 6.206045  | -0.097525 | 0.661498  |
| H  | 5.369453  | 0.553572  | -1.807185 |
| H  | -0.378809 | 4.066234  | 1.363434  |
| H  | -1.215620 | 2.487467  | 1.315536  |
| C  | -0.309944 | 3.028560  | 0.996342  |
| H  | -1.542344 | 4.628000  | -0.917965 |
| H  | -2.304280 | 3.010119  | -0.908883 |
| H  | 0.559090  | 2.547332  | 1.474899  |
| C  | -1.400215 | 3.570787  | -1.196882 |
| C  | -0.167055 | 2.941122  | -0.531923 |
| H  | 1.054762  | 4.773347  | -0.703921 |
| H  | -1.305843 | 3.511187  | -2.293040 |

|    |           |           |           |
|----|-----------|-----------|-----------|
| C  | 1.092639  | 3.703570  | -0.968950 |
| O  | -0.065048 | 1.615388  | -0.935560 |
| H  | 1.981855  | 3.258646  | -0.494162 |
| H  | 1.220534  | 3.621154  | -2.060206 |
| Cu | -1.382126 | 0.156912  | -0.516840 |
| H  | -2.351582 | 0.600724  | 3.422431  |
| H  | -4.934218 | -0.004844 | 2.870939  |
| H  | -6.034910 | 0.158807  | 0.756762  |
| H  | -5.219728 | 0.475454  | -1.806850 |
| C  | -2.122775 | -0.170906 | 2.668848  |
| C  | -4.523985 | -0.695038 | 2.117592  |
| H  | -1.198578 | 0.107935  | 2.144915  |
| N  | -3.185413 | -0.283990 | 1.706499  |
| C  | -3.039380 | -0.179163 | 0.373767  |
| C  | -5.297331 | -0.660916 | 0.794239  |
| N  | -4.235455 | -0.434437 | -0.181200 |
| H  | -3.591154 | -0.191053 | -2.134929 |
| C  | -4.528168 | -0.356233 | -1.586950 |
| H  | -1.956896 | -1.128121 | 3.192726  |
| H  | -4.493762 | -1.703279 | 2.564902  |
| H  | -5.829131 | -1.601827 | 0.585031  |
| H  | -4.988412 | -1.291515 | -1.945367 |

32

Figure 2\_L-Cu-OtBu / electronic energy: -2178.96309100 a.u. / lowest freq: 32.39 cm<sup>-1</sup>

|    |           |           |           |
|----|-----------|-----------|-----------|
| H  | 4.562030  | -0.987762 | -1.171425 |
| H  | 4.380081  | -1.687590 | 0.453032  |
| O  | 2.059982  | -0.792706 | -0.375405 |
| C  | 4.412589  | -0.739884 | -0.108257 |
| H  | 5.285124  | -0.160867 | 0.237784  |
| C  | 3.083853  | 0.016444  | 0.070903  |
| H  | 3.239088  | 1.094749  | -1.813757 |
| H  | 2.816631  | -0.564871 | 2.149701  |
| C  | 3.141678  | 1.325832  | -0.740702 |
| C  | 2.905653  | 0.363686  | 1.562854  |
| H  | 2.203830  | 1.891377  | -0.606175 |
| H  | 3.980920  | 1.980488  | -0.449346 |
| H  | 1.973161  | 0.937231  | 1.704528  |
| H  | 3.740138  | 0.957642  | 1.973285  |
| Cu | 0.281496  | -0.385007 | -0.217334 |
| H  | -2.761249 | -2.831320 | 0.955264  |
| H  | -4.389467 | -0.710878 | 1.073176  |
| H  | -3.900683 | 1.628760  | 1.086134  |
| H  | -1.572215 | 2.982676  | 0.893515  |
| C  | -2.368865 | -2.376101 | 0.031132  |
| C  | -3.894740 | -0.371839 | 0.149702  |
| H  | -1.295333 | -2.593746 | -0.043339 |
| N  | -2.556823 | -0.949305 | 0.044007  |
| C  | -1.588253 | -0.032817 | -0.058431 |
| C  | -3.606305 | 1.135384  | 0.145880  |
| N  | -2.155228 | 1.178072  | -0.017727 |
| H  | -0.385003 | 2.236847  | -0.219836 |
| C  | -1.452620 | 2.433488  | -0.055287 |
| H  | -2.885552 | -2.835640 | -0.827649 |
| H  | -4.517059 | -0.688565 | -0.702765 |
| H  | -4.103640 | 1.662997  | -0.682992 |
| H  | -1.827633 | 3.068788  | -0.873938 |

74

Figure 2\_ed / electronic energy: -3000.72395415 a.u. / lowest freq: -18.37 cm<sup>-1</sup>

|    |           |           |           |
|----|-----------|-----------|-----------|
| H  | -4.229726 | 2.326034  | -0.150745 |
| H  | -5.967249 | 0.343716  | 0.271356  |
| H  | -3.598722 | -3.318573 | 1.735428  |
| H  | -5.751654 | -1.943746 | 0.936556  |
| H  | -2.602038 | 1.801266  | -0.690477 |
| H  | -2.058957 | -2.801506 | 0.982474  |
| C  | -3.680511 | 1.617234  | -0.792634 |
| C  | -3.082739 | -0.631120 | 0.042698  |
| N  | -3.970093 | 0.257841  | -0.410861 |
| N  | -3.731163 | -1.761591 | 0.333175  |
| C  | -3.126225 | -2.981981 | 0.798743  |
| C  | -5.341967 | -0.246351 | -0.418210 |
| C  | -5.161926 | -1.699720 | 0.039540  |
| H  | -3.978015 | 1.799131  | -1.838489 |
| H  | -5.779726 | -0.163645 | -1.424914 |
| H  | -3.228038 | -3.784690 | 0.049042  |
| H  | -5.421195 | -2.428940 | -0.745075 |
| H  | -1.082452 | 3.518912  | 1.603248  |
| H  | 0.421000  | 3.855965  | 0.726137  |
| O  | 0.362799  | 1.259831  | 1.681643  |
| C  | 0.000087  | 3.675244  | 1.723920  |
| H  | 0.157069  | 4.577191  | 2.336829  |
| C  | 0.647440  | 2.454235  | 2.386838  |
| H  | -1.041587 | 2.096285  | 3.707116  |
| H  | 2.616865  | 2.798759  | 1.517328  |
| C  | 0.046175  | 2.252029  | 3.779325  |
| C  | 2.162870  | 2.651821  | 2.505931  |
| H  | 0.485762  | 1.362278  | 4.255566  |
| H  | 0.231377  | 3.121792  | 4.428639  |
| H  | 2.624169  | 1.758465  | 2.954414  |
| H  | 2.399418  | 3.521663  | 3.139641  |
| Cu | -1.156351 | -0.318937 | 0.168491  |
| H  | 3.647599  | -2.084771 | -1.808356 |
| H  | 4.667626  | -2.150948 | 0.441562  |
| H  | 3.655695  | -0.715072 | 0.059525  |
| C  | 3.791806  | -1.560284 | 0.748890  |
| H  | 3.766971  | -3.811735 | -1.373951 |
| H  | 3.989671  | -1.143848 | 1.747863  |
| C  | 3.071698  | -3.006853 | -1.658071 |

|   |           |           |           |
|---|-----------|-----------|-----------|
| H | 2.610722  | -3.279576 | -2.619431 |
| C | 1.991855  | -2.826667 | -0.601374 |
| C | 2.522294  | -2.409985 | 0.814491  |
| O | 1.169976  | -1.706527 | -0.954041 |
| H | 3.446123  | -4.284636 | 1.408303  |
| B | 0.804805  | -1.023733 | 0.203641  |
| H | 3.081088  | -3.176114 | 2.752087  |
| C | 2.709243  | -3.561359 | 1.790696  |
| O | 1.472302  | -1.555242 | 1.289645  |
| H | 1.649931  | -4.980210 | -0.367044 |
| C | 1.084847  | -4.057441 | -0.565083 |
| H | 0.586842  | -4.163168 | -1.540589 |
| H | 1.766043  | -4.089918 | 1.981929  |
| H | 0.303393  | -3.954382 | 0.202674  |
| H | 0.142553  | 4.036318  | -1.814791 |
| H | 2.021822  | 3.781526  | -0.667704 |
| C | -1.142136 | 3.179841  | -2.691591 |
| C | -0.059830 | 3.194506  | -2.489871 |
| O | -0.270892 | 1.738450  | -0.614242 |
| H | 2.659078  | 3.660530  | -2.329825 |
| C | 2.572105  | 3.136225  | -1.366163 |
| H | 0.457094  | 3.377402  | -3.444530 |
| B | 0.601562  | 1.008532  | 0.304352  |
| H | 3.586208  | 2.995173  | -0.962469 |
| C | 0.360180  | 1.861111  | -1.877169 |
| C | 1.904481  | 1.766240  | -1.514568 |
| O | 1.926733  | 1.143401  | -0.240157 |
| H | -1.221585 | 0.778172  | -2.863054 |
| C | -0.123344 | 0.730502  | -2.793547 |
| H | 0.281161  | 0.832229  | -3.811835 |
| H | 0.157572  | -0.257891 | -2.407175 |
| H | 2.663210  | 1.336698  | -3.516069 |
| C | 2.714992  | 0.923238  | -2.496709 |
| H | 3.773217  | 0.915775  | -2.191785 |
| H | 2.356419  | -0.113387 | -2.509049 |

74

Figure 2\_ts(TB) / electronic energy: -3000.72314236 a.u. / lowest freq: -71.58 cm<sup>-1</sup>

|    |           |           |           |
|----|-----------|-----------|-----------|
| H  | -4.448283 | 1.831801  | -0.546545 |
| H  | -6.034945 | -0.274227 | -0.136759 |
| H  | -3.216551 | -3.476593 | 1.843614  |
| H  | -5.506494 | -2.318901 | 0.990513  |
| H  | -2.733610 | 1.438777  | -0.890484 |
| H  | -1.787148 | -3.089113 | 0.837440  |
| C  | -3.773199 | 1.128838  | -1.061090 |
| C  | -2.995601 | -1.009119 | -0.092528 |
| N  | -3.958927 | -0.208011 | -0.557112 |
| N  | -3.547831 | -2.188579 | 0.211178  |
| C  | -2.863967 | -3.303706 | 0.812657  |
| C  | -5.261789 | -0.864729 | -0.651030 |
| C  | -4.996322 | -2.217748 | 0.017945  |
| H  | -3.991266 | 1.174517  | -2.142029 |
| H  | -5.558704 | -0.964972 | -1.708457 |
| H  | -3.032398 | -4.223784 | 0.230395  |
| H  | -5.289878 | -3.073253 | -0.608926 |
| H  | -1.889619 | 3.082951  | 1.743967  |
| H  | -0.475447 | 3.841768  | 0.978387  |
| O  | 0.012370  | 1.213800  | 1.663904  |
| C  | -0.874460 | 3.464722  | 1.930869  |
| H  | -0.944087 | 4.308818  | 2.634747  |
| C  | 0.013393  | 2.358438  | 2.507367  |
| H  | -1.580508 | 1.488051  | 3.697900  |
| H  | 1.869593  | 3.236060  | 1.766788  |
| C  | -0.558425 | 1.872271  | 3.838323  |
| C  | 1.443340  | 2.866966  | 2.709358  |
| H  | 0.060226  | 1.055179  | 4.239327  |
| H  | -0.588936 | 2.683719  | 4.581426  |
| H  | 2.086995  | 2.051714  | 3.072839  |
| H  | 1.463920  | 3.684030  | 3.447489  |
| Cu | -1.064796 | -0.614475 | 0.066837  |
| H  | 4.152179  | -1.222790 | -1.601625 |
| H  | 4.926631  | -1.208560 | 0.732258  |
| H  | 3.609618  | -0.050027 | 0.333136  |
| C  | 3.901707  | -0.891709 | 0.976936  |
| H  | 4.666629  | -2.898230 | -1.268204 |
| H  | 3.893798  | -0.529670 | 2.016219  |
| C  | 3.817631  | -2.267672 | -1.575410 |
| H  | 3.534087  | -2.557519 | -2.598835 |
| C  | 2.634973  | -2.459067 | -0.637358 |
| C  | 2.900430  | -2.039896 | 0.849730  |
| O  | 1.576663  | -1.571157 | -1.014383 |
| H  | 4.231911  | -3.656063 | 1.429621  |
| B  | 0.913650  | -1.122778 | 0.130318  |
| H  | 3.464389  | -2.800114 | 2.789141  |
| C  | 3.297763  | -3.183901 | 1.771368  |
| O  | 1.621543  | -1.531095 | 1.251149  |
| H  | 2.864132  | -4.640428 | -0.558217 |
| C  | 2.093462  | -3.884147 | -0.768821 |
| H  | 1.733821  | -4.037022 | -1.797388 |
| H  | 2.516389  | -3.953389 | 1.826435  |
| H  | 1.245776  | -4.049768 | -0.087193 |
| H  | -0.420230 | 4.054241  | -1.831844 |
| H  | 1.344645  | 4.063200  | -0.458545 |
| H  | -1.457836 | 3.001197  | -2.817127 |
| C  | -0.416657 | 3.197554  | -2.518434 |
| O  | -0.527086 | 1.723785  | -0.642973 |
| H  | 2.129607  | 4.141849  | -2.060330 |
| C  | 2.062456  | 3.564957  | -1.125973 |

|   |           |           |           |
|---|-----------|-----------|-----------|
| H | 0.146515  | 3.473608  | -3.422999 |
| B | 0.378612  | 1.188218  | 0.318412  |
| H | 3.048455  | 3.588701  | -0.638400 |
| C | 0.169014  | 1.950819  | -1.865317 |
| C | 1.669377  | 2.108377  | -1.380171 |
| O | 1.690769  | 1.442805  | -0.120721 |
| H | -1.129452 | 0.602593  | -2.935045 |
| C | -0.047937 | 0.753365  | -2.794138 |
| H | 0.399213  | 0.929741  | -3.783876 |
| H | 0.379967  | -0.167761 | -2.378157 |
| H | 2.645391  | 1.898337  | -3.314327 |
| C | 2.688765  | 1.457115  | -2.306623 |
| H | 3.703702  | 1.618116  | -1.911727 |
| H | 2.515077  | 0.376425  | -2.376759 |

74

Figure 2\_prod / electronic energy: -3000.74272641 a.u. / lowest freq: 20.41 cm<sup>-1</sup>

|    |           |           |           |
|----|-----------|-----------|-----------|
| H  | -3.886200 | 1.904460  | 0.040425  |
| H  | -5.783170 | -0.000028 | 0.231301  |
| H  | -3.671290 | -4.009664 | 0.712028  |
| H  | -5.779110 | -2.391811 | 0.307129  |
| H  | -2.431530 | 1.418920  | -0.867743 |
| H  | -2.156883 | -3.467472 | -0.075581 |
| C  | -3.521445 | 1.318515  | -0.819820 |
| C  | -3.044171 | -1.083929 | -0.477400 |
| N  | -3.884978 | -0.068040 | -0.690769 |
| N  | -3.774686 | -2.199854 | -0.351226 |
| C  | -3.248139 | -3.529587 | -0.185304 |
| C  | -5.293235 | -0.458612 | -0.643950 |
| C  | -5.207063 | -1.984777 | -0.540404 |
| H  | -3.958179 | 1.745967  | -1.737311 |
| H  | -5.823136 | -0.116425 | -1.545676 |
| H  | -3.484024 | -4.160187 | -1.059528 |
| H  | -5.550488 | -2.493752 | -1.456806 |
| H  | -0.953241 | 3.764861  | 3.357981  |
| H  | 0.759299  | 3.428938  | 2.975556  |
| O  | -0.875512 | 1.986080  | 1.406417  |
| C  | -0.148430 | 3.018702  | 3.444873  |
| H  | 0.062558  | 2.860737  | 4.513442  |
| C  | -0.552175 | 1.706030  | 2.774674  |
| H  | -2.662097 | 1.885852  | 3.254227  |
| H  | 1.522396  | 1.080215  | 2.546667  |
| C  | -1.843289 | 1.160855  | 3.378161  |
| C  | 0.563820  | 0.669955  | 2.888868  |
| H  | -2.130100 | 0.224690  | 2.875511  |
| H  | -1.717424 | 0.955828  | 4.451620  |
| H  | 0.344931  | -0.216712 | 2.276614  |
| H  | 0.673948  | 0.353697  | 3.937508  |
| Cu | -1.061912 | -1.136593 | -0.315311 |
| H  | 4.402647  | -0.650240 | -0.989617 |
| H  | 4.621398  | -1.002509 | 1.402523  |
| H  | 3.160136  | -0.085512 | 0.918287  |
| C  | 3.522073  | -0.979220 | 1.447740  |
| H  | 5.192444  | -2.244337 | -0.885959 |
| H  | 3.226802  | -0.887955 | 2.503535  |
| C  | 4.303465  | -1.709747 | -1.255594 |
| H  | 4.297891  | -1.782907 | -2.353926 |
| C  | 3.032949  | -2.326933 | -0.689967 |
| C  | 2.899711  | -2.248976 | 0.864652  |
| O  | 1.888776  | -1.577832 | -1.121179 |
| H  | 4.481998  | -3.631811 | 1.423538  |
| B  | 0.903669  | -1.611522 | -0.123564 |
| H  | 3.275879  | -3.326507 | 2.696880  |
| C  | 3.409346  | -3.471239 | 1.614104  |
| O  | 1.480199  | -2.146878 | 1.031772  |
| H  | 3.743816  | -4.379616 | -1.009699 |
| C  | 2.869341  | -3.749566 | -1.231268 |
| H  | 2.746510  | -3.702507 | -2.323658 |
| H  | 2.863688  | -4.380535 | 1.328701  |
| H  | 1.973529  | -4.232021 | -0.812859 |
| H  | 0.385110  | 4.774697  | -2.173196 |
| H  | 1.496802  | 4.695314  | -0.164989 |
| H  | -0.507126 | 3.734422  | -3.303777 |
| C  | 0.419699  | 3.821781  | -2.717391 |
| O  | -0.524972 | 2.690348  | -0.813439 |
| H  | 2.757526  | 4.544486  | -1.420219 |
| C  | 2.313155  | 4.059293  | -0.539290 |
| H  | 1.265214  | 3.846315  | -3.421248 |
| B  | -0.030339 | 2.224887  | 0.383639  |
| H  | 3.082788  | 4.000577  | 0.244528  |
| C  | 0.538550  | 2.632846  | -1.776365 |
| C  | 1.822046  | 2.649090  | -0.858748 |
| O  | 1.334459  | 2.085967  | 0.372262  |
| H  | -0.612874 | 1.326243  | -3.039970 |
| C  | 0.375562  | 1.330242  | -2.556106 |
| H  | 1.139110  | 1.225440  | -3.340341 |
| H  | 0.434150  | 0.455202  | -1.891068 |
| H  | 3.294722  | 2.132517  | -2.363615 |
| C  | 2.962520  | 1.788006  | -1.372089 |
| H  | 3.820345  | 1.859265  | -0.686128 |
| H  | 2.658330  | 0.735648  | -1.440404 |

39

Figure 2\_I-Cu-Bpin / electronic energy: -2356.95154150 a.u. / lowest freq: 22.11 cm<sup>-1</sup>

|   |           |           |           |
|---|-----------|-----------|-----------|
| H | -4.270736 | -2.604302 | 0.699216  |
| H | -3.469511 | -2.304962 | -1.601614 |
| C | -4.343959 | -1.520428 | 0.875987  |
| H | -4.082488 | -1.334048 | 1.925984  |
| H | -5.392484 | -1.222875 | 0.718439  |

|    |           |           |           |
|----|-----------|-----------|-----------|
| C  | -3.691752 | -1.230867 | -1.514808 |
| O  | -2.057742 | -1.109903 | 0.223326  |
| H  | -4.742108 | -1.073870 | -1.802677 |
| C  | -3.418948 | -0.778798 | -0.078579 |
| H  | -3.048558 | -0.694945 | -2.228327 |
| B  | -1.238080 | -0.000001 | -0.000001 |
| H  | -3.048552 | 0.694945  | 2.228328  |
| C  | -3.418947 | 0.778799  | 0.078581  |
| H  | -4.742104 | 1.073871  | 1.802681  |
| O  | -2.057741 | 1.109902  | -0.223328 |
| C  | -3.691747 | 1.230867  | 1.514810  |
| H  | -5.392484 | 1.222879  | -0.718433 |
| H  | -4.082491 | 1.334050  | -1.925981 |
| C  | -4.343959 | 1.520430  | -0.875984 |
| H  | -3.469505 | 2.304963  | 1.601615  |
| H  | -4.270733 | 2.604304  | -0.699213 |
| Cu | 0.797333  | -0.000001 | -0.000002 |
| H  | 3.463333  | -3.022428 | -0.742996 |
| H  | 5.468944  | -1.227903 | -0.850209 |
| H  | 5.489479  | 1.160908  | -0.929040 |
| H  | 3.459252  | 2.934328  | -1.042286 |
| C  | 3.103330  | -2.441738 | 0.122397  |
| C  | 4.991258  | -0.767023 | 0.029199  |
| H  | 2.005088  | -2.444141 | 0.118745  |
| N  | 3.563409  | -1.079451 | 0.055881  |
| C  | 2.777376  | 0.000000  | 0.000000  |
| C  | 4.991258  | 0.767025  | -0.029195 |
| N  | 3.563409  | 1.079451  | -0.055879 |
| H  | 2.005087  | 2.444141  | -0.118746 |
| C  | 3.103329  | 2.441739  | -0.122398 |
| H  | 3.459253  | -2.934329 | 1.042284  |
| H  | 5.489478  | -1.160906 | 0.929045  |
| H  | 5.468941  | 1.227905  | 0.850214  |
| H  | 3.463332  | 3.022430  | 0.742995  |

55

Figure 2\_para-H\_pcl / electronic energy: -2666.30230457 a.u. / lowest freq: 20.52 cm-1

|    |           |           |           |
|----|-----------|-----------|-----------|
| H  | 1.497496  | -0.326859 | 3.292186  |
| H  | 2.890504  | -2.532612 | 2.713480  |
| H  | 2.465512  | -4.090744 | 0.944336  |
| H  | 1.070010  | -4.085537 | -1.389616 |
| C  | 1.651877  | -0.024496 | 2.244220  |
| C  | 2.997105  | -2.092815 | 1.710777  |
| H  | 0.745545  | 0.481256  | 1.886021  |
| N  | 1.897628  | -1.177265 | 1.418098  |
| C  | 1.337347  | -1.393685 | 0.224107  |
| C  | 2.864564  | -3.126210 | 0.586153  |
| N  | 1.905301  | -2.482362 | -0.308166 |
| H  | 0.774936  | -2.449913 | -2.046755 |
| C  | 1.517721  | -3.090393 | -1.552696 |
| H  | 2.495375  | 0.685935  | 2.204757  |
| H  | 3.957787  | -1.550477 | 1.675054  |
| H  | 3.815561  | -3.322200 | 0.068585  |
| H  | 2.386157  | -3.207011 | -2.221195 |
| H  | 5.122260  | 2.896464  | 1.494191  |
| H  | 2.931241  | 4.038088  | 1.146047  |
| C  | 4.386411  | 2.479658  | 0.802547  |
| C  | 3.160089  | 3.115294  | 0.606694  |
| H  | 5.619289  | 0.794422  | 0.239794  |
| C  | 4.662122  | 1.303689  | 0.099924  |
| H  | -4.224090 | 2.362879  | 2.120738  |
| C  | 2.128213  | 2.584749  | -0.273613 |
| H  | -3.358296 | 0.258406  | 3.039257  |
| H  | 1.264744  | 3.101212  | -0.405757 |
| C  | 3.722660  | 0.775268  | -0.780256 |
| C  | 2.478524  | 1.400269  | -0.984675 |
| C  | -4.575680 | 1.885536  | 1.193494  |
| C  | -3.858525 | -0.275142 | 2.217133  |
| H  | -4.431193 | 2.600983  | 0.373004  |
| O  | -2.429952 | 0.898603  | 0.705386  |
| H  | 3.941837  | -0.153639 | -1.314987 |
| H  | -4.891913 | -0.491119 | 2.527273  |
| H  | -5.653731 | 1.689327  | 1.302267  |
| C  | -3.807817 | 0.593016  | 0.958050  |
| C  | 1.497634  | 0.778894  | -1.896203 |
| B  | -1.908675 | -0.016368 | -0.210962 |
| H  | -0.135793 | 2.216476  | -1.755575 |
| C  | 0.212357  | 1.256771  | -2.146954 |
| C  | -4.209439 | -0.187342 | -0.337611 |
| H  | -3.938407 | 1.554022  | -1.623985 |
| O  | -2.959959 | -0.769493 | -0.734702 |
| H  | -5.650718 | 1.174446  | -1.280926 |
| H  | -6.180463 | -0.874848 | 0.265479  |
| C  | -4.659234 | 0.736977  | -1.471038 |
| H  | -0.334686 | 0.889777  | -3.019996 |
| C  | -5.238964 | -1.288260 | -0.128726 |
| H  | -4.713811 | 0.158051  | -2.405185 |
| H  | -5.459971 | -1.780935 | -1.087659 |
| Cu | 0.075996  | -0.160929 | -0.680632 |
| H  | 1.899315  | -0.008001 | -2.543520 |
| H  | -3.331293 | -1.228870 | 2.065691  |
| H  | -4.876695 | -2.056365 | 0.567182  |

55

Figure 2\_para-H\_ts(CuBadd) / electronic energy: -2666.29368708 a.u. / lowest freq: -166.19 cm-1

|   |          |           |           |
|---|----------|-----------|-----------|
| H | 0.996475 | -1.288793 | 3.261287  |
| H | 1.959935 | -3.624569 | 2.587431  |
| H | 1.579873 | -4.781718 | 0.519138  |
| H | 0.787005 | -4.074678 | -2.019439 |



|    |           |           |           |
|----|-----------|-----------|-----------|
| C  | 1.381123  | -0.872486 | 2.317415  |
| C  | 2.382948  | -3.113002 | 1.710812  |
| H  | 0.636879  | -0.172541 | 1.913544  |
| N  | 1.597853  | -1.930709 | 1.364808  |
| C  | 1.340979  | -1.847726 | 0.054545  |
| C  | 2.292418  | -3.943466 | 0.427021  |
| N  | 1.790126  | -2.963301 | -0.532901 |
| H  | 1.266827  | -2.406685 | -2.461225 |
| C  | 1.573954  | -3.308038 | -1.913110 |
| H  | 2.312167  | -0.320206 | 2.530824  |
| H  | 3.420643  | -2.822561 | 1.950210  |
| H  | 3.261894  | -4.351495 | 0.106596  |
| H  | 2.500593  | -3.696104 | -2.363703 |
| H  | 4.156558  | 3.930126  | 1.867465  |
| H  | 1.729312  | 3.484945  | 2.267247  |
| C  | 3.557859  | 3.403369  | 1.120711  |
| C  | 2.201890  | 3.153089  | 1.337996  |
| H  | 5.191316  | 3.157646  | -0.275991 |
| C  | 4.131796  | 2.968495  | -0.079799 |
| H  | -3.384870 | 1.863720  | 2.629112  |
| C  | 1.432753  | 2.482762  | 0.388625  |
| H  | -2.665478 | -0.467535 | 2.859602  |
| H  | 0.378053  | 2.288590  | 0.603582  |
| C  | 3.372194  | 2.299769  | -1.031825 |
| C  | 1.996487  | 2.025021  | -0.830391 |
| C  | -3.836801 | 1.690453  | 1.640966  |
| C  | -3.250868 | -0.717613 | 1.962229  |
| H  | -3.682666 | 2.594499  | 1.037507  |
| O  | -1.823604 | 0.736803  | 0.715336  |
| H  | 3.844409  | 1.967898  | -1.961584 |
| H  | -4.278639 | -0.949741 | 2.277203  |
| H  | -4.918002 | 1.542328  | 1.784589  |
| C  | -3.207639 | 0.466163  | 0.995793  |
| C  | 1.223894  | 1.289151  | -1.816475 |
| B  | -1.477276 | 0.064623  | -0.447421 |
| H  | -0.753453 | 2.044882  | -1.243659 |
| C  | -0.233039 | 1.216079  | -1.745091 |
| C  | -3.763535 | 0.114089  | -0.428724 |
| H  | -3.397141 | 2.118927  | -1.214100 |
| O  | -2.598160 | -0.430603 | -1.078847 |
| H  | -5.108968 | 1.793195  | -0.830097 |
| H  | -5.747144 | -0.567079 | 0.124761  |
| C  | -4.183217 | 1.349163  | -1.224314 |
| H  | -0.731487 | 0.947278  | -2.684329 |
| C  | -4.874289 | -0.923269 | -0.443440 |
| H  | -4.359634 | 1.060007  | -2.270875 |
| H  | -5.197184 | -1.109090 | -1.478710 |
| Cu | 0.470780  | -0.366854 | -0.813045 |
| H  | 1.712563  | 1.068679  | -2.769873 |
| H  | -2.808359 | -1.619026 | 1.512320  |
| H  | -4.542906 | -1.878784 | -0.016344 |

55

Figure 2\_para-H\_L-Cu-alkyl\_01 / electronic energy: -2666.34950794 a.u. / lowest freq: 22.15 cm-1

|   |           |           |           |
|---|-----------|-----------|-----------|
| H | 0.339344  | -1.817615 | 2.748346  |
| H | -2.108589 | -2.844145 | 2.488715  |
| H | -3.694707 | -3.077129 | 0.708339  |
| H | -3.672137 | -1.764181 | -1.598009 |
| C | 0.600861  | -2.421786 | 1.862755  |
| C | -1.710559 | -3.402420 | 1.624157  |
| H | 1.331917  | -1.864786 | 1.261647  |
| N | -0.564614 | -2.691971 | 1.059896  |
| C | -0.816931 | -2.159207 | -0.141633 |
| C | -2.687657 | -3.432860 | 0.443923  |
| N | -2.050214 | -2.524933 | -0.507097 |
| H | -2.053103 | -1.480750 | -2.299426 |
| C | -2.677215 | -2.207202 | -1.763246 |
| H | 1.062705  | -3.360513 | 2.207225  |
| H | -1.422116 | -4.405431 | 1.971383  |
| H | -2.787430 | -4.437993 | 0.000844  |
| H | -2.798060 | -3.108081 | -2.388082 |
| H | 5.572884  | -0.201789 | 1.928040  |
| H | 3.972471  | 1.710127  | 2.112696  |
| C | 4.788943  | -0.057682 | 1.180623  |
| C | 3.892974  | 1.005805  | 1.278943  |
| H | 5.360404  | -1.769285 | -0.013669 |
| C | 4.663284  | -0.933068 | 0.095135  |
| H | -0.672135 | 3.544931  | 2.768710  |
| C | 2.890226  | 1.195249  | 0.325943  |
| H | 0.118845  | 1.260027  | 2.467666  |
| H | 2.192919  | 2.025046  | 0.451149  |
| C | 3.664464  | -0.748601 | -0.853465 |
| C | 2.730614  | 0.315769  | -0.769611 |
| C | -1.478283 | 3.434587  | 2.028192  |
| C | -0.761267 | 1.044755  | 1.844193  |
| H | -1.591561 | 4.393836  | 1.506560  |
| O | 0.001823  | 2.669271  | 0.281328  |
| H | 3.585120  | -1.451789 | -1.689346 |
| H | -1.574567 | 0.701007  | 2.499647  |
| H | -2.410464 | 3.218481  | 2.572034  |
| C | -1.144564 | 2.305347  | 1.067937  |
| C | 1.642447  | 0.437343  | -1.768783 |
| B | -0.138216 | 2.089405  | -0.958162 |
| H | 1.795428  | 2.646955  | -1.923411 |
| C | 1.028719  | 1.847771  | -1.977177 |
| C | -2.229259 | 2.038884  | -0.040069 |
| H | -2.319748 | 4.131151  | -0.657793 |
| O | -1.426390 | 1.658277  | -1.169295 |

|    |           |           |           |
|----|-----------|-----------|-----------|
| H  | -3.695811 | 3.611962  | 0.355854  |
| H  | -3.737814 | 1.115803  | 1.218529  |
| C  | -3.000719 | 3.296191  | -0.435495 |
| H  | 0.602941  | 1.889622  | -2.993685 |
| C  | -3.194887 | 0.909185  | 0.283597  |
| H  | -3.585500 | 3.085993  | -1.343239 |
| H  | -3.936418 | 0.809039  | -0.523040 |
| Cu | 0.360673  | -0.901507 | -1.045933 |
| H  | 2.011507  | 0.044107  | -2.732487 |
| H  | -0.493012 | 0.230566  | 1.153375  |
| H  | -2.668550 | -0.048884 | 0.382931  |

55

Figure 2\_para-H\_L-Cu-alkyl\_02 / electronic energy: -2666.34283721 a.u. / lowest freq: 16.64 cm-1

|    |           |           |           |
|----|-----------|-----------|-----------|
| B  | -2.265439 | -1.181273 | 0.352358  |
| O  | -3.062031 | -0.796138 | 1.400932  |
| O  | -2.967355 | -1.248144 | -0.826317 |
| C  | -4.421053 | -0.723346 | 0.936317  |
| C  | -4.235238 | -0.603745 | -0.622360 |
| C  | -5.103780 | 0.470820  | 1.584751  |
| C  | -5.112423 | -2.018378 | 1.360062  |
| C  | -4.085491 | 0.841419  | -1.100028 |
| C  | -5.299154 | -1.314490 | -1.444448 |
| H  | -3.325994 | 1.384259  | -0.518198 |
| H  | -5.037110 | 1.389033  | -1.037386 |
| H  | -3.759588 | 0.835874  | -2.150509 |
| H  | -5.315918 | -2.394278 | -1.246610 |
| H  | -5.097322 | -1.170465 | -2.516319 |
| H  | -6.296323 | -0.901148 | -1.229829 |
| H  | -4.644207 | -2.896649 | 0.891190  |
| H  | -6.181489 | -2.012200 | 1.102083  |
| H  | -5.023549 | -2.131434 | 2.450718  |
| H  | -6.109812 | 0.619000  | 1.163525  |
| H  | -4.525092 | 1.392920  | 1.443089  |
| H  | -5.210955 | 0.299538  | 2.666261  |
| C  | -0.332484 | 1.690407  | -1.660479 |
| C  | -0.690944 | 3.034084  | -1.639744 |
| C  | -0.321965 | 0.896829  | -0.489527 |
| C  | -1.060906 | 3.655944  | -0.442659 |
| C  | -0.698709 | 1.549216  | 0.706483  |
| C  | -1.059301 | 2.896592  | 0.727933  |
| C  | 0.069278  | -0.534706 | -0.530037 |
| C  | -0.718021 | -1.443452 | 0.451206  |
| H  | -1.348118 | 3.358127  | 1.676942  |
| H  | -0.719503 | 0.984286  | 1.641600  |
| H  | -1.346755 | 4.710406  | -0.425457 |
| H  | -0.691972 | 3.603911  | -2.573735 |
| H  | -0.058742 | 1.223149  | -2.612039 |
| Cu | 2.023063  | -0.508455 | -0.227807 |
| H  | -0.389286 | -1.323109 | 1.498056  |
| H  | -0.505838 | -2.499262 | 0.204974  |
| H  | -0.107953 | -0.902128 | -1.556423 |
| H  | 5.048663  | -3.271556 | -0.779903 |
| H  | 6.766280  | -1.641204 | 0.501124  |
| C  | 4.645897  | -2.347059 | -1.224557 |
| H  | 3.564247  | -2.464823 | -1.372792 |
| H  | 6.262797  | 0.173077  | 1.977441  |
| N  | 4.876656  | -1.220263 | -0.359327 |
| C  | 6.233857  | -0.816253 | 0.003587  |
| H  | 5.126059  | -2.197624 | -2.206257 |
| C  | 3.934680  | -0.392782 | 0.103836  |
| C  | 5.982379  | 0.379575  | 0.931394  |
| H  | 4.032160  | 1.529497  | 2.621932  |
| H  | 6.802510  | -0.541775 | -0.900301 |
| N  | 4.535734  | 0.558619  | 0.825089  |
| C  | 3.867020  | 1.617871  | 1.535098  |
| H  | 6.512820  | 1.289649  | 0.612271  |
| H  | 2.789328  | 1.557526  | 1.333528  |
| H  | 4.235551  | 2.603455  | 1.207430  |

55

Figure 2\_para-H\_L-Cu-alkyl\_03 / electronic energy: -2666.34484998 a.u. / lowest freq: 19.00 cm-1

|   |           |           |           |
|---|-----------|-----------|-----------|
| B | -1.896435 | -1.314222 | -0.258172 |
| O | -3.049880 | -1.734910 | -0.875379 |
| O | -2.134367 | -0.262728 | 0.595169  |
| C | -4.081576 | -0.772963 | -0.596605 |
| C | -3.560521 | -0.113846 | 0.730262  |
| C | -5.416558 | -1.487764 | -0.469835 |
| C | -4.114110 | 0.202582  | -1.773010 |
| C | -3.972812 | -0.886281 | 1.982804  |
| C | -3.908074 | 1.357070  | 0.889075  |
| H | -3.752120 | -1.959637 | 1.884291  |
| H | -5.045047 | -0.768726 | 2.196048  |
| H | -3.407014 | -0.501294 | 2.843812  |
| H | -3.525023 | 1.963166  | 0.058679  |
| H | -3.477219 | 1.745239  | 1.823958  |
| H | -4.999536 | 1.489735  | 0.939279  |
| H | -3.160230 | 0.742831  | -1.871267 |
| H | -4.923961 | 0.939532  | -1.671580 |
| H | -4.278676 | -0.362077 | -2.702411 |
| H | -6.206534 | -0.781158 | -0.173721 |
| H | -5.375232 | -2.297771 | 0.269773  |
| H | -5.698529 | -1.926775 | -1.438283 |
| C | 2.897005  | -2.308278 | 1.229954  |
| C | 4.124538  | -2.940134 | 1.076536  |
| C | 1.926706  | -2.280591 | 0.195897  |
| C | 4.451110  | -3.586655 | -0.122215 |
| C | 2.274041  | -2.957261 | -0.994955 |
| C | 3.510856  | -3.587165 | -1.150962 |

|    |           |           |           |
|----|-----------|-----------|-----------|
| C  | 0.647310  | -1.560086 | 0.380249  |
| C  | -0.503054 | -1.975714 | -0.538921 |
| H  | 3.735990  | -4.093848 | -2.094344 |
| H  | 1.561373  | -2.986910 | -1.822416 |
| H  | 5.416882  | -4.082659 | -0.245087 |
| H  | 4.841117  | -2.932913 | 1.903349  |
| H  | 2.668095  | -1.803771 | 2.174738  |
| Cu | 1.078943  | 0.363586  | 0.188298  |
| H  | -0.669195 | -3.076960 | -0.548441 |
| H  | -0.285964 | -1.741620 | -1.600102 |
| H  | 0.337765  | -1.652488 | 1.437988  |
| H  | -1.356308 | 3.348647  | -0.903306 |
| H  | 0.794565  | 4.966093  | -1.256393 |
| C  | -0.851479 | 3.048723  | 0.030878  |
| H  | -1.063763 | 1.988957  | 0.227912  |
| H  | 3.153264  | 4.572555  | -1.240032 |
| N  | 0.573194  | 3.231030  | -0.070188 |
| C  | 1.153509  | 4.552188  | -0.299813 |
| H  | -1.265142 | 3.653106  | 0.854677  |
| C  | 1.480727  | 2.250218  | -0.032816 |
| C  | 2.658861  | 4.252977  | -0.309714 |
| H  | 4.469982  | 2.208687  | -1.137097 |
| H  | 0.860529  | 5.249603  | 0.500062  |
| N  | 2.690851  | 2.797145  | -0.182485 |
| C  | 3.940146  | 2.081971  | -0.178734 |
| H  | 3.190748  | 4.721381  | 0.534365  |
| H  | 3.740675  | 1.013684  | -0.022213 |
| H  | 4.597253  | 2.442420  | 0.629918  |

55

Figure 2 para-H\_ts(BHE) / electronic energy: -2666.29763823 a.u. / lowest freq: -918.55 cm<sup>-1</sup>

|    |           |           |           |
|----|-----------|-----------|-----------|
| B  | -2.024988 | 0.866085  | 0.278234  |
| O  | -3.082376 | 1.145392  | 1.100024  |
| O  | -2.389780 | 0.143865  | -0.826164 |
| C  | -4.193997 | 0.340737  | 0.659263  |
| C  | -3.827794 | 0.066538  | -0.847103 |
| C  | -5.486046 | 1.112075  | 0.869676  |
| C  | -4.187780 | -0.927296 | 1.511514  |
| C  | -4.321971 | 1.159051  | -1.793087 |
| C  | -4.245188 | -1.301657 | -1.361740 |
| H  | -4.049257 | 2.160956  | -1.429392 |
| H  | -5.412952 | 1.118820  | -1.923959 |
| H  | -3.852583 | 1.018339  | -2.777839 |
| H  | -3.758097 | -2.112362 | -0.803919 |
| H  | -3.965793 | -1.404532 | -2.420797 |
| H  | -5.335542 | -1.429108 | -1.285473 |
| H  | -3.253463 | -1.493078 | 1.377828  |
| H  | -5.034834 | -1.584705 | 1.268659  |
| H  | -4.262589 | -0.647626 | 2.572519  |
| H  | -6.341096 | 0.556245  | 0.456368  |
| H  | -5.449410 | 2.101987  | 0.397021  |
| H  | -5.662741 | 1.257329  | 1.945634  |
| C  | 2.428800  | 2.542442  | -1.465395 |
| C  | 3.670372  | 3.151149  | -1.331944 |
| C  | 1.647577  | 2.183431  | -0.338057 |
| C  | 4.196810  | 3.440840  | -0.067456 |
| C  | 2.195941  | 2.496086  | 0.931926  |
| C  | 3.440957  | 3.109175  | 1.057994  |
| C  | 0.376916  | 1.499323  | -0.502940 |
| C  | -0.555000 | 1.288347  | 0.585952  |
| H  | 3.829206  | 3.325241  | 2.057660  |
| H  | 1.644866  | 2.234140  | 1.838896  |
| H  | 5.173365  | 3.919360  | 0.035854  |
| H  | 4.240368  | 3.405968  | -2.230330 |
| H  | 2.040889  | 2.321684  | -2.464471 |
| Cu | 0.670287  | -0.340609 | 0.434991  |
| H  | -0.459943 | 1.941408  | 1.462525  |
| H  | -0.432956 | 0.000737  | 1.554103  |
| H  | 0.028642  | 1.333581  | -1.526521 |
| H  | -0.245741 | -4.400352 | 0.285965  |
| H  | 2.348179  | -4.979640 | 0.142437  |
| C  | -0.012908 | -3.487372 | -0.284383 |
| H  | -0.653033 | -2.670995 | 0.076136  |
| H  | 4.143576  | -3.579575 | 0.900183  |
| N  | 1.365032  | -3.115241 | -0.100767 |
| C  | 2.445252  | -4.043097 | -0.425888 |
| H  | -0.240877 | -3.674062 | -1.347982 |
| C  | 1.801298  | -1.872466 | 0.144679  |
| C  | 3.688004  | -3.233692 | -0.043651 |
| H  | 4.510381  | -0.905821 | 1.386035  |
| H  | 2.418975  | -4.291847 | -1.501027 |
| N  | 3.138644  | -1.890812 | 0.126012  |
| C  | 3.996573  | -0.772257 | 0.418702  |
| H  | 4.465820  | -3.244752 | -0.820979 |
| H  | 3.397433  | 0.146453  | 0.459228  |
| H  | 4.760450  | -0.656375 | -0.366226 |

55

Figure 2 para-H\_pc2 / electronic energy: -2666.32935168 a.u. / lowest freq: 30.42 cm<sup>-1</sup>

|   |           |           |           |
|---|-----------|-----------|-----------|
| B | -1.972778 | 1.035248  | 0.009813  |
| O | -3.085630 | 1.512288  | 0.646802  |
| O | -2.248889 | -0.048624 | -0.791319 |
| C | -4.130592 | 0.533387  | 0.481017  |
| C | -3.675799 | -0.224724 | -0.822579 |
| C | -5.467419 | 1.246361  | 0.363810  |
| C | -4.110337 | -0.356306 | 1.722154  |
| C | -4.182128 | 0.430638  | -2.105982 |
| C | -3.988385 | -1.712589 | -0.834835 |
| H | -3.974314 | 1.510964  | -2.116412 |

|    |           |           |           |
|----|-----------|-----------|-----------|
| H  | -5.263317 | 0.281321  | -2.237910 |
| H  | -3.667089 | -0.021589 | -2.966287 |
| H  | -3.501275 | -2.236800 | -0.002282 |
| H  | -3.631099 | -2.159993 | -1.774546 |
| H  | -5.073806 | -1.881944 | -0.769327 |
| H  | -3.144347 | -0.871874 | 1.828659  |
| H  | -4.913609 | -1.106510 | 1.695607  |
| H  | -4.253238 | 0.270673  | 2.614406  |
| H  | -6.270729 | 0.527476  | 0.142684  |
| H  | -5.453343 | 2.011373  | -0.423333 |
| H  | -5.708482 | 1.743135  | 1.315181  |
| C  | 2.795097  | 1.074944  | -1.577032 |
| C  | 4.126036  | 1.484463  | -1.604555 |
| C  | 1.886965  | 1.617213  | -0.652945 |
| C  | 4.581217  | 2.450274  | -0.705019 |
| C  | 2.359049  | 2.587633  | 0.245747  |
| C  | 3.689729  | 2.999071  | 0.218047  |
| C  | 0.495576  | 1.115753  | -0.633082 |
| C  | -0.541342 | 1.601714  | 0.157202  |
| H  | 4.034848  | 3.753902  | 0.928788  |
| H  | 1.682326  | 3.021190  | 0.985380  |
| H  | 5.624605  | 2.773659  | -0.723752 |
| H  | 4.813705  | 1.048185  | -2.333433 |
| H  | 2.446339  | 0.312927  | -2.279803 |
| Cu | 0.256976  | -0.083099 | 1.066855  |
| H  | -0.371627 | 2.455992  | 0.820628  |
| H  | -0.500193 | -0.169922 | 2.467373  |
| H  | 0.245348  | 0.429816  | -1.450498 |
| H  | -0.411960 | -3.700285 | -0.424902 |
| H  | 2.257246  | -4.321893 | -0.135614 |
| C  | -0.017385 | -2.771968 | -0.873082 |
| H  | -0.707814 | -1.946993 | -0.648362 |
| H  | 4.187067  | -3.200186 | 0.738754  |
| N  | 1.290465  | -2.456144 | -0.359224 |
| C  | 2.433150  | -3.335380 | -0.597950 |
| H  | 0.023018  | -2.906901 | -1.965675 |
| C  | 1.554880  | -1.484630 | 0.521354  |
| C  | 3.573360  | -2.568312 | 0.080002  |
| H  | 4.180181  | -1.102273 | 2.398921  |
| H  | 2.596070  | -3.488384 | -1.674866 |
| N  | 2.848821  | -1.555395 | 0.844554  |
| C  | 3.552237  | -0.592586 | 1.651387  |
| H  | 4.244794  | -2.079333 | -0.647185 |
| H  | 2.821490  | 0.036961  | 2.175489  |
| H  | 4.198459  | 0.052648  | 1.031334  |

55

Figure 2 para-H\_ts(H>B) / electronic energy: -2666.31628206 a.u. / lowest freq: -410.68 cm<sup>-1</sup>

|    |           |           |           |
|----|-----------|-----------|-----------|
| B  | -1.954813 | -0.598679 | -0.324418 |
| O  | -3.076397 | -1.109894 | -0.998837 |
| O  | -2.372807 | 0.173881  | 0.783688  |
| C  | -4.205425 | -0.344959 | -0.581502 |
| C  | -3.792709 | 0.082606  | 0.875956  |
| C  | -5.448668 | -1.220805 | -0.652442 |
| C  | -4.367647 | 0.849569  | -1.525312 |
| C  | -4.116398 | -0.994110 | 1.914919  |
| C  | -4.358274 | 1.422431  | 1.326295  |
| H  | -3.735499 | -1.975908 | 1.596284  |
| H  | -5.196972 | -1.081479 | 2.102915  |
| H  | -3.623379 | -0.733372 | 2.863519  |
| H  | -4.009810 | 2.242398  | 0.684327  |
| H  | -4.033621 | 1.638262  | 2.355772  |
| H  | -5.459397 | 1.410032  | 1.315284  |
| H  | -3.507346 | 1.531411  | -1.471019 |
| H  | -5.282495 | 1.420356  | -1.306639 |
| H  | -4.435379 | 0.477140  | -2.558829 |
| H  | -6.319921 | -0.704119 | -0.221068 |
| H  | -5.304943 | -2.171375 | -0.121808 |
| H  | -5.679728 | -1.454033 | -1.703126 |
| C  | 2.752494  | -1.162324 | 1.419993  |
| C  | 4.066997  | -1.622060 | 1.394076  |
| C  | 1.759479  | -1.754143 | 0.621864  |
| C  | 4.418566  | -2.693867 | 0.571332  |
| C  | 2.125363  | -2.837770 | -0.191768 |
| C  | 3.439345  | -3.301020 | -0.216728 |
| C  | 0.393020  | -1.187581 | 0.641520  |
| C  | -0.606709 | -1.419320 | -0.267558 |
| H  | 3.700803  | -4.147908 | -0.856157 |
| H  | 1.372419  | -3.331763 | -0.810357 |
| H  | 4.822469  | -1.141827 | 2.021143  |
| H  | 2.485609  | -0.314074 | 2.057154  |
| Cu | 0.092750  | 0.509303  | -0.795867 |
| H  | -0.387207 | -2.075198 | -1.122415 |
| H  | -1.373487 | 0.579201  | -1.473110 |
| H  | 0.160935  | -0.580800 | 1.526621  |
| H  | 0.717767  | 4.151954  | 1.078253  |
| H  | 3.328194  | 4.025660  | 0.295232  |
| C  | 0.815539  | 3.068365  | 1.257674  |
| H  | -0.132543 | 2.579900  | 0.996140  |
| H  | 4.601186  | 2.574620  | -1.117666 |
| N  | 1.870115  | 2.502436  | 0.458488  |
| C  | 3.250337  | 2.965283  | 0.586615  |
| H  | 1.009676  | 2.910189  | 2.331109  |
| C  | 1.710402  | 1.568461  | -0.483710 |
| C  | 3.999244  | 2.031323  | -0.373610 |
| H  | 3.668968  | 0.648704  | -2.862959 |
| H  | 3.595462  | 2.874503  | 1.627939  |
| N  | 2.908145  | 1.301094  | -1.013483 |

|   |          |           |           |
|---|----------|-----------|-----------|
| C | 3.177667 | 0.251093  | -1.960204 |
| H | 4.664144 | 1.325432  | 0.152526  |
| H | 2.228786 | -0.220094 | -2.249463 |
| H | 3.831869 | -0.518274 | -1.515729 |
| H | 5.447855 | -3.059572 | 0.550047  |

55

Figure 2\_para-H\_int1 / electronic energy: -2666.31795715 a.u. / lowest freq: 20.92 cm-1

|    |           |           |           |
|----|-----------|-----------|-----------|
| B  | 1.931157  | 0.230617  | -0.432330 |
| O  | 3.047512  | 0.700439  | -1.206870 |
| O  | 2.442856  | -0.222279 | 0.843943  |
| C  | 4.220092  | 0.169264  | -0.616489 |
| C  | 3.820444  | 0.101629  | 0.903195  |
| C  | 5.392992  | 1.092155  | -0.922698 |
| C  | 4.494573  | -1.219520 | -1.206081 |
| C  | 3.968083  | 1.460275  | 1.597837  |
| C  | 4.558279  | -0.965339 | 1.703012  |
| H  | 3.481565  | 2.255341  | 1.013261  |
| H  | 5.020814  | 1.736920  | 1.762411  |
| H  | 3.470447  | 1.411396  | 2.578461  |
| H  | 4.352411  | -1.971757 | 1.314259  |
| H  | 4.231532  | -0.938932 | 2.754296  |
| H  | 5.646753  | -0.797045 | 1.683475  |
| H  | 3.695698  | -1.930642 | -0.949525 |
| H  | 5.453089  | -1.635469 | -0.860223 |
| H  | 4.533448  | -1.135993 | -2.303052 |
| H  | 6.297072  | 0.784977  | -0.373661 |
| H  | 5.161048  | 2.134121  | -0.663406 |
| H  | 5.623563  | 1.059962  | -1.999018 |
| C  | -2.602835 | 1.494976  | 1.400656  |
| C  | -3.876556 | 2.057983  | 1.350683  |
| C  | -1.581687 | 1.934267  | 0.542846  |
| C  | -4.152801 | 3.084883  | 0.446756  |
| C  | -1.869978 | 2.978235  | -0.350072 |
| C  | -3.140892 | 3.546658  | -0.397426 |
| C  | -0.273264 | 1.246348  | 0.574217  |
| C  | 0.650086  | 1.204502  | -0.420303 |
| H  | -3.343919 | 4.359322  | -1.099312 |
| H  | -1.087827 | 3.353445  | -1.014456 |
| H  | -4.657632 | 1.694187  | 2.023075  |
| H  | -2.393210 | 0.685518  | 2.105745  |
| Cu | -0.114916 | -0.848792 | -0.671688 |
| H  | 0.417545  | 1.746238  | -1.350634 |
| H  | 1.475805  | -0.940908 | -1.102253 |
| H  | -0.054507 | 0.714022  | 1.509964  |
| H  | -1.368290 | -4.442887 | 1.126854  |
| H  | -3.868640 | -3.882106 | 0.330029  |
| C  | -1.256247 | -3.360485 | 1.302346  |
| H  | -0.232862 | -3.063302 | 1.037716  |
| H  | -4.787834 | -2.284795 | -1.193137 |
| N  | -2.185532 | -2.613111 | 0.496657  |
| C  | -3.625678 | -2.842327 | 0.601689  |
| H  | -1.417129 | -3.165185 | 2.375417  |
| C  | -1.862867 | -1.666074 | -0.388178 |
| C  | -4.197547 | -1.818401 | -0.388990 |
| H  | -3.567588 | -0.450295 | -2.808398 |
| H  | -3.967549 | -2.674702 | 1.635121  |
| N  | -2.991148 | -1.197530 | -0.929225 |
| C  | -3.072767 | -0.120533 | -1.880304 |
| H  | -4.829474 | -1.058409 | 0.098469  |
| H  | -2.054842 | 0.216561  | -2.119083 |
| H  | -3.638389 | 0.729110  | -1.463039 |
| H  | -5.149069 | 3.531439  | 0.406476  |

55

Figure 2\_para-H\_ts(Cu&gt;0) / electronic energy: -2666.31305334 a.u. / lowest freq: -46.48 cm-1

|   |           |           |           |
|---|-----------|-----------|-----------|
| B | -1.327490 | -1.078768 | -0.725626 |
| O | -2.441997 | -1.893621 | -1.112160 |
| O | -1.648254 | -0.515211 | 0.584512  |
| C | -3.571480 | -1.432037 | -0.391168 |
| C | -2.936803 | -0.968459 | 0.973184  |
| C | -4.575796 | -2.570593 | -0.261467 |
| C | -4.222067 | -0.269284 | -1.152701 |
| C | -2.741273 | -2.133273 | 1.948379  |
| C | -3.684097 | 0.163415  | 1.667764  |
| H | -2.228968 | -2.973640 | 1.456727  |
| H | -3.693182 | -2.495511 | 2.366422  |
| H | -2.108367 | -1.795357 | 2.783075  |
| H | -3.692879 | 1.075408  | 1.054972  |
| H | -3.191230 | 0.407031  | 2.621655  |
| H | -4.725360 | -0.119730 | 1.888408  |
| H | -3.553673 | 0.601681  | -1.213708 |
| H | -5.165932 | 0.050178  | -0.686354 |
| H | -4.439535 | -0.596280 | -2.180881 |
| H | -5.408784 | -2.292399 | 0.403047  |
| H | -4.102076 | -3.480207 | 0.131164  |
| H | -4.997669 | -2.811718 | -1.249299 |
| C | 3.145895  | -2.156634 | 1.382706  |
| C | 4.496103  | -2.503182 | 1.416046  |
| C | 2.439333  | -2.090905 | 0.170552  |
| C | 5.175335  | -2.787267 | 0.231579  |
| C | 3.140894  | -2.375710 | -1.014010 |
| C | 4.489545  | -2.720746 | -0.983500 |
| C | 1.018491  | -1.690067 | 0.185379  |
| C | 0.143729  | -1.705912 | -0.836804 |
| H | 5.013495  | -2.933764 | -1.918771 |
| H | 2.627099  | -2.313881 | -1.976268 |
| H | 5.020694  | -2.550126 | 2.373675  |
| H | 2.621308  | -1.931519 | 2.315752  |

|    |           |           |           |
|----|-----------|-----------|-----------|
| Cu | -0.447472 | 1.042451  | -0.830881 |
| H  | 0.484922  | -2.077122 | -1.814657 |
| H  | -1.324851 | -0.039247 | -1.673700 |
| H  | 0.655828  | -1.321086 | 1.153348  |
| H  | 6.234695  | -3.054172 | 0.252915  |
| H  | -1.380776 | 5.031472  | -0.218694 |
| H  | 3.598645  | 1.789895  | -1.266592 |
| H  | 3.202725  | 4.250418  | -0.310125 |
| H  | 1.231486  | 5.539283  | 0.106949  |
| H  | -1.822279 | 3.300832  | -0.102635 |
| H  | 2.228806  | 0.663266  | -1.031896 |
| C  | 0.633155  | 2.537477  | -0.248222 |
| C  | -1.195817 | 4.092757  | 0.328500  |
| N  | 0.185895  | 3.704045  | 0.223308  |
| C  | 2.830131  | 1.447839  | -0.555110 |
| N  | 1.967048  | 2.538546  | -0.178641 |
| C  | 2.515093  | 3.764119  | 0.399391  |
| C  | 1.253635  | 4.595037  | 0.673567  |
| H  | -1.485050 | 4.242612  | 1.381824  |
| H  | 3.336457  | 1.017903  | 0.325079  |
| H  | 3.081130  | 3.534509  | 1.316173  |
| H  | 1.124821  | 4.837114  | 1.740196  |

55

Figure 2\_para-H\_int2 / electronic energy: -2666.31784905 a.u. / lowest freq: 20.01 cm<sup>-1</sup>

|    |           |           |           |
|----|-----------|-----------|-----------|
| B  | -0.616210 | 0.966215  | -0.809586 |
| O  | -0.501986 | 2.366113  | -1.141561 |
| O  | -0.016136 | 0.828642  | 0.544573  |
| C  | 0.427641  | 2.977795  | -0.271688 |
| C  | 0.283304  | 2.127529  | 1.045410  |
| C  | 0.060167  | 4.447547  | -0.100472 |
| C  | 1.833234  | 2.886965  | -0.881660 |
| C  | -0.903076 | 2.576943  | 1.900474  |
| C  | 1.543574  | 2.061799  | 1.897670  |
| H  | -1.817766 | 2.655120  | 1.294813  |
| H  | -0.719622 | 3.545434  | 2.389655  |
| H  | -1.080803 | 1.827147  | 2.686309  |
| H  | 2.362992  | 1.562072  | 1.361752  |
| H  | 1.348562  | 1.493486  | 2.820028  |
| H  | 1.876983  | 3.070255  | 2.188176  |
| H  | 2.175854  | 1.844144  | -0.984498 |
| H  | 2.580631  | 3.433096  | -0.287098 |
| H  | 1.807274  | 3.325295  | -1.890485 |
| H  | 0.692915  | 4.929521  | 0.661133  |
| H  | -0.992517 | 4.567592  | 0.188017  |
| H  | 0.208921  | 4.981211  | -1.051681 |
| C  | -4.677288 | -1.406127 | 1.106219  |
| C  | -5.952852 | -1.969604 | 1.100169  |
| C  | -4.121314 | -0.843646 | -0.054676 |
| C  | -6.706200 | -1.984893 | -0.073139 |
| C  | -4.895612 | -0.868175 | -1.228372 |
| C  | -6.169042 | -1.430535 | -1.237493 |
| C  | -2.764868 | -0.257590 | 0.005784  |
| C  | -2.093487 | 0.368551  | -0.974093 |
| H  | -6.748695 | -1.437757 | -2.164202 |
| H  | -4.494320 | -0.442216 | -2.151083 |
| H  | -6.360814 | -2.400011 | 2.018307  |
| H  | -4.094264 | -1.398340 | 2.031826  |
| Cu | 1.325265  | -0.373186 | -0.665342 |
| H  | -2.579694 | 0.472982  | -1.955554 |
| H  | 0.126176  | 0.226215  | -1.681522 |
| H  | -2.269893 | -0.353100 | 0.981219  |
| H  | 2.616174  | -1.351521 | 3.050265  |
| H  | 4.929149  | -2.223687 | 2.052513  |
| C  | 2.145555  | -1.808014 | 2.164655  |
| H  | 1.290091  | -1.190494 | 1.860049  |
| H  | 5.903778  | -1.727112 | -0.076635 |
| N  | 3.083488  | -1.881753 | 1.073844  |
| C  | 4.341207  | -2.613083 | 1.207764  |
| H  | 1.782864  | -2.811330 | 2.443880  |
| C  | 2.887230  | -1.388509 | -0.153104 |
| C  | 5.009478  | -2.367712 | -0.151419 |
| H  | 4.999354  | -0.518096 | -2.311785 |
| H  | 4.142472  | -3.680944 | 1.395948  |
| N  | 3.958283  | -1.677937 | -0.897502 |
| C  | 4.175109  | -1.248875 | -2.254314 |
| H  | 5.301139  | -3.298660 | -0.660355 |
| H  | 3.256817  | -0.777617 | -2.628560 |
| H  | 4.425619  | -2.106067 | -2.899468 |
| H  | -7.704967 | -2.427707 | -0.082907 |

55

Figure 2\_para-H\_ts(C-Brot) / electronic energy: -2666.31236794 a.u. / lowest freq: -119.59 cm<sup>-1</sup>

|   |           |          |           |
|---|-----------|----------|-----------|
| B | -0.637241 | 0.603730 | -0.744076 |
| O | -0.826719 | 1.953951 | -1.207615 |
| O | 0.042819  | 0.744210 | 0.577076  |
| C | 0.089783  | 2.802785 | -0.548597 |
| C | 0.226287  | 2.126920 | 0.867087  |
| C | -0.482080 | 4.215747 | -0.508528 |
| C | 1.415444  | 2.832008 | -1.323855 |
| C | -0.886841 | 2.554059 | 1.826324  |
| C | 1.579145  | 2.328861 | 1.538737  |
| H | -1.872544 | 2.485959 | 1.345092  |
| H | -0.747765 | 3.582850 | 2.191242  |
| H | -0.886936 | 1.878248 | 2.694873  |
| H | 2.393668  | 1.891147 | 0.945580  |
| H | 1.584394  | 1.844208 | 2.527045  |
| H | 1.790567  | 3.399104 | 1.687960  |
| H | 1.917509  | 1.851156 | -1.337132 |

|    |           |           |           |
|----|-----------|-----------|-----------|
| H  | 2.121225  | 3.567457  | -0.909605 |
| H  | 1.205019  | 3.105277  | -2.368723 |
| H  | 0.144795  | 4.881955  | 0.104624  |
| H  | -1.503115 | 4.224057  | -0.105390 |
| H  | -0.522208 | 4.631002  | -1.527102 |
| C  | -5.463195 | -0.225970 | 0.610276  |
| C  | -6.688935 | -0.889149 | 0.647604  |
| C  | -4.345936 | -0.791267 | -0.026225 |
| C  | -6.825021 | -2.142220 | 0.051239  |
| C  | -4.499159 | -2.058798 | -0.615002 |
| C  | -5.721739 | -2.723885 | -0.577978 |
| C  | -3.076222 | -0.033284 | -0.056983 |
| C  | -1.969334 | -0.309686 | -0.763991 |
| H  | -5.815596 | -3.708147 | -1.043919 |
| H  | -3.647054 | -2.535885 | -1.104990 |
| H  | -7.543389 | -0.423139 | 1.144828  |
| H  | -5.365277 | 0.756957  | 1.080216  |
| Cu | 1.491422  | -0.425499 | -0.618847 |
| H  | -1.987685 | -1.207184 | -1.400057 |
| H  | 0.205237  | -0.042140 | -1.600555 |
| H  | -3.082067 | 0.867203  | 0.570722  |
| H  | 2.931542  | -0.847481 | 3.173817  |
| H  | 5.277057  | -1.685057 | 2.234971  |
| C  | 2.476663  | -1.404618 | 2.339598  |
| H  | 1.585240  | -0.863955 | 1.994073  |
| H  | 6.145441  | -1.236722 | 0.044134  |
| N  | 3.408721  | -1.524392 | 1.246974  |
| C  | 4.706704  | -2.170704 | 1.429735  |
| H  | 2.171948  | -2.397129 | 2.712463  |
| C  | 3.144676  | -1.233643 | -0.031476 |
| C  | 5.348493  | -1.999624 | 0.048954  |
| H  | 5.141627  | -0.487173 | -2.331416 |
| H  | 4.565662  | -3.230535 | 1.701392  |
| N  | 4.220080  | -1.544343 | -0.761978 |
| C  | 4.384973  | -1.272952 | -2.166150 |
| H  | 5.769129  | -2.933797 | -0.350808 |
| H  | 3.425363  | -0.933093 | -2.577555 |
| H  | 4.704231  | -2.180301 | -2.702825 |
| H  | -7.783703 | -2.665638 | 0.078714  |

55

Figure 2\_para\_H\_int3 / electronic energy: -2666.31707941 a.u. / lowest freq: 15.86 cm-1

|    |           |           |           |
|----|-----------|-----------|-----------|
| B  | -0.693147 | 0.354395  | -0.399671 |
| O  | -0.888411 | 1.620263  | -1.058380 |
| O  | 0.154575  | 0.655675  | 0.794885  |
| C  | 0.020707  | 2.571343  | -0.544813 |
| C  | 0.255486  | 2.069515  | 0.928125  |
| C  | -0.606507 | 3.957780  | -0.636517 |
| C  | 1.305778  | 2.552523  | -1.383740 |
| C  | -0.851451 | 2.527184  | 1.880837  |
| C  | 1.618744  | 2.422633  | 1.507866  |
| H  | -1.845111 | 2.313958  | 1.460959  |
| H  | -0.786346 | 3.602600  | 2.104829  |
| H  | -0.758827 | 1.973621  | 2.827238  |
| H  | 2.429583  | 1.941338  | 0.942996  |
| H  | 1.687445  | 2.079730  | 2.551736  |
| H  | 1.782179  | 3.511508  | 1.498492  |
| H  | 1.829995  | 1.584785  | -1.313369 |
| H  | 2.010908  | 3.341209  | -1.081856 |
| H  | 1.042681  | 2.708962  | -2.440486 |
| H  | 0.026625  | 4.715529  | -0.148909 |
| H  | -1.601407 | 3.978889  | -0.172776 |
| H  | -0.723716 | 4.242564  | -1.693277 |
| C  | -5.754429 | -0.082859 | -0.530671 |
| C  | -6.994109 | -0.686587 | -0.324003 |
| C  | -4.557497 | -0.738619 | -0.198278 |
| C  | -7.066538 | -1.968020 | 0.221073  |
| C  | -4.649688 | -2.031831 | 0.346233  |
| C  | -5.886115 | -2.637046 | 0.553740  |
| C  | -3.270276 | -0.049524 | -0.431956 |
| C  | -2.039215 | -0.461203 | -0.089545 |
| H  | -5.930618 | -3.643170 | 0.978564  |
| H  | -3.738863 | -2.576441 | 0.606540  |
| H  | -7.909405 | -0.152258 | -0.591078 |
| H  | -5.706076 | 0.921534  | -0.961076 |
| Cu | 1.482280  | -0.568936 | -0.406570 |
| H  | -1.936122 | -1.426179 | 0.429735  |
| H  | 0.003028  | -0.494937 | -1.196958 |
| H  | -3.357722 | 0.919151  | -0.941257 |
| H  | 3.735686  | -0.351079 | 2.999807  |
| H  | 5.892934  | -1.048696 | 1.642775  |
| C  | 3.176916  | -1.062203 | 2.370766  |
| H  | 2.175546  | -0.654039 | 2.179918  |
| H  | 6.248293  | -0.924392 | -0.721852 |
| N  | 3.853766  | -1.260894 | 1.114540  |
| C  | 5.239101  | -1.723800 | 1.070612  |
| H  | 3.078568  | -2.011410 | 2.923765  |
| C  | 3.295949  | -1.152294 | -0.095424 |
| C  | 5.537884  | -1.716953 | -0.433594 |
| H  | 4.660032  | -0.519064 | -2.850783 |
| H  | 5.318878  | -2.729685 | 1.515005  |
| N  | 4.223066  | -1.445873 | -1.012387 |
| C  | 4.049969  | -1.340043 | -2.437906 |
| H  | 5.935309  | -2.676138 | -0.797713 |
| H  | 2.991829  | -1.138078 | -2.650939 |
| H  | 4.344460  | -2.276371 | -2.937773 |
| H  | -8.035533 | -2.446397 | 0.382694  |

36

Figure 2\_para-H-alkenylBpin / electronic energy: -719.616306926 a.u. / lowest freq: 11.87 cm-1

|   |           |           |           |
|---|-----------|-----------|-----------|
| B | 0.922364  | -0.365147 | -0.028404 |
| O | 1.894117  | -1.316245 | -0.173823 |
| O | 1.433940  | 0.892512  | 0.148584  |
| C | 3.161660  | -0.695762 | 0.122071  |
| C | 2.848301  | 0.828137  | -0.120020 |
| C | 4.227554  | -1.277336 | -0.792080 |
| C | 3.487647  | -1.014695 | 1.579963  |
| C | 3.048728  | 1.254565  | -1.573413 |
| C | 3.579766  | 1.781941  | 0.809984  |
| H | 2.542480  | 0.568799  | -2.269063 |
| H | 4.114997  | 1.296474  | -1.838243 |
| H | 2.618726  | 2.256986  | -1.714756 |
| H | 3.324723  | 1.603424  | 1.862628  |
| H | 3.311513  | 2.820863  | 0.566919  |
| H | 4.668438  | 1.676163  | 0.689783  |
| H | 2.735025  | -0.594781 | 2.263998  |
| H | 4.475038  | -0.625732 | 1.866988  |
| H | 3.496130  | -2.106186 | 1.715677  |
| H | 5.185806  | -0.755417 | -0.649802 |
| H | 3.942879  | -1.205244 | -1.849722 |
| H | 4.382907  | -2.340283 | -0.555288 |
| C | -3.806743 | 1.248461  | 0.192092  |
| C | -5.197110 | 1.149758  | 0.183811  |
| C | -2.998838 | 0.113525  | 0.018524  |
| C | -5.806490 | -0.090352 | -0.001273 |
| C | -3.628094 | -1.129019 | -0.169041 |
| C | -5.016012 | -1.228789 | -0.178362 |
| C | -1.532965 | 0.275159  | 0.038943  |
| C | -0.597425 | -0.686080 | -0.066780 |
| H | -5.487864 | -2.203239 | -0.325431 |
| H | -3.028632 | -2.030869 | -0.311211 |
| H | -6.895940 | -0.172912 | -0.008967 |
| H | -5.805802 | 2.046357  | 0.322501  |
| H | -3.332001 | 2.222916  | 0.336640  |
| H | -0.908917 | -1.730947 | -0.184153 |
| H | -1.195659 | 1.312156  | 0.158923  |

55

Figure 2\_para-H\_pc2\_rev / electronic energy: -2666.32621361 a.u. / lowest freq: 23.57 cm-1

|    |           |           |           |
|----|-----------|-----------|-----------|
| B  | 0.642761  | -1.195883 | 0.437475  |
| O  | 1.569312  | -1.077275 | 1.441695  |
| O  | 1.158006  | -1.796684 | -0.683378 |
| C  | 2.851761  | -1.456016 | 0.911437  |
| C  | 2.453845  | -2.322277 | -0.344107 |
| C  | 3.627558  | -2.208618 | 1.981002  |
| C  | 3.583084  | -0.167743 | 0.540291  |
| C  | 2.262370  | -3.801644 | -0.013464 |
| C  | 3.380935  | -2.168950 | -1.539284 |
| H  | 1.597009  | -3.937875 | 0.852009  |
| H  | 3.220166  | -4.297682 | 0.199510  |
| H  | 1.800456  | -4.303319 | -0.876498 |
| H  | 3.402895  | -1.133853 | -1.904577 |
| H  | 3.035597  | -2.810942 | -2.363045 |
| H  | 4.406010  | -2.472764 | -1.278561 |
| H  | 3.036359  | 0.382883  | -0.236702 |
| H  | 4.603692  | -0.366690 | 0.183390  |
| H  | 3.648127  | 0.474966  | 1.430875  |
| H  | 4.574792  | -2.594698 | 1.574986  |
| H  | 3.050983  | -3.050589 | 2.385399  |
| H  | 3.866565  | -1.530234 | 2.813512  |
| C  | -4.211397 | -1.372005 | -0.961238 |
| C  | -5.583118 | -1.246493 | -0.754342 |
| C  | -3.287821 | -0.836832 | -0.050102 |
| C  | -6.064322 | -0.580897 | 0.373530  |
| C  | -3.786469 | -0.173916 | 1.082809  |
| C  | -5.157832 | -0.046412 | 1.290596  |
| C  | -1.837260 | -0.995157 | -0.314779 |
| C  | -0.818959 | -0.719536 | 0.597407  |
| H  | -5.523013 | 0.475652  | 2.178541  |
| H  | -3.096107 | 0.253818  | 1.813552  |
| H  | -7.139462 | -0.477418 | 0.537615  |
| H  | -6.281857 | -1.668883 | -1.480779 |
| H  | -3.840940 | -1.887193 | -1.851584 |
| Cu | -0.957012 | 0.811512  | -0.786262 |
| H  | -1.087843 | -0.297385 | 1.573042  |
| H  | -1.814421 | 1.233796  | -2.074586 |
| H  | -1.600681 | -1.623627 | -1.181214 |
| H  | 3.536903  | 2.876723  | -0.426168 |
| H  | 2.816639  | 1.237832  | -2.428021 |
| H  | 2.486358  | 3.121841  | 1.709641  |
| C  | 2.509796  | 3.267740  | -0.490909 |
| C  | 1.828346  | 1.722036  | -2.367613 |
| H  | 0.134700  | 2.265001  | 2.764231  |
| N  | 1.607956  | 2.264103  | -1.052359 |
| C  | 1.883419  | 3.533483  | 0.882885  |
| H  | 1.052501  | 0.976521  | -2.583335 |
| C  | 0.513631  | 2.064927  | -0.309957 |
| N  | 0.612257  | 2.818189  | 0.787623  |
| H  | 2.525133  | 4.165578  | -1.131349 |
| H  | 1.784334  | 2.512533  | -3.135706 |
| C  | -0.304698 | 2.785987  | 1.896354  |
| H  | 1.719180  | 4.603053  | 1.080799  |
| H  | -1.217444 | 2.259515  | 1.589420  |
| H  | -0.574348 | 3.808581  | 2.203347  |

55

Figure 2\_para-H\_ts(CuHadd\_rev) / electronic energy: -2666.30378750 a.u. / lowest freq: -811.40 cm-1

|   |           |          |          |
|---|-----------|----------|----------|
| B | -0.454039 | 1.448428 | 0.489228 |
|---|-----------|----------|----------|



|    |           |           |           |
|----|-----------|-----------|-----------|
| O  | -1.320692 | 1.641379  | 1.556053  |
| O  | -1.058301 | 1.813053  | -0.712698 |
| C  | -2.626461 | 1.869715  | 1.015613  |
| C  | -2.296745 | 2.461225  | -0.401635 |
| C  | -3.398424 | 2.806018  | 1.931656  |
| C  | -3.332028 | 0.514710  | 0.935416  |
| C  | -2.031178 | 3.966835  | -0.365866 |
| C  | -3.321881 | 2.142743  | -1.478632 |
| H  | -1.316741 | 4.228340  | 0.429018  |
| H  | -2.955607 | 4.541901  | -0.209532 |
| H  | -1.593612 | 4.274311  | -1.327278 |
| H  | -3.436651 | 1.061384  | -1.624916 |
| H  | -3.004955 | 2.581926  | -2.436552 |
| H  | -4.303605 | 2.567840  | -1.219499 |
| H  | -2.793875 | -0.173159 | 0.266959  |
| H  | -4.369431 | 0.610768  | 0.582722  |
| H  | -3.350799 | 0.060761  | 1.937406  |
| H  | -4.374756 | 3.061652  | 1.492331  |
| H  | -2.846495 | 3.735628  | 2.123626  |
| H  | -3.580216 | 2.315819  | 2.899927  |
| C  | 4.160811  | 1.725110  | -0.705727 |
| C  | 5.528002  | 1.685425  | -0.426435 |
| C  | 3.315423  | 0.692105  | -0.286689 |
| C  | 6.069910  | 0.611508  | 0.278435  |
| C  | 3.871639  | -0.385340 | 0.415198  |
| C  | 5.234682  | -0.426146 | 0.698617  |
| C  | 1.841710  | 0.779833  | -0.542726 |
| C  | 0.959040  | 0.911279  | 0.599884  |
| H  | 5.651023  | -1.277853 | 1.242306  |
| H  | 3.221913  | -1.208967 | 0.725954  |
| H  | 7.140380  | 0.578282  | 0.494970  |
| H  | 6.173613  | 2.500581  | -0.762973 |
| H  | 3.741600  | 2.573413  | -1.253580 |
| Cu | 0.608858  | -0.837424 | -0.449322 |
| H  | 1.363667  | 0.633658  | 1.580875  |
| H  | 1.770605  | -0.593647 | -1.507677 |
| H  | 1.594921  | 1.418608  | -1.398528 |
| H  | -3.614501 | -3.377487 | -0.479004 |
| H  | -3.229433 | -1.343230 | -2.099186 |
| H  | -2.412657 | -3.926710 | 1.523644  |
| C  | -2.549733 | -3.591984 | -0.651107 |
| C  | -2.149236 | -1.554797 | -2.095122 |
| H  | -0.084754 | -3.351936 | 2.647517  |
| N  | -1.811142 | -2.369614 | -0.956630 |
| C  | -1.828990 | -4.097265 | 0.602677  |
| H  | -1.604677 | -0.602920 | -2.029397 |
| C  | -0.673677 | -2.261239 | -0.256966 |
| N  | -0.625149 | -3.269218 | 0.619388  |
| H  | -2.475185 | -4.302607 | -1.492284 |
| H  | -1.891234 | -2.055352 | -3.044698 |
| C  | 0.371110  | -3.425952 | 1.646043  |
| H  | -1.576137 | -5.166371 | 0.551943  |
| H  | 1.116951  | -2.626223 | 1.545178  |
| H  | 0.876103  | -4.401571 | 1.562960  |

55

Figure 2\_para-H\_L-Cu-alkyl\_rev / electronic energy: -2666.35607480 a.u. / lowest freq: 17.86 cm<sup>-1</sup>

|    |           |           |           |
|----|-----------|-----------|-----------|
| B  | -1.701785 | 1.209692  | 0.324652  |
| O  | -2.617071 | 0.932512  | 1.344129  |
| O  | -2.240887 | 0.828773  | -0.911840 |
| C  | -3.623233 | 0.072237  | 0.813487  |
| C  | -3.600735 | 0.441988  | -0.714456 |
| C  | -4.946155 | 0.347447  | 1.513325  |
| C  | -3.183819 | -1.370202 | 1.079064  |
| C  | -4.478876 | 1.650785  | -1.042997 |
| C  | -3.936893 | -0.711334 | -1.649219 |
| H  | -4.272922 | 2.488799  | -0.360386 |
| H  | -5.550996 | 1.410478  | -0.987750 |
| H  | -4.254906 | 1.985859  | -2.066731 |
| H  | -3.223832 | -1.539008 | -1.540181 |
| H  | -3.897730 | -0.368892 | -2.694495 |
| H  | -4.950919 | -1.093966 | -1.455898 |
| H  | -2.224925 | -1.585330 | 0.584371  |
| H  | -3.930012 | -2.103472 | 0.739337  |
| H  | -3.036217 | -1.505063 | 2.161147  |
| H  | -5.762577 | -0.231478 | 1.054760  |
| H  | -5.208499 | 1.413213  | 1.475860  |
| H  | -4.876766 | 0.055832  | 2.572283  |
| C  | 2.657058  | 3.187932  | 0.400993  |
| C  | 4.034220  | 2.990164  | 0.509911  |
| C  | 1.891390  | 2.463732  | -0.521991 |
| C  | 4.677720  | 2.063084  | -0.311003 |
| C  | 2.555658  | 1.548884  | -1.351297 |
| C  | 3.931461  | 1.345502  | -1.247571 |
| C  | 0.383734  | 2.595588  | -0.550454 |
| C  | -0.307062 | 1.762280  | 0.537125  |
| H  | 4.425148  | 0.624061  | -1.904172 |
| H  | 1.978164  | 0.978506  | -2.085229 |
| H  | 5.755647  | 1.905228  | -0.225588 |
| H  | 4.609718  | 3.565355  | 1.240067  |
| H  | 2.161033  | 3.912317  | 1.054155  |
| Cu | 0.457449  | -0.082326 | 0.468814  |
| H  | -0.137361 | 2.172177  | 1.548046  |
| H  | 0.020502  | 2.282855  | -1.543092 |
| H  | 0.128573  | 3.669091  | -0.455875 |
| H  | 1.005029  | -4.841416 | -0.279989 |
| H  | -1.179641 | -3.407191 | -1.120428 |
| H  | 2.904314  | -4.317099 | 1.070916  |

|   |           |           |           |
|---|-----------|-----------|-----------|
| C | 1.584329  | -3.988578 | -0.669701 |
| C | -0.428546 | -2.663701 | -1.435831 |
| H | 3.370286  | -2.050113 | 2.569048  |
| N | 0.773069  | -2.772725 | -0.649411 |
| C | 2.764427  | -3.611977 | 0.237465  |
| H | -0.847268 | -1.655593 | -1.309362 |
| C | 1.241485  | -1.838176 | 0.182922  |
| N | 2.371345  | -2.293783 | 0.731185  |
| H | 1.893080  | -4.231209 | -1.698141 |
| H | -0.210507 | -2.825801 | -2.503933 |
| C | 3.232157  | -1.537336 | 1.603402  |
| H | 3.718299  | -3.542180 | -0.310964 |
| H | 2.778034  | -0.553057 | 1.780975  |
| H | 4.222993  | -1.388555 | 1.142604  |

76

Figure 2\_para-H\_pc3\_01 / electronic energy: -3505.18603597 a.u. / lowest freq: 2.52 cm<sup>-1</sup>

|    |           |           |           |
|----|-----------|-----------|-----------|
| C  | 0.398919  | -0.869750 | -1.435602 |
| C  | 0.427338  | -1.915417 | -0.518220 |
| C  | 1.412939  | -1.989963 | 0.606397  |
| O  | 2.635277  | -2.639188 | 0.175574  |
| P  | 4.004762  | -1.819701 | 0.207482  |
| O  | 4.352269  | -1.119615 | 1.460704  |
| O  | 4.978808  | -2.997115 | -0.270725 |
| O  | 3.940457  | -0.776713 | -1.014930 |
| C  | 6.388074  | -2.806178 | -0.193263 |
| H  | -0.071830 | -1.006336 | -2.414707 |
| H  | 1.082308  | -0.018073 | -1.347367 |
| H  | -0.045149 | -2.867927 | -0.786383 |
| H  | 1.647716  | -0.991506 | 1.002897  |
| H  | 1.024800  | -2.596704 | 1.435661  |
| B  | -0.173720 | 2.629400  | -0.985819 |
| O  | 1.170430  | 2.456431  | -1.208592 |
| O  | -0.410509 | 3.414070  | 0.116280  |
| C  | 1.880022  | 2.955514  | -0.058386 |
| C  | 0.843118  | 3.965866  | 0.554432  |
| C  | 3.190902  | 3.576464  | -0.511675 |
| C  | 2.156223  | 1.759391  | 0.848604  |
| C  | 0.953947  | 5.368474  | -0.040998 |
| C  | 0.851356  | 4.041160  | 2.072893  |
| H  | 0.965543  | 5.339114  | -1.140832 |
| H  | 1.861470  | 5.884207  | 0.304241  |
| H  | 0.081630  | 5.961371  | 0.271478  |
| H  | 0.627701  | 3.069333  | 2.531378  |
| H  | 0.092371  | 4.760782  | 2.414152  |
| H  | 1.831450  | 4.382042  | 2.439562  |
| H  | 1.218592  | 1.284898  | 1.178478  |
| H  | 2.734005  | 2.044054  | 1.739363  |
| H  | 2.743711  | 1.016438  | 0.292222  |
| H  | 3.711091  | 4.044977  | 0.337478  |
| H  | 3.037017  | 4.335041  | -1.290473 |
| H  | 3.848157  | 2.795277  | -0.921291 |
| C  | -4.367731 | -0.044260 | -0.677558 |
| C  | -5.423275 | -0.799083 | -1.175591 |
| C  | -3.250543 | 0.306700  | -1.476397 |
| C  | -5.421569 | -1.239111 | -2.504127 |
| C  | -3.286137 | -0.127827 | -2.820963 |
| C  | -4.344240 | -0.888637 | -3.318828 |
| C  | -2.107487 | 1.035451  | -0.894760 |
| C  | -1.316666 | 1.965712  | -1.824860 |
| H  | -4.327244 | -1.207834 | -4.365255 |
| H  | -2.461109 | 0.132430  | -3.489262 |
| H  | -6.250343 | -1.832542 | -2.897412 |
| H  | -6.264473 | -1.045657 | -0.520615 |
| H  | -4.389089 | 0.292084  | 0.364168  |
| Cu | -1.071286 | -0.553223 | -0.107631 |
| H  | -1.965550 | 2.746005  | -2.277456 |
| H  | -0.860638 | 1.419382  | -2.666582 |
| H  | -2.451651 | 1.600828  | -0.013111 |
| H  | 6.857584  | -3.728916 | -0.555502 |
| H  | 6.702770  | -2.619151 | 0.844151  |
| H  | 6.713624  | -1.965892 | -0.826826 |
| C  | 3.697841  | -1.198255 | -2.351868 |
| H  | 3.360541  | -0.317755 | -2.912948 |
| H  | 2.917278  | -1.972085 | -2.393647 |
| H  | 4.621561  | -1.586013 | -2.808175 |
| H  | -3.009081 | -4.107084 | 1.210184  |
| H  | -3.769781 | -2.852056 | 3.471308  |
| C  | -3.102421 | -3.116502 | 0.737297  |
| H  | -2.349449 | -3.028336 | -0.055873 |
| H  | -4.102757 | -3.037927 | 0.279305  |
| C  | -3.771119 | -1.936121 | 2.862418  |
| N  | -2.889916 | -2.071210 | 1.704121  |
| H  | -4.806096 | -1.751577 | 2.525561  |
| H  | -2.603543 | -1.018518 | 4.490593  |
| C  | -2.080365 | -1.019938 | 1.539279  |
| C  | -3.166697 | -0.729478 | 3.586531  |
| N  | -2.257845 | -0.192802 | 2.575645  |
| H  | -3.917302 | 0.019392  | 3.877931  |
| H  | -0.725675 | 0.842768  | 3.597437  |
| C  | -1.493309 | 1.002910  | 2.820302  |
| H  | -1.004235 | 1.317916  | 1.889170  |
| H  | -2.155751 | 1.817935  | 3.149958  |

76

Figure 2\_para-H\_pc3\_02 / electronic energy: -3505.18914182 a.u. / lowest freq: 17.50 cm<sup>-1</sup>

|   |          |           |           |
|---|----------|-----------|-----------|
| C | 0.404263 | -1.108386 | -1.691834 |
| C | 0.469245 | -2.025215 | -0.647427 |
| C | 1.384751 | -1.842439 | 0.525357  |

|    |           |           |           |
|----|-----------|-----------|-----------|
| O  | 2.648677  | -2.521222 | 0.318008  |
| P  | 3.968817  | -1.660759 | 0.080444  |
| O  | 4.235513  | -0.552351 | 1.022367  |
| O  | 5.020454  | -2.867009 | 0.058163  |
| O  | 3.898746  | -1.108516 | -1.425441 |
| C  | 6.412812  | -2.575030 | -0.012987 |
| H  | -0.012424 | -1.399395 | -2.661296 |
| H  | 1.014265  | -0.199745 | -1.674524 |
| H  | 0.085644  | -3.041704 | -0.795653 |
| H  | 1.568273  | -0.772886 | 0.714251  |
| H  | 0.962749  | -2.284859 | 1.437467  |
| B  | -0.402449 | 2.625523  | -0.064022 |
| O  | -0.108437 | 3.934558  | 0.219356  |
| O  | 0.734464  | 1.861759  | -0.179833 |
| C  | 1.307666  | 4.125209  | 0.053010  |
| C  | 1.868783  | 2.662742  | 0.209735  |
| C  | 1.805232  | 5.112201  | 1.096795  |
| C  | 1.515798  | 4.698831  | -1.348461 |
| C  | 2.211677  | 2.298521  | 1.652597  |
| C  | 3.046453  | 2.335710  | -0.694483 |
| H  | 1.374946  | 2.509237  | 2.335139  |
| H  | 3.093381  | 2.854563  | 2.002745  |
| H  | 2.458480  | 1.227945  | 1.704505  |
| H  | 2.774393  | 2.398160  | -1.756483 |
| H  | 3.409329  | 1.320258  | -0.485891 |
| H  | 3.877186  | 3.033199  | -0.505922 |
| H  | 1.166046  | 4.000816  | -2.123615 |
| H  | 2.573278  | 4.930899  | -1.539409 |
| H  | 0.936677  | 5.628946  | -1.444770 |
| H  | 2.899261  | 5.217118  | 1.041734  |
| H  | 1.533487  | 4.802845  | 2.114622  |
| H  | 1.359962  | 6.101715  | 0.914641  |
| C  | -3.773638 | -0.311544 | -2.526304 |
| C  | -5.049027 | -0.828421 | -2.719036 |
| C  | -3.430252 | 0.442366  | -1.375776 |
| C  | -6.057500 | -0.615847 | -1.771380 |
| C  | -4.471981 | 0.657178  | -0.443231 |
| C  | -5.751661 | 0.135543  | -0.636522 |
| C  | -2.050050 | 0.912389  | -1.167947 |
| C  | -1.868858 | 2.086037  | -0.204170 |
| H  | -6.524439 | 0.324890  | 0.114851  |
| H  | -4.273798 | 1.240219  | 0.459165  |
| H  | -7.060681 | -1.021695 | -1.922051 |
| H  | -5.264847 | -1.402970 | -3.624830 |
| H  | -3.000995 | -0.494748 | -3.280723 |
| Cu | -1.106014 | -0.730249 | -0.406265 |
| H  | -2.172098 | 1.801019  | 0.823541  |
| H  | -2.527245 | 2.945792  | -0.452188 |
| H  | -1.582959 | 1.131980  | -2.142195 |
| H  | 6.939722  | -3.536031 | -0.057468 |
| H  | 6.743237  | -2.018496 | 0.876765  |
| H  | 6.654784  | -1.992232 | -0.915886 |
| C  | 3.680103  | -1.977443 | -2.530175 |
| H  | 3.309103  | -1.363195 | -3.360195 |
| H  | 2.931984  | -2.747959 | -2.293053 |
| H  | 4.620617  | -2.463671 | -2.832116 |
| H  | -3.771535 | -3.795477 | 0.728993  |
| H  | -3.855180 | -2.820025 | 3.241909  |
| C  | -3.690283 | -2.738247 | 0.428675  |
| H  | -3.082068 | -2.674444 | -0.482707 |
| H  | -4.700283 | -2.359421 | 0.201171  |
| C  | -3.691505 | -1.833616 | 2.783352  |
| N  | -3.067377 | -1.961656 | 1.468183  |
| H  | -4.670863 | -1.334936 | 2.684745  |
| H  | -2.103161 | -1.561845 | 4.289642  |
| C  | -2.012145 | -1.158546 | 1.308021  |
| C  | -2.670746 | -0.979517 | 3.543651  |
| N  | -1.783341 | -0.536206 | 2.470676  |
| H  | -3.126154 | -0.120061 | 4.057167  |
| H  | 0.062958  | -0.162189 | 3.421687  |
| C  | -0.657179 | 0.319972  | 2.738167  |
| H  | -0.150460 | 0.547459  | 1.791807  |
| H  | -0.988229 | 1.264516  | 3.198824  |

76

Figure 2 para-H\_ts(AS)\_01 / electronic energy: -3505.15917847 a.u. / lowest freq: -332.84 cm<sup>-1</sup>

|   |           |           |           |
|---|-----------|-----------|-----------|
| C | 0.248569  | -0.952868 | -1.799470 |
| C | 0.238832  | -2.166785 | -1.069742 |
| C | 0.749358  | -2.263899 | 0.232695  |
| O | 2.643501  | -3.087606 | 0.152322  |
| P | 3.683447  | -1.970105 | 0.129237  |
| O | 3.662626  | -0.877692 | 1.149019  |
| O | 5.113240  | -2.756181 | 0.093654  |
| O | 3.643984  | -1.244741 | -1.341069 |
| C | 6.301081  | -1.994604 | 0.130398  |
| H | -0.105273 | -0.950619 | -2.833617 |
| H | 0.955416  | -0.162429 | -1.526398 |
| H | -0.240721 | -3.051779 | -1.500092 |
| H | 1.148404  | -1.381970 | 0.739168  |
| H | 0.472829  | -3.105648 | 0.864659  |
| B | -0.217084 | 2.606099  | -0.067916 |
| O | 0.120188  | 3.906010  | 0.195942  |
| O | 0.885096  | 1.801812  | -0.187917 |
| C | 1.545295  | 4.041499  | 0.020751  |
| C | 2.052604  | 2.561439  | 0.195270  |
| C | 2.080690  | 5.023454  | 1.049867  |
| C | 1.767791  | 4.587944  | -1.388696 |
| C | 2.379286  | 2.197631  | 1.641320  |

|    |           |           |           |
|----|-----------|-----------|-----------|
| C  | 3.212490  | 2.162947  | -0.702010 |
| H  | 1.551156  | 2.449507  | 2.320904  |
| H  | 3.278690  | 2.729467  | 1.985005  |
| H  | 2.588326  | 1.118378  | 1.693985  |
| H  | 2.959371  | 2.259159  | -1.766394 |
| H  | 3.479084  | 1.115412  | -0.502014 |
| H  | 4.091689  | 2.792482  | -0.494391 |
| H  | 1.393131  | 3.891617  | -2.153792 |
| H  | 2.832764  | 4.778861  | -1.583709 |
| H  | 1.222216  | 5.536765  | -1.497771 |
| H  | 3.177577  | 5.087218  | 0.990142  |
| H  | 1.802059  | 4.736972  | 2.072449  |
| H  | 1.671117  | 6.026036  | 0.855906  |
| C  | -3.710375 | -0.237535 | -2.476568 |
| C  | -5.016953 | -0.666389 | -2.686527 |
| C  | -3.351299 | 0.524122  | -1.343853 |
| C  | -6.022999 | -0.346564 | -1.770026 |
| C  | -4.380757 | 0.837475  | -0.435500 |
| C  | -5.692344 | 0.410355  | -0.646355 |
| C  | -1.935733 | 0.932293  | -1.133899 |
| C  | -1.702650 | 2.108817  | -0.188549 |
| H  | -6.466090 | 0.676902  | 0.078941  |
| H  | -4.154718 | 1.428619  | 0.454549  |
| H  | -7.050732 | -0.678555 | -1.934678 |
| H  | -5.256386 | -1.251998 | -3.578404 |
| H  | -2.935768 | -0.497590 | -3.204910 |
| Cu | -1.113539 | -0.739997 | -0.374205 |
| H  | -2.028272 | 1.865442  | 0.841029  |
| H  | -2.328110 | 2.976512  | -0.479642 |
| H  | -1.469663 | 1.130543  | -2.109550 |
| H  | 7.148224  | -2.693260 | 0.080434  |
| H  | 6.374850  | -1.407887 | 1.060594  |
| H  | 6.366866  | -1.299941 | -0.724913 |
| C  | 3.597444  | -2.027646 | -2.510678 |
| H  | 3.357145  | -1.363822 | -3.353769 |
| H  | 2.825979  | -2.811617 | -2.443369 |
| H  | 4.568961  | -2.512441 | -2.710477 |
| H  | -3.991142 | -3.543598 | 0.897318  |
| H  | -3.930397 | -2.513112 | 3.360412  |
| C  | -3.842476 | -2.508441 | 0.551497  |
| H  | -3.250355 | -2.525979 | -0.372747 |
| H  | -4.826128 | -2.064253 | 0.330304  |
| C  | -3.699543 | -1.548372 | 2.886325  |
| N  | -3.140575 | -1.742881 | 1.549188  |
| H  | -4.634223 | -0.966331 | 2.817930  |
| H  | -2.021939 | -1.411610 | 4.311655  |
| C  | -2.035449 | -1.027876 | 1.346520  |
| C  | -2.578425 | -0.781526 | 3.597276  |
| N  | -1.709245 | -0.407065 | 2.482537  |
| H  | -2.937794 | 0.108834  | 4.132590  |
| H  | 0.215502  | -0.264631 | 3.329019  |
| C  | -0.479497 | 0.313014  | 2.696033  |
| H  | -0.001771 | 0.498371  | 1.725636  |
| H  | -0.675521 | 1.278835  | 3.186828  |

76

Figure 2\_para-H\_ts(AS)\_02 / electronic energy: -3505.15468151 a.u. / lowest freq: -321.33 cm-1

|   |           |           |           |
|---|-----------|-----------|-----------|
| C | 0.594816  | -1.219165 | -0.406893 |
| C | 0.859196  | -1.213394 | 0.990365  |
| C | 1.803066  | -0.349035 | 1.555577  |
| O | 3.633424  | -1.313710 | 1.654517  |
| P | 4.238531  | -1.325702 | 0.251221  |
| O | 3.906680  | -0.246118 | -0.729971 |
| O | 5.847678  | -1.450765 | 0.510277  |
| O | 3.891971  | -2.756788 | -0.466539 |
| C | 6.705470  | -1.495129 | -0.608689 |
| H | -0.103788 | -1.949432 | -0.823517 |
| H | 1.377704  | -0.859293 | -1.084079 |
| H | 0.299685  | -1.877905 | 1.655677  |
| H | 2.292852  | 0.402525  | 0.936084  |
| H | 1.833987  | -0.203869 | 2.634765  |
| B | -3.074655 | -0.717268 | -0.847413 |
| O | -3.913805 | -1.023841 | 0.192319  |
| O | -2.628514 | -1.836578 | -1.497412 |
| C | -3.860602 | -2.449461 | 0.400677  |
| C | -3.363259 | -2.970231 | -0.998152 |
| C | -5.234891 | -2.945394 | 0.818027  |
| C | -2.848083 | -2.691816 | 1.517882  |
| C | -4.502827 | -3.231449 | -1.981053 |
| C | -2.437245 | -4.174150 | -0.937225 |
| H | -5.194696 | -2.377533 | -2.032898 |
| H | -5.075808 | -4.129707 | -1.709194 |
| H | -4.078652 | -3.385341 | -2.984084 |
| H | -1.525476 | -3.961530 | -0.363632 |
| H | -2.136908 | -4.462637 | -1.955316 |
| H | -2.947373 | -5.033780 | -0.477052 |
| H | -1.851311 | -2.323191 | 1.234440  |
| H | -2.765744 | -3.758603 | 1.769498  |
| H | -3.166973 | -2.150529 | 2.420766  |
| H | -5.241014 | -4.042116 | 0.906553  |
| H | -6.010490 | -2.646194 | 0.101438  |
| H | -5.498697 | -2.523767 | 1.799183  |
| C | 0.672187  | 2.163047  | -2.584396 |
| C | 1.256919  | 3.368424  | -2.958501 |
| C | -0.564971 | 2.118370  | -1.908093 |
| C | 0.621713  | 4.580621  | -2.675127 |
| C | -1.191643 | 3.349564  | -1.639031 |
| C | -0.607253 | 4.559209  | -2.015421 |

|    |           |           |           |
|----|-----------|-----------|-----------|
| C  | -1.131487 | 0.811153  | -1.484850 |
| C  | -2.637233 | 0.738926  | -1.234878 |
| H  | -1.122992 | 5.497667  | -1.793204 |
| H  | -2.155045 | 3.364106  | -1.124300 |
| H  | 1.078605  | 5.528510  | -2.969055 |
| H  | 2.218920  | 3.362611  | -3.477655 |
| H  | 1.187030  | 1.223563  | -2.807507 |
| Cu | -0.229163 | 0.431324  | 0.280241  |
| H  | -3.195491 | 1.039884  | -2.147132 |
| H  | -2.962242 | 1.434138  | -0.443812 |
| H  | -0.835044 | 0.038844  | -2.206066 |
| H  | 7.739510  | -1.403912 | -0.246372 |
| H  | 6.496542  | -0.668657 | -1.307533 |
| H  | 6.607000  | -2.448616 | -1.156127 |
| C  | 3.954658  | -3.941868 | 0.291827  |
| H  | 3.753537  | -4.786151 | -0.383534 |
| H  | 3.204822  | -3.944902 | 1.099757  |
| H  | 4.950546  | -4.087228 | 0.745780  |
| H  | -2.629682 | 0.840317  | 3.511686  |
| H  | -1.538408 | 3.281784  | 3.993813  |
| C  | -2.716143 | 1.216617  | 2.477794  |
| H  | -2.630415 | 0.373675  | 1.783000  |
| H  | -3.715827 | 1.660050  | 2.351948  |
| C  | -1.655931 | 3.463773  | 2.912413  |
| N  | -1.695539 | 2.191280  | 2.192303  |
| H  | -2.589099 | 4.025388  | 2.760398  |
| H  | 0.279371  | 4.521073  | 3.046048  |
| C  | -0.611237 | 1.989052  | 1.439584  |
| C  | -0.433078 | 4.150219  | 2.294608  |
| N  | 0.158731  | 3.074652  | 1.501909  |
| H  | -0.705121 | 4.991591  | 1.635519  |
| H  | 2.248231  | 3.321013  | 1.513718  |
| C  | 1.404600  | 3.270990  | 0.806146  |
| H  | 1.570759  | 2.442605  | 0.107097  |
| H  | 1.375990  | 4.206643  | 0.226126  |

76

Figure 2 para-H\_pi-allyl\_01 / electronic energy: -3505.17787296 a.u. / lowest freq: 22.64 cm<sup>-1</sup>

|    |           |           |           |
|----|-----------|-----------|-----------|
| C  | -0.292336 | -1.996265 | -0.516347 |
| C  | -0.657294 | -2.172478 | 0.840957  |
| C  | 0.151939  | -1.681744 | 1.859566  |
| O  | 3.278334  | -1.795095 | 1.605959  |
| P  | 3.723960  | -1.757308 | 0.172128  |
| O  | 2.755212  | -1.595906 | -0.968927 |
| O  | 4.872921  | -0.576496 | 0.088411  |
| O  | 4.619275  | -3.091944 | -0.181980 |
| C  | 5.418173  | -0.255091 | -1.165702 |
| H  | -1.026065 | -2.234136 | -1.288295 |
| H  | 0.778214  | -1.969753 | -0.790081 |
| H  | -1.699353 | -2.425319 | 1.068105  |
| H  | 1.247473  | -1.603836 | 1.735664  |
| H  | -0.241374 | -1.627995 | 2.878946  |
| B  | -3.225774 | 0.273853  | -0.842142 |
| O  | -4.276797 | 0.558037  | -0.012068 |
| O  | -3.289122 | -0.995737 | -1.345927 |
| C  | -5.009617 | -0.660878 | 0.222479  |
| C  | -4.569864 | -1.557377 | -0.997750 |
| C  | -6.496647 | -0.348648 | 0.275548  |
| C  | -4.543266 | -1.204590 | 1.571516  |
| C  | -5.472644 | -1.394950 | -2.218622 |
| C  | -4.390171 | -3.031301 | -0.672892 |
| H  | -5.622617 | -0.334925 | -2.471767 |
| H  | -6.456431 | -1.858658 | -2.058252 |
| H  | -4.998606 | -1.885137 | -3.081526 |
| H  | -3.624485 | -3.191712 | 0.097257  |
| H  | -4.078520 | -3.575163 | -1.576685 |
| H  | -5.336111 | -3.469932 | -0.321668 |
| H  | -3.468378 | -1.435685 | 1.562773  |
| H  | -5.090542 | -2.115045 | 1.853816  |
| H  | -4.718752 | -0.444452 | 2.347013  |
| H  | -7.080877 | -1.275638 | 0.375150  |
| H  | -6.835144 | 0.184727  | -0.622028 |
| H  | -6.713154 | 0.284793  | 1.148446  |
| C  | 1.534224  | 1.143907  | -2.425841 |
| C  | 2.571416  | 1.995179  | -2.795951 |
| C  | 0.397058  | 1.629000  | -1.754374 |
| C  | 2.513968  | 3.356735  | -2.490347 |
| C  | 0.356904  | 3.000542  | -1.450705 |
| C  | 1.401549  | 3.852187  | -1.810301 |
| C  | -0.707749 | 0.693173  | -1.394342 |
| C  | -2.089003 | 1.304916  | -1.180431 |
| H  | 1.338652  | 4.915824  | -1.565110 |
| H  | -0.505860 | 3.415869  | -0.925640 |
| H  | 3.328213  | 4.024878  | -2.780946 |
| H  | 3.438835  | 1.589603  | -3.322703 |
| H  | 1.622411  | 0.072560  | -2.621675 |
| Cu | -0.258990 | -0.180865 | 0.363671  |
| H  | -2.404428 | 1.825803  | -2.109483 |
| H  | -2.083676 | 2.084013  | -0.402812 |
| H  | -0.763819 | -0.096960 | -2.151409 |
| H  | 6.170489  | 0.535052  | -1.020976 |
| H  | 4.647003  | 0.113169  | -1.861866 |
| H  | 5.914021  | -1.125001 | -1.632420 |
| C  | 5.579409  | -3.523836 | 0.749124  |
| H  | 6.028774  | -4.454876 | 0.372206  |
| H  | 5.127453  | -3.718613 | 1.736172  |
| H  | 6.384540  | -2.778995 | 0.883368  |
| H  | -2.285352 | 1.505544  | 3.488966  |

|   |           |          |          |
|---|-----------|----------|----------|
| H | -0.188407 | 3.093644 | 3.927761 |
| C | -2.149425 | 1.759310 | 2.424116 |
| H | -2.425767 | 0.891579 | 1.814316 |
| H | -2.830283 | 2.586693 | 2.172939 |
| C | -0.143498 | 3.244864 | 2.836675 |
| N | -0.782376 | 2.120060 | 2.152193 |
| H | -0.659308 | 4.187011 | 2.600571 |
| H | 2.053528  | 3.178766 | 3.082891 |
| C | 0.093373  | 1.386091 | 1.465178 |
| C | 1.290434  | 3.191906 | 2.291302 |
| N | 1.296817  | 1.936135 | 1.545175 |
| H | 1.517816  | 4.027151 | 1.608402 |
| H | 3.231470  | 1.113045 | 1.643330 |
| C | 2.488546  | 1.438827 | 0.901721 |
| H | 2.226985  | 0.576028 | 0.276268 |
| H | 2.929077  | 2.218398 | 0.260513 |

76

Figure 2\_para-H\_pi-allyl\_02 / electronic energy: -3505.17326116 a.u. / lowest freq: 19.34 cm-1

|    |           |           |           |
|----|-----------|-----------|-----------|
| C  | -0.027072 | -0.848331 | -2.079244 |
| C  | -0.496060 | -2.144766 | -1.754368 |
| C  | -0.316033 | -2.646033 | -0.471715 |
| O  | 2.858620  | -3.870731 | -0.541325 |
| P  | 3.154972  | -2.502217 | -0.020819 |
| O  | 2.401886  | -1.868267 | 1.121226  |
| O  | 4.772607  | -2.445853 | 0.288354  |
| O  | 3.040163  | -1.399657 | -1.259437 |
| C  | 5.324145  | -1.283889 | 0.849089  |
| H  | -0.294675 | -0.404094 | -3.039935 |
| H  | 0.880118  | -0.464928 | -1.593536 |
| H  | -1.236134 | -2.617516 | -2.410511 |
| H  | 0.516895  | -2.308565 | 0.164654  |
| H  | -0.847592 | -3.548297 | -0.158527 |
| B  | 0.198178  | 2.546378  | 0.079855  |
| O  | 0.730765  | 3.697016  | 0.596333  |
| O  | 1.153861  | 1.709113  | -0.420666 |
| C  | 2.122957  | 3.742181  | 0.211395  |
| C  | 2.447809  | 2.224633  | -0.037103 |
| C  | 2.930121  | 4.392534  | 1.322192  |
| C  | 2.204278  | 4.584178  | -1.060593 |
| C  | 2.874990  | 1.485163  | 1.227855  |
| C  | 3.434165  | 1.945853  | -1.157854 |
| H  | 2.238405  | 1.750204  | 2.085022  |
| H  | 3.915426  | 1.725825  | 1.492387  |
| H  | 2.787540  | 0.399893  | 1.060879  |
| H  | 3.073472  | 2.328273  | -2.122508 |
| H  | 3.567788  | 0.857395  | -1.243623 |
| H  | 4.408980  | 2.408300  | -0.940344 |
| H  | 1.646394  | 4.119514  | -1.887428 |
| H  | 3.245629  | 4.727659  | -1.382854 |
| H  | 1.763668  | 5.573473  | -0.868182 |
| H  | 4.005959  | 4.343482  | 1.095679  |
| H  | 2.756420  | 3.907025  | 2.291090  |
| H  | 2.652242  | 5.452757  | 1.418189  |
| C  | -3.678746 | 0.284092  | -2.306342 |
| C  | -5.029323 | 0.008921  | -2.498864 |
| C  | -3.218740 | 0.931010  | -1.142551 |
| C  | -5.967783 | 0.379626  | -1.532964 |
| C  | -4.178074 | 1.299142  | -0.183500 |
| C  | -5.532524 | 1.030273  | -0.378633 |
| C  | -1.758801 | 1.177319  | -0.958840 |
| C  | -1.341717 | 2.228990  | 0.058292  |
| H  | -6.256532 | 1.334901  | 0.381549  |
| H  | -3.863255 | 1.809379  | 0.729001  |
| H  | -7.029075 | 0.169090  | -1.683688 |
| H  | -5.354492 | -0.493808 | -3.413339 |
| H  | -2.954034 | -0.009577 | -3.071658 |
| Cu | -1.190876 | -0.672743 | -0.437452 |
| H  | -1.641216 | 1.957150  | 1.086533  |
| H  | -1.875055 | 3.177963  | -0.146998 |
| H  | -1.307546 | 1.401396  | -1.932649 |
| H  | 6.389495  | -1.473800 | 1.051494  |
| H  | 4.828167  | -1.012423 | 1.796098  |
| H  | 5.254611  | -0.421472 | 0.161490  |
| C  | 3.421492  | -1.785391 | -2.553911 |
| H  | 3.169445  | -0.966252 | -3.245234 |
| H  | 2.896384  | -2.700239 | -2.874408 |
| H  | 4.508338  | -1.973330 | -2.622713 |
| H  | -4.148233 | -3.106495 | 0.931266  |
| H  | -3.639203 | -2.361102 | 3.473608  |
| C  | -4.064101 | -2.025606 | 0.731544  |
| H  | -3.707280 | -1.879423 | -0.295926 |
| H  | -5.062989 | -1.572779 | 0.821970  |
| C  | -3.418783 | -1.355261 | 3.086151  |
| N  | -3.142113 | -1.409300 | 1.650310  |
| H  | -4.294618 | -0.715057 | 3.277347  |
| H  | -1.561600 | -1.486657 | 4.278466  |
| C  | -1.964726 | -0.876172 | 1.340641  |
| C  | -2.117677 | -0.768606 | 3.655152  |
| N  | -1.355018 | -0.460993 | 2.445998  |
| H  | -2.283274 | 0.143408  | 4.247221  |
| H  | 0.669732  | -0.663184 | 2.989212  |
| C  | -0.009078 | 0.054147  | 2.503388  |
| H  | 0.359617  | 0.209728  | 1.481630  |
| H  | 0.014392  | 1.008157  | 3.053056  |

64

Figure 2\_L-Cu-OtBu dimer / electronic energy: -4357.97211601 a.u. / lowest freq: -19.85 cm-1

|   |           |           |           |
|---|-----------|-----------|-----------|
| H | -1.057876 | -2.823794 | -2.825878 |
|---|-----------|-----------|-----------|

|    |           |           |           |
|----|-----------|-----------|-----------|
| H  | -1.980246 | -2.667714 | -1.312041 |
| O  | 0.078207  | -1.017819 | -1.258789 |
| C  | -1.048228 | -3.061420 | -1.749889 |
| H  | -1.045898 | -4.158508 | -1.636503 |
| C  | 0.158516  | -2.389922 | -1.074836 |
| H  | 1.475367  | -2.665464 | -2.785121 |
| H  | -0.759805 | -2.350911 | 0.894993  |
| C  | 1.458383  | -2.909326 | -1.710688 |
| C  | 0.156991  | -2.742073 | 0.424044  |
| H  | 2.324017  | -2.413213 | -1.241845 |
| H  | 1.581586  | -3.999730 | -1.600580 |
| H  | 1.020173  | -2.268300 | 0.919277  |
| H  | 0.205803  | -3.828385 | 0.609487  |
| Cu | 1.378579  | 0.329330  | -0.465065 |
| H  | 2.131666  | -0.991227 | 3.381390  |
| H  | 4.682348  | -1.405429 | 2.732758  |
| H  | 5.481708  | -1.718565 | 0.494438  |
| H  | 4.675857  | -1.081458 | -2.009653 |
| C  | 2.171292  | -0.117226 | 2.712040  |
| C  | 4.582052  | -0.512693 | 2.098216  |
| H  | 1.198856  | -0.010984 | 2.213049  |
| N  | 3.192040  | -0.289898 | 1.712946  |
| C  | 3.045354  | -0.000511 | 0.406199  |
| C  | 5.265779  | -0.663084 | 0.738250  |
| N  | 4.251927  | -0.137199 | -0.170576 |
| H  | 3.612584  | 0.354358  | -2.080687 |
| C  | 4.493554  | -0.077568 | -1.587637 |
| H  | 2.354764  | 0.782239  | 3.326204  |
| H  | 4.963659  | 0.354622  | 2.665833  |
| H  | 6.206045  | -0.097525 | 0.661498  |
| H  | 5.369453  | 0.553572  | -1.807185 |
| H  | -0.378809 | 4.066234  | 1.363434  |
| H  | -1.215620 | 2.487467  | 1.315536  |
| C  | -0.309944 | 3.028560  | 0.996342  |
| H  | -1.542344 | 4.628000  | -0.917965 |
| H  | -2.304280 | 3.010119  | -0.908883 |
| H  | 0.559090  | 2.547332  | 1.474899  |
| C  | -1.400215 | 3.570787  | -1.196882 |
| C  | -0.167055 | 2.941122  | -0.531923 |
| H  | 1.054762  | 4.773347  | -0.703921 |
| H  | -1.305843 | 3.511187  | -2.293040 |
| C  | 1.092639  | 3.703570  | -0.968950 |
| O  | -0.065048 | 1.615388  | -0.935560 |
| H  | 1.981855  | 3.258646  | -0.494162 |
| H  | 1.220534  | 3.621154  | -2.060206 |
| Cu | -1.382126 | 0.156912  | -0.516840 |
| H  | -2.351582 | 0.600724  | 3.422431  |
| H  | -4.934218 | -0.004844 | 2.870939  |
| H  | -6.034910 | 0.158807  | 0.756762  |
| H  | -5.219728 | 0.475454  | -1.806850 |
| C  | -2.122775 | -0.170906 | 2.668848  |
| C  | -4.523985 | -0.695038 | 2.117592  |
| H  | -1.198578 | 0.107935  | 2.144915  |
| N  | -3.185413 | -0.283990 | 1.706499  |
| C  | -3.039380 | -0.179163 | 0.373767  |
| C  | -5.297331 | -0.660916 | 0.794239  |
| N  | -4.235455 | -0.434437 | -0.181200 |
| H  | -3.591154 | -0.191053 | -2.134929 |
| C  | -4.528168 | -0.356233 | -1.586950 |
| H  | -1.956896 | -1.128121 | 3.192726  |
| H  | -4.493762 | -1.703279 | 2.564902  |
| H  | -5.829131 | -1.601827 | 0.585031  |
| H  | -4.988412 | -1.291515 | -1.945367 |

32

Figure 2\_L-Cu-OtBu / electronic energy: -2178.96309100 a.u. / lowest freq: 32.39 cm-1

|    |           |           |           |
|----|-----------|-----------|-----------|
| H  | 4.562030  | -0.987762 | -1.171425 |
| H  | 4.380081  | -1.687590 | 0.453032  |
| O  | 2.059982  | -0.792706 | -0.375405 |
| C  | 4.412589  | -0.739884 | -0.108257 |
| H  | 5.285124  | -0.160867 | 0.237784  |
| C  | 3.083853  | 0.016444  | 0.070903  |
| H  | 3.239088  | 1.094749  | -1.813757 |
| H  | 2.816631  | -0.564871 | 2.149701  |
| C  | 3.141678  | 1.325832  | -0.740702 |
| C  | 2.905653  | 0.363686  | 1.562854  |
| H  | 2.203830  | 1.891377  | -0.606175 |
| H  | 3.980920  | 1.980488  | -0.449346 |
| H  | 1.973161  | 0.937231  | 1.704528  |
| H  | 3.740138  | 0.957642  | 1.973285  |
| Cu | 0.281496  | -0.385007 | -0.217334 |
| H  | -2.761249 | -2.831320 | 0.955264  |
| H  | -4.389467 | -0.710878 | 1.073176  |
| H  | -3.900683 | 1.628760  | 1.086134  |
| H  | -1.572215 | 2.982676  | 0.893515  |
| C  | -2.368865 | -2.376101 | 0.031132  |
| C  | -3.894740 | -0.371839 | 0.149702  |
| H  | -1.295333 | -2.593746 | -0.043339 |
| N  | -2.556823 | -0.949305 | 0.044007  |
| C  | -1.588253 | -0.032817 | -0.058431 |
| C  | -3.606305 | 1.135384  | 0.145880  |
| N  | -2.155228 | 1.178072  | -0.017727 |
| H  | -0.385003 | 2.236847  | -0.219836 |
| C  | -1.452620 | 2.433488  | -0.055287 |
| H  | -2.885552 | -2.835640 | -0.827649 |
| H  | -4.517059 | -0.688565 | -0.702765 |
| H  | -4.103640 | 1.662997  | -0.682992 |
| H  | -1.827633 | 3.068788  | -0.873938 |

74

Figure 2\_ed / electronic energy: -3000.72395415 a.u. / lowest freq: -18.37 cm-1

|    |           |           |           |
|----|-----------|-----------|-----------|
| H  | -4.229726 | 2.326034  | -0.150745 |
| H  | -5.967249 | 0.343716  | 0.271356  |
| H  | -3.598722 | -3.318573 | 1.735428  |
| H  | -5.751654 | -1.943746 | 0.936556  |
| H  | -2.602038 | 1.801266  | -0.690477 |
| H  | -2.058957 | -2.801506 | 0.982474  |
| C  | -3.680511 | 1.617234  | -0.792634 |
| C  | -3.082739 | -0.631120 | 0.042698  |
| N  | -3.970093 | 0.257841  | -0.410861 |
| N  | -3.731163 | -1.761591 | 0.333175  |
| C  | -3.126225 | -2.981981 | 0.798743  |
| C  | -5.341967 | -0.246351 | -0.418210 |
| C  | -5.161926 | -1.699720 | 0.039540  |
| H  | -3.978015 | 1.799131  | -1.838489 |
| H  | -5.779726 | -0.163645 | -1.424914 |
| H  | -3.228038 | -3.784690 | 0.049042  |
| H  | -5.421195 | -2.428940 | -0.745075 |
| H  | -1.082452 | 3.518912  | 1.603248  |
| H  | 0.421000  | 3.855965  | 0.726137  |
| O  | 0.362799  | 1.259831  | 1.681643  |
| C  | 0.000087  | 3.675244  | 1.723920  |
| H  | 0.157069  | 4.577191  | 2.336829  |
| C  | 0.647440  | 2.454235  | 2.386838  |
| H  | -1.041587 | 2.096285  | 3.707116  |
| H  | 2.616865  | 2.798759  | 1.517328  |
| C  | 0.046175  | 2.252029  | 3.779325  |
| C  | 2.162870  | 2.651821  | 2.505931  |
| H  | 0.485762  | 1.362278  | 4.255566  |
| H  | 0.231377  | 3.121792  | 4.428639  |
| H  | 2.624169  | 1.758465  | 2.954414  |
| H  | 2.399418  | 3.521663  | 3.139641  |
| Cu | -1.156351 | -0.318937 | 0.168491  |
| H  | 3.647599  | -2.084771 | -1.808356 |
| H  | 4.667626  | -2.150948 | 0.441562  |
| H  | 3.655695  | -0.715072 | 0.059525  |
| C  | 3.791806  | -1.560284 | 0.748890  |
| H  | 3.766971  | -3.811735 | -1.373951 |
| H  | 3.989671  | -1.143848 | 1.747863  |
| C  | 3.071698  | -3.006853 | -1.658071 |
| H  | 2.610722  | -3.279576 | -2.619431 |
| C  | 1.991855  | -2.826667 | -0.601374 |
| C  | 2.522294  | -2.409985 | 0.814491  |
| O  | 1.169976  | -1.706527 | -0.954041 |
| H  | 3.446123  | -4.284636 | 1.408303  |
| B  | 0.804805  | -1.023733 | 0.203641  |
| H  | 3.081088  | -3.176114 | 2.752087  |
| C  | 2.709243  | -3.561359 | 1.790696  |
| O  | 1.472302  | -1.555242 | 1.289645  |
| H  | 1.649931  | -4.980210 | -0.367044 |
| C  | 1.084847  | -4.057441 | -0.565083 |
| H  | 0.586842  | -4.163168 | -1.540589 |
| H  | 1.766043  | -4.089918 | 1.981929  |
| H  | 0.303393  | -3.954382 | 0.202674  |
| H  | 0.142553  | 4.036318  | -1.814791 |
| H  | 2.021822  | 3.781526  | -0.667704 |
| H  | -1.142136 | 3.179841  | -2.691591 |
| C  | -0.059830 | 3.194506  | -2.489871 |
| O  | -0.270892 | 1.738450  | -0.614242 |
| H  | 2.659078  | 3.660530  | -2.329825 |
| C  | 2.572105  | 3.136225  | -1.366163 |
| H  | 0.457094  | 3.377402  | -3.444530 |
| B  | 0.601562  | 1.008532  | 0.304352  |
| H  | 3.586208  | 2.995173  | -0.962469 |
| C  | 0.360180  | 1.861111  | -1.877169 |
| C  | 1.904481  | 1.766240  | -1.514568 |
| O  | 1.926733  | 1.143401  | -0.240157 |
| H  | -1.221585 | 0.778172  | -2.863054 |
| C  | -0.123344 | 0.730502  | -2.793547 |
| H  | 0.281161  | 0.832229  | -3.811835 |
| H  | 0.157572  | -0.257891 | -2.407175 |
| H  | 2.663210  | 1.336698  | -3.516069 |
| C  | 2.714992  | 0.923238  | -2.496709 |
| H  | 3.773217  | 0.915775  | -2.191785 |
| H  | 2.356419  | -0.113387 | -2.509049 |

74

Figure 2\_ts(TB) / electronic energy: -3000.72314236 a.u. / lowest freq: -71.58 cm-1

|   |           |           |           |
|---|-----------|-----------|-----------|
| H | -4.448283 | 1.831801  | -0.546545 |
| H | -6.034945 | -0.274227 | -0.136759 |
| H | -3.216551 | -3.476593 | 1.843614  |
| H | -5.506494 | -2.318901 | 0.990513  |
| H | -2.733610 | 1.438777  | -0.890484 |
| H | -1.787148 | -3.089113 | 0.837440  |
| C | -3.773199 | 1.128838  | -1.061090 |
| C | -2.995601 | -1.009119 | -0.092528 |
| N | -3.958927 | -0.208011 | -0.557112 |
| N | -3.547831 | -2.188579 | 0.211178  |
| C | -2.863967 | -3.303706 | 0.812657  |
| C | -5.261789 | -0.864729 | -0.651030 |
| C | -4.996322 | -2.217748 | 0.017945  |
| H | -3.991266 | 1.174517  | -2.142029 |
| H | -5.558704 | -0.964972 | -1.708457 |
| H | -3.032398 | -4.223784 | 0.230395  |
| H | -5.289878 | -3.073253 | -0.608926 |
| H | -1.889619 | 3.082951  | 1.743967  |
| H | -0.475447 | 3.841768  | 0.978387  |



|    |           |           |           |
|----|-----------|-----------|-----------|
| O  | 0.012370  | 1.213800  | 1.663904  |
| C  | -0.874460 | 3.464722  | 1.930869  |
| H  | -0.944087 | 4.308818  | 2.634747  |
| C  | 0.013393  | 2.358438  | 2.507367  |
| H  | -1.580508 | 1.488051  | 3.697900  |
| H  | 1.869593  | 3.236060  | 1.766788  |
| C  | -0.558425 | 1.872271  | 3.838323  |
| C  | 1.443340  | 2.866966  | 2.709358  |
| H  | 0.060226  | 1.055179  | 4.239327  |
| H  | -0.588936 | 2.683719  | 4.581426  |
| H  | 2.086995  | 2.051714  | 3.072839  |
| H  | 1.463920  | 3.684030  | 3.447489  |
| Cu | -1.064796 | -0.614475 | 0.066837  |
| H  | 4.152179  | -1.222790 | -1.601625 |
| H  | 4.926631  | -1.208560 | 0.732258  |
| H  | 3.609618  | -0.050027 | 0.333136  |
| C  | 3.901707  | -0.891709 | 0.976936  |
| H  | 4.666629  | -2.898230 | -1.268204 |
| H  | 3.893798  | -0.529670 | 2.016219  |
| C  | 3.817631  | -2.267672 | -1.575410 |
| H  | 3.534087  | -2.557519 | -2.598835 |
| C  | 2.634973  | -2.459067 | -0.637358 |
| C  | 2.900430  | -2.039896 | 0.849730  |
| O  | 1.576663  | -1.571157 | -1.014383 |
| H  | 4.231911  | -3.656063 | 1.429621  |
| B  | 0.913650  | -1.122778 | 0.130318  |
| H  | 3.464389  | -2.800114 | 2.789141  |
| C  | 3.297763  | -3.183901 | 1.771368  |
| O  | 1.621543  | -1.531095 | 1.251149  |
| H  | 2.864132  | -4.640428 | -0.558217 |
| C  | 2.093462  | -3.884147 | -0.768821 |
| H  | 1.733821  | -4.037022 | -1.797388 |
| H  | 2.516389  | -3.953389 | 1.826435  |
| H  | 1.245776  | -4.049768 | -0.087193 |
| H  | -0.420230 | 4.054241  | -1.831844 |
| H  | 1.344645  | 4.063200  | -0.458545 |
| H  | -1.457836 | 3.001197  | -2.817127 |
| C  | -0.416657 | 3.197554  | -2.518434 |
| O  | -0.527086 | 1.723785  | -0.642973 |
| H  | 2.129607  | 4.141849  | -2.060330 |
| C  | 2.062456  | 3.564957  | -1.125973 |
| H  | 0.146515  | 3.473608  | -3.422999 |
| B  | 0.378612  | 1.188218  | 0.318412  |
| H  | 3.048455  | 3.588701  | -0.638400 |
| C  | 0.169014  | 1.950819  | -1.865317 |
| C  | 1.669377  | 2.108377  | -1.380171 |
| O  | 1.690769  | 1.442805  | -0.120721 |
| H  | -1.129452 | 0.602593  | -2.935045 |
| C  | -0.047937 | 0.753365  | -2.794138 |
| H  | 0.399213  | 0.929741  | -3.783876 |
| H  | 0.379967  | -0.167761 | -2.378157 |
| H  | 2.645391  | 1.898337  | -3.314327 |
| C  | 2.688765  | 1.457115  | -2.306623 |
| H  | 3.703702  | 1.618116  | -1.911727 |
| H  | 2.515077  | 0.376425  | -2.376759 |

74

Figure 2\_prod / electronic energy: -3000.74272641 a.u. / lowest freq: 20.41 cm<sup>-1</sup>

|    |           |           |           |
|----|-----------|-----------|-----------|
| H  | -3.886200 | 1.904460  | 0.040425  |
| H  | -5.783170 | -0.000028 | 0.231301  |
| H  | -3.671290 | -4.009664 | 0.712028  |
| H  | -5.779110 | -2.391811 | 0.307129  |
| H  | -2.431530 | 1.418920  | -0.867743 |
| H  | -2.156883 | -3.467472 | -0.075581 |
| C  | -3.521445 | 1.318515  | -0.819820 |
| C  | -3.044171 | -1.083929 | -0.477400 |
| N  | -3.884978 | -0.068040 | -0.690769 |
| N  | -3.774686 | -2.199854 | -0.351226 |
| C  | -3.248139 | -3.529587 | -0.185304 |
| C  | -5.293235 | -0.458612 | -0.643950 |
| C  | -5.207063 | -1.984777 | -0.540404 |
| H  | -3.958179 | 1.745967  | -1.737311 |
| H  | -5.823136 | -0.116425 | -1.545676 |
| H  | -3.484024 | -4.160187 | -1.059528 |
| H  | -5.550488 | -2.493752 | -1.456806 |
| H  | -0.953241 | 3.764861  | 3.357981  |
| H  | 0.759299  | 3.428938  | 2.975556  |
| O  | -0.875512 | 1.986080  | 1.406417  |
| C  | -0.148430 | 3.018702  | 3.444873  |
| H  | 0.062558  | 2.860737  | 4.513442  |
| C  | -0.552175 | 1.706030  | 2.774674  |
| H  | -2.662097 | 1.885852  | 3.254227  |
| H  | 1.522396  | 1.080215  | 2.546667  |
| C  | -1.843289 | 1.160855  | 3.378161  |
| C  | 0.563820  | 0.669955  | 2.888868  |
| H  | -2.130100 | 0.224690  | 2.875511  |
| H  | -1.717424 | 0.955828  | 4.451620  |
| H  | 0.344931  | -0.216712 | 2.276614  |
| H  | 0.673948  | 0.353697  | 3.937508  |
| Cu | -1.061912 | -1.136593 | -0.315311 |
| H  | 4.402647  | -0.650240 | -0.989617 |
| H  | 4.621398  | -1.002509 | 1.402523  |
| H  | 3.160136  | -0.085512 | 0.918287  |
| C  | 3.522073  | -0.979220 | 1.447740  |
| H  | 5.192444  | -2.244337 | -0.885959 |
| H  | 3.226802  | -0.887955 | 2.503535  |
| C  | 4.303465  | -1.709747 | -1.255594 |
| H  | 4.297891  | -1.782907 | -2.353926 |

|   |           |           |           |
|---|-----------|-----------|-----------|
| C | 3.032949  | -2.326933 | -0.689967 |
| C | 2.899711  | -2.248976 | 0.864652  |
| O | 1.888776  | -1.577832 | -1.121179 |
| H | 4.481998  | -3.631811 | 1.423538  |
| B | 0.903669  | -1.611522 | -0.123564 |
| H | 3.275879  | -3.326507 | 2.696880  |
| C | 3.409346  | -3.471239 | 1.614104  |
| O | 1.480199  | -2.146878 | 1.031772  |
| H | 3.743816  | -4.379616 | -1.009699 |
| C | 2.869341  | -3.749566 | -1.231268 |
| H | 2.746510  | -3.702507 | -2.323658 |
| H | 2.863688  | -4.380535 | 1.328701  |
| H | 1.973529  | -4.232021 | -0.812859 |
| H | 0.385110  | 4.774697  | -2.173196 |
| H | 1.496802  | 4.695314  | -0.164989 |
| H | -0.507126 | 3.734422  | -3.303777 |
| C | 0.419699  | 3.821781  | -2.717391 |
| O | -0.524972 | 2.690348  | -0.813439 |
| H | 2.757526  | 4.544486  | -1.420219 |
| C | 2.313155  | 4.059293  | -0.539290 |
| H | 1.265214  | 3.846315  | -3.421248 |
| B | -0.030339 | 2.224887  | 0.383639  |
| H | 3.082788  | 4.000577  | 0.244528  |
| C | 0.538550  | 2.632846  | -1.776365 |
| C | 1.822046  | 2.649090  | -0.858748 |
| O | 1.334459  | 2.085967  | 0.372262  |
| H | -0.612874 | 1.326243  | -3.039970 |
| C | 0.375562  | 1.330242  | -2.556106 |
| H | 1.139110  | 1.225440  | -3.340341 |
| H | 0.434150  | 0.455202  | -1.891068 |
| H | 3.294722  | 2.132517  | -2.363615 |
| C | 2.962520  | 1.788006  | -1.372089 |
| H | 3.820345  | 1.859265  | -0.686128 |
| H | 2.658330  | 0.735648  | -1.440404 |

39

Figure 2\_L-Cu-Bpin / electronic energy: -2356.95154150 a.u. / lowest freq: 22.11 cm-1

|    |           |           |           |
|----|-----------|-----------|-----------|
| H  | -4.270736 | -2.604302 | 0.699216  |
| H  | -3.469511 | -2.304962 | -1.601614 |
| C  | -4.343959 | -1.520428 | 0.875987  |
| H  | -4.082488 | -1.334048 | 1.925984  |
| H  | -5.392484 | -1.222875 | 0.718439  |
| C  | -3.691752 | -1.230867 | -1.514808 |
| O  | -2.057742 | -1.109903 | 0.223326  |
| H  | -4.742108 | -1.073870 | -1.802677 |
| C  | -3.418948 | -0.778798 | -0.078579 |
| H  | -3.048558 | -0.694945 | -2.228327 |
| B  | -1.238080 | -0.000001 | -0.000001 |
| H  | -3.048552 | 0.694945  | 2.228328  |
| C  | -3.418947 | 0.778799  | 0.078581  |
| H  | -4.742104 | 1.073871  | 1.802681  |
| O  | -2.057741 | 1.109902  | -0.223328 |
| C  | -3.691747 | 1.230867  | 1.514810  |
| H  | -5.392484 | 1.222879  | -0.718433 |
| H  | -4.082491 | 1.334050  | -1.925981 |
| C  | -4.343959 | 1.520430  | -0.875984 |
| H  | -3.469505 | 2.304963  | 1.601615  |
| H  | -4.270733 | 2.604304  | -0.699213 |
| Cu | 0.797333  | -0.000001 | -0.000002 |
| H  | 3.463333  | -3.022428 | -0.742996 |
| H  | 5.468944  | -1.227903 | -0.850209 |
| H  | 5.489479  | 1.160908  | -0.929040 |
| H  | 3.459252  | 2.934328  | -1.042286 |
| C  | 3.103330  | -2.441738 | 0.122397  |
| C  | 4.991258  | -0.767023 | 0.029199  |
| H  | 2.005088  | -2.444141 | 0.118745  |
| N  | 3.563409  | -1.079451 | 0.055881  |
| C  | 2.777376  | 0.000000  | 0.000000  |
| C  | 4.991258  | 0.767025  | -0.029195 |
| N  | 3.563409  | 1.079451  | -0.055879 |
| H  | 2.005087  | 2.444141  | -0.118746 |
| C  | 3.103329  | 2.441739  | -0.122398 |
| H  | 3.459253  | -2.934329 | 1.042284  |
| H  | 5.489478  | -1.160906 | 0.929045  |
| H  | 5.468941  | 1.227905  | 0.850214  |
| H  | 3.463332  | 3.022430  | 0.742995  |

61

Figure 2\_para-CO2Me\_pcl / electronic energy: -2893.94952148 a.u. / lowest freq: 9.33 cm-1

|   |           |           |           |
|---|-----------|-----------|-----------|
| H | -1.142174 | 0.326395  | 3.043058  |
| H | -1.672288 | 2.930104  | 2.958728  |
| H | -0.410778 | 4.587535  | 1.772325  |
| H | 1.325376  | 4.617521  | -0.336876 |
| C | -1.212426 | 0.337763  | 1.943701  |
| C | -1.711049 | 2.809470  | 1.866209  |
| H | -0.480376 | -0.371680 | 1.536378  |
| N | -0.926823 | 1.653956  | 1.436005  |
| C | -0.110453 | 1.927965  | 0.414095  |
| C | -1.032632 | 3.957955  | 1.112749  |
| N | -0.189267 | 3.239543  | 0.160605  |
| H | 1.150212  | 3.208094  | -1.422766 |
| C | 0.599024  | 3.940252  | -0.817532 |
| H | -2.225259 | 0.008361  | 1.655078  |
| H | -2.766899 | 2.676062  | 1.573693  |
| H | -1.746523 | 4.612421  | 0.591241  |
| H | -0.044230 | 4.539290  | -1.482157 |
| H | -2.821199 | -3.001484 | -0.005036 |
| C | -3.951528 | -1.213186 | -0.399856 |
| C | -2.800099 | -2.008391 | -0.458518 |

|    |           |           |           |
|----|-----------|-----------|-----------|
| H  | -4.808328 | 0.695614  | -0.946093 |
| C  | -3.919421 | 0.063799  | -0.980425 |
| H  | 3.944068  | -3.671481 | 1.547823  |
| C  | -1.645138 | -1.545527 | -1.073006 |
| H  | 3.553935  | -1.740970 | 3.010175  |
| H  | -0.762791 | -2.188488 | -1.089740 |
| C  | -2.765666 | 0.524476  | -1.595558 |
| C  | -1.595840 | -0.261703 | -1.655126 |
| C  | 4.529362  | -3.082680 | 0.825300  |
| C  | 4.280677  | -1.171387 | 2.411938  |
| H  | 4.310395  | -3.471360 | -0.177935 |
| O  | 2.810410  | -1.413679 | 0.543942  |
| H  | -2.753645 | 1.524553  | -2.037177 |
| H  | 5.283774  | -1.356378 | 2.824337  |
| H  | 5.596665  | -3.248067 | 1.039502  |
| C  | 4.172716  | -1.608784 | 0.950122  |
| C  | -0.383471 | 0.290726  | -2.269072 |
| B  | 2.689088  | -0.178377 | -0.087479 |
| H  | 0.906515  | -1.471785 | -2.215757 |
| C  | 0.831452  | -0.397455 | -2.403722 |
| C  | 4.942288  | -0.659595 | -0.028775 |
| H  | 4.397518  | -1.819490 | -1.795866 |
| O  | 3.958341  | 0.350473  | -0.300563 |
| H  | 6.081778  | -2.076921 | -1.258094 |
| H  | 6.921395  | -0.771253 | 0.858890  |
| C  | 5.281639  | -1.328820 | -1.361922 |
| H  | 1.587646  | -0.003612 | -3.089368 |
| C  | 6.186299  | -0.009265 | 0.556866  |
| H  | 5.620621  | -0.559734 | -2.071963 |
| H  | 6.660135  | 0.638253  | -0.196393 |
| Cu | 0.907932  | 0.621506  | -0.664812 |
| H  | -0.511359 | 1.245360  | -2.789607 |
| H  | 4.048013  | -0.102353 | 2.527113  |
| H  | 5.947121  | 0.611885  | 1.430264  |
| O  | -5.218902 | -2.844335 | 0.798992  |
| H  | -7.203768 | -1.524638 | 1.976330  |
| C  | -5.155737 | -1.752978 | 0.281861  |
| H  | -7.775958 | -2.231095 | 0.435060  |
| C  | -7.376520 | -1.322502 | 0.908973  |
| O  | -6.182131 | -0.896940 | 0.270949  |
| H  | -8.095015 | -0.501903 | 0.799125  |

61

Figure 2 para-CO2Me ts(CuBadd) / electronic energy: -2893.94492610 a.u. / lowest freq: -121.71 cm<sup>-1</sup>

|    |           |           |           |
|----|-----------|-----------|-----------|
| H  | -0.026999 | 1.140106  | 3.265072  |
| H  | 0.014985  | 3.738814  | 3.095139  |
| H  | 1.051062  | 5.100131  | 1.417880  |
| H  | 2.004952  | 4.687899  | -1.115892 |
| C  | -0.362395 | 1.080737  | 2.218022  |
| C  | -0.421688 | 3.605299  | 2.094447  |
| H  | 0.163965  | 0.250481  | 1.727676  |
| N  | -0.049969 | 2.309166  | 1.532440  |
| C  | 0.406907  | 2.399063  | 0.279489  |
| C  | 0.145466  | 4.582235  | 1.058629  |
| N  | 0.482583  | 3.692340  | -0.050204 |
| H  | 1.153407  | 3.375470  | -1.987482 |
| C  | 1.026202  | 4.205465  | -1.279522 |
| H  | -1.446176 | 0.874745  | 2.208777  |
| H  | -1.518533 | 3.679027  | 2.187354  |
| H  | -0.581350 | 5.344806  | 0.742898  |
| H  | 0.343454  | 4.946730  | -1.723917 |
| H  | -2.582847 | -2.331186 | 0.985986  |
| C  | -3.886763 | -1.142497 | -0.248728 |
| C  | -2.634826 | -1.651387 | 0.132010  |
| H  | -4.902677 | 0.129998  | -1.674419 |
| C  | -3.939393 | -0.271701 | -1.354113 |
| H  | 2.554836  | -3.496087 | 2.244144  |
| C  | -1.479242 | -1.307693 | -0.548973 |
| H  | 2.893249  | -1.209492 | 3.061869  |
| H  | -0.524361 | -1.712470 | -0.204080 |
| C  | -2.789964 | 0.078382  | -2.036994 |
| C  | -1.511146 | -0.413611 | -1.656905 |
| C  | 3.223025  | -3.356664 | 1.381181  |
| C  | 3.708755  | -1.096414 | 2.332095  |
| H  | 2.801168  | -3.915765 | 0.535830  |
| O  | 2.086924  | -1.378203 | 0.599463  |
| H  | -2.857988 | 0.761491  | -2.888517 |
| H  | 4.635115  | -1.468790 | 2.793333  |
| H  | 4.202002  | -3.790240 | 1.636354  |
| C  | 3.354598  | -1.875287 | 1.065792  |
| C  | -0.317973 | 0.003135  | -2.349764 |
| B  | 2.325473  | -0.404737 | -0.356204 |
| H  | 0.988943  | -1.657112 | -1.774052 |
| C  | 0.976512  | -0.612112 | -2.110466 |
| C  | 4.296904  | -1.540412 | -0.143061 |
| H  | 3.269405  | -2.906778 | -1.503105 |
| O  | 3.654603  | -0.381816 | -0.714160 |
| H  | 4.823625  | -3.531143 | -0.886550 |
| H  | 6.208983  | -2.024480 | 0.758194  |
| C  | 4.294605  | -2.626030 | -1.218421 |
| C  | 1.737300  | -0.426084 | -2.877427 |
| C  | 5.724082  | -1.183677 | 0.238946  |
| H  | 4.800753  | -2.241265 | -2.116017 |
| H  | 6.307983  | -0.962856 | -0.667122 |
| Cu | 0.838682  | 0.880803  | -0.838244 |
| H  | -0.443435 | 0.651998  | -3.221307 |
| H  | 3.827841  | -0.022714 | 2.123417  |
| H  | 5.762785  | -0.300290 | 0.889905  |

|   |           |           |          |
|---|-----------|-----------|----------|
| O | -5.074107 | -2.263259 | 1.492314 |
| H | -7.377192 | -0.968063 | 1.771513 |
| C | -5.081986 | -1.535806 | 0.522972 |
| H | -7.595197 | -2.402569 | 0.727113 |
| C | -7.411047 | -1.317839 | 0.728685 |
| O | -6.213634 | -0.998982 | 0.041768 |
| H | -8.220581 | -0.805506 | 0.194874 |

61

Figure 2 para-CO2Me L-Cu-alkyl\_01 / electronic energy: -2894.00090787 a.u. / lowest freq: 16.20 cm-1

|    |           |           |           |
|----|-----------|-----------|-----------|
| H  | -0.563035 | 1.663586  | 2.354290  |
| H  | 1.603693  | 3.173507  | 2.675584  |
| H  | 3.521438  | 3.755636  | 1.358673  |
| H  | 4.401164  | 2.529675  | -0.791014 |
| C  | -0.692409 | 2.178424  | 1.387419  |
| C  | 1.342365  | 3.634353  | 1.707783  |
| H  | -1.093556 | 1.461548  | 0.658374  |
| N  | 0.564976  | 2.691680  | 0.905738  |
| C  | 1.235845  | 2.230171  | -0.155286 |
| C  | 2.569053  | 3.881422  | 0.822620  |
| N  | 2.416078  | 2.855878  | -0.207738 |
| H  | 3.148621  | 1.797189  | -1.835045 |
| C  | 3.406539  | 2.682059  | -1.238406 |
| H  | -1.421115 | 2.993331  | 1.522271  |
| H  | 0.767191  | 4.549470  | 1.911444  |
| H  | 2.565334  | 4.884188  | 0.363826  |
| H  | 3.455368  | 3.562439  | -1.901635 |
| H  | -3.052972 | -2.039004 | 1.211582  |
| C  | -3.887840 | -0.550380 | -0.098490 |
| C  | -2.880801 | -1.434250 | 0.317614  |
| H  | -4.426803 | 0.897020  | -1.616020 |
| C  | -3.654765 | 0.211823  | -1.260163 |
| H  | 1.599352  | -3.363935 | 2.895954  |
| C  | -1.688507 | -1.555639 | -0.379304 |
| H  | 0.460775  | -1.282959 | 2.336220  |
| H  | -0.926399 | -2.243937 | -0.010540 |
| C  | -2.465299 | 0.100394  | -1.953056 |
| C  | -1.419648 | -0.774837 | -1.537067 |
| C  | 2.514971  | -3.082717 | 2.355038  |
| C  | 1.392505  | -0.892402 | 1.901536  |
| H  | 2.943103  | -3.994267 | 1.918041  |
| O  | 1.341147  | -2.645038 | 0.291919  |
| H  | -2.310697 | 0.708236  | -2.849901 |
| H  | 1.954612  | -0.379209 | 2.695356  |
| H  | 3.229813  | -2.674989 | 3.085989  |
| C  | 2.185941  | -2.048506 | 1.291935  |
| C  | -0.148475 | -0.803264 | -2.255879 |
| B  | 1.640173  | -2.057359 | -0.913530 |
| H  | 0.104093  | -3.002211 | -2.223401 |
| C  | 0.719434  | -2.081566 | -2.182211 |
| C  | 3.414674  | -1.565798 | 0.435009  |
| H  | 4.055651  | -3.593463 | -0.062911 |
| O  | 2.821409  | -1.358002 | -0.858157 |
| H  | 5.033614  | -2.811620 | 1.211108  |
| H  | 4.408487  | -0.360257 | 1.940528  |
| C  | 4.488441  | -2.639033 | 0.271972  |
| H  | 1.372151  | -2.100205 | -3.070684 |
| C  | 4.039993  | -0.263018 | 0.908035  |
| H  | 5.211225  | -2.309412 | -0.488842 |
| H  | 4.895206  | -0.005763 | 0.265402  |
| Cu | 0.623203  | 0.762399  | -1.271416 |
| H  | -0.297181 | -0.477407 | -3.298249 |
| H  | 1.121912  | -0.156882 | 1.128018  |
| H  | 3.320019  | 0.563849  | 0.862457  |
| O  | -5.358671 | -1.077618 | 1.706296  |
| H  | -7.126850 | 0.944146  | 1.824088  |
| C  | -5.135859 | -0.467134 | 0.683028  |
| H  | -7.774067 | -0.463069 | 0.930803  |
| C  | -7.268733 | 0.508219  | 0.823459  |
| O  | -6.033914 | 0.371946  | 0.142976  |
| H  | -7.885604 | 1.178869  | 0.213179  |

61

Figure 2 para-CO2Me L-Cu-alkyl\_02 / electronic energy: -2893.99404152 a.u. / lowest freq: 8.62 cm-1

|   |           |           |           |
|---|-----------|-----------|-----------|
| O | -2.300529 | 4.471530  | 1.294012  |
| H | -1.941079 | 6.754352  | 0.051792  |
| C | -1.865274 | 4.100254  | 0.225742  |
| H | -3.528042 | 6.092778  | -0.440142 |
| C | -2.465274 | 6.166049  | -0.715944 |
| O | -1.885858 | 4.881631  | -0.864411 |
| H | -2.370402 | 6.662630  | -1.689052 |
| B | -1.699597 | -2.313396 | 0.197374  |
| O | -2.498071 | -2.209306 | 1.306718  |
| O | -2.432634 | -2.361092 | -0.961443 |
| C | -3.870720 | -2.331823 | 0.891830  |
| C | -3.786554 | -1.995596 | -0.644707 |
| C | -4.719651 | -1.368694 | 1.707076  |
| C | -4.295936 | -3.772854 | 1.169358  |
| C | -3.925745 | -0.502196 | -0.939942 |
| C | -4.736290 | -2.792844 | -1.524489 |
| H | -3.248330 | 0.097167  | -0.313947 |
| H | -4.955389 | -0.150329 | -0.780791 |
| H | -3.658365 | -0.319607 | -1.991056 |
| H | -4.556379 | -3.872961 | -1.446302 |
| H | -4.596901 | -2.503202 | -2.576655 |
| H | -5.783451 | -2.589930 | -1.253470 |
| H | -3.696151 | -4.488115 | 0.587026  |
| H | -5.358390 | -3.935215 | 0.936937  |
| H | -4.140782 | -3.991426 | 2.236251  |

|    |           |           |           |
|----|-----------|-----------|-----------|
| H  | -5.760098 | -1.366223 | 1.348373  |
| H  | -4.327424 | -0.344372 | 1.657678  |
| H  | -4.724659 | -1.678312 | 2.762987  |
| C  | -0.255115 | 1.119702  | -1.487850 |
| C  | -0.794390 | 2.378185  | -1.295300 |
| C  | -0.148246 | 0.171668  | -0.434602 |
| C  | -1.265878 | 2.775191  | -0.029699 |
| C  | -0.629970 | 0.594013  | 0.832854  |
| C  | -1.172117 | 1.855315  | 1.024943  |
| C  | 0.434060  | -1.154910 | -0.657350 |
| C  | -0.126614 | -2.298146 | 0.222257  |
| H  | -1.542445 | 2.147933  | 2.010538  |
| H  | -0.587172 | -0.094193 | 1.679318  |
| H  | -0.866289 | 3.071779  | -2.135368 |
| H  | 0.094648  | 0.834563  | -2.484760 |
| Cu | 2.359222  | -0.803852 | -0.335320 |
| H  | 0.225742  | -2.242442 | 1.266611  |
| H  | 0.258767  | -3.259333 | -0.160675 |
| H  | 0.331399  | -1.419207 | -1.723545 |
| H  | 5.700360  | -3.085851 | -0.987258 |
| H  | 7.147803  | -1.391894 | 0.523071  |
| C  | 5.231421  | -2.174792 | -1.393604 |
| H  | 4.180064  | -2.389763 | -1.627081 |
| H  | 6.399530  | 0.258624  | 2.083064  |
| N  | 5.284139  | -1.100031 | -0.437357 |
| C  | 6.563872  | -0.587736 | 0.049330  |
| H  | 5.754845  | -1.901649 | -2.324864 |
| C  | 4.227908  | -0.444308 | 0.053472  |
| C  | 6.127418  | 0.497906  | 1.042005  |
| H  | 4.008923  | 1.233824  | 2.742290  |
| H  | 7.157927  | -0.185805 | -0.787457 |
| N  | 4.673894  | 0.497528  | 0.889786  |
| C  | 3.851343  | 1.391774  | 1.662477  |
| H  | 6.543648  | 1.488732  | 0.803853  |
| H  | 2.795747  | 1.201088  | 1.428031  |
| H  | 4.083901  | 2.443493  | 1.428892  |

61

Figure 2\_para-CO2Me\_L-Cu-alkyl\_03 / electronic energy: -2893.99568367 a.u. / lowest freq: 9.65 cm<sup>-1</sup>

|    |           |           |           |
|----|-----------|-----------|-----------|
| B  | -2.273185 | -1.754723 | -0.315655 |
| O  | -3.225853 | -2.267701 | -1.161167 |
| O  | -2.836454 | -1.156583 | 0.784762  |
| C  | -4.515204 | -1.820473 | -0.705637 |
| C  | -4.234549 | -1.500493 | 0.806806  |
| C  | -5.542865 | -2.915455 | -0.941410 |
| C  | -4.872988 | -0.577419 | -1.519147 |
| C  | -4.377530 | -2.722876 | 1.712673  |
| C  | -5.036946 | -0.340475 | 1.372141  |
| H  | -3.831437 | -3.589384 | 1.311026  |
| H  | -5.431275 | -3.006382 | 1.847219  |
| H  | -3.956068 | -2.486027 | 2.700509  |
| H  | -4.853661 | 0.594060  | 0.827716  |
| H  | -4.768330 | -0.177690 | 2.426486  |
| H  | -6.114177 | -0.561713 | 1.327792  |
| H  | -4.149793 | 0.234032  | -1.347828 |
| H  | -5.879086 | -0.207184 | -1.274959 |
| H  | -4.850270 | -0.829624 | -2.589541 |
| H  | -6.514072 | -2.633659 | -0.507401 |
| H  | -5.226913 | -3.870930 | -0.502628 |
| H  | -5.685698 | -3.069541 | -2.021213 |
| C  | 2.501773  | -0.936814 | 1.284050  |
| C  | 3.874083  | -0.940121 | 1.129961  |
| C  | 1.613383  | -1.228055 | 0.208238  |
| C  | 4.460220  | -1.246578 | -0.114349 |
| C  | 2.228584  | -1.570609 | -1.025669 |
| C  | 3.606670  | -1.568858 | -1.179743 |
| C  | 0.168777  | -1.130086 | 0.386324  |
| C  | -0.734373 | -1.875032 | -0.594605 |
| H  | 4.049697  | -1.824756 | -2.145466 |
| H  | 1.603564  | -1.830888 | -1.882665 |
| H  | 4.516214  | -0.702343 | 1.980538  |
| H  | 2.072657  | -0.687278 | 2.259458  |
| Cu | -0.121125 | 0.833403  | 0.224340  |
| H  | -0.507536 | -2.965108 | -0.637408 |
| H  | -0.584087 | -1.536274 | -1.636391 |
| H  | -0.109547 | -1.337269 | 1.433966  |
| H  | -3.617938 | 2.768030  | -0.599760 |
| H  | -2.253653 | 5.081079  | -1.001679 |
| C  | -2.906658 | 2.608797  | 0.226960  |
| H  | -2.703973 | 1.533135  | 0.326186  |
| H  | 0.084067  | 5.356874  | -1.429409 |
| N  | -1.666341 | 3.296117  | -0.021938 |
| C  | -1.620394 | 4.749974  | -0.164732 |
| H  | -3.376298 | 2.966088  | 1.159022  |
| C  | -0.456777 | 2.727615  | -0.009810 |
| C  | -0.127060 | 5.007949  | -0.405145 |
| H  | 2.238919  | 3.722360  | -1.315233 |
| H  | -1.992838 | 5.233210  | 0.753729  |
| N  | 0.457047  | 3.684470  | -0.193970 |
| C  | 1.877605  | 3.475016  | -0.302986 |
| H  | 0.300431  | 5.739433  | 0.297243  |
| H  | 2.099433  | 2.419770  | -0.095797 |
| H  | 2.421159  | 4.102251  | 0.421590  |
| O  | 6.460555  | -1.491126 | -1.394487 |
| H  | 8.324204  | -0.111880 | -0.113306 |
| C  | 5.918134  | -1.242480 | -0.339355 |
| H  | 8.436991  | -1.839214 | 0.331563  |
| C  | 8.023586  | -0.864544 | 0.630808  |

|   |          |           |          |
|---|----------|-----------|----------|
| O | 6.614471 | -0.921019 | 0.762443 |
| H | 8.416348 | -0.584835 | 1.615768 |

61

Figure 2\_para-CO2Me\_ts(BHE) / electronic energy: -2893.94910035 a.u. / lowest freq: -771.32 cm<sup>-1</sup>

|    |           |           |           |
|----|-----------|-----------|-----------|
| B  | -2.603071 | -1.261221 | -0.270209 |
| O  | -3.524621 | -1.865861 | -1.079070 |
| O  | -3.158527 | -0.724958 | 0.859803  |
| C  | -4.830951 | -1.498769 | -0.590803 |
| C  | -4.534208 | -1.150124 | 0.914847  |
| C  | -5.788195 | -2.660747 | -0.795430 |
| C  | -5.283288 | -0.287414 | -1.404074 |
| C  | -4.588217 | -2.369268 | 1.833053  |
| C  | -5.381459 | -0.024044 | 1.484161  |
| H  | -3.995877 | -3.203691 | 1.429295  |
| H  | -5.620236 | -2.715661 | 1.986884  |
| H  | -4.166574 | -2.097831 | 2.811938  |
| H  | -5.218731 | 0.919123  | 0.946344  |
| H  | -5.124557 | 0.140062  | 2.541204  |
| H  | -6.450949 | -0.278273 | 1.431273  |
| H  | -4.603905 | 0.566547  | -1.261942 |
| H  | -6.301981 | 0.025436  | -1.133644 |
| H  | -5.275992 | -0.549612 | -2.472236 |
| H  | -6.763667 | -2.443839 | -0.334759 |
| H  | -5.395860 | -3.590685 | -0.363359 |
| H  | -5.950116 | -2.827749 | -1.870509 |
| C  | 2.186526  | -1.178006 | 1.395686  |
| C  | 3.556066  | -1.285718 | 1.249078  |
| C  | 1.303611  | -1.231668 | 0.280884  |
| C  | 4.135786  | -1.467422 | -0.021712 |
| C  | 1.907032  | -1.436047 | -0.991247 |
| C  | 3.279882  | -1.546679 | -1.131287 |
| C  | -0.114448 | -1.050129 | 0.458435  |
| C  | -1.083003 | -1.168084 | -0.610678 |
| H  | 3.718273  | -1.693670 | -2.121228 |
| H  | 1.282009  | -1.486075 | -1.885748 |
| H  | 4.200657  | -1.228736 | 2.128429  |
| H  | 1.762080  | -1.028639 | 2.392516  |
| Cu | -0.454919 | 0.768497  | -0.529055 |
| H  | -0.791539 | -1.745204 | -1.496217 |
| H  | -1.452223 | 0.118200  | -1.587763 |
| H  | -0.480174 | -0.947178 | 1.484290  |
| H  | -2.581094 | 4.327696  | -0.208078 |
| H  | -0.297360 | 5.680685  | -0.080382 |
| C  | -2.065625 | 3.511852  | 0.322785  |
| H  | -2.422756 | 2.550665  | -0.070766 |
| H  | 1.864604  | 4.971573  | -0.832948 |
| N  | -0.643175 | 3.599069  | 0.121767  |
| C  | 0.092470  | 4.811971  | 0.470566  |
| H  | -2.324020 | 3.575361  | 1.393708  |
| C  | 0.156815  | 2.574320  | -0.196946 |
| C  | 1.527244  | 4.445063  | 0.075914  |
| H  | 3.057180  | 2.636279  | -1.452119 |
| H  | -0.009911 | 5.019312  | 1.549268  |
| N  | 1.419511  | 3.011693  | -0.187154 |
| C  | 2.583097  | 2.239505  | -0.538666 |
| H  | 2.258283  | 4.642525  | 0.873831  |
| H  | 2.291182  | 1.197302  | -0.717220 |
| H  | 3.326233  | 2.261360  | 0.274104  |
| O  | 6.123970  | -1.733866 | -1.313374 |
| H  | 8.107567  | -0.803478 | 0.134703  |
| C  | 5.591543  | -1.579490 | -0.235566 |
| H  | 7.999530  | -2.570942 | 0.375084  |
| C  | 7.704285  | -1.593620 | 0.785446  |
| O  | 6.295923  | -1.491366 | 0.902979  |
| H  | 8.109856  | -1.480981 | 1.798024  |

61

Figure 2\_para-CO2Me\_pc2 / electronic energy: -2893.97546090 a.u. / lowest freq: 25.51 cm<sup>-1</sup>

|   |           |           |           |
|---|-----------|-----------|-----------|
| B | -2.699138 | -1.202332 | -0.021925 |
| O | -3.723697 | -1.841396 | -0.663401 |
| O | -3.143953 | -0.280554 | 0.897228  |
| C | -4.934492 | -1.118431 | -0.364039 |
| C | -4.573339 | -0.416152 | 0.997927  |
| C | -6.093566 | -2.097870 | -0.287156 |
| C | -5.155387 | -0.123903 | -1.501968 |
| C | -4.858485 | -1.292644 | 2.216016  |
| C | -5.188544 | 0.961080  | 1.186823  |
| H | -4.421613 | -2.295819 | 2.100036  |
| H | -5.938090 | -1.400412 | 2.394006  |
| H | -4.407990 | -0.828673 | 3.105839  |
| H | -4.872532 | 1.660537  | 0.402020  |
| H | -4.877957 | 1.376602  | 2.157133  |
| H | -6.287337 | 0.899432  | 1.180790  |
| H | -4.327819 | 0.597560  | -1.571864 |
| H | -6.099150 | 0.426590  | -1.378988 |
| H | -5.199236 | -0.673309 | -2.453715 |
| H | -7.013695 | -1.584582 | 0.030217  |
| H | -5.889487 | -2.918514 | 0.413103  |
| H | -6.274425 | -2.537379 | -1.279318 |
| C | 2.082343  | -0.298514 | 1.244787  |
| C | 3.462904  | -0.425751 | 1.173640  |
| C | 1.236728  | -1.031645 | 0.393598  |
| C | 4.040315  | -1.300647 | 0.243778  |
| C | 1.827338  | -1.906100 | -0.533863 |
| C | 3.208070  | -2.038808 | -0.605488 |
| C | -0.221643 | -0.818211 | 0.479917  |
| C | -1.194622 | -1.450010 | -0.289866 |
| H | 3.659708  | -2.721714 | -1.327635 |

|    |           |           |           |
|----|-----------|-----------|-----------|
| H  | 1.201941  | -2.490155 | -1.211305 |
| H  | 4.101351  | 0.156256  | 1.839664  |
| H  | 1.639969  | 0.395361  | 1.964546  |
| Cu | -0.773979 | 0.396482  | -1.121573 |
| H  | -0.907326 | -2.210737 | -1.023171 |
| H  | -1.637350 | 0.425595  | -2.457024 |
| H  | -0.546881 | -0.241411 | 1.353074  |
| H  | -1.894177 | 3.747139  | 0.750574  |
| H  | 0.583232  | 4.827959  | 0.277293  |
| C  | -1.318858 | 2.859469  | 1.065150  |
| H  | -1.890732 | 1.956013  | 0.809947  |
| H  | 2.577427  | 4.125170  | -0.853692 |
| N  | -0.033481 | 2.812251  | 0.416837  |
| C  | 0.966506  | 3.856411  | 0.633894  |
| H  | -1.195257 | 2.898181  | 2.159075  |
| C  | 0.298320  | 1.972091  | -0.568673 |
| C  | 2.144879  | 3.349846  | -0.204715 |
| H  | 2.729498  | 2.178631  | -2.706780 |
| H  | 1.207290  | 3.956790  | 1.702426  |
| N  | 1.524086  | 2.287811  | -0.993467 |
| C  | 2.290447  | 1.520273  | -1.940641 |
| H  | 2.956009  | 2.929793  | 0.415383  |
| H  | 1.626412  | 0.797982  | -2.433523 |
| H  | 3.107400  | 0.971278  | -1.441203 |
| O  | 6.048085  | -2.233755 | -0.654122 |
| H  | 8.010747  | -0.565155 | -0.043198 |
| C  | 5.514458  | -1.478370 | 0.123345  |
| H  | 7.928048  | -1.840347 | 1.210498  |
| C  | 7.610851  | -0.820277 | 0.948891  |
| O  | 6.195157  | -0.707426 | 0.973384  |
| H  | 7.988787  | -0.111404 | 1.694588  |

61

Figure 2\_para-CO2Me\_ts(H>B) / electronic energy: -2893.96254522 a.u. / lowest freq: -339.78 cm<sup>-1</sup>

|    |           |           |           |
|----|-----------|-----------|-----------|
| B  | -2.691157 | -0.874132 | -0.326803 |
| O  | -3.737405 | -1.659424 | -0.841052 |
| O  | -3.169335 | -0.089544 | 0.754215  |
| C  | -4.961335 | -1.086435 | -0.386922 |
| C  | -4.535466 | -0.426232 | 0.979571  |
| C  | -6.002829 | -2.189392 | -0.253186 |
| C  | -5.434920 | -0.058304 | -1.417596 |
| C  | -4.578369 | -1.414684 | 2.147602  |
| C  | -5.313398 | 0.831930  | 1.340984  |
| H  | -4.039704 | -2.341787 | 1.901324  |
| H  | -5.608577 | -1.672301 | 2.435712  |
| H  | -4.082961 | -0.958672 | 3.018024  |
| H  | -5.185370 | 1.617749  | 0.584575  |
| H  | -4.954226 | 1.229625  | 2.302712  |
| H  | -6.388153 | 0.616812  | 1.445610  |
| H  | -4.719768 | 0.770120  | -1.520584 |
| H  | -6.418883 | 0.358521  | -1.156904 |
| H  | -5.520292 | -0.551491 | -2.397713 |
| H  | -6.928038 | -1.803656 | 0.202153  |
| H  | -5.631757 | -3.023390 | 0.357247  |
| H  | -6.255089 | -2.587429 | -1.247799 |
| C  | 2.066865  | -0.333047 | 1.234354  |
| C  | 3.448559  | -0.439851 | 1.140869  |
| C  | 1.217751  | -1.125235 | 0.442207  |
| C  | 4.022775  | -1.355705 | 0.250197  |
| C  | 1.805928  | -2.048936 | -0.438231 |
| C  | 3.186519  | -2.161502 | -0.532439 |
| C  | -0.239554 | -0.911114 | 0.531958  |
| C  | -1.202364 | -1.411243 | -0.307336 |
| H  | 3.636323  | -2.880157 | -1.220301 |
| H  | 1.175077  | -2.688430 | -1.059112 |
| H  | 4.089689  | 0.189843  | 1.759376  |
| H  | 1.626674  | 0.392923  | 1.923288  |
| Cu | -0.967180 | 0.585829  | -0.973267 |
| H  | -0.888359 | -2.059724 | -1.137286 |
| H  | -2.431144 | 0.243720  | -1.574067 |
| H  | -0.562827 | -0.320931 | 1.398836  |
| H  | -1.429194 | 3.997578  | 1.149365  |
| H  | 1.141014  | 4.741123  | 0.465297  |
| C  | -0.987852 | 2.992052  | 1.251750  |
| H  | -1.732053 | 2.243441  | 0.945716  |
| H  | 2.794371  | 3.873272  | -1.028899 |
| N  | 0.189173  | 2.852548  | 0.433189  |
| C  | 1.373470  | 3.679783  | 0.652275  |
| H  | -0.743162 | 2.827672  | 2.313738  |
| C  | 0.309720  | 2.021977  | -0.607005 |
| C  | 2.365559  | 3.105239  | -0.367660 |
| H  | 2.552597  | 1.944555  | -2.945954 |
| H  | 1.725228  | 3.588308  | 1.691311  |
| N  | 1.533761  | 2.170862  | -1.122545 |
| C  | 2.111305  | 1.334483  | -2.141825 |
| H  | 3.199557  | 2.562884  | 0.109743  |
| H  | 1.328625  | 0.696283  | -2.571997 |
| H  | 2.901064  | 0.688424  | -1.720812 |
| O  | 6.028198  | -2.286430 | -0.654593 |
| H  | 7.954167  | -0.506191 | -0.192454 |
| C  | 5.496899  | -1.506206 | 0.099697  |
| H  | 7.956338  | -1.751206 | 1.094088  |
| C  | 7.597870  | -0.748454 | 0.819404  |
| O  | 6.181110  | -0.677644 | 0.890639  |
| H  | 7.978967  | -0.010149 | 1.534346  |

61

Figure 2\_para-CO2Me\_int1 / electronic energy: -2893.96426596 a.u. / lowest freq: 12.16 cm<sup>-1</sup>

|   |           |           |           |
|---|-----------|-----------|-----------|
| B | -2.801105 | -0.407026 | -0.409596 |
|---|-----------|-----------|-----------|

|    |           |           |           |
|----|-----------|-----------|-----------|
| O  | -3.812792 | -1.087511 | -1.168259 |
| O  | -3.348864 | -0.117024 | 0.895995  |
| C  | -5.049458 | -0.868406 | -0.511444 |
| C  | -4.606899 | -0.761104 | 0.993602  |
| C  | -5.985792 | -2.030904 | -0.815097 |
| C  | -5.668209 | 0.436972  | -1.025671 |
| C  | -4.395820 | -2.138867 | 1.632207  |
| C  | -5.534648 | 0.072455  | 1.868968  |
| H  | -3.761153 | -2.774120 | 0.996089  |
| H  | -5.344264 | -2.665299 | 1.820023  |
| H  | -3.881148 | -2.006818 | 2.596226  |
| H  | -5.587845 | 1.112920  | 1.520712  |
| H  | -5.161115 | 0.084207  | 2.904797  |
| H  | -6.553267 | -0.346368 | 1.882290  |
| H  | -5.040123 | 1.304793  | -0.775533 |
| H  | -6.674745 | 0.607431  | -0.614422 |
| H  | -5.750731 | 0.384354  | -2.122066 |
| H  | -6.916771 | -1.956768 | -0.231219 |
| H  | -5.509460 | -2.996295 | -0.597398 |
| H  | -6.255525 | -2.025124 | -1.882697 |
| C  | 1.931763  | -0.476218 | 1.247321  |
| C  | 3.306348  | -0.641141 | 1.135760  |
| C  | 1.043723  | -1.184773 | 0.420678  |
| C  | 3.830563  | -1.540920 | 0.199077  |
| C  | 1.579714  | -2.101915 | -0.497924 |
| C  | 2.953325  | -2.278021 | -0.605735 |
| C  | -0.398231 | -0.883228 | 0.508873  |
| C  | -1.330820 | -1.061721 | -0.462969 |
| H  | 3.365872  | -2.990717 | -1.322622 |
| H  | 0.912174  | -2.686438 | -1.134818 |
| H  | 3.979013  | -0.067888 | 1.775090  |
| H  | 1.529972  | 0.237838  | 1.971119  |
| Cu | -1.044239 | 1.102216  | -0.696719 |
| H  | -0.998800 | -1.514967 | -1.409946 |
| H  | -2.636051 | 0.860525  | -1.046443 |
| H  | -0.719189 | -0.433826 | 1.458183  |
| H  | -0.244068 | 4.507237  | 1.547981  |
| H  | 2.267415  | 4.543546  | 0.465540  |
| C  | -0.102993 | 3.413932  | 1.571441  |
| H  | -1.069833 | 2.927626  | 1.384920  |
| H  | 3.315982  | 3.362027  | -1.326647 |
| N  | 0.837830  | 2.988742  | 0.568963  |
| C  | 2.224519  | 3.449612  | 0.592019  |
| H  | 0.246109  | 3.131426  | 2.578070  |
| C  | 0.563882  | 2.185360  | -0.462405 |
| C  | 2.843292  | 2.693306  | -0.591238 |
| H  | 2.197679  | 1.637388  | -3.176162 |
| H  | 2.698421  | 3.201670  | 1.554438  |
| N  | 1.685027  | 2.017172  | -1.170391 |
| C  | 1.838799  | 1.110151  | -2.277498 |
| H  | 3.593040  | 1.948377  | -0.276192 |
| H  | 0.866461  | 0.649722  | -2.498992 |
| H  | 2.558468  | 0.312343  | -2.029387 |
| O  | 5.786541  | -2.536062 | -0.746005 |
| H  | 7.786223  | -0.842283 | -0.295062 |
| C  | 5.296095  | -1.744939 | 0.024130  |
| H  | 7.756496  | -2.088185 | 0.990471  |
| C  | 7.433731  | -1.072001 | 0.720996  |
| O  | 6.021530  | -0.947572 | 0.810019  |
| H  | 7.850616  | -0.349289 | 1.431921  |

61

Figure 2 para-CO2Me ts(Cu>O) / electronic energy: -2893.95949767 a.u. / lowest freq: -41.11 cm<sup>-1</sup>

|    |           |           |           |
|----|-----------|-----------|-----------|
| B  | -2.088606 | -1.288405 | -0.714448 |
| O  | -2.953107 | -2.371191 | -1.080934 |
| O  | -2.498216 | -0.848498 | 0.617654  |
| C  | -4.133613 | -2.247251 | -0.305003 |
| C  | -3.587217 | -1.653651 | 1.046243  |
| C  | -4.784045 | -3.618191 | -0.168056 |
| C  | -5.105318 | -1.290518 | -1.008053 |
| C  | -3.024925 | -2.738053 | 1.970045  |
| C  | -4.585087 | -0.793060 | 1.810970  |
| H  | -2.319851 | -3.385063 | 1.427746  |
| H  | -3.815282 | -3.366242 | 2.408464  |
| H  | -2.476259 | -2.255386 | 2.793143  |
| H  | -4.896621 | 0.081603  | 1.223594  |
| H  | -4.124956 | -0.424666 | 2.740878  |
| H  | -5.483339 | -1.368989 | 2.084395  |
| H  | -4.697636 | -0.271186 | -1.071465 |
| H  | -6.078372 | -1.243298 | -0.496856 |
| H  | -5.273278 | -1.648755 | -2.035153 |
| H  | -5.619281 | -3.590804 | 0.548943  |
| H  | -4.058285 | -4.371165 | 0.167198  |
| H  | -5.182174 | -3.945806 | -1.140798 |
| C  | 2.576304  | -0.863948 | 1.173103  |
| C  | 3.964366  | -0.785931 | 1.148981  |
| C  | 1.838977  | -1.177290 | 0.018221  |
| C  | 4.658946  | -1.020647 | -0.043004 |
| C  | 2.551508  | -1.414218 | -1.171480 |
| C  | 3.936594  | -1.336942 | -1.201451 |
| C  | 0.367855  | -1.202002 | 0.094951  |
| C  | -0.506102 | -1.489873 | -0.887662 |
| H  | 4.480207  | -1.518706 | -2.130716 |
| H  | 2.012855  | -1.653085 | -2.090844 |
| H  | 4.513711  | -0.540285 | 2.058874  |
| H  | 2.043000  | -0.674224 | 2.108456  |
| Cu | -1.796319 | 0.994470  | -0.812580 |
| H  | -0.115471 | -1.766868 | -1.877636 |



|   |           |           |           |
|---|-----------|-----------|-----------|
| H | -2.396983 | -0.277044 | -1.638500 |
| H | -0.044266 | -0.921227 | 1.071979  |
| O | 6.775556  | -1.111542 | -1.147985 |
| H | 8.478234  | 0.245451  | 0.401114  |
| C | 6.144131  | -0.942219 | -0.131672 |
| H | 8.598297  | -1.505835 | 0.749554  |
| C | 8.130273  | -0.561317 | 1.062811  |
| O | 6.713910  | -0.662333 | 1.041591  |
| H | 8.404910  | -0.336133 | 2.099739  |
| H | -3.606500 | 4.477452  | 0.293475  |
| H | 1.717516  | 2.845238  | -1.929186 |
| H | 0.949522  | 5.051360  | -0.620081 |
| H | -1.203185 | 5.712845  | 0.182363  |
| H | -3.504442 | 2.699214  | 0.475438  |
| H | 0.792605  | 1.368713  | -1.518022 |
| C | -1.044777 | 2.695596  | -0.278024 |
| C | -3.057570 | 3.654342  | 0.780425  |
| N | -1.670004 | 3.662711  | 0.397968  |
| C | 1.246712  | 2.280315  | -1.108721 |
| N | 0.223494  | 3.068328  | -0.470274 |
| C | 0.542758  | 4.360376  | 0.134127  |
| C | -0.815648 | 4.812995  | 0.686793  |
| H | -3.164868 | 3.763989  | 1.871638  |
| H | 2.031242  | 1.992653  | -0.389172 |
| H | 1.302938  | 4.233963  | 0.922060  |
| H | -0.792024 | 5.014843  | 1.768712  |

61

Figure 2\_para-CO2Me\_int2 / electronic energy: -2893.96407343 a.u. / lowest freq: 14.84 cm-1

|    |           |           |           |
|----|-----------|-----------|-----------|
| B  | -0.800035 | -1.237700 | -0.828636 |
| O  | -1.193418 | -2.594659 | -1.119670 |
| O  | -1.306884 | -0.958810 | 0.537903  |
| C  | -2.195559 | -2.993483 | -0.206446 |
| C  | -1.840874 | -2.161412 | 1.081525  |
| C  | -2.115240 | -4.503294 | -0.009543 |
| C  | -3.577233 | -2.641065 | -0.774794 |
| C  | -0.743327 | -2.824520 | 1.917013  |
| C  | -3.033312 | -1.825648 | 1.967391  |
| H  | 0.114916  | -3.108294 | 1.290616  |
| H  | -1.108911 | -3.720854 | 2.440220  |
| H  | -0.388415 | -2.108289 | 2.673495  |
| H  | -3.750116 | -1.179364 | 1.442229  |
| H  | -2.695993 | -1.292843 | 2.869494  |
| H  | -3.554307 | -2.739689 | 2.292264  |
| H  | -3.713493 | -1.554015 | -0.896230 |
| H  | -4.393614 | -3.015590 | -0.139529 |
| H  | -3.677951 | -3.097816 | -1.770755 |
| H  | -2.796270 | -4.838331 | 0.788466  |
| H  | -1.094198 | -4.819672 | 0.240969  |
| H  | -2.405744 | -5.016132 | -0.939131 |
| C  | 3.703401  | 0.174172  | 1.001656  |
| C  | 5.062057  | 0.467771  | 0.978336  |
| C  | 3.002086  | -0.151312 | -0.172227 |
| C  | 5.763026  | 0.449001  | -0.232778 |
| C  | 3.719200  | -0.160503 | -1.382752 |
| C  | 5.075085  | 0.134010  | -1.412347 |
| C  | 1.563027  | -0.463991 | -0.082820 |
| C  | 0.759572  | -0.935286 | -1.050755 |
| H  | 5.621136  | 0.125629  | -2.357834 |
| H  | 3.205677  | -0.395833 | -2.317418 |
| H  | 5.584188  | 0.713009  | 1.904196  |
| H  | 3.166186  | 0.191714  | 1.953715  |
| Cu | -2.432308 | 0.478410  | -0.716035 |
| H  | 1.189794  | -1.117871 | -2.046547 |
| H  | -1.411934 | -0.394274 | -1.707596 |
| H  | 1.120987  | -0.298542 | 0.907919  |
| H  | -3.296937 | 1.722112  | 3.060560  |
| H  | -5.433596 | 3.062486  | 2.158864  |
| C  | -2.797321 | 2.046099  | 2.133884  |
| H  | -2.114054 | 1.252499  | 1.802803  |
| H  | -6.586845 | 2.722875  | 0.086832  |
| N  | -3.767713 | 2.295500  | 1.098099  |
| C  | -4.819167 | 3.295033  | 1.276474  |
| H  | -2.213198 | 2.955396  | 2.354842  |
| C  | -3.721381 | 1.798615  | -0.142394 |
| C  | -5.595410 | 3.188665  | -0.041609 |
| H  | -6.058532 | 1.465967  | -2.237112 |
| H  | -4.371049 | 4.291679  | 1.425842  |
| N  | -4.734377 | 2.318510  | -0.840923 |
| C  | -5.080776 | 1.974293  | -2.195159 |
| H  | -5.738083 | 4.160540  | -0.536703 |
| H  | -4.312988 | 1.298897  | -2.595349 |
| H  | -5.130787 | 2.875415  | -2.827165 |
| O  | 7.856421  | 0.762088  | -1.343355 |
| H  | 9.357163  | 2.227558  | 0.294572  |
| C  | 7.218340  | 0.755530  | -0.317089 |
| H  | 9.740861  | 0.494667  | 0.526437  |
| C  | 9.140197  | 1.336196  | 0.901221  |
| O  | 7.755212  | 1.024882  | 0.874333  |
| H  | 9.388845  | 1.532286  | 1.950585  |

61

Figure 2\_para-CO2Me\_ts(C-Brot) / electronic energy: -2893.95849867 a.u. / lowest freq: -111.99 cm-1

|   |          |          |           |
|---|----------|----------|-----------|
| B | 0.695163 | 0.849995 | -0.807648 |
| O | 0.820773 | 2.223504 | -1.221682 |
| O | 1.316310 | 0.801478 | 0.549402  |
| C | 1.848269 | 2.842426 | -0.474734 |
| C | 1.753185 | 2.108153 | 0.913976  |
| C | 1.578294 | 4.341178 | -0.401674 |

|    |           |           |           |
|----|-----------|-----------|-----------|
| C  | 3.198804  | 2.616988  | -1.168959 |
| C  | 0.692961  | 2.723522  | 1.829150  |
| C  | 3.073464  | 2.007109  | 1.668967  |
| H  | -0.250727 | 2.891532  | 1.292091  |
| H  | 1.024414  | 3.682097  | 2.255965  |
| H  | 0.492529  | 2.028042  | 2.657967  |
| H  | 3.809675  | 1.410166  | 1.112971  |
| H  | 2.915544  | 1.522190  | 2.644586  |
| H  | 3.500356  | 3.005134  | 1.853699  |
| H  | 3.478879  | 1.550837  | -1.197556 |
| H  | 4.014784  | 3.166915  | -0.676960 |
| H  | 3.123552  | 2.964864  | -2.210058 |
| H  | 2.280770  | 4.838346  | 0.285336  |
| H  | 0.552977  | 4.546732  | -0.066818 |
| H  | 1.701378  | 4.793456  | -1.397760 |
| C  | -4.160605 | 0.803350  | 0.666786  |
| C  | -5.479741 | 0.366958  | 0.718428  |
| C  | -3.247808 | 0.272397  | -0.260632 |
| C  | -5.927611 | -0.616925 | -0.170172 |
| C  | -3.714539 | -0.711431 | -1.151288 |
| C  | -5.030751 | -1.148860 | -1.106061 |
| C  | -1.856092 | 0.765013  | -0.260718 |
| C  | -0.801261 | 0.244693  | -0.908203 |
| H  | -5.384987 | -1.909358 | -1.804865 |
| H  | -3.038791 | -1.133104 | -1.898337 |
| H  | -6.168494 | 0.790521  | 1.450845  |
| H  | -3.821525 | 1.572471  | 1.365839  |
| Cu | 2.598466  | -0.540098 | -0.612277 |
| H  | -0.973529 | -0.656847 | -1.514049 |
| H  | 1.420068  | 0.054798  | -1.642105 |
| H  | -1.698485 | 1.648293  | 0.370267  |
| H  | 3.704465  | -1.434455 | 3.201095  |
| H  | 6.006796  | -2.426405 | 2.326226  |
| C  | 3.240559  | -1.871495 | 2.302553  |
| H  | 2.450536  | -1.195906 | 1.947847  |
| H  | 7.079958  | -2.062686 | 0.217096  |
| N  | 4.220533  | -2.036038 | 1.258957  |
| C  | 5.432782  | -2.823026 | 1.475479  |
| H  | 2.789080  | -2.838362 | 2.581197  |
| C  | 4.090193  | -1.603736 | 0.000636  |
| C  | 6.164033  | -2.671263 | 0.135455  |
| H  | 6.309800  | -0.943403 | -2.123228 |
| H  | 5.172602  | -3.870750 | 1.699824  |
| N  | 5.172445  | -1.979820 | -0.686563 |
| C  | 5.455792  | -1.638359 | -2.055990 |
| H  | 6.438356  | -3.636442 | -0.315818 |
| H  | 4.570824  | -1.156019 | -2.491581 |
| H  | 5.695696  | -2.540835 | -2.640476 |
| O  | -7.752404 | -1.965462 | -0.918286 |
| H  | -9.521274 | -2.010587 | 1.061466  |
| C  | -7.330475 | -1.118225 | -0.167000 |
| H  | -9.968763 | -0.732323 | -0.107488 |
| C  | -9.443617 | -0.936711 | 0.837029  |
| O  | -8.085674 | -0.528450 | 0.761098  |
| H  | -9.895722 | -0.354138 | 1.647868  |

61

Figure 2\_para-CO2Me\_int3 / electronic energy: -2893.96339570 a.u. / lowest freq: 19.10 cm<sup>-1</sup>

|    |           |           |           |
|----|-----------|-----------|-----------|
| B  | 0.606257  | 0.579371  | -0.456726 |
| O  | 0.589795  | 1.885282  | -1.066489 |
| O  | 1.423539  | 0.736713  | 0.788284  |
| C  | 1.562819  | 2.709479  | -0.461070 |
| C  | 1.655680  | 2.126288  | 0.996930  |
| C  | 1.095449  | 4.159452  | -0.518036 |
| C  | 2.883784  | 2.580411  | -1.231115 |
| C  | 0.542226  | 2.652962  | 1.905367  |
| C  | 3.007107  | 2.314952  | 1.672448  |
| H  | -0.440661 | 2.554809  | 1.422132  |
| H  | 0.697378  | 3.706778  | 2.180794  |
| H  | 0.523988  | 2.055968  | 2.829721  |
| H  | 3.806837  | 1.798259  | 1.123927  |
| H  | 2.978731  | 1.903415  | 2.693119  |
| H  | 3.265052  | 3.382729  | 1.746987  |
| H  | 3.299348  | 1.560117  | -1.168716 |
| H  | 3.649416  | 3.281991  | -0.867784 |
| H  | 2.695120  | 2.793232  | -2.293871 |
| H  | 1.769903  | 4.818408  | 0.050745  |
| H  | 0.078696  | 4.268024  | -0.117178 |
| H  | 1.083271  | 4.506954  | -1.562428 |
| C  | -4.442666 | 0.984590  | -0.541680 |
| C  | -5.763024 | 0.583645  | -0.371788 |
| C  | -3.375570 | 0.084648  | -0.376517 |
| C  | -6.054909 | -0.743290 | -0.036161 |
| C  | -3.685239 | -1.247684 | -0.047598 |
| C  | -5.001617 | -1.654047 | 0.120564  |
| C  | -1.994032 | 0.572408  | -0.552218 |
| C  | -0.851868 | -0.058554 | -0.233862 |
| H  | -5.231974 | -2.691249 | 0.371787  |
| H  | -2.883222 | -1.979897 | 0.068440  |
| H  | -6.573051 | 1.302866  | -0.500923 |
| H  | -4.225945 | 2.023640  | -0.803669 |
| Cu | 2.679320  | -0.566109 | -0.363828 |
| H  | -0.916088 | -1.062140 | 0.212920  |
| H  | 1.237778  | -0.314134 | -1.243042 |
| H  | -1.914016 | 1.581238  | -0.976983 |
| H  | 4.854478  | -0.884821 | 3.027229  |
| H  | 6.944531  | -1.767103 | 1.618464  |
| C  | 4.241758  | -1.530081 | 2.376510  |

|   |            |           |           |
|---|------------|-----------|-----------|
| H | 3.273696   | -1.041610 | 2.204469  |
| H | 7.380074   | -1.718215 | -0.731752 |
| N | 4.892775   | -1.741318 | 1.109476  |
| C | 6.217380   | -2.354630 | 1.036426  |
| H | 4.073382   | -2.487244 | 2.896970  |
| C | 4.389770   | -1.420941 | -0.086549 |
| C | 6.507034   | -2.337704 | -0.470914 |
| H | 5.889057   | -0.858240 | -2.827035 |
| H | 6.192117   | -3.372790 | 1.456024  |
| N | 5.285588   | -1.752517 | -1.020590 |
| C | 5.131936   | -1.559524 | -2.438840 |
| H | 6.670596   | -3.344154 | -0.886855 |
| H | 4.132622   | -1.148388 | -2.633704 |
| H | 5.236423   | -2.516182 | -2.975968 |
| O | -7.739513  | -2.373300 | 0.427582  |
| H | -9.906852  | -1.051619 | 1.146173  |
| C | -7.449143  | -1.232527 | 0.153905  |
| H | -10.016034 | -1.383155 | -0.609099 |
| C | -9.721049  | -0.638201 | 0.144257  |
| O | -8.358317  | -0.269940 | -0.010021 |
| H | -10.303725 | 0.279742  | 0.006340  |

42

Figure 2\_para-CO2Me-alkenylBpin / electronic energy: -947.261050912 a.u. / lowest freq: 13.61 cm-1

|   |           |           |           |
|---|-----------|-----------|-----------|
| B | 2.536731  | -0.351136 | -0.017816 |
| O | 3.507318  | -1.307017 | 0.091467  |
| O | 3.044449  | 0.917279  | -0.089343 |
| C | 4.760349  | -0.629615 | 0.319214  |
| C | 4.471353  | 0.802509  | -0.264709 |
| C | 5.875327  | -1.387204 | -0.382583 |
| C | 4.996326  | -0.622611 | 1.828498  |
| C | 4.745855  | 0.900135  | -1.764214 |
| C | 5.160646  | 1.939871  | 0.470457  |
| H | 4.269808  | 0.075213  | -2.315220 |
| H | 5.823957  | 0.886700  | -1.979228 |
| H | 4.330817  | 1.845090  | -2.144324 |
| H | 4.841247  | 2.001481  | 1.518889  |
| H | 4.920642  | 2.897749  | -0.014329 |
| H | 6.253003  | 1.810310  | 0.441985  |
| H | 4.207048  | -0.068094 | 2.357891  |
| H | 5.967553  | -0.174767 | 2.082696  |
| H | 4.987792  | -1.658529 | 2.197849  |
| H | 6.823693  | -0.833725 | -0.309558 |
| H | 5.649454  | -1.557045 | -1.443307 |
| H | 6.018218  | -2.368010 | 0.094703  |
| C | -2.207218 | 1.219150  | 0.141935  |
| C | -3.592625 | 1.099338  | 0.165560  |
| C | -1.385376 | 0.103371  | -0.083437 |
| C | -4.189417 | -0.146927 | -0.050480 |
| C | -1.997705 | -1.142169 | -0.304573 |
| C | -3.380002 | -1.264785 | -0.289389 |
| C | 0.078353  | 0.284197  | -0.078553 |
| C | 1.016202  | -0.679307 | -0.047860 |
| H | -3.852270 | -2.233203 | -0.464204 |
| H | -1.388084 | -2.026100 | -0.502335 |
| H | -4.214799 | 1.975709  | 0.350685  |
| H | -1.746933 | 2.196518  | 0.307586  |
| H | 0.706356  | -1.730832 | -0.015627 |
| H | 0.406700  | 1.330741  | -0.083277 |
| O | -6.220518 | -1.390859 | -0.242301 |
| H | -8.075832 | 0.017569  | 1.049167  |
| C | -5.670406 | -0.334915 | -0.040108 |
| H | -8.154100 | 0.388896  | -0.700309 |
| C | -7.745844 | 0.716413  | 0.266859  |
| O | -6.327659 | 0.794119  | 0.220526  |
| H | -8.101542 | 1.727137  | 0.496846  |

61

Figure 2\_para-CO2Me\_pc2\_rev / electronic energy: -2893.97226879 a.u. / lowest freq: 18.35 cm-1

|   |           |           |           |
|---|-----------|-----------|-----------|
| B | -1.659253 | 1.162062  | 0.484585  |
| O | -2.509790 | 1.042718  | 1.552884  |
| O | -2.239202 | 1.798463  | -0.582136 |
| C | -3.820265 | 1.458269  | 1.125246  |
| C | -3.495840 | 2.342385  | -0.139420 |
| C | -4.503028 | 2.203627  | 2.261068  |
| C | -4.602514 | 0.192095  | 0.783268  |
| C | -3.250429 | 3.810810  | 0.202028  |
| C | -4.509522 | 2.229678  | -1.266395 |
| H | -2.518862 | 3.918286  | 1.016777  |
| H | -4.179210 | 4.320309  | 0.496135  |
| H | -2.845315 | 4.319658  | -0.684912 |
| H | -4.580412 | 1.202435  | -1.647273 |
| H | -4.210192 | 2.879668  | -2.101930 |
| H | -5.505710 | 2.550840  | -0.926508 |
| H | -4.125519 | -0.351758 | -0.042562 |
| H | -5.642436 | 0.417927  | 0.507382  |
| H | -4.615431 | -0.468464 | 1.663109  |
| H | -5.468663 | 2.613648  | 1.928626  |
| H | -3.883583 | 3.027350  | 2.638728  |
| H | -4.696127 | 1.513607  | 3.095957  |
| C | 3.066452  | 1.461738  | -1.209555 |
| C | 4.444828  | 1.331850  | -1.101477 |
| C | 2.203216  | 0.784784  | -0.333000 |
| C | 5.003354  | 0.515149  | -0.111980 |
| C | 2.774726  | -0.034125 | 0.655606  |
| C | 4.152467  | -0.170103 | 0.765041  |
| C | 0.741292  | 0.970265  | -0.471868 |
| C | -0.201354 | 0.647250  | 0.506927  |
| H | 4.574757  | -0.814230 | 1.537332  |

|    |           |           |           |
|----|-----------|-----------|-----------|
| H  | 2.134128  | -0.582818 | 1.349252  |
| H  | 5.106773  | 1.866841  | -1.785117 |
| H  | 2.643008  | 2.101472  | -1.987742 |
| Cu | -0.195811 | -0.793168 | -0.967456 |
| H  | 0.144296  | 0.174336  | 1.433699  |
| H  | 0.539387  | -1.164110 | -2.337883 |
| H  | 0.445055  | 1.660332  | -1.269751 |
| O  | 7.251426  | 1.002240  | -0.757667 |
| H  | 8.768883  | 0.413396  | 1.365471  |
| C  | 6.487431  | 0.414668  | -0.028811 |
| O  | 6.894624  | -0.397516 | 0.948344  |
| C  | 8.297062  | -0.547405 | 1.112473  |
| H  | 8.436219  | -1.257154 | 1.936048  |
| H  | 8.761756  | -0.942649 | 0.197563  |
| H  | -4.657909 | -2.839906 | -0.224696 |
| H  | -4.138561 | -1.140016 | -2.234849 |
| H  | -3.382780 | -3.135044 | 1.781392  |
| C  | -3.645092 | -3.230818 | -0.405515 |
| C  | -3.155610 | -1.634292 | -2.296012 |
| H  | -0.867667 | -2.389324 | 2.587248  |
| N  | -2.799774 | -2.212549 | -1.026148 |
| C  | -2.881982 | -3.541341 | 0.886393  |
| H  | -2.399141 | -0.891874 | -2.578608 |
| C  | -1.625095 | -2.056706 | -0.405871 |
| N  | -1.613193 | -2.848410 | 0.668694  |
| H  | -3.729786 | -4.107707 | -1.069314 |
| H  | -3.204893 | -2.406894 | -3.081766 |
| C  | -0.565139 | -2.894712 | 1.654178  |
| H  | -2.721228 | -4.617827 | 1.044552  |
| H  | 0.327731  | -2.398587 | 1.252740  |
| H  | -0.309236 | -3.939096 | 1.891030  |

61

Figure 2\_para-CO2Me ts (CuHadd\_rev) / electronic energy: -2893.95003715 a.u. / lowest freq: -793.39 cm-1

|    |           |           |           |
|----|-----------|-----------|-----------|
| B  | 1.480275  | -1.449560 | 0.479173  |
| O  | 2.251616  | -1.666607 | 1.611741  |
| O  | 2.173298  | -1.822428 | -0.671263 |
| C  | 3.589030  | -1.939954 | 1.182059  |
| C  | 3.359733  | -2.513408 | -0.262316 |
| C  | 4.240888  | -2.911589 | 2.153622  |
| C  | 4.350253  | -0.612866 | 1.175304  |
| C  | 3.040847  | -4.009082 | -0.260920 |
| C  | 4.482173  | -2.224614 | -1.246615 |
| H  | 2.253627  | -4.249559 | 0.469138  |
| H  | 3.928093  | -4.617425 | -0.031419 |
| H  | 2.675916  | -4.296202 | -1.258296 |
| H  | 4.639616  | -1.147132 | -1.380289 |
| H  | 4.238627  | -2.655804 | -2.229241 |
| H  | 5.425267  | -2.676454 | -0.902958 |
| H  | 3.909358  | 0.098681  | 0.461114  |
| H  | 5.412940  | -0.750228 | 0.927343  |
| H  | 4.287509  | -0.161424 | 2.176747  |
| H  | 5.235304  | -3.216905 | 1.793176  |
| H  | 3.628985  | -3.811858 | 2.297137  |
| H  | 4.368748  | -2.430665 | 3.135107  |
| C  | -3.070448 | -1.461207 | -1.275910 |
| C  | -4.451014 | -1.396486 | -1.112283 |
| C  | -2.222592 | -0.622271 | -0.543210 |
| C  | -5.014398 | -0.489585 | -0.209685 |
| C  | -2.796176 | 0.290650  | 0.353803  |
| C  | -4.172540 | 0.357581  | 0.524153  |
| C  | -0.737986 | -0.727985 | -0.697301 |
| C  | 0.072341  | -0.889565 | 0.494432  |
| H  | -4.601214 | 1.073349  | 1.226780  |
| H  | -2.149427 | 0.963353  | 0.922767  |
| H  | -5.107962 | -2.053307 | -1.685765 |
| H  | -2.642297 | -2.176815 | -1.982338 |
| Cu | 0.498897  | 0.874712  | -0.492452 |
| H  | -0.389535 | -0.635141 | 1.455896  |
| H  | -0.611098 | 0.666309  | -1.615603 |
| H  | -0.444520 | -1.345741 | -1.553463 |
| O  | -7.257307 | -1.164004 | -0.687483 |
| H  | -8.716022 | -0.434289 | 1.415169  |
| C  | -6.497570 | -0.461391 | -0.063788 |
| O  | -6.906995 | 0.428306  | 0.841928  |
| C  | -8.306465 | 0.523511  | 1.062183  |
| H  | -8.444475 | 1.291763  | 1.831821  |
| H  | -8.831547 | 0.819822  | 0.142401  |
| H  | 4.741558  | 3.391654  | -0.428007 |
| H  | 4.440754  | 1.227258  | -1.887770 |
| H  | 3.426163  | 4.059368  | 1.468939  |
| C  | 3.685317  | 3.582787  | -0.665965 |
| C  | 3.362541  | 1.435716  | -1.960333 |
| H  | 1.034714  | 3.506196  | 2.495925  |
| N  | 2.965805  | 2.334837  | -0.906721 |
| C  | 2.901791  | 4.181150  | 0.505165  |
| H  | 2.814434  | 0.489213  | -1.853714 |
| C  | 1.781900  | 2.292632  | -0.280427 |
| N  | 1.682966  | 3.374534  | 0.499183  |
| H  | 3.646701  | 4.221703  | -1.565486 |
| H  | 3.159502  | 1.864067  | -2.957504 |
| C  | 0.642655  | 3.597242  | 1.468574  |
| H  | 2.674256  | 5.248453  | 0.371478  |
| H  | -0.143317 | 2.844010  | 1.326174  |
| H  | 0.201969  | 4.599573  | 1.350142  |

61

Figure 2\_para-CO2Me L-Cu-alkyl\_rev / electronic energy: -2894.00374351 a.u. / lowest freq: 15.88 cm-1

|   |          |           |          |
|---|----------|-----------|----------|
| B | 2.552577 | -1.265434 | 0.260816 |
|---|----------|-----------|----------|

|    |           |           |           |
|----|-----------|-----------|-----------|
| O  | 3.508027  | -1.103519 | 1.267350  |
| O  | 3.074147  | -0.827731 | -0.963940 |
| C  | 4.538837  | -0.255110 | 0.764043  |
| C  | 4.456296  | -0.519217 | -0.783945 |
| C  | 5.865631  | -0.636413 | 1.403619  |
| C  | 4.172619  | 1.183349  | 1.138576  |
| C  | 5.266286  | -1.742264 | -1.218493 |
| C  | 4.823724  | 0.678033  | -1.649217 |
| H  | 5.031960  | -2.618108 | -0.594832 |
| H  | 6.349735  | -1.558397 | -1.169990 |
| H  | 5.007731  | -1.989911 | -2.259012 |
| H  | 4.174261  | 1.539989  | -1.446539 |
| H  | 4.716956  | 0.418014  | -2.713286 |
| H  | 5.868370  | 0.979743  | -1.476661 |
| H  | 3.209860  | 1.471152  | 0.690384  |
| H  | 4.939560  | 1.906253  | 0.824075  |
| H  | 4.063340  | 1.250216  | 2.231459  |
| H  | 6.695246  | -0.064410 | 0.960345  |
| H  | 6.076074  | -1.707477 | 1.285237  |
| H  | 5.838749  | -0.416036 | 2.481534  |
| C  | -1.931982 | -2.876757 | 0.331166  |
| C  | -3.262805 | -2.510275 | 0.500956  |
| C  | -1.107268 | -2.203976 | -0.581027 |
| C  | -3.806265 | -1.455989 | -0.242204 |
| C  | -1.676919 | -1.180099 | -1.353362 |
| C  | -3.003348 | -0.800658 | -1.184788 |
| C  | 0.375989  | -2.488641 | -0.638320 |
| C  | 1.138019  | -1.761966 | 0.480048  |
| H  | -3.420649 | 0.012997  | -1.779789 |
| H  | -1.055708 | -0.654404 | -2.083831 |
| H  | -3.895538 | -3.030906 | 1.222756  |
| H  | -1.513725 | -3.687466 | 0.934190  |
| Cu | 0.446123  | 0.114829  | 0.538964  |
| H  | 0.971868  | -2.225165 | 1.468025  |
| H  | 0.761982  | -2.169011 | -1.619616 |
| H  | 0.528219  | -3.583447 | -0.584863 |
| O  | -5.975194 | -1.657405 | 0.743099  |
| H  | -7.120374 | 0.699368  | 0.579299  |
| C  | -5.219157 | -1.063410 | 0.011231  |
| O  | -5.571963 | 0.042414  | -0.651576 |
| C  | -6.907635 | 0.492098  | -0.479495 |
| H  | -6.999461 | 1.414621  | -1.064291 |
| H  | -7.626043 | -0.255144 | -0.847450 |
| H  | -0.116169 | 4.902683  | -0.102661 |
| H  | 2.127595  | 3.487775  | -0.898930 |
| H  | -2.049932 | 4.327127  | 1.175762  |
| C  | -0.666279 | 4.045369  | -0.523291 |
| C  | 1.383379  | 2.752633  | -1.248400 |
| H  | -2.562114 | 2.033931  | 2.603738  |
| N  | 0.162856  | 2.842080  | -0.488870 |
| C  | -1.872381 | 3.638671  | 0.335504  |
| H  | 1.797491  | 1.740814  | -1.137998 |
| C  | -0.323557 | 1.886654  | 0.308806  |
| N  | -1.480796 | 2.316661  | 0.820121  |
| H  | -0.941197 | 4.295598  | -1.559550 |
| H  | 1.188761  | 2.939408  | -2.317001 |
| C  | -2.369050 | 1.534332  | 1.640563  |
| H  | -2.806227 | 3.567007  | -0.246266 |
| H  | -1.906788 | 0.556629  | 1.831324  |
| H  | -3.333622 | 1.374251  | 1.130351  |

82

Figure 2 para-CO2Me\_pc3\_01 / electronic energy: -3732.83783511 a.u. / lowest freq: 8.90 cm-1

|   |          |           |           |
|---|----------|-----------|-----------|
| C | 1.616236 | 0.675759  | -0.583120 |
| C | 1.650896 | 1.007316  | 0.765651  |
| C | 1.140483 | 2.323148  | 1.274792  |
| O | 2.184445 | 3.324007  | 1.285906  |
| P | 2.567211 | 4.077700  | -0.071111 |
| O | 1.464357 | 4.388788  | -1.003399 |
| O | 3.347398 | 5.317053  | 0.581801  |
| O | 3.701508 | 3.205463  | -0.798950 |
| C | 3.861312 | 6.336558  | -0.268418 |
| H | 2.264907 | -0.099366 | -1.000633 |
| H | 1.175736 | 1.367610  | -1.309876 |
| H | 2.341716 | 0.481144  | 1.435212  |
| H | 0.306326 | 2.694167  | 0.659263  |
| H | 0.804878 | 2.255078  | 2.317099  |
| B | 1.150180 | -3.081908 | -0.906914 |
| O | 1.777817 | -3.793762 | 0.086062  |
| O | 2.044044 | -2.592041 | -1.824468 |
| C | 3.198356 | -3.607754 | -0.052217 |
| C | 3.331747 | -3.176602 | -1.560362 |
| C | 3.910496 | -4.901842 | 0.306478  |
| C | 3.597697 | -2.501321 | 0.922137  |
| C | 3.490700 | -4.361635 | -2.511443 |
| C | 4.416238 | -2.145422 | -1.831069 |
| H | 2.717136 | -5.124940 | -2.339085 |
| H | 4.477478 | -4.835437 | -2.407871 |
| H | 3.386938 | -4.004821 | -3.546649 |
| H | 4.256981 | -1.217693 | -1.266120 |
| H | 4.426747 | -1.890881 | -2.901183 |
| H | 5.405977 | -2.548584 | -1.568592 |
| H | 3.084579 | -1.558459 | 0.683863  |
| H | 4.682081 | -2.320640 | 0.911776  |
| H | 3.310160 | -2.795384 | 1.942563  |
| H | 4.992039 | -4.812371 | 0.124830  |
| H | 3.526430 | -5.752187 | -0.271707 |
| H | 3.762345 | -5.122878 | 1.373854  |

|    |           |           |           |
|----|-----------|-----------|-----------|
| C  | -2.513980 | 0.239748  | -1.911709 |
| C  | -3.810563 | 0.716391  | -1.860664 |
| C  | -2.111243 | -0.941205 | -1.227694 |
| C  | -4.798914 | 0.035882  | -1.124337 |
| C  | -3.131816 | -1.625865 | -0.515669 |
| C  | -4.430322 | -1.145222 | -0.461724 |
| C  | -0.717759 | -1.361071 | -1.231182 |
| C  | -0.397195 | -2.833439 | -0.960554 |
| H  | -5.193426 | -1.687976 | 0.101944  |
| H  | -2.887575 | -2.546223 | 0.018965  |
| H  | -4.074180 | 1.631140  | -2.395302 |
| H  | -1.763373 | 0.791661  | -2.486052 |
| Cu | 0.096887  | -0.280062 | 0.333497  |
| H  | -0.839879 | -3.500966 | -1.732920 |
| H  | -0.824673 | -3.174530 | -0.002851 |
| H  | -0.202801 | -1.001671 | -2.134052 |
| H  | 4.356896  | 7.073420  | 0.375585  |
| H  | 3.049896  | 6.829050  | -0.825270 |
| H  | 4.596539  | 5.931569  | -0.981871 |
| C  | 4.797686  | 2.651846  | -0.085864 |
| H  | 5.534111  | 2.320056  | -0.828665 |
| H  | 4.476635  | 1.786644  | 0.514218  |
| H  | 5.265814  | 3.397107  | 0.576178  |
| H  | 0.546289  | -2.652381 | 3.703952  |
| H  | -1.749183 | -1.660868 | 4.669193  |
| C  | -0.007407 | -2.739678 | 2.752619  |
| H  | 0.691112  | -2.605308 | 1.918584  |
| H  | -0.421875 | -3.757731 | 2.687497  |
| C  | -2.151495 | -1.770851 | 3.647440  |
| N  | -1.059273 | -1.760021 | 2.675627  |
| H  | -2.707537 | -2.718746 | 3.600855  |
| H  | -3.233784 | 0.114698  | 4.042310  |
| C  | -1.038265 | -0.653869 | 1.923174  |
| C  | -2.985280 | -0.562430 | 3.211852  |
| N  | -2.100426 | 0.088886  | 2.249253  |
| H  | -3.926281 | -0.852794 | 2.714257  |
| H  | -2.614194 | 2.123852  | 2.314874  |
| C  | -2.505249 | 1.302174  | 1.588590  |
| H  | -1.744613 | 1.580636  | 0.848340  |
| H  | -3.467037 | 1.163846  | 1.067699  |
| O  | -7.064851 | -0.040975 | -0.378872 |
| H  | -7.996402 | 2.422715  | -0.571744 |
| C  | -6.190727 | 0.513320  | -1.009892 |
| H  | -8.456878 | 1.500366  | -2.033100 |
| C  | -7.715515 | 2.195313  | -1.611005 |
| O  | -6.407646 | 1.654667  | -1.680505 |
| H  | -7.700247 | 3.120768  | -2.199155 |

82

Figure 2\_para-CO2Me\_pc3\_02 / electronic energy: -3732.83759747 a.u. / lowest freq: 15.28 cm-1

|    |           |           |           |
|----|-----------|-----------|-----------|
| C  | 0.533956  | -1.103606 | -1.001249 |
| C  | 0.511174  | -1.851190 | 0.166823  |
| C  | 1.673004  | -1.940238 | 1.109905  |
| O  | 2.572659  | -3.005029 | 0.718190  |
| F  | 4.050461  | -2.630076 | 0.242047  |
| O  | 4.834880  | -1.727410 | 1.108883  |
| O  | 4.602597  | -4.118184 | 0.036940  |
| O  | 3.910470  | -2.006594 | -1.233906 |
| C  | 5.988509  | -4.309984 | -0.231924 |
| H  | -0.175068 | -1.317495 | -1.807470 |
| H  | 1.406726  | -0.499874 | -1.274194 |
| H  | -0.241687 | -2.641234 | 0.273436  |
| H  | 2.227421  | -0.991516 | 1.157747  |
| H  | 1.339122  | -2.185004 | 2.127159  |
| B  | 0.968737  | 2.406241  | -1.542108 |
| O  | 2.137880  | 1.794095  | -1.919203 |
| O  | 1.194519  | 3.463542  | -0.695988 |
| C  | 3.201463  | 2.327830  | -1.106089 |
| C  | 2.611578  | 3.716056  | -0.665761 |
| C  | 4.472553  | 2.402647  | -1.935443 |
| C  | 3.393634  | 1.364569  | 0.062131  |
| C  | 2.891166  | 4.829853  | -1.673329 |
| C  | 3.010154  | 4.162271  | 0.731382  |
| H  | 2.619808  | 4.526450  | -2.695648 |
| H  | 3.950463  | 5.124602  | -1.667145 |
| H  | 2.877761  | 5.711484  | -1.411116 |
| H  | 2.694544  | 3.441247  | 1.495817  |
| H  | 2.538411  | 5.129408  | 0.960164  |
| H  | 4.100740  | 4.290865  | 0.801452  |
| H  | 2.473600  | 1.282846  | 0.662295  |
| H  | 4.213316  | 1.678509  | 0.723563  |
| H  | 3.641810  | 0.368472  | -0.327815 |
| H  | 5.277754  | 2.894584  | -1.369126 |
| H  | 4.315974  | 2.951628  | -2.873256 |
| H  | 4.807833  | 1.385757  | -2.187569 |
| C  | -3.555527 | 1.135891  | 0.169472  |
| C  | -4.795129 | 0.531316  | 0.096882  |
| C  | -2.574921 | 0.972611  | -0.850872 |
| C  | -5.146614 | -0.274588 | -1.001979 |
| C  | -2.962331 | 0.179759  | -1.964003 |
| C  | -4.205127 | -0.431753 | -2.031809 |
| C  | -1.244515 | 1.546341  | -0.705458 |
| C  | -0.460999 | 1.927508  | -1.965240 |
| H  | -4.461040 | -1.038501 | -2.902909 |
| H  | -2.259593 | 0.037593  | -2.788149 |
| H  | -5.528086 | 0.677515  | 0.894136  |
| H  | -3.308061 | 1.758308  | 1.034610  |
| Cu | -0.463712 | -0.030513 | 0.390546  |

|   |           |           |           |
|---|-----------|-----------|-----------|
| H | -0.977743 | 2.724428  | -2.541072 |
| H | -0.348410 | 1.074850  | -2.653811 |
| H | -1.259634 | 2.378131  | 0.015774  |
| H | 6.133837  | -5.380366 | -0.422236 |
| H | 6.601431  | -4.007399 | 0.630245  |
| H | 6.308370  | -3.742394 | -1.120218 |
| C | 3.265282  | -2.714200 | -2.286425 |
| H | 2.992889  | -1.978689 | -3.053392 |
| H | 2.353428  | -3.217191 | -1.931987 |
| H | 3.947039  | -3.458846 | -2.725134 |
| H | -2.668211 | -2.421937 | 3.093035  |
| H | -2.487762 | -0.486276 | 4.972368  |
| C | -2.725874 | -1.580303 | 2.383913  |
| H | -2.266093 | -1.880505 | 1.433930  |
| H | -3.789067 | -1.352369 | 2.200795  |
| C | -2.478164 | 0.221981  | 4.130846  |
| N | -2.030757 | -0.430731 | 2.901540  |
| H | -3.502723 | 0.609335  | 3.997871  |
| H | -0.733034 | 1.143282  | 5.116854  |
| C | -1.077361 | 0.253589  | 2.262470  |
| C | -1.444837 | 1.341672  | 4.297705  |
| N | -0.752361 | 1.313169  | 3.010667  |
| H | -1.902638 | 2.326041  | 4.474354  |
| H | 1.171913  | 2.110910  | 3.351932  |
| C | 0.290618  | 2.257934  | 2.704059  |
| H | 0.591625  | 2.136727  | 1.655276  |
| H | -0.072352 | 3.288685  | 2.839076  |
| O | -7.332406 | -0.759676 | -0.176394 |
| H | -8.761474 | -1.493348 | -2.290899 |
| C | -6.485541 | -0.894824 | -1.033000 |
| H | -8.165314 | -2.937685 | -1.422518 |
| C | -7.963221 | -2.249585 | -2.256919 |
| O | -6.689552 | -1.642427 | -2.127821 |
| H | -7.944925 | -2.809157 | -3.199818 |

82

Figure 2\_para-CO2Me\_ts(AS)\_01 / electronic energy: -3732.80314503 a.u. / lowest freq: -348.41 cm<sup>-1</sup>

|    |           |           |           |
|----|-----------|-----------|-----------|
| C  | 1.313085  | 1.217578  | -0.643736 |
| C  | 1.615832  | 1.544177  | 0.701738  |
| C  | 0.638268  | 2.045441  | 1.570881  |
| O  | 0.701047  | 4.121974  | 1.516405  |
| P  | 0.029009  | 4.576391  | 0.221132  |
| O  | -0.992253 | 3.709998  | -0.446854 |
| O  | -0.555014 | 6.061858  | 0.570167  |
| O  | 1.185407  | 4.909425  | -0.889543 |
| C  | -1.267010 | 6.761411  | -0.426132 |
| H  | 2.102758  | 0.859836  | -1.308221 |
| H  | 0.457047  | 1.713316  | -1.116833 |
| H  | 2.621213  | 1.369658  | 1.097675  |
| H  | -0.396829 | 2.129490  | 1.238029  |
| H  | 0.825515  | 2.078570  | 2.643484  |
| B  | 2.454014  | -2.331462 | -0.968762 |
| O  | 3.371989  | -2.951954 | -0.162523 |
| O  | 3.036098  | -1.414339 | -1.803492 |
| C  | 4.625317  | -2.252597 | -0.298848 |
| C  | 4.465762  | -1.559901 | -1.701717 |
| C  | 5.768832  | -3.248391 | -0.203836 |
| C  | 4.697896  | -1.252036 | 0.852959  |
| C  | 4.907683  | -2.448356 | -2.862812 |
| C  | 5.115180  | -0.190105 | -1.811824 |
| H  | 4.455199  | -3.449231 | -2.797770 |
| H  | 6.000889  | -2.560253 | -2.895083 |
| H  | 4.580804  | -1.989971 | -3.807509 |
| H  | 4.704854  | 0.519776  | -1.081511 |
| H  | 4.947396  | 0.223825  | -2.817032 |
| H  | 6.201473  | -0.265077 | -1.652807 |
| H  | 3.877674  | -0.520376 | 0.797384  |
| H  | 5.651436  | -0.704995 | 0.858155  |
| H  | 4.608238  | -1.792069 | 1.806991  |
| H  | 6.732371  | -2.749185 | -0.385781 |
| H  | 5.656693  | -4.067597 | -0.925693 |
| H  | 5.799245  | -3.685966 | 0.804848  |
| C  | -2.201270 | -0.545414 | -1.788754 |
| C  | -3.584582 | -0.632220 | -1.790531 |
| C  | -1.395619 | -1.506418 | -1.137611 |
| C  | -4.231047 | -1.693582 | -1.137826 |
| C  | -2.062796 | -2.568321 | -0.490874 |
| C  | -3.448121 | -2.657980 | -0.490331 |
| C  | 0.073787  | -1.358362 | -1.129307 |
| C  | 0.911961  | -2.619419 | -0.928209 |
| H  | -3.945828 | -3.488946 | 0.014754  |
| H  | -1.483382 | -3.335709 | 0.026276  |
| H  | -4.175432 | 0.127944  | -2.303956 |
| H  | -1.716508 | 0.291762  | -2.299382 |
| Cu | 0.446289  | -0.171597 | 0.468113  |
| H  | 0.689314  | -3.362479 | -1.723832 |
| H  | 0.676899  | -3.130960 | 0.018841  |
| H  | 0.395212  | -0.826237 | -2.033465 |
| H  | -1.615710 | 7.708032  | 0.010870  |
| H  | -2.140504 | 6.187447  | -0.776646 |
| H  | -0.629892 | 6.991251  | -1.297906 |
| C  | 2.326653  | 5.637300  | -0.500913 |
| H  | 3.025305  | 5.654627  | -1.349954 |
| H  | 2.827384  | 5.170365  | 0.363012  |
| H  | 2.076536  | 6.679006  | -0.233349 |
| H  | 2.019455  | -2.274412 | 3.626202  |
| H  | -0.428048 | -2.449384 | 4.712731  |
| C  | 1.512385  | -2.538761 | 2.682650  |

|   |           |           |           |
|---|-----------|-----------|-----------|
| H | 2.029461  | -2.046387 | 1.851287  |
| H | 1.589899  | -3.627167 | 2.538963  |
| C | -0.798995 | -2.655144 | 3.695126  |
| N | 0.134649  | -2.121460 | 2.703565  |
| H | -0.901968 | -3.744587 | 3.583671  |
| H | -2.527785 | -1.391592 | 4.245347  |
| C | -0.379004 | -1.110456 | 2.000347  |
| C | -2.092201 | -1.896628 | 3.370509  |
| N | -1.642297 | -0.923893 | 2.377684  |
| H | -2.866777 | -2.546567 | 2.930723  |
| H | -2.846131 | 0.789994  | 2.575164  |
| C | -2.550757 | 0.043922  | 1.819987  |
| H | -2.063166 | 0.557524  | 0.982273  |
| H | -3.458487 | -0.451537 | 1.441343  |
| O | -6.300816 | -2.721435 | -0.532838 |
| H | -8.172107 | -0.826018 | -0.790394 |
| C | -5.708246 | -1.833652 | -1.102971 |
| H | -8.107410 | -1.847505 | -2.258735 |
| C | -7.751612 | -0.911683 | -1.803318 |
| O | -6.334250 | -0.862666 | -1.774709 |
| H | -8.076292 | -0.058299 | -2.410158 |

82

Figure 2\_para-CO2Me\_ts(AS)\_02 / electronic energy: -3732.80085269 a.u. / lowest freq: -311.21 cm<sup>-1</sup>

|    |           |           |           |
|----|-----------|-----------|-----------|
| C  | 0.260663  | -0.186102 | -1.846888 |
| C  | 0.361464  | -1.537649 | -1.445495 |
| C  | 1.210878  | -1.952486 | -0.409594 |
| O  | 2.933982  | -2.760088 | -1.264133 |
| P  | 4.200118  | -2.235803 | -0.592380 |
| O  | 4.127289  | -1.530259 | 0.723469  |
| O  | 5.200353  | -3.529342 | -0.536982 |
| O  | 4.985715  | -1.250573 | -1.642189 |
| C  | 6.465383  | -3.375937 | 0.066462  |
| H  | -0.424232 | 0.076396  | -2.657361 |
| H  | 1.097729  | 0.504453  | -1.699838 |
| H  | -0.320295 | -2.277323 | -1.877255 |
| H  | 1.843655  | -1.248563 | 0.134962  |
| H  | 1.045279  | -2.917892 | 0.065412  |
| B  | 0.636305  | 2.927968  | -0.477912 |
| O  | 1.719257  | 2.823393  | -1.309706 |
| O  | 0.994352  | 3.285494  | 0.796629  |
| C  | 2.910178  | 2.899028  | -0.493881 |
| C  | 2.385960  | 3.663995  | 0.774658  |
| C  | 4.002712  | 3.617361  | -1.266398 |
| C  | 3.331424  | 1.466775  | -0.184957 |
| C  | 2.433923  | 5.183016  | 0.619940  |
| C  | 3.040600  | 3.250771  | 2.082288  |
| H  | 1.971772  | 5.506780  | -0.324730 |
| H  | 3.466060  | 5.560202  | 0.650470  |
| H  | 1.875262  | 5.646432  | 1.446428  |
| H  | 2.911791  | 2.180900  | 2.287091  |
| H  | 2.596705  | 3.814761  | 2.916018  |
| H  | 4.118673  | 3.470004  | 2.058157  |
| H  | 2.555590  | 0.933632  | 0.383020  |
| H  | 4.260455  | 1.422601  | 0.397961  |
| H  | 3.509476  | 0.915257  | -1.118385 |
| H  | 4.885155  | 3.773006  | -0.627869 |
| H  | 3.665247  | 4.591258  | -1.644929 |
| H  | 4.311881  | 3.006298  | -2.127334 |
| C  | -3.644298 | 0.742723  | 0.862088  |
| C  | -4.932927 | 0.268935  | 0.677360  |
| C  | -2.822053 | 1.098896  | -0.230992 |
| C  | -5.464746 | 0.130607  | -0.612790 |
| C  | -3.383565 | 0.981598  | -1.519950 |
| C  | -4.674098 | 0.503487  | -1.708610 |
| C  | -1.420991 | 1.515303  | -0.004403 |
| C  | -0.847199 | 2.622175  | -0.892299 |
| H  | -5.077908 | 0.413685  | -2.718426 |
| H  | -2.788090 | 1.257510  | -2.393423 |
| H  | -5.552258 | -0.002581 | 1.535174  |
| H  | -3.245200 | 0.842457  | 1.875420  |
| Cu | -0.536604 | -0.301251 | -0.032222 |
| H  | -1.448890 | 3.546400  | -0.775944 |
| H  | -0.880408 | 2.365138  | -1.961934 |
| H  | -1.290900 | 1.788451  | 1.053912  |
| H  | 7.002337  | -4.330665 | -0.028752 |
| H  | 6.374765  | -3.122460 | 1.135625  |
| H  | 7.060157  | -2.588120 | -0.427812 |
| C  | 5.119791  | -1.641592 | -2.989415 |
| H  | 5.667261  | -0.847916 | -3.518157 |
| H  | 4.136862  | -1.778088 | -3.469470 |
| H  | 5.686738  | -2.583864 | -3.085414 |
| H  | -2.543876 | -3.711715 | 1.241968  |
| H  | -1.871803 | -3.194464 | 3.797782  |
| C  | -2.671882 | -2.620214 | 1.165746  |
| H  | -2.432236 | -2.306941 | 0.140904  |
| H  | -3.726802 | -2.376438 | 1.370428  |
| C  | -1.922134 | -2.128479 | 3.533168  |
| N  | -1.795660 | -1.944181 | 2.087354  |
| H  | -2.892817 | -1.733485 | 3.877051  |
| H  | 0.088861  | -1.961541 | 4.422747  |
| C  | -0.893531 | -1.018424 | 1.767508  |
| C  | -0.734275 | -1.318946 | 4.067893  |
| N  | -0.310366 | -0.575561 | 2.881538  |
| H  | -1.011184 | -0.633742 | 4.881604  |
| H  | 1.765243  | -0.214796 | 3.043824  |
| C  | 0.813049  | 0.327397  | 2.915711  |
| H  | 0.846358  | 0.897123  | 1.977361  |



|   |           |           |           |
|---|-----------|-----------|-----------|
| H | 0.700427  | 1.042386  | 3.744031  |
| O | -7.552318 | -0.728697 | 0.163761  |
| H | -9.292781 | -0.343020 | -1.836952 |
| C | -6.841531 | -0.404891 | -0.760187 |
| H | -8.652465 | -2.013719 | -1.855195 |
| C | -8.530924 | -1.004555 | -2.275258 |
| O | -7.224567 | -0.504275 | -2.036734 |
| H | -8.654937 | -1.038091 | -3.363877 |

82

Figure 2\_para-CO2Me\_pi-allyl\_01 / electronic energy: -3732.82691538 a.u. / lowest freq: 24.29 cm-1

|    |           |           |           |
|----|-----------|-----------|-----------|
| C  | 1.305599  | 1.992604  | -0.918110 |
| C  | 1.877733  | 2.369817  | 0.320653  |
| C  | 1.096741  | 2.403695  | 1.471325  |
| O  | -1.940412 | 3.182483  | 1.294652  |
| P  | -2.541794 | 2.964682  | -0.064684 |
| O  | -1.743789 | 2.409585  | -1.214879 |
| O  | -3.879193 | 2.031793  | 0.181090  |
| O  | -3.222691 | 4.356134  | -0.617472 |
| C  | -4.682973 | 1.686538  | -0.918831 |
| H  | 1.970190  | 1.800295  | -1.761979 |
| H  | 0.242796  | 2.220993  | -1.120943 |
| H  | 2.969738  | 2.344958  | 0.420246  |
| H  | 0.011773  | 2.612418  | 1.419865  |
| H  | 1.579871  | 2.485650  | 2.449216  |
| B  | 3.464155  | -1.041781 | -0.845464 |
| O  | 4.554679  | -1.475569 | -0.141851 |
| O  | 3.745456  | 0.050580  | -1.618528 |
| C  | 5.605172  | -0.500368 | -0.295692 |
| C  | 5.171150  | 0.258230  | -1.606360 |
| C  | 6.941598  | -1.217376 | -0.392206 |
| C  | 5.573205  | 0.386303  | 0.947605  |
| C  | 5.723773  | -0.375307 | -2.880846 |
| C  | 5.453374  | 1.751497  | -1.600271 |
| H  | 5.532523  | -1.458352 | -2.910016 |
| H  | 6.805720  | -0.208439 | -2.978887 |
| H  | 5.227136  | 0.079458  | -3.750314 |
| H  | 4.940803  | 2.262020  | -0.774377 |
| H  | 5.106847  | 2.199501  | -2.543216 |
| H  | 6.533560  | 1.940387  | -1.510395 |
| H  | 4.615341  | 0.920556  | 1.035699  |
| H  | 6.383379  | 1.128988  | 0.936086  |
| H  | 5.695475  | -0.242108 | 1.841981  |
| H  | 7.750433  | -0.501021 | -0.599974 |
| H  | 6.937086  | -1.980921 | -1.180532 |
| H  | 7.165828  | -1.716193 | 0.562119  |
| C  | -1.554755 | -0.826638 | -1.706757 |
| C  | -2.833913 | -1.363373 | -1.687384 |
| C  | -0.484722 | -1.460250 | -1.045277 |
| C  | -3.094552 | -2.552613 | -0.993156 |
| C  | -0.758359 | -2.660468 | -0.363232 |
| C  | -2.040168 | -3.195058 | -0.334391 |
| C  | 0.865345  | -0.836972 | -1.061309 |
| C  | 2.059279  | -1.741059 | -0.775699 |
| H  | -2.241498 | -4.122621 | 0.205866  |
| H  | 0.042158  | -3.181206 | 0.165281  |
| H  | -3.647608 | -0.846670 | -2.197314 |
| H  | -1.388425 | 0.138689  | -2.190364 |
| Cu | 0.885098  | 0.534579  | 0.413907  |
| H  | 2.089080  | -2.556786 | -1.529390 |
| H  | 1.971950  | -2.255192 | 0.193927  |
| H  | 1.006255  | -0.308042 | -2.010654 |
| H  | -5.204977 | 0.744896  | -0.690039 |
| H  | -4.082411 | 1.541955  | -1.831597 |
| H  | -5.442618 | 2.462123  | -1.124255 |
| C  | -3.985534 | 5.130221  | 0.273531  |
| H  | -4.305723 | 6.042360  | -0.251903 |
| H  | -3.402534 | 5.418609  | 1.164396  |
| H  | -4.888140 | 4.592488  | 0.616088  |
| H  | 2.881793  | -0.664852 | 3.670744  |
| H  | 0.581598  | -1.490499 | 4.762054  |
| C  | 2.540176  | -1.212037 | 2.775567  |
| H  | 2.913094  | -0.696817 | 1.882756  |
| H  | 2.977019  | -2.221545 | 2.795510  |
| C  | 0.339919  | -1.943806 | 3.786213  |
| N  | 1.102201  | -1.279336 | 2.728009  |
| H  | 0.586735  | -3.014077 | 3.833786  |
| H  | -1.730998 | -1.269272 | 4.169295  |
| C  | 0.320220  | -0.542050 | 1.936689  |
| C  | -1.110428 | -1.679891 | 3.360103  |
| N  | -0.947385 | -0.705711 | 2.283307  |
| H  | -1.608467 | -2.581651 | 2.966687  |
| H  | -2.545813 | 0.668355  | 2.273116  |
| C  | -2.077714 | -0.090562 | 1.631018  |
| H  | -1.737689 | 0.404908  | 0.714370  |
| H  | -2.821533 | -0.856086 | 1.363490  |
| O  | -4.715920 | -4.158841 | -0.290055 |
| H  | -7.068298 | -2.918309 | -0.412569 |
| C  | -4.455075 | -3.142940 | -0.892083 |
| H  | -6.812611 | -3.895266 | -1.890432 |
| C  | -6.719225 | -2.889526 | -1.455202 |
| O  | -5.381057 | -2.421624 | -1.529674 |
| H  | -7.326024 | -2.180472 | -2.030036 |

82

Figure 2\_para-CO2Me\_pi-allyl\_02 / electronic energy: -3732.82458329 a.u. / lowest freq: 17.28 cm-1

|   |           |           |           |
|---|-----------|-----------|-----------|
| C | -0.474408 | 1.343438  | -2.190320 |
| C | -0.462405 | 0.018990  | -2.703503 |
| C | 0.504648  | -0.876110 | -2.279171 |

|    |           |           |           |
|----|-----------|-----------|-----------|
| O  | 2.097973  | -3.170749 | -0.684423 |
| P  | 3.269952  | -2.249633 | -0.517378 |
| O  | 3.172747  | -0.755193 | -0.678002 |
| O  | 3.920011  | -2.597838 | 0.964856  |
| O  | 4.501551  | -2.718151 | -1.506573 |
| C  | 5.069650  | -1.901427 | 1.378493  |
| H  | -1.338854 | 1.982135  | -2.383501 |
| H  | 0.472011  | 1.867190  | -2.021030 |
| H  | -1.373132 | -0.368321 | -3.174925 |
| H  | 1.478677  | -0.557249 | -1.872519 |
| H  | 0.410775  | -1.946046 | -2.473865 |
| B  | 0.670668  | 3.145693  | 0.321737  |
| O  | 1.303579  | 3.830667  | -0.676899 |
| O  | 1.547850  | 2.622713  | 1.230998  |
| C  | 2.726355  | 3.608537  | -0.548452 |
| C  | 2.863553  | 3.146174  | 0.951527  |
| C  | 3.455997  | 4.898392  | -0.886569 |
| C  | 3.106411  | 2.513147  | -1.541138 |
| C  | 3.088308  | 4.302893  | 1.922943  |
| C  | 3.895686  | 2.051597  | 1.178921  |
| H  | 2.341830  | 5.099752  | 1.784781  |
| H  | 4.090403  | 4.739891  | 1.806688  |
| H  | 2.994346  | 3.928320  | 2.952919  |
| H  | 3.672183  | 1.141000  | 0.603355  |
| H  | 3.925799  | 1.792838  | 2.248547  |
| H  | 4.896722  | 2.412262  | 0.895672  |
| H  | 2.654251  | 1.543326  | -1.288907 |
| H  | 4.194860  | 2.361526  | -1.567555 |
| H  | 2.780739  | 2.811773  | -2.549084 |
| H  | 4.535917  | 4.788942  | -0.707357 |
| H  | 3.085497  | 5.746469  | -0.295993 |
| H  | 3.111385  | 5.136193  | -1.950841 |
| C  | -3.148532 | 0.010865  | 1.361367  |
| C  | -4.448944 | -0.458078 | 1.259758  |
| C  | -2.680243 | 1.063467  | 0.547668  |
| C  | -5.340306 | 0.114927  | 0.343132  |
| C  | -3.594160 | 1.644676  | -0.350665 |
| C  | -4.900308 | 1.179170  | -0.453801 |
| C  | -1.252430 | 1.471031  | 0.624984  |
| C  | -0.888120 | 2.936496  | 0.404264  |
| H  | -5.587564 | 1.642455  | -1.163397 |
| H  | -3.274236 | 2.469890  | -0.990660 |
| H  | -4.794133 | -1.277931 | 1.893066  |
| H  | -2.464042 | -0.448114 | 2.079274  |
| Cu | -0.439009 | 0.111051  | -0.598580 |
| H  | -1.282500 | 3.534485  | 1.249975  |
| H  | -1.350206 | 3.349398  | -0.503999 |
| H  | -0.822905 | 1.125017  | 1.574901  |
| H  | 5.442039  | -2.373540 | 2.299901  |
| H  | 4.856651  | -0.838642 | 1.588560  |
| H  | 5.866807  | -1.944117 | 0.616382  |
| C  | 4.802937  | -4.087105 | -1.606700 |
| H  | 5.580801  | -4.211882 | -2.375145 |
| H  | 3.916843  | -4.676540 | -1.896558 |
| H  | 5.187925  | -4.494139 | -0.653939 |
| H  | -1.406307 | -3.549395 | -1.351890 |
| H  | 0.198015  | -4.371143 | 0.641527  |
| C  | -1.807187 | -2.840951 | -0.607241 |
| H  | -2.078604 | -1.905728 | -1.115360 |
| H  | -2.719937 | -3.276338 | -0.170563 |
| C  | -0.319106 | -3.632813 | 1.272043  |
| N  | -0.841844 | -2.566113 | 0.421770  |
| H  | -1.132926 | -4.125029 | 1.825961  |
| H  | 1.684974  | -3.289170 | 2.112511  |
| C  | -0.182709 | -1.421231 | 0.588343  |
| C  | 0.666401  | -2.881066 | 2.174121  |
| N  | 0.654881  | -1.533440 | 1.608206  |
| H  | 0.350969  | -2.849415 | 3.230090  |
| H  | 2.557162  | -0.861361 | 2.129212  |
| C  | 1.515954  | -0.512572 | 2.143489  |
| H  | 1.445727  | 0.398422  | 1.541483  |
| H  | 1.231446  | -0.276913 | 3.183265  |
| O  | -7.125244 | -1.363125 | 0.918354  |
| H  | -9.363737 | -0.178992 | 0.151473  |
| C  | -6.719562 | -0.436652 | 0.256214  |
| H  | -8.829960 | -1.305994 | -1.132806 |
| C  | -8.809368 | -0.259490 | -0.794827 |
| O  | -7.474233 | 0.199802  | -0.641510 |
| H  | -9.270891 | 0.384289  | -1.552350 |

56

Figure 3 L-Cu-OtBu dimer / electronic energy: -4668.27269506 a.u. / lowest freq: 20.28 cm<sup>-1</sup>

|   |           |           |           |
|---|-----------|-----------|-----------|
| H | 1.454781  | 3.185323  | 2.121955  |
| H | -1.091667 | 3.295320  | 2.232897  |
| H | 1.480610  | 4.376760  | 0.788877  |
| C | 1.390257  | 3.304563  | 1.028715  |
| H | 2.248895  | 2.774926  | 0.584062  |
| H | -1.141168 | 4.483981  | 0.897486  |
| C | -1.116435 | 3.408141  | 1.137329  |
| C | 0.084478  | 2.685555  | 0.510787  |
| O | 0.044189  | 1.344738  | 0.873648  |
| H | -2.049560 | 2.947919  | 0.774353  |
| H | 0.052315  | 3.874754  | -1.357879 |
| C | 0.025055  | 2.825701  | -1.018825 |
| H | 0.875658  | 2.290877  | -1.472279 |
| H | -0.901160 | 2.361194  | -1.396152 |
| H | 2.958274  | 1.006115  | -2.657041 |
| H | 3.299551  | -1.873435 | -2.121429 |

|    |           |           |           |
|----|-----------|-----------|-----------|
| C  | 3.677359  | 1.175331  | -1.841405 |
| C  | 3.978968  | -1.600940 | -1.299765 |
| H  | 4.699652  | 1.104301  | -2.245503 |
| H  | 3.518839  | 2.190392  | -1.447525 |
| H  | 4.999010  | -1.491753 | -1.701120 |
| H  | 3.968610  | -2.417548 | -0.562485 |
| P  | 3.392482  | -0.052886 | -0.509011 |
| C  | 4.751395  | 0.319901  | 0.663359  |
| H  | 5.728245  | 0.345249  | 0.155766  |
| H  | 4.568915  | 1.292893  | 1.143584  |
| H  | 4.770992  | -0.448839 | 1.450266  |
| Cu | 1.387359  | -0.047785 | 0.355891  |
| H  | 1.052783  | -3.300511 | 2.261431  |
| H  | 2.049259  | -2.926990 | 0.836004  |
| O  | -0.048207 | -1.342931 | 0.876207  |
| C  | 1.110810  | -3.401807 | 1.166003  |
| H  | 1.154224  | -4.474801 | 0.916365  |
| C  | -0.077761 | -2.683448 | 0.511400  |
| H  | -1.486976 | -3.182509 | 2.088692  |
| H  | 0.959296  | -2.370999 | -1.370977 |
| C  | -1.393184 | -3.307099 | 0.998157  |
| C  | 0.017837  | -2.822386 | -1.016552 |
| H  | -2.243357 | -2.784789 | 0.529205  |
| H  | -1.470986 | -4.380974 | 0.761611  |
| H  | -0.814236 | -2.274610 | -1.489485 |
| H  | -0.015593 | -3.870539 | -1.357852 |
| H  | -2.864028 | -0.603368 | -2.784246 |
| H  | -3.433166 | 2.132063  | -1.768599 |
| C  | -3.581006 | -0.953346 | -2.026339 |
| C  | -4.101882 | 1.661026  | -1.032388 |
| H  | -4.600512 | -0.883806 | -2.437656 |
| H  | -3.356876 | -2.007230 | -1.803518 |
| H  | -5.099460 | 1.538334  | -1.483310 |
| H  | -4.181695 | 2.333019  | -0.164790 |
| P  | -3.397860 | 0.051973  | -0.503299 |
| C  | -4.732552 | -0.612373 | 0.562621  |
| H  | -5.709729 | -0.575241 | 0.056317  |
| H  | -4.504550 | -1.654856 | 0.830705  |
| H  | -4.786261 | -0.026266 | 1.492473  |
| Cu | -1.393433 | 0.048543  | 0.362283  |

28

Figure 3 L-Cu-OtBu / electronic energy: -2334.10735270 a.u. / lowest freq: -39.13 cm-1

|    |           |           |           |
|----|-----------|-----------|-----------|
| H  | -4.105877 | -1.332535 | 0.968255  |
| H  | -4.149740 | -1.387400 | -0.808196 |
| O  | -1.712519 | -0.853226 | 0.000001  |
| C  | -4.074557 | -0.711355 | 0.058637  |
| H  | -4.956088 | -0.048773 | 0.060108  |
| C  | -2.745372 | 0.062111  | 0.000906  |
| H  | -2.638090 | 0.394148  | 2.149194  |
| H  | -2.753281 | 0.265927  | -2.166060 |
| C  | -2.653965 | 0.994061  | 1.224813  |
| C  | -2.718854 | 0.919727  | -1.279501 |
| H  | -1.712633 | 1.569392  | 1.184920  |
| H  | -3.490501 | 1.710689  | 1.287963  |
| H  | -1.776368 | 1.492537  | -1.324725 |
| H  | -3.557324 | 1.634317  | -1.340220 |
| H  | 2.442116  | 1.017710  | -2.209934 |
| H  | 3.078065  | -1.733910 | -1.400494 |
| C  | 2.702639  | 1.337847  | -1.190198 |
| C  | 3.315084  | -1.349708 | -0.397345 |
| H  | 3.784909  | 1.532944  | -1.136890 |
| H  | 2.155445  | 2.266931  | -0.971809 |
| H  | 4.370113  | -1.036408 | -0.368346 |
| H  | 3.157970  | -2.162063 | 0.327594  |
| P  | 2.201656  | 0.043634  | 0.000306  |
| C  | 2.853579  | 0.661225  | 1.592861  |
| H  | 3.931571  | 0.875098  | 1.526895  |
| H  | 2.317993  | 1.579995  | 1.874683  |
| H  | 2.679866  | -0.091178 | 2.376412  |
| Cu | 0.062960  | -0.408951 | -0.003275 |

70

Figure 3 ed / electronic energy: -3155.87460188 a.u. / lowest freq: 11.42 cm-1

|    |           |           |           |
|----|-----------|-----------|-----------|
| H  | -0.953281 | -3.166097 | -0.309839 |
| H  | -2.577969 | -2.483931 | -0.153509 |
| O  | -0.722801 | -0.949157 | 1.165859  |
| C  | -1.784111 | -3.004943 | 0.394843  |
| H  | -2.158222 | -3.987377 | 0.724568  |
| C  | -1.300935 | -2.179344 | 1.589376  |
| H  | 0.648291  | -3.149536 | 1.617528  |
| H  | -3.221244 | -1.298799 | 2.101803  |
| C  | -0.183773 | -2.938745 | 2.311306  |
| C  | -2.439912 | -1.904482 | 2.572798  |
| H  | 0.208864  | -2.337581 | 3.146164  |
| H  | -0.544498 | -3.898139 | 2.713555  |
| H  | -2.060320 | -1.341525 | 3.439455  |
| H  | -2.878571 | -2.846939 | 2.937460  |
| Cu | 1.139839  | -0.920846 | 0.386293  |
| H  | 1.056430  | 4.912258  | 0.610864  |
| H  | 2.420469  | 3.941746  | 2.458899  |
| H  | 0.701370  | 3.458516  | 2.402659  |
| C  | 1.735449  | 3.084044  | 2.391288  |
| H  | 2.707250  | 4.756558  | -0.052951 |
| H  | 1.879972  | 2.458170  | 3.283891  |
| C  | 1.657698  | 4.452166  | -0.184163 |
| H  | 1.306082  | 4.849580  | -1.147882 |
| C  | 1.534322  | 2.938372  | -0.174971 |
| C  | 2.012113  | 2.248287  | 1.144500  |

|   |           |           |           |
|---|-----------|-----------|-----------|
| O | 0.145692  | 2.568639  | -0.221946 |
| H | 4.143931  | 2.596400  | 0.951770  |
| B | -0.029916 | 1.375300  | 0.444402  |
| H | 3.702501  | 1.320418  | 2.112925  |
| C | 3.450475  | 1.762470  | 1.137384  |
| O | 1.127301  | 1.108628  | 1.201500  |
| H | 3.251675  | 2.634595  | -1.503243 |
| C | 2.195444  | 2.340356  | -1.418544 |
| H | 1.664689  | 2.695001  | -2.313853 |
| H | 3.609342  | 0.994382  | 0.369926  |
| H | 2.135444  | 1.240689  | -1.404032 |
| H | -3.741486 | -1.478482 | -2.045890 |
| H | -4.291404 | -1.318464 | 0.099435  |
| H | -2.833922 | -0.708588 | -3.361743 |
| C | -3.485339 | -0.510025 | -2.496037 |
| O | -1.630269 | -0.279491 | -1.014975 |
| H | -5.500527 | -0.242437 | -0.645178 |
| C | -4.684450 | -0.292834 | 0.091969  |
| H | -4.409992 | -0.043182 | -2.870615 |
| B | -1.338180 | 0.190930  | 0.348230  |
| H | -5.115024 | -0.091914 | 1.085474  |
| C | -2.753803 | 0.399038  | -1.508504 |
| C | -3.582938 | 0.736127  | -0.195713 |
| O | -2.623638 | 0.690654  | 0.835872  |
| H | -1.601520 | 1.343872  | -3.063483 |
| C | -2.292899 | 1.655469  | -2.264419 |
| H | -3.130173 | 2.197298  | -2.730793 |
| H | -1.740687 | 2.341103  | -1.608781 |
| H | -4.940611 | 2.237160  | -1.041325 |
| C | -4.225555 | 2.125176  | -0.210655 |
| H | -4.773476 | 2.286728  | 0.730889  |
| H | -3.466517 | 2.914749  | -0.291729 |
| H | 4.749033  | -1.452497 | -0.129415 |
| C | 4.256493  | -1.368792 | -1.109548 |
| H | 4.274484  | -0.314095 | -1.421428 |
| H | 4.817512  | -1.966521 | -1.844659 |
| H | 3.139485  | -3.910893 | 0.308949  |
| C | 2.717087  | -3.740696 | -0.692506 |
| P | 2.524841  | -1.944693 | -0.980227 |
| H | 3.382198  | -4.194279 | -1.443776 |
| H | 1.733374  | -4.230143 | -0.742993 |
| C | 1.932965  | -1.853706 | -2.708395 |
| H | 2.575860  | -2.437454 | -3.385113 |
| H | 1.920774  | -0.803126 | -3.035062 |
| H | 0.902696  | -2.235271 | -2.761689 |

70

Figure 3\_ts(TB) / electronic energy: -3155.86594930 a.u. / lowest freq: -80.57 cm<sup>-1</sup>

|    |           |           |           |
|----|-----------|-----------|-----------|
| H  | 3.010276  | -2.382916 | 0.118642  |
| H  | 1.683795  | -3.550734 | 0.289052  |
| O  | 0.986480  | -1.022586 | 1.231429  |
| C  | 2.428017  | -2.966919 | 0.847086  |
| H  | 3.108602  | -3.663642 | 1.360560  |
| C  | 1.764613  | -2.038365 | 1.865178  |
| H  | 3.454412  | -0.689234 | 1.957273  |
| H  | 0.067382  | -3.345104 | 2.249766  |
| C  | 2.833443  | -1.280682 | 2.648443  |
| C  | 0.860433  | -2.829879 | 2.810029  |
| H  | 2.364821  | -0.587587 | 3.363520  |
| H  | 3.486796  | -1.968789 | 3.205755  |
| H  | 0.379103  | -2.153513 | 3.532327  |
| H  | 1.437600  | -3.583696 | 3.368135  |
| Cu | 1.191646  | 0.705211  | -0.156501 |
| H  | -4.427383 | 0.766248  | -0.614487 |
| H  | -4.518683 | 0.953062  | 1.818726  |
| H  | -3.273614 | -0.182983 | 1.196620  |
| C  | -3.444824 | 0.713535  | 1.807889  |
| H  | -4.940033 | 2.443526  | -0.292598 |
| H  | -3.136606 | 0.474696  | 2.836818  |
| C  | -4.170605 | 1.821119  | -0.775127 |
| H  | -4.205093 | 2.017783  | -1.857471 |
| C  | -2.789480 | 2.154856  | -0.232080 |
| C  | -2.601465 | 1.882699  | 1.299916  |
| O  | -1.819873 | 1.275125  | -0.815333 |
| H  | -3.824652 | 3.498708  | 2.084955  |
| B  | -0.832690 | 0.986003  | 0.123485  |
| H  | -2.656331 | 2.821205  | 3.244537  |
| C  | -2.803566 | 3.100143  | 2.190308  |
| O  | -1.228345 | 1.472481  | 1.363096  |
| H  | -3.133588 | 4.320679  | -0.285336 |
| C  | -2.402291 | 3.578362  | -0.637798 |
| H  | -2.355518 | 3.636570  | -1.735582 |
| H  | -2.091022 | 3.901305  | 1.952964  |
| H  | -1.410567 | 3.846106  | -0.243686 |
| H  | 0.204209  | -4.250825 | -1.796312 |
| H  | -0.675749 | -4.205721 | 0.241701  |
| H  | 0.503640  | -3.256638 | -3.237470 |
| C  | -0.244142 | -3.509492 | -2.470797 |
| O  | 0.458693  | -1.748160 | -1.013589 |
| H  | -2.092610 | -4.638531 | -0.753443 |
| C  | -1.697902 | -3.906637 | -0.032981 |
| H  | -1.103862 | -3.973045 | -2.978655 |
| B  | 0.018530  | -1.182613 | 0.206285  |
| H  | -2.317693 | -3.950556 | 0.875196  |
| C  | -0.662553 | -2.241330 | -1.733040 |
| C  | -1.728672 | -2.480221 | -0.585246 |
| O  | -1.295504 | -1.617289 | 0.465873  |
| H  | -0.223704 | -0.958441 | -3.401261 |

|   |           |           |           |
|---|-----------|-----------|-----------|
| C | -1.089544 | -1.191204 | -2.761739 |
| H | -1.896569 | -1.564732 | -3.410033 |
| H | -1.420470 | -0.261620 | -2.282477 |
| H | -3.480699 | -2.692998 | -1.858133 |
| C | -3.151903 | -2.111553 | -0.982870 |
| H | -3.844242 | -2.329239 | -0.155058 |
| H | -3.222981 | -1.042608 | -1.218567 |
| H | 3.073834  | 3.432394  | 1.120755  |
| C | 3.095595  | 3.493894  | 0.022203  |
| H | 2.193451  | 4.031342  | -0.305906 |
| H | 3.990738  | 4.052076  | -0.293219 |
| H | 4.736915  | 1.037154  | 0.921073  |
| C | 4.694130  | 1.124469  | -0.174737 |
| P | 3.070384  | 1.803289  | -0.674895 |
| H | 5.518167  | 1.770887  | -0.515219 |
| H | 4.823307  | 0.120668  | -0.606383 |
| C | 3.271177  | 2.077403  | -2.471443 |
| H | 4.160947  | 2.686342  | -2.694837 |
| H | 2.375105  | 2.582414  | -2.861624 |
| H | 3.361485  | 1.104827  | -2.978490 |

70

Figure 3\_prod / electronic energy: -3155.88950452 a.u. / lowest freq: 21.62 cm-1

|    |           |           |           |
|----|-----------|-----------|-----------|
| H  | -1.158855 | -0.853872 | 2.044678  |
| H  | -2.081368 | 0.534440  | 1.412845  |
| O  | 0.476218  | 1.273606  | 2.005172  |
| C  | -1.632766 | 0.101521  | 2.318332  |
| H  | -2.432894 | -0.100666 | 3.046635  |
| C  | -0.605099 | 1.058362  | 2.919658  |
| H  | 0.524730  | -0.514821 | 3.893677  |
| H  | -1.708831 | 2.852240  | 2.370142  |
| C  | 0.037748  | 0.436514  | 4.155433  |
| C  | -1.246887 | 2.403039  | 3.261372  |
| H  | 0.800788  | 1.111086  | 4.572434  |
| H  | -0.716472 | 0.240474  | 4.932049  |
| H  | -0.490899 | 3.101512  | 3.652262  |
| H  | -2.026382 | 2.277814  | 4.028140  |
| Cu | -1.162098 | -1.530549 | -0.469595 |
| H  | 3.580583  | 0.620775  | -0.295027 |
| H  | 4.155902  | -0.696748 | 1.828001  |
| H  | 2.467465  | -0.158497 | 1.567577  |
| C  | 3.113119  | -1.032974 | 1.727857  |
| H  | 5.013044  | -0.445128 | -0.480147 |
| H  | 2.813949  | -1.499307 | 2.678963  |
| C  | 4.011688  | -0.207170 | -0.872112 |
| H  | 4.132527  | 0.132623  | -1.911993 |
| C  | 3.106855  | -1.430692 | -0.824697 |
| C  | 2.945747  | -2.057257 | 0.604145  |
| O  | 1.763095  | -1.042039 | -1.140811 |
| H  | 4.896752  | -2.999208 | 0.793143  |
| B  | 0.857046  | -1.733858 | -0.337362 |
| H  | 3.652152  | -3.642033 | 1.890565  |
| C  | 3.831372  | -3.266557 | 0.871685  |
| O  | 1.571398  | -2.467038 | 0.608300  |
| H  | 4.595766  | -2.740742 | -1.760293 |
| C  | 3.543447  | -2.443828 | -1.883977 |
| H  | 3.430968  | -1.987531 | -2.879035 |
| H  | 3.625644  | -4.087120 | 0.171499  |
| H  | 2.917986  | -3.348697 | -1.857648 |
| H  | -1.188959 | 4.543120  | -0.961219 |
| H  | 0.838043  | 4.659257  | 0.115279  |
| H  | -2.279828 | 3.395564  | -1.769932 |
| C  | -1.230561 | 3.715188  | -1.680966 |
| O  | -0.748295 | 2.177348  | 0.104616  |
| H  | 1.217478  | 4.989554  | -1.597762 |
| C  | 1.435817  | 4.327569  | -0.747385 |
| H  | -0.904775 | 4.086148  | -2.664441 |
| B  | 0.397248  | 1.808796  | 0.768095  |
| H  | 2.497981  | 4.443808  | -0.486318 |
| C  | -0.374050 | 2.539678  | -1.237950 |
| C  | 1.163803  | 2.862937  | -1.086359 |
| O  | 1.537557  | 2.088052  | 0.061507  |
| H  | -1.693283 | 1.038056  | -2.022193 |
| C  | -0.638926 | 1.330245  | -2.128884 |
| H  | -0.452594 | 1.559433  | -3.188203 |
| H  | -0.013144 | 0.474822  | -1.835748 |
| H  | 1.667555  | 2.926311  | -3.195542 |
| C  | 2.005995  | 2.427305  | -2.274763 |
| H  | 3.058190  | 2.701403  | -2.107369 |
| H  | 1.953583  | 1.339765  | -2.409554 |
| H  | -3.849992 | -3.526552 | -1.811768 |
| C  | -4.138767 | -2.476486 | -1.968429 |
| H  | -3.730136 | -2.151784 | -2.937054 |
| H  | -5.237257 | -2.405102 | -1.996484 |
| H  | -3.969700 | -3.065287 | 1.097540  |
| C  | -4.312146 | -2.048283 | 0.854783  |
| P  | -3.430509 | -1.445333 | -0.632444 |
| H  | -5.401729 | -2.061155 | 0.696600  |
| H  | -4.080638 | -1.396766 | 1.709930  |
| C  | -4.218331 | 0.182703  | -0.927440 |
| H  | -5.316094 | 0.104994  | -0.887227 |
| H  | -3.927434 | 0.563017  | -1.917896 |
| H  | -3.880941 | 0.905727  | -0.169933 |

35

Figure 3\_L-Cu-Bpin / electronic energy: -2512.09747879 a.u. / lowest freq: 23.70 cm-1

|   |           |           |           |
|---|-----------|-----------|-----------|
| H | -3.966569 | -2.370555 | -0.091079 |
| H | -3.807068 | -0.481958 | -2.357598 |
| C | -4.300635 | -1.524404 | 0.527882  |

|    |           |           |           |
|----|-----------|-----------|-----------|
| C  | -4.141575 | 0.306361  | -1.666690 |
| H  | -5.393074 | -1.419924 | 0.438009  |
| H  | -4.044913 | -1.745522 | 1.575060  |
| H  | -5.242483 | 0.322371  | -1.642579 |
| H  | -3.774702 | 1.270837  | -2.048864 |
| P  | -3.438874 | 0.000252  | -0.004071 |
| C  | -4.231120 | 1.295459  | 1.018181  |
| H  | -5.326265 | 1.285342  | 0.903062  |
| H  | -3.978324 | 1.134755  | 2.076846  |
| H  | -3.846004 | 2.282421  | 0.721008  |
| H  | 3.908707  | -2.418790 | -1.177398 |
| H  | 3.178529  | -2.542187 | 1.157081  |
| C  | 3.960241  | -1.319391 | -1.165315 |
| H  | 3.658664  | -0.959332 | -2.157930 |
| H  | 5.009094  | -1.032819 | -0.991557 |
| C  | 3.381449  | -1.465540 | 1.257698  |
| O  | 1.691138  | -1.070941 | -0.382227 |
| H  | 4.437392  | -1.340205 | 1.540068  |
| C  | 3.058289  | -0.772965 | -0.067653 |
| H  | 2.751180  | -1.078631 | 2.072035  |
| B  | 0.869426  | -0.027376 | 0.045169  |
| H  | 2.597061  | 1.082407  | -2.068948 |
| C  | 3.034990  | 0.788202  | 0.049573  |
| H  | 4.301435  | 1.400842  | -1.634829 |
| O  | 1.677868  | 1.040108  | 0.438088  |
| C  | 3.260011  | 1.490169  | -1.291420 |
| H  | 5.023511  | 1.114048  | 0.867358  |
| H  | 3.740760  | 0.997181  | 2.103774  |
| C  | 3.976365  | 1.366007  | 1.096660  |
| H  | 3.026918  | 2.559483  | -1.177997 |
| H  | 3.888770  | 2.463056  | 1.112142  |
| Cu | -1.167130 | -0.038843 | 0.055765  |

59

Figure 3\_para-NMe2\_pcl / electronic energy: -2955.28953194 a.u. / lowest freq: 19.21 cm<sup>-1</sup>

|    |           |           |           |
|----|-----------|-----------|-----------|
| H  | 1.479945  | 1.524019  | 2.416808  |
| H  | -1.037372 | 0.078138  | 2.232063  |
| C  | 1.037927  | 2.401492  | 1.921216  |
| C  | -1.464579 | 1.017236  | 1.849373  |
| H  | 0.630269  | 3.081742  | 2.685511  |
| H  | 1.837329  | 2.915703  | 1.366610  |
| H  | -1.734189 | 1.664685  | 2.698543  |
| H  | -2.371929 | 0.772811  | 1.277064  |
| P  | -0.248151 | 1.831167  | 0.750060  |
| C  | -1.096501 | 3.384165  | 0.279014  |
| H  | -1.409974 | 3.961652  | 1.162876  |
| H  | -0.421529 | 4.001504  | -0.332996 |
| H  | -1.984445 | 3.142302  | -0.323958 |
| H  | -3.394859 | -2.638351 | 0.356341  |
| C  | -4.569333 | -0.846937 | -0.044354 |
| C  | -3.420857 | -1.668054 | -0.139260 |
| H  | -5.355066 | 1.092653  | -0.656446 |
| C  | -4.509282 | 0.406404  | -0.696065 |
| H  | 4.261498  | -3.279540 | 1.638543  |
| C  | -2.299837 | -1.264325 | -0.854550 |
| H  | 3.430978  | -1.335262 | 2.889521  |
| H  | -1.436323 | -1.934741 | -0.882265 |
| C  | -3.378399 | 0.791731  | -1.407625 |
| C  | -2.242219 | -0.023480 | -1.509280 |
| C  | 4.754008  | -2.656479 | 0.876641  |
| C  | 4.066112  | -0.693426 | 2.260617  |
| H  | 4.655618  | -3.168086 | -0.089963 |
| O  | 2.762241  | -1.384597 | 0.385961  |
| H  | -3.379009 | 1.768564  | -1.900518 |
| H  | 5.062930  | -0.637704 | 2.722891  |
| H  | 5.823130  | -2.590521 | 1.131955  |
| C  | 4.116457  | -1.275485 | 0.846396  |
| C  | -1.049060 | 0.455018  | -2.236224 |
| B  | 2.428691  | -0.249076 | -0.353412 |
| H  | -0.039005 | -1.433981 | -2.600099 |
| C  | -0.008457 | -0.343896 | -2.689857 |
| C  | 4.738242  | -0.285225 | -0.194138 |
| H  | 4.541799  | -1.691186 | -1.854603 |
| O  | 3.594775  | 0.479409  | -0.596766 |
| H  | 6.209829  | -1.540389 | -1.231647 |
| H  | 6.650529  | 0.086715  | 0.772743  |
| C  | 5.280425  | -0.989167 | -1.439808 |
| H  | 0.693637  | 0.047576  | -3.431383 |
| C  | 5.797197  | 0.652823  | 0.368021  |
| H  | 5.495739  | -0.234083 | -2.210667 |
| H  | 6.175966  | 1.309209  | -0.430153 |
| Cu | 0.564609  | 0.432684  | -0.872031 |
| H  | -1.120368 | 1.479864  | -2.619018 |
| H  | 3.626123  | 0.315071  | 2.254665  |
| H  | 5.393711  | 1.293572  | 1.163244  |
| H  | -6.448188 | 0.573165  | 1.462320  |
| H  | -7.190130 | 0.054371  | -0.075448 |
| C  | -6.764255 | -0.309956 | 0.874159  |
| H  | -7.573229 | -0.808609 | 1.421989  |
| N  | -5.689222 | -1.247912 | 0.652312  |
| H  | -5.427562 | -3.341983 | 0.802712  |
| H  | -6.626579 | -2.629767 | 1.896388  |
| C  | -5.647095 | -2.463086 | 1.431529  |
| H  | -4.888662 | -2.428297 | 2.236860  |

59

Figure 3\_para-NMe2\_ts(CuBadd) / electronic energy: -2955.27152489 a.u. / lowest freq: -202.76 cm<sup>-1</sup>

|   |           |          |          |
|---|-----------|----------|----------|
| H | 1.379351  | 1.949989 | 2.490398 |
| H | -1.430913 | 1.366103 | 1.951738 |

|    |           |           |           |
|----|-----------|-----------|-----------|
| C  | 1.269210  | 2.903932  | 1.953962  |
| C  | -1.500094 | 2.335546  | 1.436778  |
| H  | 0.938852  | 3.682529  | 2.659076  |
| H  | 2.249679  | 3.181522  | 1.539116  |
| H  | -1.741145 | 3.120951  | 2.169704  |
| H  | -2.306245 | 2.267261  | 0.691241  |
| P  | 0.080343  | 2.678391  | 0.584653  |
| C  | -0.132032 | 4.366707  | -0.078181 |
| H  | -0.407187 | 5.075884  | 0.717447  |
| H  | 0.805007  | 4.697384  | -0.550409 |
| H  | -0.919764 | 4.354976  | -0.845710 |
| H  | -2.759219 | -2.008469 | 1.373097  |
| C  | -4.181310 | -1.002820 | 0.072752  |
| C  | -2.894627 | -1.419446 | 0.465141  |
| H  | -5.223718 | 0.070485  | -1.510734 |
| C  | -4.258130 | -0.266061 | -1.130753 |
| H  | 2.833084  | -3.125120 | 2.307532  |
| C  | -1.759021 | -1.094924 | -0.277803 |
| H  | 2.868098  | -0.760419 | 2.951793  |
| H  | -0.790319 | -1.440957 | 0.095428  |
| C  | -3.120616 | 0.052249  | -1.863647 |
| C  | -1.822430 | -0.337635 | -1.468295 |
| C  | 3.431156  | -2.953968 | 1.400040  |
| C  | 3.624715  | -0.585327 | 2.172483  |
| H  | 3.059957  | -3.629630 | 0.618429  |
| O  | 1.983740  | -1.218517 | 0.555368  |
| H  | -3.240964 | 0.629087  | -2.786338 |
| H  | 4.615378  | -0.786466 | 2.605647  |
| H  | 4.475124  | -3.219020 | 1.627489  |
| C  | 3.327855  | -1.496275 | 0.980761  |
| C  | -0.634354 | 0.063738  | -2.216926 |
| B  | 2.037706  | -0.277016 | -0.458753 |
| H  | 0.646096  | -1.602550 | -1.576141 |
| C  | 0.666330  | -0.572442 | -1.964712 |
| C  | 4.159085  | -1.120214 | -0.295261 |
| H  | 3.283978  | -2.718875 | -1.501182 |
| O  | 3.333815  | -0.107193 | -0.901567 |
| H  | 4.942696  | -3.059733 | -0.937003 |
| H  | 6.152686  | -1.257500 | 0.550525  |
| C  | 4.267230  | -2.269638 | -1.296082 |
| H  | 1.384099  | -0.479021 | -2.788907 |
| C  | 5.535346  | -0.540202 | -0.011732 |
| H  | 4.667238  | -1.881354 | -2.244550 |
| H  | 6.050180  | -0.319743 | -0.958777 |
| Cu | 0.518516  | 1.042817  | -0.827335 |
| H  | -0.794300 | 0.534676  | -3.191331 |
| H  | 3.576669  | 0.476207  | 1.886864  |
| H  | 5.471428  | 0.393037  | 0.563097  |
| H  | -6.789045 | -0.043063 | -0.014960 |
| H  | -6.765054 | -1.688905 | -0.702616 |
| C  | -6.615141 | -1.104170 | 0.227662  |
| H  | -7.393636 | -1.401322 | 0.942236  |
| N  | -5.317031 | -1.305182 | 0.824758  |
| H  | -4.882604 | -3.286425 | 1.501859  |
| H  | -6.176820 | -2.411618 | 2.366136  |
| C  | -5.204098 | -2.291273 | 1.871694  |
| H  | -4.484983 | -1.977088 | 2.645490  |

59

Figure 3 para-NMe2 L-Cu-alkyl\_01 / electronic energy: -2955.32654850 a.u. / lowest freq: 24.87 cm<sup>-1</sup>

|   |           |           |           |
|---|-----------|-----------|-----------|
| H | 1.025355  | 2.129053  | 2.738448  |
| H | -0.154850 | 4.214965  | 0.990474  |
| C | 1.985960  | 2.412384  | 2.283806  |
| C | 0.839478  | 4.373621  | 0.546637  |
| H | 2.394254  | 3.286185  | 2.814829  |
| H | 2.684432  | 1.570807  | 2.397805  |
| H | 1.380425  | 5.132318  | 1.133205  |
| H | 0.700335  | 4.741894  | -0.480652 |
| P | 1.743742  | 2.783581  | 0.508084  |
| C | 3.420166  | 3.267906  | -0.042717 |
| H | 3.850765  | 4.037626  | 0.616413  |
| H | 4.077217  | 2.385249  | -0.045776 |
| H | 3.367653  | 3.658059  | -1.070132 |
| H | -3.474573 | -2.137388 | 0.848134  |
| C | -4.255634 | -0.229180 | 0.160886  |
| C | -3.282987 | -1.242441 | 0.254724  |
| H | -4.632870 | 1.695863  | -0.784424 |
| C | -3.922591 | 0.879338  | -0.648354 |
| H | 1.146242  | -3.880569 | 2.138805  |
| C | -2.055448 | -1.146414 | -0.404920 |
| H | 0.409925  | -1.557355 | 2.186927  |
| H | -1.338177 | -1.959663 | -0.275899 |
| C | -2.695462 | 0.959543  | -1.297789 |
| C | -1.709151 | -0.043685 | -1.206478 |
| C | 2.072610  | -3.641926 | 1.595426  |
| C | 1.379547  | -1.245932 | 1.771908  |
| H | 2.293727  | -4.479430 | 0.920928  |
| O | 0.901021  | -2.512557 | -0.184005 |
| H | -2.492937 | 1.842950  | -1.913462 |
| H | 2.069690  | -1.059882 | 2.607296  |
| H | 2.885873  | -3.559127 | 2.332388  |
| C | 1.897800  | -2.337298 | 0.835533  |
| C | -0.404681 | 0.097085  | -1.923641 |
| B | 1.246354  | -1.718188 | -1.252222 |
| H | -0.484090 | -2.004186 | -2.636649 |
| C | 0.266385  | -1.233359 | -2.370339 |
| C | 3.153323  | -1.884405 | -0.003125 |
| H | 3.408909  | -3.826395 | -0.966924 |

|    |           |           |           |
|----|-----------|-----------|-----------|
| O  | 2.552303  | -1.298846 | -1.167639 |
| H  | 4.557360  | -3.518389 | 0.365464  |
| H  | 4.394153  | -1.184900 | 1.643407  |
| C  | 4.015467  | -3.054119 | -0.471201 |
| H  | 0.857015  | -1.037877 | -3.280957 |
| C  | 4.014743  | -0.829159 | 0.673633  |
| H  | 4.754623  | -2.687091 | -1.198488 |
| H  | 4.878831  | -0.586511 | 0.037168  |
| Cu | 0.701465  | 1.259066  | -0.749843 |
| H  | -0.595387 | 0.709957  | -2.823593 |
| H  | 1.221034  | -0.302701 | 1.224252  |
| H  | 3.442334  | 0.094194  | 0.830348  |
| H  | -6.276387 | 1.631683  | 0.573284  |
| H  | -6.824370 | 0.454207  | -0.650103 |
| C  | -6.543940 | 0.574555  | 0.416193  |
| H  | -7.436468 | 0.376867  | 1.024218  |
| N  | -5.479972 | -0.310741 | 0.827514  |
| H  | -5.961427 | -2.387723 | 0.643811  |
| H  | -6.835802 | -1.470281 | 1.901767  |
| C  | -5.866554 | -1.579152 | 1.397448  |
| H  | -5.144178 | -1.915863 | 2.157745  |

59

Figure 3\_para-NMe2\_L-Cu-alkyl\_02 / electronic energy: -2955.32118714 a.u. / lowest freq: 17.17 cm-1

|    |           |           |           |
|----|-----------|-----------|-----------|
| H  | 6.279836  | 1.111865  | 1.565747  |
| H  | 6.896257  | 0.453534  | -1.025047 |
| H  | 6.895033  | -1.487176 | 0.935342  |
| C  | 5.201086  | 0.954773  | 1.411500  |
| H  | 4.737990  | 1.901681  | 1.096226  |
| H  | 4.739597  | 0.650845  | 2.362847  |
| C  | 5.845718  | 0.261344  | -1.293054 |
| C  | 5.845057  | -1.758078 | 0.744255  |
| H  | 5.396395  | 1.187440  | -1.681480 |
| H  | 5.395646  | -2.140256 | 1.672891  |
| H  | 5.809574  | -0.496998 | -2.089362 |
| H  | 5.810592  | -2.559755 | -0.008470 |
| P  | 4.879049  | -0.324634 | 0.145448  |
| Cu | 2.717358  | -0.689413 | -0.249491 |
| C  | 0.790672  | -0.947399 | -0.583619 |
| H  | 0.450572  | -2.093831 | 1.292207  |
| H  | -0.247205 | 0.125546  | 1.756966  |
| C  | 0.128194  | 0.377017  | -0.359194 |
| C  | -0.353691 | 0.790119  | 0.895663  |
| H  | 0.268798  | 1.033422  | -2.411235 |
| C  | -0.070821 | 1.298276  | -1.403996 |
| C  | -0.996422 | 2.011775  | 1.094900  |
| C  | -0.703252 | 2.525392  | -1.225980 |
| H  | -1.354874 | 2.245897  | 2.098035  |
| H  | -0.830993 | 3.171628  | -2.095345 |
| C  | -1.185568 | 2.926162  | 0.039069  |
| H  | 0.664722  | -1.189511 | -1.654896 |
| C  | 0.146127  | -2.105102 | 0.231110  |
| H  | 0.516780  | -3.067767 | -0.164172 |
| B  | -1.423337 | -2.057542 | 0.139669  |
| O  | -2.260590 | -1.904893 | 1.216053  |
| H  | -2.837431 | 0.414279  | -0.493044 |
| O  | -2.115944 | -2.094899 | -1.045610 |
| H  | -3.975157 | 0.079612  | 1.449045  |
| H  | -3.213501 | -0.027499 | -2.171597 |
| C  | -3.521546 | -0.170051 | -1.125512 |
| C  | -3.619934 | -1.952875 | 0.752260  |
| H  | -4.495541 | -1.193893 | 2.574089  |
| C  | -3.461169 | -1.660495 | -0.788929 |
| C  | -4.434248 | -0.915796 | 1.511229  |
| H  | -4.046601 | -3.553882 | 2.126595  |
| H  | -3.574067 | -4.124104 | 0.510263  |
| H  | -4.538718 | 0.231850  | -1.008764 |
| C  | -4.147730 | -3.355381 | 1.049264  |
| H  | -5.459551 | -0.857125 | 1.115484  |
| C  | -4.413774 | -2.437566 | -1.684192 |
| H  | -4.225938 | -2.180580 | -2.737336 |
| H  | -4.282227 | -3.521924 | -1.574244 |
| H  | -5.209080 | -3.458068 | 0.780443  |
| H  | -5.460320 | -2.185984 | -1.454530 |
| N  | -1.817115 | 4.152157  | 0.231919  |
| C  | -2.218912 | 4.915673  | -0.924445 |
| H  | -2.692601 | 5.850363  | -0.597330 |
| H  | -2.938601 | 4.377191  | -1.573998 |
| H  | -1.352663 | 5.193440  | -1.546988 |
| C  | -2.518933 | 4.379665  | 1.471554  |
| H  | -1.836435 | 4.337150  | 2.336078  |
| H  | -3.332878 | 3.647980  | 1.652137  |
| H  | -2.962872 | 5.383359  | 1.460354  |

59

Figure 3\_para-NMe2\_L-Cu-alkyl\_03 / electronic energy: -2955.32513805 a.u. / lowest freq: 19.52 cm-1

|   |           |          |           |
|---|-----------|----------|-----------|
| H | 3.008334  | 3.362081 | -0.231745 |
| H | 1.574743  | 3.186573 | 2.322982  |
| C | 2.102075  | 3.773477 | -0.699135 |
| C | 0.728485  | 3.671462 | 1.813827  |
| H | 2.114623  | 4.869844 | -0.597693 |
| H | 2.114120  | 3.509798 | -1.767199 |
| H | 0.866228  | 4.763407 | 1.843133  |
| H | -0.192008 | 3.406020 | 2.354879  |
| P | 0.616283  | 3.058621 | 0.094084  |
| C | -0.746809 | 4.052543 | -0.614626 |
| H | -0.584790 | 5.130692 | -0.461337 |
| H | -0.826484 | 3.847748 | -1.692754 |
| H | -1.694576 | 3.755113 | -0.141685 |



|    |           |           |           |
|----|-----------|-----------|-----------|
| B  | 1.905018  | -1.798342 | 0.313934  |
| O  | 2.731727  | -1.205432 | 1.239464  |
| O  | 2.572279  | -2.099570 | -0.847240 |
| C  | 3.948740  | -0.838511 | 0.569297  |
| C  | 3.970899  | -1.836060 | -0.646851 |
| C  | 5.116706  | -0.977462 | 1.532054  |
| C  | 3.793354  | 0.619475  | 0.137974  |
| C  | 4.640175  | -3.168402 | -0.312940 |
| C  | 4.558092  | -1.262106 | -1.927266 |
| H  | 4.237714  | -3.598616 | 0.616309  |
| H  | 5.729070  | -3.060458 | -0.204916 |
| H  | 4.444576  | -3.881889 | -1.126920 |
| H  | 3.988134  | -0.393137 | -2.281406 |
| H  | 4.538857  | -2.024915 | -2.719705 |
| H  | 5.604715  | -0.958554 | -1.773301 |
| H  | 2.955371  | 0.737185  | -0.566862 |
| H  | 4.707781  | 1.010638  | -0.331020 |
| H  | 3.572570  | 1.228429  | 1.027446  |
| H  | 6.071516  | -0.801063 | 1.013880  |
| H  | 5.148176  | -1.972925 | 1.993906  |
| H  | 5.026487  | -0.233190 | 2.337431  |
| C  | -2.667882 | -0.399226 | -1.225528 |
| C  | -4.051493 | -0.319400 | -1.127819 |
| C  | -1.856014 | -0.978703 | -0.227940 |
| C  | -4.738745 | -0.809566 | 0.006231  |
| C  | -2.554081 | -1.492904 | 0.876812  |
| C  | -3.944650 | -1.414427 | 0.997810  |
| C  | -0.366742 | -1.004546 | -0.368971 |
| C  | 0.371801  | -2.016207 | 0.529139  |
| H  | -4.404879 | -1.843308 | 1.888725  |
| H  | -2.002866 | -1.980427 | 1.684853  |
| H  | -4.600779 | 0.138156  | -1.951534 |
| H  | -2.188047 | 0.009847  | -2.121639 |
| Cu | 0.238652  | 0.871344  | -0.128701 |
| H  | 0.064603  | -3.064174 | 0.326465  |
| H  | 0.156858  | -1.829527 | 1.595055  |
| H  | -0.130993 | -1.237510 | -1.424729 |
| H  | -6.615088 | 0.605983  | -1.459406 |
| H  | -6.801653 | -1.125312 | -1.851172 |
| C  | -6.899515 | -0.373094 | -1.042083 |
| H  | -7.961192 | -0.307195 | -0.769969 |
| N  | -6.122967 | -0.695888 | 0.131290  |
| H  | -6.651109 | -2.528553 | 1.099559  |
| H  | -7.857720 | -1.214696 | 1.162154  |
| C  | -6.781468 | -1.430365 | 1.184310  |
| H  | -6.411377 | -1.127266 | 2.177019  |

59

Figure 3 para-NMe<sub>2</sub>-ts(BHE) / electronic energy: -2955.27529180 a.u. / lowest freq: -965.54 cm<sup>-1</sup>

|    |           |           |           |
|----|-----------|-----------|-----------|
| H  | 0.891234  | -4.295333 | 1.979147  |
| H  | 2.931756  | -2.320334 | 1.177043  |
| C  | 0.705113  | -4.477442 | 0.910384  |
| C  | 2.690426  | -2.554243 | 0.129560  |
| H  | 1.403246  | -5.247391 | 0.546537  |
| H  | -0.326810 | -4.842515 | 0.798744  |
| H  | 3.299972  | -3.410442 | -0.198976 |
| H  | 2.936340  | -1.672862 | -0.482393 |
| P  | 0.902710  | -2.913196 | -0.015411 |
| C  | 0.709021  | -3.429490 | -1.758689 |
| H  | 1.382591  | -4.262220 | -2.013712 |
| H  | -0.332424 | -3.735799 | -1.937349 |
| H  | 0.928363  | -2.568274 | -2.407179 |
| B  | -2.473215 | 0.904149  | 0.317067  |
| O  | -3.402364 | 1.481001  | 1.137643  |
| O  | -3.024796 | 0.363998  | -0.812426 |
| C  | -4.703719 | 1.090114  | 0.654197  |
| C  | -4.408928 | 0.762442  | -0.856144 |
| C  | -5.686044 | 2.227747  | 0.875854  |
| C  | -5.123593 | -0.139159 | 1.458340  |
| C  | -4.491780 | 1.989639  | -1.761359 |
| C  | -5.237796 | -0.373628 | -1.432441 |
| H  | -3.916847 | 2.832665  | -1.350372 |
| H  | -5.531680 | 2.314660  | -1.908995 |
| H  | -4.067025 | 1.737639  | -2.744043 |
| H  | -5.054911 | -1.318804 | -0.904851 |
| H  | -4.983579 | -0.522624 | -2.492365 |
| H  | -6.311491 | -0.139716 | -1.371529 |
| H  | -4.426553 | -0.976515 | 1.302981  |
| H  | -6.136874 | -0.472026 | 1.191462  |
| H  | -5.115129 | 0.112303  | 2.529104  |
| H  | -6.659770 | 1.990822  | 0.421415  |
| H  | -5.319596 | 3.170030  | 0.447765  |
| H  | -5.843078 | 2.382786  | 1.953459  |
| C  | 2.273228  | 1.145272  | -1.418655 |
| C  | 3.644974  | 1.340965  | -1.307433 |
| C  | 1.424857  | 1.015575  | -0.297253 |
| C  | 4.281542  | 1.418713  | -0.048400 |
| C  | 2.067973  | 1.115650  | 0.954954  |
| C  | 3.443173  | 1.314567  | 1.078754  |
| C  | -0.002623 | 0.750968  | -0.452051 |
| C  | -0.949106 | 0.828348  | 0.648100  |
| H  | 3.862083  | 1.384695  | 2.083402  |
| H  | 1.481300  | 1.027869  | 1.874063  |
| H  | 4.225192  | 1.435472  | -2.226154 |
| H  | 1.835004  | 1.084740  | -2.420046 |
| Cu | -0.237320 | -1.096393 | 0.462868  |
| H  | -0.659516 | 1.432901  | 1.518824  |
| H  | -1.189828 | -0.376521 | 1.566431  |

|   |           |          |           |
|---|-----------|----------|-----------|
| H | -0.399870 | 0.722079 | -1.470993 |
| H | 6.347386  | 1.186073 | -1.888102 |
| H | 6.088632  | 2.918485 | -1.550652 |
| C | 6.415668  | 1.957756 | -1.103647 |
| H | 7.476812  | 2.053132 | -0.839179 |
| N | 5.660033  | 1.589770 | 0.068717  |
| H | 5.815809  | 2.874549 | 1.771183  |
| H | 7.299726  | 2.015026 | 1.278660  |
| C | 6.209020  | 1.922346 | 1.360010  |
| H | 6.005854  | 1.132809 | 2.102082  |

59

Figure 3\_para-NMe2\_pc2 / electronic energy: -2955.31547918 a.u. / lowest freq: 26.79 cm<sup>-1</sup>

|    |           |           |           |
|----|-----------|-----------|-----------|
| H  | 0.405099  | -4.327440 | 1.537649  |
| H  | 2.703392  | -2.449207 | 1.432521  |
| C  | 0.308557  | -4.232430 | 0.445796  |
| C  | 2.564980  | -2.467706 | 0.341240  |
| H  | 0.937700  | -4.992717 | -0.042657 |
| H  | -0.745609 | -4.408251 | 0.183818  |
| H  | 3.094041  | -3.338571 | -0.076391 |
| H  | 2.999243  | -1.547397 | -0.076560 |
| P  | 0.778518  | -2.535450 | -0.049426 |
| C  | 0.764547  | -2.621663 | -1.877589 |
| H  | 1.369819  | -3.462954 | -2.249643 |
| H  | -0.271391 | -2.739264 | -2.229901 |
| H  | 1.164234  | -1.683918 | -2.291185 |
| B  | -2.396279 | 1.005701  | 0.214685  |
| O  | -3.374706 | 1.532315  | 1.015464  |
| O  | -2.905922 | 0.369654  | -0.891311 |
| C  | -4.634892 | 1.004899  | 0.559248  |
| C  | -4.318193 | 0.638392  | -0.938446 |
| C  | -5.713496 | 2.060715  | 0.738178  |
| C  | -4.943655 | -0.219621 | 1.418132  |
| C  | -4.521719 | 1.809690  | -1.898341 |
| C  | -5.043649 | -0.593540 | -1.455240 |
| H  | -4.026661 | 2.721634  | -1.532886 |
| H  | -5.588690 | 2.027847  | -2.050575 |
| H  | -4.081127 | 1.553144  | -2.872974 |
| H  | -4.775494 | -1.491742 | -0.883634 |
| H  | -4.779446 | -0.769513 | -2.508709 |
| H  | -6.133569 | -0.452230 | -1.399096 |
| H  | -4.166502 | -0.991115 | 1.310159  |
| H  | -5.919145 | -0.658855 | 1.165075  |
| H  | -4.966298 | 0.081839  | 2.475738  |
| H  | -6.666192 | 1.715984  | 0.308276  |
| H  | -5.437581 | 3.010924  | 0.262460  |
| H  | -5.874542 | 2.251681  | 1.809445  |
| C  | 2.358796  | 0.861640  | -1.412297 |
| C  | 3.738253  | 1.013833  | -1.335234 |
| C  | 1.537140  | 0.911887  | -0.278216 |
| C  | 4.378756  | 1.225721  | -0.090817 |
| C  | 2.173578  | 1.115353  | 0.957017  |
| C  | 3.549095  | 1.266048  | 1.057709  |
| C  | 0.081297  | 0.707809  | -0.404475 |
| C  | -0.880019 | 1.125988  | 0.505270  |
| H  | 3.983640  | 1.412517  | 2.046180  |
| H  | 1.580505  | 1.137672  | 1.875512  |
| H  | 4.317726  | 0.970819  | -2.257218 |
| H  | 1.902656  | 0.701783  | -2.393844 |
| Cu | -0.493057 | -0.879058 | 0.897437  |
| H  | -0.562997 | 1.674850  | 1.399865  |
| H  | -1.326090 | -1.285159 | 2.199561  |
| H  | -0.255440 | 0.378640  | -1.395612 |
| H  | 6.477470  | 0.384200  | -1.719695 |
| H  | 6.267480  | 2.145812  | -1.909005 |
| C  | 6.550206  | 1.352799  | -1.193768 |
| H  | 7.601959  | 1.507332  | -0.925647 |
| N  | 5.739220  | 1.383111  | 0.000995  |
| H  | 5.982064  | 2.540799  | 1.764549  |
| H  | 7.439348  | 1.727468  | 1.153921  |
| C  | 6.356324  | 1.618306  | 1.285857  |
| H  | 6.187716  | 0.783050  | 1.988448  |

59

Figure 3\_para-NMe2\_ts(H>B) / electronic energy: -2955.30163554 a.u. / lowest freq: -466.10 cm<sup>-1</sup>

|   |           |           |           |
|---|-----------|-----------|-----------|
| H | 0.354752  | 4.505612  | -1.535751 |
| H | 2.408665  | 2.324712  | -1.728123 |
| C | 0.445977  | 4.444191  | -0.440990 |
| C | 2.457691  | 2.412583  | -0.632548 |
| H | 1.245693  | 5.122696  | -0.105713 |
| H | -0.510309 | 4.764923  | -0.001364 |
| H | 3.143638  | 3.231741  | -0.366170 |
| H | 2.851656  | 1.468095  | -0.228685 |
| P | 0.782735  | 2.712746  | 0.041083  |
| C | 1.086240  | 2.827651  | 1.840544  |
| H | 1.859695  | 3.576923  | 2.070050  |
| H | 0.153807  | 3.101134  | 2.356454  |
| H | 1.413597  | 1.846278  | 2.215217  |
| B | -2.377181 | -0.589122 | -0.406342 |
| O | -3.349495 | -1.142288 | -1.257030 |
| O | -2.916631 | -0.412099 | 0.887348  |
| C | -4.616637 | -0.960588 | -0.629175 |
| C | -4.230998 | -0.963108 | 0.896868  |
| C | -5.542344 | -2.094558 | -1.048291 |
| C | -5.205814 | 0.376494  | -1.085873 |
| C | -4.132531 | -2.377746 | 1.474312  |
| C | -5.132291 | -0.108351 | 1.777286  |
| H | -3.506838 | -3.022401 | 0.838899  |
| H | -5.119420 | -2.850498 | 1.590620  |

|    |           |           |           |
|----|-----------|-----------|-----------|
| H  | -3.659340 | -2.322394 | 2.466239  |
| H  | -5.095325 | 0.949644  | 1.485199  |
| H  | -4.806869 | -0.179583 | 2.826557  |
| H  | -6.176980 | -0.452361 | 1.723471  |
| H  | -4.574624 | 1.220783  | -0.774935 |
| H  | -6.220654 | 0.531187  | -0.690207 |
| H  | -5.260645 | 0.384722  | -2.185072 |
| H  | -6.493875 | -2.051515 | -0.495928 |
| H  | -5.081203 | -3.076714 | -0.879224 |
| H  | -5.769949 | -2.010976 | -2.122015 |
| C  | 2.384722  | -0.964350 | 1.347285  |
| C  | 3.765292  | -1.109959 | 1.271985  |
| C  | 1.561988  | -1.014838 | 0.213580  |
| C  | 4.406566  | -1.322718 | 0.028884  |
| C  | 2.200596  | -1.216300 | -1.019884 |
| C  | 3.576326  | -1.366597 | -1.119622 |
| C  | 0.108123  | -0.812561 | 0.356134  |
| C  | -0.855859 | -0.970380 | -0.601131 |
| H  | 4.011572  | -1.517341 | -2.107271 |
| H  | 1.610549  | -1.243481 | -1.939716 |
| H  | 4.343732  | -1.063937 | 2.194505  |
| H  | 1.927210  | -0.806565 | 2.328824  |
| Cu | -0.746881 | 1.159372  | -0.505836 |
| H  | -0.539602 | -1.257218 | -1.614651 |
| H  | -2.268724 | 1.048273  | -1.040417 |
| H  | -0.221163 | -0.606293 | 1.383972  |
| H  | 6.292505  | -2.250720 | 1.846150  |
| H  | 7.628671  | -1.607793 | 0.867426  |
| C  | 6.576297  | -1.454967 | 1.134146  |
| H  | 6.502337  | -0.488523 | 1.663649  |
| N  | 5.767508  | -1.480029 | -0.062219 |
| H  | 7.466999  | -1.840342 | -1.210939 |
| H  | 6.008396  | -2.657444 | -1.813514 |
| C  | 6.384158  | -1.730575 | -1.344168 |
| H  | 6.217920  | -0.902613 | -2.055878 |

59

Figure 3 para-NMe2\_int1 / electronic energy: -2955.30314274 a.u. / lowest freq: 19.51 cm-1

|    |           |           |           |
|----|-----------|-----------|-----------|
| H  | 0.394133  | 4.553647  | -1.642897 |
| H  | 2.334127  | 2.252253  | -1.771313 |
| C  | 0.547199  | 4.568904  | -0.553445 |
| C  | 2.449973  | 2.421374  | -0.690589 |
| H  | 1.397435  | 5.226700  | -0.314712 |
| H  | -0.364617 | 4.970220  | -0.086627 |
| H  | 3.194489  | 3.215587  | -0.525164 |
| H  | 2.810408  | 1.487286  | -0.233438 |
| P  | 0.833863  | 2.864703  | 0.043141  |
| C  | 1.237191  | 3.093067  | 1.811884  |
| H  | 2.063770  | 3.807775  | 1.946519  |
| H  | 0.349270  | 3.459691  | 2.347847  |
| H  | 1.524508  | 2.122623  | 2.243431  |
| B  | -2.408544 | -0.307190 | -0.353943 |
| O  | -3.350460 | -0.825480 | -1.311028 |
| O  | -2.992234 | -0.460699 | 0.961401  |
| C  | -4.606220 | -0.904736 | -0.663461 |
| C  | -4.190062 | -1.203153 | 0.823632  |
| C  | -5.436841 | -1.999193 | -1.322088 |
| C  | -5.332193 | 0.439364  | -0.800631 |
| C  | -3.869157 | -2.686452 | 1.042464  |
| C  | -5.197577 | -0.738169 | 1.868423  |
| H  | -3.178616 | -3.056258 | 0.269773  |
| H  | -4.771107 | -3.317939 | 1.039653  |
| H  | -3.373912 | -2.802253 | 2.018603  |
| H  | -5.343631 | 0.349887  | 1.829723  |
| H  | -4.835902 | -0.991395 | 2.877261  |
| H  | -6.173842 | -1.228728 | 1.727492  |
| H  | -4.785895 | 1.245629  | -0.289045 |
| H  | -6.354229 | 0.400617  | -0.394087 |
| H  | -5.398333 | 0.700313  | -1.868078 |
| H  | -6.378942 | -2.169048 | -0.777389 |
| H  | -4.883350 | -2.946574 | -1.372655 |
| H  | -5.690885 | -1.706772 | -2.352976 |
| C  | 2.358748  | -1.037972 | 1.348484  |
| C  | 3.734004  | -1.219327 | 1.253403  |
| C  | 1.519178  | -1.057777 | 0.226120  |
| C  | 4.352590  | -1.439738 | 0.000350  |
| C  | 2.135923  | -1.272153 | -1.016436 |
| C  | 3.505551  | -1.457424 | -1.136388 |
| C  | 0.074735  | -0.801333 | 0.387457  |
| C  | -0.891589 | -0.808490 | -0.570896 |
| H  | 3.923129  | -1.617738 | -2.130231 |
| H  | 1.533099  | -1.284893 | -1.928222 |
| H  | 4.326495  | -1.194313 | 2.167883  |
| H  | 1.919121  | -0.872691 | 2.336998  |
| Cu | -0.752930 | 1.328292  | -0.296610 |
| H  | -0.581212 | -1.026874 | -1.604702 |
| H  | -2.372912 | 1.100632  | -0.581703 |
| H  | -0.238310 | -0.633643 | 1.428224  |
| H  | 6.244471  | -2.418747 | 1.784733  |
| H  | 7.579679  | -1.803459 | 0.787747  |
| C  | 6.535540  | -1.626724 | 1.071681  |
| H  | 6.493201  | -0.661260 | 1.606544  |
| N  | 5.707850  | -1.628280 | -0.111893 |
| H  | 7.384055  | -2.000114 | -1.290911 |
| H  | 5.904012  | -2.786252 | -1.881770 |
| C  | 6.301248  | -1.871674 | -1.406195 |
| H  | 6.137183  | -1.031937 | -2.104555 |

59

Figure 3 para-NMe2\_ts(Cu>O) / electronic energy: -2955.29561577 a.u. / lowest freq: -37.84 cm<sup>-1</sup>

|    |           |           |           |
|----|-----------|-----------|-----------|
| H  | -1.029215 | 4.835624  | -1.303232 |
| H  | 1.219430  | 3.020538  | -1.834503 |
| C  | -0.850533 | 4.686205  | -0.228053 |
| C  | 1.347714  | 2.903216  | -0.748319 |
| H  | -0.103239 | 5.415969  | 0.119802  |
| H  | -1.798639 | 4.856338  | 0.303301  |
| H  | 2.019778  | 3.690844  | -0.373964 |
| H  | 1.802991  | 1.918119  | -0.563192 |
| P  | -0.287706 | 2.972971  | 0.065369  |
| C  | 0.127812  | 2.960302  | 1.845301  |
| H  | 0.827982  | 3.770900  | 2.099670  |
| H  | -0.792555 | 3.073271  | 2.437043  |
| H  | 0.585970  | 1.993358  | 2.101336  |
| B  | -1.988916 | -0.914376 | -0.816358 |
| O  | -2.949409 | -1.899656 | -1.208858 |
| O  | -2.357125 | -0.495792 | 0.550574  |
| C  | -4.119576 | -1.685444 | -0.436313 |
| C  | -3.535661 | -1.188463 | 0.939663  |
| C  | -4.900320 | -2.990801 | -0.345913 |
| C  | -4.991411 | -0.621106 | -1.115570 |
| C  | -3.103206 | -2.349557 | 1.838531  |
| C  | -4.448113 | -0.246578 | 1.714270  |
| H  | -2.458767 | -3.049293 | 1.286640  |
| H  | -3.961435 | -2.903900 | 2.247586  |
| H  | -2.522276 | -1.949280 | 2.683286  |
| H  | -4.641421 | 0.677744  | 1.152659  |
| H  | -3.973822 | 0.033633  | 2.667489  |
| H  | -5.412902 | -0.725052 | 1.944521  |
| H  | -4.490811 | 0.357026  | -1.145639 |
| H  | -5.960650 | -0.499641 | -0.609417 |
| H  | -5.182812 | -0.930727 | -2.154257 |
| H  | -5.734414 | -2.904643 | 0.367911  |
| H  | -4.254100 | -3.821248 | -0.031558 |
| H  | -5.321083 | -3.246022 | -1.330510 |
| C  | 2.641910  | -0.988802 | 1.205205  |
| C  | 4.031664  | -0.967395 | 1.237951  |
| C  | 1.916841  | -1.051380 | 0.005725  |
| C  | 4.787112  | -1.003139 | 0.042642  |
| C  | 2.670859  | -1.080670 | -1.178998 |
| C  | 4.058886  | -1.057491 | -1.171737 |
| C  | 0.443855  | -1.038986 | 0.037134  |
| C  | -0.421334 | -1.198471 | -0.983558 |
| H  | 4.583585  | -1.079343 | -2.126800 |
| H  | 2.159233  | -1.113103 | -2.144569 |
| H  | 4.529254  | -0.920085 | 2.206305  |
| H  | 2.096035  | -0.955888 | 2.153364  |
| Cu | -1.568217 | 1.292162  | -0.574381 |
| H  | -0.016498 | -1.386536 | -1.989079 |
| H  | -2.207413 | 0.188195  | -1.656781 |
| H  | 0.012041  | -0.851350 | 1.029208  |
| H  | 6.674422  | -0.154010 | -1.832486 |
| H  | 7.972288  | -1.012088 | -0.972864 |
| C  | 6.896657  | -1.022198 | -1.186080 |
| H  | 6.681251  | -1.936891 | -1.766731 |
| H  | 6.622531  | -0.007148 | 1.886070  |
| N  | 6.160990  | -0.980814 | 0.055886  |
| H  | 7.949340  | -0.905879 | 1.121113  |
| C  | 6.869666  | -0.918582 | 1.312289  |
| H  | 6.652783  | -1.789504 | 1.956642  |

59

Figure 3 para-NMe2\_int2 / electronic energy: -2955.30214865 a.u. / lowest freq: 23.78 cm<sup>-1</sup>

|   |           |           |           |
|---|-----------|-----------|-----------|
| H | 4.284078  | -3.066870 | -2.250525 |
| H | 2.663405  | -4.293477 | -0.129878 |
| C | 4.959166  | -2.677467 | -1.474152 |
| C | 3.389322  | -3.895132 | 0.594460  |
| H | 5.733716  | -3.428252 | -1.253798 |
| H | 5.437645  | -1.765675 | -1.861647 |
| H | 4.218464  | -4.610393 | 0.708501  |
| H | 2.878004  | -3.774897 | 1.561124  |
| P | 3.989146  | -2.267813 | 0.019481  |
| C | 5.275677  | -1.830951 | 1.244152  |
| H | 6.022755  | -2.633850 | 1.342494  |
| H | 5.781697  | -0.906588 | 0.927786  |
| H | 4.805203  | -1.651080 | 2.222136  |
| B | 0.780740  | 0.869769  | -0.856132 |
| O | 1.237287  | 2.157874  | -1.331484 |
| O | 1.297807  | 0.773480  | 0.551766  |
| C | 2.236785  | 2.657663  | -0.470388 |
| C | 1.840924  | 2.039166  | 0.921631  |
| C | 2.202387  | 4.181801  | -0.499289 |
| C | 3.616773  | 2.184206  | -0.949854 |
| C | 0.733312  | 2.832598  | 1.617038  |
| C | 3.005331  | 1.823080  | 1.877909  |
| H | -0.104411 | 3.024622  | 0.931272  |
| H | 1.098552  | 3.794540  | 2.007096  |
| H | 0.351203  | 2.245048  | 2.465229  |
| H | 3.738287  | 1.115809  | 1.462754  |
| H | 2.639263  | 1.405107  | 2.828307  |
| H | 3.518083  | 2.771951  | 2.098025  |
| H | 3.732131  | 1.089267  | -0.877807 |
| H | 4.435392  | 2.645936  | -0.377539 |
| H | 3.737246  | 2.456376  | -2.008899 |
| H | 2.883821  | 4.611492  | 0.251805  |
| H | 1.188563  | 4.560798  | -0.314376 |
| H | 2.519313  | 4.543729  | -1.489447 |
| C | -3.737418 | -0.249673 | 1.174755  |

|    |           |           |           |
|----|-----------|-----------|-----------|
| C  | -5.105534 | -0.496876 | 1.215393  |
| C  | -3.055695 | 0.027500  | -0.019377 |
| C  | -5.882148 | -0.480641 | 0.033981  |
| C  | -3.831323 | 0.039856  | -1.190369 |
| C  | -5.198155 | -0.204331 | -1.175431 |
| C  | -1.602447 | 0.285642  | 0.005885  |
| C  | -0.792532 | 0.618628  | -1.013506 |
| H  | -5.739512 | -0.181263 | -2.121396 |
| H  | -3.354193 | 0.244169  | -2.152621 |
| H  | -5.570104 | -0.701734 | 2.179849  |
| H  | -3.175289 | -0.270372 | 2.113824  |
| Cu | 2.407772  | -0.765086 | -0.290416 |
| H  | -1.232629 | 0.718891  | -2.017494 |
| H  | 1.371810  | -0.120877 | -1.544512 |
| H  | -1.145030 | 0.193622  | 1.000527  |
| H  | -7.645478 | -1.460290 | -1.894295 |
| H  | -9.048355 | -0.905437 | -0.955853 |
| C  | -7.993585 | -0.698778 | -1.173168 |
| H  | -7.942409 | 0.283978  | -1.674884 |
| H  | -7.494012 | -1.930097 | 1.782685  |
| N  | -7.236074 | -0.721431 | 0.055712  |
| H  | -8.964637 | -1.183623 | 1.121779  |
| C  | -7.895990 | -1.018453 | 1.304517  |
| H  | -7.806208 | -0.192542 | 2.032922  |

59

Figure 3\_para-NMe2\_ts(C-Brot) / electronic energy: -2955.29669845 a.u. / lowest freq: -78.52 cm-1

|    |           |           |           |
|----|-----------|-----------|-----------|
| H  | 4.120289  | -3.689341 | -1.650676 |
| H  | 3.056738  | -4.069270 | 1.075326  |
| C  | 4.912793  | -3.071486 | -1.203206 |
| C  | 3.863309  | -3.418231 | 1.443588  |
| H  | 5.742108  | -3.720666 | -0.882257 |
| H  | 5.275566  | -2.371401 | -1.970478 |
| H  | 4.754946  | -4.029058 | 1.653261  |
| H  | 3.522133  | -2.942270 | 2.374853  |
| P  | 4.223751  | -2.126633 | 0.201646  |
| C  | 5.690329  | -1.279712 | 0.894647  |
| H  | 6.502734  | -1.994921 | 1.097676  |
| H  | 6.049951  | -0.522165 | 0.182351  |
| H  | 5.414159  | -0.773024 | 1.831169  |
| B  | 0.722961  | 0.635462  | -0.771885 |
| O  | 0.908199  | 1.943285  | -1.348472 |
| O  | 1.379842  | 0.732439  | 0.584458  |
| C  | 1.990918  | 2.590390  | -0.715613 |
| C  | 1.904962  | 2.046865  | 0.760981  |
| C  | 1.802935  | 4.099108  | -0.833635 |
| C  | 3.303916  | 2.203604  | -1.412239 |
| C  | 0.910992  | 2.834864  | 1.614587  |
| C  | 3.243017  | 1.958320  | 1.484242  |
| H  | -0.047312 | 2.959712  | 1.091240  |
| H  | 1.295270  | 3.831189  | 1.879588  |
| H  | 0.719713  | 2.281798  | 2.546280  |
| H  | 3.939889  | 1.290033  | 0.958103  |
| H  | 3.095042  | 1.555349  | 2.498187  |
| H  | 3.713101  | 2.949582  | 1.577020  |
| H  | 3.525303  | 1.128238  | -1.317806 |
| H  | 4.164223  | 2.762052  | -1.014523 |
| H  | 3.211901  | 2.424930  | -2.485956 |
| H  | 2.563819  | 4.644047  | -0.253251 |
| H  | 0.807576  | 4.407993  | -0.488074 |
| H  | 1.899306  | 4.402568  | -1.887313 |
| C  | -4.173133 | 0.995042  | 0.605257  |
| C  | -5.514140 | 0.635744  | 0.687606  |
| C  | -3.224502 | 0.218621  | -0.076384 |
| C  | -5.986697 | -0.552714 | 0.084681  |
| C  | -3.699254 | -0.959913 | -0.675030 |
| C  | -5.032170 | -1.340940 | -0.604415 |
| C  | -1.816840 | 0.659235  | -0.137227 |
| C  | -0.789597 | 0.077925  | -0.779146 |
| H  | -5.332795 | -2.266558 | -1.095128 |
| H  | -3.007278 | -1.606704 | -1.220748 |
| H  | -6.195710 | 1.289580  | 1.231561  |
| H  | -3.850145 | 1.922682  | 1.087901  |
| Cu | 2.530641  | -0.798620 | -0.257003 |
| H  | -1.004461 | -0.845783 | -1.337746 |
| H  | 1.424290  | -0.281457 | -1.473128 |
| H  | -1.620373 | 1.582502  | 0.424372  |
| H  | -7.239618 | -3.013039 | -0.194103 |
| H  | -8.834550 | -2.252445 | -0.339510 |
| C  | -7.765705 | -2.105430 | -0.536316 |
| H  | -7.630012 | -2.031187 | -1.631463 |
| H  | -8.046153 | 0.152640  | 1.830532  |
| N  | -7.308762 | -0.925258 | 0.159510  |
| H  | -9.267485 | -0.492634 | 0.717097  |
| C  | -8.271455 | -0.036597 | 0.766711  |
| H  | -8.322885 | 0.942043  | 0.254478  |

59

Figure 3\_para-NMe2\_int3 / electronic energy: -2955.30153963 a.u. / lowest freq: 19.79 cm-1

|   |          |           |           |
|---|----------|-----------|-----------|
| H | 4.550200 | -3.031514 | -2.203556 |
| H | 3.903556 | -4.050734 | 0.483112  |
| C | 5.278219 | -2.349396 | -1.740014 |
| C | 4.667572 | -3.361828 | 0.872892  |
| H | 6.249562 | -2.859947 | -1.650760 |
| H | 5.388819 | -1.471261 | -2.393330 |
| H | 5.652134 | -3.852490 | 0.829112  |
| H | 4.422681 | -3.133252 | 1.920813  |
| P | 4.653856 | -1.818320 | -0.106056 |
| C | 6.054411 | -0.866803 | 0.585470  |

|    |           |           |           |
|----|-----------|-----------|-----------|
| H  | 6.989289  | -1.447776 | 0.551780  |
| H  | 6.186850  | 0.062149  | 0.010920  |
| H  | 5.834721  | -0.599693 | 1.629830  |
| B  | 0.655260  | 0.376145  | -0.422724 |
| O  | 0.713706  | 1.665984  | -1.068726 |
| O  | 1.470561  | 0.542443  | 0.839975  |
| C  | 1.683526  | 2.482411  | -0.451091 |
| C  | 1.725949  | 1.932709  | 1.022993  |
| C  | 1.246366  | 3.939979  | -0.552203 |
| C  | 3.025986  | 2.316740  | -1.176610 |
| C  | 0.599992  | 2.500254  | 1.889576  |
| C  | 3.063942  | 2.107861  | 1.727616  |
| H  | -0.371705 | 2.405002  | 1.384047  |
| H  | 0.767050  | 3.557930  | 2.141803  |
| H  | 0.549267  | 1.927165  | 2.827594  |
| H  | 3.865309  | 1.562804  | 1.207863  |
| H  | 3.002824  | 1.714487  | 2.754051  |
| H  | 3.343653  | 3.170915  | 1.787847  |
| H  | 3.432258  | 1.296411  | -1.071053 |
| H  | 3.786751  | 3.023212  | -0.812213 |
| H  | 2.870692  | 2.498313  | -2.250392 |
| H  | 1.914103  | 4.598480  | 0.024998  |
| H  | 0.219048  | 4.074132  | -0.187845 |
| H  | 1.274473  | 4.265426  | -1.603433 |
| C  | -4.381893 | 0.931180  | -0.772669 |
| C  | -5.727118 | 0.617435  | -0.611888 |
| C  | -3.351760 | 0.072125  | -0.361546 |
| C  | -6.122644 | -0.602351 | -0.016072 |
| C  | -3.750149 | -1.142188 | 0.221264  |
| C  | -5.086549 | -1.478031 | 0.392265  |
| C  | -1.943612 | 0.474004  | -0.545081 |
| C  | -0.828261 | -0.185376 | -0.188907 |
| H  | -5.325344 | -2.437332 | 0.851554  |
| H  | -2.993163 | -1.856261 | 0.556378  |
| H  | -6.473347 | 1.334509  | -0.953966 |
| H  | -4.120841 | 1.887531  | -1.236393 |
| Cu | 2.724224  | -0.769001 | -0.148487 |
| H  | -0.936903 | -1.166435 | 0.299327  |
| H  | 1.287324  | -0.561675 | -1.139398 |
| H  | -1.812010 | 1.450536  | -1.030813 |
| H  | -7.389397 | -2.302356 | 1.771554  |
| H  | -8.903716 | -2.245707 | 0.847743  |
| C  | -7.812315 | -2.186356 | 0.758053  |
| H  | -7.477639 | -3.050353 | 0.154947  |
| H  | -8.423807 | 0.960615  | 0.195160  |
| N  | -7.447958 | -0.923712 | 0.160705  |
| H  | -9.461326 | -0.453913 | -0.087907 |
| C  | -8.476280 | -0.023327 | -0.304021 |
| H  | -8.418712 | 0.150505  | -1.393878 |

44

Figure 3\_para-NMe2-alkenylBpin / electronic energy: -853.456934437 a.u. / lowest freq: 23.23 cm<sup>-1</sup>

|   |           |           |           |
|---|-----------|-----------|-----------|
| B | -2.187170 | -0.365211 | 0.009480  |
| O | -3.150062 | -1.308190 | 0.256850  |
| O | -2.719971 | 0.871376  | -0.253825 |
| C | -4.429772 | -0.720739 | -0.045141 |
| C | -4.122547 | 0.819094  | 0.064576  |
| C | -5.461729 | -1.234491 | 0.945780  |
| C | -4.799537 | -1.155667 | -1.462554 |
| C | -4.280376 | 1.361085  | 1.484676  |
| C | -4.893795 | 1.689895  | -0.914167 |
| H | -3.742396 | 0.739095  | 2.215571  |
| H | -5.337156 | 1.416990  | 1.783044  |
| H | -3.856508 | 2.375071  | 1.528609  |
| H | -4.661526 | 1.436198  | -1.956775 |
| H | -4.636808 | 2.747934  | -0.756642 |
| H | -5.977402 | 1.578257  | -0.758380 |
| H | -4.071062 | -0.786727 | -2.199959 |
| H | -5.798937 | -0.798203 | -1.749417 |
| H | -4.801313 | -2.254633 | -1.510976 |
| H | -6.427272 | -0.727499 | 0.798153  |
| H | -5.140704 | -1.082014 | 1.984379  |
| H | -5.619453 | -2.312545 | 0.794328  |
| C | 2.524789  | 1.319156  | -0.116960 |
| C | 3.911059  | 1.255250  | -0.091630 |
| C | 1.719306  | 0.170822  | -0.054482 |
| C | 4.579018  | 0.009600  | -0.003909 |
| C | 2.385000  | -1.064718 | 0.028476  |
| C | 3.767329  | -1.153399 | 0.052138  |
| C | 0.259119  | 0.304712  | -0.075142 |
| C | -0.668799 | -0.668118 | 0.038170  |
| H | 4.224495  | -2.140270 | 0.117856  |
| H | 1.807980  | -1.991876 | 0.074166  |
| H | 4.477072  | 2.184934  | -0.144841 |
| H | 2.045955  | 2.300298  | -0.188373 |
| H | -0.341817 | -1.706766 | 0.171089  |
| H | -0.096635 | 1.336458  | -0.193713 |
| H | 6.587387  | 1.699032  | -0.957837 |
| H | 6.513293  | 1.810645  | 0.822063  |
| C | 6.741153  | 1.134989  | -0.020836 |
| H | 7.804145  | 0.873333  | 0.040392  |
| N | 5.945699  | -0.071055 | 0.023558  |
| H | 6.334805  | -1.911285 | 1.011367  |
| H | 7.683963  | -1.215909 | 0.088537  |
| C | 6.597253  | -1.359645 | 0.091378  |
| H | 6.341286  | -1.999507 | -0.771386 |

59

Figure 3\_para-NMe2\_pc2\_rev / electronic energy: -2955.31296303 a.u. / lowest freq: 21.29 cm<sup>-1</sup>

|    |           |           |           |
|----|-----------|-----------|-----------|
| H  | -0.783698 | 4.066132  | -1.075681 |
| H  | 1.870100  | 3.574211  | -2.230537 |
| C  | -0.342588 | 3.934881  | -0.076336 |
| C  | 2.248318  | 3.491723  | -1.200670 |
| H  | 0.036425  | 4.903561  | 0.285749  |
| H  | -1.135605 | 3.581582  | 0.600037  |
| H  | 2.489384  | 4.496460  | -0.819951 |
| H  | 3.165753  | 2.885732  | -1.220087 |
| P  | 0.982293  | 2.674483  | -0.163804 |
| C  | 1.706941  | 2.728852  | 1.515391  |
| H  | 2.120011  | 3.721628  | 1.752315  |
| H  | 0.924409  | 2.482772  | 2.249346  |
| H  | 2.492039  | 1.963698  | 1.597529  |
| B  | 1.858086  | -0.976205 | 0.479137  |
| O  | 2.852081  | -0.462483 | 1.276217  |
| O  | 2.347444  | -1.816214 | -0.487549 |
| C  | 4.109751  | -0.772323 | 0.643990  |
| C  | 3.742133  | -2.039377 | -0.209852 |
| C  | 5.164813  | -1.003452 | 1.712340  |
| C  | 4.483544  | 0.430085  | -0.221866 |
| C  | 3.842491  | -3.341440 | 0.583216  |
| C  | 4.496223  | -2.163938 | -1.523349 |
| H  | 3.319257  | -3.267528 | 1.548361  |
| H  | 4.889487  | -3.617470 | 0.774202  |
| H  | 3.373408  | -4.150670 | 0.004691  |
| H  | 4.295108  | -1.314387 | -2.188731 |
| H  | 4.185232  | -3.081379 | -2.044446 |
| H  | 5.580281  | -2.225824 | -1.344581 |
| H  | 3.725430  | 0.610570  | -0.999468 |
| H  | 5.457803  | 0.290225  | -0.711641 |
| H  | 4.547774  | 1.327521  | 0.411157  |
| H  | 6.110664  | -1.332062 | 1.256087  |
| H  | 4.845753  | -1.758101 | 2.442644  |
| H  | 5.356817  | -0.065881 | 2.254835  |
| C  | -2.947238 | -1.767450 | -0.814629 |
| C  | -4.325510 | -1.642926 | -0.705981 |
| C  | -2.065220 | -0.989170 | -0.051634 |
| C  | -4.905403 | -0.709133 | 0.186731  |
| C  | -2.640273 | -0.060543 | 0.830237  |
| C  | -4.014903 | 0.082771  | 0.953572  |
| C  | -0.607828 | -1.141683 | -0.217342 |
| C  | 0.357568  | -0.631249 | 0.639947  |
| H  | -4.398078 | 0.826375  | 1.652023  |
| H  | -1.997660 | 0.587631  | 1.431961  |
| H  | -4.955560 | -2.277220 | -1.328849 |
| H  | -2.539463 | -2.493064 | -1.524378 |
| Cu | 0.108486  | 0.709906  | -0.955726 |
| H  | 0.042635  | -0.094870 | 1.542602  |
| H  | -0.493394 | 0.820019  | -2.438453 |
| H  | -0.299213 | -1.870662 | -0.974409 |
| H  | -7.004667 | -2.455070 | -0.347416 |
| H  | -8.185060 | -1.129603 | -0.294539 |
| C  | -7.141468 | -1.373891 | -0.525490 |
| H  | -6.983019 | -1.187397 | -1.602816 |
| N  | -6.266353 | -0.574329 | 0.300451  |
| H  | -6.527093 | 0.215843  | 2.252739  |
| H  | -7.919818 | 0.354587  | 1.161267  |
| C  | -6.825161 | 0.402407  | 1.205961  |
| H  | -6.525245 | 1.434158  | 0.947957  |

59

Figure 3\_para-NMe2\_ts(CuHadd\_rev) / electronic energy: -2955.28486892 a.u. / lowest freq: -860.20 cm<sup>-1</sup>

|   |           |           |           |
|---|-----------|-----------|-----------|
| H | 0.069199  | 4.355812  | -1.490584 |
| H | 2.615737  | 3.132393  | -2.278165 |
| C | 0.426423  | 4.360776  | -0.450260 |
| C | 2.918488  | 3.178014  | -1.221651 |
| H | 0.987994  | 5.288581  | -0.260340 |
| H | -0.451938 | 4.328277  | 0.211622  |
| H | 3.365708  | 4.162372  | -1.014714 |
| H | 3.673149  | 2.397098  | -1.046945 |
| P | 1.459339  | 2.880075  | -0.160961 |
| C | 2.098543  | 3.144576  | 1.531195  |
| H | 2.592056  | 4.123358  | 1.634452  |
| H | 1.264080  | 3.080523  | 2.245489  |
| H | 2.813851  | 2.345683  | 1.774622  |
| B | 1.577937  | -1.238966 | 0.435086  |
| O | 2.476335  | -1.380572 | 1.484755  |
| O | 2.183233  | -1.547462 | -0.780985 |
| C | 3.785123  | -1.491770 | 0.915473  |
| C | 3.479755  | -2.087029 | -0.506157 |
| C | 4.651570  | -2.371943 | 1.801898  |
| C | 4.368436  | -0.080048 | 0.838437  |
| C | 3.353493  | -3.610679 | -0.493124 |
| C | 4.445019  | -1.651685 | -1.598756 |
| H | 2.677473  | -3.948244 | 0.306676  |
| H | 4.328286  | -4.102230 | -0.358288 |
| H | 2.931868  | -3.942365 | -1.453606 |
| H | 4.420282  | -0.564028 | -1.748864 |
| H | 4.170998  | -2.129061 | -2.551504 |
| H | 5.476420  | -1.949288 | -1.354737 |
| H | 3.746498  | 0.559595  | 0.194083  |
| H | 5.396849  | -0.076304 | 0.449314  |
| H | 4.381105  | 0.359850  | 1.846669  |
| H | 5.634393  | -2.545927 | 1.337607  |
| H | 4.177375  | -3.343370 | 1.994170  |
| H | 4.817102  | -1.879433 | 2.771929  |
| C | -3.104426 | -1.532834 | -1.027438 |
| C | -4.479411 | -1.497480 | -0.808304 |

|    |           |           |           |
|----|-----------|-----------|-----------|
| C  | -2.227831 | -0.668707 | -0.366887 |
| C  | -5.050072 | -0.574011 | 0.096833  |
| C  | -2.792312 | 0.252543  | 0.523605  |
| C  | -4.160429 | 0.308219  | 0.756864  |
| C  | -0.750756 | -0.742163 | -0.592331 |
| C  | 0.136049  | -0.792336 | 0.555451  |
| H  | -4.538631 | 1.053185  | 1.456819  |
| H  | -2.141099 | 0.960383  | 1.045812  |
| H  | -5.110061 | -2.201184 | -1.351400 |
| H  | -2.705518 | -2.263613 | -1.737288 |
| Cu | 0.395086  | 0.969944  | -0.490844 |
| H  | -0.289596 | -0.550362 | 1.536131  |
| H  | -0.666509 | 0.578832  | -1.615521 |
| H  | -0.477709 | -1.394957 | -1.428633 |
| H  | -7.090801 | -2.465753 | -0.220881 |
| H  | -8.327919 | -1.193930 | -0.133794 |
| C  | -7.289076 | -1.397173 | -0.420187 |
| H  | -7.207444 | -1.239542 | -1.510886 |
| N  | -6.407021 | -0.529295 | 0.322722  |
| H  | -6.525140 | 0.297238  | 2.271287  |
| H  | -8.035919 | 0.276236  | 1.341038  |
| C  | -6.952027 | 0.422906  | 1.260565  |
| H  | -6.776135 | 1.469779  | 0.951290  |

59

Figure 3\_para-NMe2\_L-Cu-alkyl\_rev / electronic energy: -2955.33794627 a.u. / lowest freq: 25.95 cm-1

|    |           |           |           |
|----|-----------|-----------|-----------|
| H  | 2.037107  | 2.373024  | 1.544652  |
| H  | -0.821333 | 2.875862  | 2.106699  |
| C  | 1.914582  | 2.885974  | 0.579498  |
| C  | -0.842675 | 3.423713  | 1.152696  |
| H  | 2.099364  | 3.962679  | 0.717519  |
| H  | 2.653325  | 2.476142  | -0.125170 |
| H  | -0.514270 | 4.460859  | 1.322372  |
| H  | -1.879985 | 3.431755  | 0.786054  |
| P  | 0.230408  | 2.575736  | -0.063020 |
| C  | 0.132099  | 3.658399  | -1.532754 |
| H  | 0.351564  | 4.707468  | -1.280406 |
| H  | 0.851446  | 3.310057  | -2.288940 |
| H  | -0.876833 | 3.592250  | -1.966765 |
| B  | -2.145595 | -1.248813 | -0.377364 |
| O  | -3.105541 | -0.842229 | -1.311215 |
| O  | -2.713939 | -1.288973 | 0.899523  |
| C  | -4.175875 | -0.237033 | -0.588400 |
| C  | -4.103992 | -0.986010 | 0.792541  |
| C  | -5.477570 | -0.427663 | -1.351392 |
| C  | -3.857178 | 1.256141  | -0.461471 |
| C  | -4.873431 | -2.307699 | 0.786137  |
| C  | -4.525460 | -0.144943 | 1.989906  |
| H  | -4.603748 | -2.921250 | -0.086522 |
| H  | -5.962352 | -2.150632 | 0.780415  |
| H  | -4.613507 | -2.876633 | 1.691487  |
| H  | -3.877038 | 0.733197  | 2.111126  |
| H  | -4.456737 | -0.742874 | 2.911390  |
| H  | -5.566311 | 0.198611  | 1.885380  |
| H  | -2.918303 | 1.408333  | 0.093380  |
| H  | -4.660096 | 1.814668  | 0.041910  |
| H  | -3.721482 | 1.679725  | -1.468419 |
| H  | -6.333484 | -0.050276 | -0.770972 |
| H  | -5.654882 | -1.484961 | -1.588883 |
| H  | -5.439614 | 0.128653  | -2.300356 |
| C  | 2.543070  | -2.420465 | -0.703223 |
| C  | 3.859557  | -1.966482 | -0.761067 |
| C  | 1.635549  | -1.959926 | 0.255072  |
| C  | 4.345896  | -1.019831 | 0.167934  |
| C  | 2.119409  | -1.019980 | 1.172654  |
| C  | 3.431668  | -0.555170 | 1.141143  |
| C  | 0.178046  | -2.368767 | 0.234247  |
| C  | -0.685436 | -1.504002 | -0.690121 |
| H  | 3.745074  | 0.174962  | 1.887504  |
| H  | 1.443524  | -0.629692 | 1.941100  |
| H  | 4.513476  | -2.362601 | -1.538272 |
| H  | 2.210389  | -3.154120 | -1.444573 |
| Cu | -0.239372 | 0.427069  | -0.416820 |
| H  | -0.477155 | -1.688256 | -1.759564 |
| H  | -0.219163 | -2.309325 | 1.261221  |
| H  | 0.120196  | -3.438079 | -0.048486 |
| H  | 6.088902  | -0.557469 | -1.958194 |
| H  | 7.486105  | -0.480676 | -0.855503 |
| C  | 6.490998  | -0.921987 | -0.992922 |
| H  | 6.626737  | -2.013150 | -1.077860 |
| N  | 5.653455  | -0.571724 | 0.129611  |
| H  | 5.515991  | 1.455673  | 0.785424  |
| H  | 7.130338  | 0.704754  | 0.852780  |
| C  | 6.059152  | 0.512376  | 0.991127  |
| H  | 5.907588  | 0.266162  | 2.055017  |

80

Figure 3\_para-NMe2\_pc3\_01 / electronic energy: -3794.16568164 a.u. / lowest freq: 17.56 cm-1

|   |           |           |           |
|---|-----------|-----------|-----------|
| C | -0.013648 | -1.135612 | -1.049692 |
| C | 0.215308  | -1.906717 | 0.079903  |
| C | 1.548480  | -1.963161 | 0.761131  |
| O | 2.419560  | -2.940563 | 0.144736  |
| P | 3.636826  | -2.479819 | -0.774461 |
| O | 3.361741  | -1.646398 | -1.963195 |
| O | 4.593530  | -1.783397 | 0.319951  |
| O | 4.319317  | -3.869019 | -1.156343 |
| C | 5.736287  | -1.046372 | -0.099662 |
| H | -0.864586 | -1.348730 | -1.704314 |
| H | 0.779417  | -0.509864 | -1.474939 |



|    |           |           |           |
|----|-----------|-----------|-----------|
| H  | -0.476221 | -2.724085 | 0.316830  |
| H  | 2.040864  | -0.981111 | 0.752130  |
| H  | 1.448350  | -2.281967 | 1.806395  |
| B  | 0.288093  | 2.579913  | -1.164736 |
| O  | 1.418844  | 2.135597  | -1.804945 |
| O  | 0.589010  | 3.475825  | -0.165257 |
| C  | 2.560203  | 2.576112  | -1.050846 |
| C  | 1.982471  | 3.816957  | -0.280207 |
| C  | 3.701705  | 2.884049  | -2.005338 |
| C  | 2.943939  | 1.424694  | -0.124302 |
| C  | 2.063301  | 5.111422  | -1.088317 |
| C  | 2.571782  | 4.031017  | 1.104666  |
| H  | 1.656054  | 4.979030  | -2.101881 |
| H  | 3.097797  | 5.474288  | -1.173164 |
| H  | 1.467992  | 5.886584  | -0.583624 |
| H  | 2.413035  | 3.163579  | 1.757697  |
| H  | 2.102078  | 4.904606  | 1.580846  |
| H  | 3.653522  | 4.222447  | 1.037088  |
| H  | 2.130779  | 1.208942  | 0.586444  |
| H  | 3.857568  | 1.642536  | 0.447954  |
| H  | 3.116309  | 0.527308  | -0.735330 |
| H  | 4.563189  | 3.301563  | -1.462348 |
| H  | 3.398979  | 3.596439  | -2.783751 |
| H  | 4.027078  | 1.958028  | -2.502186 |
| C  | -4.082078 | 0.654234  | 0.486453  |
| C  | -5.287722 | -0.023324 | 0.325297  |
| C  | -3.111766 | 0.755650  | -0.531066 |
| C  | -5.615008 | -0.658218 | -0.893335 |
| C  | -3.460998 | 0.132898  | -1.744999 |
| C  | -4.661493 | -0.552502 | -1.927286 |
| C  | -1.797248 | 1.418232  | -0.292594 |
| C  | -1.152138 | 2.081687  | -1.518672 |
| H  | -4.851752 | -1.008385 | -2.899898 |
| H  | -2.767974 | 0.175842  | -2.589154 |
| H  | -5.985554 | -0.047105 | 1.163555  |
| H  | -3.885301 | 1.135870  | 1.448894  |
| Cu | -0.766435 | -0.120478 | 0.533552  |
| H  | -1.773362 | 2.913917  | -1.914734 |
| H  | -1.042742 | 1.364167  | -2.348718 |
| H  | -1.923720 | 2.179472  | 0.497184  |
| H  | 6.113694  | -0.504263 | 0.776389  |
| H  | 5.477445  | -0.328906 | -0.892022 |
| C  | 6.521757  | -1.724244 | -0.469335 |
| C  | 4.637475  | -4.854088 | -0.179302 |
| H  | 5.299464  | -5.584157 | -0.661527 |
| H  | 3.726622  | -5.362147 | 0.169425  |
| H  | 5.159456  | -4.408413 | 0.681268  |
| H  | 1.691176  | 0.578501  | 2.942724  |
| H  | 0.700501  | 2.044487  | 2.704040  |
| H  | 0.816431  | 1.296919  | 4.332029  |
| C  | 0.768560  | 1.092683  | 3.250968  |
| H  | 0.396529  | -1.928933 | 3.694535  |
| P  | -0.687919 | 0.071687  | 2.817199  |
| H  | -0.507270 | -1.078070 | 4.982688  |
| C  | -0.527922 | -1.379480 | 3.923813  |
| H  | -2.197476 | 1.956871  | 3.071498  |
| H  | -1.852076 | 1.195621  | 4.657763  |
| C  | -2.059677 | 0.999083  | 3.594357  |
| H  | -1.378191 | -2.058504 | 3.759891  |
| H  | -2.991748 | 0.420640  | 3.514159  |
| H  | -6.313355 | -2.795169 | -2.534616 |
| H  | -8.047166 | -2.515299 | -2.256165 |
| C  | -7.069900 | -2.019609 | -2.309282 |
| H  | -7.096611 | -1.325449 | -3.169290 |
| N  | -6.809356 | -1.338497 | -1.066750 |
| H  | -7.302095 | -1.967179 | 0.904606  |
| H  | -8.616643 | -2.021320 | -0.291428 |
| C  | -7.737346 | -1.448506 | 0.028998  |
| H  | -8.095628 | -0.461718 | 0.375557  |

80

Figure 3\_para-NMe2\_pc3\_02 / electronic energy: -3794.16837386 a.u. / lowest freq: 22.64 cm-1

|   |           |           |           |
|---|-----------|-----------|-----------|
| C | -0.098724 | -1.841118 | -0.494157 |
| C | 0.195694  | -1.809351 | 0.864080  |
| C | 1.582697  | -1.508101 | 1.361985  |
| O | 2.463462  | -2.651475 | 1.263913  |
| P | 3.164112  | -2.992139 | -0.131306 |
| O | 3.428895  | -1.860349 | -1.044876 |
| O | 4.435393  | -3.784637 | 0.439112  |
| O | 2.266293  | -4.110528 | -0.850686 |
| C | 5.347456  | -4.377694 | -0.480096 |
| H | -0.995678 | -2.348750 | -0.861431 |
| H | 0.678182  | -1.658601 | -1.242594 |
| H | -0.478849 | -2.305108 | 1.571720  |
| H | 2.038471  | -0.674565 | 0.805777  |
| H | 1.574012  | -1.251815 | 2.428843  |
| B | -3.372385 | 0.748421  | -1.149417 |
| O | -4.056350 | 0.805933  | 0.046223  |
| O | -3.703456 | -0.371543 | -1.869474 |
| C | -4.669573 | -0.473574 | 0.267172  |
| C | -4.779907 | -1.044898 | -1.196404 |
| C | -5.999308 | -0.278462 | 0.977402  |
| C | -3.713555 | -1.275273 | 1.148676  |
| C | -6.074203 | -0.640194 | -1.900130 |
| C | -4.573050 | -2.547333 | -1.308266 |
| H | -6.248257 | 0.443710  | -1.827745 |
| H | -6.946434 | -1.162602 | -1.481420 |
| H | -5.996809 | -0.898384 | -2.966496 |

|    |           |           |           |
|----|-----------|-----------|-----------|
| H  | -3.581823 | -2.850245 | -0.946124 |
| H  | -4.656318 | -2.855664 | -2.360955 |
| H  | -5.338521 | -3.090768 | -0.733715 |
| H  | -2.737753 | -1.396855 | 0.654522  |
| H  | -4.113360 | -2.269543 | 1.393480  |
| H  | -3.549431 | -0.730333 | 2.089928  |
| H  | -6.523901 | -1.239150 | 1.091720  |
| H  | -6.653305 | 0.415663  | 0.433833  |
| H  | -5.827958 | 0.135876  | 1.982240  |
| C  | 1.577828  | 1.452170  | -1.431132 |
| C  | 2.725038  | 2.208521  | -1.228001 |
| C  | 0.273787  | 1.993189  | -1.360881 |
| C  | 2.656693  | 3.593596  | -0.953493 |
| C  | 0.222466  | 3.374584  | -1.109766 |
| C  | 1.366108  | 4.151276  | -0.900713 |
| C  | -0.925201 | 1.106503  | -1.447381 |
| C  | -2.292691 | 1.800076  | -1.561535 |
| H  | 1.231328  | 5.214525  | -0.698923 |
| H  | -0.745454 | 3.878838  | -1.057973 |
| H  | 3.688210  | 1.700148  | -1.283874 |
| H  | 1.706776  | 0.382426  | -1.623790 |
| Cu | -0.623472 | -0.019678 | 0.222605  |
| H  | -2.468213 | 2.242586  | -2.563438 |
| H  | -2.372016 | 2.626945  | -0.838012 |
| H  | -0.800860 | 0.408320  | -2.291855 |
| H  | 6.188270  | -4.769508 | 0.105150  |
| H  | 5.723147  | -3.634409 | -1.199716 |
| H  | 4.872967  | -5.206609 | -1.028920 |
| C  | 1.718979  | -5.205305 | -0.129073 |
| H  | 1.360375  | -5.933823 | -0.867142 |
| H  | 0.873837  | -4.877734 | 0.495354  |
| H  | 2.475515  | -5.685674 | 0.511116  |
| H  | 1.727133  | 1.354203  | 2.596471  |
| H  | 1.247157  | 2.657826  | 1.480135  |
| H  | 0.901311  | 2.812878  | 3.233942  |
| C  | 0.954399  | 2.109113  | 2.388556  |
| H  | -0.266425 | -0.297607 | 3.907899  |
| P  | -0.651720 | 1.282992  | 2.098305  |
| H  | -0.983296 | 1.221590  | 4.532875  |
| C  | -1.008202 | 0.490595  | 3.709779  |
| H  | -1.544958 | 3.361947  | 1.250432  |
| H  | -1.866631 | 3.214611  | 3.007693  |
| C  | -1.840754 | 2.668968  | 2.051661  |
| H  | -2.003154 | 0.022082  | 3.677384  |
| H  | -2.840305 | 2.276424  | 1.813479  |
| H  | 5.035493  | 3.042959  | 0.404193  |
| H  | 5.337176  | 3.036521  | -1.354347 |
| C  | 5.053299  | 3.678074  | -0.505428 |
| H  | 5.852787  | 4.420767  | -0.384163 |
| N  | 3.803825  | 4.359020  | -0.749209 |
| H  | 3.046753  | 6.328748  | -0.843832 |
| H  | 4.640555  | 6.152785  | -0.098017 |
| C  | 3.653519  | 5.681168  | -0.190958 |
| H  | 3.179506  | 5.679614  | 0.812234  |

80

Figure 3\_para-NMe2\_ts(AS)\_01 / electronic energy: -3794.13369549 a.u. / lowest freq: -333.24 cm<sup>-1</sup>

|   |           |           |           |
|---|-----------|-----------|-----------|
| C | -0.185555 | -1.002249 | -1.094395 |
| C | -0.045900 | -1.983247 | -0.083214 |
| C | 1.004439  | -1.965111 | 0.838722  |
| O | 2.487683  | -3.265587 | 0.196268  |
| P | 3.578805  | -2.534904 | -0.581240 |
| O | 3.260468  | -1.620817 | -1.718547 |
| O | 4.427125  | -1.739169 | 0.582787  |
| O | 4.660956  | -3.640697 | -1.101747 |
| C | 5.557572  | -0.988359 | 0.206053  |
| H | -0.983095 | -1.112642 | -1.832194 |
| H | 0.693001  | -0.431432 | -1.417586 |
| H | -0.809412 | -2.760930 | 0.020354  |
| H | 1.721533  | -1.144147 | 0.850197  |
| H | 0.942660  | -2.568527 | 1.742576  |
| B | 0.282466  | 2.460085  | -1.315549 |
| O | 1.386796  | 1.845996  | -1.843975 |
| O | 0.619551  | 3.487920  | -0.469800 |
| C | 2.536798  | 2.312683  | -1.112852 |
| C | 2.040559  | 3.710480  | -0.604903 |
| C | 3.738955  | 2.336789  | -2.040003 |
| C | 2.767139  | 1.311577  | 0.015450  |
| C | 2.227164  | 4.816307  | -1.642472 |
| C | 2.616419  | 4.146460  | 0.731369  |
| H | 1.833052  | 4.515423  | -2.624772 |
| H | 3.287272  | 5.082696  | -1.760922 |
| H | 1.681027  | 5.713965  | -1.317022 |
| H | 2.399094  | 3.425538  | 1.528936  |
| H | 2.189017  | 5.117395  | 1.023053  |
| H | 3.708068  | 4.265003  | 0.657720  |
| H | 1.886528  | 1.264301  | 0.674816  |
| H | 3.645963  | 1.569598  | 0.623953  |
| H | 2.928803  | 0.321091  | -0.433678 |
| H | 4.620219  | 2.748824  | -1.525366 |
| H | 3.547905  | 2.931920  | -2.942687 |
| H | 3.969312  | 1.306831  | -2.350174 |
| C | -4.049740 | 0.574744  | 0.490960  |
| C | -5.264215 | -0.094673 | 0.380287  |
| C | -3.116603 | 0.644652  | -0.558545 |
| C | -5.631298 | -0.750500 | -0.816739 |
| C | -3.501272 | 0.006602  | -1.751078 |
| C | -4.710025 | -0.669692 | -1.885213 |

|    |           |           |           |
|----|-----------|-----------|-----------|
| C  | -1.795496 | 1.318388  | -0.374330 |
| C  | -1.181449 | 1.981769  | -1.610222 |
| H  | -4.933924 | -1.139350 | -2.843364 |
| H  | -2.835643 | 0.032585  | -2.617365 |
| H  | -5.935680 | -0.096886 | 1.239389  |
| H  | -3.822878 | 1.075648  | 1.435021  |
| Cu | -0.722577 | -0.096594 | 0.587447  |
| H  | -1.814381 | 2.828732  | -1.941043 |
| H  | -1.131629 | 1.279248  | -2.456478 |
| H  | -1.883650 | 2.067512  | 0.429704  |
| H  | 5.908895  | -0.433505 | 1.088181  |
| H  | 5.323202  | -0.271554 | -0.598049 |
| H  | 6.376408  | -1.641248 | -0.144103 |
| C  | 5.095318  | -4.654388 | -0.223645 |
| H  | 5.894826  | -5.216426 | -0.727602 |
| H  | 4.277193  | -5.347888 | 0.030238  |
| H  | 5.499445  | -4.237177 | 0.714965  |
| H  | 1.662265  | 1.358004  | 2.928618  |
| H  | 0.466047  | 2.588569  | 2.429941  |
| H  | 0.602380  | 2.114542  | 4.157669  |
| C  | 0.653954  | 1.752739  | 3.119368  |
| H  | 0.859195  | -1.250774 | 3.788649  |
| P  | -0.586318 | 0.446344  | 2.823245  |
| H  | -0.128043 | -0.451687 | 5.052062  |
| C  | -0.137574 | -0.852771 | 4.026944  |
| H  | -2.398606 | 2.059844  | 2.975589  |
| H  | -1.933301 | 1.443518  | 4.590552  |
| C  | -2.104647 | 1.162950  | 3.540068  |
| H  | -0.866453 | -1.674851 | 3.968462  |
| H  | -2.921294 | 0.427969  | 3.495532  |
| H  | -6.393628 | -2.896593 | -2.408950 |
| H  | -8.114202 | -2.614928 | -2.062882 |
| C  | -7.140774 | -2.119682 | -2.163645 |
| H  | -7.203534 | -1.433190 | -3.027295 |
| N  | -6.826907 | -1.426246 | -0.937812 |
| H  | -7.278544 | -1.994622 | 1.060271  |
| H  | -8.623529 | -2.064590 | -0.099698 |
| C  | -7.730751 | -1.493968 | 0.183991  |
| H  | -8.067210 | -0.493056 | 0.509530  |

80

Figure 3\_para-NMe2\_ts(AS)\_02 / electronic energy: -3794.13722913 a.u. / lowest freq: -346.50 cm<sup>-1</sup>

|    |           |           |           |
|----|-----------|-----------|-----------|
| C  | 0.412377  | 1.709915  | -0.577616 |
| C  | 0.308614  | 1.975481  | 0.819115  |
| C  | -0.833094 | 1.607117  | 1.540142  |
| O  | -2.225910 | 3.118845  | 1.494396  |
| P  | -2.904945 | 3.143477  | 0.125287  |
| O  | -2.902293 | 1.927972  | -0.748712 |
| O  | -4.419550 | 3.668550  | 0.436395  |
| O  | -2.284242 | 4.374152  | -0.754942 |
| C  | -5.325299 | 3.794554  | -0.638535 |
| H  | 1.299122  | 2.037896  | -1.126010 |
| H  | -0.514596 | 1.639298  | -1.155058 |
| H  | 1.128342  | 2.468707  | 1.350759  |
| H  | -1.585744 | 0.969662  | 1.073666  |
| H  | -0.827552 | 1.652982  | 2.628849  |
| B  | 3.207998  | -0.733382 | -1.261112 |
| O  | 4.101863  | -1.031309 | -0.261116 |
| O  | 3.397466  | 0.525760  | -1.764531 |
| C  | 4.765882  | 0.189798  | 0.113281  |
| C  | 4.591919  | 1.073549  | -1.178100 |
| C  | 6.207969  | -0.112785 | 0.484901  |
| C  | 4.013121  | 0.738396  | 1.323910  |
| C  | 5.717302  | 0.881729  | -2.192513 |
| C  | 4.375381  | 2.553651  | -0.906838 |
| H  | 5.891506  | -0.184084 | -2.402537 |
| H  | 6.659284  | 1.327399  | -1.842456 |
| H  | 5.435081  | 1.371050  | -3.136131 |
| H  | 3.483109  | 2.729532  | -0.291729 |
| H  | 4.241729  | 3.089235  | -1.858315 |
| H  | 5.246590  | 2.986358  | -0.392302 |
| H  | 2.953657  | 0.921477  | 1.083436  |
| H  | 4.455964  | 1.672031  | 1.698712  |
| H  | 4.052652  | -0.006290 | 2.132160  |
| H  | 6.757034  | 0.818771  | 0.689160  |
| H  | 6.728277  | -0.658267 | -0.313059 |
| H  | 6.238572  | -0.730379 | 1.394898  |
| C  | -1.790109 | -1.237200 | -1.215545 |
| C  | -2.945360 | -1.977149 | -1.002654 |
| C  | -0.517433 | -1.836233 | -1.331793 |
| C  | -2.912505 | -3.388642 | -0.905478 |
| C  | -0.493693 | -3.235952 | -1.239321 |
| C  | -1.645219 | -3.995296 | -1.028864 |
| C  | 0.708901  | -0.990491 | -1.471494 |
| C  | 2.048635  | -1.697292 | -1.687024 |
| H  | -1.541559 | -5.078866 | -0.967580 |
| H  | 0.454102  | -3.769871 | -1.337692 |
| H  | -3.887602 | -1.437004 | -0.906696 |
| H  | -1.898884 | -0.148053 | -1.262734 |
| Cu | 0.649100  | -0.038137 | 0.304147  |
| H  | 2.156664  | -2.034275 | -2.736768 |
| H  | 2.132544  | -2.598475 | -1.061530 |
| H  | 0.559028  | -0.236303 | -2.254364 |
| H  | -6.283575 | 4.146174  | -0.230463 |
| H  | -5.484084 | 2.828954  | -1.145762 |
| H  | -4.971604 | 4.526427  | -1.385213 |
| C  | -2.091957 | 5.629101  | -0.143694 |
| H  | -1.717494 | 6.324857  | -0.908410 |

|   |           |           |           |
|---|-----------|-----------|-----------|
| H | -1.356394 | 5.571835  | 0.675339  |
| H | -3.034626 | 6.033459  | 0.264477  |
| H | -1.585281 | -1.484003 | 2.662186  |
| H | -1.253604 | -2.772994 | 1.474805  |
| H | -0.811887 | -3.012607 | 3.197569  |
| C | -0.876174 | -2.276659 | 2.381273  |
| H | 0.622067  | -0.047103 | 3.934912  |
| P | 0.752924  | -1.536441 | 2.023930  |
| H | 1.279254  | -1.645421 | 4.414501  |
| C | 1.291684  | -0.866851 | 3.636495  |
| H | 1.464274  | -3.568214 | 0.926414  |
| H | 1.910731  | -3.595280 | 2.661548  |
| C | 1.853352  | -2.966183 | 1.760038  |
| H | 2.311092  | -0.463984 | 3.548112  |
| H | 2.856740  | -2.605071 | 1.489780  |
| H | -5.254263 | -2.868060 | 0.543656  |
| H | -5.591845 | -2.760077 | -1.204131 |
| C | -5.299746 | -3.451283 | -0.396788 |
| H | -6.103502 | -4.191594 | -0.296360 |
| N | -4.060952 | -4.129140 | -0.698042 |
| H | -3.461507 | -6.080658 | -1.247922 |
| H | -4.953289 | -5.969407 | -0.301056 |
| C | -3.950502 | -5.540575 | -0.420124 |
| H | -3.378386 | -5.754401 | 0.504133  |

80

Figure 3\_para-NMe2\_pi-allyl\_01 / electronic energy: -3794.16230939 a.u. / lowest freq: 19.87 cm<sup>-1</sup>

|    |           |           |           |
|----|-----------|-----------|-----------|
| C  | 0.875811  | 1.817945  | -1.438411 |
| C  | 1.425378  | 2.479938  | -0.302808 |
| C  | 0.728435  | 2.545748  | 0.888128  |
| O  | -2.384896 | 1.981952  | 1.100363  |
| P  | -2.983033 | 2.394480  | -0.219040 |
| O  | -2.208153 | 2.347011  | -1.506879 |
| O  | -4.380522 | 1.535931  | -0.375931 |
| O  | -3.569510 | 3.926173  | -0.102339 |
| C  | -5.127143 | 1.678861  | -1.560047 |
| H  | 1.520135  | 1.652668  | -2.303974 |
| H  | -0.209972 | 1.910548  | -1.611485 |
| H  | 2.498696  | 2.697010  | -0.293195 |
| H  | -0.369075 | 2.435116  | 0.934617  |
| H  | 1.238893  | 2.894280  | 1.789965  |
| B  | 3.305820  | -1.012957 | -0.882701 |
| O  | 4.079943  | -1.261494 | 0.221199  |
| O  | 3.801699  | 0.005687  | -1.648580 |
| C  | 5.065894  | -0.216161 | 0.320655  |
| C  | 5.118490  | 0.328819  | -1.155699 |
| C  | 6.374456  | -0.802058 | 0.825321  |
| C  | 4.526587  | 0.800674  | 1.324723  |
| C  | 6.114916  | -0.424317 | -2.034845 |
| C  | 5.346703  | 1.825944  | -1.272374 |
| H  | 5.976308  | -1.513120 | -1.959315 |
| H  | 7.154290  | -0.185111 | -1.768450 |
| H  | 5.953951  | -0.136095 | -3.083861 |
| H  | 4.555576  | 2.400557  | -0.774297 |
| H  | 5.363475  | 2.119616  | -2.332227 |
| H  | 6.312787  | 2.104411  | -0.825730 |
| H  | 3.564637  | 1.216970  | 0.993342  |
| H  | 5.230727  | 1.629259  | 1.485191  |
| H  | 4.366433  | 0.298918  | 2.290433  |
| H  | 7.164557  | -0.036480 | 0.824041  |
| H  | 6.706206  | -1.649915 | 0.212253  |
| H  | 6.249642  | -1.159039 | 1.858221  |
| C  | -1.782498 | -0.922050 | -1.206134 |
| C  | -3.021297 | -1.483780 | -0.941780 |
| C  | -0.583996 | -1.648743 | -1.079812 |
| C  | -3.147979 | -2.838082 | -0.550977 |
| C  | -0.712469 | -2.991367 | -0.697469 |
| C  | -1.951121 | -3.579269 | -0.442423 |
| C  | 0.731775  | -0.979037 | -1.327376 |
| C  | 1.993356  | -1.824809 | -1.176346 |
| H  | -1.974726 | -4.631431 | -0.157284 |
| H  | 0.174633  | -3.621003 | -0.602541 |
| H  | -3.894489 | -0.836228 | -1.003082 |
| H  | -1.755510 | 0.137987  | -1.479357 |
| Cu | 0.815693  | 0.485012  | 0.062392  |
| H  | 2.140819  | -2.428076 | -2.093721 |
| H  | 1.888632  | -2.544232 | -0.352713 |
| H  | 0.719049  | -0.492789 | -2.308023 |
| H  | -6.061737 | 1.110133  | -1.443466 |
| H  | -4.581985 | 1.294088  | -2.438202 |
| H  | -5.384265 | 2.735123  | -1.754750 |
| C  | -4.335603 | 4.270762  | 1.024711  |
| H  | -4.551245 | 5.348564  | 0.976340  |
| H  | -3.795560 | 4.057494  | 1.962494  |
| H  | -5.294949 | 3.723375  | 1.050524  |
| H  | -1.809682 | 0.104452  | 2.096655  |
| H  | -1.613670 | -1.613980 | 1.650614  |
| H  | -1.465038 | -1.138595 | 3.376306  |
| C  | -1.269743 | -0.827733 | 2.338482  |
| H  | 0.458089  | 1.353424  | 3.575442  |
| P  | 0.507341  | -0.547513 | 2.075251  |
| H  | 0.871972  | -0.150337 | 4.453923  |
| C  | 1.037872  | 0.420611  | 3.527681  |
| H  | 0.884325  | -2.895617 | 1.624415  |
| H  | 1.144764  | -2.515628 | 3.353037  |
| C  | 1.310546  | -2.163211 | 2.323606  |
| H  | 2.106005  | 0.668858  | 3.443434  |
| H  | 2.389188  | -2.072248 | 2.129154  |

|   |           |           |           |
|---|-----------|-----------|-----------|
| H | -5.518948 | -1.746982 | 0.429654  |
| H | -5.719394 | -2.109959 | -1.303884 |
| C | -5.560337 | -2.566353 | -0.311729 |
| H | -6.440447 | -3.181054 | -0.086552 |
| N | -4.377881 | -3.395832 | -0.285712 |
| H | -4.038631 | -5.475427 | -0.508067 |
| H | -5.513754 | -5.014915 | 0.364251  |
| C | -4.461243 | -4.748817 | 0.207765  |
| H | -3.933601 | -4.881983 | 1.171122  |

80

Figure 3\_para-NMe2\_pi-allyl\_02 / electronic energy: -3794.15615510 a.u. / lowest freq: 16.22 cm-1

|    |           |           |           |
|----|-----------|-----------|-----------|
| C  | -0.513788 | -0.907893 | -1.666995 |
| C  | -1.187002 | -1.932278 | -0.952543 |
| C  | -0.612388 | -2.491996 | 0.182255  |
| O  | 2.447310  | -2.710480 | 0.777740  |
| P  | 3.200840  | -2.491081 | -0.508923 |
| O  | 2.581069  | -1.823717 | -1.701887 |
| O  | 4.590511  | -1.716973 | -0.076562 |
| O  | 3.795413  | -3.928919 | -1.044160 |
| C  | 5.519798  | -1.386125 | -1.076575 |
| H  | -1.028439 | -0.403389 | -2.486609 |
| H  | 0.589167  | -0.928925 | -1.689268 |
| H  | -2.259857 | -2.075317 | -1.132122 |
| H  | 0.480733  | -2.540639 | 0.324376  |
| H  | -1.229413 | -3.118971 | 0.833054  |
| B  | 0.539353  | 2.698281  | -0.995847 |
| O  | 1.635160  | 2.403835  | -1.752302 |
| O  | 0.866230  | 3.294481  | 0.197357  |
| C  | 2.790476  | 2.543540  | -0.894830 |
| C  | 2.279961  | 3.583013  | 0.162972  |
| C  | 3.980592  | 2.996694  | -1.720775 |
| C  | 3.047630  | 1.166836  | -0.293802 |
| C  | 2.436249  | 5.031143  | -0.296327 |
| C  | 2.863494  | 3.406266  | 1.553928  |
| H  | 2.046276  | 5.175298  | -1.315069 |
| H  | 3.489087  | 5.347464  | -0.277877 |
| H  | 1.868245  | 5.687218  | 0.379577  |
| H  | 2.629282  | 2.418572  | 1.969751  |
| H  | 2.456898  | 4.168977  | 2.234788  |
| H  | 3.957529  | 3.521731  | 1.529876  |
| H  | 2.209414  | 0.851202  | 0.347015  |
| H  | 3.969317  | 1.139713  | 0.303917  |
| H  | 3.125038  | 0.420107  | -1.094863 |
| H  | 4.845445  | 3.195661  | -1.069964 |
| H  | 3.758763  | 3.904580  | -2.297515 |
| H  | 4.263733  | 2.202803  | -2.427412 |
| C  | -3.634152 | 0.571377  | 0.742948  |
| C  | -4.889121 | -0.018997 | 0.671674  |
| C  | -2.905684 | 0.943869  | -0.403006 |
| C  | -5.503041 | -0.275485 | -0.577587 |
| C  | -3.530212 | 0.703763  | -1.640762 |
| C  | -4.784271 | 0.118842  | -1.734692 |
| C  | -1.532648 | 1.479262  | -0.272115 |
| C  | -0.939672 | 2.337024  | -1.375175 |
| H  | -5.213293 | -0.030780 | -2.725307 |
| H  | -3.019445 | 0.983344  | -2.565271 |
| H  | -5.397723 | -0.273048 | 1.601523  |
| H  | -3.200111 | 0.757702  | 1.730608  |
| Cu | -0.725837 | -0.302436 | 0.263298  |
| H  | -1.536977 | 3.266158  | -1.461153 |
| H  | -0.969201 | 1.847573  | -2.358585 |
| H  | -1.412969 | 1.985867  | 0.693656  |
| H  | 6.267313  | -0.704438 | -0.643018 |
| H  | 5.039408  | -0.884462 | -1.933699 |
| H  | 6.044060  | -2.281084 | -1.457314 |
| C  | 4.350955  | -4.816339 | -0.106639 |
| H  | 4.654918  | -5.730756 | -0.637928 |
| H  | 3.623281  | -5.083244 | 0.677751  |
| H  | 5.242705  | -4.388586 | 0.386216  |
| H  | 0.064809  | 2.328825  | 2.503103  |
| H  | -1.541793 | 1.854628  | 3.126329  |
| H  | -0.094640 | 1.666462  | 4.167592  |
| C  | -0.470488 | 1.603567  | 3.134980  |
| H  | 2.156700  | 0.388988  | 2.563976  |
| P  | -0.213302 | -0.070613 | 2.463798  |
| H  | 1.637314  | -0.636831 | 3.931507  |
| C  | 1.521945  | -0.461506 | 2.850874  |
| H  | -2.262257 | -1.019984 | 3.355729  |
| H  | -0.981526 | -0.943589 | 4.611330  |
| C  | -1.189026 | -1.159650 | 3.552187  |
| H  | 1.855846  | -1.341833 | 2.272789  |
| H  | -0.928986 | -2.206759 | 3.338835  |
| H  | -6.744700 | -1.717275 | -2.611666 |
| H  | -8.327636 | -1.553344 | -1.823859 |
| C  | -7.353322 | -1.068675 | -1.957665 |
| H  | -7.522048 | -0.115199 | -2.489775 |
| N  | -6.735219 | -0.871713 | -0.666331 |
| H  | -6.880777 | -1.910922 | 1.174565  |
| H  | -8.393941 | -1.719174 | 0.267621  |
| C  | -7.456271 | -1.218374 | 0.536240  |
| H  | -7.709206 | -0.330770 | 1.144635  |

56

Figure 3\_L-Cu-OtBu\_dimer / electronic energy: -4668.27269506 a.u. / lowest freq: 20.28 cm-1

|   |           |          |          |
|---|-----------|----------|----------|
| H | 1.454781  | 3.185323 | 2.121955 |
| H | -1.091667 | 3.295320 | 2.232897 |
| H | 1.480610  | 4.376760 | 0.788877 |
| C | 1.390257  | 3.304563 | 1.028715 |

|    |           |           |           |
|----|-----------|-----------|-----------|
| H  | 2.248895  | 2.774926  | 0.584062  |
| H  | -1.141168 | 4.483981  | 0.897486  |
| C  | -1.116435 | 3.408141  | 1.137329  |
| C  | 0.084478  | 2.685555  | 0.510787  |
| O  | 0.044189  | 1.344738  | 0.873648  |
| H  | -2.049560 | 2.947919  | 0.774353  |
| H  | 0.052315  | 3.874754  | -1.357879 |
| C  | 0.025055  | 2.825701  | -1.018825 |
| H  | 0.875658  | 2.290877  | -1.472279 |
| H  | -0.901160 | 2.361194  | -1.396152 |
| H  | 2.958274  | 1.006115  | -2.657041 |
| H  | 3.299551  | -1.873435 | -2.121429 |
| C  | 3.677359  | 1.175331  | -1.841405 |
| C  | 3.978968  | -1.600940 | -1.299765 |
| H  | 4.699652  | 1.104301  | -2.245503 |
| H  | 3.518839  | 2.190392  | -1.447525 |
| H  | 4.999010  | -1.491753 | -1.701120 |
| H  | 3.968610  | -2.417548 | -0.562485 |
| P  | 3.392482  | -0.052886 | -0.509011 |
| C  | 4.751395  | 0.319901  | 0.663359  |
| H  | 5.728245  | 0.345249  | 0.155766  |
| H  | 4.568915  | 1.292893  | 1.143584  |
| H  | 4.770992  | -0.448839 | 1.450266  |
| Cu | 1.387359  | -0.047785 | 0.355891  |
| H  | 1.052783  | -3.300511 | 2.261431  |
| H  | 2.049259  | -2.926990 | 0.836004  |
| O  | -0.048207 | -1.342931 | 0.876207  |
| C  | 1.110810  | -3.401807 | 1.166003  |
| H  | 1.154224  | -4.474801 | 0.916365  |
| C  | -0.077761 | -2.683448 | 0.511400  |
| H  | -1.486976 | -3.182509 | 2.088692  |
| H  | 0.959296  | -2.370999 | -1.370977 |
| C  | -1.393184 | -3.307099 | 0.998157  |
| C  | 0.017837  | -2.822386 | -1.016552 |
| H  | -2.243357 | -2.784789 | 0.529205  |
| H  | -1.470986 | -4.380974 | 0.761611  |
| H  | -0.814236 | -2.274610 | -1.489485 |
| H  | -0.015593 | -3.870539 | -1.357852 |
| H  | -2.864028 | -0.603368 | -2.784246 |
| H  | -3.433166 | 2.132063  | -1.768599 |
| C  | -3.581006 | -0.953346 | -2.026339 |
| C  | -4.101882 | 1.661026  | -1.032388 |
| H  | -4.600512 | -0.883806 | -2.437656 |
| H  | -3.356876 | -2.007230 | -1.803518 |
| H  | -5.099460 | 1.538334  | -1.483310 |
| H  | -4.181695 | 2.333019  | -0.164790 |
| P  | -3.397860 | 0.051973  | -0.503299 |
| C  | -4.732552 | -0.612373 | 0.562621  |
| H  | -5.709729 | -0.575241 | 0.056317  |
| H  | -4.504550 | -1.654856 | 0.830705  |
| H  | -4.786261 | -0.026266 | 1.492473  |
| Cu | -1.393433 | 0.048543  | 0.362283  |

28

Figure 3\_L-Cu-OtBu / electronic energy: -2334.10735270 a.u. / lowest freq: -39.13 cm<sup>-1</sup>

|    |           |           |           |
|----|-----------|-----------|-----------|
| H  | -4.105877 | -1.332535 | 0.968255  |
| H  | -4.149740 | -1.387400 | -0.808196 |
| O  | -1.712519 | -0.853226 | 0.000001  |
| C  | -4.074557 | -0.711355 | 0.058637  |
| H  | -4.956088 | -0.048773 | 0.060108  |
| C  | -2.745372 | 0.062111  | 0.000906  |
| H  | -2.638090 | 0.394148  | 2.149194  |
| H  | -2.753281 | 0.265927  | -2.166060 |
| C  | -2.653965 | 0.994061  | 1.224813  |
| C  | -2.718854 | 0.919727  | -1.279501 |
| H  | -1.712633 | 1.569392  | 1.184920  |
| H  | -3.490501 | 1.710689  | 1.287963  |
| H  | -1.776368 | 1.492537  | -1.324725 |
| H  | -3.557324 | 1.634317  | -1.340220 |
| H  | 2.442116  | 1.017710  | -2.209934 |
| H  | 3.078065  | -1.733910 | -1.400494 |
| C  | 2.702639  | 1.337847  | -1.190198 |
| C  | 3.315084  | -1.349708 | -0.397345 |
| H  | 3.784909  | 1.532944  | -1.136890 |
| H  | 2.155445  | 2.266931  | -0.971809 |
| H  | 4.370113  | -1.036408 | -0.368346 |
| H  | 3.157970  | -2.162063 | 0.327594  |
| P  | 2.201656  | 0.043634  | 0.000306  |
| C  | 2.853579  | 0.661225  | 1.592861  |
| H  | 3.931571  | 0.875098  | 1.526895  |
| H  | 2.317993  | 1.579995  | 1.874683  |
| H  | 2.679866  | -0.091178 | 2.376412  |
| Cu | 0.062960  | -0.408951 | -0.003275 |

70

Figure 3\_ed / electronic energy: -3155.87460188 a.u. / lowest freq: 11.42 cm<sup>-1</sup>

|   |           |           |           |
|---|-----------|-----------|-----------|
| H | -0.953281 | -3.166097 | -0.309839 |
| H | -2.577969 | -2.483931 | -0.153509 |
| O | -0.722801 | -0.949157 | 1.165859  |
| C | -1.784111 | -3.004943 | 0.394843  |
| H | -2.158222 | -3.987377 | 0.724568  |
| C | -1.300935 | -2.179344 | 1.589376  |
| H | 0.648291  | -3.149536 | 1.617528  |
| H | -3.221244 | -1.298799 | 2.101803  |
| C | -0.183773 | -2.938745 | 2.311306  |
| C | -2.439912 | -1.904482 | 2.572798  |
| H | 0.208864  | -2.337581 | 3.146164  |
| H | -0.544498 | -3.898139 | 2.713555  |
| H | -2.060320 | -1.341525 | 3.439455  |

|    |           |           |           |
|----|-----------|-----------|-----------|
| H  | -2.878571 | -2.846939 | 2.937460  |
| Cu | 1.139839  | -0.920846 | 0.386293  |
| H  | 1.056430  | 4.912258  | 0.610864  |
| H  | 2.420469  | 3.941746  | 2.458899  |
| H  | 0.701370  | 3.458516  | 2.402659  |
| C  | 1.735449  | 3.084044  | 2.391288  |
| H  | 2.707250  | 4.756558  | -0.052951 |
| H  | 1.879972  | 2.458170  | 3.283891  |
| C  | 1.657698  | 4.452166  | -0.184163 |
| H  | 1.306082  | 4.849580  | -1.147882 |
| C  | 1.534322  | 2.938372  | -0.174971 |
| C  | 2.012113  | 2.248287  | 1.144500  |
| O  | 0.145692  | 2.568639  | -0.221946 |
| H  | 4.143931  | 2.596400  | 0.951770  |
| B  | -0.029916 | 1.375300  | 0.444402  |
| H  | 3.702501  | 1.320418  | 2.112925  |
| C  | 3.450475  | 1.762470  | 1.137384  |
| O  | 1.127301  | 1.108628  | 1.201500  |
| H  | 3.251675  | 2.634595  | -1.503243 |
| C  | 2.195444  | 2.340356  | -1.418544 |
| H  | 1.664689  | 2.695001  | -2.313853 |
| H  | 3.609342  | 0.994382  | 0.369926  |
| H  | 2.135444  | 1.240689  | -1.404032 |
| H  | -3.741486 | -1.478482 | -2.045890 |
| H  | -4.291404 | -1.318464 | 0.099435  |
| H  | -2.833922 | -0.708588 | -3.361743 |
| C  | -3.485339 | -0.510025 | -2.496037 |
| O  | -1.630269 | -0.279491 | -1.014975 |
| H  | -5.500527 | -0.242437 | -0.645178 |
| C  | -4.684450 | -0.292834 | 0.091969  |
| H  | -4.409992 | -0.043182 | -2.870615 |
| B  | -1.338180 | 0.190930  | 0.348230  |
| H  | -5.115024 | -0.091914 | 1.085474  |
| C  | -2.753803 | 0.399038  | -1.508504 |
| C  | -3.582938 | 0.736127  | -0.195713 |
| O  | -2.623638 | 0.690654  | 0.835872  |
| H  | -1.601520 | 1.343872  | -3.063483 |
| C  | -2.292899 | 1.655469  | -2.264419 |
| H  | -3.130173 | 2.197298  | -2.730793 |
| H  | -1.740687 | 2.341103  | -1.608781 |
| H  | -4.940611 | 2.237160  | -1.041325 |
| C  | -4.225555 | 2.125176  | -0.210655 |
| H  | -4.773476 | 2.286728  | 0.730889  |
| H  | -3.466517 | 2.914749  | -0.291729 |
| H  | 4.749033  | -1.452497 | -0.129415 |
| C  | 4.256493  | -1.368792 | -1.109548 |
| H  | 4.274484  | -0.314095 | -1.421428 |
| H  | 4.817512  | -1.966521 | -1.844659 |
| H  | 3.139485  | -3.910893 | 0.308949  |
| C  | 2.717087  | -3.740696 | -0.692506 |
| P  | 2.524841  | -1.944693 | -0.980227 |
| H  | 3.382198  | -4.194279 | -1.443776 |
| H  | 1.733374  | -4.230143 | -0.742993 |
| C  | 1.932965  | -1.853706 | -2.708395 |
| H  | 2.575860  | -2.437454 | -3.385113 |
| H  | 1.920774  | -0.803126 | -3.035062 |
| H  | 0.902696  | -2.235271 | -2.761689 |

70

Figure 3\_ts(TB) / electronic energy: -3155.86594930 a.u. / lowest freq: -80.57 cm<sup>-1</sup>

|    |           |           |           |
|----|-----------|-----------|-----------|
| H  | 3.010276  | -2.382916 | 0.118642  |
| H  | 1.683795  | -3.550734 | 0.289052  |
| O  | 0.986480  | -1.022586 | 1.231429  |
| C  | 2.428017  | -2.966919 | 0.847086  |
| H  | 3.108602  | -3.663642 | 1.360560  |
| C  | 1.764613  | -2.038365 | 1.865178  |
| H  | 3.454412  | -0.689234 | 1.957273  |
| H  | 0.067382  | -3.345104 | 2.249766  |
| C  | 2.833443  | -1.280682 | 2.648443  |
| C  | 0.860433  | -2.829879 | 2.810029  |
| H  | 2.364821  | -0.587587 | 3.363520  |
| H  | 3.486796  | -1.968789 | 3.205755  |
| H  | 0.379103  | -2.153513 | 3.532327  |
| H  | 1.437600  | -3.583696 | 3.368135  |
| Cu | 1.191646  | 0.705211  | -0.156501 |
| H  | -4.427383 | 0.766248  | -0.614487 |
| H  | -4.518683 | 0.953062  | 1.818726  |
| H  | -3.273614 | -0.182983 | 1.196620  |
| C  | -3.444824 | 0.713535  | 1.807889  |
| H  | -4.940033 | 2.443526  | -0.292598 |
| H  | -3.136606 | 0.474696  | 2.836818  |
| C  | -4.170605 | 1.821119  | -0.775127 |
| H  | -4.205093 | 2.017783  | -1.857471 |
| C  | -2.789480 | 2.154856  | -0.232080 |
| C  | -2.601465 | 1.882699  | 1.299916  |
| O  | -1.819873 | 1.275125  | -0.815333 |
| H  | -3.824652 | 3.498708  | 2.084955  |
| B  | -0.832690 | 0.986003  | 0.123485  |
| H  | -2.656331 | 2.821205  | 3.244537  |
| C  | -2.803566 | 3.100143  | 2.190308  |
| O  | -1.228345 | 1.472481  | 1.363096  |
| H  | -3.133588 | 4.320679  | -0.285336 |
| C  | -2.402291 | 3.578362  | -0.637798 |
| H  | -2.355518 | 3.636570  | -1.735582 |
| H  | -2.091022 | 3.901305  | 1.952964  |
| H  | -1.410567 | 3.846106  | -0.243686 |
| H  | 0.204209  | -4.250825 | -1.796312 |
| H  | -0.675749 | -4.205721 | 0.241701  |

|   |           |           |           |
|---|-----------|-----------|-----------|
| H | 0.503640  | -3.256638 | -3.237470 |
| C | -0.244142 | -3.509492 | -2.470797 |
| O | 0.458693  | -1.748160 | -1.013589 |
| H | -2.092610 | -4.638531 | -0.753443 |
| C | -1.697902 | -3.906637 | -0.032981 |
| H | -1.103862 | -3.973045 | -2.978655 |
| B | 0.018530  | -1.182613 | 0.206285  |
| H | -2.317693 | -3.950556 | 0.875196  |
| C | -0.662553 | -2.241330 | -1.733040 |
| C | -1.728672 | -2.480221 | -0.585246 |
| O | -1.295504 | -1.617289 | 0.465873  |
| H | -0.223704 | -0.958441 | -3.401261 |
| C | -1.089544 | -1.191204 | -2.761739 |
| H | -1.896569 | -1.564732 | -3.410033 |
| H | -1.420470 | -0.261620 | -2.282477 |
| H | -3.480699 | -2.692998 | -1.858133 |
| C | -3.151903 | -2.111553 | -0.982870 |
| H | -3.844242 | -2.329239 | -0.155058 |
| H | -3.222981 | -1.042608 | -1.218567 |
| H | 3.073834  | 3.432394  | 1.120755  |
| C | 3.095595  | 3.493894  | 0.022203  |
| H | 2.193451  | 4.031342  | -0.305906 |
| H | 3.990738  | 4.052076  | -0.293219 |
| H | 4.736915  | 1.037154  | 0.921073  |
| C | 4.694130  | 1.124469  | -0.174737 |
| P | 3.070384  | 1.803289  | -0.674895 |
| H | 5.518167  | 1.770887  | -0.515219 |
| H | 4.823307  | 0.120668  | -0.606383 |
| C | 3.271177  | 2.077403  | -2.471443 |
| H | 4.160947  | 2.686342  | -2.694837 |
| H | 2.375105  | 2.582414  | -2.861624 |
| H | 3.361485  | 1.104827  | -2.978490 |

70

Figure 3\_prod / electronic energy: -3155.88950452 a.u. / lowest freq: 21.62 cm-1

|    |           |           |           |
|----|-----------|-----------|-----------|
| H  | -1.158855 | -0.853872 | 2.044678  |
| H  | -2.081368 | 0.534440  | 1.412845  |
| O  | 0.476218  | 1.273606  | 2.005172  |
| C  | -1.632766 | 0.101521  | 2.318332  |
| H  | -2.432894 | -0.100666 | 3.046635  |
| C  | -0.605099 | 1.058362  | 2.919658  |
| H  | 0.524730  | -0.514821 | 3.893677  |
| H  | -1.708831 | 2.852240  | 2.370142  |
| C  | 0.037748  | 0.436514  | 4.155433  |
| C  | -1.246887 | 2.403039  | 3.261372  |
| H  | 0.800788  | 1.111086  | 4.572434  |
| H  | -0.716472 | 0.240474  | 4.932049  |
| H  | -0.490899 | 3.101512  | 3.652262  |
| H  | -2.026382 | 2.277814  | 4.028140  |
| Cu | -1.162098 | -1.530549 | -0.469595 |
| H  | 3.580583  | 0.620775  | -0.295027 |
| H  | 4.155902  | -0.696748 | 1.828001  |
| H  | 2.467465  | -0.158497 | 1.567577  |
| C  | 3.113119  | -1.032974 | 1.727857  |
| H  | 5.013044  | -0.445128 | -0.480147 |
| H  | 2.813949  | -1.499307 | 2.678963  |
| C  | 4.011688  | -0.207170 | -0.872112 |
| H  | 4.132527  | 0.132623  | -1.911993 |
| C  | 3.106855  | -1.430692 | -0.824697 |
| C  | 2.945747  | -2.057257 | 0.604145  |
| O  | 1.763095  | -1.042039 | -1.140811 |
| H  | 4.896752  | -2.999208 | 0.793143  |
| B  | 0.857046  | -1.733858 | -0.337362 |
| H  | 3.652152  | -3.642033 | 1.890565  |
| C  | 3.831372  | -3.266557 | 0.871685  |
| O  | 1.571398  | -2.467038 | 0.608300  |
| H  | 4.595766  | -2.740742 | -1.760293 |
| C  | 3.543447  | -2.443828 | -1.883977 |
| H  | 3.430968  | -1.987531 | -2.879035 |
| H  | 3.625644  | -4.087120 | 0.171499  |
| H  | 2.917986  | -3.348697 | -1.857648 |
| H  | -1.188959 | 4.543120  | -0.961219 |
| H  | 0.838043  | 4.659257  | 0.115279  |
| H  | -2.279828 | 3.395564  | -1.769932 |
| C  | -1.230561 | 3.715188  | -1.680966 |
| O  | -0.748295 | 2.177348  | 0.104616  |
| H  | 1.217478  | 4.989554  | -1.597762 |
| C  | 1.435817  | 4.327569  | -0.747385 |
| H  | -0.904775 | 4.086148  | -2.664441 |
| B  | 0.397248  | 1.808796  | 0.768095  |
| H  | 2.497981  | 4.443808  | -0.486318 |
| C  | -0.374050 | 2.539678  | -1.237950 |
| C  | 1.163803  | 2.862937  | -1.086359 |
| O  | 1.537557  | 2.088052  | 0.061507  |
| H  | -1.693283 | 1.038056  | -2.022193 |
| C  | -0.638926 | 1.330245  | -2.128884 |
| H  | -0.452594 | 1.559433  | -3.188203 |
| H  | -0.013144 | 0.474822  | -1.835748 |
| H  | 1.667555  | 2.926311  | -3.195542 |
| C  | 2.005995  | 2.427305  | -2.274763 |
| H  | 3.058190  | 2.701403  | -2.107369 |
| H  | 1.953583  | 1.339765  | -2.409554 |
| H  | -3.849992 | -3.526552 | -1.811768 |
| C  | -4.138767 | -2.476486 | -1.968429 |
| H  | -3.730136 | -2.151784 | -2.937054 |
| H  | -5.237257 | -2.405102 | -1.996484 |
| H  | -3.969700 | -3.065287 | 1.097540  |
| C  | -4.312146 | -2.048283 | 0.854783  |



|   |           |           |           |
|---|-----------|-----------|-----------|
| P | -3.430509 | -1.445333 | -0.632444 |
| H | -5.401729 | -2.061155 | 0.696600  |
| H | -4.080638 | -1.396766 | 1.709930  |
| C | -4.218331 | 0.182703  | -0.927440 |
| H | -5.316094 | 0.104994  | -0.887227 |
| H | -3.927434 | 0.563017  | -1.917896 |
| H | -3.880941 | 0.905727  | -0.169933 |

35

Figure 3\_L-Cu-Bpin / electronic energy: -2512.09747879 a.u. / lowest freq: 23.70 cm-1

|    |           |           |           |
|----|-----------|-----------|-----------|
| H  | -3.966569 | -2.370555 | -0.091079 |
| H  | -3.807068 | -0.481958 | -2.357598 |
| C  | -4.300635 | -1.524404 | 0.527882  |
| C  | -4.141575 | 0.306361  | -1.666690 |
| H  | -5.393074 | -1.419924 | 0.438009  |
| H  | -4.044913 | -1.745522 | 1.575060  |
| H  | -5.242483 | 0.322371  | -1.642579 |
| H  | -3.774702 | 1.270837  | -2.048864 |
| P  | -3.438874 | 0.000252  | -0.004071 |
| C  | -4.231120 | 1.295459  | 1.018181  |
| H  | -5.326265 | 1.285342  | 0.903062  |
| H  | -3.978324 | 1.134755  | 2.076846  |
| H  | -3.846004 | 2.282421  | 0.721008  |
| H  | 3.908707  | -2.418790 | -1.177398 |
| H  | 3.178529  | -2.542187 | 1.157081  |
| C  | 3.960241  | -1.319391 | -1.165315 |
| H  | 3.658664  | -0.959332 | -2.157930 |
| H  | 5.009094  | -1.032819 | -0.991557 |
| C  | 3.381449  | -1.465540 | 1.257698  |
| O  | 1.691138  | -1.070941 | -0.382227 |
| H  | 4.437392  | -1.340205 | 1.540068  |
| C  | 3.058289  | -0.772965 | -0.067653 |
| H  | 2.751180  | -1.078631 | 2.072035  |
| B  | 0.869426  | -0.027376 | 0.045169  |
| H  | 2.597061  | 1.082407  | -2.068948 |
| C  | 3.034990  | 0.788202  | 0.049573  |
| H  | 4.301435  | 1.400842  | -1.634829 |
| O  | 1.677868  | 1.040108  | 0.438088  |
| C  | 3.260011  | 1.490169  | -1.291420 |
| H  | 5.023511  | 1.114048  | 0.867358  |
| H  | 3.740760  | 0.997181  | 2.103774  |
| C  | 3.976365  | 1.366007  | 1.096660  |
| H  | 3.026918  | 2.559483  | -1.177997 |
| H  | 3.888770  | 2.463056  | 1.112142  |
| Cu | -1.167130 | -0.038843 | 0.055765  |

51

Figure 3\_para-H\_pcl / electronic energy: -2821.45221106 a.u. / lowest freq: 16.87 cm-1

|    |           |           |           |
|----|-----------|-----------|-----------|
| H  | 0.564165  | 2.801199  | 1.367690  |
| H  | -1.590737 | 1.055295  | 2.367112  |
| C  | -0.121268 | 3.208404  | 0.609283  |
| C  | -2.237026 | 1.578675  | 1.646988  |
| H  | -0.634099 | 4.092259  | 1.019570  |
| H  | 0.479762  | 3.508326  | -0.262570 |
| H  | -2.597662 | 2.516215  | 2.098075  |
| H  | -3.098493 | 0.932050  | 1.422848  |
| P  | -1.299326 | 1.901652  | 0.110146  |
| C  | -2.505786 | 2.807144  | -0.926482 |
| H  | -2.906981 | 3.691071  | -0.406638 |
| H  | -2.017095 | 3.129159  | -1.858424 |
| H  | -3.337836 | 2.135926  | -1.186586 |
| H  | -5.558352 | -1.682195 | 2.226864  |
| H  | -3.266888 | -2.642355 | 2.450043  |
| C  | -4.821344 | -1.539456 | 1.433214  |
| C  | -3.538842 | -2.077556 | 1.554708  |
| H  | -6.153183 | -0.394889 | 0.172086  |
| C  | -5.152011 | -0.818693 | 0.284574  |
| H  | 3.921807  | -1.855544 | 2.666229  |
| C  | -2.594671 | -1.894621 | 0.546832  |
| H  | 3.229154  | 0.489726  | 2.890296  |
| H  | -1.592351 | -2.311697 | 0.672755  |
| C  | -4.209149 | -0.635427 | -0.724386 |
| C  | -2.911457 | -1.164134 | -0.613976 |
| C  | 4.268902  | -1.717263 | 1.630939  |
| C  | 3.731678  | 0.700712  | 1.934521  |
| H  | 4.049362  | -2.640633 | 1.078795  |
| O  | 2.173805  | -0.778699 | 0.889763  |
| H  | -4.479364 | -0.071670 | -1.621734 |
| H  | 4.788200  | 0.925255  | 2.144587  |
| H  | 5.360339  | -1.574096 | 1.656380  |
| C  | 3.577837  | -0.510789 | 1.012748  |
| C  | -1.926922 | -0.906108 | -1.682674 |
| B  | 1.681596  | -0.168636 | -0.262242 |
| H  | -0.510868 | -2.507280 | -1.274832 |
| C  | -0.742745 | -1.614390 | -1.862876 |
| C  | 3.982318  | -0.203577 | -0.468371 |
| H  | 3.577471  | -2.238090 | -1.149898 |
| O  | 2.755695  | 0.302009  | -1.014867 |
| H  | 5.315468  | -1.879385 | -0.939899 |
| H  | 6.007977  | 0.515280  | -0.146626 |
| C  | 4.349008  | -1.461108 | -1.258337 |
| C  | -0.202315 | -1.525282 | -2.809577 |
| C  | 5.074486  | 0.843815  | -0.629415 |
| H  | 4.421469  | -1.206659 | -2.326313 |
| H  | 5.283620  | 1.003092  | -1.698059 |
| Cu | -0.293675 | 0.039165  | -0.745781 |
| H  | -2.270882 | -0.247656 | -2.487949 |
| H  | 3.263920  | 1.595594  | 1.497701  |
| H  | 4.778807  | 1.809319  | -0.198164 |

51

Figure 3\_para-H\_ts(CuBadd) / electronic energy: -2821.43913646 a.u. / lowest freq: -187.71 cm-1

|    |           |           |           |
|----|-----------|-----------|-----------|
| H  | 0.155279  | 2.399615  | 2.061692  |
| H  | -2.444870 | 1.068999  | 1.944153  |
| C  | -0.202834 | 3.120230  | 1.311597  |
| C  | -2.758664 | 1.807242  | 1.191673  |
| H  | -0.703978 | 3.958854  | 1.819815  |
| H  | 0.667735  | 3.499429  | 0.756036  |
| H  | -3.179291 | 2.688640  | 1.699907  |
| H  | -3.531297 | 1.342799  | 0.560851  |
| P  | -1.323613 | 2.257979  | 0.154888  |
| C  | -1.950167 | 3.592509  | -0.922937 |
| H  | -2.384783 | 4.412358  | -0.330805 |
| H  | -1.125164 | 3.985617  | -1.535502 |
| H  | -2.715700 | 3.183777  | -1.598779 |
| H  | -4.991156 | -2.349056 | 2.164086  |
| H  | -2.538163 | -2.404700 | 2.642179  |
| C  | -4.266041 | -2.125115 | 1.378391  |
| C  | -2.895769 | -2.154762 | 1.638768  |
| H  | -5.758879 | -1.792541 | -0.152482 |
| C  | -4.689964 | -1.811552 | 0.080399  |
| H  | 3.284658  | -1.849375 | 2.735074  |
| C  | -1.964860 | -1.868915 | 0.640938  |
| H  | 2.661768  | 0.520530  | 2.804407  |
| H  | -0.900302 | -1.892105 | 0.890864  |
| C  | -3.771122 | -1.523632 | -0.919786 |
| C  | -2.372594 | -1.524617 | -0.675530 |
| C  | 3.725912  | -1.765475 | 1.730661  |
| C  | 3.238631  | 0.681742  | 1.881788  |
| H  | 3.526791  | -2.703838 | 1.196729  |
| O  | 1.736492  | -0.801666 | 0.764990  |
| H  | -4.128502 | -1.274801 | -1.923880 |
| H  | 4.280127  | 0.897138  | 2.161741  |
| H  | 4.814252  | -1.650621 | 1.847495  |
| C  | 3.134173  | -0.567389 | 1.006024  |
| C  | -1.433479 | -1.137104 | -1.710445 |
| B  | 1.399376  | -0.195959 | -0.431172 |
| H  | 0.350880  | -2.132995 | -0.907213 |
| C  | 0.014942  | -1.305288 | -1.548576 |
| C  | 3.681332  | -0.343397 | -0.447361 |
| H  | 3.228588  | -2.385182 | -1.081991 |
| O  | 2.526223  | 0.196968  | -1.120956 |
| H  | 4.956495  | -2.097016 | -0.741278 |
| H  | 5.692777  | 0.304191  | 0.039542  |
| C  | 4.042163  | -1.647870 | -1.155809 |
| H  | 0.581576  | -1.277497 | -2.487222 |
| C  | 4.829604  | 0.646772  | -0.551447 |
| H  | 4.214697  | -1.440937 | -2.222306 |
| H  | 5.151938  | 0.737220  | -1.599469 |
| Cu | -0.486472 | 0.466506  | -0.830603 |
| H  | -1.831358 | -0.979344 | -2.716919 |
| H  | 2.822803  | 1.563721  | 1.372010  |
| H  | 4.538760  | 1.645849  | -0.201081 |

51

Figure 3\_para-H\_L-Cu-alkyl\_01 / electronic energy: -2821.49278031 a.u. / lowest freq: 25.43 cm-1

|   |           |           |           |
|---|-----------|-----------|-----------|
| H | 0.532217  | 2.955099  | 1.794118  |
| H | -1.972094 | 1.499635  | 2.306578  |
| C | -0.019501 | 3.578683  | 1.075545  |
| C | -2.462297 | 2.172866  | 1.587342  |
| H | -0.481135 | 4.421552  | 1.613081  |
| H | 0.691806  | 3.973721  | 0.335318  |
| H | -2.802042 | 3.079929  | 2.110962  |
| H | -3.332263 | 1.644697  | 1.169461  |
| P | -1.294390 | 2.570604  | 0.235458  |
| C | -2.209791 | 3.802612  | -0.758448 |
| H | -2.566847 | 4.636826  | -0.134920 |
| H | -1.554836 | 4.197924  | -1.549196 |
| H | -3.070366 | 3.314313  | -1.239415 |
| H | -4.117883 | -3.359184 | 2.041856  |
| H | -1.656795 | -3.785744 | 2.117141  |
| C | -3.454469 | -2.924955 | 1.290052  |
| C | -2.080407 | -3.158788 | 1.326609  |
| H | -5.040651 | -1.932106 | 0.202116  |
| C | -3.965191 | -2.123733 | 0.262060  |
| H | 3.178829  | -2.016399 | 2.588517  |
| C | -1.227876 | -2.607138 | 0.368108  |
| H | 1.076143  | -0.787921 | 2.430364  |
| H | -0.154774 | -2.791323 | 0.445215  |
| C | -3.119184 | -1.572244 | -0.692290 |
| C | -1.717356 | -1.784760 | -0.672122 |
| C | 3.671887  | -1.395724 | 1.825713  |
| C | 1.565632  | -0.050694 | 1.777403  |
| H | 4.356849  | -2.038136 | 1.257317  |
| O | 1.942932  | -1.778399 | 0.183941  |
| H | -3.542163 | -0.945021 | -1.484291 |
| H | 2.002594  | 0.735111  | 2.410044  |
| H | 4.261396  | -0.624756 | 2.344674  |
| C | 2.624672  | -0.755810 | 0.929481  |
| C | -0.848656 | -1.128152 | -1.678755 |
| B | 1.605860  | -1.251351 | -1.040490 |
| H | 0.428631  | -2.919401 | -1.950717 |
| C | 0.504012  | -1.814955 | -1.997277 |
| C | 3.203085  | 0.157454  | -0.216418 |
| H | 4.614064  | -1.356385 | -0.914252 |
| O | 2.285807  | -0.085242 | -1.294502 |
| H | 5.360331  | -0.060145 | 0.061115  |
| H | 3.771338  | 1.861587  | 1.010655  |

|    |           |           |           |
|----|-----------|-----------|-----------|
| C  | 4.587364  | -0.279818 | -0.689520 |
| H  | 0.785937  | -1.560809 | -3.032459 |
| C  | 3.194385  | 1.644637  | 0.099102  |
| H  | 4.839447  | 0.264448  | -1.611614 |
| H  | 3.645564  | 2.206601  | -0.732173 |
| Cu | -0.782705 | 0.690760  | -0.855766 |
| H  | -1.431115 | -1.001690 | -2.607962 |
| H  | 0.787788  | 0.398248  | 1.138264  |
| H  | 2.167246  | 2.007194  | 0.232973  |

51

Figure 3\_para-H\_L-Cu-alkyl\_02 / electronic energy: -2821.48741938 a.u. / lowest freq: 16.34 cm-1

|    |           |           |           |
|----|-----------|-----------|-----------|
| H  | 4.655816  | -2.219648 | 1.835286  |
| H  | 4.611303  | 0.697791  | 2.171188  |
| C  | 5.173151  | -2.070175 | 0.875864  |
| C  | 5.141355  | 0.777570  | 1.210565  |
| H  | 6.258281  | -2.019331 | 1.055510  |
| H  | 4.952666  | -2.932725 | 0.229407  |
| H  | 6.225835  | 0.705689  | 1.387228  |
| H  | 4.909889  | 1.759961  | 0.772885  |
| P  | 4.557339  | -0.540214 | 0.083899  |
| C  | 5.648332  | -0.359542 | -1.372856 |
| H  | 6.710407  | -0.389783 | -1.084085 |
| H  | 5.443617  | -1.171872 | -2.086018 |
| H  | 5.438181  | 0.597194  | -1.873727 |
| B  | -1.949269 | -1.175075 | 0.049555  |
| O  | -2.786331 | -1.164560 | 1.136547  |
| O  | -2.611370 | -0.859305 | -1.110698 |
| C  | -4.133223 | -0.976628 | 0.667814  |
| C  | -3.905709 | -0.344635 | -0.756373 |
| C  | -4.881232 | -0.083760 | 1.645231  |
| C  | -4.786767 | -2.356449 | 0.611264  |
| C  | -3.788057 | 1.179197  | -0.724832 |
| C  | -4.919285 | -0.768639 | -1.807545 |
| H  | -3.062286 | 1.512298  | 0.031641  |
| H  | -4.757075 | 1.657619  | -0.520708 |
| H  | -3.431186 | 1.529629  | -1.704438 |
| H  | -4.907118 | -1.854201 | -1.971572 |
| H  | -4.688871 | -0.279046 | -2.765463 |
| H  | -5.936220 | -0.469874 | -1.510793 |
| H  | -4.269155 | -3.016770 | -0.100350 |
| H  | -5.846080 | -2.293155 | 0.323295  |
| H  | -4.728621 | -2.822133 | 1.606215  |
| H  | -5.886685 | 0.150560  | 1.263679  |
| H  | -4.346166 | 0.857421  | 1.827204  |
| H  | -4.996280 | -0.599929 | 2.610168  |
| C  | 0.085937  | 2.101785  | -1.125006 |
| C  | -0.259966 | 3.401425  | -0.771255 |
| C  | 0.039849  | 1.033661  | -0.199441 |
| C  | -0.670980 | 3.700449  | 0.532054  |
| C  | -0.376461 | 1.362207  | 1.110159  |
| C  | -0.723997 | 2.665724  | 1.465990  |
| C  | 0.412980  | -0.347171 | -0.598424 |
| C  | -0.402643 | -1.459067 | 0.108159  |
| H  | -1.044212 | 2.872689  | 2.491484  |
| H  | -0.435969 | 0.577383  | 1.868020  |
| H  | -0.946655 | 4.720603  | 0.809892  |
| H  | -0.218322 | 4.192877  | -1.525294 |
| H  | 0.393298  | 1.890460  | -2.154508 |
| Cu | 2.365400  | -0.474012 | -0.310661 |
| H  | -0.096347 | -1.612041 | 1.157569  |
| H  | -0.196512 | -2.424061 | -0.389198 |
| H  | 0.246030  | -0.437480 | -1.686614 |

51

Figure 3\_para-H\_L-Cu-alkyl\_03 / electronic energy: -2821.49162681 a.u. / lowest freq: 19.82 cm-1

|   |           |           |           |
|---|-----------|-----------|-----------|
| H | -0.620601 | 3.508722  | -1.594911 |
| H | 2.202611  | 2.855307  | -2.185705 |
| C | -0.268108 | 3.845450  | -0.608980 |
| C | 2.461381  | 3.173932  | -1.164868 |
| H | 0.073631  | 4.889349  | -0.687752 |
| H | -1.108766 | 3.797132  | 0.098812  |
| H | 2.671833  | 4.254721  | -1.165006 |
| H | 3.363959  | 2.626678  | -0.854488 |
| P | 1.086718  | 2.760967  | -0.031043 |
| C | 1.596457  | 3.544697  | 1.541525  |
| H | 1.815048  | 4.614612  | 1.401297  |
| H | 0.795026  | 3.434111  | 2.287221  |
| H | 2.494274  | 3.037107  | 1.924644  |
| B | -1.592338 | -1.558278 | -0.362782 |
| O | -2.256147 | -0.773074 | -1.274830 |
| O | -2.281580 | -1.664509 | 0.819060  |
| C | -3.316977 | -0.094601 | -0.580957 |
| C | -3.564745 | -1.039504 | 0.652681  |
| C | -4.507547 | 0.063673  | -1.512518 |
| C | -2.773404 | 1.277134  | -0.183547 |
| C | -4.575338 | -2.148065 | 0.363963  |
| C | -3.936708 | -0.316106 | 1.937495  |
| H | -4.336858 | -2.677355 | -0.570667 |
| H | -5.599449 | -1.754487 | 0.289855  |
| H | -4.546922 | -2.881388 | 1.183259  |
| H | -3.147776 | 0.377411  | 2.256810  |
| H | -4.090889 | -1.047457 | 2.744849  |
| H | -4.872441 | 0.248545  | 1.808482  |
| H | -1.902914 | 1.179612  | 0.484710  |
| H | -3.534794 | 1.895310  | 0.313702  |
| H | -2.440988 | 1.801177  | -1.091249 |
| H | -5.365267 | 0.498812  | -0.977620 |
| H | -4.815906 | -0.896536 | -1.946105 |

|    |           |           |           |
|----|-----------|-----------|-----------|
| H  | -4.246364 | 0.739970  | -2.340101 |
| C  | 3.162624  | -1.442340 | 1.197011  |
| C  | 4.525376  | -1.683445 | 1.076538  |
| C  | 2.248995  | -1.741022 | 0.155808  |
| C  | 5.050184  | -2.240641 | -0.095638 |
| C  | 2.800850  | -2.321151 | -1.006209 |
| C  | 4.171705  | -2.557956 | -1.130070 |
| C  | 0.808530  | -1.416587 | 0.306130  |
| C  | -0.174250 | -2.171926 | -0.607030 |
| H  | 4.555897  | -3.004837 | -2.051880 |
| H  | 2.143711  | -2.590005 | -1.836626 |
| H  | 6.122018  | -2.427918 | -0.194602 |
| H  | 5.191869  | -1.434777 | 1.907740  |
| H  | 2.775490  | -0.998599 | 2.120523  |
| Cu | 0.747989  | 0.562531  | 0.113521  |
| H  | -0.154759 | -3.267597 | -0.429785 |
| H  | 0.073925  | -2.022971 | -1.671218 |
| H  | 0.522314  | -1.579746 | 1.361418  |

51

Figure 3\_para-H\_ts(BHE) / electronic energy: -2821.44270924 a.u. / lowest freq: -1002.20 cm-1

|    |           |           |           |
|----|-----------|-----------|-----------|
| H  | 2.587951  | -3.646098 | 1.807074  |
| H  | 4.058409  | -1.097904 | 1.423936  |
| C  | 2.553407  | -3.752480 | 0.712646  |
| C  | 3.995576  | -1.288881 | 0.342627  |
| H  | 3.461135  | -4.271341 | 0.367716  |
| H  | 1.670194  | -4.355868 | 0.454455  |
| H  | 4.846940  | -1.915932 | 0.035015  |
| H  | 4.047286  | -0.321725 | -0.180851 |
| P  | 2.403173  | -2.097410 | -0.048240 |
| C  | 2.528515  | -2.430909 | -1.841302 |
| H  | 3.432714  | -3.009155 | -2.086773 |
| H  | 1.639138  | -2.985471 | -2.175810 |
| H  | 2.553819  | -1.469384 | -2.375644 |
| B  | -1.980683 | 0.588970  | 0.321225  |
| O  | -3.020238 | 0.863809  | 1.164796  |
| O  | -2.383934 | -0.002469 | -0.844293 |
| C  | -4.184688 | 0.190091  | 0.645261  |
| C  | -3.824751 | 0.039432  | -0.878914 |
| C  | -5.418373 | 1.030572  | 0.927977  |
| C  | -4.278973 | -1.151830 | 1.369228  |
| C  | -4.215553 | 1.259273  | -1.710424 |
| C  | -4.345885 | -1.230680 | -1.530688 |
| H  | -3.858485 | 2.192050  | -1.249065 |
| H  | -5.304708 | 1.328081  | -1.843206 |
| H  | -3.752981 | 1.175280  | -2.704736 |
| H  | -3.930564 | -2.130133 | -1.057950 |
| H  | -4.066523 | -1.246804 | -2.594706 |
| H  | -5.443691 | -1.275161 | -1.468084 |
| H  | -3.393965 | -1.775839 | 1.172893  |
| H  | -5.176161 | -1.712643 | 1.070447  |
| H  | -4.331275 | -0.971074 | 2.452872  |
| H  | -6.308132 | 0.577911  | 0.464828  |
| H  | -5.309062 | 2.054967  | 0.548633  |
| H  | -5.591299 | 1.086366  | 2.012822  |
| C  | 2.545151  | 2.137114  | -1.328444 |
| C  | 3.815756  | 2.678147  | -1.176330 |
| C  | 1.752484  | 1.765002  | -0.212683 |
| C  | 4.362268  | 2.882414  | 0.096316  |
| C  | 2.322177  | 1.990728  | 1.066350  |
| C  | 3.597034  | 2.534534  | 1.210544  |
| C  | 0.451789  | 1.147547  | -0.404923 |
| C  | -0.489248 | 0.899032  | 0.668133  |
| H  | 4.000979  | 2.685144  | 2.215986  |
| H  | 1.761740  | 1.718020  | 1.964671  |
| H  | 5.360989  | 3.308863  | 0.214366  |
| H  | 4.392363  | 2.947520  | -2.066237 |
| H  | 2.141083  | 1.982835  | -2.333751 |
| Cu | 0.734034  | -0.742791 | 0.450671  |
| H  | -0.371899 | 1.493603  | 1.583245  |
| H  | -0.417834 | -0.421710 | 1.534906  |
| H  | 0.103929  | 1.027460  | -1.435301 |

51

Figure 3\_para-H\_pc2 / electronic energy: -2821.47614749 a.u. / lowest freq: 16.86 cm-1

|   |           |           |           |
|---|-----------|-----------|-----------|
| H | 1.842917  | -3.888981 | 1.419815  |
| H | 3.736870  | -1.589359 | 1.605411  |
| C | 1.847006  | -3.763772 | 0.326775  |
| C | 3.718384  | -1.595053 | 0.505336  |
| H | 2.661155  | -4.364484 | -0.107528 |
| H | 0.882443  | -4.127064 | -0.058749 |
| H | 4.448946  | -2.330571 | 0.134243  |
| H | 4.003461  | -0.593217 | 0.150769  |
| P | 2.028739  | -1.989475 | -0.073576 |
| C | 2.200418  | -1.994213 | -1.894808 |
| H | 2.980262  | -2.696951 | -2.226856 |
| H | 1.240100  | -2.279676 | -2.350019 |
| H | 2.460233  | -0.982833 | -2.239336 |
| B | -1.838132 | 0.845262  | 0.216132  |
| O | -2.894739 | 1.149042  | 1.030658  |
| O | -2.214235 | 0.144110  | -0.901874 |
| C | -4.019505 | 0.369913  | 0.578321  |
| C | -3.653392 | 0.106027  | -0.929977 |
| C | -5.297188 | 1.163928  | 0.792557  |
| C | -4.038398 | -0.907746 | 1.415503  |
| C | -4.113727 | 1.224682  | -1.862865 |
| C | -4.106619 | -1.243159 | -1.463797 |
| H | -3.814802 | 2.213691  | -1.484549 |
| H | -5.204893 | 1.216782  | -1.998258 |

|    |           |           |           |
|----|-----------|-----------|-----------|
| H  | -3.645111 | 1.084170  | -2.848150 |
| H  | -3.645562 | -2.073228 | -0.912766 |
| H  | -3.825008 | -1.341647 | -2.522780 |
| H  | -5.200621 | -1.340070 | -1.394252 |
| H  | -3.111089 | -1.484367 | 1.281235  |
| H  | -4.896289 | -1.547327 | 1.162810  |
| H  | -4.111587 | -0.638223 | 2.479256  |
| H  | -6.161445 | 0.629176  | 0.370548  |
| H  | -5.240015 | 2.158214  | 0.330854  |
| H  | -5.474811 | 1.300814  | 1.869466  |
| C  | 2.858306  | 1.680153  | -1.377626 |
| C  | 4.184116  | 2.095076  | -1.262822 |
| C  | 2.041548  | 1.545982  | -0.244300 |
| C  | 4.721870  | 2.384568  | -0.008734 |
| C  | 2.594889  | 1.845421  | 1.012292  |
| C  | 3.918758  | 2.260834  | 1.127156  |
| C  | 0.654174  | 1.054532  | -0.398902 |
| C  | -0.372109 | 1.246900  | 0.517421  |
| H  | 4.331868  | 2.479979  | 2.114655  |
| H  | 1.989931  | 1.731731  | 1.915117  |
| H  | 5.762000  | 2.705138  | 0.084916  |
| H  | 4.800236  | 2.192872  | -2.159952 |
| H  | 2.442476  | 1.457908  | -2.364334 |
| Cu | 0.403038  | -0.646099 | 0.815827  |
| H  | -0.171690 | 1.816266  | 1.432387  |
| H  | -0.363027 | -1.256048 | 2.068206  |
| H  | 0.395138  | 0.710351  | -1.407593 |

51

Figure 3 para-H<sub>ts</sub>(H>B) / electronic energy: -2821.46264111 a.u. / lowest freq: -449.57 cm<sup>-1</sup>

|    |           |           |           |
|----|-----------|-----------|-----------|
| H  | 1.908537  | 4.001781  | -1.462481 |
| H  | 3.587185  | 1.516416  | -1.704817 |
| C  | 1.974904  | 3.891650  | -0.369795 |
| C  | 3.631126  | 1.558697  | -0.606368 |
| H  | 2.872279  | 4.415685  | -0.006155 |
| H  | 1.079471  | 4.351815  | 0.073628  |
| H  | 4.441429  | 2.239367  | -0.302442 |
| H  | 3.850502  | 0.548373  | -0.229889 |
| P  | 2.020373  | 2.115891  | 0.059653  |
| C  | 2.305463  | 2.122306  | 1.864988  |
| H  | 3.180593  | 2.734507  | 2.132651  |
| H  | 1.415744  | 2.518368  | 2.376605  |
| H  | 2.470157  | 1.089872  | 2.207705  |
| B  | -1.725644 | -0.459298 | -0.418668 |
| O  | -2.813968 | -0.808383 | -1.237283 |
| O  | -2.188760 | -0.107272 | 0.869479  |
| C  | -3.990226 | -0.293363 | -0.617389 |
| C  | -3.597492 | -0.321494 | 0.906727  |
| C  | -5.170868 | -1.182955 | -0.981922 |
| C  | -4.238318 | 1.125509  | -1.136727 |
| C  | -3.837561 | -1.690794 | 1.547737  |
| C  | -4.253839 | 0.764048  | 1.748615  |
| H  | -3.404689 | -2.495767 | 0.935377  |
| H  | -4.907828 | -1.898632 | 1.696460  |
| H  | -3.344471 | -1.713118 | 2.531128  |
| H  | -3.973964 | 1.768221  | 1.403263  |
| H  | -3.934397 | 0.667788  | 2.797643  |
| H  | -5.351034 | 0.675261  | 1.720134  |
| H  | -3.421456 | 1.806818  | -0.859469 |
| H  | -5.184127 | 1.540247  | -0.757584 |
| H  | -4.292681 | 1.096842  | -2.235582 |
| H  | -6.076137 | -0.882392 | -0.431973 |
| H  | -4.962967 | -2.239473 | -0.766056 |
| H  | -5.384030 | -1.095602 | -2.058213 |
| C  | 2.861922  | -1.852598 | 1.295400  |
| C  | 4.191869  | -2.254127 | 1.176268  |
| C  | 2.048009  | -1.690876 | 0.163384  |
| C  | 4.737734  | -2.504622 | -0.082169 |
| C  | 2.611445  | -1.949363 | -1.097597 |
| C  | 3.937859  | -2.353556 | -1.217697 |
| C  | 0.662034  | -1.205235 | 0.338881  |
| C  | -0.331647 | -1.184262 | -0.605303 |
| H  | 4.357104  | -2.541962 | -2.209091 |
| H  | 2.013063  | -1.811427 | -2.001229 |
| H  | 4.804241  | -2.371495 | 2.073659  |
| H  | 2.440477  | -1.658143 | 2.285694  |
| Cu | 0.277598  | 0.828432  | -0.534224 |
| H  | -0.097670 | -1.552831 | -1.614368 |
| H  | -1.224873 | 1.030217  | -1.114772 |
| H  | 0.398571  | -0.940785 | 1.371820  |
| H  | 5.780568  | -2.814893 | -0.180387 |

51

Figure 3 para-H<sub>intl</sub> / electronic energy: -2821.46389768 a.u. / lowest freq: 24.91 cm<sup>-1</sup>

|   |           |           |           |
|---|-----------|-----------|-----------|
| H | 2.177289  | 4.048566  | -1.424842 |
| H | 3.625940  | 1.430141  | -1.702736 |
| C | 2.257418  | 3.931167  | -0.333953 |
| C | 3.697411  | 1.459631  | -0.605384 |
| H | 3.202298  | 4.378526  | 0.011393  |
| H | 1.413556  | 4.463648  | 0.129621  |
| H | 4.574655  | 2.059023  | -0.315716 |
| H | 3.829296  | 0.429622  | -0.240613 |
| P | 2.161308  | 2.158457  | 0.098955  |
| C | 2.490613  | 2.140439  | 1.896798  |
| H | 3.430512  | 2.661361  | 2.136156  |
| H | 1.659889  | 2.626576  | 2.429545  |
| H | 2.558486  | 1.097833  | 2.241696  |
| B | -1.714371 | -0.128451 | -0.460298 |
| O | -2.814246 | -0.452570 | -1.323973 |

|    |           |           |           |
|----|-----------|-----------|-----------|
| O  | -2.226113 | -0.017643 | 0.886848  |
| C  | -4.005994 | -0.168278 | -0.612144 |
| C  | -3.575856 | -0.448896 | 0.873853  |
| C  | -5.120447 | -1.069896 | -1.127227 |
| C  | -4.387913 | 1.299445  | -0.837539 |
| C  | -3.606574 | -1.944208 | 1.210609  |
| C  | -4.367180 | 0.328658  | 1.918061  |
| H  | -3.081372 | -2.531481 | 0.442492  |
| H  | -4.631358 | -2.333606 | 1.311156  |
| H  | -3.086772 | -2.100961 | 2.168100  |
| H  | -4.231593 | 1.411892  | 1.797252  |
| H  | -4.023790 | 0.058479  | 2.928791  |
| H  | -5.442778 | 0.099797  | 1.854568  |
| H  | -3.623603 | 1.980383  | -0.434609 |
| H  | -5.354945 | 1.551448  | -0.376605 |
| H  | -4.466519 | 1.483749  | -1.919950 |
| H  | -6.036237 | -0.954794 | -0.526331 |
| H  | -4.820709 | -2.126489 | -1.111470 |
| H  | -5.364086 | -0.807412 | -2.168490 |
| C  | 2.682694  | -2.080728 | 1.239809  |
| C  | 3.978619  | -2.583347 | 1.126234  |
| C  | 1.915160  | -1.789088 | 0.101856  |
| C  | 4.535571  | -2.804588 | -0.132691 |
| C  | 2.489818  | -2.018395 | -1.159495 |
| C  | 3.782385  | -2.521009 | -1.274933 |
| C  | 0.566720  | -1.204583 | 0.274671  |
| C  | -0.378525 | -0.998365 | -0.684526 |
| H  | 4.211840  | -2.685712 | -2.266230 |
| H  | 1.925525  | -1.783226 | -2.065071 |
| H  | 4.555363  | -2.803190 | 2.028038  |
| H  | 2.251687  | -1.908738 | 2.230243  |
| Cu | 0.313301  | 1.013403  | -0.435708 |
| H  | -0.134390 | -1.293231 | -1.716796 |
| H  | -1.302236 | 1.194160  | -0.823802 |
| H  | 0.298769  | -0.979468 | 1.316330  |
| H  | 5.551161  | -3.196234 | -0.226409 |

51

Figure 3\_para-H\_ts(Cu>O) / electronic energy: -2821.45732695 a.u. / lowest freq: -34.56 cm<sup>-1</sup>

|    |           |           |           |
|----|-----------|-----------|-----------|
| H  | 0.933174  | 4.432955  | -1.801058 |
| H  | 2.906194  | 2.302193  | -1.211083 |
| C  | 0.724513  | 4.482283  | -0.721986 |
| C  | 2.644537  | 2.419108  | -0.149077 |
| H  | 1.429772  | 5.182112  | -0.247780 |
| H  | -0.301845 | 4.854737  | -0.587633 |
| H  | 3.267950  | 3.209622  | 0.296376  |
| H  | 2.850774  | 1.464132  | 0.357530  |
| P  | 0.865693  | 2.809744  | -0.001458 |
| C  | 0.631703  | 3.083387  | 1.790574  |
| H  | 1.342726  | 3.825271  | 2.185770  |
| H  | -0.396378 | 3.429369  | 1.974396  |
| H  | 0.768497  | 2.128273  | 2.319672  |
| B  | -1.254056 | -0.895288 | -0.764619 |
| O  | -2.355072 | -1.742404 | -1.096282 |
| O  | -1.551994 | -0.304208 | 0.545181  |
| C  | -3.483903 | -1.264822 | -0.381190 |
| C  | -2.843298 | -0.734903 | 0.958178  |
| C  | -4.468975 | -2.411784 | -0.192053 |
| C  | -4.161223 | -0.147097 | -1.185267 |
| C  | -2.642277 | -1.848966 | 1.988295  |
| C  | -3.584052 | 0.432601  | 1.598019  |
| H  | -2.129706 | -2.711498 | 1.537445  |
| H  | -3.592621 | -2.191438 | 2.425363  |
| H  | -2.008152 | -1.469042 | 2.803664  |
| H  | -3.596381 | 1.309905  | 0.936618  |
| H  | -3.082414 | 0.724792  | 2.533458  |
| H  | -4.623869 | 0.163292  | 1.841116  |
| H  | -3.509808 | 0.731585  | -1.294066 |
| H  | -5.104417 | 0.177023  | -0.721081 |
| H  | -4.386162 | -0.524551 | -2.194304 |
| H  | -5.301241 | -2.116273 | 0.465599  |
| H  | -3.978531 | -3.295187 | 0.238127  |
| H  | -4.893151 | -2.703766 | -1.164890 |
| C  | 3.349998  | -1.375184 | 1.236713  |
| C  | 4.716659  | -1.649077 | 1.270877  |
| C  | 2.577966  | -1.651576 | 0.095868  |
| C  | 5.344365  | -2.211341 | 0.160003  |
| C  | 3.226963  | -2.218995 | -1.014442 |
| C  | 4.591084  | -2.495770 | -0.981672 |
| C  | 1.139394  | -1.319626 | 0.111177  |
| C  | 0.241628  | -1.455709 | -0.883209 |
| H  | 5.072751  | -2.938607 | -1.857080 |
| H  | 2.657767  | -2.448380 | -1.918431 |
| H  | 5.292935  | -1.423395 | 2.171708  |
| H  | 2.864010  | -0.936035 | 2.112925  |
| Cu | -0.429567 | 1.199210  | -0.787037 |
| H  | 0.580435  | -1.862551 | -1.846950 |
| H  | -1.289170 | 0.142828  | -1.723507 |
| H  | 0.780188  | -0.898407 | 1.059027  |
| H  | 6.415059  | -2.428070 | 0.182083  |

51

Figure 3\_para-H\_int2 / electronic energy: -2821.46396376 a.u. / lowest freq: 9.86 cm<sup>-1</sup>

|   |          |           |           |
|---|----------|-----------|-----------|
| H | 3.685776 | -2.794150 | -2.165296 |
| H | 2.570999 | -4.122931 | 0.174321  |
| C | 4.320752 | -2.193988 | -1.496725 |
| C | 3.222599 | -3.502408 | 0.807405  |
| H | 5.257488 | -2.738486 | -1.300829 |
| H | 4.553049 | -1.246225 | -2.004959 |

|    |           |           |           |
|----|-----------|-----------|-----------|
| H  | 4.197230  | -4.001103 | 0.922639  |
| H  | 2.748024  | -3.400787 | 1.794568  |
| P  | 3.410042  | -1.849991 | 0.050359  |
| C  | 4.669842  | -1.045022 | 1.104238  |
| H  | 5.582540  | -1.657623 | 1.171497  |
| H  | 4.929545  | -0.062326 | 0.683167  |
| H  | 4.261275  | -0.893396 | 2.114326  |
| B  | -0.306351 | 0.638997  | -0.852150 |
| O  | -0.055484 | 1.964330  | -1.372805 |
| O  | 0.224318  | 0.668159  | 0.552279  |
| C  | 0.865014  | 2.638464  | -0.542477 |
| C  | 0.587496  | 2.009974  | 0.875089  |
| C  | 0.593166  | 4.137248  | -0.613930 |
| C  | 2.294539  | 2.370478  | -1.035826 |
| C  | -0.608944 | 2.656016  | 1.574726  |
| C  | 1.790037  | 1.991094  | 1.808220  |
| H  | -1.480337 | 2.700285  | 0.905698  |
| H  | -0.381224 | 3.673346  | 1.926128  |
| H  | -0.884076 | 2.047630  | 2.449612  |
| H  | 2.608808  | 1.386630  | 1.391852  |
| H  | 1.508871  | 1.551170  | 2.777301  |
| H  | 2.165628  | 3.009260  | 1.992461  |
| H  | 2.569570  | 1.305271  | -0.955947 |
| H  | 3.042436  | 2.956154  | -0.480577 |
| H  | 2.359351  | 2.644923  | -2.099160 |
| H  | 1.213468  | 4.692185  | 0.107146  |
| H  | -0.463395 | 4.359760  | -0.414937 |
| H  | 0.829987  | 4.511020  | -1.621725 |
| C  | -4.679595 | -0.848684 | 1.249484  |
| C  | -6.015111 | -1.248478 | 1.282903  |
| C  | -4.011812 | -0.632420 | 0.032761  |
| C  | -6.716097 | -1.447388 | 0.094050  |
| C  | -4.732799 | -0.843159 | -1.155944 |
| C  | -6.066096 | -1.243002 | -1.125414 |
| C  | -2.598207 | -0.199143 | 0.053757  |
| C  | -1.830864 | 0.164684  | -0.986579 |
| H  | -6.603635 | -1.399202 | -2.064215 |
| H  | -4.242988 | -0.694308 | -2.121217 |
| H  | -6.510783 | -1.405153 | 2.244356  |
| H  | -4.138323 | -0.693895 | 2.187405  |
| Cu | 1.548818  | -0.715842 | -0.233305 |
| H  | -2.273597 | 0.140762  | -1.993539 |
| H  | 0.415914  | -0.277887 | -1.508964 |
| H  | -2.147601 | -0.161732 | 1.054333  |
| H  | -7.762797 | -1.760396 | 0.115527  |

51

Figure 3\_para-H\_ts(C-Brot) / electronic energy: -2821.45857138 a.u. / lowest freq: -89.13 cm-1

|    |           |           |           |
|----|-----------|-----------|-----------|
| H  | 3.555473  | -3.319837 | -1.684444 |
| H  | 2.888926  | -3.808986 | 1.148877  |
| C  | 4.279776  | -2.571244 | -1.330737 |
| C  | 3.609385  | -3.023905 | 1.421728  |
| H  | 5.236787  | -3.067619 | -1.107413 |
| H  | 4.431542  | -1.837625 | -2.136587 |
| H  | 4.609179  | -3.471674 | 1.531551  |
| H  | 3.297516  | -2.590821 | 2.383612  |
| P  | 3.603656  | -1.721702 | 0.139760  |
| C  | 4.972665  | -0.620386 | 0.650310  |
| H  | 5.914578  | -1.179845 | 0.761361  |
| H  | 5.112732  | 0.167699  | -0.104650 |
| H  | 4.723347  | -0.141527 | 1.608740  |
| B  | -0.334792 | 0.428686  | -0.712393 |
| O  | -0.356134 | 1.734800  | -1.319635 |
| O  | 0.310936  | 0.652099  | 0.632308  |
| C  | 0.613779  | 2.556627  | -0.706586 |
| C  | 0.621086  | 2.037238  | 0.780616  |
| C  | 0.189413  | 4.014808  | -0.847960 |
| C  | 1.969892  | 2.373226  | -1.404998 |
| C  | -0.481706 | 2.673034  | 1.627947  |
| C  | 1.959781  | 2.178994  | 1.493794  |
| H  | -1.449281 | 2.640768  | 1.108001  |
| H  | -0.256931 | 3.720741  | 1.877144  |
| H  | -0.580852 | 2.109510  | 2.567745  |
| H  | 2.749834  | 1.608204  | 0.984043  |
| H  | 1.879767  | 1.794254  | 2.522335  |
| H  | 2.270839  | 3.233624  | 1.548823  |
| H  | 2.379815  | 1.357221  | -1.282400 |
| H  | 2.721778  | 3.086399  | -1.035431 |
| H  | 1.834007  | 2.543207  | -2.483384 |
| H  | 0.843418  | 4.678978  | -0.261825 |
| H  | -0.847941 | 4.162601  | -0.520156 |
| H  | 0.252818  | 4.320931  | -1.903332 |
| C  | -5.236269 | 0.115132  | 0.662101  |
| C  | -6.504853 | -0.456962 | 0.753835  |
| C  | -4.188535 | -0.534796 | -0.010516 |
| C  | -6.756197 | -1.698283 | 0.170849  |
| C  | -4.460765 | -1.785543 | -0.592546 |
| C  | -5.725982 | -2.358697 | -0.503048 |
| C  | -2.860888 | 0.114514  | -0.079156 |
| C  | -1.754266 | -0.340717 | -0.687362 |
| H  | -5.910964 | -3.331732 | -0.965312 |
| H  | -3.670504 | -2.320978 | -1.123889 |
| H  | -7.301788 | 0.071104  | 1.283582  |
| H  | -5.048781 | 1.089478  | 1.122605  |
| Cu | 1.681888  | -0.696135 | -0.184536 |
| H  | -1.827117 | -1.311092 | -1.200350 |
| H  | 0.479473  | -0.394233 | -1.395934 |
| H  | -2.811714 | 1.079302  | 0.441700  |

|   |           |           |          |
|---|-----------|-----------|----------|
| H | -7.747901 | -2.151488 | 0.241085 |
|---|-----------|-----------|----------|

51

Figure 3\_para-H\_int3 / electronic energy: -2821.46355865 a.u. / lowest freq: 19.13 cm-1

|    |           |           |           |
|----|-----------|-----------|-----------|
| H  | 3.791442  | -2.752377 | -2.171400 |
| H  | 3.335160  | -3.828092 | 0.543063  |
| C  | 4.461911  | -2.005412 | -1.721024 |
| C  | 4.029168  | -3.057438 | 0.909892  |
| H  | 5.477539  | -2.424414 | -1.649299 |
| H  | 4.478609  | -1.122070 | -2.376797 |
| H  | 5.060624  | -3.436673 | 0.843593  |
| H  | 3.787172  | -2.849709 | 1.962772  |
| P  | 3.820684  | -1.533289 | -0.075604 |
| C  | 5.123935  | -0.429361 | 0.578451  |
| H  | 6.114671  | -0.906138 | 0.519351  |
| H  | 5.142642  | 0.505791  | -0.001026 |
| H  | 4.904054  | -0.183592 | 1.627939  |
| B  | -0.375005 | 0.236714  | -0.393982 |
| O  | -0.473468 | 1.493068  | -1.093060 |
| O  | 0.433199  | 0.546903  | 0.844282  |
| C  | 0.451475  | 2.417373  | -0.561674 |
| C  | 0.581078  | 1.962548  | 0.938734  |
| C  | -0.099612 | 3.828022  | -0.734934 |
| C  | 1.778846  | 2.304112  | -1.324033 |
| C  | -0.560926 | 2.489119  | 1.809547  |
| C  | 1.920579  | 2.282152  | 1.587364  |
| H  | -1.536289 | 2.303899  | 1.337115  |
| H  | -0.463527 | 3.566603  | 2.009502  |
| H  | -0.546281 | 1.958350  | 2.773168  |
| H  | 2.745323  | 1.759430  | 1.080959  |
| H  | 1.916338  | 1.959751  | 2.639889  |
| H  | 2.123132  | 3.363985  | 1.563529  |
| H  | 2.248925  | 1.314058  | -1.190968 |
| H  | 2.505936  | 3.068184  | -1.011523 |
| H  | 1.582622  | 2.430588  | -2.399000 |
| H  | 0.543353  | 4.571811  | -0.238833 |
| H  | -1.116125 | 3.914102  | -0.328335 |
| H  | -0.144855 | 4.079375  | -1.805645 |
| C  | -5.453498 | 0.120283  | -0.620139 |
| C  | -6.732657 | -0.395700 | -0.414820 |
| C  | -4.307904 | -0.584458 | -0.214945 |
| C  | -6.896942 | -1.634554 | 0.203606  |
| C  | -4.492925 | -1.831991 | 0.406896  |
| C  | -5.768662 | -2.349591 | 0.613034  |
| C  | -2.974610 | 0.010457  | -0.450716 |
| C  | -1.776904 | -0.485479 | -0.101367 |
| H  | -5.885551 | -3.321811 | 1.098632  |
| H  | -3.624734 | -2.408947 | 0.734107  |
| H  | -7.606545 | 0.174209  | -0.740684 |
| H  | -5.333385 | 1.092462  | -1.106719 |
| Cu | 1.792659  | -0.689487 | -0.095607 |
| H  | -1.747405 | -1.453118 | 0.422298  |
| H  | 0.341959  | -0.657962 | -1.085610 |
| H  | -2.991996 | 0.976828  | -0.971436 |
| H  | -7.897109 | -2.043894 | 0.364925  |

36

Figure 3\_para-H-alkenylBpin / electronic energy: -719.616306926 a.u. / lowest freq: 11.87 cm-1

|   |           |           |           |
|---|-----------|-----------|-----------|
| B | 0.922364  | -0.365147 | -0.028404 |
| O | 1.894117  | -1.316245 | -0.173823 |
| O | 1.433940  | 0.892512  | 0.148584  |
| C | 3.161660  | -0.695762 | 0.122071  |
| C | 2.848301  | 0.828137  | -0.120020 |
| C | 4.227554  | -1.277336 | -0.792080 |
| C | 3.487647  | -1.014695 | 1.579963  |
| C | 3.048728  | 1.254565  | -1.573413 |
| C | 3.579766  | 1.781941  | 0.809984  |
| H | 2.542480  | 0.568799  | -2.269063 |
| H | 4.114997  | 1.296474  | -1.838243 |
| H | 2.618726  | 2.256986  | -1.714756 |
| H | 3.324723  | 1.603424  | 1.862628  |
| H | 3.311513  | 2.820863  | 0.566919  |
| H | 4.668438  | 1.676163  | 0.689783  |
| H | 2.735025  | -0.594781 | 2.263998  |
| H | 4.475038  | -0.625732 | 1.866988  |
| H | 3.496130  | -2.106186 | 1.715677  |
| H | 5.185806  | -0.755417 | -0.649802 |
| H | 3.942879  | -1.205244 | -1.849722 |
| H | 4.382907  | -2.340283 | -0.555288 |
| C | -3.806743 | 1.248461  | 0.192092  |
| C | -5.197110 | 1.149758  | 0.183811  |
| C | -2.998838 | 0.113525  | 0.018524  |
| C | -5.806490 | -0.090352 | -0.001273 |
| C | -3.628094 | -1.129019 | -0.169041 |
| C | -5.016012 | -1.228789 | -0.178362 |
| C | -1.532965 | 0.275159  | 0.038943  |
| C | -0.597425 | -0.686080 | -0.066780 |
| H | -5.487864 | -2.203239 | -0.325431 |
| H | -3.028632 | -2.030869 | -0.311211 |
| H | -6.895940 | -0.172912 | -0.008967 |
| H | -5.805802 | 2.046357  | 0.322501  |
| H | -3.332001 | 2.222916  | 0.336640  |
| H | -0.908917 | -1.730947 | -0.184153 |
| H | -1.195659 | 1.312156  | 0.158923  |

51

Figure 3\_para-H\_pc2\_rev / electronic energy: -2821.47379868 a.u. / lowest freq: 7.91 cm-1

|   |           |          |           |
|---|-----------|----------|-----------|
| H | -1.891178 | 3.978014 | -0.931188 |
| H | 0.744047  | 3.624321 | -2.162854 |
| C | -1.423624 | 3.847381 | 0.056070  |



|    |           |           |           |
|----|-----------|-----------|-----------|
| C  | 1.151378  | 3.545628  | -1.143938 |
| H  | -1.079604 | 4.824743  | 0.429409  |
| H  | -2.184530 | 3.446734  | 0.742937  |
| H  | 1.348260  | 4.555441  | -0.751758 |
| H  | 2.097993  | 2.988858  | -1.192969 |
| P  | -0.044323 | 2.653433  | -0.087134 |
| C  | 0.722927  | 2.708951  | 1.571856  |
| H  | 1.104996  | 3.713018  | 1.812745  |
| H  | -0.030718 | 2.423580  | 2.321600  |
| H  | 1.536897  | 1.971636  | 1.621928  |
| B  | 1.102592  | -0.917294 | 0.434901  |
| O  | 2.077244  | -0.385678 | 1.240564  |
| O  | 1.619144  | -1.663471 | -0.591113 |
| C  | 3.341842  | -0.590656 | 0.577678  |
| C  | 3.030149  | -1.822737 | -0.347978 |
| C  | 4.419115  | -0.828932 | 1.621918  |
| C  | 3.642515  | 0.678496  | -0.217408 |
| C  | 3.217667  | -3.162541 | 0.361369  |
| C  | 3.768633  | -1.824250 | -1.676306 |
| H  | 2.700440  | -3.180345 | 1.332312  |
| H  | 4.281459  | -3.384639 | 0.527720  |
| H  | 2.792959  | -3.961665 | -0.263554 |
| H  | 3.510439  | -0.949604 | -2.287383 |
| H  | 3.503685  | -2.725677 | -2.248492 |
| H  | 4.856875  | -1.832938 | -1.513446 |
| H  | 2.868808  | 0.861297  | -0.978421 |
| H  | 4.617661  | 0.617777  | -0.720916 |
| H  | 3.665851  | 1.539695  | 0.466539  |
| H  | 5.375239  | -1.082784 | 1.140221  |
| H  | 4.145585  | -1.638707 | 2.310567  |
| H  | 4.570256  | 0.085147  | 2.214904  |
| C  | -3.617294 | -2.197209 | -0.667879 |
| C  | -4.991323 | -2.269942 | -0.448642 |
| C  | -2.817753 | -1.296165 | 0.051025  |
| C  | -5.595783 | -1.436609 | 0.492725  |
| C  | -3.440203 | -0.459363 | 0.992321  |
| C  | -4.813321 | -0.530049 | 1.210661  |
| C  | -1.359240 | -1.259465 | -0.201703 |
| C  | -0.416609 | -0.694550 | 0.649415  |
| H  | -5.278382 | 0.132255  | 1.945004  |
| H  | -2.846450 | 0.266451  | 1.553338  |
| H  | -6.673261 | -1.490682 | 0.665071  |
| H  | -5.594624 | -2.980078 | -1.019309 |
| H  | -3.149664 | -2.849674 | -1.410087 |
| Cu | -0.861513 | 0.660040  | -0.871013 |
| H  | -0.747026 | -0.236954 | 1.588859  |
| H  | -1.585117 | 0.803311  | -2.288746 |
| H  | -1.010698 | -1.929456 | -0.994853 |

51

Figure 3 para-H<sub>ts</sub>(CuHadd\_rev) / electronic energy: -2821.44750747 a.u. / lowest freq: -855.62 cm<sup>-1</sup>

|   |           |           |           |
|---|-----------|-----------|-----------|
| H | -1.330551 | 4.368876  | -1.136190 |
| H | 1.158195  | 3.399148  | -2.330387 |
| C | -0.826994 | 4.346554  | -0.158696 |
| C | 1.606738  | 3.370838  | -1.326658 |
| H | -0.300223 | 5.299961  | 0.002086  |
| H | -1.595927 | 4.224235  | 0.618919  |
| H | 2.050826  | 4.351962  | -1.099259 |
| H | 2.398031  | 2.606747  | -1.325252 |
| P | 0.324426  | 2.927325  | -0.103469 |
| C | 1.167391  | 3.143064  | 1.503663  |
| H | 1.603931  | 4.148955  | 1.603105  |
| H | 0.441570  | 2.977998  | 2.313962  |
| H | 1.960141  | 2.387561  | 1.601059  |
| B | 0.867817  | -1.151517 | 0.394912  |
| O | 1.813088  | -1.205805 | 1.408948  |
| O | 1.446995  | -1.423180 | -0.840481 |
| C | 3.105293  | -1.255184 | 0.793770  |
| C | 2.781319  | -1.886734 | -0.607765 |
| C | 4.044685  | -2.078555 | 1.660496  |
| C | 3.613888  | 0.182142  | 0.678939  |
| C | 2.738673  | -3.414709 | -0.569790 |
| C | 3.681629  | -1.417980 | -1.740777 |
| H | 2.112156  | -3.776817 | 0.259174  |
| H | 3.742881  | -3.850929 | -0.463899 |
| H | 2.301443  | -3.783682 | -1.509424 |
| H | 3.590980  | -0.336286 | -1.907499 |
| H | 3.402524  | -1.926871 | -2.675572 |
| H | 4.735587  | -1.653775 | -1.527860 |
| H | 2.949901  | 0.782358  | 0.038053  |
| H | 4.631742  | 0.228547  | 0.265422  |
| H | 3.629132  | 0.639600  | 1.679355  |
| H | 5.015547  | -2.219918 | 1.161478  |
| H | 3.620080  | -3.065087 | 1.888164  |
| H | 4.225179  | -1.561132 | 2.614682  |
| C | -3.696575 | -2.160240 | -0.695928 |
| C | -5.037964 | -2.373073 | -0.373534 |
| C | -3.005899 | -1.054783 | -0.188479 |
| C | -5.708398 | -1.480806 | 0.461591  |
| C | -3.690662 | -0.160967 | 0.645970  |
| C | -5.028328 | -0.371733 | 0.970540  |
| C | -1.554119 | -0.870335 | -0.505079 |
| C | -0.604145 | -0.843195 | 0.588872  |
| H | -5.547974 | 0.337775  | 1.619359  |
| H | -3.165645 | 0.717370  | 1.033337  |
| H | -6.759343 | -1.644468 | 0.711554  |
| H | -5.560324 | -3.242599 | -0.780094 |
| H | -3.175606 | -2.864784 | -1.349943 |

|    |           |           |           |
|----|-----------|-----------|-----------|
| Cu | -0.652452 | 0.961645  | -0.409202 |
| H  | -1.001567 | -0.666295 | 1.595801  |
| H  | -1.781161 | 0.504844  | -1.439332 |
| H  | -1.235758 | -1.437226 | -1.387004 |

51

Figure 3\_para-H\_L-Cu-alkyl\_rev / electronic energy: -2821.50134039 a.u. / lowest freq: 25.16 cm-1

|    |           |           |           |
|----|-----------|-----------|-----------|
| H  | 3.749134  | 1.612199  | -0.357362 |
| H  | 2.302766  | 1.652954  | 2.199722  |
| C  | 3.117850  | 2.461184  | -0.661479 |
| C  | 1.662024  | 2.456293  | 1.806879  |
| H  | 3.568339  | 3.399532  | -0.302631 |
| H  | 3.076063  | 2.476206  | -1.760949 |
| H  | 2.125722  | 3.429969  | 2.028412  |
| H  | 0.686677  | 2.395086  | 2.312548  |
| P  | 1.434052  | 2.221375  | 0.007930  |
| C  | 0.543286  | 3.736150  | -0.500092 |
| H  | 1.113208  | 4.642479  | -0.242463 |
| H  | 0.368830  | 3.714629  | -1.586087 |
| H  | -0.433743 | 3.773554  | 0.004356  |
| B  | -1.580959 | -1.098638 | -0.554028 |
| O  | -2.515107 | -0.428762 | -1.354234 |
| O  | -2.066660 | -1.204020 | 0.754091  |
| C  | -3.405971 | 0.256803  | -0.475347 |
| C  | -3.389440 | -0.669889 | 0.792066  |
| C  | -4.766674 | 0.406720  | -1.137351 |
| C  | -2.804476 | 1.639291  | -0.197651 |
| C  | -4.370094 | -1.838573 | 0.677503  |
| C  | -3.599878 | 0.057501  | 2.112669  |
| H  | -4.260113 | -2.354822 | -0.287787 |
| H  | -5.415581 | -1.513036 | 0.784491  |
| H  | -4.153060 | -2.564703 | 1.475228  |
| H  | -2.805575 | 0.792709  | 2.299499  |
| H  | -3.590630 | -0.665518 | 2.942252  |
| H  | -4.570395 | 0.577259  | 2.126469  |
| H  | -1.829739 | 1.547851  | 0.307219  |
| H  | -3.463978 | 2.265985  | 0.420762  |
| H  | -2.637546 | 2.152816  | -1.156567 |
| H  | -5.501428 | 0.823695  | -0.431284 |
| H  | -5.143607 | -0.555932 | -1.507873 |
| H  | -4.694390 | 1.092827  | -1.994881 |
| C  | 3.005321  | -2.385335 | -0.908308 |
| C  | 4.301228  | -1.906269 | -0.710803 |
| C  | 2.009907  | -2.199475 | 0.059724  |
| C  | 4.632044  | -1.236162 | 0.468100  |
| C  | 2.360149  | -1.532348 | 1.243264  |
| C  | 3.654961  | -1.056814 | 1.449306  |
| C  | 0.571751  | -2.597904 | -0.201968 |
| C  | -0.207051 | -1.545355 | -1.002127 |
| H  | 3.904198  | -0.544855 | 2.382675  |
| H  | 1.597069  | -1.378805 | 2.012852  |
| H  | 5.646758  | -0.861941 | 0.624414  |
| H  | 5.060175  | -2.058525 | -1.482869 |
| H  | 2.756682  | -2.903958 | -1.839126 |
| Cu | 0.521828  | 0.275183  | -0.564290 |
| H  | -0.069866 | -1.635357 | -2.093205 |
| H  | 0.076223  | -2.756294 | 0.769299  |
| H  | 0.563335  | -3.576370 | -0.716694 |

72

Figure 3\_para-H\_pc3\_01 / electronic energy: -3660.33447417 a.u. / lowest freq: 14.60 cm-1

|   |           |           |           |
|---|-----------|-----------|-----------|
| C | 0.916980  | -0.936335 | -0.680959 |
| C | 1.192007  | -0.785498 | 0.670668  |
| C | 2.307941  | 0.096830  | 1.153532  |
| O | 3.573582  | -0.598356 | 1.177527  |
| P | 4.383558  | -0.816841 | -0.184189 |
| O | 4.248086  | 0.226628  | -1.221642 |
| O | 5.836892  | -1.033019 | 0.457107  |
| O | 3.965376  | -2.255928 | -0.758277 |
| C | 6.928571  | -1.360565 | -0.396663 |
| H | 0.331528  | -1.784672 | -1.047871 |
| H | 1.511536  | -0.405558 | -1.431718 |
| H | 0.824154  | -1.531213 | 1.385330  |
| H | 2.410385  | 0.992672  | 0.521698  |
| H | 2.145686  | 0.417487  | 2.190332  |
| B | -3.195507 | -0.502407 | -1.040797 |
| O | -3.802702 | -0.822203 | 0.153771  |
| O | -2.806899 | -1.623571 | -1.728763 |
| C | -3.563938 | -2.215298 | 0.412429  |
| C | -3.299495 | -2.780724 | -1.033226 |
| C | -4.768788 | -2.813562 | 1.119792  |
| C | -2.334766 | -2.286167 | 1.316957  |
| C | -4.576558 | -3.222999 | -1.744981 |
| C | -2.252674 | -3.881750 | -1.099243 |
| H | -5.349837 | -2.441641 | -1.702441 |
| H | -4.988209 | -4.145273 | -1.309955 |
| H | -4.348185 | -3.414656 | -2.803702 |
| H | -1.278351 | -3.537964 | -0.726937 |
| H | -2.120556 | -4.208815 | -2.141123 |
| H | -2.566391 | -4.754332 | -0.506158 |
| H | -1.466838 | -1.812330 | 0.833926  |
| H | -2.074056 | -3.320890 | 1.581163  |
| H | -2.544001 | -1.738474 | 2.247459  |
| H | -4.638005 | -3.897460 | 1.257388  |
| H | -5.698898 | -2.639672 | 0.563398  |
| H | -4.881576 | -2.357410 | 2.114700  |
| C | 0.507164  | 2.787395  | -1.809659 |
| C | 1.071561  | 4.051871  | -1.699897 |
| C | -0.859492 | 2.541968  | -1.517122 |

|    |           |           |           |
|----|-----------|-----------|-----------|
| C  | 0.296499  | 5.148622  | -1.303020 |
| C  | -1.624907 | 3.671349  | -1.151266 |
| C  | -1.056779 | 4.942584  | -1.041280 |
| C  | -1.384136 | 1.158617  | -1.531262 |
| C  | -2.908153 | 0.968330  | -1.491809 |
| H  | -1.689587 | 5.785959  | -0.749018 |
| H  | -2.691320 | 3.555047  | -0.946639 |
| H  | 0.740949  | 6.142423  | -1.211638 |
| H  | 2.132936  | 4.187107  | -1.927110 |
| H  | 1.138112  | 1.947451  | -2.117716 |
| Cu | -0.397686 | 0.408786  | 0.087142  |
| H  | -3.392644 | 1.221449  | -2.457210 |
| H  | -3.368392 | 1.623933  | -0.735596 |
| H  | -0.956800 | 0.606479  | -2.383466 |
| H  | 7.833938  | -1.367533 | 0.222827  |
| H  | 7.043147  | -0.612049 | -1.195455 |
| H  | 6.793573  | -2.355738 | -0.849566 |
| C  | 3.845319  | -3.388929 | 0.090570  |
| H  | 3.873347  | -4.281053 | -0.548241 |
| H  | 2.888409  | -3.364958 | 0.633840  |
| H  | 4.672147  | -3.441716 | 0.815783  |
| H  | 0.990944  | 2.822909  | 2.378122  |
| H  | -0.236855 | 3.681235  | 1.413184  |
| H  | -0.431930 | 3.548286  | 3.193516  |
| C  | -0.085925 | 3.028588  | 2.286483  |
| H  | 0.336172  | 0.319730  | 3.718503  |
| P  | -0.991114 | 1.460857  | 2.026887  |
| H  | -1.053700 | 1.165295  | 4.465862  |
| C  | -0.730077 | 0.564760  | 3.601162  |
| H  | -2.952918 | 2.702221  | 1.348057  |
| H  | -2.991443 | 2.384596  | 3.110900  |
| C  | -2.747009 | 1.954289  | 2.127488  |
| H  | -1.299050 | -0.377019 | 3.588987  |
| H  | -3.378411 | 1.074483  | 1.933030  |

72

Figure 3 para-H\_pc3\_02 / electronic energy: -3660.33292348 a.u. / lowest freq: 26.47 cm<sup>-1</sup>

|    |           |           |           |
|----|-----------|-----------|-----------|
| C  | -0.154708 | -1.252905 | -1.354020 |
| C  | 0.178896  | -2.077433 | -0.294226 |
| C  | 1.408472  | -1.870612 | 0.537763  |
| O  | 2.570565  | -2.473494 | -0.075849 |
| P  | 3.692823  | -1.556991 | -0.741713 |
| O  | 3.307758  | -0.650192 | -1.842733 |
| O  | 4.283952  | -0.813515 | 0.560888  |
| O  | 4.788510  | -2.624706 | -1.188181 |
| C  | 5.210865  | 0.255353  | 0.409755  |
| H  | -0.854162 | -1.592225 | -2.124518 |
| H  | 0.462354  | -0.382323 | -1.605530 |
| H  | -0.279398 | -3.071592 | -0.229545 |
| H  | 1.598785  | -0.801528 | 0.704256  |
| H  | 1.310075  | -2.354616 | 1.517721  |
| B  | -0.859559 | 2.387265  | -1.009868 |
| O  | 0.415964  | 2.352909  | -1.516756 |
| O  | -0.943816 | 3.190579  | 0.103017  |
| C  | 1.288938  | 2.990194  | -0.568801 |
| C  | 0.294848  | 3.917124  | 0.217147  |
| C  | 2.396044  | 3.715592  | -1.314815 |
| C  | 1.877873  | 1.880302  | 0.298383  |
| C  | 0.085548  | 5.272117  | -0.457144 |
| C  | 0.636217  | 4.115643  | 1.684640  |
| H  | -0.139911 | 5.157082  | -1.527879 |
| H  | 0.970203  | 5.916910  | -0.354821 |
| H  | -0.767389 | 5.780589  | 0.015998  |
| H  | 0.674811  | 3.164750  | 2.230488  |
| H  | -0.123750 | 4.752165  | 2.161759  |
| H  | 1.610997  | 4.615945  | 1.788685  |
| H  | 1.083415  | 1.363015  | 0.858584  |
| H  | 2.616591  | 2.264135  | 1.016931  |
| H  | 2.369280  | 1.150272  | -0.359945 |
| H  | 3.033866  | 4.277038  | -0.615373 |
| H  | 1.996607  | 4.414447  | -2.061709 |
| H  | 3.026427  | 2.983825  | -1.841504 |
| C  | -4.622545 | -0.894236 | -0.207497 |
| C  | -5.542502 | -1.852202 | -0.619920 |
| C  | -3.655092 | -0.348803 | -1.087737 |
| C  | -5.549547 | -2.313024 | -1.940364 |
| C  | -3.698289 | -0.817719 | -2.421365 |
| C  | -4.619730 | -1.780254 | -2.833763 |
| C  | -2.642039 | 0.608602  | -0.594480 |
| C  | -2.048624 | 1.576948  | -1.625606 |
| H  | -4.612539 | -2.113802 | -3.875753 |
| H  | -2.990563 | -0.422290 | -3.153551 |
| H  | -6.272654 | -3.064095 | -2.266822 |
| H  | -6.272291 | -2.239335 | 0.097489  |
| H  | -4.645444 | -0.541426 | 0.827148  |
| Cu | -1.312094 | -0.702322 | 0.228025  |
| H  | -2.817630 | 2.268541  | -2.032720 |
| H  | -1.640357 | 1.035273  | -2.494274 |
| H  | -3.059896 | 1.176550  | 0.253776  |
| H  | 5.328101  | 0.726330  | 1.393867  |
| H  | 4.844842  | 1.001231  | -0.311176 |
| H  | 6.189226  | -0.121994 | 0.072399  |
| C  | 5.314760  | -3.594773 | -0.288605 |
| H  | 6.215034  | -4.012988 | -0.755615 |
| H  | 4.585718  | -4.400286 | -0.117373 |
| H  | 5.587237  | -3.137353 | 0.674648  |
| H  | 0.565130  | 0.434578  | 3.007558  |
| H  | -0.794942 | 1.543950  | 2.683397  |

|   |           |           |          |
|---|-----------|-----------|----------|
| H | -0.662141 | 0.733565  | 4.279978 |
| C | -0.503393 | 0.615896  | 3.196779 |
| H | 0.088050  | -2.403308 | 3.356051 |
| P | -1.499503 | -0.758144 | 2.511923 |
| H | -1.148926 | -2.017719 | 4.591171 |
| C | -0.979976 | -2.197795 | 3.518074 |
| H | -3.561181 | 0.511581  | 2.711028 |
| H | -3.126615 | -0.255072 | 4.271717 |
| C | -3.163975 | -0.400124 | 3.180865 |
| H | -1.550651 | -3.086690 | 3.209071 |
| H | -3.843320 | -1.235070 | 2.954397 |

72

Figure 3\_para-H\_ts(AS)\_01 / electronic energy: -3660.29889725 a.u. / lowest freq: -278.04 cm<sup>-1</sup>

|    |           |           |           |
|----|-----------|-----------|-----------|
| C  | 0.009580  | -1.218146 | 1.559352  |
| C  | -0.156334 | -2.287634 | 0.645735  |
| C  | -0.834340 | -2.122161 | -0.565171 |
| O  | -2.783091 | -2.866887 | -0.356910 |
| P  | -3.710907 | -1.688293 | -0.079721 |
| O  | -3.705953 | -0.483287 | -0.965700 |
| O  | -5.194990 | -2.356838 | 0.041364  |
| O  | -3.438936 | -1.153105 | 1.447266  |
| C  | -6.301835 | -1.502515 | 0.233828  |
| H  | 0.480985  | -1.408760 | 2.526217  |
| H  | -0.663837 | -0.356169 | 1.509822  |
| H  | 0.307329  | -3.256704 | 0.855069  |
| H  | -1.229260 | -1.142312 | -0.847431 |
| H  | -0.732489 | -2.858755 | -1.359301 |
| B  | 0.650489  | 2.521291  | 0.224810  |
| O  | 0.408568  | 3.839540  | -0.053561 |
| O  | -0.504726 | 1.797080  | 0.346516  |
| C  | -1.005733 | 4.072120  | 0.108748  |
| C  | -1.608142 | 2.630905  | -0.071839 |
| C  | -1.466828 | 5.086364  | -0.924563 |
| C  | -1.205845 | 4.630324  | 1.517012  |
| C  | -1.909595 | 2.278477  | -1.526398 |
| C  | -2.819042 | 2.323561  | 0.793111  |
| H  | -1.037750 | 2.458316  | -2.174203 |
| H  | -2.751613 | 2.872703  | -1.910289 |
| H  | -2.205572 | 1.220248  | -1.579630 |
| H  | -2.581414 | 2.389812  | 1.863452  |
| H  | -3.177278 | 1.308526  | 0.569919  |
| H  | -3.633005 | 3.031634  | 0.572160  |
| H  | -0.885459 | 3.909547  | 2.284041  |
| H  | -2.257760 | 4.890225  | 1.702655  |
| H  | -0.600617 | 5.541435  | 1.633019  |
| H  | -2.558076 | 5.219194  | -0.874929 |
| H  | -1.197811 | 4.781425  | -1.944409 |
| H  | -0.996777 | 6.061334  | -0.726853 |
| C  | 3.738727  | -1.051048 | 2.199080  |
| C  | 4.976487  | -1.661551 | 2.367369  |
| C  | 3.545408  | -0.006972 | 1.267857  |
| C  | 6.076845  | -1.251748 | 1.607774  |
| C  | 4.669833  | 0.401068  | 0.527095  |
| C  | 5.912393  | -0.214828 | 0.691347  |
| C  | 2.193322  | 0.593281  | 1.097602  |
| C  | 2.098471  | 1.924869  | 0.362198  |
| H  | 6.763860  | 0.129126  | 0.097618  |
| H  | 4.577217  | 1.218320  | -0.190467 |
| H  | 7.049916  | -1.731368 | 1.736762  |
| H  | 5.086897  | -2.464258 | 3.101444  |
| H  | 2.887491  | -1.386186 | 2.799489  |
| Cu | 1.237238  | -0.823458 | 0.040873  |
| H  | 2.492645  | 1.851047  | -0.668736 |
| H  | 2.737320  | 2.692813  | 0.844190  |
| H  | 1.714620  | 0.679970  | 2.082504  |
| H  | -7.212794 | -2.117377 | 0.206251  |
| H  | -6.360482 | -0.737714 | -0.557313 |
| H  | -6.253575 | -0.989419 | 1.209855  |
| C  | -3.312862 | -2.081007 | 2.499472  |
| H  | -2.939638 | -1.544549 | 3.383769  |
| H  | -2.606157 | -2.887229 | 2.244958  |
| H  | -4.284377 | -2.540757 | 2.751545  |
| H  | -0.303231 | -0.749257 | -3.177627 |
| H  | 0.493736  | 0.833348  | -2.996619 |
| H  | 0.986728  | -0.265764 | -4.325242 |
| C  | 0.654305  | -0.218068 | -3.277027 |
| H  | 1.182274  | -3.231751 | -2.629941 |
| P  | 1.897747  | -0.955839 | -2.160558 |
| H  | 2.367718  | -2.663453 | -3.849433 |
| C  | 2.109969  | -2.661403 | -2.779199 |
| H  | 3.406589  | 0.929941  | -2.473821 |
| H  | 3.629639  | -0.313436 | -3.743092 |
| C  | 3.454272  | -0.150855 | -2.668531 |
| H  | 2.914325  | -3.155136 | -2.213466 |
| H  | 4.293410  | -0.573023 | -2.098019 |

72

Figure 3\_para-H\_ts(AS)\_02 / electronic energy: -3660.30030627 a.u. / lowest freq: -282.42 cm<sup>-1</sup>

|   |           |           |           |
|---|-----------|-----------|-----------|
| C | 0.530275  | -1.255921 | -0.520077 |
| C | 0.721628  | -1.392169 | 0.884545  |
| C | 1.605091  | -0.556600 | 1.573315  |
| O | 3.523918  | -1.392439 | 1.543431  |
| P | 4.130298  | -1.158353 | 0.162594  |
| O | 3.609721  | -0.069345 | -0.724757 |
| O | 5.731798  | -1.000227 | 0.440597  |
| O | 4.061226  | -2.549755 | -0.695401 |
| C | 6.586608  | -0.730202 | -0.649030 |
| H | -0.141229 | -1.941745 | -1.042953 |

|    |           |           |           |
|----|-----------|-----------|-----------|
| H  | 1.352665  | -0.837491 | -1.108721 |
| H  | 0.167611  | -2.149762 | 1.447274  |
| H  | 2.050511  | 0.300963  | 1.066945  |
| H  | 1.626007  | -0.559549 | 2.662783  |
| B  | -3.023207 | -0.280186 | -1.277507 |
| O  | -3.952276 | -0.290622 | -0.267005 |
| O  | -2.678206 | -1.543076 | -1.676952 |
| C  | -4.038000 | -1.634269 | 0.240466  |
| C  | -3.505375 | -2.487639 | -0.973014 |
| C  | -5.472566 | -1.931687 | 0.644801  |
| C  | -3.124722 | -1.685938 | 1.463168  |
| C  | -4.609216 | -2.921756 | -1.934000 |
| C  | -2.656692 | -3.684403 | -0.572754 |
| H  | -5.233861 | -2.069482 | -2.240329 |
| H  | -5.258401 | -3.688131 | -1.487114 |
| H  | -4.150036 | -3.346164 | -2.838778 |
| H  | -1.772422 | -3.382959 | 0.004490  |
| H  | -2.309260 | -4.212539 | -1.472802 |
| H  | -3.244064 | -4.391113 | 0.032529  |
| H  | -2.090871 | -1.416968 | 1.193891  |
| H  | -3.120155 | -2.676842 | 1.938434  |
| H  | -3.481598 | -0.953478 | 2.202087  |
| H  | -5.579207 | -2.982584 | 0.952922  |
| H  | -6.176218 | -1.733868 | -0.174114 |
| H  | -5.758964 | -1.298264 | 1.497509  |
| C  | 1.305708  | 2.272901  | -1.435120 |
| C  | 2.031276  | 3.456546  | -1.352615 |
| C  | -0.103735 | 2.279734  | -1.551051 |
| C  | 1.383880  | 4.695213  | -1.388513 |
| C  | -0.734521 | 3.536226  | -1.598127 |
| C  | -0.002969 | 4.723591  | -1.518376 |
| C  | -0.855678 | 0.988147  | -1.573217 |
| C  | -2.366159 | 1.037575  | -1.814816 |
| H  | -0.528458 | 5.681437  | -1.563099 |
| H  | -1.818550 | 3.596694  | -1.712034 |
| H  | 1.954491  | 5.624489  | -1.320741 |
| H  | 3.118919  | 3.406876  | -1.253044 |
| H  | 1.854428  | 1.326711  | -1.381924 |
| Cu | -0.407425 | 0.290391  | 0.274529  |
| H  | -2.586785 | 1.201044  | -2.887658 |
| H  | -2.832534 | 1.872170  | -1.270790 |
| H  | -0.388784 | 0.304468  | -2.293065 |
| H  | 7.609741  | -0.637866 | -0.257736 |
| H  | 6.310372  | 0.209633  | -1.154356 |
| H  | 6.566335  | -1.543820 | -1.394575 |
| C  | 4.399551  | -3.764096 | -0.065686 |
| H  | 4.355526  | -4.560137 | -0.822784 |
| H  | 3.698589  | -4.005947 | 0.749958  |
| H  | 5.420859  | -3.735773 | 0.352239  |
| H  | 1.015282  | 2.734443  | 2.404710  |
| H  | 0.169674  | 3.660907  | 1.136712  |
| H  | -0.322721 | 3.842538  | 2.852541  |
| C  | 0.038283  | 3.132453  | 2.092687  |
| H  | -0.379112 | 0.640692  | 3.887158  |
| P  | -1.132876 | 1.751996  | 1.866415  |
| H  | -1.647679 | 1.852791  | 4.257926  |
| C  | -1.333095 | 1.071214  | 3.549532  |
| H  | -2.632523 | 3.188808  | 0.632138  |
| H  | -3.040818 | 3.192139  | 2.376334  |
| C  | -2.731535 | 2.561053  | 1.529188  |
| H  | -2.088762 | 0.272373  | 3.538159  |
| H  | -3.495617 | 1.794122  | 1.333788  |

72

Figure 3 para-H\_pi-allyl\_01 / electronic energy: -3660.32333278 a.u. / lowest freq: 24.00 cm-1

|   |           |           |           |
|---|-----------|-----------|-----------|
| C | -0.120800 | -1.531426 | -1.506721 |
| C | -0.608322 | -2.293013 | -0.410657 |
| C | 0.044011  | -2.269962 | 0.810284  |
| O | 2.972569  | -1.189920 | 1.035550  |
| P | 3.714950  | -1.347226 | -0.266303 |
| O | 3.010066  | -1.368631 | -1.594862 |
| O | 4.879370  | -0.184617 | -0.265166 |
| O | 4.629618  | -2.711639 | -0.216973 |
| C | 5.749634  | -0.107727 | -1.367942 |
| H | -0.744938 | -1.449979 | -2.398300 |
| H | 0.970629  | -1.414056 | -1.629005 |
| H | -1.635753 | -2.666218 | -0.456958 |
| H | 1.114480  | -2.010201 | 0.891747  |
| H | -0.441341 | -2.707662 | 1.686886  |
| B | -3.094251 | 0.655121  | -0.812699 |
| O | -3.970758 | 0.781904  | 0.232733  |
| O | -3.297215 | -0.495730 | -1.525968 |
| C | -4.697089 | -0.456735 | 0.354388  |
| C | -4.553921 | -1.059779 | -1.089966 |
| C | -6.125073 | -0.162893 | 0.781822  |
| C | -3.982223 | -1.281258 | 1.423794  |
| C | -5.623092 | -0.553720 | -2.056679 |
| C | -4.484020 | -2.575602 | -1.143525 |
| H | -5.711607 | 0.542621  | -2.025464 |
| H | -6.607583 | -0.989145 | -1.834596 |
| H | -5.344373 | -0.841450 | -3.080906 |
| H | -3.670920 | -2.978826 | -0.527506 |
| H | -4.325350 | -2.905726 | -2.180502 |
| H | -5.429030 | -3.012636 | -0.787647 |
| H | -2.941594 | -1.493551 | 1.134970  |
| H | -4.493267 | -2.235668 | 1.613976  |
| H | -3.966970 | -0.710864 | 2.364266  |
| H | -6.723071 | -1.086563 | 0.790856  |

|    |           |           |           |
|----|-----------|-----------|-----------|
| H  | -6.607810 | 0.562881  | 0.114798  |
| H  | -6.131349 | 0.255808  | 1.798994  |
| C  | 1.879495  | 1.729324  | -1.285394 |
| C  | 2.958604  | 2.575259  | -1.053044 |
| C  | 0.554588  | 2.168654  | -1.096693 |
| C  | 2.751781  | 3.893525  | -0.638825 |
| C  | 0.362953  | 3.500251  | -0.693772 |
| C  | 1.447378  | 4.351629  | -0.468337 |
| C  | -0.580899 | 1.214620  | -1.315735 |
| C  | -1.997844 | 1.742327  | -1.107501 |
| H  | 1.264548  | 5.383598  | -0.157338 |
| H  | -0.646375 | 3.893193  | -0.559405 |
| H  | 3.600364  | 4.555330  | -0.449781 |
| H  | 3.971647  | 2.186248  | -1.173971 |
| H  | 2.079381  | 0.692401  | -1.575388 |
| Cu | -0.342507 | -0.251955 | 0.040840  |
| H  | -2.315360 | 2.320040  | -1.998825 |
| H  | -2.037795 | 2.445852  | -0.264854 |
| H  | -0.484117 | 0.771805  | -2.312702 |
| H  | 6.427220  | 0.744257  | -1.209394 |
| H  | 5.201996  | 0.041381  | -2.313445 |
| H  | 6.359572  | -1.023163 | -1.468636 |
| C  | 5.375543  | -2.982598 | 0.943882  |
| H  | 5.872800  | -3.954972 | 0.811135  |
| H  | 4.732146  | -3.030648 | 1.838565  |
| H  | 6.151206  | -2.216020 | 1.121465  |
| H  | 2.234019  | 0.629095  | 2.009282  |
| H  | 1.685658  | 2.277588  | 1.580455  |
| H  | 1.682509  | 1.777342  | 3.305011  |
| C  | 1.527254  | 1.435917  | 2.270126  |
| H  | 0.340545  | -1.085301 | 3.502646  |
| P  | -0.158202 | 0.791301  | 2.059317  |
| H  | -0.321567 | 0.289888  | 4.439344  |
| C  | -0.415662 | -0.287610 | 3.507068  |
| H  | -1.057711 | 3.003603  | 1.656490  |
| H  | -1.143626 | 2.571521  | 3.389536  |
| C  | -1.279897 | 2.193682  | 2.364784  |
| H  | -1.415563 | -0.743073 | 3.464061  |
| H  | -2.322483 | 1.873102  | 2.223434  |

72

Figure 3\_para-H\_pi-allyl\_02 / electronic energy: -3660.31700817 a.u. / lowest freq: 17.23 cm<sup>-1</sup>

|    |           |           |           |
|----|-----------|-----------|-----------|
| C  | -1.384643 | -0.458336 | -2.244618 |
| C  | -0.972902 | -1.799940 | -2.043945 |
| C  | 0.166102  | -2.059680 | -1.296819 |
| O  | 3.093783  | -2.792692 | -0.137705 |
| P  | 3.671925  | -1.473658 | -0.563565 |
| O  | 2.858492  | -0.446593 | -1.308608 |
| O  | 4.303903  | -0.788830 | 0.800014  |
| O  | 5.031074  | -1.707143 | -1.460068 |
| C  | 4.972930  | 0.441343  | 0.687246  |
| H  | -2.356646 | -0.256728 | -2.698868 |
| H  | -0.630887 | 0.335792  | -2.312069 |
| H  | -1.699724 | -2.601525 | -2.220999 |
| H  | 0.997922  | -1.335232 | -1.248955 |
| H  | 0.399926  | -3.075124 | -0.969182 |
| B  | -1.150909 | 2.626541  | -0.348907 |
| O  | -0.002257 | 2.195445  | -0.956108 |
| O  | -0.922291 | 3.627869  | 0.551314  |
| C  | 1.108876  | 2.736064  | -0.207095 |
| C  | 0.464907  | 4.017507  | 0.428985  |
| C  | 2.273629  | 2.977231  | -1.150413 |
| C  | 1.488958  | 1.682600  | 0.828150  |
| C  | 0.512991  | 5.229199  | -0.497920 |
| C  | 0.999003  | 4.381682  | 1.803887  |
| H  | 0.154861  | 4.978169  | -1.507485 |
| H  | 1.533287  | 5.630331  | -0.582051 |
| H  | -0.135596 | 6.020112  | -0.093451 |
| H  | 0.813085  | 3.584499  | 2.535724  |
| H  | 0.507852  | 5.296876  | 2.166468  |
| H  | 2.082009  | 4.571411  | 1.758894  |
| H  | 0.643743  | 1.465650  | 1.499927  |
| H  | 2.341054  | 2.006143  | 1.443561  |
| H  | 1.785428  | 0.768426  | 0.292545  |
| H  | 3.099085  | 3.479169  | -0.622398 |
| H  | 1.982915  | 3.596541  | -2.009872 |
| H  | 2.634240  | 2.003096  | -1.515309 |
| C  | -4.341920 | -1.172810 | 0.682222  |
| C  | -5.482028 | -1.937338 | 0.449479  |
| C  | -3.935025 | -0.165348 | -0.213844 |
| C  | -6.258122 | -1.714753 | -0.689927 |
| C  | -4.737283 | 0.052054  | -1.347109 |
| C  | -5.879647 | -0.712317 | -1.582197 |
| C  | -2.686826 | 0.611017  | 0.049860  |
| C  | -2.550069 | 1.971302  | -0.631268 |
| H  | -6.482340 | -0.516359 | -2.472768 |
| H  | -4.470967 | 0.836893  | -2.057829 |
| H  | -7.154630 | -2.310777 | -0.875208 |
| H  | -5.771488 | -2.709094 | 1.167198  |
| H  | -3.749422 | -1.352164 | 1.583518  |
| Cu | -1.211131 | -0.729293 | -0.249316 |
| H  | -3.360308 | 2.637929  | -0.283659 |
| H  | -2.662468 | 1.883802  | -1.723729 |
| H  | -2.565133 | 0.733465  | 1.136289  |
| H  | 5.095618  | 0.864887  | 1.695915  |
| H  | 4.409154  | 1.158460  | 0.068157  |
| H  | 5.975933  | 0.319988  | 0.239659  |
| C  | 5.964401  | -2.665905 | -1.028416 |

|   |           |           |           |
|---|-----------|-----------|-----------|
| H | 6.767978  | -2.721408 | -1.777853 |
| H | 5.503522  | -3.662422 | -0.923764 |
| H | 6.413327  | -2.394367 | -0.055922 |
| H | -0.847975 | 0.601727  | 3.110208  |
| H | -2.320213 | -0.409272 | 3.165181  |
| H | -0.896388 | -0.849847 | 4.157491  |
| C | -1.221019 | -0.430043 | 3.193418  |
| H | 1.690751  | -0.621712 | 2.161716  |
| P | -0.567551 | -1.436236 | 1.821315  |
| H | 1.332907  | -2.052972 | 3.172230  |
| C | 1.204093  | -1.605302 | 2.174501  |
| H | -2.329820 | -3.110388 | 1.953772  |
| H | -1.025917 | -3.433167 | 3.143083  |
| C | -1.242288 | -3.104857 | 2.115123  |
| H | 1.702755  | -2.231182 | 1.414857  |
| H | -0.782012 | -3.809116 | 1.406914  |

56

Figure 3 L-Cu-OtBu dimer / electronic energy: -4668.27269506 a.u. / lowest freq: 20.28 cm<sup>-1</sup>

|    |           |           |           |
|----|-----------|-----------|-----------|
| H  | 1.454781  | 3.185323  | 2.121955  |
| H  | -1.091667 | 3.295320  | 2.232897  |
| H  | 1.480610  | 4.376760  | 0.788877  |
| C  | 1.390257  | 3.304563  | 1.028715  |
| H  | 2.248895  | 2.774926  | 0.584062  |
| H  | -1.141168 | 4.483981  | 0.897486  |
| C  | -1.116435 | 3.408141  | 1.137329  |
| C  | 0.084478  | 2.685555  | 0.510787  |
| O  | 0.044189  | 1.344738  | 0.873648  |
| H  | -2.049560 | 2.947919  | 0.774353  |
| H  | 0.052315  | 3.874754  | -1.357879 |
| C  | 0.025055  | 2.825701  | -1.018825 |
| H  | 0.875658  | 2.290877  | -1.472279 |
| H  | -0.901160 | 2.361194  | -1.396152 |
| H  | 2.958274  | 1.006115  | -2.657041 |
| H  | 3.299551  | -1.873435 | -2.121429 |
| C  | 3.677359  | 1.175331  | -1.841405 |
| C  | 3.978968  | -1.600940 | -1.299765 |
| H  | 4.699652  | 1.104301  | -2.245503 |
| H  | 3.518839  | 2.190392  | -1.447525 |
| H  | 4.999010  | -1.491753 | -1.701120 |
| H  | 3.968610  | -2.417548 | -0.562485 |
| P  | 3.392482  | -0.052886 | -0.509011 |
| C  | 4.751395  | 0.319901  | 0.663359  |
| H  | 5.728245  | 0.345249  | 0.155766  |
| H  | 4.568915  | 1.292893  | 1.143584  |
| H  | 4.770992  | -0.448839 | 1.450266  |
| Cu | 1.387359  | -0.047785 | 0.355891  |
| H  | 1.052783  | -3.300511 | 2.261431  |
| H  | 2.049259  | -2.926990 | 0.836004  |
| O  | -0.048207 | -1.342931 | 0.876207  |
| C  | 1.110810  | -3.401807 | 1.166003  |
| H  | 1.154224  | -4.474801 | 0.916365  |
| C  | -0.077761 | -2.683448 | 0.511400  |
| H  | -1.486976 | -3.182509 | 2.088692  |
| H  | 0.959296  | -2.370999 | -1.370977 |
| C  | -1.393184 | -3.307099 | 0.998157  |
| C  | 0.017837  | -2.822386 | -1.016552 |
| H  | -2.243357 | -2.784789 | 0.529205  |
| H  | -1.470986 | -4.380974 | 0.761611  |
| H  | -0.814236 | -2.274610 | -1.489485 |
| H  | -0.015593 | -3.870539 | -1.357852 |
| H  | -2.864028 | -0.603368 | -2.784246 |
| H  | -3.433166 | 2.132063  | -1.768599 |
| C  | -3.581006 | -0.953346 | -2.026339 |
| C  | -4.101882 | 1.661026  | -1.032388 |
| H  | -4.600512 | -0.883806 | -2.437656 |
| H  | -3.356876 | -2.007230 | -1.803518 |
| H  | -5.099460 | 1.538334  | -1.483310 |
| H  | -4.181695 | 2.333019  | -0.164790 |
| P  | -3.397860 | 0.051973  | -0.503299 |
| C  | -4.732552 | -0.612373 | 0.562621  |
| H  | -5.709729 | -0.575241 | 0.056317  |
| H  | -4.504550 | -1.654856 | 0.830705  |
| H  | -4.786261 | -0.026266 | 1.492473  |
| Cu | -1.393433 | 0.048543  | 0.362283  |

28

Figure 3 L-Cu-OtBu / electronic energy: -2334.10735270 a.u. / lowest freq: -39.13 cm<sup>-1</sup>

|   |           |           |           |
|---|-----------|-----------|-----------|
| H | -4.105877 | -1.332535 | 0.968255  |
| H | -4.149740 | -1.387400 | -0.808196 |
| O | -1.712519 | -0.853226 | 0.000001  |
| C | -4.074557 | -0.711355 | 0.058637  |
| H | -4.956088 | -0.048773 | 0.060108  |
| C | -2.745372 | 0.062111  | 0.000906  |
| H | -2.638090 | 0.394148  | 2.149194  |
| H | -2.753281 | 0.265927  | -2.166060 |
| C | -2.653965 | 0.994061  | 1.224813  |
| C | -2.718854 | 0.919727  | -1.279501 |
| H | -1.712633 | 1.569392  | 1.184920  |
| H | -3.490501 | 1.710689  | 1.287963  |
| H | -1.776368 | 1.492537  | -1.324725 |
| H | -3.557324 | 1.634317  | -1.340220 |
| H | 2.442116  | 1.017710  | -2.209934 |
| H | 3.078065  | -1.733910 | -1.400494 |
| C | 2.702639  | 1.337847  | -1.190198 |
| C | 3.315084  | -1.349708 | -0.397345 |
| H | 3.784909  | 1.532944  | -1.136890 |
| H | 2.155445  | 2.266931  | -0.971809 |
| H | 4.370113  | -1.036408 | -0.368346 |

|    |          |           |           |
|----|----------|-----------|-----------|
| H  | 3.157970 | -2.162063 | 0.327594  |
| P  | 2.201656 | 0.043634  | 0.000306  |
| C  | 2.853579 | 0.661225  | 1.592861  |
| H  | 3.931571 | 0.875098  | 1.526895  |
| H  | 2.317993 | 1.579995  | 1.874683  |
| H  | 2.679866 | -0.091178 | 2.376412  |
| Cu | 0.062960 | -0.408951 | -0.003275 |

70

Figure 3\_ed / electronic energy: -3155.87460188 a.u. / lowest freq: 11.42 cm-1

|    |           |           |           |
|----|-----------|-----------|-----------|
| H  | -0.953281 | -3.166097 | -0.309839 |
| H  | -2.577969 | -2.483931 | -0.153509 |
| O  | -0.722801 | -0.949157 | 1.165859  |
| C  | -1.784111 | -3.004943 | 0.394843  |
| H  | -2.158222 | -3.987377 | 0.724568  |
| C  | -1.300935 | -2.179344 | 1.589376  |
| H  | 0.648291  | -3.149536 | 1.617528  |
| H  | -3.221244 | -1.298799 | 2.101803  |
| C  | -0.183773 | -2.938745 | 2.311306  |
| C  | -2.439912 | -1.904482 | 2.572798  |
| H  | 0.208864  | -2.337581 | 3.146164  |
| H  | -0.544498 | -3.898139 | 2.713555  |
| H  | -2.060320 | -1.341525 | 3.439455  |
| H  | -2.878571 | -2.846939 | 2.937460  |
| Cu | 1.139839  | -0.920846 | 0.386293  |
| H  | 1.056430  | 4.912258  | 0.610864  |
| H  | 2.420469  | 3.941746  | 2.458899  |
| H  | 0.701370  | 3.458516  | 2.402659  |
| C  | 1.735449  | 3.084044  | 2.391288  |
| H  | 2.707250  | 4.756558  | -0.052951 |
| H  | 1.879972  | 2.458170  | 3.283891  |
| C  | 1.657698  | 4.452166  | -0.184163 |
| H  | 1.306082  | 4.849580  | -1.147882 |
| C  | 1.534322  | 2.938372  | -0.174971 |
| C  | 2.012113  | 2.248287  | 1.144500  |
| O  | 0.145692  | 2.568639  | -0.221946 |
| H  | 4.143931  | 2.596400  | 0.951770  |
| B  | -0.029916 | 1.375300  | 0.444402  |
| H  | 3.702501  | 1.320418  | 2.112925  |
| C  | 3.450475  | 1.762470  | 1.137384  |
| O  | 1.127301  | 1.108628  | 1.201500  |
| H  | 3.251675  | 2.634595  | -1.503243 |
| C  | 2.195444  | 2.340356  | -1.418544 |
| H  | 1.664689  | 2.695001  | -2.313853 |
| H  | 3.609342  | 0.994382  | 0.369926  |
| H  | 2.135444  | 1.240689  | -1.404032 |
| H  | -3.741486 | -1.478482 | -2.045890 |
| H  | -4.291404 | -1.318464 | 0.099435  |
| H  | -2.833922 | -0.708588 | -3.361743 |
| C  | -3.485339 | -0.510025 | -2.496037 |
| O  | -1.630269 | -0.279491 | -1.014975 |
| H  | -5.500527 | -0.242437 | -0.645178 |
| C  | -4.684450 | -0.292834 | 0.091969  |
| H  | -4.409992 | -0.043182 | -2.870615 |
| B  | -1.338180 | 0.190930  | 0.348230  |
| H  | -5.115024 | -0.091914 | 1.085474  |
| C  | -2.753803 | 0.399038  | -1.508504 |
| C  | -3.582938 | 0.736127  | -0.195713 |
| O  | -2.623638 | 0.690654  | 0.835872  |
| H  | -1.601520 | 1.343872  | -3.063483 |
| C  | -2.292899 | 1.655469  | -2.264419 |
| H  | -3.130173 | 2.197298  | -2.730793 |
| H  | -1.740687 | 2.341103  | -1.608781 |
| H  | -4.940611 | 2.237160  | -1.041325 |
| C  | -4.225555 | 2.125176  | -0.210655 |
| H  | -4.773476 | 2.286728  | 0.730889  |
| H  | -3.466517 | 2.914749  | -0.291729 |
| H  | 4.749033  | -1.452497 | -0.129415 |
| C  | 4.256493  | -1.368792 | -1.109548 |
| H  | 4.274484  | -0.314095 | -1.421428 |
| H  | 4.817512  | -1.966521 | -1.844659 |
| H  | 3.139485  | -3.910893 | 0.308949  |
| C  | 2.717087  | -3.740696 | -0.692506 |
| P  | 2.524841  | -1.944693 | -0.980227 |
| H  | 3.382198  | -4.194279 | -1.443776 |
| H  | 1.733374  | -4.230143 | -0.742993 |
| C  | 1.932965  | -1.853706 | -2.708395 |
| H  | 2.575860  | -2.437454 | -3.385113 |
| H  | 1.920774  | -0.803126 | -3.035062 |
| H  | 0.902696  | -2.235271 | -2.761689 |

70

Figure 3\_ts(TB) / electronic energy: -3155.86594930 a.u. / lowest freq: -80.57 cm-1

|    |           |           |           |
|----|-----------|-----------|-----------|
| H  | 3.010276  | -2.382916 | 0.118642  |
| H  | 1.683795  | -3.550734 | 0.289052  |
| O  | 0.986480  | -1.022586 | 1.231429  |
| C  | 2.428017  | -2.966919 | 0.847086  |
| H  | 3.108602  | -3.663642 | 1.360560  |
| C  | 1.764613  | -2.038365 | 1.865178  |
| H  | 3.454412  | -0.689234 | 1.957273  |
| H  | 0.067382  | -3.345104 | 2.249766  |
| C  | 2.833443  | -1.280682 | 2.648443  |
| C  | 0.860433  | -2.829879 | 2.810029  |
| H  | 2.364821  | -0.587587 | 3.363520  |
| H  | 3.486796  | -1.968789 | 3.205755  |
| H  | 0.379103  | -2.153513 | 3.532327  |
| H  | 1.437600  | -3.583696 | 3.368135  |
| Cu | 1.191646  | 0.705211  | -0.156501 |
| H  | -4.427383 | 0.766248  | -0.614487 |



|   |           |           |           |
|---|-----------|-----------|-----------|
| H | -4.518683 | 0.953062  | 1.818726  |
| H | -3.273614 | -0.182983 | 1.196620  |
| C | -3.444824 | 0.713535  | 1.807889  |
| H | -4.940033 | 2.443526  | -0.292598 |
| H | -3.136606 | 0.474696  | 2.836818  |
| C | -4.170605 | 1.821119  | -0.775127 |
| H | -4.205093 | 2.017783  | -1.857471 |
| C | -2.789480 | 2.154856  | -0.232080 |
| C | -2.601465 | 1.882699  | 1.299916  |
| O | -1.819873 | 1.275125  | -0.815333 |
| H | -3.824652 | 3.498708  | 2.084955  |
| B | -0.832690 | 0.986003  | 0.123485  |
| H | -2.656331 | 2.821205  | 3.244537  |
| C | -2.803566 | 3.100143  | 2.190308  |
| O | -1.228345 | 1.472481  | 1.363096  |
| H | -3.133588 | 4.320679  | -0.285336 |
| C | -2.402291 | 3.578362  | -0.637798 |
| H | -2.355518 | 3.636570  | -1.735582 |
| H | -2.091022 | 3.901305  | 1.952964  |
| H | -1.410567 | 3.846106  | -0.243686 |
| H | 0.204209  | -4.250825 | -1.796312 |
| H | -0.675749 | -4.205721 | 0.241701  |
| H | 0.503640  | -3.256638 | -3.237470 |
| C | -0.244142 | -3.509492 | -2.470797 |
| O | 0.458693  | -1.748160 | -1.013589 |
| H | -2.092610 | -4.638531 | -0.753443 |
| C | -1.697902 | -3.906637 | -0.032981 |
| H | -1.103862 | -3.973045 | -2.978655 |
| B | 0.018530  | -1.182613 | 0.206285  |
| H | -2.317693 | -3.950556 | 0.875196  |
| C | -0.662553 | -2.241330 | -1.733040 |
| C | -1.728672 | -2.480221 | -0.585246 |
| O | -1.295504 | -1.617289 | 0.465873  |
| H | -0.223704 | -0.958441 | -3.401261 |
| C | -1.089544 | -1.191204 | -2.761739 |
| H | -1.896569 | -1.564732 | -3.410033 |
| H | -1.420470 | -0.261620 | -2.282477 |
| H | -3.480699 | -2.692998 | -1.858133 |
| C | -3.151903 | -2.111553 | -0.982870 |
| H | -3.844242 | -2.329239 | -0.155058 |
| H | -3.222981 | -1.042608 | -1.218567 |
| H | 3.073834  | 3.432394  | 1.120755  |
| C | 3.095595  | 3.493894  | 0.022203  |
| H | 2.193451  | 4.031342  | -0.305906 |
| H | 3.990738  | 4.052076  | -0.293219 |
| H | 4.736915  | 1.037154  | 0.921073  |
| C | 4.694130  | 1.124469  | -0.174737 |
| P | 3.070384  | 1.803289  | -0.674895 |
| H | 5.518167  | 1.770887  | -0.515219 |
| H | 4.823307  | 0.120668  | -0.606383 |
| C | 3.271177  | 2.077403  | -2.471443 |
| H | 4.160947  | 2.686342  | -2.694837 |
| H | 2.375105  | 2.582414  | -2.861624 |
| H | 3.361485  | 1.104827  | -2.978490 |

70

Figure 3\_prod / electronic energy: -3155.88950452 a.u. / lowest freq: 21.62 cm<sup>-1</sup>

|    |           |           |           |
|----|-----------|-----------|-----------|
| H  | -1.158855 | -0.853872 | 2.044678  |
| H  | -2.081368 | 0.534440  | 1.412845  |
| O  | 0.476218  | 1.273606  | 2.005172  |
| C  | -1.632766 | 0.101521  | 2.318332  |
| H  | -2.432894 | -0.100666 | 3.046635  |
| C  | -0.605099 | 1.058362  | 2.919658  |
| H  | 0.524730  | -0.514821 | 3.893677  |
| H  | -1.708831 | 2.852240  | 2.370142  |
| C  | 0.037748  | 0.436514  | 4.155433  |
| C  | -1.246887 | 2.403039  | 3.261372  |
| H  | 0.800788  | 1.111086  | 4.572434  |
| H  | -0.716472 | 0.240474  | 4.932049  |
| H  | -0.490899 | 3.101512  | 3.652262  |
| H  | -2.026382 | 2.277814  | 4.028140  |
| Cu | -1.162098 | -1.530549 | -0.469595 |
| H  | 3.580583  | 0.620775  | -0.295027 |
| H  | 4.155902  | -0.696748 | 1.828001  |
| H  | 2.467465  | -0.158497 | 1.567577  |
| C  | 3.113119  | -1.032974 | 1.727857  |
| H  | 5.013044  | -0.445128 | -0.480147 |
| H  | 2.813949  | -1.499307 | 2.678963  |
| C  | 4.011688  | -0.207170 | -0.872112 |
| H  | 4.132527  | 0.132623  | -1.911993 |
| C  | 3.106855  | -1.430692 | -0.824697 |
| C  | 2.945747  | -2.057257 | 0.604145  |
| O  | 1.763095  | -1.042039 | -1.140811 |
| H  | 4.896752  | -2.999208 | 0.793143  |
| B  | 0.857046  | -1.733858 | -0.337362 |
| H  | 3.652152  | -3.642033 | 1.890565  |
| C  | 3.831372  | -3.266557 | 0.871685  |
| O  | 1.571398  | -2.467038 | 0.608300  |
| H  | 4.595766  | -2.740742 | -1.760293 |
| C  | 3.543447  | -2.443828 | -1.883977 |
| H  | 3.430968  | -1.987531 | -2.879035 |
| H  | 3.625644  | -4.087120 | 0.171499  |
| H  | 2.917986  | -3.348697 | -1.857648 |
| H  | -1.188959 | 4.543120  | -0.961219 |
| H  | 0.838043  | 4.659257  | 0.115279  |
| H  | -2.279828 | 3.395564  | -1.769932 |
| C  | -1.230561 | 3.715188  | -1.680966 |
| O  | -0.748295 | 2.177348  | 0.104616  |

|   |           |           |           |
|---|-----------|-----------|-----------|
| H | 1.217478  | 4.989554  | -1.597762 |
| C | 1.435817  | 4.327569  | -0.747385 |
| H | -0.904775 | 4.086148  | -2.664441 |
| B | 0.397248  | 1.808796  | 0.768095  |
| H | 2.497981  | 4.443808  | -0.486318 |
| C | -0.374050 | 2.539678  | -1.237950 |
| C | 1.163803  | 2.862937  | -1.086359 |
| O | 1.537557  | 2.088052  | 0.061507  |
| H | -1.693283 | 1.038056  | -2.022193 |
| C | -0.638926 | 1.330245  | -2.128884 |
| H | -0.452594 | 1.559433  | -3.188203 |
| H | -0.013144 | 0.474822  | -1.835748 |
| H | 1.667555  | 2.926311  | -3.195542 |
| C | 2.005995  | 2.427305  | -2.274763 |
| H | 3.058190  | 2.701403  | -2.107369 |
| H | 1.953583  | 1.339765  | -2.409554 |
| H | -3.849992 | -3.526552 | -1.811768 |
| C | -4.138767 | -2.476486 | -1.968429 |
| H | -3.730136 | -2.151784 | -2.937054 |
| H | -5.237257 | -2.405102 | -1.996484 |
| H | -3.969700 | -3.065287 | 1.097540  |
| C | -4.312146 | -2.048283 | 0.854783  |
| P | -3.430509 | -1.445333 | -0.632444 |
| H | -5.401729 | -2.061155 | 0.696600  |
| H | -4.080638 | -1.396766 | 1.709930  |
| C | -4.218331 | 0.182703  | -0.927440 |
| H | -5.316094 | 0.104994  | -0.887227 |
| H | -3.927434 | 0.563017  | -1.917896 |
| H | -3.880941 | 0.905727  | -0.169933 |

35

Figure 3\_L-Cu-Bpin / electronic energy: -2512.09747879 a.u. / lowest freq: 23.70 cm-1

|    |           |           |           |
|----|-----------|-----------|-----------|
| H  | -3.966569 | -2.370555 | -0.091079 |
| H  | -3.807068 | -0.481958 | -2.357598 |
| C  | -4.300635 | -1.524404 | 0.527882  |
| C  | -4.141575 | 0.306361  | -1.666690 |
| H  | -5.393074 | -1.419924 | 0.438009  |
| H  | -4.044913 | -1.745522 | 1.575060  |
| H  | -5.242483 | 0.322371  | -1.642579 |
| H  | -3.774702 | 1.270837  | -2.048864 |
| P  | -3.438874 | 0.000252  | -0.004071 |
| C  | -4.231120 | 1.295459  | 1.018181  |
| H  | -5.326265 | 1.285342  | 0.903062  |
| H  | -3.978324 | 1.134755  | 2.076846  |
| H  | -3.846004 | 2.282421  | 0.721008  |
| H  | 3.908707  | -2.418790 | -1.177398 |
| H  | 3.178529  | -2.542187 | 1.157081  |
| C  | 3.960241  | -1.319391 | -1.165315 |
| H  | 3.658664  | -0.959332 | -2.157930 |
| H  | 5.009094  | -1.032819 | -0.991557 |
| C  | 3.381449  | -1.465540 | 1.257698  |
| O  | 1.691138  | -1.070941 | -0.382227 |
| H  | 4.437392  | -1.340205 | 1.540068  |
| C  | 3.058289  | -0.772965 | -0.067653 |
| H  | 2.751180  | -1.078631 | 2.072035  |
| B  | 0.869426  | -0.027376 | 0.045169  |
| H  | 2.597061  | 1.082407  | -2.068948 |
| C  | 3.034990  | 0.788202  | 0.049573  |
| H  | 4.301435  | 1.400842  | -1.634829 |
| O  | 1.677868  | 1.040108  | 0.438088  |
| C  | 3.260011  | 1.490169  | -1.291420 |
| H  | 5.023511  | 1.114048  | 0.867358  |
| H  | 3.740760  | 0.997181  | 2.103774  |
| C  | 3.976365  | 1.366007  | 1.096660  |
| H  | 3.026918  | 2.559483  | -1.177997 |
| H  | 3.888770  | 2.463056  | 1.112142  |
| Cu | -1.167130 | -0.038843 | 0.055765  |

57

Figure 3\_para-CO2Me\_pcl / electronic energy: -3049.09919044 a.u. / lowest freq: 22.13 cm-1

|   |           |           |           |
|---|-----------|-----------|-----------|
| H | 1.435319  | 1.421360  | 2.809595  |
| H | -1.178778 | 0.212172  | 2.245164  |
| C | 1.099762  | 2.366926  | 2.357969  |
| C | -1.481218 | 1.208365  | 1.889386  |
| H | 0.650685  | 3.002131  | 3.137322  |
| H | 1.981934  | 2.872876  | 1.937825  |
| H | -1.806136 | 1.815463  | 2.748713  |
| H | -2.325623 | 1.085134  | 1.195517  |
| P | -0.080615 | 1.993325  | 1.013172  |
| C | -0.737438 | 3.638199  | 0.556932  |
| H | -1.133684 | 4.175227  | 1.432567  |
| H | 0.065076  | 4.236474  | 0.099670  |
| H | -1.541130 | 3.516207  | -0.184609 |
| H | -3.214769 | -2.352863 | 0.025529  |
| C | -4.285678 | -0.524565 | -0.396961 |
| C | -3.161054 | -1.360741 | -0.424849 |
| H | -5.072016 | 1.399940  | -0.960799 |
| C | -4.196578 | 0.747549  | -0.977001 |
| H | 4.060058  | -3.789977 | 0.868466  |
| C | -1.979037 | -0.935643 | -1.016043 |
| H | 3.524869  | -2.154336 | 2.619487  |
| H | -1.115815 | -1.605206 | -1.012783 |
| C | -3.013616 | 1.173666  | -1.563401 |
| C | -1.874768 | 0.345329  | -1.595692 |
| C | 4.611692  | -3.053894 | 0.264414  |
| C | 4.219638  | -1.449550 | 2.138870  |
| H | 4.426330  | -3.280454 | -0.793838 |
| O | 2.788231  | -1.476162 | 0.226202  |
| H | -2.960199 | 2.169792  | -2.010384 |

|    |           |           |           |
|----|-----------|-----------|-----------|
| H  | 5.227898  | -1.636003 | 2.537763  |
| H  | 5.685668  | -3.185258 | 0.468280  |
| C  | 4.157595  | -1.646485 | 0.623339  |
| C  | -0.625615 | 0.850596  | -2.182545 |
| B  | 2.590820  | -0.170866 | -0.210132 |
| H  | 0.413925  | -1.034331 | -2.523501 |
| C  | 0.467910  | 0.058314  | -2.539613 |
| C  | 4.873414  | -0.501869 | -0.170990 |
| H  | 4.452475  | -1.397583 | -2.116749 |
| O  | 3.823599  | 0.467313  | -0.311069 |
| H  | 6.136912  | -1.626780 | -1.567881 |
| H  | 6.838739  | -0.608766 | 0.749973  |
| C  | 5.289517  | -0.925367 | -1.580989 |
| H  | 1.233796  | 0.473449  | -3.200847 |
| C  | 6.053889  | 0.136073  | 0.546226  |
| H  | 5.591897  | -0.032209 | -2.147850 |
| H  | 6.491421  | 0.923909  | -0.085414 |
| Cu | 0.807570  | 0.713731  | -0.648612 |
| H  | -0.659049 | 1.886162  | -2.537997 |
| H  | 3.915424  | -0.430347 | 2.420396  |
| H  | 5.752452  | 0.595889  | 1.496599  |
| O  | -6.571709 | -0.253324 | 0.239839  |
| H  | -7.522643 | -2.702962 | 0.623374  |
| C  | -5.573686 | -0.935596 | 0.222935  |
| H  | -7.030021 | -2.001516 | 2.194715  |
| C  | -6.709841 | -2.644400 | 1.361810  |
| O  | -5.517880 | -2.153482 | 0.766889  |
| H  | -6.476677 | -3.647539 | 1.736859  |

57

Figure 3\_para-CO2Me\_ts(CuBadd) / electronic energy: -3049.09101988 a.u. / lowest freq: -166.47 cm-1

|    |           |           |           |
|----|-----------|-----------|-----------|
| H  | 0.993034  | 1.763959  | 2.875192  |
| H  | -1.663765 | 1.036261  | 1.850063  |
| C  | 0.879846  | 2.747227  | 2.394686  |
| C  | -1.722485 | 2.033716  | 1.390643  |
| H  | 0.374431  | 3.437716  | 3.087315  |
| H  | 1.884459  | 3.132161  | 2.164295  |
| H  | -2.138179 | 2.746486  | 2.119649  |
| H  | -2.390939 | 1.971854  | 0.518414  |
| P  | -0.057613 | 2.544647  | 0.841389  |
| C  | -0.292064 | 4.253500  | 0.242091  |
| H  | -0.758331 | 4.887353  | 1.011790  |
| H  | 0.682111  | 4.681648  | -0.037234 |
| H  | -0.930433 | 4.238424  | -0.653742 |
| H  | -2.692339 | -2.162761 | 0.680002  |
| C  | -3.910851 | -0.802126 | -0.473207 |
| C  | -2.697810 | -1.408494 | -0.109258 |
| H  | -4.825138 | 0.627176  | -1.806013 |
| C  | -3.885659 | 0.157868  | -1.504370 |
| H  | 3.018506  | -3.518662 | 1.798303  |
| C  | -1.507008 | -1.062323 | -0.727442 |
| H  | 2.951263  | -1.355925 | 2.952124  |
| H  | -0.585311 | -1.549491 | -0.399322 |
| C  | -2.704694 | 0.508964  | -2.125667 |
| C  | -1.457462 | -0.068081 | -1.747695 |
| C  | 3.670934  | -3.143738 | 0.995642  |
| C  | 3.750620  | -1.003627 | 2.283607  |
| H  | 3.368339  | -3.632407 | 0.060305  |
| O  | 2.234506  | -1.281009 | 0.456340  |
| H  | -2.715532 | 1.264068  | -2.916798 |
| H  | 4.716837  | -1.285217 | 2.726720  |
| H  | 4.704123  | -3.441881 | 1.230390  |
| C  | 3.557746  | -1.630640 | 0.903161  |
| C  | -0.226363 | 0.379250  | -2.337802 |
| B  | 2.330991  | -0.151656 | -0.330718 |
| H  | 1.058417  | -1.322465 | -1.834000 |
| C  | 1.061576  | -0.247705 | -2.059515 |
| C  | 4.458917  | -0.970772 | -0.199090 |
| H  | 3.714210  | -2.272909 | -1.789826 |
| O  | 3.642942  | 0.138934  | -0.628582 |
| H  | 5.336761  | -2.711871 | -1.190248 |
| H  | 6.400321  | -1.263797 | 0.718751  |
| C  | 4.667550  | -1.869190 | -1.416975 |
| H  | 1.858379  | 0.011142  | -2.766007 |
| C  | 5.794848  | -0.445843 | 0.299671  |
| H  | 5.122076  | -1.277308 | -2.225220 |
| H  | 6.356415  | -0.001618 | -0.535645 |
| Cu | 0.752405  | 1.095281  | -0.636672 |
| H  | -0.289031 | 1.115637  | -3.143941 |
| H  | 3.692821  | 0.094149  | 2.236722  |
| H  | 5.668638  | 0.326227  | 1.070141  |
| O  | -6.257922 | -0.601775 | -0.090453 |
| H  | -7.013748 | -2.839006 | 1.122025  |
| C  | -5.195311 | -1.120720 | 0.176701  |
| H  | -6.707003 | -1.555151 | 2.327650  |
| C  | -6.265721 | -2.421540 | 1.812699  |
| O  | -5.079891 | -2.062497 | 1.126247  |
| H  | -5.978628 | -3.181955 | 2.548691  |

57

Figure 3\_para-CO2Me\_L-Cu-alkyl\_01 / electronic energy: -3049.14412054 a.u. / lowest freq: 25.48 cm-1

|   |           |          |          |
|---|-----------|----------|----------|
| H | 2.426184  | 1.890357 | 2.400102 |
| H | -0.513718 | 1.984924 | 2.212853 |
| C | 2.464442  | 2.837419 | 1.842637 |
| C | -0.396502 | 2.950539 | 1.698365 |
| H | 2.395067  | 3.673705 | 2.555605 |
| H | 3.427306  | 2.896737 | 1.314419 |
| H | -0.335782 | 3.755551 | 2.447094 |
| H | -1.283880 | 3.106340 | 1.066903 |

|    |           |           |           |
|----|-----------|-----------|-----------|
| P  | 1.091582  | 2.894351  | 0.636224  |
| C  | 1.199633  | 4.590420  | -0.035887 |
| H  | 1.187495  | 5.343008  | 0.767396  |
| H  | 2.128993  | 4.696473  | -0.615186 |
| H  | 0.351557  | 4.769127  | -0.713369 |
| H  | -2.991258 | -2.250264 | 0.476888  |
| C  | -3.738984 | -0.387285 | -0.316740 |
| C  | -2.766422 | -1.384027 | -0.148918 |
| H  | -4.174499 | 1.489557  | -1.286637 |
| C  | -3.421830 | 0.711467  | -1.137653 |
| H  | 1.576179  | -3.655582 | 2.239554  |
| C  | -1.527454 | -1.292075 | -0.767406 |
| H  | 0.622509  | -1.417108 | 2.080737  |
| H  | -0.790866 | -2.077211 | -0.592389 |
| C  | -2.189767 | 0.806416  | -1.754190 |
| C  | -1.182467 | -0.187330 | -1.589332 |
| C  | 2.528003  | -3.353999 | 1.777895  |
| C  | 1.602950  | -1.032578 | 1.763808  |
| H  | 2.891617  | -4.194869 | 1.173373  |
| O  | 1.463104  | -2.410626 | -0.172690 |
| H  | -1.971848 | 1.672868  | -2.386546 |
| H  | 2.172663  | -0.757282 | 2.663141  |
| H  | 3.250853  | -3.163055 | 2.585446  |
| C  | 2.319660  | -2.103444 | 0.940467  |
| C  | 0.128969  | -0.029498 | -2.223301 |
| B  | 1.854017  | -1.627237 | -1.231816 |
| H  | 0.338802  | -2.157063 | -2.783562 |
| C  | 0.972605  | -1.298915 | -2.484815 |
| C  | 3.613892  | -1.564829 | 0.221288  |
| H  | 4.133865  | -3.508680 | -0.628502 |
| O  | 3.090751  | -1.070337 | -1.022382 |
| H  | 5.112663  | -3.049043 | 0.792470  |
| H  | 4.598767  | -0.709199 | 1.961842  |
| C  | 4.617175  | -2.666377 | -0.111538 |
| H  | 1.646692  | -1.094905 | -3.332479 |
| C  | 4.303510  | -0.418363 | 0.942487  |
| H  | 5.389432  | -2.258129 | -0.780134 |
| H  | 5.210773  | -0.122750 | 0.394911  |
| Cu | 0.840471  | 1.289146  | -0.894271 |
| H  | 0.022409  | 0.571455  | -3.142136 |
| H  | 1.428172  | -0.125179 | 1.163036  |
| H  | 3.644111  | 0.456593  | 0.999149  |
| O  | -5.943565 | 0.381642  | 0.179433  |
| H  | -7.312317 | -1.762041 | 0.924641  |
| C  | -5.073543 | -0.451681 | 0.311267  |
| H  | -6.727203 | -0.887434 | 2.369997  |
| C  | -6.510084 | -1.713061 | 1.675890  |
| O  | -5.243996 | -1.550656 | 1.061240  |
| H  | -6.465296 | -2.658197 | 2.230205  |

57

Figure 3\_para-CO2Me\_L-Cu-alkyl\_02 / electronic energy: -3049.13832151 a.u. / lowest freq: 19.41 cm-1

|   |           |           |           |
|---|-----------|-----------|-----------|
| O | 2.244377  | 4.342312  | -1.532769 |
| H | 1.950561  | 6.699297  | -0.399134 |
| C | 1.773640  | 4.043598  | -0.457102 |
| H | 3.505733  | 5.999501  | 0.140941  |
| C | 2.443738  | 6.125680  | 0.399602  |
| O | 1.813340  | 4.872091  | 0.596365  |
| H | 2.357970  | 6.665872  | 1.350085  |
| H | -5.182916 | -1.892914 | -2.006704 |
| H | -4.709281 | 0.983610  | -2.145039 |
| C | -5.688604 | -1.738486 | -1.041903 |
| C | -5.228030 | 1.086956  | -1.180457 |
| H | -6.752122 | -1.518413 | -1.222997 |
| H | -5.605779 | -2.667838 | -0.458947 |
| H | -6.308591 | 1.197689  | -1.360612 |
| H | -4.848991 | 1.992306  | -0.683677 |
| P | -4.870003 | -0.373904 | -0.140358 |
| C | -5.946120 | -0.123398 | 1.316291  |
| H | -6.994536 | 0.029379  | 1.017014  |
| H | -5.882561 | -0.999467 | 1.978554  |
| H | -5.598980 | 0.757172  | 1.877062  |
| B | 1.312956  | -2.335175 | -0.097975 |
| O | 2.140559  | -2.296342 | -1.189403 |
| O | 2.014861  | -2.369154 | 1.080412  |
| C | 3.499107  | -2.438465 | -0.736731 |
| C | 3.386642  | -2.052418 | 0.786628  |
| C | 4.389015  | -1.520498 | -1.560308 |
| C | 3.896724  | -3.896519 | -0.960008 |
| C | 3.562426  | -0.555343 | 1.041644  |
| C | 4.292644  | -2.848141 | 1.712706  |
| H | 2.915757  | 0.045207  | 0.384885  |
| H | 4.604975  | -0.237870 | 0.894967  |
| H | 3.278898  | -0.335613 | 2.081447  |
| H | 4.084953  | -3.924991 | 1.663504  |
| H | 4.137929  | -2.521507 | 2.751826  |
| H | 5.350782  | -2.681981 | 1.460195  |
| H | 3.267847  | -4.579660 | -0.369906 |
| H | 4.949597  | -4.074997 | -0.697675 |
| H | 3.761100  | -4.144619 | -2.023075 |
| H | 5.421895  | -1.534348 | -1.180612 |
| H | 4.022453  | -0.485588 | -1.547656 |
| H | 4.406954  | -1.860907 | -2.606543 |
| C | -0.021578 | 1.236180  | 1.361004  |
| C | 0.584984  | 2.455603  | 1.120208  |
| C | -0.149399 | 0.242403  | 0.354949  |
| C | 1.104181  | 2.762320  | -0.151186 |
| C | 0.377645  | 0.574743  | -0.919420 |

|    |           |           |           |
|----|-----------|-----------|-----------|
| C  | 0.986828  | 1.796516  | -1.160994 |
| C  | -0.789976 | -1.047913 | 0.636928  |
| C  | -0.256997 | -2.259634 | -0.166398 |
| H  | 1.393223  | 2.019100  | -2.150536 |
| H  | 0.319308  | -0.153047 | -1.730953 |
| H  | 0.672091  | 3.187362  | 1.925659  |
| H  | -0.407988 | 1.019723  | 2.361687  |
| Cu | -2.712128 | -0.705655 | 0.294110  |
| H  | -0.580810 | -2.245287 | -1.221255 |
| H  | -0.690588 | -3.182494 | 0.256628  |
| H  | -0.708208 | -1.256581 | 1.717361  |

57

Figure 3 para-CO2Me L-Cu-alkyl\_03 / electronic energy: -3049.14208777 a.u. / lowest freq: 14.95 cm-1

|    |           |           |           |
|----|-----------|-----------|-----------|
| H  | -1.946223 | 3.311733  | -1.972582 |
| H  | 1.027524  | 3.267564  | -1.957210 |
| C  | -1.861440 | 3.764052  | -0.973492 |
| C  | 1.005143  | 3.656256  | -0.928106 |
| H  | -1.711135 | 4.849368  | -1.082054 |
| H  | -2.801129 | 3.586382  | -0.430209 |
| H  | 1.003790  | 4.756919  | -0.955568 |
| H  | 1.911352  | 3.305053  | -0.412564 |
| P  | -0.468762 | 3.002120  | -0.065797 |
| C  | -0.464800 | 3.910132  | 1.521867  |
| H  | -0.445538 | 4.998749  | 1.358359  |
| H  | -1.363405 | 3.646793  | 2.099727  |
| H  | 0.418722  | 3.616384  | 2.108201  |
| B  | -2.322275 | -1.738928 | -0.327198 |
| O  | -3.123241 | -1.116386 | -1.254029 |
| O  | -2.977109 | -1.947878 | 0.859809  |
| C  | -4.287533 | -0.628691 | -0.564308 |
| C  | -4.357698 | -1.586072 | 0.680505  |
| C  | -5.490321 | -0.695574 | -1.490569 |
| C  | -3.994445 | 0.823066  | -0.186528 |
| C  | -5.129479 | -2.873660 | 0.397154  |
| C  | -4.872485 | -0.933117 | 1.953696  |
| H  | -4.780836 | -3.353647 | -0.529310 |
| H  | -6.209972 | -2.689536 | 0.310304  |
| H  | -4.966375 | -3.579617 | 1.224703  |
| H  | -4.224990 | -0.106797 | 2.275768  |
| H  | -4.903797 | -1.673813 | 2.766387  |
| H  | -5.891859 | -0.544604 | 1.808046  |
| H  | -3.125252 | 0.891004  | 0.487318  |
| H  | -4.855623 | 1.306558  | 0.296862  |
| H  | -3.753587 | 1.381425  | -1.102687 |
| H  | -6.411330 | -0.427624 | -0.951057 |
| H  | -5.616238 | -1.696531 | -1.923763 |
| H  | -5.363353 | 0.017782  | -2.318507 |
| C  | 2.325838  | -0.712257 | 1.231659  |
| C  | 3.698653  | -0.634401 | 1.092690  |
| C  | 1.479964  | -1.162885 | 0.180217  |
| C  | 4.321705  | -1.008007 | -0.113299 |
| C  | 2.132142  | -1.561322 | -1.013465 |
| C  | 3.509811  | -1.476866 | -1.155155 |
| C  | 0.022326  | -1.162475 | 0.345687  |
| C  | -0.812384 | -2.077314 | -0.564716 |
| H  | 3.983273  | -1.783729 | -2.090975 |
| H  | 1.539457  | -1.936763 | -1.850072 |
| H  | 4.309874  | -0.280604 | 1.925293  |
| H  | 1.866258  | -0.409090 | 2.177613  |
| Cu | -0.376433 | 0.780126  | 0.123614  |
| H  | -0.598284 | -3.150713 | -0.381693 |
| H  | -0.593463 | -1.892062 | -1.629053 |
| H  | -0.231306 | -1.338333 | 1.405923  |
| O  | 6.354271  | -1.235751 | -1.345246 |
| H  | 8.124492  | 0.319268  | -0.181364 |
| C  | 5.782229  | -0.930516 | -0.321859 |
| H  | 8.311881  | -1.338994 | 0.461615  |
| C  | 7.845751  | -0.358161 | 0.639355  |
| O  | 6.438086  | -0.472135 | 0.754508  |
| H  | 8.202514  | 0.050728  | 1.592331  |

57

Figure 3 para-CO2Me ts (BHE) / electronic energy: -3049.09404597 a.u. / lowest freq: -926.85 cm-1

|   |           |           |           |
|---|-----------|-----------|-----------|
| H | 0.561445  | -4.309756 | 1.907086  |
| H | 2.671340  | -2.354903 | 1.231925  |
| C | 0.391807  | -4.449601 | 0.829310  |
| C | 2.454900  | -2.557281 | 0.172620  |
| H | 1.071819  | -5.229607 | 0.453263  |
| H | -0.649194 | -4.773647 | 0.683051  |
| H | 3.050216  | -3.421657 | -0.160004 |
| H | 2.742138  | -1.669489 | -0.411510 |
| P | 0.665387  | -2.864588 | -0.036480 |
| C | 0.503968  | -3.303518 | -1.803328 |
| H | 1.162914  | -4.142252 | -2.075925 |
| H | -0.540182 | -3.576342 | -2.017626 |
| H | 0.759616  | -2.423577 | -2.412449 |
| B | -2.708014 | 0.937387  | 0.304450  |
| O | -3.654760 | 1.474765  | 1.129653  |
| O | -3.232091 | 0.432718  | -0.853479 |
| C | -4.943041 | 1.077068  | 0.615476  |
| C | -4.623306 | 0.810179  | -0.901624 |
| C | -5.949467 | 2.187230  | 0.864854  |
| C | -5.347907 | -0.187972 | 1.370227  |
| C | -4.714021 | 2.069233  | -1.761040 |
| C | -5.424310 | -0.317200 | -1.531140 |
| H | -4.160027 | 2.905457  | -1.309207 |
| H | -5.757299 | 2.382068  | -1.910928 |
| H | -4.271386 | 1.863007  | -2.746469 |

|    |           |           |           |
|----|-----------|-----------|-----------|
| H  | -5.237420 | -1.277311 | -1.032531 |
| H  | -5.149465 | -0.425789 | -2.590818 |
| H  | -6.502096 | -0.100166 | -1.481461 |
| H  | -4.631808 | -1.005444 | 1.196481  |
| H  | -6.350194 | -0.532172 | 1.077484  |
| H  | -5.359226 | 0.026038  | 2.449004  |
| H  | -6.914738 | 1.944529  | 0.395764  |
| H  | -5.599556 | 3.149560  | 0.468830  |
| H  | -6.116999 | 2.305540  | 1.945484  |
| C  | 2.087537  | 1.085282  | -1.324010 |
| C  | 3.456262  | 1.200288  | -1.169063 |
| C  | 1.208203  | 1.005437  | -0.208712 |
| C  | 4.036888  | 1.249799  | 0.112544  |
| C  | 1.812656  | 1.071152  | 1.077550  |
| C  | 3.184691  | 1.186339  | 1.225701  |
| C  | -0.209609 | 0.828847  | -0.406026 |
| C  | -1.188150 | 0.870399  | 0.657991  |
| H  | 3.624666  | 1.228461  | 2.224791  |
| H  | 1.190224  | 1.016186  | 1.973819  |
| H  | 4.098061  | 1.252822  | -2.050596 |
| H  | 1.661743  | 1.042548  | -2.330470 |
| Cu | -0.492559 | -1.047330 | 0.482087  |
| H  | -0.915500 | 1.404234  | 1.576218  |
| H  | -1.519606 | -0.458356 | 1.559168  |
| H  | -0.568128 | 0.783069  | -1.438740 |
| O  | 6.026534  | 1.404619  | 1.420739  |
| H  | 8.027566  | 0.669986  | -0.177933 |
| C  | 5.491989  | 1.366538  | 0.333930  |
| H  | 7.875670  | 2.450966  | -0.132751 |
| C  | 7.597314  | 1.543836  | -0.689621 |
| O  | 6.190174  | 1.426664  | -0.809573 |
| H  | 7.991578  | 1.603985  | -1.711070 |

57

Figure 3\_para-CO2Me\_pc2 / electronic energy: -3049.12196245 a.u. / lowest freq: 28.36 cm-1

|    |           |           |           |
|----|-----------|-----------|-----------|
| H  | -0.171196 | -4.364058 | 1.412220  |
| H  | 2.226929  | -2.581782 | 1.638367  |
| C  | -0.086395 | -4.260804 | 0.320281  |
| C  | 2.229231  | -2.580501 | 0.538142  |
| H  | 0.591812  | -5.035917 | -0.069062 |
| H  | -1.087959 | -4.403802 | -0.112442 |
| H  | 2.779182  | -3.462833 | 0.175977  |
| H  | 2.742702  | -1.670075 | 0.195043  |
| P  | 0.507604  | -2.579950 | -0.078423 |
| C  | 0.717231  | -2.632489 | -1.894349 |
| H  | 1.315189  | -3.503404 | -2.205203 |
| H  | -0.269972 | -2.683223 | -2.377611 |
| H  | 1.221846  | -1.714865 | -2.230398 |
| B  | -2.610699 | 1.050522  | 0.239134  |
| O  | -3.600017 | 1.563172  | 1.031702  |
| O  | -3.093931 | 0.460869  | -0.901502 |
| C  | -4.855290 | 1.063457  | 0.528555  |
| C  | -4.505911 | 0.732229  | -0.971383 |
| C  | -5.924794 | 2.128088  | 0.708340  |
| C  | -5.199831 | -0.178290 | 1.347895  |
| C  | -4.687897 | 1.924980  | -1.908162 |
| C  | -5.218588 | -0.487546 | -1.532907 |
| H  | -4.197115 | 2.827108  | -1.513792 |
| H  | -5.751376 | 2.149518  | -2.074534 |
| H  | -4.230787 | 1.688838  | -2.880333 |
| H  | -4.965714 | -1.398380 | -0.974627 |
| H  | -4.927087 | -0.640779 | -2.582673 |
| H  | -6.309487 | -0.346409 | -1.501778 |
| H  | -4.425351 | -0.953123 | 1.245401  |
| H  | -6.170052 | -0.602493 | 1.052700  |
| H  | -5.254755 | 0.097647  | 2.411223  |
| H  | -6.872902 | 1.802935  | 0.254023  |
| H  | -5.629512 | 3.084256  | 0.256887  |
| H  | -6.103315 | 2.299592  | 1.780078  |
| C  | 2.168412  | 0.842084  | -1.290337 |
| C  | 3.549506  | 0.937969  | -1.165786 |
| C  | 1.331899  | 0.879953  | -0.162833 |
| C  | 4.132356  | 1.074444  | 0.099251  |
| C  | 1.928741  | 1.019828  | 1.102874  |
| C  | 3.307401  | 1.114263  | 1.230587  |
| C  | -0.126723 | 0.728039  | -0.340126 |
| C  | -1.098133 | 1.117695  | 0.576405  |
| H  | 3.765219  | 1.215982  | 2.216314  |
| H  | 1.308004  | 1.033464  | 2.001548  |
| H  | 4.181552  | 0.907895  | -2.054288 |
| H  | 1.722545  | 0.736355  | -2.282644 |
| Cu | -0.788673 | -0.907610 | 0.795458  |
| H  | -0.792396 | 1.596583  | 1.513605  |
| H  | -1.722087 | -1.360603 | 1.996686  |
| H  | -0.442400 | 0.492431  | -1.363528 |
| O  | 6.145961  | 1.263958  | 1.369952  |
| H  | 8.114902  | 0.401226  | -0.232049 |
| C  | 5.606959  | 1.175779  | 0.292402  |
| H  | 7.998201  | 2.186671  | -0.280868 |
| C  | 7.693164  | 1.255930  | -0.780616 |
| O  | 6.277840  | 1.160403  | -0.859868 |
| H  | 8.059500  | 1.250693  | -1.813517 |

57

Figure 3\_para-CO2Me\_ts(H&gt;B) / electronic energy: -3049.10879459 a.u. / lowest freq: -424.75 cm-1

|   |           |          |           |
|---|-----------|----------|-----------|
| H | -0.051572 | 4.457596 | -1.588343 |
| H | 2.147325  | 2.438748 | -1.636803 |
| C | -0.001644 | 4.442178 | -0.489319 |
| C | 2.156458  | 2.552059 | -0.542544 |

|    |           |           |           |
|----|-----------|-----------|-----------|
| H  | 0.732425  | 5.188421  | -0.148323 |
| H  | -0.996028 | 4.702771  | -0.097469 |
| H  | 2.783101  | 3.417246  | -0.275166 |
| H  | 2.595662  | 1.642517  | -0.106217 |
| P  | 0.445019  | 2.760375  | 0.069866  |
| C  | 0.668732  | 2.950004  | 1.874417  |
| H  | 1.379518  | 3.757173  | 2.109421  |
| H  | -0.301205 | 3.171121  | 2.344178  |
| H  | 1.045545  | 2.004821  | 2.293239  |
| B  | -2.588893 | -0.669968 | -0.395839 |
| O  | -3.564522 | -1.231183 | -1.234370 |
| O  | -3.114640 | -0.482559 | 0.899897  |
| C  | -4.827863 | -1.033658 | -0.601020 |
| C  | -4.433686 | -1.025592 | 0.922696  |
| C  | -5.764709 | -2.163289 | -1.005548 |
| C  | -5.406554 | 0.304901  | -1.066311 |
| C  | -4.339794 | -2.435218 | 1.511904  |
| C  | -5.323719 | -0.156838 | 1.800445  |
| H  | -3.722003 | -3.089275 | 0.878401  |
| H  | -5.328930 | -2.900501 | 1.637869  |
| H  | -3.860848 | -2.374093 | 2.500708  |
| H  | -5.281259 | 0.898236  | 1.498723  |
| H  | -4.993164 | -0.221340 | 2.848495  |
| H  | -6.370918 | -0.494113 | 1.754980  |
| H  | -4.766731 | 1.146546  | -0.765230 |
| H  | -6.417746 | 0.471866  | -0.666584 |
| H  | -5.467214 | 0.304480  | -2.165170 |
| H  | -6.713022 | -2.106997 | -0.449012 |
| H  | -5.310921 | -3.147656 | -0.829817 |
| H  | -5.996949 | -2.087206 | -2.078786 |
| C  | 2.215355  | -0.938280 | 1.261607  |
| C  | 3.597005  | -1.019078 | 1.129453  |
| C  | 1.372052  | -0.966224 | 0.138455  |
| C  | 4.175415  | -1.129805 | -0.139831 |
| C  | 1.965845  | -1.077657 | -1.131543 |
| C  | 3.343881  | -1.157501 | -1.267578 |
| C  | -0.084252 | -0.831283 | 0.334456  |
| C  | -1.062613 | -1.018445 | -0.609274 |
| H  | 3.797555  | -1.240451 | -2.257048 |
| H  | 1.342168  | -1.084459 | -2.028041 |
| H  | 4.232936  | -0.996249 | 2.015466  |
| H  | 1.773371  | -0.847980 | 2.257292  |
| Cu | -0.937005 | 1.077099  | -0.493025 |
| H  | -0.758293 | -1.286957 | -1.630944 |
| H  | -2.452547 | 0.935089  | -1.048099 |
| H  | -0.392817 | -0.673048 | 1.376057  |
| O  | 6.183236  | -1.284055 | -1.424099 |
| H  | 8.159385  | -0.454445 | 0.182172  |
| C  | 5.648818  | -1.220158 | -0.342294 |
| H  | 8.043313  | -2.240505 | 0.198665  |
| C  | 7.740830  | -1.319215 | 0.717258  |
| O  | 6.326107  | -1.226063 | 0.806561  |
| H  | 8.113388  | -1.333529 | 1.747856  |

57

Figure 3\_para-CO2Me\_int1 / electronic energy: -3049.10990203 a.u. / lowest freq: 12.40 cm-1

|   |           |           |           |
|---|-----------|-----------|-----------|
| H | 0.059559  | 4.565253  | -1.595214 |
| H | 2.109742  | 2.371868  | -1.737990 |
| C | 0.203874  | 4.569912  | -0.504565 |
| C | 2.199806  | 2.511436  | -0.650655 |
| H | 1.024605  | 5.257717  | -0.248766 |
| H | -0.726702 | 4.925821  | -0.037803 |
| H | 2.906776  | 3.330883  | -0.448175 |
| H | 2.594420  | 1.581224  | -0.214900 |
| P | 0.557063  | 2.871235  | 0.068898  |
| C | 0.926825  | 3.084877  | 1.846210  |
| H | 1.726643  | 3.825149  | 2.002698  |
| H | 0.019962  | 3.412931  | 2.375445  |
| H | 1.241700  | 2.118696  | 2.267978  |
| B | -2.638590 | -0.370031 | -0.360582 |
| O | -3.589888 | -0.902195 | -1.294981 |
| O | -3.199536 | -0.494826 | 0.963626  |
| C | -4.838045 | -0.968861 | -0.628322 |
| C | -4.401205 | -1.239815 | 0.857727  |
| C | -5.677097 | -2.074696 | -1.255808 |
| C | -5.563216 | 0.373522  | -0.781001 |
| C | -4.076241 | -2.718088 | 1.100545  |
| C | -5.392827 | -0.753769 | 1.907478  |
| H | -3.398283 | -3.104134 | 0.324550  |
| H | -4.978482 | -3.348498 | 1.123952  |
| H | -3.566261 | -2.814825 | 2.071090  |
| H | -5.539054 | 0.333390  | 1.849709  |
| H | -5.016872 | -0.987968 | 2.915570  |
| H | -6.370854 | -1.246457 | 1.788942  |
| H | -5.009146 | 1.188338  | -0.291729 |
| H | -6.579392 | 0.343811  | -0.359652 |
| H | -5.644146 | 0.614375  | -1.852033 |
| H | -6.613036 | -2.232133 | -0.697194 |
| H | -5.125468 | -3.023706 | -1.294344 |
| H | -5.942286 | -1.801827 | -2.289201 |
| C | 2.165593  | -0.985264 | 1.261029  |
| C | 3.544076  | -1.099759 | 1.116180  |
| C | 1.311238  | -0.999815 | 0.146581  |
| C | 4.106323  | -1.234985 | -0.157772 |
| C | 1.888713  | -1.144683 | -1.127106 |
| C | 3.262818  | -1.259241 | -1.276580 |
| C | -0.138946 | -0.806410 | 0.352704  |
| C | -1.118972 | -0.847870 | -0.593065 |

|    |           |           |           |
|----|-----------|-----------|-----------|
| H  | 3.704271  | -1.365013 | -2.269407 |
| H  | 1.255376  | -1.151199 | -2.016625 |
| H  | 4.189560  | -1.082163 | 1.995358  |
| H  | 1.735808  | -0.874520 | 2.260053  |
| Cu | -0.967754 | 1.272917  | -0.312479 |
| H  | -0.818158 | -1.052103 | -1.631988 |
| H  | -2.583498 | 1.034436  | -0.622707 |
| H  | -0.434858 | -0.668164 | 1.401682  |
| O  | 6.096239  | -1.432286 | -1.463742 |
| H  | 8.098999  | -0.597083 | 0.114539  |
| C  | 5.576306  | -1.349427 | -0.376263 |
| H  | 7.968624  | -2.382082 | 0.139513  |
| C  | 7.680063  | -1.456395 | 0.658065  |
| O  | 6.267279  | -1.350609 | 0.764051  |
| H  | 8.065072  | -1.469658 | 1.684039  |

57

Figure 3\_para-CO2Me\_ts(Cu>O) / electronic energy: -3049.10330689 a.u. / lowest freq: -56.48 cm<sup>-1</sup>

|    |           |           |           |
|----|-----------|-----------|-----------|
| H  | -1.229580 | 4.830263  | -1.294614 |
| H  | 1.026053  | 3.019048  | -1.824270 |
| C  | -1.052385 | 4.680565  | -0.219261 |
| C  | 1.152800  | 2.905531  | -0.737516 |
| H  | -0.308031 | 5.412240  | 0.130732  |
| H  | -2.001937 | 4.846590  | 0.310730  |
| H  | 1.819372  | 3.698339  | -0.364469 |
| H  | 1.614559  | 1.924295  | -0.548826 |
| P  | -0.483843 | 2.969666  | 0.073819  |
| C  | -0.073346 | 2.954985  | 1.854571  |
| H  | 0.625620  | 3.765881  | 2.111096  |
| H  | -0.995562 | 3.067721  | 2.443456  |
| H  | 0.384282  | 1.988304  | 2.112496  |
| B  | -2.262151 | -0.899613 | -0.799306 |
| O  | -3.225254 | -1.881748 | -1.185078 |
| O  | -2.593278 | -0.500484 | 0.578447  |
| C  | -4.376310 | -1.683445 | -0.378167 |
| C  | -3.757612 | -1.206468 | 0.989336  |
| C  | -5.150473 | -2.992400 | -0.289010 |
| C  | -5.265475 | -0.610433 | -1.019063 |
| C  | -3.295997 | -2.380139 | 1.856934  |
| C  | -4.653449 | -0.281879 | 1.802775  |
| H  | -2.666999 | -3.070062 | 1.275500  |
| H  | -4.140656 | -2.943013 | 2.281987  |
| H  | -2.691062 | -1.991682 | 2.690268  |
| H  | -4.872440 | 0.647183  | 1.258831  |
| H  | -4.152990 | -0.009173 | 2.744725  |
| H  | -5.606178 | -0.772451 | 2.056420  |
| H  | -4.767868 | 0.369515  | -1.043759 |
| H  | -6.223463 | -0.499817 | -0.489658 |
| H  | -5.479358 | -0.903045 | -2.058242 |
| H  | -5.965990 | -2.920549 | 0.447414  |
| H  | -4.493886 | -3.825663 | -0.005110 |
| H  | -5.595782 | -3.232488 | -1.266542 |
| C  | 2.418470  | -0.986242 | 1.081985  |
| C  | 3.807741  | -0.941341 | 1.056710  |
| C  | 1.664811  | -1.038028 | -0.103465 |
| C  | 4.486857  | -0.944365 | -0.166832 |
| C  | 2.361483  | -1.042050 | -1.325729 |
| C  | 3.748197  | -0.996822 | -1.356393 |
| C  | 0.194164  | -1.034430 | -0.015352 |
| C  | -0.697214 | -1.181020 | -1.014671 |
| H  | 4.280382  | -0.993787 | -2.309656 |
| H  | 1.809468  | -1.066774 | -2.267579 |
| H  | 4.369796  | -0.899897 | 1.990650  |
| H  | 1.897066  | -0.977412 | 2.042878  |
| Cu | -1.774924 | 1.293536  | -0.568233 |
| H  | -0.323787 | -1.358548 | -2.033332 |
| H  | -2.488736 | 0.210365  | -1.621012 |
| H  | -0.203300 | -0.863771 | 0.992897  |
| O  | 6.594031  | -0.887503 | -1.292744 |
| H  | 8.329298  | 0.160073  | 0.417261  |
| C  | 5.972912  | -0.879114 | -0.256318 |
| H  | 8.422961  | -1.625197 | 0.511234  |
| C  | 7.974021  | -0.727466 | 0.960864  |
| O  | 6.556010  | -0.802917 | 0.940901  |
| H  | 8.262700  | -0.657391 | 2.015880  |

57

Figure 3\_para-CO2Me\_int2 / electronic energy: -3049.11054654 a.u. / lowest freq: 19.39 cm<sup>-1</sup>

|   |           |           |           |
|---|-----------|-----------|-----------|
| H | -4.297236 | 3.392366  | -2.119303 |
| H | -2.912166 | 4.289964  | 0.331417  |
| C | -5.054227 | 2.928278  | -1.470057 |
| C | -3.708221 | 3.797830  | 0.909685  |
| H | -5.828505 | 3.670768  | -1.222941 |
| H | -5.514788 | 2.095196  | -2.021670 |
| H | -4.543751 | 4.501413  | 1.046754  |
| H | -3.298092 | 3.525625  | 1.893418  |
| P | -4.248137 | 2.284996  | 0.038777  |
| C | -5.656801 | 1.697350  | 1.047325  |
| H | -6.416325 | 2.485401  | 1.168741  |
| H | -6.120943 | 0.825434  | 0.562428  |
| H | -5.294444 | 1.389855  | 2.039448  |
| B | -1.068204 | -0.880424 | -0.869942 |
| O | -1.541764 | -2.174606 | -1.304620 |
| O | -1.549067 | -0.745388 | 0.545343  |
| C | -2.529496 | -2.643405 | -0.411267 |
| C | -2.100375 | -1.995270 | 0.957391  |
| C | -2.510446 | -4.167761 | -0.402265 |
| C | -3.911511 | -2.166489 | -0.880086 |
| C | -0.989166 | -2.783304 | 1.652844  |



|    |           |           |           |
|----|-----------|-----------|-----------|
| C  | -3.244270 | -1.739707 | 1.928233  |
| H  | -0.166701 | -3.004550 | 0.957422  |
| H  | -1.358258 | -3.729611 | 2.075630  |
| H  | -0.584198 | -2.177451 | 2.477191  |
| H  | -3.975297 | -1.033611 | 1.507717  |
| H  | -2.855753 | -1.302483 | 2.860844  |
| H  | -3.765123 | -2.675672 | 2.181778  |
| H  | -4.004615 | -1.067478 | -0.853467 |
| H  | -4.725525 | -2.589199 | -0.272433 |
| H  | -4.058749 | -2.480781 | -1.923950 |
| H  | -3.181976 | -4.570900 | 0.371991  |
| H  | -1.497340 | -4.552979 | -0.226589 |
| H  | -2.849475 | -4.551337 | -1.376764 |
| C  | 3.507503  | 0.177461  | 1.036479  |
| C  | 4.882297  | 0.384694  | 1.027849  |
| C  | 2.797089  | -0.088091 | -0.147056 |
| C  | 5.591139  | 0.336653  | -0.177737 |
| C  | 3.523361  | -0.129155 | -1.351614 |
| C  | 4.895286  | 0.078461  | -1.366338 |
| C  | 1.340232  | -0.309489 | -0.072608 |
| C  | 0.507299  | -0.659371 | -1.066882 |
| H  | 5.448558  | 0.042868  | -2.306957 |
| H  | 3.006520  | -0.324353 | -2.293530 |
| H  | 5.411147  | 0.584367  | 1.960878  |
| H  | 2.964531  | 0.216728  | 1.984663  |
| Cu | -2.661818 | 0.790342  | -0.294269 |
| H  | 0.924609  | -0.799142 | -2.074986 |
| H  | -1.648922 | 0.105383  | -1.562181 |
| H  | 0.910225  | -0.181373 | 0.929021  |
| O  | 7.709417  | 0.524247  | -1.268902 |
| H  | 9.313735  | 1.817409  | 0.389522  |
| C  | 7.064534  | 0.544364  | -0.247023 |
| H  | 9.546201  | 0.057348  | 0.621709  |
| C  | 9.016686  | 0.947023  | 0.992789  |
| O  | 7.610363  | 0.754214  | 0.952351  |
| H  | 9.271407  | 1.119869  | 2.044701  |

57

Figure 3\_para-CO2Me\_ts(C-Brot) / electronic energy: -3049.10479731 a.u. / lowest freq: -95.59 cm<sup>-1</sup>

|    |           |           |           |
|----|-----------|-----------|-----------|
| H  | 4.374967  | -3.690214 | -1.645321 |
| H  | 3.318720  | -4.085761 | 1.083617  |
| C  | 5.172476  | -3.082435 | -1.193005 |
| C  | 4.127667  | -3.439269 | 1.454663  |
| H  | 5.996370  | -3.740728 | -0.876796 |
| H  | 5.541154  | -2.379353 | -1.954736 |
| H  | 5.017492  | -4.054094 | 1.660093  |
| H  | 3.789050  | -2.967187 | 2.388827  |
| P  | 4.491482  | -2.142630 | 0.219081  |
| C  | 5.963074  | -1.305906 | 0.913192  |
| H  | 6.776506  | -2.024415 | 1.099729  |
| H  | 6.317406  | -0.537699 | 0.209715  |
| H  | 5.694519  | -0.813625 | 1.859522  |
| B  | 1.019073  | 0.640288  | -0.798995 |
| O  | 1.227990  | 1.953452  | -1.351206 |
| O  | 1.623386  | 0.712851  | 0.579751  |
| C  | 2.283989  | 2.591186  | -0.663152 |
| C  | 2.134161  | 2.027557  | 0.799729  |
| C  | 2.100483  | 4.101156  | -0.767477 |
| C  | 3.626306  | 2.213332  | -1.306806 |
| C  | 1.100440  | 2.800741  | 1.619009  |
| C  | 3.437681  | 1.933474  | 1.581887  |
| H  | 0.171188  | 2.946120  | 1.050954  |
| H  | 1.476123  | 3.787666  | 1.927878  |
| H  | 0.857789  | 2.226353  | 2.525609  |
| H  | 4.155343  | 1.263642  | 1.086920  |
| H  | 3.243376  | 1.529865  | 2.587562  |
| H  | 3.905290  | 2.923387  | 1.697410  |
| H  | 3.852396  | 1.139246  | -1.206446 |
| H  | 4.465406  | 2.775635  | -0.870995 |
| H  | 3.577764  | 2.438748  | -2.382506 |
| H  | 2.830907  | 4.637072  | -0.141641 |
| H  | 1.088783  | 4.403707  | -0.466649 |
| H  | 2.248703  | 4.421415  | -1.810048 |
| C  | -3.891760 | 1.032046  | 0.484144  |
| C  | -5.230888 | 0.662660  | 0.547443  |
| C  | -2.950480 | 0.263780  | -0.221781 |
| C  | -5.669027 | -0.497817 | -0.099786 |
| C  | -3.407138 | -0.898345 | -0.870242 |
| C  | -4.741839 | -1.272525 | -0.809678 |
| C  | -1.540608 | 0.702384  | -0.244883 |
| C  | -0.505174 | 0.103857  | -0.855023 |
| H  | -5.084813 | -2.178076 | -1.313870 |
| H  | -2.707396 | -1.521538 | -1.430784 |
| H  | -5.940670 | 1.275480  | 1.104634  |
| H  | -3.560045 | 1.939840  | 0.995037  |
| Cu | 2.804332  | -0.805472 | -0.236025 |
| H  | -0.714557 | -0.821485 | -1.411477 |
| H  | 1.725412  | -0.275732 | -1.482440 |
| H  | -1.355615 | 1.624861  | 0.319105  |
| O  | -7.499160 | -1.954503 | -0.589559 |
| H  | -9.355789 | -1.439924 | 1.276456  |
| C  | -7.088243 | -0.950017 | -0.058034 |
| H  | -9.712084 | -0.559944 | -0.239545 |
| C  | -9.240772 | -0.480467 | 0.750945  |
| O  | -7.870814 | -0.124047 | 0.638455  |
| H  | -9.720212 | 0.319063  | 1.327290  |

57

Figure 3\_para-CO2Me\_int3 / electronic energy: -3049.10988776 a.u. / lowest freq: 14.53 cm<sup>-1</sup>

|    |            |           |           |
|----|------------|-----------|-----------|
| H  | 4.813035   | -3.052863 | -2.189324 |
| H  | 4.169529   | -4.062733 | 0.500371  |
| C  | 5.541839   | -2.368943 | -1.729673 |
| C  | 4.934278   | -3.373225 | 0.887605  |
| H  | 6.513370   | -2.879123 | -1.640652 |
| H  | 5.651099   | -1.492996 | -2.386136 |
| H  | 5.918436   | -3.864706 | 0.844458  |
| H  | 4.690490   | -3.141325 | 1.935053  |
| P  | 4.921636   | -1.832951 | -0.095971 |
| C  | 6.323385   | -0.880097 | 0.590613  |
| H  | 7.257560   | -1.462214 | 0.557942  |
| H  | 6.456191   | 0.046646  | 0.012613  |
| H  | 6.105046   | -0.609129 | 1.634242  |
| B  | 0.934928   | 0.377401  | -0.427825 |
| O  | 0.994971   | 1.661195  | -1.082684 |
| O  | 1.741776   | 0.547981  | 0.835702  |
| C  | 1.966674   | 2.479528  | -0.468222 |
| C  | 2.003797   | 1.939625  | 1.009680  |
| C  | 1.533702   | 3.937378  | -0.580205 |
| C  | 3.309853   | 2.305230  | -1.190105 |
| C  | 0.879458   | 2.517869  | 1.870873  |
| C  | 3.341550   | 2.112159  | 1.714913  |
| H  | -0.092063  | 2.428259  | 1.363883  |
| H  | 1.053097   | 3.575545  | 2.118215  |
| H  | 0.823134   | 1.949813  | 2.811556  |
| H  | 4.140898   | 1.560172  | 1.199474  |
| H  | 3.277227   | 1.725933  | 2.743795  |
| H  | 3.626169   | 3.174226  | 1.768200  |
| H  | 3.714668   | 1.285112  | -1.077553 |
| H  | 4.071065   | 3.012578  | -0.828558 |
| H  | 3.157006   | 2.480792  | -2.265196 |
| H  | 2.201733   | 4.597465  | -0.005323 |
| H  | 0.505772   | 4.076955  | -0.219802 |
| H  | 1.565973   | 4.255727  | -1.633438 |
| C  | -4.094329  | 0.931758  | -0.796535 |
| C  | -5.435029  | 0.609695  | -0.617771 |
| C  | -3.068622  | 0.073369  | -0.364507 |
| C  | -5.790684  | -0.592896 | 0.003135  |
| C  | -3.442333  | -1.134630 | 0.253033  |
| C  | -4.778716  | -1.461013 | 0.434504  |
| C  | -1.664176  | 0.479475  | -0.564805 |
| C  | -0.554027  | -0.173754 | -0.184414 |
| H  | -5.057136  | -2.399456 | 0.918015  |
| H  | -2.674976  | -1.830414 | 0.598797  |
| H  | -6.210929  | 1.295568  | -0.960421 |
| H  | -3.828747  | 1.875063  | -1.281116 |
| Cu | 2.993894   | -0.778002 | -0.136294 |
| H  | -0.666420  | -1.139868 | 0.330065  |
| H  | 1.550486   | -0.570115 | -1.134513 |
| H  | -1.535411  | 1.442573  | -1.074958 |
| O  | -7.554688  | -2.020604 | 0.752507  |
| H  | -9.702266  | -0.492772 | 1.012126  |
| C  | -7.209362  | -0.988904 | 0.226099  |
| H  | -9.734523  | -1.281177 | -0.593931 |
| C  | -9.454296  | -0.366111 | -0.051783 |
| O  | -8.074469  | -0.076608 | -0.220394 |
| H  | -10.000122 | 0.490991  | -0.462329 |

42

Figure 3 para-CO2Me-alkenylBpin / electronic energy: -947.261050912 a.u. / lowest freq: 13.61 cm<sup>-1</sup>

|   |           |           |           |
|---|-----------|-----------|-----------|
| B | 2.536731  | -0.351136 | -0.017816 |
| O | 3.507318  | -1.307017 | 0.091467  |
| O | 3.044449  | 0.917279  | -0.089343 |
| C | 4.760349  | -0.629615 | 0.319214  |
| C | 4.471353  | 0.802509  | -0.264709 |
| C | 5.875327  | -1.387204 | -0.382583 |
| C | 4.996326  | -0.622611 | 1.828498  |
| C | 4.745855  | 0.900135  | -1.764214 |
| C | 5.160646  | 1.939871  | 0.470457  |
| H | 4.269808  | 0.075213  | -2.315220 |
| H | 5.823957  | 0.886700  | -1.979228 |
| H | 4.330817  | 1.845090  | -2.144324 |
| H | 4.841247  | 2.001481  | 1.518889  |
| H | 4.920642  | 2.897749  | -0.014329 |
| H | 6.253003  | 1.810310  | 0.441985  |
| H | 4.207048  | -0.068094 | 2.357891  |
| H | 5.967553  | -0.174767 | 2.082696  |
| H | 4.987792  | -1.658529 | 2.197849  |
| H | 6.823693  | -0.833725 | -0.309558 |
| H | 5.649454  | -1.557045 | -1.443307 |
| H | 6.018218  | -2.368010 | 0.094703  |
| C | -2.207218 | 1.219150  | 0.141935  |
| C | -3.592625 | 1.099338  | 0.165560  |
| C | -1.385376 | 0.103371  | -0.083437 |
| C | -4.189417 | -0.146927 | -0.050480 |
| C | -1.997705 | -1.142169 | -0.304573 |
| C | -3.380002 | -1.264785 | -0.289389 |
| C | 0.078353  | 0.284197  | -0.078553 |
| C | 1.016202  | -0.679307 | -0.047860 |
| H | -3.852270 | -2.233203 | -0.464204 |
| H | -1.388084 | -2.026100 | -0.502335 |
| H | -4.214799 | 1.975709  | 0.350685  |
| H | -1.746933 | 2.196518  | 0.307586  |
| H | 0.706356  | -1.730832 | -0.015627 |
| H | 0.406700  | 1.330741  | -0.083277 |
| O | -6.220518 | -1.390859 | -0.242301 |
| H | -8.075832 | 0.017569  | 1.049167  |
| C | -5.670406 | -0.334915 | -0.040108 |

|   |           |          |           |
|---|-----------|----------|-----------|
| H | -8.154100 | 0.388896 | -0.700309 |
| C | -7.745844 | 0.716413 | 0.266859  |
| O | -6.327659 | 0.794119 | 0.220526  |
| H | -8.101542 | 1.727137 | 0.496846  |

57

Figure 3\_para-CO2Me\_pc2\_rev / electronic energy: -3049.11948820 a.u. / lowest freq: 23.81 cm-1

|    |           |           |           |
|----|-----------|-----------|-----------|
| H  | 0.525731  | -4.098132 | -1.127027 |
| H  | -2.133548 | -3.569521 | -2.217176 |
| C  | 0.106754  | -3.962919 | -0.118894 |
| C  | -2.501294 | -3.455270 | -1.186660 |
| H  | -0.287410 | -4.924075 | 0.246390  |
| H  | 0.919260  | -3.629819 | 0.544320  |
| H  | -2.784680 | -4.441679 | -0.788146 |
| H  | -3.389805 | -2.807777 | -1.210333 |
| P  | -1.193631 | -2.677857 | -0.174212 |
| C  | -1.874439 | -2.705835 | 1.522698  |
| H  | -2.286306 | -3.693433 | 1.781824  |
| H  | -1.071454 | -2.455663 | 2.232627  |
| H  | -2.655076 | -1.937903 | 1.617639  |
| B  | -2.086799 | 0.946607  | 0.454982  |
| O  | -3.015879 | 0.549158  | 1.381007  |
| O  | -2.642996 | 1.648814  | -0.581118 |
| C  | -4.321657 | 0.818147  | 0.830839  |
| C  | -4.010131 | 1.938674  | -0.229766 |
| C  | -5.255730 | 1.243912  | 1.951122  |
| C  | -4.817339 | -0.477061 | 0.191685  |
| C  | -4.032306 | 3.345113  | 0.365718  |
| C  | -4.866222 | 1.886699  | -1.484609 |
| H  | -3.426170 | 3.405551  | 1.282014  |
| H  | -5.056587 | 3.666007  | 0.603435  |
| H  | -3.612276 | 4.050977  | -0.365663 |
| H  | -4.743544 | 0.937781  | -2.022523 |
| H  | -4.576095 | 2.700761  | -2.165077 |
| H  | -5.929956 | 2.016317  | -1.234832 |
| H  | -4.147676 | -0.799455 | -0.619435 |
| H  | -5.830358 | -0.362731 | -0.219386 |
| H  | -4.845736 | -1.271729 | 0.951427  |
| H  | -6.234083 | 1.541531  | 1.544872  |
| H  | -4.844610 | 2.082943  | 2.527120  |
| H  | -5.416770 | 0.403993  | 2.642976  |
| C  | 2.652956  | 1.839546  | -0.980996 |
| C  | 4.035313  | 1.751233  | -0.877990 |
| C  | 1.817632  | 1.018498  | -0.207197 |
| C  | 4.621345  | 0.832842  | -0.000030 |
| C  | 2.416611  | 0.101774  | 0.674110  |
| C  | 3.797981  | 0.007692  | 0.776618  |
| C  | 0.349699  | 1.127380  | -0.351099 |
| C  | -0.572861 | 0.625489  | 0.562342  |
| H  | 4.245860  | -0.714739 | 1.460100  |
| H  | 1.793809  | -0.562492 | 1.277049  |
| H  | 4.678736  | 2.392036  | -1.483903 |
| H  | 2.206159  | 2.552859  | -1.677819 |
| Cu | -0.319241 | -0.730500 | -0.992539 |
| H  | -0.212133 | 0.142698  | 1.477524  |
| H  | 0.294599  | -0.914557 | -2.452985 |
| H  | 0.007174  | 1.837453  | -1.110925 |
| O  | 6.852420  | 1.466518  | -0.574995 |
| H  | 8.415247  | 0.605578  | 1.395473  |
| C  | 6.108877  | 0.762807  | 0.066365  |
| O  | 6.540804  | -0.171200 | 0.914868  |
| C  | 7.947214  | -0.323718 | 1.039659  |
| H  | 8.105359  | -1.123093 | 1.772746  |
| H  | 8.399546  | -0.606680 | 0.077996  |

57

Figure 3\_para-CO2Me\_ts(CuHadd\_rev) / electronic energy: -3049.09338527 a.u. / lowest freq: -781.57 cm-1

|   |           |           |           |
|---|-----------|-----------|-----------|
| H | -0.378765 | -4.449445 | -1.451089 |
| H | -2.924169 | -3.220043 | -2.177435 |
| C | -0.680286 | -4.402830 | -0.394333 |
| C | -3.184590 | -3.212375 | -1.108839 |
| H | -1.242851 | -5.312713 | -0.133562 |
| H | 0.232203  | -4.354767 | 0.218620  |
| H | -3.637403 | -4.178644 | -0.838782 |
| H | -3.919749 | -2.412029 | -0.940529 |
| P | -1.680821 | -2.898081 | -0.118697 |
| C | -2.253362 | -3.089253 | 1.606376  |
| H | -2.755447 | -4.056337 | 1.763575  |
| H | -1.389325 | -3.012604 | 2.283220  |
| H | -2.946500 | -2.271034 | 1.849691  |
| B | -1.803858 | 1.216010  | 0.423557  |
| O | -2.666203 | 1.370909  | 1.497654  |
| O | -2.441614 | 1.510670  | -0.776644 |
| C | -3.992444 | 1.492190  | 0.968379  |
| C | -3.725846 | 2.065052  | -0.470462 |
| C | -4.819546 | 2.394799  | 1.869413  |
| C | -4.594599 | 0.087255  | 0.930401  |
| C | -3.586110 | 3.587256  | -0.484810 |
| C | -4.726941 | 1.622272  | -1.526968 |
| H | -2.883832 | 3.931654  | 0.288964  |
| H | -4.552452 | 4.089007  | -0.329321 |
| H | -3.190888 | 3.900019  | -1.462692 |
| H | -4.718248 | 0.532342  | -1.660830 |
| H | -4.476547 | 2.082272  | -2.494645 |
| H | -5.747237 | 1.935468  | -1.257459 |
| H | -4.003940 | -0.567558 | 0.272474  |
| H | -5.635971 | 0.092148  | 0.577744  |
| H | -4.576340 | -0.340199 | 1.943875  |
| H | -5.813622 | 2.574277  | 1.432070  |

|    |           |           |           |
|----|-----------|-----------|-----------|
| H  | -4.328903 | 3.363041  | 2.034659  |
| H  | -4.961891 | 1.916405  | 2.850110  |
| C  | 2.745481  | 1.760647  | -0.955098 |
| C  | 4.121353  | 1.770507  | -0.746626 |
| C  | 1.962324  | 0.695775  | -0.495358 |
| C  | 4.742902  | 0.711745  | -0.077552 |
| C  | 2.591831  | -0.360773 | 0.177353  |
| C  | 3.964914  | -0.358265 | 0.385242  |
| C  | 0.478473  | 0.717334  | -0.683344 |
| C  | -0.356211 | 0.767676  | 0.499919  |
| H  | 4.442146  | -1.192889 | 0.900597  |
| H  | 1.989353  | -1.204339 | 0.526108  |
| H  | 4.731387  | 2.601486  | -1.106217 |
| H  | 2.270005  | 2.593212  | -1.479488 |
| Cu | -0.608855 | -1.006455 | -0.535073 |
| H  | 0.111107  | 0.529016  | 1.462329  |
| H  | 0.437894  | -0.643675 | -1.682520 |
| H  | 0.158025  | 1.353628  | -1.515231 |
| O  | 6.921794  | 1.679260  | -0.248373 |
| H  | 8.444220  | 0.422883  | 1.562573  |
| C  | 6.221585  | 0.760793  | 0.106061  |
| O  | 6.700804  | -0.331430 | 0.703000  |
| C  | 8.105753  | -0.389657 | 0.903268  |
| H  | 8.308174  | -1.358384 | 1.374230  |
| H  | 8.641625  | -0.319976 | -0.054469 |

57

Figure 3 para-CO2Me\_L-Cu-alkyl\_rev / electronic energy: -3049.14832622 a.u. / lowest freq: 12.50 cm-1

|    |           |           |           |
|----|-----------|-----------|-----------|
| H  | -1.736057 | 2.195766  | -1.783283 |
| H  | 1.054623  | 3.167151  | -1.779205 |
| C  | -1.856525 | 2.643400  | -0.785653 |
| C  | 0.841487  | 3.608232  | -0.794120 |
| H  | -2.160993 | 3.695538  | -0.898652 |
| H  | -2.646481 | 2.093993  | -0.252271 |
| H  | 0.395797  | 4.605236  | -0.935151 |
| H  | 1.791280  | 3.712470  | -0.249065 |
| P  | -0.283624 | 2.507410  | 0.138057  |
| C  | -0.615538 | 3.452358  | 1.667388  |
| H  | -0.978265 | 4.467141  | 1.441789  |
| H  | -1.370499 | 2.923359  | 2.267773  |
| H  | 0.307982  | 3.521751  | 2.261213  |
| B  | 2.445886  | -1.144019 | 0.410001  |
| O  | 3.415216  | -0.591429 | 1.252665  |
| O  | 2.955788  | -1.274327 | -0.883487 |
| C  | 4.416675  | -0.006019 | 0.420460  |
| C  | 4.333340  | -0.898353 | -0.869775 |
| C  | 5.758912  | -0.040056 | 1.134625  |
| C  | 4.000461  | 1.443850  | 0.152328  |
| C  | 5.166318  | -2.176412 | -0.758636 |
| C  | 4.668191  | -0.171741 | -2.165050 |
| H  | 4.974422  | -2.697457 | 0.191259  |
| H  | 6.244926  | -1.972879 | -0.833510 |
| H  | 4.887954  | -2.855526 | -1.578331 |
| H  | 3.964492  | 0.648760  | -2.359078 |
| H  | 4.609521  | -0.872202 | -3.011886 |
| H  | 5.689202  | 0.238883  | -2.134209 |
| H  | 3.042173  | 1.481843  | -0.388564 |
| H  | 4.753624  | 1.994603  | -0.429872 |
| H  | 3.863168  | 1.958878  | 1.115182  |
| H  | 6.564682  | 0.308785  | 0.470482  |
| H  | 6.004919  | -1.051462 | 1.484361  |
| H  | 5.734296  | 0.622393  | 2.013286  |
| C  | -2.153216 | -2.535738 | 0.930649  |
| C  | -3.476917 | -2.107093 | 0.955495  |
| C  | -1.269764 | -2.095110 | -0.063349 |
| C  | -3.954065 | -1.227076 | -0.022109 |
| C  | -1.766770 | -1.231733 | -1.052479 |
| C  | -3.087621 | -0.800960 | -1.038130 |
| C  | 0.197008  | -2.454588 | -0.022812 |
| C  | 1.019594  | -1.464916 | 0.811362  |
| H  | -3.453138 | -0.128344 | -1.815249 |
| H  | -1.095206 | -0.888241 | -1.844915 |
| H  | -4.158288 | -2.447257 | 1.738175  |
| H  | -1.791147 | -3.217659 | 1.705056  |
| Cu | 0.427520  | 0.418361  | 0.477322  |
| H  | 0.866245  | -1.596506 | 1.897075  |
| H  | 0.583978  | -2.470296 | -1.054301 |
| H  | 0.295651  | -3.486842 | 0.362170  |
| O  | -6.170170 | -1.168444 | 0.872840  |
| H  | -7.239614 | 1.113929  | 0.091339  |
| C  | -5.370195 | -0.773995 | 0.057662  |
| O  | -5.668735 | 0.138628  | -0.870216 |
| C  | -6.995972 | 0.642972  | -0.872038 |
| H  | -7.038370 | 1.390690  | -1.672307 |
| H  | -7.723250 | -0.157567 | -1.071839 |

78

Figure 3 para-CO2Me\_pc3\_01 / electronic energy: -3887.98535988 a.u. / lowest freq: 10.79 cm-1

|   |           |           |           |
|---|-----------|-----------|-----------|
| C | -0.427545 | -1.696973 | -0.715003 |
| C | -0.193242 | -1.827592 | 0.642400  |
| C | 1.201943  | -1.832333 | 1.204650  |
| O | 1.777747  | -3.154389 | 1.191300  |
| P | 2.363153  | -3.751896 | -0.173317 |
| O | 2.939388  | -2.790908 | -1.136681 |
| O | 3.354615  | -4.834806 | 0.468179  |
| O | 1.184030  | -4.608465 | -0.846262 |
| C | 4.139391  | -5.654041 | -0.393448 |
| H | -1.387082 | -1.986785 | -1.152980 |
| H | 0.405514  | -1.586387 | -1.416442 |

|    |           |           |           |
|----|-----------|-----------|-----------|
| H  | -0.978177 | -2.231199 | 1.293247  |
| H  | 1.860437  | -1.153361 | 0.641084  |
| H  | 1.209636  | -1.532495 | 2.260305  |
| B  | -3.325403 | 1.450205  | -1.064514 |
| O  | -4.038898 | 1.492227  | 0.112095  |
| O  | -3.774524 | 0.461609  | -1.900672 |
| C  | -4.818532 | 0.285728  | 0.190825  |
| C  | -4.955807 | -0.119337 | -1.323187 |
| C  | -6.132914 | 0.578661  | 0.894780  |
| C  | -3.992582 | -0.711384 | 1.002304  |
| C  | -6.158942 | 0.526153  | -2.008358 |
| C  | -4.948540 | -1.617971 | -1.580637 |
| H  | -6.189920 | 1.611225  | -1.829428 |
| H  | -7.105979 | 0.087394  | -1.662635 |
| H  | -6.080888 | 0.364311  | -3.093414 |
| H  | -4.017312 | -2.085679 | -1.234922 |
| H  | -5.043762 | -1.810484 | -2.659468 |
| H  | -5.795210 | -2.104540 | -1.072875 |
| H  | -3.015972 | -0.889284 | 0.524419  |
| H  | -4.507815 | -1.674197 | 1.127207  |
| H  | -3.809483 | -0.289449 | 2.001129  |
| H  | -6.785922 | -0.307239 | 0.884334  |
| H  | -6.667870 | 1.414327  | 0.425156  |
| H  | -5.942525 | 0.845657  | 1.944898  |
| C  | 1.652500  | 1.356138  | -1.596251 |
| C  | 2.918710  | 1.853649  | -1.350680 |
| C  | 0.472278  | 2.071293  | -1.242695 |
| C  | 3.093566  | 3.115332  | -0.750667 |
| C  | 0.676088  | 3.357420  | -0.677688 |
| C  | 1.946715  | 3.857081  | -0.434665 |
| C  | -0.844126 | 1.456179  | -1.397785 |
| C  | -2.085876 | 2.356397  | -1.359025 |
| H  | 2.069536  | 4.847398  | 0.010834  |
| H  | -0.186608 | 3.974736  | -0.420285 |
| H  | 3.793983  | 1.261693  | -1.625477 |
| H  | 1.550643  | 0.372831  | -2.064174 |
| Cu | -0.682340 | 0.132272  | 0.173298  |
| H  | -2.204343 | 2.938955  | -2.294925 |
| H  | -2.021087 | 3.090719  | -0.541345 |
| H  | -0.864845 | 0.789185  | -2.272971 |
| H  | 4.764500  | -6.288560 | 0.246921  |
| H  | 4.785775  | -5.038876 | -1.037594 |
| C  | 3.501554  | -6.294370 | -1.023354 |
| C  | 0.366874  | -5.476348 | -0.073067 |
| H  | -0.215028 | -6.088164 | -0.773904 |
| H  | -0.322786 | -4.898482 | 0.560830  |
| H  | 0.973913  | -6.138686 | 0.563862  |
| H  | 1.780562  | 0.790510  | 2.697931  |
| H  | 1.499833  | 2.351870  | 1.889158  |
| H  | 1.138847  | 2.176820  | 3.637938  |
| C  | 1.117908  | 1.668107  | 2.661730  |
| H  | -0.493720 | -0.762437 | 3.727983  |
| P  | -0.577074 | 1.143910  | 2.217564  |
| H  | -0.970823 | 0.723448  | 4.605832  |
| C  | -1.094608 | 0.157790  | 3.669370  |
| H  | -1.171127 | 3.426313  | 1.684945  |
| H  | -1.510038 | 3.076400  | 3.409668  |
| C  | -1.559788 | 2.673581  | 2.386169  |
| H  | -2.151131 | -0.129369 | 3.564508  |
| H  | -2.605016 | 2.460575  | 2.116459  |
| O  | 4.607720  | 4.768265  | 0.068391  |
| H  | 6.909881  | 3.520985  | 0.509028  |
| C  | 4.420990  | 3.689825  | -0.451835 |
| H  | 6.933096  | 4.302550  | -1.098315 |
| C  | 6.742414  | 3.358669  | -0.566328 |
| O  | 5.430239  | 2.885778  | -0.815367 |
| H  | 7.426674  | 2.584375  | -0.933274 |

78

Figure 3\_para-CO2Me\_pc3\_02 / electronic energy: -3887.98357896 a.u. / lowest freq: 18.65 cm<sup>-1</sup>

|   |           |           |           |
|---|-----------|-----------|-----------|
| C | -0.167061 | -1.111222 | -0.821260 |
| C | -0.002520 | -1.750535 | 0.391213  |
| C | 1.340678  | -1.976739 | 1.020642  |
| O | 1.983991  | -3.148863 | 0.475555  |
| P | 3.201199  | -3.002283 | -0.545371 |
| O | 2.984965  | -2.265778 | -1.807863 |
| O | 4.324184  | -2.361655 | 0.416345  |
| O | 3.619655  | -4.519468 | -0.791190 |
| C | 5.529510  | -1.842824 | -0.135026 |
| H | -1.091786 | -1.233235 | -1.393638 |
| H | 0.693265  | -0.696973 | -1.359873 |
| H | -0.820102 | -2.370159 | 0.778816  |
| H | 1.997946  | -1.105755 | 0.888880  |
| H | 1.240345  | -2.168361 | 2.096065  |
| B | 0.736042  | 2.489464  | -1.417781 |
| O | 1.727913  | 1.779550  | -2.046756 |
| O | 1.249543  | 3.426747  | -0.551819 |
| C | 2.975224  | 2.102064  | -1.408298 |
| C | 2.668353  | 3.514372  | -0.797087 |
| C | 4.090243  | 2.073730  | -2.439556 |
| C | 3.209362  | 1.031821  | -0.344616 |
| C | 2.881142  | 4.652453  | -1.794521 |
| C | 3.399227  | 3.818200  | 0.499602  |
| H | 2.384227  | 4.446900  | -2.754441 |
| H | 3.949366  | 4.829282  | -1.985691 |
| H | 2.448874  | 5.575495  | -1.380873 |
| H | 3.178611  | 3.081027  | 1.280384  |
| H | 3.101319  | 4.809056  | 0.873808  |

|    |           |           |           |
|----|-----------|-----------|-----------|
| H  | 4.486640  | 3.832181  | 0.330597  |
| H  | 2.413897  | 1.061403  | 0.416374  |
| H  | 4.178589  | 1.155800  | 0.159840  |
| H  | 3.188018  | 0.046534  | -0.831464 |
| H  | 5.040882  | 2.401660  | -1.992495 |
| H  | 3.865433  | 2.718474  | -3.299328 |
| H  | 4.222526  | 1.047456  | -2.813089 |
| C  | -3.699168 | 1.153502  | 0.639855  |
| C  | -4.900762 | 0.470891  | 0.612811  |
| C  | -2.813310 | 1.173439  | -0.475895 |
| C  | -5.310964 | -0.231243 | -0.534534 |
| C  | -3.270763 | 0.493404  | -1.637449 |
| C  | -4.474781 | -0.193610 | -1.661433 |
| C  | -1.498361 | 1.798308  | -0.375135 |
| C  | -0.785741 | 2.212688  | -1.664567 |
| H  | -4.779570 | -0.710833 | -2.573345 |
| H  | -2.656892 | 0.499536  | -2.540039 |
| H  | -5.554065 | 0.471231  | 1.488855  |
| H  | -3.415111 | 1.696884  | 1.543927  |
| Cu | -0.610228 | 0.240836  | 0.644505  |
| H  | -1.269514 | 3.094304  | -2.135630 |
| H  | -0.829949 | 1.408004  | -2.415489 |
| H  | -1.506834 | 2.617849  | 0.360807  |
| H  | 5.992202  | -1.207260 | 0.630450  |
| H  | 5.328940  | -1.244968 | -1.036170 |
| H  | 6.222251  | -2.659756 | -0.390741 |
| C  | 3.841875  | -5.432307 | 0.278715  |
| H  | 4.269740  | -6.342396 | -0.159461 |
| H  | 2.895353  | -5.680194 | 0.780638  |
| H  | 4.549545  | -5.019722 | 1.014202  |
| H  | 2.081022  | 1.462217  | 2.658119  |
| H  | 1.013379  | 2.790439  | 2.134275  |
| H  | 1.260676  | 2.472162  | 3.887750  |
| C  | 1.155536  | 2.008119  | 2.894651  |
| H  | 1.091339  | -0.864347 | 3.905431  |
| P  | -0.261407 | 0.852754  | 2.832509  |
| H  | 0.239946  | 0.127981  | 5.124436  |
| C  | 0.142439  | -0.361400 | 4.142905  |
| H  | -1.832903 | 2.698480  | 2.965460  |
| H  | -1.298902 | 2.192551  | 4.597733  |
| C  | -1.600770 | 1.832052  | 3.602110  |
| H  | -0.648858 | -1.124203 | 4.195612  |
| H  | -2.507310 | 1.217327  | 3.702806  |
| O  | -7.335555 | -1.022520 | 0.450188  |
| H  | -8.940235 | -1.714449 | -1.531001 |
| C  | -6.591340 | -0.965398 | -0.504677 |
| H  | -8.046434 | -3.153320 | -0.960059 |
| C  | -8.058098 | -2.347403 | -1.708927 |
| O  | -6.862696 | -1.588241 | -1.661084 |
| H  | -8.112047 | -2.779250 | -2.715395 |

78

Figure 3 para-CO2Me ts(AS)\_01 / electronic energy: -3887.94585044 a.u. / lowest freq: -275.06 cm<sup>-1</sup>

|   |           |           |           |
|---|-----------|-----------|-----------|
| C | -0.237810 | -1.039093 | -0.868720 |
| C | -0.077884 | -1.884157 | 0.250857  |
| C | 1.034448  | -1.794730 | 1.089113  |
| O | 2.395414  | -3.366193 | 0.558327  |
| P | 3.432250  | -2.857152 | -0.433162 |
| O | 3.050611  | -2.047912 | -1.630491 |
| O | 4.509960  | -2.030787 | 0.498946  |
| O | 4.326246  | -4.125030 | -0.946811 |
| C | 5.629952  | -1.441325 | -0.116409 |
| H | -1.113474 | -1.162156 | -1.510033 |
| H | 0.647034  | -0.583549 | -1.330317 |
| H | -0.885333 | -2.567131 | 0.532624  |
| H | 1.825087  | -1.069829 | 0.895518  |
| H | 1.021781  | -2.262126 | 2.071280  |
| B | 0.549762  | 2.388425  | -1.444083 |
| O | 1.542229  | 1.637894  | -2.013130 |
| O | 1.046626  | 3.431542  | -0.703880 |
| C | 2.794875  | 2.057777  | -1.437322 |
| C | 2.462206  | 3.522149  | -0.984202 |
| C | 3.889986  | 1.931361  | -2.481775 |
| C | 3.072758  | 1.116824  | -0.269460 |
| C | 2.633210  | 4.546804  | -2.103932 |
| C | 3.204006  | 3.983788  | 0.258228  |
| H | 2.134433  | 4.222377  | -3.029323 |
| H | 3.695302  | 4.725842  | -2.324936 |
| H | 2.182401  | 5.499940  | -1.790613 |
| H | 2.998016  | 3.343290  | 1.123852  |
| H | 2.906472  | 5.011823  | 0.513419  |
| H | 4.289143  | 3.981503  | 0.075251  |
| H | 2.280391  | 1.198192  | 0.491413  |
| H | 4.037105  | 1.331651  | 0.212923  |
| H | 3.092444  | 0.085263  | -0.651773 |
| H | 4.844739  | 2.314399  | -2.090473 |
| H | 3.642743  | 2.476883  | -3.402054 |
| H | 4.023971  | 0.870397  | -2.738321 |
| C | -3.739903 | 0.788151  | 0.744300  |
| C | -4.974119 | 0.158777  | 0.713421  |
| C | -2.911802 | 0.861173  | -0.398659 |
| C | -5.447442 | -0.427085 | -0.468886 |
| C | -3.413629 | 0.281051  | -1.582754 |
| C | -4.649670 | -0.353267 | -1.617279 |
| C | -1.575507 | 1.498721  | -0.314016 |
| C | -0.966348 | 2.024275  | -1.613580 |
| H | -5.007077 | -0.791561 | -2.550546 |
| H | -2.827242 | 0.328142  | -2.501861 |

|    |           |           |           |
|----|-----------|-----------|-----------|
| H  | -5.597598 | 0.120439  | 1.609331  |
| H  | -3.399813 | 1.247243  | 1.674137  |
| Cu | -0.495683 | 0.134414  | 0.727716  |
| H  | -1.542661 | 2.896658  | -1.978148 |
| H  | -1.013773 | 1.263326  | -2.407192 |
| H  | -1.600458 | 2.297954  | 0.443205  |
| H  | 6.133144  | -0.804322 | 0.625947  |
| H  | 5.343607  | -0.820674 | -0.981828 |
| H  | 6.349369  | -2.203082 | -0.465323 |
| C  | 4.790756  | -5.069106 | -0.009554 |
| H  | 5.397977  | -5.810087 | -0.549144 |
| H  | 3.955687  | -5.587124 | 0.489984  |
| H  | 5.419328  | -4.599018 | 0.766797  |
| H  | 2.116467  | 1.751066  | 2.694605  |
| H  | 0.939610  | 2.968450  | 2.118813  |
| H  | 1.181433  | 2.710191  | 3.881070  |
| C  | 1.142409  | 2.218722  | 2.897175  |
| H  | 1.301250  | -0.679120 | 3.917752  |
| P  | -0.161853 | 0.942942  | 2.859917  |
| H  | 0.420901  | 0.287560  | 5.142024  |
| C  | 0.332298  | -0.225965 | 4.172464  |
| H  | -1.952597 | 2.588613  | 2.905842  |
| H  | -1.326225 | 2.251174  | 4.549093  |
| C  | -1.601828 | 1.797859  | 3.584824  |
| H  | -0.417148 | -1.026802 | 4.254713  |
| H  | -2.418553 | 1.080308  | 3.750111  |
| O  | -7.508804 | -1.136315 | 0.506279  |
| H  | -9.177351 | -1.524625 | -1.551676 |
| C  | -6.778728 | -1.085328 | -0.456808 |
| H  | -8.460780 | -3.071893 | -1.008702 |
| C  | -8.368825 | -2.248514 | -1.731908 |
| O  | -7.097955 | -1.624220 | -1.636788 |
| H  | -8.444781 | -2.641569 | -2.752440 |

78

Figure 3 para-CO2Me\_ts(AS)\_02 / electronic energy: -3887.94832102 a.u. / lowest freq: -271.05 cm<sup>-1</sup>

|    |           |           |           |
|----|-----------|-----------|-----------|
| C  | -0.843389 | -1.663203 | -0.704559 |
| C  | -0.911702 | -2.011216 | 0.670226  |
| C  | 0.201900  | -1.856262 | 1.503156  |
| O  | 1.364985  | -3.615098 | 1.455695  |
| P  | 2.147792  | -3.631248 | 0.146146  |
| O  | 2.369791  | -2.363665 | -0.622396 |
| O  | 3.556848  | -4.369630 | 0.516414  |
| O  | 1.455012  | -4.698010 | -0.882097 |
| C  | 4.508517  | -4.561143 | -0.507806 |
| H  | -1.725690 | -1.782394 | -1.338237 |
| H  | 0.131102  | -1.717639 | -1.200588 |
| H  | -1.849170 | -2.369225 | 1.106262  |
| H  | 1.098690  | -1.363285 | 1.125168  |
| H  | 0.101439  | -1.961632 | 2.582667  |
| B  | -3.159088 | 1.291339  | -1.257956 |
| O  | -4.020794 | 1.706036  | -0.272923 |
| O  | -3.531191 | 0.092488  | -1.802200 |
| C  | -4.875729 | 0.593926  | 0.055426  |
| C  | -4.810532 | -0.277077 | -1.254365 |
| C  | -6.260494 | 1.107201  | 0.411223  |
| C  | -4.241315 | -0.093787 | 1.262422  |
| C  | -5.870071 | 0.108305  | -2.283610 |
| C  | -4.830187 | -1.778520 | -1.015605 |
| H  | -5.873630 | 1.192492  | -2.470640 |
| H  | -6.876736 | -0.193983 | -1.961036 |
| H  | -5.647820 | -0.398212 | -3.234212 |
| H  | -3.988870 | -2.103712 | -0.389443 |
| H  | -4.760716 | -2.308391 | -1.976999 |
| H  | -5.767740 | -2.081600 | -0.525804 |
| H  | -3.219667 | -0.432853 | 1.028434  |
| H  | -4.829205 | -0.957019 | 1.604836  |
| H  | -4.180386 | 0.628051  | 2.089712  |
| H  | -6.954779 | 0.268809  | 0.572049  |
| H  | -6.669299 | 1.755804  | -0.374259 |
| H  | -6.214337 | 1.690728  | 1.342587  |
| C  | 1.848661  | 0.906976  | -1.153115 |
| C  | 3.109573  | 1.438832  | -0.933015 |
| C  | 0.699504  | 1.731445  | -1.224571 |
| C  | 3.285574  | 2.822800  | -0.775964 |
| C  | 0.896343  | 3.117989  | -1.065757 |
| C  | 2.161353  | 3.651372  | -0.845803 |
| C  | -0.641785 | 1.122590  | -1.421131 |
| C  | -1.839280 | 2.054162  | -1.620963 |
| H  | 2.293122  | 4.729747  | -0.733205 |
| H  | 0.046673  | 3.799214  | -1.130225 |
| H  | 3.970984  | 0.771046  | -0.879590 |
| H  | 1.759673  | -0.180089 | -1.245182 |
| Cu | -0.802434 | 0.058889  | 0.288652  |
| H  | -1.866420 | 2.447406  | -2.655842 |
| H  | -1.784097 | 2.929642  | -0.957696 |
| H  | -0.595955 | 0.382785  | -2.229949 |
| H  | 5.425798  | -4.955431 | -0.048031 |
| H  | 4.744157  | -3.614115 | -1.020227 |
| H  | 4.153110  | -5.285793 | -1.260836 |
| C  | 1.046408  | -5.957153 | -0.399205 |
| H  | 0.638458  | -6.527178 | -1.246109 |
| H  | 0.267677  | -5.860653 | 0.375238  |
| H  | 1.891011  | -6.523353 | 0.030401  |
| H  | 1.611983  | 0.960054  | 2.719660  |
| H  | 1.505762  | 2.366797  | 1.628658  |
| H  | 1.095203  | 2.551887  | 3.365681  |
| C  | 1.044107  | 1.875991  | 2.498277  |

|   |           |           |           |
|---|-----------|-----------|-----------|
| H | -0.800210 | -0.151962 | 3.934304  |
| P | -0.682742 | 1.438083  | 2.103432  |
| H | -1.210215 | 1.503354  | 4.489226  |
| C | -1.334072 | 0.773567  | 3.674294  |
| H | -1.025821 | 3.628142  | 1.141853  |
| H | -1.521636 | 3.602751  | 2.863328  |
| C | -1.534430 | 3.038781  | 1.918360  |
| H | -2.402481 | 0.538263  | 3.565309  |
| H | -2.572117 | 2.863129  | 1.598746  |
| O | 4.799345  | 4.632087  | -0.404016 |
| H | 7.024422  | 3.556331  | 0.614338  |
| C | 4.615230  | 3.445736  | -0.553236 |
| H | 7.183587  | 3.770119  | -1.154702 |
| C | 6.921861  | 3.056224  | -0.360070 |
| O | 5.607829  | 2.551887  | -0.540307 |
| H | 7.593577  | 2.190987  | -0.403444 |

78

Figure 3\_para-CO2Me\_pi-allyl\_01 / electronic energy: -3887.97108875 a.u. / lowest freq: 20.87 cm-1

|    |           |           |           |
|----|-----------|-----------|-----------|
| C  | -1.064258 | -1.683443 | -1.652510 |
| C  | -1.790985 | -2.328145 | -0.618258 |
| C  | -1.201528 | -2.562325 | 0.613419  |
| O  | 1.865716  | -2.334262 | 1.014445  |
| P  | 2.602297  | -2.632938 | -0.266627 |
| O  | 1.976543  | -2.416663 | -1.617612 |
| O  | 4.027307  | -1.818125 | -0.169654 |
| O  | 3.119260  | -4.191714 | -0.249317 |
| C  | 4.919924  | -1.891501 | -1.254959 |
| H  | -1.598619 | -1.379796 | -2.554312 |
| H  | 0.021090  | -1.872640 | -1.734551 |
| H  | -2.879947 | -2.384971 | -0.706906 |
| H  | -0.105580 | -2.623700 | 0.735424  |
| H  | -1.824300 | -2.884259 | 1.452529  |
| B  | -3.361817 | 1.245888  | -0.776445 |
| O  | -4.165404 | 1.542048  | 0.293534  |
| O  | -3.879536 | 0.244734  | -1.553816 |
| C  | -5.194780 | 0.535116  | 0.361667  |
| C  | -5.240562 | 0.021719  | -1.121411 |
| C  | -6.485628 | 1.162626  | 0.858509  |
| C  | -4.705420 | -0.524665 | 1.348110  |
| C  | -6.135222 | 0.874832  | -2.018755 |
| C  | -5.598137 | -1.445657 | -1.277120 |
| H  | -5.916635 | 1.947184  | -1.905592 |
| H  | -7.199986 | 0.712155  | -1.799945 |
| H  | -5.954683 | 0.601481  | -3.068550 |
| H  | -4.932199 | -2.102997 | -0.704772 |
| H  | -5.539012 | -1.733518 | -2.336930 |
| H  | -6.628163 | -1.622854 | -0.933410 |
| H  | -3.779036 | -1.002938 | 0.995474  |
| H  | -5.459347 | -1.307570 | 1.513187  |
| H  | -4.498793 | -0.043157 | 2.315214  |
| H  | -7.306520 | 0.430969  | 0.823006  |
| H  | -6.769462 | 2.039193  | 0.261647  |
| H  | -6.365681 | 1.487683  | 1.902471  |
| C  | 1.707111  | 0.847708  | -1.246996 |
| C  | 2.982524  | 1.315821  | -0.970669 |
| C  | 0.567786  | 1.643533  | -1.011305 |
| C  | 3.171782  | 2.605835  | -0.455884 |
| C  | 0.773239  | 2.941736  | -0.511363 |
| C  | 2.053181  | 3.413969  | -0.236007 |
| C  | -0.791948 | 1.084932  | -1.279262 |
| C  | -1.996639 | 1.987196  | -1.022250 |
| H  | 2.195818  | 4.423119  | 0.156424  |
| H  | -0.075970 | 3.604201  | -0.338549 |
| H  | 3.839925  | 0.663441  | -1.131402 |
| H  | 1.599425  | -0.179855 | -1.607723 |
| Cu | -0.975460 | -0.479741 | -0.028238 |
| H  | -2.127523 | 2.684048  | -1.873960 |
| H  | -1.835222 | 2.620568  | -0.139792 |
| H  | -0.819801 | 0.694965  | -2.302391 |
| H  | 5.743032  | -1.185803 | -1.069558 |
| H  | 4.427003  | -1.626767 | -2.205150 |
| H  | 5.347976  | -2.904126 | -1.363804 |
| C  | 3.674785  | -4.705570 | 0.936837  |
| H  | 3.915840  | -5.765506 | 0.768053  |
| H  | 2.967325  | -4.629833 | 1.779298  |
| H  | 4.602638  | -4.176463 | 1.218539  |
| H  | 1.688448  | -0.420316 | 2.053965  |
| H  | 1.588042  | 1.329343  | 1.683760  |
| H  | 1.408415  | 0.783145  | 3.384615  |
| C  | 1.202559  | 0.530407  | 2.333149  |
| H  | -0.599038 | -1.702094 | 3.373217  |
| P  | -0.584327 | 0.336571  | 2.067347  |
| H  | -0.902569 | -0.268528 | 4.403033  |
| C  | -1.127518 | -0.740586 | 3.434495  |
| H  | -0.863715 | 2.730674  | 1.850485  |
| H  | -1.158397 | 2.188277  | 3.528214  |
| C  | -1.328805 | 1.949561  | 2.467459  |
| H  | -2.209925 | -0.921645 | 3.366024  |
| H  | -2.408730 | 1.926982  | 2.259041  |
| O  | 4.719347  | 4.221355  | 0.384955  |
| H  | 6.948792  | 2.864850  | 0.946862  |
| C  | 4.518877  | 3.141742  | -0.121154 |
| H  | 7.086484  | 3.630418  | -0.664575 |
| C  | 6.825092  | 2.703065  | -0.134020 |
| O  | 5.500800  | 2.296168  | -0.440694 |
| H  | 7.481632  | 1.889421  | -0.463348 |

78



Figure 3 para-CO2Me\_pi-allyl\_O2 / electronic energy: -3887.96383511 a.u. / lowest freq: 21.15 cm<sup>-1</sup>

|    |           |           |           |
|----|-----------|-----------|-----------|
| C  | -0.807470 | -0.074775 | -2.058156 |
| C  | -0.674831 | -1.461347 | -1.806138 |
| C  | 0.452974  | -1.923744 | -1.142044 |
| O  | 3.228041  | -3.287554 | -0.195673 |
| P  | 4.042106  | -2.132989 | -0.705417 |
| O  | 3.412958  | -0.979918 | -1.443868 |
| O  | 4.889107  | -1.559302 | 0.589986  |
| O  | 5.262770  | -2.673634 | -1.666256 |
| C  | 5.798655  | -0.506980 | 0.392949  |
| H  | -1.752589 | 0.316837  | -2.439338 |
| H  | 0.088693  | 0.533836  | -2.229522 |
| H  | -1.566778 | -2.095535 | -1.870333 |
| H  | 1.420092  | -1.394079 | -1.211936 |
| H  | 0.500421  | -2.948932 | -0.767960 |
| B  | 0.265167  | 2.922515  | -0.299151 |
| O  | 1.221623  | 2.164922  | -0.919788 |
| O  | 0.801169  | 3.910678  | 0.474781  |
| C  | 2.494865  | 2.492742  | -0.322239 |
| C  | 2.225300  | 3.940582  | 0.222319  |
| C  | 3.582298  | 2.377084  | -1.375768 |
| C  | 2.725638  | 1.466790  | 0.783165  |
| C  | 2.470697  | 5.025172  | -0.823767 |
| C  | 2.951500  | 4.274935  | 1.513843  |
| H  | 1.968612  | 4.789480  | -1.773982 |
| H  | 3.544043  | 5.157470  | -1.021499 |
| H  | 2.068926  | 5.980231  | -0.454224 |
| H  | 2.651954  | 3.606040  | 2.331252  |
| H  | 2.723738  | 5.307686  | 1.816745  |
| H  | 4.039990  | 4.192754  | 1.375062  |
| H  | 1.922641  | 1.511030  | 1.536001  |
| H  | 3.686244  | 1.624383  | 1.294279  |
| H  | 2.748340  | 0.470967  | 0.317810  |
| H  | 4.545275  | 2.726861  | -0.972413 |
| H  | 3.345244  | 2.969059  | -2.270165 |
| H  | 3.683030  | 1.318078  | -1.660015 |
| C  | -3.563905 | -0.037852 | 1.149707  |
| C  | -4.836151 | -0.576112 | 1.035094  |
| C  | -3.036110 | 0.828330  | 0.170300  |
| C  | -5.643080 | -0.260343 | -0.065693 |
| C  | -3.868847 | 1.154809  | -0.915946 |
| C  | -5.146880 | 0.618702  | -1.035210 |
| C  | -1.641212 | 1.331383  | 0.302248  |
| C  | -1.267316 | 2.608796  | -0.444924 |
| H  | -5.769155 | 0.887133  | -1.890540 |
| H  | -3.514362 | 1.843509  | -1.685060 |
| H  | -5.223807 | -1.250143 | 1.801639  |
| H  | -2.953225 | -0.291801 | 2.019251  |
| Cu | -0.509166 | -0.300250 | -0.068219 |
| H  | -1.872264 | 3.452190  | -0.065927 |
| H  | -1.485121 | 2.523368  | -1.521928 |
| H  | -1.406851 | 1.448054  | 1.370546  |
| H  | 6.107241  | -0.127193 | 1.378932  |
| H  | 5.349708  | 0.321313  | -0.179178 |
| H  | 6.702466  | -0.843462 | -0.145877 |
| C  | 5.992994  | -3.800366 | -1.248905 |
| H  | 6.723190  | -4.046755 | -2.033951 |
| H  | 5.335725  | -4.670752 | -1.085442 |
| H  | 6.542843  | -3.609151 | -0.309540 |
| H  | 0.354412  | 0.891861  | 3.253124  |
| H  | -1.296340 | 0.233449  | 3.425622  |
| H  | 0.061481  | -0.518759 | 4.317854  |
| C  | -0.230645 | -0.031574 | 3.375463  |
| H  | 2.483939  | -0.844330 | 2.206652  |
| P  | 0.091155  | -1.147880 | 1.970971  |
| H  | 1.874976  | -2.195739 | 3.205706  |
| C  | 1.799604  | -1.702569 | 2.224050  |
| H  | -1.983380 | -2.411098 | 2.180766  |
| H  | -0.737550 | -2.989449 | 3.335558  |
| C  | -0.914105 | -2.631669 | 2.309879  |
| H  | 2.115832  | -2.401228 | 1.430770  |
| H  | -0.632528 | -3.423263 | 1.600493  |
| O  | -7.452061 | -1.629838 | 0.675088  |
| H  | -9.622339 | -0.762794 | -0.568032 |
| C  | -6.997024 | -0.872138 | -0.149603 |
| H  | -8.933515 | -2.135789 | -1.486989 |
| C  | -8.969279 | -1.039304 | -1.408612 |
| O  | -7.666351 | -0.498802 | -1.241341 |
| H  | -9.362258 | -0.613336 | -2.338897 |

39

Figure 4 para-NMe2\_L-Cu-OtBu / electronic energy: -2316.39314463 a.u. / lowest freq: 15.08 cm<sup>-1</sup>

|   |           |           |           |
|---|-----------|-----------|-----------|
| C | -0.498289 | -1.681031 | -0.152427 |
| C | -1.237584 | -1.347445 | -1.296960 |
| C | -0.972772 | -1.195660 | 1.077755  |
| C | -2.117048 | -0.420108 | 1.164329  |
| C | -2.866748 | -0.083896 | 0.006808  |
| C | -2.387165 | -0.574274 | -1.233136 |
| H | -0.433126 | -1.421984 | 2.000711  |
| H | -2.433199 | -0.070901 | 2.146691  |
| H | -2.914625 | -0.347791 | -2.159106 |
| H | -0.893051 | -1.698055 | -2.274189 |
| C | 0.753302  | -2.444880 | -0.295478 |
| C | 1.630903  | -2.802337 | 0.703754  |
| H | 0.930584  | -2.850613 | -1.299387 |
| H | 1.426444  | -2.608632 | 1.761807  |
| H | 2.439541  | -3.506045 | 0.485823  |
| H | 4.298713  | 2.871785  | 0.015425  |

|    |           |           |           |
|----|-----------|-----------|-----------|
| H  | 3.509208  | 2.904737  | -1.577772 |
| C  | 3.326495  | 2.970794  | -0.493313 |
| O  | 2.994493  | 0.630073  | -0.377034 |
| H  | 2.916786  | 3.969814  | -0.270799 |
| C  | 2.389030  | 1.833825  | -0.053365 |
| H  | 3.101309  | 1.791959  | 2.002391  |
| H  | 1.185507  | 1.850956  | -1.864681 |
| C  | 2.150477  | 1.936142  | 1.464495  |
| C  | 1.038819  | 1.982646  | -0.780483 |
| H  | 1.722253  | 2.906564  | 1.767228  |
| H  | 0.565379  | 2.964444  | -0.610641 |
| H  | 1.455039  | 1.143091  | 1.789784  |
| H  | 0.332986  | 1.204281  | -0.442150 |
| Cu | 2.180374  | -0.979899 | -0.070442 |
| H  | -3.715353 | 1.862691  | 1.825944  |
| H  | -5.384116 | 1.738855  | 1.224422  |
| C  | -4.451297 | 1.180414  | 1.364695  |
| H  | -4.655702 | 0.366484  | 2.081475  |
| H  | -4.116738 | 1.611727  | -1.816209 |
| N  | -4.001101 | 0.675892  | 0.086451  |
| H  | -5.608480 | 1.615344  | -0.849938 |
| C  | -4.728955 | 1.017009  | -1.115351 |
| H  | -5.083448 | 0.119332  | -1.650825 |

81

Figure 4\_para-NMe2\_ed / electronic energy: -3138.15747466 a.u. / lowest freq: 11.30 cm-1

|    |           |           |           |
|----|-----------|-----------|-----------|
| H  | 4.204122  | -2.473274 | -1.322121 |
| H  | 4.869496  | -1.220495 | -0.256980 |
| O  | 2.575860  | -0.360423 | -1.543458 |
| C  | 4.718839  | -1.500848 | -1.307941 |
| H  | 5.707407  | -1.623681 | -1.778208 |
| C  | 3.894428  | -0.448334 | -2.056020 |
| H  | 3.213778  | -1.847023 | -3.573003 |
| H  | 4.725237  | 1.242237  | -0.955942 |
| C  | 3.727242  | -0.874611 | -3.515756 |
| C  | 4.585723  | 0.918059  | -1.995265 |
| H  | 3.117702  | -0.136792 | -4.059537 |
| H  | 4.700270  | -0.965702 | -4.022722 |
| H  | 3.968341  | 1.674862  | -2.503299 |
| H  | 5.568541  | 0.880918  | -2.491556 |
| Cu | 0.484364  | -1.494231 | -0.171853 |
| H  | 0.053852  | 3.682072  | 1.605925  |
| H  | 0.408602  | 4.663620  | -0.642665 |
| H  | 1.461989  | 3.287071  | -0.174371 |
| C  | 0.738814  | 3.651343  | -0.918904 |
| H  | -1.512230 | 4.335165  | 1.050586  |
| H  | 1.257408  | 3.711193  | -1.887357 |
| C  | -0.990230 | 3.425468  | 1.385049  |
| H  | -1.462527 | 3.089452  | 2.320561  |
| C  | -1.091758 | 2.328946  | 0.335072  |
| C  | -0.436088 | 2.681463  | -1.047479 |
| O  | -0.308662 | 1.203183  | 0.758760  |
| H  | -1.911994 | 4.092972  | -1.782999 |
| B  | 0.339330  | 0.651268  | -0.337602 |
| H  | -0.871054 | 3.383663  | -3.040820 |
| C  | -1.411988 | 3.167558  | -2.107379 |
| O  | 0.115686  | 1.420097  | -1.457376 |
| H  | -3.219659 | 2.667540  | -0.059796 |
| C  | -2.536005 | 1.850374  | 0.214319  |
| H  | -2.859951 | 1.440988  | 1.182259  |
| H  | -2.178900 | 2.413450  | -2.329004 |
| H  | -2.626037 | 1.050049  | -0.533307 |
| H  | 4.527594  | -1.720908 | 2.211271  |
| H  | 5.105012  | 0.210458  | 1.295198  |
| H  | 3.176300  | -2.681617 | 2.847966  |
| C  | 3.579665  | -1.661267 | 2.761322  |
| O  | 2.412552  | -1.258334 | 0.719012  |
| H  | 4.915830  | 0.741558  | 2.987754  |
| C  | 4.563054  | 0.899008  | 1.957656  |
| H  | 3.785779  | -1.292445 | 3.777551  |
| B  | 2.203261  | -0.119295 | -0.201627 |
| H  | 4.827637  | 1.925871  | 1.663411  |
| C  | 2.563926  | -0.772973 | 2.050999  |
| C  | 3.046491  | 0.728557  | 1.835564  |
| O  | 2.696036  | 1.028660  | 0.493849  |
| H  | 0.894180  | -1.939992 | 2.751545  |
| C  | 1.220276  | -0.887936 | 2.779148  |
| H  | 1.305724  | -0.595116 | 3.835999  |
| H  | 0.445685  | -0.264713 | 2.312057  |
| H  | 2.567530  | 1.498699  | 3.822379  |
| C  | 2.361858  | 1.728110  | 2.765388  |
| H  | 2.746600  | 2.739212  | 2.561324  |
| H  | 1.277785  | 1.738281  | 2.601325  |
| H  | -0.870315 | -2.609096 | -2.025216 |
| H  | -2.879863 | -1.563980 | -2.649096 |
| H  | 0.519423  | -3.980540 | -0.579614 |
| C  | -1.101005 | -2.628051 | -0.952876 |
| C  | -3.215039 | -1.503768 | -1.609667 |
| C  | -0.291797 | -3.391745 | -0.140590 |
| H  | -5.039144 | -0.546093 | -2.170250 |
| C  | -2.390627 | -2.010391 | -0.595848 |
| C  | -4.446391 | -0.923689 | -1.337868 |
| H  | -0.565185 | -3.629841 | 0.892540  |
| C  | -2.859005 | -1.901423 | 0.723029  |
| C  | -4.919896 | -0.813034 | -0.008560 |
| H  | -2.242273 | -2.259312 | 1.551737  |
| C  | -4.084561 | -1.326090 | 1.016550  |
| H  | -4.386869 | -1.256257 | 2.060869  |

|   |           |           |           |
|---|-----------|-----------|-----------|
| H | -7.200782 | -0.328076 | -1.545018 |
| H | -7.792631 | 0.850694  | -0.357603 |
| C | -6.885786 | 0.402621  | -0.780441 |
| H | -6.319907 | 1.203342  | -1.290347 |
| H | -6.634912 | -1.041893 | 2.160383  |
| N | -6.120783 | -0.217873 | 0.277142  |
| H | -7.533665 | 0.407593  | 1.674105  |
| C | -6.546114 | -0.067800 | 1.650187  |
| H | -5.853898 | 0.561081  | 2.239554  |

81

Figure 4\_para-NMe2\_ts(TB) / electronic energy: -3138.15700613 a.u. / lowest freq: -44.46 cm-1

|    |           |           |           |
|----|-----------|-----------|-----------|
| H  | 4.417597  | -2.241907 | -1.596214 |
| H  | 5.020680  | -1.053167 | -0.418788 |
| O  | 2.632610  | -0.255388 | -1.516362 |
| C  | 4.855490  | -1.238012 | -1.490115 |
| H  | 5.834890  | -1.230791 | -1.992960 |
| C  | 3.930462  | -0.181259 | -2.098787 |
| H  | 3.278768  | -1.464964 | -3.725064 |
| H  | 4.700610  | 1.434633  | -0.851599 |
| C  | 3.717252  | -0.464957 | -3.584574 |
| C  | 4.519934  | 1.219684  | -1.913441 |
| H  | 3.025128  | 0.274312  | -4.015646 |
| H  | 4.667341  | -0.419601 | -4.138201 |
| H  | 3.821245  | 1.977859  | -2.298262 |
| H  | 5.472582  | 1.313785  | -2.457729 |
| Cu | 0.476209  | -1.436993 | -0.292358 |
| H  | 0.107788  | 3.608624  | 1.762222  |
| H  | 0.430173  | 4.636838  | -0.474018 |
| H  | 1.415086  | 3.188866  | -0.081537 |
| C  | 0.686693  | 3.614008  | -0.788097 |
| H  | -1.443559 | 4.358829  | 1.296103  |
| H  | 1.170024  | 3.669797  | -1.774935 |
| C  | -0.957013 | 3.412982  | 1.580497  |
| H  | -1.405552 | 3.074049  | 2.526733  |
| C  | -1.160805 | 2.356237  | 0.504661  |
| C  | -0.548886 | 2.719593  | -0.893394 |
| O  | -0.425245 | 1.176905  | 0.854326  |
| H  | -1.977972 | 4.237619  | -1.507878 |
| B  | 0.106704  | 0.600153  | -0.297058 |
| H  | -1.030940 | 3.526007  | -2.837108 |
| C  | -1.541560 | 3.301224  | -1.888633 |
| O  | -0.098232 | 1.443879  | -1.371912 |
| H  | -3.287425 | 2.820174  | 0.228496  |
| C  | -2.634866 | 1.957918  | 0.432277  |
| H  | -2.932926 | 1.518664  | 1.395827  |
| H  | -2.355877 | 2.596459  | -2.103975 |
| H  | -2.800483 | 1.198564  | -0.344922 |
| H  | 4.514148  | -1.881689 | 2.205318  |
| H  | 5.083014  | 0.116849  | 1.448091  |
| H  | 3.155038  | -2.912848 | 2.699525  |
| C  | 3.541672  | -1.882731 | 2.714063  |
| O  | 2.468858  | -1.341919 | 0.650076  |
| H  | 4.826211  | 0.528329  | 3.165438  |
| C  | 4.506962  | 0.750730  | 2.136688  |
| H  | 3.693294  | -1.593648 | 3.764852  |
| B  | 2.352890  | -0.158709 | -0.159478 |
| H  | 4.761125  | 1.799177  | 1.921062  |
| C  | 2.542366  | -0.957739 | 2.030856  |
| C  | 3.000241  | 0.563086  | 1.953128  |
| O  | 2.692813  | 0.951418  | 0.617070  |
| H  | 0.857554  | -2.199502 | 2.537416  |
| C  | 1.166549  | -1.151060 | 2.672389  |
| H  | 1.200099  | -0.951232 | 3.753282  |
| H  | 0.407012  | -0.495795 | 2.224920  |
| H  | 2.407742  | 1.170165  | 3.960362  |
| C  | 2.254419  | 1.480542  | 2.915535  |
| H  | 2.636925  | 2.507361  | 2.810407  |
| H  | 1.181150  | 1.492358  | 2.690966  |
| H  | -0.796972 | -2.492390 | -2.254887 |
| H  | -2.775166 | -1.347780 | -2.763368 |
| H  | 0.657329  | -3.920590 | -0.938162 |
| C  | -1.021749 | -2.614406 | -1.188347 |
| C  | -3.123864 | -1.410614 | -1.728664 |
| C  | -0.174373 | -3.406422 | -0.447536 |
| H  | -4.913740 | -0.341308 | -2.186335 |
| C  | -2.322333 | -2.054070 | -0.776148 |
| C  | -4.342978 | -0.833982 | -1.399947 |
| H  | -0.425299 | -3.735824 | 0.565907  |
| C  | -2.803629 | -2.091457 | 0.541813  |
| C  | -4.826216 | -0.865441 | -0.070235 |
| H  | -2.208796 | -2.564081 | 1.328037  |
| C  | -4.015806 | -1.518625 | 0.892634  |
| H  | -4.329277 | -1.566417 | 1.935037  |
| H  | -6.543546 | -1.257822 | 2.076392  |
| H  | -7.404097 | 0.254733  | 1.735358  |
| C  | -6.429851 | -0.242630 | 1.659660  |
| H  | -5.719123 | 0.309027  | 2.301973  |
| N  | -6.012309 | -0.271352 | 0.276416  |
| H  | -7.672797 | 0.870218  | -0.254111 |
| C  | -6.760583 | 0.470461  | -0.712471 |
| H  | -7.066463 | -0.166598 | -1.559895 |
| H  | -6.186029 | 1.322169  | -1.120435 |

81

Figure 4\_para-NMe2\_prod / electronic energy: -3138.17640839 a.u. / lowest freq: 16.18 cm-1

|   |          |           |           |
|---|----------|-----------|-----------|
| H | 6.224452 | -0.802365 | -1.263057 |
| H | 5.767131 | -0.093661 | 0.310918  |
| O | 3.566993 | -0.595087 | -1.218047 |

|    |           |           |           |
|----|-----------|-----------|-----------|
| C  | 5.845342  | 0.104476  | -0.767333 |
| H  | 6.578210  | 0.911249  | -0.919026 |
| C  | 4.489559  | 0.502500  | -1.347181 |
| H  | 4.959130  | -0.144553 | -3.363909 |
| H  | 3.839549  | 1.546984  | 0.448392  |
| C  | 4.596696  | 0.756590  | -2.846479 |
| C  | 3.909615  | 1.723671  | -0.635094 |
| H  | 3.613409  | 1.023374  | -3.262107 |
| H  | 5.297209  | 1.579490  | -3.052021 |
| H  | 2.900692  | 1.946605  | -1.013587 |
| H  | 4.549543  | 2.603891  | -0.797800 |
| Cu | 0.324225  | -0.636409 | -1.182082 |
| H  | 0.131419  | 2.647383  | 2.992026  |
| H  | 1.247250  | 4.509135  | 1.718618  |
| H  | 1.771926  | 2.832401  | 1.392899  |
| C  | 1.361739  | 3.744578  | 0.935463  |
| H  | -1.022480 | 4.002704  | 2.839846  |
| H  | 2.095910  | 4.113444  | 0.203783  |
| C  | -0.855757 | 2.939023  | 2.609000  |
| H  | -1.612050 | 2.352976  | 3.153073  |
| C  | -0.981666 | 2.679038  | 1.114395  |
| C  | 0.040209  | 3.459765  | 0.219287  |
| O  | -0.634692 | 1.317700  | 0.842905  |
| H  | -0.803402 | 5.455381  | 0.393513  |
| B  | 0.023232  | 1.221392  | -0.389734 |
| H  | 0.278709  | 5.226132  | -1.000753 |
| C  | -0.500718 | 4.744609  | -0.391073 |
| O  | 0.311365  | 2.515481  | -0.827144 |
| H  | -2.808705 | 3.877617  | 0.913161  |
| C  | -2.434265 | 2.870643  | 0.675084  |
| H  | -3.062895 | 2.134170  | 1.197475  |
| H  | -1.364158 | 4.552249  | -1.041463 |
| H  | -2.548095 | 2.698699  | -0.405058 |
| H  | 3.199330  | -3.833982 | 1.013727  |
| H  | 3.963147  | -2.865567 | 2.943115  |
| H  | 1.560341  | -4.293812 | 0.496574  |
| C  | 2.131023  | -3.747654 | 1.261864  |
| O  | 1.887357  | -1.778203 | -0.057419 |
| H  | 2.570723  | -2.485681 | 3.996650  |
| C  | 3.305717  | -2.060690 | 3.296820  |
| H  | 1.958967  | -4.235113 | 2.231927  |
| B  | 3.068631  | -1.057184 | -0.057617 |
| H  | 3.922281  | -1.338599 | 3.852110  |
| C  | 1.675643  | -2.291981 | 1.278744  |
| C  | 2.603612  | -1.355178 | 2.148260  |
| O  | 3.594363  | -0.920557 | 1.195485  |
| H  | -0.379791 | -2.878306 | 0.972850  |
| C  | 0.196336  | -2.197478 | 1.616997  |
| H  | 0.024365  | -2.497745 | 2.661542  |
| H  | -0.192144 | -1.178914 | 1.475347  |
| H  | 1.165995  | -0.349398 | 3.444638  |
| C  | 1.887528  | -0.105262 | 2.651919  |
| H  | 2.632522  | 0.588109  | 3.069699  |
| H  | 1.343280  | 0.403677  | 1.844650  |
| H  | -1.041754 | -0.760079 | -3.373408 |
| H  | -2.839605 | 0.650207  | -2.645006 |
| H  | 0.631610  | -2.496796 | -3.012373 |
| C  | -1.150559 | -1.423244 | -2.507770 |
| C  | -3.189885 | -0.116594 | -1.947888 |
| C  | -0.193178 | -2.382404 | -2.303091 |
| H  | -4.904898 | 1.037099  | -1.417990 |
| C  | -2.425199 | -1.279496 | -1.775976 |
| C  | -4.364013 | 0.107224  | -1.245036 |
| H  | -0.310744 | -3.174571 | -1.557878 |
| C  | -2.912457 | -2.231423 | -0.870021 |
| C  | -4.845039 | -0.843182 | -0.311472 |
| H  | -2.367580 | -3.166220 | -0.714496 |
| C  | -4.086433 | -2.028894 | -0.155641 |
| H  | -4.414072 | -2.805990 | 0.534227  |
| H  | -5.750918 | -1.833387 | 2.134370  |
| H  | -7.405049 | -1.281480 | 1.790537  |
| C  | -6.475332 | -1.629994 | 1.325575  |
| H  | -6.691810 | -2.587947 | 0.820137  |
| H  | -6.108842 | 1.491212  | 0.471150  |
| N  | -5.995040 | -0.625907 | 0.404674  |
| H  | -7.587449 | 0.615607  | 0.917526  |
| C  | -6.728001 | 0.607439  | 0.236536  |
| H  | -7.113425 | 0.729380  | -0.791691 |

46

Figure 4\_para-NMe2\_L-Cu-Bpin / electronic energy: -2494.38389228 a.u. / lowest freq: 19.78 cm-1

|   |          |           |           |
|---|----------|-----------|-----------|
| H | 4.799727 | -1.415644 | -2.552250 |
| H | 5.475356 | -0.107818 | -1.560557 |
| C | 5.040299 | -1.115093 | -1.521252 |
| H | 2.808444 | -2.662696 | -1.862332 |
| O | 2.855620 | -0.165281 | -1.134220 |
| H | 5.800872 | -1.811273 | -1.134869 |
| C | 3.782342 | -1.156385 | -0.665646 |
| C | 3.103125 | -2.519542 | -0.811947 |
| B | 2.158354 | 0.368157  | -0.053667 |
| H | 3.774257 | -3.344235 | -0.529284 |
| H | 4.982641 | 1.136059  | 0.299253  |
| H | 2.193385 | -2.579750 | -0.196068 |
| H | 6.097709 | -0.137237 | 0.872268  |
| C | 5.098489 | 0.302797  | 1.008129  |
| C | 3.987366 | -0.733797 | 0.827789  |
| O | 2.745653 | -0.079343 | 1.126549  |
| H | 5.039673 | 0.715904  | 2.026139  |

|    |           |           |           |
|----|-----------|-----------|-----------|
| H  | 5.096116  | -2.462449 | 1.541583  |
| C  | 4.194100  | -1.885951 | 1.800027  |
| H  | 3.334398  | -2.568865 | 1.811330  |
| H  | 4.324421  | -1.492596 | 2.819570  |
| Cu | 0.554196  | 1.615224  | -0.133750 |
| C  | -2.255257 | 1.543002  | 0.142642  |
| C  | -2.964751 | 1.138133  | 1.283683  |
| C  | -2.494206 | 0.827379  | -1.044055 |
| C  | -3.397369 | -0.220707 | -1.095716 |
| C  | -4.127242 | -0.619417 | 0.054472  |
| C  | -3.877648 | 0.093813  | 1.252799  |
| H  | -1.954131 | 1.087886  | -1.957878 |
| H  | -3.536961 | -0.738011 | -2.044257 |
| H  | -4.400243 | -0.168001 | 2.172324  |
| H  | -2.799242 | 1.662495  | 2.229260  |
| C  | -1.304797 | 2.660731  | 0.233473  |
| C  | -0.647700 | 3.271861  | -0.794387 |
| H  | -1.175502 | 3.076775  | 1.240265  |
| H  | -0.830772 | 3.019930  | -1.843789 |
| H  | -0.039482 | 4.159905  | -0.602622 |
| H  | -4.358148 | -2.813226 | -1.638393 |
| H  | -6.015393 | -3.126180 | -1.083342 |
| C  | -5.271698 | -2.336794 | -1.243075 |
| H  | -5.663729 | -1.657769 | -2.020930 |
| H  | -5.118539 | -2.335573 | 2.010711  |
| N  | -5.026737 | -1.649141 | 0.005068  |
| H  | -6.443952 | -2.851465 | 0.946803  |
| C  | -5.777570 | -2.014295 | 1.185551  |
| H  | -6.402275 | -1.181875 | 1.555097  |

70

Figure 4 para-NMe2\_pcl / electronic energy: -2937.58317342 a.u. / lowest freq: -6.61 cm-1

|    |           |           |           |
|----|-----------|-----------|-----------|
| H  | -1.371180 | 3.037561  | -0.097667 |
| C  | -2.950545 | 1.837672  | 0.804587  |
| C  | -1.606225 | 2.189138  | 0.544298  |
| H  | -4.181872 | 0.424900  | 1.915077  |
| C  | -3.168357 | 0.737398  | 1.664231  |
| H  | 4.336200  | 3.243287  | -1.706808 |
| C  | -0.554190 | 1.450291  | 1.070858  |
| H  | 3.782918  | 1.310772  | -3.119092 |
| H  | 0.465532  | 1.745226  | 0.808677  |
| C  | -2.105348 | 0.006997  | 2.175280  |
| C  | -0.770590 | 0.334148  | 1.896304  |
| C  | 4.992771  | 2.653095  | -1.049642 |
| C  | 4.577876  | 0.746609  | -2.608877 |
| H  | 4.875684  | 3.036540  | -0.027288 |
| O  | 3.320561  | 0.975162  | -0.590498 |
| H  | -2.321071 | -0.854098 | 2.813882  |
| H  | 5.526789  | 0.942737  | -3.129980 |
| H  | 6.032415  | 2.822237  | -1.369970 |
| C  | 4.631306  | 1.178416  | -1.142756 |
| C  | 0.328320  | -0.483202 | 2.435713  |
| B  | 3.279900  | -0.258386 | 0.045452  |
| H  | 1.915755  | 0.988289  | 2.331725  |
| C  | 1.642716  | -0.052027 | 2.525073  |
| C  | 5.508463  | 0.229394  | -0.256646 |
| H  | 5.174893  | 1.392867  | 1.561608  |
| O  | 4.561163  | -0.782266 | 0.127687  |
| H  | 6.782812  | 1.645982  | 0.826245  |
| H  | 7.371941  | 0.336855  | -1.367016 |
| C  | 6.000378  | 0.899314  | 1.026881  |
| H  | 2.357767  | -0.624867 | 3.123355  |
| C  | 6.676150  | -0.423643 | -0.979844 |
| H  | 6.421566  | 0.132068  | 1.693408  |
| H  | 7.234414  | -1.066888 | -0.283082 |
| Cu | 1.569465  | -1.097849 | 0.758229  |
| H  | 0.034285  | -1.401941 | 2.953388  |
| H  | 4.343406  | -0.324245 | -2.702513 |
| H  | 6.339283  | -1.049460 | -1.816766 |
| H  | -2.143209 | -3.635660 | 0.845726  |
| H  | 0.262131  | -3.431218 | 0.836454  |
| H  | -4.374579 | -2.870709 | 0.240550  |
| C  | -2.239700 | -2.786663 | 0.162258  |
| C  | -3.515143 | -2.351459 | -0.183000 |
| C  | 0.250952  | -2.677671 | 0.041034  |
| H  | 1.375316  | -2.014567 | -1.688587 |
| C  | -1.082039 | -2.179334 | -0.340536 |
| C  | 1.405310  | -2.502443 | -0.709910 |
| C  | -3.697681 | -1.241087 | -1.036008 |
| C  | -1.266809 | -1.094596 | -1.212625 |
| H  | 2.272124  | -3.144672 | -0.532834 |
| C  | -2.530114 | -0.635945 | -1.556406 |
| H  | -0.397088 | -0.574429 | -1.623165 |
| H  | -2.604586 | 0.222789  | -2.222589 |
| H  | -5.554660 | 2.428652  | 1.694840  |
| H  | -6.052455 | 2.806586  | 0.024811  |
| C  | -5.355418 | 2.212000  | 0.627974  |
| H  | -5.584212 | 1.149697  | 0.446176  |
| H  | -3.275987 | 4.526328  | 0.111491  |
| N  | -4.000603 | 2.525964  | 0.237706  |
| H  | -4.690166 | 4.130536  | -0.897698 |
| C  | -3.743878 | 3.736665  | -0.506600 |
| H  | -3.082895 | 3.551571  | -1.369934 |
| H  | -6.144101 | -1.609787 | 0.189220  |
| H  | -7.023841 | -0.923277 | -1.186206 |
| C  | -6.123066 | -1.483630 | -0.906030 |
| H  | -6.192813 | -2.490054 | -1.361437 |
| H  | -4.736777 | -0.009156 | -3.320588 |

```

N -4.953449 -0.753022 -1.333886
H -4.551635 1.204051 -2.019951
C -5.097469 0.294084 -2.319328
H -6.157537 0.560157 -2.411306
70

```

Figure 4\_para-NMe2\_ts(CuBadd)\_01 / electronic energy: -2937.57583746 a.u. / lowest freq: -173.04 cm-1

```

H 1.267216 2.947995 0.443482
C 2.750572 1.874417 -0.730806
C 1.440029 2.179614 -0.310238
H 3.862961 0.600775 -2.103040
C 2.879257 0.877198 -1.723342
H -3.876822 2.861787 2.271666
C 0.337100 1.495522 -0.814271
H -3.553994 0.603232 3.173528
H -0.648677 1.756084 -0.418425
C 1.770744 0.205259 -2.219094
C 0.460261 0.483640 -1.785908
C -4.569231 2.517486 1.489120
C -4.371206 0.250807 2.527058
H -4.393187 3.125689 0.592423
O -3.042271 0.857618 0.635050
H 1.925475 -0.573149 -2.972282
H -5.319779 0.389141 3.065776
H -5.596222 2.697648 1.841372
C -4.346638 1.038653 1.217809
C -0.682718 -0.286159 -2.284884
B -3.119493 -0.191936 -0.257164
H -2.242230 1.151281 -1.751342
C -2.050449 0.097770 -1.995975
C -5.283139 0.424001 0.117530
H -4.772452 1.942837 -1.369012
O -4.422149 -0.561038 -0.491870
H -6.368603 2.179580 -0.606505
H -7.156343 0.446511 1.209181
C -5.658986 1.424219 -0.974057
H -2.805188 -0.304104 -2.681352
C -6.527455 -0.264777 0.652578
H -6.134128 0.884669 -1.806672
H -7.122562 -0.662394 -0.182852
Cu -1.456624 -1.300846 -0.695884
H -0.501502 -0.940275 -3.142487
H -4.222150 -0.824867 2.350432
H -6.274151 -1.101778 1.316197
H 2.083153 -3.579348 -1.030674
H -0.284905 -3.594108 -0.734069
H 4.318345 -2.740264 -0.559548
C 2.198694 -2.777310 -0.295481
C 3.475680 -2.297575 -0.028963
C -0.276349 -2.796191 0.017337
H -1.390483 -2.115441 1.767807
C 1.060451 -2.268446 0.345511
C -1.436722 -2.616668 0.795874
C 3.681903 -1.246044 0.892244
C 1.270933 -1.238336 1.277437
H -2.277005 -3.304989 0.664212
C 2.537113 -0.741505 1.551831
H 0.418502 -0.791389 1.795971
H 2.628549 0.068223 2.275007
H 6.020974 -1.359565 -0.576679
H 6.990875 -0.777025 0.788755
C 6.091622 -1.347291 0.524236
H 6.240721 -2.390908 0.861270
H 4.502307 1.152031 1.985346
N 4.936194 -0.725483 1.125341
H 6.169880 0.583468 2.173665
C 5.121983 0.259174 2.165530
H 4.880491 -0.132792 3.171904
H 5.249937 2.638310 -1.800969
H 5.918969 2.794444 -0.155356
C 5.161239 2.276423 -0.757431
H 5.414109 1.204291 -0.746561
H 3.161303 4.498223 0.147939
N 3.856910 2.507440 -0.185712
H 4.637742 4.014072 1.021601
C 3.663600 3.656539 0.664481
H 3.062321 3.407476 1.555153
70

```

Figure 4\_para-NMe2\_ts(CuBadd)\_02 / electronic energy: -2937.56458202 a.u. / lowest freq: -194.19 cm-1

```

H -3.563543 3.487368 0.078929
C -1.708859 4.562316 -0.295700
C -2.525692 3.413075 -0.246954
H 0.320819 5.206876 -0.757740
C -0.371724 4.365898 -0.710924
H -5.637367 -2.257196 0.625067
C -2.041389 2.158411 -0.611383
H -3.992106 -2.464117 2.427626
H -2.725993 1.307987 -0.541481
C 0.097195 3.108941 -1.072519
C -0.715180 1.958907 -1.039367
C -5.072047 -2.913985 -0.052703
C -3.500425 -3.267595 1.859704
H -5.190645 -2.527266 -1.073345
O -3.020521 -1.660591 0.158679
H 1.141666 3.009142 -1.383807
H -3.990116 -4.218305 2.115131
H -5.520691 -3.917672 -0.001496
C -3.612068 -2.957305 0.367400

```

|    |           |           |           |
|----|-----------|-----------|-----------|
| C  | -0.168327 | 0.642584  | -1.385774 |
| B  | -1.703677 | -1.853393 | -0.197326 |
| H  | -2.074616 | -0.351332 | -1.789053 |
| C  | -1.012848 | -0.529500 | -1.570538 |
| C  | -2.701226 | -3.877359 | -0.521061 |
| H  | -3.306429 | -2.924392 | -2.392418 |
| O  | -1.443440 | -3.170440 | -0.492935 |
| H  | -4.080385 | -4.505742 | -2.097897 |
| H  | -3.462080 | -5.803132 | 0.119311  |
| C  | -3.149319 | -3.932704 | -1.980289 |
| H  | -0.588295 | -1.305448 | -2.217241 |
| C  | -2.497719 | -5.281648 | 0.022746  |
| H  | -2.365695 | -4.422938 | -2.576672 |
| H  | -1.865010 | -5.863370 | -0.663952 |
| Cu | -0.233373 | -0.502868 | 0.274602  |
| H  | 0.822653  | 0.631843  | -1.848908 |
| H  | -2.449468 | -3.315203 | 2.182663  |
| H  | -2.006697 | -5.268566 | 1.004437  |
| H  | 3.023176  | 1.850603  | 1.299032  |
| H  | 0.899771  | 1.020922  | 1.981290  |
| H  | 5.273760  | 1.582051  | 0.413082  |
| C  | 3.356366  | 0.850997  | 1.004502  |
| C  | 4.640826  | 0.698762  | 0.496988  |
| C  | 1.118855  | -0.012680 | 1.689095  |
| H  | -0.582984 | -0.752222 | 2.795481  |
| C  | 2.475852  | -0.231222 | 1.149029  |
| C  | 0.247622  | -1.022895 | 2.136578  |
| C  | 5.121280  | -0.569373 | 0.093817  |
| C  | 2.951383  | -1.488922 | 0.743591  |
| H  | 0.569263  | -2.067464 | 2.194441  |
| C  | 4.229665  | -1.661287 | 0.229189  |
| H  | 2.302688  | -2.366393 | 0.816733  |
| H  | 4.536288  | -2.663965 | -0.068600 |
| H  | -0.717132 | 7.116253  | -0.741652 |
| H  | -1.805426 | 7.821885  | 0.461652  |
| C  | -1.256690 | 6.909049  | 0.197349  |
| H  | -0.499975 | 6.726745  | 0.985966  |
| H  | -4.283988 | 5.547605  | -0.009507 |
| N  | -2.188935 | 5.818128  | 0.044929  |
| H  | -3.712945 | 6.990702  | 0.842955  |
| C  | -3.491978 | 5.932498  | 0.654241  |
| H  | -3.570010 | 5.391228  | 1.618058  |
| H  | 6.195941  | -2.447290 | -1.642964 |
| H  | 7.854762  | -1.963954 | -1.231610 |
| C  | 6.833609  | -2.038438 | -0.838977 |
| H  | 6.843860  | -2.773238 | -0.013800 |
| H  | 6.901764  | 1.175393  | -1.187598 |
| N  | 6.391159  | -0.734125 | -0.405988 |
| H  | 8.254554  | 0.064005  | -0.883137 |
| C  | 7.282437  | 0.397828  | -0.500679 |
| H  | 7.455385  | 0.872831  | 0.481479  |

70

Figure 4 para-NMe2\_L-Cu-alkyl\_01 / electronic energy: -2937.61855973 a.u. / lowest freq: 28.24 cm-1

|    |           |           |           |
|----|-----------|-----------|-----------|
| H  | 1.007223  | 3.304130  | 0.305896  |
| C  | 2.370554  | 1.951600  | -0.707919 |
| C  | 1.101542  | 2.451490  | -0.367942 |
| H  | 3.338709  | 0.440813  | -1.942959 |
| C  | 2.391612  | 0.868449  | -1.612910 |
| H  | -3.430490 | 2.886824  | 2.553021  |
| C  | -0.072126 | 1.876395  | -0.863261 |
| H  | -1.636700 | 1.274401  | 2.066088  |
| H  | -1.024446 | 2.298081  | -0.536180 |
| C  | 1.215673  | 0.304319  | -2.091079 |
| C  | -0.064938 | 0.770911  | -1.730704 |
| C  | -4.220924 | 2.196801  | 2.222493  |
| C  | -2.402808 | 0.507541  | 1.880579  |
| H  | -5.010655 | 2.791426  | 1.745159  |
| O  | -3.204980 | 1.815084  | 0.062663  |
| H  | 1.292898  | -0.549491 | -2.773080 |
| H  | -2.627394 | 0.003573  | 2.831606  |
| H  | -4.639409 | 1.707396  | 3.114883  |
| C  | -3.640760 | 1.166304  | 1.270309  |
| C  | -1.296672 | 0.074848  | -2.219934 |
| B  | -3.338857 | 0.906081  | -0.960704 |
| H  | -2.347633 | 1.983605  | -2.648953 |
| C  | -2.576812 | 0.949109  | -2.325373 |
| C  | -4.671290 | 0.118704  | 0.716232  |
| H  | -6.046888 | 1.658735  | 0.002128  |
| O  | -4.146110 | -0.146985 | -0.595811 |
| H  | -6.571383 | 0.853018  | 1.507473  |
| H  | -4.996898 | -0.994721 | 2.550344  |
| C  | -6.072951 | 0.698989  | 0.539344  |
| H  | -3.232577 | 0.511590  | -3.096786 |
| C  | -4.732122 | -1.182473 | 1.498862  |
| H  | -6.679951 | -0.003187 | -0.050919 |
| H  | -5.496203 | -1.846450 | 1.067795  |
| Cu | -1.421244 | -1.486869 | -0.977192 |
| H  | -1.068323 | -0.340799 | -3.217565 |
| H  | -1.975052 | -0.230267 | 1.181854  |
| H  | -3.770537 | -1.709737 | 1.465016  |
| H  | 2.167774  | -3.679584 | -1.183204 |
| H  | -0.195004 | -3.770569 | -1.076940 |
| H  | 4.323505  | -2.719607 | -0.589068 |
| C  | 2.202981  | -2.898333 | -0.418576 |
| C  | 3.433019  | -2.350566 | -0.081590 |
| C  | -0.263513 | -3.098466 | -0.212406 |
| H  | -1.552811 | -2.546241 | 1.425333  |

|   |           |           |           |
|---|-----------|-----------|-----------|
| C | 1.012184  | -2.485792 | 0.193572  |
| C | -1.461402 | -3.033929 | 0.450046  |
| C | 3.530039  | -1.323094 | 0.886721  |
| C | 1.108188  | -1.464431 | 1.155546  |
| H | -2.298035 | -3.662146 | 0.130792  |
| C | 2.322208  | -0.896063 | 1.496752  |
| H | 0.205401  | -1.079691 | 1.637433  |
| H | 2.330525  | -0.092839 | 2.232184  |
| H | 4.892439  | 2.453086  | -1.833554 |
| H | 5.626180  | 2.581951  | -0.211035 |
| C | 4.804170  | 2.124325  | -0.777820 |
| H | 4.960446  | 1.035799  | -0.746981 |
| H | 3.143163  | 4.584910  | -0.201003 |
| N | 3.545884  | 2.484456  | -0.169564 |
| H | 4.470874  | 4.039954  | 0.862235  |
| C | 3.477729  | 3.773238  | 0.477019  |
| H | 2.792297  | 3.754933  | 1.338741  |
| H | 5.965600  | -1.166468 | -0.465976 |
| H | 6.807712  | -0.711603 | 1.029108  |
| C | 5.952583  | -1.271757 | 0.633172  |
| H | 6.108570  | -2.339334 | 0.870639  |
| H | 4.171347  | 1.150943  | 1.924737  |
| N | 4.733085  | -0.756917 | 1.212612  |
| H | 5.830993  | 0.642061  | 2.299441  |
| C | 4.796723  | 0.288723  | 2.210752  |
| H | 4.473721  | -0.064332 | 3.206929  |

70

Figure 4 para-NMe2\_L-Cu-alkyl\_02 / electronic energy: -2937.61545910 a.u. / lowest freq: 21.88 cm-1

|    |           |           |           |
|----|-----------|-----------|-----------|
| C  | -2.999364 | -2.133815 | -0.536684 |
| C  | -2.986210 | -1.097159 | -1.482874 |
| C  | -3.565156 | -1.848965 | 0.716164  |
| C  | -4.070781 | -0.594899 | 1.017778  |
| C  | -4.026459 | 0.461440  | 0.073326  |
| C  | -3.490356 | 0.162343  | -1.201893 |
| H  | -3.614535 | -2.626184 | 1.482857  |
| H  | -4.503301 | -0.433424 | 2.004443  |
| H  | -3.438650 | 0.929245  | -1.973440 |
| H  | -2.548261 | -1.279740 | -2.468297 |
| C  | -2.362122 | -3.418959 | -0.867168 |
| C  | -2.113950 | -4.468010 | -0.022275 |
| H  | -2.123151 | -3.552720 | -1.929538 |
| H  | -2.450192 | -4.473423 | 1.019763  |
| H  | -1.745767 | -5.416110 | -0.424074 |
| B  | 3.410343  | -1.049985 | -0.086124 |
| O  | 3.977735  | -0.334260 | -1.110115 |
| O  | 3.782042  | -0.565854 | 1.144198  |
| C  | 4.895638  | 0.617798  | -0.545531 |
| C  | 4.397909  | 0.717373  | 0.944809  |
| C  | 4.805203  | 1.917154  | -1.330864 |
| C  | 6.296674  | 0.021803  | -0.673024 |
| C  | 3.309502  | 1.773960  | 1.142298  |
| C  | 5.502135  | 0.909124  | 1.972289  |
| H  | 2.499547  | 1.661001  | 0.406286  |
| H  | 3.716231  | 2.793118  | 1.067393  |
| H  | 2.868682  | 1.649937  | 2.142415  |
| H  | 6.224991  | 0.082985  | 1.956963  |
| H  | 5.065244  | 0.959054  | 2.980726  |
| H  | 6.041804  | 1.851172  | 1.791137  |
| H  | 6.387206  | -0.916726 | -0.105912 |
| H  | 7.069117  | 0.720693  | -0.320601 |
| H  | 6.494485  | -0.202261 | -1.731852 |
| H  | 5.413911  | 2.702571  | -0.857791 |
| H  | 3.768781  | 2.271981  | -1.404930 |
| H  | 5.184604  | 1.764077  | -2.352328 |
| C  | -0.233320 | 0.073798  | 1.213879  |
| C  | -0.782352 | 1.335191  | 1.020931  |
| C  | 0.493709  | -0.606633 | 0.218346  |
| C  | -0.651254 | 2.010593  | -0.210912 |
| C  | 0.626377  | 0.080982  | -0.999400 |
| C  | 0.084530  | 1.350030  | -1.211455 |
| C  | 1.064107  | -1.972587 | 0.460490  |
| C  | 2.398948  | -2.238775 | -0.279531 |
| H  | 0.241159  | 1.820155  | -2.182976 |
| H  | 1.186365  | -0.375764 | -1.819157 |
| H  | -1.329454 | 1.792946  | 1.845656  |
| H  | -0.369818 | -0.408332 | 2.187790  |
| Cu | -0.476928 | -3.134107 | 0.037298  |
| H  | 2.252976  | -2.423901 | -1.357833 |
| H  | 2.845317  | -3.169723 | 0.113412  |
| H  | 1.257764  | -2.053599 | 1.544971  |
| H  | -4.439375 | 1.674633  | 2.493395  |
| H  | -5.307953 | 3.036094  | 1.767436  |
| C  | -5.103601 | 1.963546  | 1.663448  |
| H  | -6.059598 | 1.420521  | 1.787601  |
| H  | -3.644801 | 2.920571  | -1.136672 |
| N  | -4.482633 | 1.717495  | 0.381484  |
| H  | -4.985687 | 3.645267  | -0.228223 |
| C  | -4.617007 | 2.708915  | -0.664297 |
| H  | -5.329531 | 2.395258  | -1.449656 |
| H  | -0.904965 | 4.249063  | 1.440192  |
| H  | -2.156175 | 4.947107  | 0.374588  |
| C  | -1.708213 | 4.004553  | 0.715799  |
| H  | -2.492249 | 3.450726  | 1.255772  |
| H  | 0.237441  | 4.250345  | -1.615837 |
| N  | -1.237482 | 3.259087  | -0.426576 |
| H  | -1.403835 | 4.954325  | -1.624690 |
| C  | -0.845238 | 4.009478  | -1.594561 |



H -1.082640 3.463247 -2.521563

70

Figure 4\_para-NMe2\_L-Cu-alkyl\_03 / electronic energy: -2937.61764213 a.u. / lowest freq: 21.08 cm<sup>-1</sup>

B 3.591087 1.251832 -0.135976  
O 4.249845 0.587186 -1.143675  
O 4.276068 1.186668 1.051584  
C 5.290927 -0.200165 -0.540674  
C 5.552298 0.573273 0.803681  
C 6.483023 -0.264992 -1.481083  
C 4.716982 -1.599297 -0.321070  
C 6.575360 1.698125 0.652190  
C 5.918931 -0.311684 1.984812  
H 6.334238 2.347244 -0.202850  
H 7.593102 1.304353 0.516668  
H 6.564623 2.317925 1.561038  
H 5.124167 -1.033325 2.214643  
H 6.080537 0.308631 2.878901  
H 6.848920 -0.864709 1.783199  
H 3.857187 -1.573283 0.366609  
H 5.468905 -2.293308 0.081616  
H 4.366772 -1.993840 -1.286388  
H 7.330407 -0.777102 -1.000460  
H 6.809264 0.735960 -1.792406  
H 6.214697 -0.829960 -2.386396  
C -1.232092 1.033972 1.258578  
C -2.584009 1.329187 1.148270  
C -0.271811 1.458067 0.316596  
C -3.085059 2.074263 0.057957  
C -0.776895 2.231361 -0.739854  
C -2.135801 2.532598 -0.871969  
C 1.162929 1.047405 0.446823  
C 2.186918 1.921465 -0.303106  
H -2.445611 3.139125 -1.723896  
H -0.092762 2.617991 -1.499756  
H -3.259571 0.957836 1.919210  
H -0.901433 0.431975 2.112074  
Cu 1.142414 -0.854725 -0.121258  
H 2.181499 2.971697 0.057504  
H 1.961644 1.961258 -1.382253  
H 1.423960 1.043563 1.521044  
H -3.564200 -0.818998 -1.977758  
C -3.127510 -1.369928 -1.146091  
H -1.236605 -1.456793 -2.119652  
C -1.796565 -1.735836 -1.223580  
C -3.907406 -1.675189 -0.000228  
H 0.845287 -2.288686 -2.230091  
C -3.264839 -2.375940 1.048324  
C -1.156289 -2.428497 -0.180168  
C 1.153489 -2.643990 -1.241306  
H -3.809863 -2.641972 1.953300  
C -1.926210 -2.729152 0.952294  
C 0.268718 -2.795325 -0.207360  
H -1.460251 -3.256903 1.789520  
H 0.623030 -3.317752 0.690045  
H 2.153267 -3.078991 -1.166463  
H -5.079586 2.739754 1.911258  
H -6.358753 2.307877 0.742840  
C -5.321160 2.101413 1.037031  
H -5.281304 1.051808 1.364671  
H -4.460117 4.325853 -0.854548  
N -4.450328 2.327379 -0.091485  
H -5.961299 3.381707 -1.061031  
C -4.865423 3.313966 -1.059055  
H -4.557404 3.032421 -2.078881  
H -5.558681 -1.278573 2.177753  
H -7.007658 -1.242376 1.155338  
C -6.001450 -1.668668 1.245672  
H -6.104095 -2.763943 1.353758  
H -5.386699 0.298596 -1.287385  
N -5.220696 -1.299795 0.086720  
H -6.914179 -0.451981 -0.782035  
C -5.868930 -0.661116 -1.038799  
H -5.865749 -1.301035 -1.939576

70

Figure 4\_para-NMe2\_ts(BHE) / electronic energy: -2937.57872574 a.u. / lowest freq: -844.05 cm<sup>-1</sup>

B -3.572840 0.691576 0.047383  
O -4.595866 1.346271 0.670996  
O -4.000206 -0.175344 -0.918664  
C -5.821823 0.694021 0.280073  
C -5.418833 0.029728 -1.088783  
C -6.930838 1.727571 0.183171  
C -6.141398 -0.328344 1.368947  
C -5.595220 0.967227 -2.280770  
C -6.086160 -1.307017 -1.365038  
H -5.122173 1.943657 -2.098453  
H -6.657683 1.131490 -2.510631  
H -5.116750 0.519415 -3.164021  
H -5.840089 -2.051523 -0.596906  
H -5.749904 -1.698052 -2.336763  
H -7.179639 -1.190575 -1.405827  
H -5.348387 -1.086692 1.454113  
H -7.096053 -0.839579 1.179810  
H -6.215671 0.190808 2.335631  
H -7.852863 1.268489 -0.203978  
H -6.653099 2.563793 -0.471795  
H -7.147460 2.136275 1.181191  
C 1.294688 1.018287 -1.356926

|    |           |           |           |
|----|-----------|-----------|-----------|
| C  | 2.605204  | 1.454649  | -1.222030 |
| C  | 0.348920  | 1.130970  | -0.320360 |
| C  | 3.072311  | 2.022177  | -0.015833 |
| C  | 0.814913  | 1.718923  | 0.870323  |
| C  | 2.127218  | 2.162018  | 1.020136  |
| C  | -1.015586 | 0.616187  | -0.485972 |
| C  | -2.074125 | 0.898602  | 0.443146  |
| H  | 2.412643  | 2.606958  | 1.973586  |
| H  | 0.137549  | 1.837321  | 1.720523  |
| H  | 3.281638  | 1.325975  | -2.067004 |
| H  | 0.989206  | 0.566400  | -2.305245 |
| Cu | -1.211443 | -0.942474 | 0.855985  |
| H  | -1.919369 | 1.721022  | 1.152479  |
| H  | -2.260593 | -0.081587 | 1.691345  |
| H  | -1.284624 | 0.241019  | -1.478119 |
| H  | 3.976393  | -0.812520 | 1.833958  |
| C  | 3.426693  | -1.288169 | 1.022197  |
| H  | 1.669294  | -1.432045 | 2.222913  |
| C  | 2.103929  | -1.642855 | 1.242179  |
| C  | 4.044907  | -1.499054 | -0.233315 |
| H  | -0.252619 | -2.600744 | 2.603819  |
| C  | 3.266065  | -2.128268 | -1.230469 |
| C  | 1.318853  | -2.240160 | 0.242748  |
| C  | -0.773833 | -2.725812 | 1.649129  |
| H  | 3.688675  | -2.336733 | -2.212933 |
| C  | 1.940230  | -2.469084 | -0.992523 |
| C  | -0.099191 | -2.600773 | 0.428382  |
| H  | 1.366709  | -2.934352 | -1.799641 |
| H  | -0.573978 | -3.040408 | -0.457272 |
| H  | -1.703583 | -3.300859 | 1.690259  |
| H  | 5.396688  | -1.011632 | -2.588620 |
| H  | 6.966309  | -0.965871 | -1.767624 |
| C  | 5.966176  | -1.414958 | -1.734435 |
| H  | 6.078741  | -2.504523 | -1.891934 |
| H  | 5.674212  | 0.305159  | 1.069289  |
| N  | 5.337875  | -1.093383 | -0.475172 |
| H  | 7.118812  | -0.263863 | 0.214902  |
| C  | 6.143936  | -0.578142 | 0.607627  |
| H  | 6.322983  | -1.330067 | 1.399427  |
| H  | 4.934264  | 3.169905  | -1.778479 |
| H  | 6.277430  | 2.713782  | -0.696212 |
| C  | 5.262226  | 2.440436  | -1.011542 |
| H  | 5.327976  | 1.451246  | -1.490991 |
| H  | 4.251088  | 4.147166  | 1.371172  |
| N  | 4.396786  | 2.405384  | 0.142783  |
| H  | 5.852133  | 3.366293  | 1.279628  |
| C  | 4.772292  | 3.171403  | 1.306194  |
| H  | 4.564469  | 2.620514  | 2.238452  |

70

Figure 4\_para-NMe2\_pc2 / electronic energy: -2937.60609935 a.u. / lowest freq: 21.56 cm<sup>-1</sup>

|    |           |           |           |
|----|-----------|-----------|-----------|
| B  | 3.399923  | 0.892410  | 0.227561  |
| O  | 4.509456  | 1.497390  | -0.293715 |
| O  | 3.700867  | -0.205496 | 0.992774  |
| C  | 5.611159  | 0.584072  | -0.112312 |
| C  | 5.134777  | -0.265547 | 1.123258  |
| C  | 6.889645  | 1.372484  | 0.114917  |
| C  | 5.716898  | -0.240878 | -1.393926 |
| C  | 5.492845  | 0.375484  | 2.462249  |
| C  | 5.570649  | -1.721411 | 1.100565  |
| H  | 5.199826  | 1.435473  | 2.493049  |
| H  | 6.570929  | 0.305742  | 2.666977  |
| H  | 4.955925  | -0.148784 | 3.266634  |
| H  | 5.170544  | -2.248116 | 0.224431  |
| H  | 5.203589  | -2.233345 | 2.002481  |
| H  | 6.668257  | -1.799385 | 1.088195  |
| H  | 4.793620  | -0.809182 | -1.581415 |
| H  | 6.564104  | -0.940653 | -1.358625 |
| H  | 5.864973  | 0.439613  | -2.245072 |
| H  | 7.721117  | 0.693620  | 0.357479  |
| H  | 6.782716  | 2.102328  | 0.928173  |
| H  | 7.156659  | 1.921357  | -0.800315 |
| C  | -1.471271 | 0.912569  | 1.465071  |
| C  | -2.805822 | 1.272359  | 1.363065  |
| C  | -0.532994 | 1.244039  | 0.477498  |
| C  | -3.288068 | 1.961580  | 0.225802  |
| C  | -1.002902 | 1.966087  | -0.631878 |
| C  | -2.337712 | 2.320924  | -0.760940 |
| C  | 0.862693  | 0.807717  | 0.611739  |
| C  | 1.944246  | 1.368594  | -0.032539 |
| H  | -2.646429 | 2.864978  | -1.653139 |
| H  | -0.310747 | 2.237949  | -1.433522 |
| H  | -3.487154 | 0.981025  | 2.161425  |
| H  | -1.144349 | 0.350358  | 2.344040  |
| Cu | 1.486306  | -0.280227 | -1.271478 |
| H  | 1.788790  | 2.257885  | -0.652722 |
| H  | 2.242398  | 0.169909  | -2.594571 |
| H  | 1.048942  | 0.060756  | 1.392074  |
| H  | -3.761106 | -0.817228 | -1.880892 |
| C  | -3.156731 | -1.296193 | -1.111233 |
| H  | -1.381889 | -1.058098 | -2.272789 |
| C  | -1.796489 | -1.438306 | -1.334919 |
| C  | -3.748476 | -1.726365 | 0.100654  |
| H  | 0.565209  | -2.250175 | -2.751542 |
| C  | -2.897578 | -2.340352 | 1.046915  |
| C  | -0.944342 | -2.015038 | -0.380857 |
| C  | 1.128124  | -2.264475 | -1.813611 |
| H  | -3.296082 | -2.707480 | 1.992479  |

|   |           |           |           |
|---|-----------|-----------|-----------|
| C | -1.532634 | -2.458351 | 0.809654  |
| C | 0.505853  | -2.173566 | -0.593031 |
| H | -0.903523 | -2.916401 | 1.578646  |
| H | 1.086294  | -2.431641 | 0.300419  |
| H | 2.161325  | -2.616162 | -1.876666 |
| H | -5.193910 | -1.667122 | 2.463056  |
| H | -6.736238 | -1.798795 | 1.597489  |
| C | -5.674662 | -2.071228 | 1.556011  |
| H | -5.606604 | -3.174413 | 1.602975  |
| H | -5.600310 | -0.008769 | -1.023192 |
| N | -5.086661 | -1.528606 | 0.353570  |
| H | -6.959301 | -0.876296 | -0.284594 |
| C | -5.944569 | -0.999480 | -0.682565 |
| H | -6.003377 | -1.662929 | -1.565667 |
| H | -5.334955 | 2.557183  | 2.064361  |
| H | -6.565915 | 2.192155  | 0.828360  |
| C | -5.543919 | 1.963887  | 1.154508  |
| H | -5.513506 | 0.897361  | 1.429907  |
| H | -4.618380 | 4.063930  | -1.041100 |
| N | -4.622583 | 2.252792  | 0.078985  |
| H | -6.155534 | 3.167609  | -0.993655 |
| C | -5.065923 | 3.053005  | -1.039807 |
| H | -4.823044 | 2.576150  | -2.004212 |

44

Figure 4\_para-NMe2-alkenylBpin / electronic energy: -853.456934437 a.u. / lowest freq: 23.23 cm-1

|   |           |           |           |
|---|-----------|-----------|-----------|
| B | -2.187170 | -0.365211 | 0.009480  |
| O | -3.150062 | -1.308190 | 0.256850  |
| O | -2.719971 | 0.871376  | -0.253825 |
| C | -4.429772 | -0.720739 | -0.045141 |
| C | -4.122547 | 0.819094  | 0.064576  |
| C | -5.461729 | -1.234491 | 0.945780  |
| C | -4.799537 | -1.155667 | -1.462554 |
| C | -4.280376 | 1.361085  | 1.484676  |
| C | -4.893795 | 1.689895  | -0.914167 |
| H | -3.742396 | 0.739095  | 2.215571  |
| H | -5.337156 | 1.416990  | 1.783044  |
| H | -3.856508 | 2.375071  | 1.528609  |
| H | -4.661526 | 1.436198  | -1.956775 |
| H | -4.636808 | 2.747934  | -0.756642 |
| H | -5.977402 | 1.578257  | -0.758380 |
| H | -4.071062 | -0.786727 | -2.199959 |
| H | -5.798937 | -0.798203 | -1.749417 |
| H | -4.801313 | -2.254633 | -1.510976 |
| H | -6.427272 | -0.727499 | 0.798153  |
| H | -5.140704 | -1.082014 | 1.984379  |
| H | -5.619453 | -2.312545 | 0.794328  |
| C | 2.524789  | 1.319156  | -0.116960 |
| C | 3.911059  | 1.255250  | -0.091630 |
| C | 1.719306  | 0.170822  | -0.054482 |
| C | 4.579018  | 0.009600  | -0.003909 |
| C | 2.385000  | -1.064718 | 0.028476  |
| C | 3.767329  | -1.153399 | 0.052138  |
| C | 0.259119  | 0.304712  | -0.075142 |
| C | -0.668799 | -0.668118 | 0.038170  |
| H | 4.224495  | -2.140270 | 0.117856  |
| H | 1.807980  | -1.991876 | 0.074166  |
| H | 4.477072  | 2.184934  | -0.144841 |
| H | 2.045955  | 2.300298  | -0.188373 |
| H | -0.341817 | -1.706766 | 0.171089  |
| H | -0.096635 | 1.336458  | -0.193713 |
| H | 6.587387  | 1.699032  | -0.957837 |
| H | 6.513293  | 1.810645  | 0.822063  |
| C | 6.741153  | 1.134989  | -0.020836 |
| H | 7.804145  | 0.873333  | 0.040392  |
| N | 5.945699  | -0.071055 | 0.023558  |
| H | 6.334805  | -1.911285 | 1.011367  |
| H | 7.683963  | -1.215909 | 0.088537  |
| C | 6.597253  | -1.359645 | 0.091378  |
| H | 6.341286  | -1.999507 | -0.771386 |

91

Figure 4\_para-NMe2\_pc3\_01 / electronic energy: -3776.45374198 a.u. / lowest freq: 10.37 cm-1

|   |           |           |           |
|---|-----------|-----------|-----------|
| C | -0.175567 | -1.502915 | -0.659644 |
| C | -0.775804 | -1.431034 | 0.578250  |
| C | -0.627727 | -2.523397 | 1.595808  |
| O | -1.678133 | -3.501917 | 1.456009  |
| P | -1.686819 | -4.501593 | 0.205834  |
| O | -0.379719 | -5.000628 | -0.267975 |
| O | -2.712095 | -5.578110 | 0.805034  |
| O | -2.488713 | -3.773074 | -0.979771 |
| C | -3.053239 | -6.719095 | 0.024418  |
| H | -0.518154 | -0.909724 | -1.510426 |
| H | 0.491273  | -2.337799 | -0.901248 |
| H | -1.615263 | -0.745014 | 0.737510  |
| H | 0.349171  | -3.023814 | 1.506218  |
| H | -0.738677 | -2.147456 | 2.620092  |
| B | 0.148375  | 1.784831  | -2.109446 |
| O | -0.887228 | 2.592722  | -1.717111 |
| O | -0.244123 | 0.885515  | -3.070988 |
| C | -2.103307 | 2.102743  | -2.310191 |
| C | -1.565285 | 1.243783  | -3.516197 |
| C | -2.971990 | 3.286683  | -2.705661 |
| C | -2.821143 | 1.266247  | -1.253427 |
| C | -1.400078 | 2.052378  | -4.801685 |
| C | -2.356847 | -0.024485 | -3.799271 |
| H | -0.834008 | 2.979006  | -4.624649 |
| H | -2.372073 | 2.316707  | -5.242468 |
| H | -0.841946 | 1.450502  | -5.533667 |

|    |           |           |           |
|----|-----------|-----------|-----------|
| H  | -2.366473 | -0.709193 | -2.940437 |
| H  | -1.907667 | -0.558718 | -4.649432 |
| H  | -3.397299 | 0.218889  | -4.062485 |
| H  | -2.217077 | 0.400455  | -0.951901 |
| H  | -3.792649 | 0.901314  | -1.616714 |
| H  | -2.990720 | 1.882145  | -0.359733 |
| H  | -3.872981 | 2.946671  | -3.238035 |
| H  | -2.431472 | 3.996036  | -3.345510 |
| H  | -3.294753 | 3.823898  | -1.801102 |
| C  | 4.258457  | -0.768608 | -0.621219 |
| C  | 5.574357  | -0.874365 | -0.187173 |
| C  | 3.554157  | 0.451758  | -0.647121 |
| C  | 6.289641  | 0.256052  | 0.270964  |
| C  | 4.284232  | 1.571952  | -0.219644 |
| C  | 5.606366  | 1.485933  | 0.225591  |
| C  | 2.127351  | 0.496274  | -1.070556 |
| C  | 1.606199  | 1.865907  | -1.533599 |
| H  | 6.104213  | 2.405213  | 0.536282  |
| H  | 3.815343  | 2.559221  | -0.234740 |
| H  | 6.048907  | -1.855996 | -0.208880 |
| H  | 3.749020  | -1.677729 | -0.959740 |
| Cu | 0.918296  | -0.149394 | 0.427460  |
| H  | 2.261857  | 2.298836  | -2.322215 |
| H  | 1.611324  | 2.608214  | -0.716082 |
| H  | 1.989050  | -0.228523 | -1.889625 |
| H  | -3.688929 | -7.358285 | 0.649521  |
| H  | -2.152270 | -7.279038 | -0.268788 |
| H  | -3.611125 | -6.429802 | -0.880395 |
| C  | -3.705746 | -3.078260 | -0.746402 |
| H  | -4.196160 | -2.945871 | -1.719219 |
| H  | -3.511944 | -2.089866 | -0.301898 |
| H  | -4.375067 | -3.649105 | -0.084059 |
| H  | -2.006674 | 4.286585  | 1.114485  |
| C  | -2.003044 | 3.346884  | 1.665126  |
| H  | 0.058023  | 3.041061  | 1.225331  |
| C  | -3.188682 | 2.865216  | 2.270667  |
| C  | -0.818476 | 2.629394  | 1.730127  |
| C  | -3.105440 | 1.621712  | 2.941770  |
| C  | -0.732096 | 1.401251  | 2.403232  |
| H  | -3.984173 | 1.190270  | 3.420292  |
| C  | -1.906634 | 0.922805  | 3.001864  |
| C  | 0.508319  | 0.606246  | 2.473268  |
| H  | -1.884944 | -0.035441 | 3.529405  |
| H  | 0.461042  | -0.282153 | 3.111038  |
| H  | 2.627987  | 0.411541  | 2.234595  |
| C  | 1.731607  | 0.981899  | 1.974559  |
| H  | 1.905853  | 1.966626  | 1.532811  |
| H  | 9.344264  | 1.108889  | 1.349644  |
| H  | 9.332841  | -0.976701 | 0.938612  |
| H  | 8.481826  | 1.973063  | 0.048550  |
| C  | 8.348095  | 1.364486  | 0.965781  |
| H  | 8.461238  | -1.283984 | -0.587420 |
| C  | 8.333987  | -1.061805 | 0.491234  |
| N  | 7.596886  | 0.153996  | 0.738918  |
| H  | 7.864452  | 2.003777  | 1.722182  |
| H  | 7.846972  | -1.933660 | 0.957107  |
| H  | -5.451789 | 5.183116  | 1.454311  |
| H  | -6.388885 | 3.740103  | 2.659943  |
| H  | -3.737016 | 5.537121  | 1.736145  |
| C  | -4.441223 | 4.762824  | 1.387636  |
| H  | -5.453380 | 2.807381  | 3.842652  |
| C  | -5.573293 | 3.014692  | 2.766002  |
| N  | -4.367209 | 3.565525  | 2.193123  |
| H  | -4.225304 | 4.566514  | 0.321067  |
| H  | -5.886505 | 2.075262  | 2.273550  |

91

Figure 4 para-NMe2\_pc3\_O2 / electronic energy: -3776.46237503 a.u. / lowest freq: 23.42 cm<sup>-1</sup>

|   |           |           |           |
|---|-----------|-----------|-----------|
| C | -1.514921 | -1.753517 | -0.851369 |
| C | -0.991846 | -2.137027 | 0.362962  |
| C | 0.489359  | -2.337495 | 0.555718  |
| O | 1.008296  | -3.316590 | -0.363581 |
| P | 2.060646  | -2.848849 | -1.474707 |
| O | 1.599888  | -1.884899 | -2.496143 |
| O | 3.293950  | -2.345146 | -0.575602 |
| O | 2.507915  | -4.242178 | -2.100933 |
| C | 4.060339  | -1.195017 | -0.922956 |
| H | -2.578356 | -1.881227 | -1.073888 |
| H | -0.856301 | -1.589912 | -1.710538 |
| H | -1.652813 | -2.569881 | 1.120900  |
| H | 1.042579  | -1.393763 | 0.432995  |
| H | 0.704410  | -2.706949 | 1.565806  |
| B | -4.340635 | 1.246255  | -0.428050 |
| O | -4.863187 | 1.216411  | 0.845680  |
| O | -4.882983 | 0.268108  | -1.221950 |
| C | -5.575944 | -0.022642 | 1.000992  |
| C | -5.928259 | -0.390606 | -0.489201 |
| C | -6.777654 | 0.194917  | 1.905422  |
| C | -4.604904 | -1.010442 | 1.648526  |
| C | -7.254561 | 0.206299  | -0.956075 |
| C | -5.886875 | -1.878715 | -0.799969 |
| H | -7.310088 | 1.283450  | -0.739080 |
| H | -8.113193 | -0.290597 | -0.481718 |
| H | -7.341617 | 0.075750  | -2.044760 |
| H | -4.892373 | -2.305592 | -0.614403 |
| H | -6.131558 | -2.044359 | -1.859557 |
| H | -6.621946 | -2.426241 | -0.190915 |
| H | -3.700838 | -1.133277 | 1.031920  |

|    |           |           |           |
|----|-----------|-----------|-----------|
| H  | -5.063694 | -1.996506 | 1.807452  |
| H  | -4.292101 | -0.618727 | 2.628047  |
| H  | -7.379856 | -0.723627 | 1.976107  |
| H  | -7.420598 | 1.008012  | 1.544224  |
| H  | -6.438288 | 0.456187  | 2.918777  |
| C  | 0.399675  | 1.226884  | -2.006674 |
| C  | 1.698260  | 1.707705  | -2.064654 |
| C  | -0.658571 | 1.945192  | -1.408616 |
| C  | 2.043373  | 2.961930  | -1.513861 |
| C  | -0.326046 | 3.235692  | -0.965393 |
| C  | 0.980604  | 3.736205  | -1.016208 |
| C  | -1.980080 | 1.291742  | -1.194390 |
| C  | -3.180829 | 2.195786  | -0.881125 |
| H  | 1.160776  | 4.739447  | -0.628530 |
| H  | -1.101640 | 3.879146  | -0.541794 |
| H  | 2.453136  | 1.070620  | -2.525227 |
| H  | 0.219516  | 0.226626  | -2.408477 |
| Cu | -1.502519 | -0.042777 | 0.276440  |
| H  | -3.463057 | 2.832593  | -1.744865 |
| H  | -2.959968 | 2.884384  | -0.048919 |
| H  | -2.221530 | 0.665747  | -2.068079 |
| H  | 4.843740  | -1.101601 | -0.160856 |
| H  | 3.433980  | -0.291954 | -0.908201 |
| H  | 4.526656  | -1.307421 | -1.913629 |
| C  | 3.030156  | -5.304165 | -1.310166 |
| H  | 3.292949  | -6.116145 | -1.999218 |
| H  | 2.278810  | -5.665186 | -0.592458 |
| H  | 3.932094  | -4.983483 | -0.767351 |
| H  | 3.250382  | 1.942129  | 0.797832  |
| C  | 2.771781  | 1.236903  | 1.478492  |
| H  | 0.846744  | 1.928656  | 0.901147  |
| C  | 3.541224  | 0.327985  | 2.242904  |
| C  | 1.387731  | 1.230802  | 1.542274  |
| C  | 2.834394  | -0.547391 | 3.100987  |
| C  | 0.681453  | 0.345518  | 2.372064  |
| H  | 3.371603  | -1.255709 | 3.731453  |
| C  | 1.445301  | -0.530729 | 3.154430  |
| C  | -0.792885 | 0.297550  | 2.399556  |
| H  | 0.938247  | -1.233745 | 3.822153  |
| H  | -1.231275 | -0.511016 | 2.994627  |
| H  | -1.215499 | 2.213699  | 1.513272  |
| C  | -1.618657 | 1.274424  | 1.902632  |
| H  | -2.693752 | 1.254082  | 2.099723  |
| H  | 3.210268  | 4.996516  | -0.095053 |
| H  | 4.729445  | 4.899750  | -0.998127 |
| C  | 3.644307  | 4.751277  | -1.076822 |
| H  | 3.251590  | 5.481746  | -1.812940 |
| H  | 4.399476  | 1.631277  | -2.029237 |
| N  | 3.374159  | 3.379182  | -1.434065 |
| H  | 5.351969  | 3.122054  | -2.033686 |
| C  | 4.358465  | 2.708610  | -2.251874 |
| H  | 4.172810  | 2.819038  | -3.339244 |
| H  | 5.432285  | 2.334163  | 1.814913  |
| H  | 6.674369  | 1.125516  | 1.399935  |
| C  | 5.596178  | 1.326034  | 1.391012  |
| H  | 5.272687  | 1.352294  | 0.337040  |
| H  | 5.555170  | -0.387473 | 4.050745  |
| N  | 4.911489  | 0.294640  | 2.137675  |
| H  | 6.739020  | -0.512999 | 2.727229  |
| C  | 5.674033  | -0.603892 | 2.972676  |
| H  | 5.384010  | -1.654816 | 2.805770  |

91

Figure 4 para-NMe2\_ts(AS)\_01 / electronic energy: -3776.41596452 a.u. / lowest freq: -320.16 cm<sup>-1</sup>

|   |           |           |           |
|---|-----------|-----------|-----------|
| C | -0.549349 | -1.544162 | 0.360646  |
| C | -0.473757 | -1.613072 | -1.063316 |
| C | -1.552141 | -1.210639 | -1.854343 |
| O | -2.882969 | -2.786378 | -2.112357 |
| P | -3.678425 | -2.970530 | -0.821620 |
| O | -3.831765 | -1.840525 | 0.149418  |
| O | -5.123250 | -3.551851 | -1.311867 |
| O | -3.057976 | -4.235477 | 0.011433  |
| C | -6.112771 | -3.806421 | -0.338539 |
| H | 0.256176  | -1.954269 | 0.974609  |
| H | -1.544929 | -1.562553 | 0.815419  |
| H | 0.425566  | -2.007744 | -1.546668 |
| H | -2.385774 | -0.671249 | -1.403585 |
| H | -1.436799 | -1.131418 | -2.934918 |
| B | 1.840759  | 0.338315  | 2.429524  |
| O | 3.087657  | 0.444243  | 1.876382  |
| O | 1.633797  | -0.885579 | 3.010406  |
| C | 3.676086  | -0.869304 | 1.858907  |
| C | 2.886130  | -1.598138 | 3.007058  |
| C | 5.173474  | -0.749105 | 2.088000  |
| C | 3.407318  | -1.460253 | 0.476313  |
| C | 3.517659  | -1.404291 | 4.383968  |
| C | 2.621224  | -3.073385 | 2.755222  |
| H | 3.725308  | -0.342713 | 4.585619  |
| H | 4.456444  | -1.968245 | 4.481802  |
| H | 2.817765  | -1.764300 | 5.152310  |
| H | 2.034155  | -3.233837 | 1.841587  |
| H | 2.061128  | -3.502143 | 3.599202  |
| H | 3.569402  | -3.623899 | 2.660855  |
| H | 2.329509  | -1.563424 | 0.284267  |
| H | 3.878762  | -2.446086 | 0.354870  |
| H | 3.819205  | -0.781902 | -0.282801 |
| H | 5.633039  | -1.744620 | 2.181684  |
| H | 5.403179  | -0.171301 | 2.992752  |

|    |           |           |           |
|----|-----------|-----------|-----------|
| H  | 5.638763  | -0.239337 | 1.230933  |
| C  | -2.890921 | 1.329956  | 1.003579  |
| C  | -3.929572 | 2.153819  | 0.592648  |
| C  | -1.629548 | 1.838837  | 1.381020  |
| C  | -3.781718 | 3.561001  | 0.546191  |
| C  | -1.488222 | 3.235161  | 1.332203  |
| C  | -2.521685 | 4.075829  | 0.924953  |
| C  | -0.514801 | 0.908729  | 1.709317  |
| C  | 0.748597  | 1.463952  | 2.355151  |
| H  | -2.338891 | 5.150520  | 0.913510  |
| H  | -0.539269 | 3.693837  | 1.621575  |
| H  | -4.869574 | 1.684324  | 0.302400  |
| H  | -3.068475 | 0.248283  | 0.992915  |
| Cu | -0.247857 | 0.317469  | -0.206759 |
| H  | 0.521653  | 1.840300  | 3.373475  |
| H  | 1.160056  | 2.319091  | 1.796401  |
| H  | -0.888352 | 0.058147  | 2.290572  |
| H  | -7.002625 | -4.192437 | -0.855623 |
| H  | -6.386391 | -2.889050 | 0.207925  |
| H  | -5.777194 | -4.560796 | 0.394051  |
| C  | -2.743316 | -5.425268 | -0.674310 |
| H  | -2.366783 | -6.150048 | 0.061922  |
| H  | -1.967392 | -5.258929 | -1.439643 |
| H  | -3.629634 | -5.858306 | -1.169525 |
| H  | 3.717639  | -0.416650 | -3.672850 |
| C  | 3.584765  | 0.323548  | -2.884641 |
| H  | 1.465827  | 0.278273  | -3.113183 |
| C  | 4.709753  | 0.852179  | -2.197999 |
| C  | 2.298648  | 0.722296  | -2.561896 |
| C  | 4.455995  | 1.802098  | -1.178662 |
| C  | 2.048369  | 1.660130  | -1.544598 |
| H  | 5.277064  | 2.238732  | -0.611743 |
| C  | 3.160035  | 2.177506  | -0.863762 |
| C  | 0.700412  | 2.111675  | -1.176549 |
| H  | 3.003280  | 2.899093  | -0.058296 |
| H  | 0.654598  | 2.813526  | -0.337129 |
| H  | -1.394202 | 2.308514  | -1.519091 |
| C  | -0.460875 | 1.832033  | -1.833517 |
| H  | -0.475448 | 1.287997  | -2.780504 |
| H  | -5.502598 | 6.290938  | -0.330411 |
| H  | -6.750736 | 4.609566  | -0.583144 |
| H  | -4.228733 | 6.276982  | 0.901345  |
| C  | -4.570716 | 5.796097  | -0.030530 |
| H  | -6.504917 | 3.129279  | 0.357850  |
| C  | -6.031490 | 3.809250  | -0.369380 |
| N  | -4.815686 | 4.385896  | 0.154333  |
| H  | -3.812131 | 5.999995  | -0.810831 |
| H  | -5.868284 | 3.239877  | -1.304633 |
| H  | 8.019452  | 0.452207  | -2.060277 |
| H  | 7.282261  | -0.720308 | -3.631005 |
| H  | 7.222928  | 2.017529  | -1.795952 |
| C  | 7.095671  | 0.924813  | -1.707012 |
| H  | 5.821744  | -0.213123 | -4.501364 |
| C  | 6.205378  | -0.547019 | -3.522330 |
| N  | 5.981200  | 0.442628  | -2.492138 |
| H  | 6.981017  | 0.684327  | -0.635252 |
| H  | 5.729297  | -1.515123 | -3.284178 |

91

Figure 4 para-NMe<sub>2</sub>ts(AS)<sub>02</sub> / electronic energy: -3776.41562681 a.u. / lowest freq: -278.62 cm<sup>-1</sup>

|   |           |           |           |
|---|-----------|-----------|-----------|
| C | 0.476224  | -1.314942 | -0.767141 |
| C | 0.073041  | -1.759053 | 0.528738  |
| C | 0.967640  | -1.760253 | 1.596070  |
| O | 2.114392  | -3.524065 | 1.574401  |
| P | 3.156732  | -3.413495 | 0.465130  |
| O | 3.596279  | -2.073736 | -0.041211 |
| O | 4.418425  | -4.303554 | 0.996919  |
| O | 2.647372  | -4.269244 | -0.834037 |
| C | 5.584763  | -4.358713 | 0.205243  |
| H | -0.207567 | -1.417359 | -1.614251 |
| H | 1.542597  | -1.362846 | -1.008157 |
| H | -0.942920 | -2.133217 | 0.689439  |
| H | 1.920310  | -1.235632 | 1.508762  |
| H | 0.623366  | -2.001738 | 2.601338  |
| B | -1.526938 | 1.233101  | -2.354799 |
| O | -2.763148 | 1.321047  | -1.774134 |
| O | -1.447420 | 0.202364  | -3.253545 |
| C | -3.513684 | 0.145327  | -2.138661 |
| C | -2.771696 | -0.330744 | -3.443818 |
| C | -4.972156 | 0.526100  | -2.332373 |
| C | -3.385159 | -0.845378 | -0.984865 |
| C | -3.332811 | 0.299925  | -4.716611 |
| C | -2.679158 | -1.839374 | -3.607354 |
| H | -3.417024 | 1.392912  | -4.622957 |
| H | -4.323605 | -0.106910 | -4.964558 |
| H | -2.653018 | 0.083764  | -5.553861 |
| H | -2.153858 | -2.313448 | -2.767931 |
| H | -2.129952 | -2.079817 | -4.529597 |
| H | -3.683110 | -2.283164 | -3.685719 |
| H | -2.336546 | -1.126167 | -0.818665 |
| H | -3.965843 | -1.760521 | -1.167856 |
| H | -3.759031 | -0.375092 | -0.065847 |
| H | -5.552596 | -0.337008 | -2.691454 |
| H | -5.090191 | 1.350437  | -3.047630 |
| H | -5.398869 | 0.846546  | -1.370137 |
| C | 3.202006  | 1.274048  | -0.597295 |
| C | 4.338947  | 1.875576  | -0.075133 |
| C | 2.053485  | 2.012042  | -0.946359 |

|    |           |           |           |
|----|-----------|-----------|-----------|
| C  | 4.404602  | 3.275110  | 0.129695  |
| C  | 2.125412  | 3.398117  | -0.747994 |
| C  | 3.260222  | 4.020116  | -0.229231 |
| C  | 0.832948  | 1.314024  | -1.450073 |
| C  | -0.314449 | 2.162073  | -1.994075 |
| H  | 3.246302  | 5.103594  | -0.107371 |
| H  | 1.270171  | 4.027656  | -1.005840 |
| H  | 5.186078  | 1.237924  | 0.179231  |
| H  | 3.209137  | 0.183089  | -0.701683 |
| Cu | 0.213794  | 0.367419  | 0.230297  |
| H  | 0.016732  | 2.715098  | -2.896443 |
| H  | -0.647881 | 2.922034  | -1.269686 |
| H  | 1.123080  | 0.573686  | -2.204932 |
| H  | 6.309849  | -5.005574 | 0.719323  |
| H  | 6.029813  | -3.359150 | 0.071560  |
| H  | 5.381530  | -4.784806 | -0.792503 |
| C  | 2.097218  | -5.552279 | -0.643537 |
| H  | 1.698989  | -5.898693 | -1.608177 |
| H  | 1.280969  | -5.532590 | 0.096628  |
| H  | 2.858660  | -6.273985 | -0.299242 |
| H  | -5.031453 | 2.251117  | 1.355225  |
| C  | -4.356136 | 1.504806  | 1.771775  |
| H  | -2.649917 | 2.685575  | 1.283354  |
| C  | -4.869905 | 0.308570  | 2.335383  |
| C  | -2.993672 | 1.750101  | 1.729702  |
| C  | -3.929447 | -0.611067 | 2.865510  |
| C  | -2.063391 | 0.840212  | 2.257580  |
| H  | -4.261808 | -1.545549 | 3.315785  |
| C  | -2.571121 | -0.338908 | 2.825477  |
| C  | -0.614220 | 1.085400  | 2.260055  |
| H  | -1.874774 | -1.070360 | 3.246015  |
| H  | -0.039517 | 0.476564  | 2.965750  |
| H  | 1.109884  | 2.243578  | 1.777194  |
| C  | 0.052912  | 2.056567  | 1.571009  |
| H  | -0.467556 | 2.799428  | 0.960539  |
| H  | 6.542003  | 5.602857  | 1.227253  |
| H  | 7.473040  | 3.727270  | 1.384257  |
| H  | 5.453344  | 5.839129  | -0.158245 |
| C  | 5.572930  | 5.310131  | 0.805272  |
| H  | 7.105305  | 2.565412  | 0.088998  |
| C  | 6.688503  | 3.079403  | 0.974514  |
| N  | 5.528849  | 3.876372  | 0.653122  |
| H  | 4.788010  | 5.681345  | 1.488799  |
| H  | 6.464863  | 2.307991  | 1.732755  |
| H  | -8.165687 | 0.622934  | 1.914875  |
| H  | -7.797876 | -1.204650 | 2.860408  |
| H  | -7.099024 | 1.981189  | 2.336561  |
| C  | -7.145644 | 1.010997  | 1.812008  |
| H  | -6.450129 | -1.255032 | 4.017556  |
| C  | -6.705594 | -1.174907 | 2.946441  |
| N  | -6.212403 | 0.051245  | 2.359446  |
| H  | -6.963769 | 1.197467  | 0.739260  |
| H  | -6.304826 | -2.067494 | 2.435461  |

91

Figure 4\_para-NMe2\_ts(AS)\_03 / electronic energy: -3776.42214536 a.u. / lowest freq: -265.50 cm-1

|   |           |           |           |
|---|-----------|-----------|-----------|
| C | -1.710847 | -1.464956 | -1.002066 |
| C | -1.408677 | -2.157776 | 0.208212  |
| C | -0.112651 | -2.205202 | 0.706091  |
| O | 0.955541  | -3.766410 | -0.289737 |
| P | 1.866901  | -3.050169 | -1.280109 |
| O | 1.340292  | -2.009323 | -2.217965 |
| O | 3.066846  | -2.433177 | -0.343235 |
| O | 2.654718  | -4.169140 | -2.169138 |
| C | 3.954330  | -1.479558 | -0.878060 |
| H | -2.726204 | -1.511360 | -1.403600 |
| H | -0.900860 | -1.374569 | -1.734053 |
| H | -2.200431 | -2.688463 | 0.746284  |
| H | 0.647318  | -1.519002 | 0.332080  |
| H | 0.093206  | -2.666373 | 1.671002  |
| B | -4.267295 | 1.196461  | -0.487168 |
| O | -4.909836 | 1.325989  | 0.717961  |
| O | -4.704677 | 0.108073  | -1.193177 |
| C | -5.618706 | 0.097044  | 0.967409  |
| C | -5.814635 | -0.475639 | -0.485922 |
| C | -6.907707 | 0.395736  | 1.713507  |
| C | -4.695082 | -0.765999 | 1.825410  |
| C | -7.091120 | 0.021309  | -1.160085 |
| C | -5.722627 | -1.989717 | -0.586548 |
| H | -7.186256 | 1.115006  | -1.088659 |
| H | -7.987326 | -0.437201 | -0.718220 |
| H | -7.059089 | -0.245760 | -2.226543 |
| H | -4.748904 | -2.364227 | -0.243512 |
| H | -5.857019 | -2.301903 | -1.632638 |
| H | -6.511584 | -2.466990 | 0.014089  |
| H | -3.738415 | -0.940788 | 1.308865  |
| H | -5.146727 | -1.736973 | 2.071962  |
| H | -4.478751 | -0.241246 | 2.767840  |
| H | -7.497002 | -0.524054 | 1.846079  |
| H | -7.523651 | 1.133778  | 1.183760  |
| H | -6.677521 | 0.798891  | 2.710670  |
| C | 0.573855  | 1.222011  | -1.906429 |
| C | 1.843157  | 1.774849  | -1.969521 |
| C | -0.531983 | 1.930263  | -1.394386 |
| C | 2.103811  | 3.078833  | -1.491411 |
| C | -0.284140 | 3.253801  | -1.000361 |
| C | 0.989966  | 3.821560  | -1.048934 |
| C | -1.859680 | 1.257944  | -1.260450 |

|    |           |           |           |
|----|-----------|-----------|-----------|
| C  | -3.083176 | 2.119026  | -0.944995 |
| H  | 1.108023  | 4.854425  | -0.720663 |
| H  | -1.105400 | 3.876349  | -0.637625 |
| H  | 2.647733  | 1.159806  | -2.371054 |
| H  | 0.470307  | 0.182205  | -2.229307 |
| Cu | -1.472909 | 0.001674  | 0.297287  |
| H  | -3.365231 | 2.717863  | -1.833750 |
| H  | -2.883637 | 2.839271  | -0.137064 |
| H  | -2.061753 | 0.660707  | -2.156713 |
| H  | 4.779903  | -1.353853 | -0.163051 |
| H  | 3.458990  | -0.505498 | -1.019144 |
| H  | 4.376629  | -1.802170 | -1.845551 |
| C  | 3.249976  | -5.272581 | -1.524831 |
| H  | 3.738143  | -5.889065 | -2.293211 |
| H  | 2.500756  | -5.885680 | -0.997904 |
| H  | 4.012165  | -4.950844 | -0.794577 |
| H  | 3.369015  | 2.015038  | 0.861237  |
| C  | 2.862502  | 1.298907  | 1.508903  |
| H  | 0.970298  | 2.143594  | 1.035345  |
| C  | 3.593190  | 0.296469  | 2.195041  |
| C  | 1.484048  | 1.371474  | 1.610610  |
| C  | 2.854514  | -0.598966 | 3.008118  |
| C  | 0.748751  | 0.468821  | 2.395468  |
| H  | 3.360496  | -1.387676 | 3.563547  |
| C  | 1.474464  | -0.507639 | 3.094550  |
| C  | -0.719507 | 0.474555  | 2.452680  |
| H  | 0.937860  | -1.230335 | 3.716232  |
| H  | -1.167552 | -0.325429 | 3.053557  |
| H  | -1.160785 | 2.329660  | 1.460971  |
| C  | -1.551936 | 1.418370  | 1.920727  |
| H  | -2.625381 | 1.392075  | 2.126813  |
| H  | 3.147870  | 5.188888  | -0.097613 |
| H  | 4.679270  | 5.155054  | -0.984950 |
| C  | 3.602640  | 4.961172  | -1.074653 |
| H  | 3.187809  | 5.671819  | -1.816188 |
| H  | 4.549549  | 1.847406  | -1.807068 |
| N  | 3.394370  | 3.578239  | -1.433652 |
| H  | 5.404467  | 3.390835  | -1.950413 |
| C  | 4.447422  | 2.890796  | -2.145930 |
| H  | 4.286789  | 2.872888  | -3.241267 |
| H  | 5.556251  | 2.180112  | 1.626372  |
| H  | 6.741152  | 0.903706  | 1.266756  |
| C  | 5.672458  | 1.147589  | 1.252444  |
| H  | 5.338151  | 1.132210  | 0.200665  |
| H  | 5.566032  | -0.793555 | 3.841031  |
| N  | 4.950814  | 0.193670  | 2.064373  |
| H  | 6.732155  | -0.796715 | 2.500522  |
| C  | 5.665236  | -0.864047 | 2.743443  |
| H  | 5.310022  | -1.862334 | 2.433899  |

91

Figure 4\_para-NMe2\_ts(AS)\_04 / electronic energy: -3776.41714465 a.u. / lowest freq: -193.45 cm<sup>-1</sup>

|   |           |           |           |
|---|-----------|-----------|-----------|
| C | -1.123253 | 1.674619  | 0.892002  |
| C | -0.806745 | 2.469511  | -0.246917 |
| C | 0.409798  | 2.360780  | -0.900030 |
| O | 1.772165  | 3.863565  | -0.141894 |
| P | 3.013888  | 3.268779  | 0.502224  |
| O | 2.962421  | 2.453459  | 1.752820  |
| O | 3.728781  | 2.410766  | -0.711810 |
| O | 4.095185  | 4.473168  | 0.745567  |
| C | 4.895115  | 1.680174  | -0.416887 |
| H | -2.044954 | 1.888767  | 1.437947  |
| H | -0.311242 | 1.235043  | 1.482650  |
| H | -1.549236 | 3.176015  | -0.631382 |
| H | 1.126718  | 1.590487  | -0.612894 |
| H | 0.568426  | 2.843504  | -1.862261 |
| B | -0.482394 | -1.398412 | 2.258449  |
| O | 0.497212  | -0.499244 | 2.584824  |
| O | 0.015135  | -2.658983 | 2.064196  |
| C | 1.772545  | -1.131922 | 2.349085  |
| C | 1.400146  | -2.651292 | 2.475443  |
| C | 2.780529  | -0.612554 | 3.359719  |
| C | 2.209230  | -0.744337 | 0.939532  |
| C | 1.444827  | -3.158832 | 3.914794  |
| C | 2.196364  | -3.568813 | 1.563900  |
| H | 0.893265  | -2.492072 | 4.594347  |
| H | 2.478774  | -3.247817 | 4.278087  |
| H | 0.976917  | -4.153194 | 3.962031  |
| H | 2.020411  | -3.326248 | 0.508877  |
| H | 1.902773  | -4.616321 | 1.729295  |
| H | 3.273765  | -3.480022 | 1.769660  |
| H | 1.472638  | -1.066806 | 0.188080  |
| H | 3.175453  | -1.201015 | 0.682185  |
| H | 2.326877  | 0.347967  | 0.901304  |
| H | 3.734116  | -1.154756 | 3.265099  |
| H | 2.417465  | -0.718971 | 4.390857  |
| H | 2.966423  | 0.452488  | 3.154180  |
| C | -4.567420 | -1.080012 | -0.669333 |
| C | -5.892016 | -0.753669 | -0.937805 |
| C | -3.839694 | -0.499853 | 0.383602  |
| C | -6.585370 | 0.195142  | -0.151610 |
| C | -4.546320 | 0.417190  | 1.179793  |
| C | -5.872109 | 0.758070  | 0.931486  |
| C | -2.406555 | -0.846657 | 0.623433  |
| C | -1.994539 | -1.004549 | 2.090577  |
| H | -6.353836 | 1.473520  | 1.598137  |
| H | -4.050685 | 0.885254  | 2.034475  |
| H | -6.391264 | -1.254948 | -1.767227 |



|    |           |           |           |
|----|-----------|-----------|-----------|
| H  | -4.083017 | -1.829687 | -1.301397 |
| Cu | -1.394635 | 0.406927  | -0.591619 |
| H  | -2.630849 | -1.781439 | 2.556650  |
| H  | -2.173390 | -0.079267 | 2.660573  |
| H  | -2.161144 | -1.774598 | 0.080351  |
| H  | 5.340734  | 1.349742  | -1.366833 |
| H  | 4.678050  | 0.796700  | 0.206039  |
| H  | 5.641311  | 2.298002  | 0.111994  |
| C  | 4.295681  | 5.436424  | -0.261902 |
| H  | 5.034003  | 6.163571  | 0.106511  |
| H  | 3.361266  | 5.968294  | -0.504329 |
| H  | 4.686193  | 4.981395  | -1.189074 |
| H  | 1.775988  | -3.991462 | -1.888017 |
| C  | 1.847450  | -2.921114 | -2.075727 |
| H  | -0.263758 | -2.760316 | -2.293682 |
| C  | 3.106804  | -2.267997 | -2.050532 |
| C  | 0.682029  | -2.213614 | -2.309324 |
| C  | 3.124694  | -0.889274 | -2.374184 |
| C  | 0.695459  | -0.832123 | -2.572473 |
| H  | 4.065086  | -0.343077 | -2.410593 |
| C  | 1.949374  | -0.201953 | -2.625310 |
| C  | -0.527144 | -0.049802 | -2.769387 |
| H  | 2.010674  | 0.866333  | -2.846785 |
| H  | -0.383275 | 0.957998  | -3.171938 |
| H  | -2.025762 | -1.517423 | -2.304728 |
| C  | -1.803470 | -0.478892 | -2.559216 |
| H  | -2.649496 | 0.152460  | -2.846713 |
| H  | 5.497161  | -1.336772 | -1.118492 |
| H  | 6.297472  | -2.906341 | -1.324433 |
| C  | 5.522490  | -2.248782 | -1.735987 |
| H  | 5.826532  | -1.959531 | -2.758838 |
| H  | 3.517933  | -4.694841 | -0.780280 |
| N  | 4.249532  | -2.936732 | -1.709245 |
| H  | 5.225350  | -4.720195 | -1.250190 |
| C  | 4.230648  | -4.376373 | -1.557070 |
| H  | 3.966205  | -4.894144 | -2.496677 |
| H  | -8.109280 | 2.387529  | 0.600754  |
| H  | -9.612317 | 1.597206  | 0.092365  |
| C  | -8.606362 | 1.409171  | 0.487071  |
| H  | -8.715676 | 0.969122  | 1.496535  |
| H  | -8.109945 | -0.027767 | -2.447454 |
| N  | -7.890631 | 0.546637  | -0.422850 |
| H  | -9.612029 | 0.306277  | -1.570060 |
| C  | -8.612371 | -0.134364 | -1.470888 |
| H  | -8.737126 | -1.216135 | -1.273435 |

91

Figure 4 para-NMe2\_pi-allyl\_01 / electronic energy: -3776.42561792 a.u. / lowest freq: 19.65 cm<sup>-1</sup>

|    |           |           |           |
|----|-----------|-----------|-----------|
| C  | 0.275898  | 1.464053  | 0.193334  |
| C  | -0.211004 | 1.680924  | -1.153069 |
| C  | 0.595222  | 1.506597  | -2.237910 |
| O  | 3.202992  | 3.516694  | -2.359087 |
| P  | 3.483172  | 3.197718  | -0.925377 |
| O  | 3.385168  | 1.798675  | -0.372235 |
| O  | 4.967941  | 3.823185  | -0.575972 |
| O  | 2.523176  | 4.111313  | 0.066559  |
| C  | 5.496360  | 3.627389  | 0.710258  |
| H  | -0.406401 | 1.644485  | 1.025470  |
| H  | 1.337320  | 1.688203  | 0.364848  |
| H  | -1.285999 | 1.835848  | -1.304666 |
| H  | 1.679025  | 1.403528  | -2.115922 |
| H  | 0.194253  | 1.580063  | -3.251533 |
| B  | -1.824004 | -0.525274 | 2.126868  |
| O  | -3.150032 | -0.734353 | 1.873528  |
| O  | -1.590784 | 0.676701  | 2.737323  |
| C  | -3.849866 | 0.504014  | 2.121015  |
| C  | -2.860231 | 1.263334  | 3.083196  |
| C  | -5.210529 | 0.200002  | 2.725716  |
| C  | -4.023895 | 1.193932  | 0.769773  |
| C  | -3.103313 | 0.961571  | 4.559961  |
| C  | -2.783070 | 2.764910  | 2.860243  |
| H  | -3.161077 | -0.121041 | 4.747239  |
| H  | -4.030661 | 1.428907  | 4.920571  |
| H  | -2.265698 | 1.362628  | 5.148990  |
| H  | -2.462278 | 3.010192  | 1.839238  |
| H  | -2.057504 | 3.206110  | 3.559283  |
| H  | -3.761141 | 3.235283  | 3.041602  |
| H  | -3.053872 | 1.371790  | 0.280793  |
| H  | -4.545890 | 2.155795  | 0.871843  |
| H  | -4.623811 | 0.551049  | 0.111320  |
| H  | -5.726784 | 1.132537  | 2.998858  |
| H  | -5.131470 | -0.431454 | 3.619852  |
| H  | -5.834287 | -0.328846 | 1.990109  |
| C  | 3.053097  | -1.119152 | 0.767843  |
| C  | 4.188968  | -1.875162 | 0.520112  |
| C  | 1.821596  | -1.716930 | 1.101945  |
| C  | 4.168547  | -3.289569 | 0.606629  |
| C  | 1.799183  | -3.118449 | 1.178813  |
| C  | 2.931589  | -3.889295 | 0.943592  |
| C  | 0.616914  | -0.871694 | 1.332143  |
| C  | -0.669206 | -1.538414 | 1.791602  |
| H  | 2.847453  | -4.972441 | 1.030585  |
| H  | 0.871159  | -3.635518 | 1.433177  |
| H  | 5.105623  | -1.351003 | 0.249113  |
| H  | 3.121895  | -0.032358 | 0.638669  |
| Cu | 0.361617  | -0.345726 | -0.604400 |
| H  | -0.460776 | -2.086071 | 2.734827  |
| H  | -1.024476 | -2.303234 | 1.083081  |

|   |           |           |           |
|---|-----------|-----------|-----------|
| H | 0.866761  | -0.018739 | 1.969457  |
| H | 6.450013  | 4.173008  | 0.776836  |
| H | 5.685309  | 2.560110  | 0.917725  |
| H | 4.820430  | 4.013191  | 1.494475  |
| C | 2.348645  | 5.469774  | -0.239703 |
| H | 1.638257  | 5.897599  | 0.484472  |
| H | 1.946438  | 5.609690  | -1.257519 |
| H | 3.297644  | 6.031600  | -0.167403 |
| H | -4.521988 | -2.645350 | -0.723444 |
| C | -3.965835 | -1.986020 | -1.387652 |
| H | -2.150456 | -3.034783 | -1.011085 |
| C | -4.618599 | -0.915603 | -2.050255 |
| C | -2.609895 | -2.201465 | -1.548167 |
| C | -3.838226 | -0.124735 | -2.930002 |
| C | -1.825762 | -1.388521 | -2.384343 |
| H | -4.292564 | 0.692385  | -3.488988 |
| C | -2.481767 | -0.364073 | -3.084224 |
| C | -0.372885 | -1.546875 | -2.511579 |
| H | -1.904181 | 0.276738  | -3.756280 |
| H | 0.090732  | -1.020285 | -3.351949 |
| H | 1.490347  | -2.415713 | -1.937631 |
| C | 0.427832  | -2.298301 | -1.708094 |
| H | 0.017501  | -2.942704 | -0.926966 |
| H | 6.208574  | -5.904543 | 0.199411  |
| H | 7.308139  | -4.151451 | -0.143518 |
| H | 4.891532  | -5.857194 | 1.387549  |
| C | 5.216902  | -5.482381 | 0.401423  |
| H | 6.870969  | -2.673310 | 0.736905  |
| C | 6.523978  | -3.394414 | -0.022940 |
| N | 5.292621  | -4.040729 | 0.369333  |
| H | 4.518770  | -5.882881 | -0.356559 |
| H | 6.427195  | -2.852455 | -0.981284 |
| H | -7.726150 | -1.073810 | -0.844491 |
| H | -7.623353 | 0.529271  | -2.188342 |
| H | -6.830508 | -2.521005 | -1.366502 |
| C | -6.722549 | -1.499029 | -0.961054 |
| H | -6.611403 | 0.266089  | -3.627880 |
| C | -6.588145 | 0.436603  | -2.536869 |
| N | -5.939968 | -0.643929 | -1.826751 |
| H | -6.275749 | -1.578824 | 0.043878  |
| H | -6.087312 | 1.402316  | -2.353741 |

91

Figure 4 para-NMe2\_pi-allyl\_02 / electronic energy: -3776.43298427 a.u. / lowest freq: 24.82 cm<sup>-1</sup>

|    |           |           |           |
|----|-----------|-----------|-----------|
| C  | -1.845792 | -1.634381 | -0.752155 |
| C  | -1.773057 | -2.092163 | 0.614921  |
| C  | -0.608153 | -2.020612 | 1.322910  |
| O  | 1.011214  | -4.607009 | -0.418548 |
| P  | 1.702478  | -3.446427 | -1.056022 |
| O  | 0.976968  | -2.366839 | -1.816776 |
| O  | 2.617348  | -2.741177 | 0.133650  |
| O  | 2.893400  | -3.964585 | -2.076477 |
| C  | 3.379622  | -1.605382 | -0.186991 |
| H  | -2.819300 | -1.657173 | -1.245919 |
| H  | -0.952990 | -1.832715 | -1.366555 |
| H  | -2.698948 | -2.343923 | 1.144008  |
| H  | 0.348238  | -1.824534 | 0.825764  |
| H  | -0.580110 | -2.267091 | 2.386494  |
| B  | -4.197969 | 1.058653  | -0.673050 |
| O  | -4.796944 | 1.493627  | 0.477672  |
| O  | -4.735526 | -0.106827 | -1.137171 |
| C  | -5.662350 | 0.446261  | 0.958287  |
| C  | -5.889457 | -0.429418 | -0.335901 |
| C  | -6.926110 | 1.064709  | 1.533694  |
| C  | -4.890784 | -0.282285 | 2.056116  |
| C  | -7.118044 | -0.013332 | -1.140644 |
| C  | -5.908716 | -1.929404 | -0.089050 |
| H  | -7.120796 | 1.067799  | -1.344125 |
| H  | -8.050327 | -0.274356 | -0.620064 |
| H  | -7.105885 | -0.539394 | -2.106309 |
| H  | -4.966938 | -2.284334 | 0.349963  |
| H  | -6.057536 | -2.459211 | -1.041232 |
| H  | -6.734070 | -2.202335 | 0.585271  |
| H  | -3.948029 | -0.694258 | 1.669068  |
| H  | -5.476869 | -1.102287 | 2.493946  |
| H  | -4.645757 | 0.429689  | 2.858001  |
| H  | -7.635848 | 0.280872  | 1.837362  |
| H  | -7.422332 | 1.726683  | 0.812448  |
| H  | -6.676390 | 1.659583  | 2.424712  |
| C  | 0.697105  | 0.749350  | -1.982952 |
| C  | 1.967722  | 1.289787  | -2.100654 |
| C  | -0.424361 | 1.543337  | -1.669319 |
| C  | 2.209978  | 2.665777  | -1.885687 |
| C  | -0.192102 | 2.921551  | -1.522768 |
| C  | 1.078365  | 3.476301  | -1.636674 |
| C  | -1.763776 | 0.912489  | -1.503971 |
| C  | -2.983276 | 1.805988  | -1.332760 |
| H  | 1.184686  | 4.553861  | -1.513736 |
| H  | -1.024560 | 3.598531  | -1.319115 |
| H  | 2.787520  | 0.611559  | -2.333482 |
| H  | 0.604600  | -0.336951 | -2.096300 |
| Cu | -1.366939 | 0.003349  | 0.275164  |
| H  | -3.281023 | 2.193161  | -2.326383 |
| H  | -2.759541 | 2.684403  | -0.710655 |
| H  | -1.936255 | 0.170033  | -2.287083 |
| H  | 4.168238  | -1.492883 | 0.573087  |
| H  | 2.768541  | -0.687730 | -0.190259 |
| H  | 3.868643  | -1.703034 | -1.172398 |

|   |           |           |           |
|---|-----------|-----------|-----------|
| C | 3.756758  | -4.976874 | -1.630174 |
| H | 4.306713  | -5.373220 | -2.497489 |
| H | 3.200533  | -5.802768 | -1.155413 |
| H | 4.493013  | -4.596091 | -0.898147 |
| H | 3.520737  | 2.311201  | 0.770368  |
| C | 2.981735  | 1.667688  | 1.466030  |
| H | 1.114421  | 2.446244  | 0.813635  |
| C | 3.678506  | 0.748462  | 2.292819  |
| C | 1.601008  | 1.739865  | 1.488836  |
| C | 2.900415  | -0.073863 | 3.146170  |
| C | 0.828576  | 0.914348  | 2.322839  |
| H | 3.377944  | -0.801309 | 3.801227  |
| C | 1.518434  | 0.013125  | 3.148896  |
| C | -0.635866 | 0.936958  | 2.331561  |
| H | 0.951366  | -0.648850 | 3.809394  |
| H | -1.107220 | 0.267283  | 3.059481  |
| H | -1.046184 | 2.540840  | 0.962883  |
| C | -1.450399 | 1.746747  | 1.594008  |
| H | -2.528609 | 1.760151  | 1.777482  |
| H | 3.220601  | 5.012373  | -0.876933 |
| H | 4.758609  | 4.822547  | -1.736859 |
| C | 3.684182  | 4.607832  | -1.791030 |
| H | 3.268371  | 5.158965  | -2.655740 |
| H | 4.648983  | 1.415911  | -1.801017 |
| N | 3.487903  | 3.179936  | -1.890943 |
| H | 5.528218  | 2.897460  | -2.213430 |
| C | 4.582655  | 2.361258  | -2.362365 |
| H | 4.495325  | 2.109295  | -3.436200 |
| H | 5.628878  | 2.538436  | 1.510051  |
| H | 6.870401  | 1.270455  | 1.478378  |
| C | 5.801211  | 1.463401  | 1.333635  |
| H | 5.555581  | 1.249044  | 0.278660  |
| H | 5.551748  | -0.206050 | 4.123084  |
| N | 5.039058  | 0.641418  | 2.247613  |
| H | 6.793261  | -0.304208 | 2.855982  |
| C | 5.714713  | -0.360775 | 3.042826  |
| H | 5.381412  | -1.383150 | 2.791709  |

31

Figure 4 para-H<sub>L</sub>-Cu-OtBu / electronic energy: -2182.55158904 a.u. / lowest freq: 27.42 cm<sup>-1</sup>

|    |           |           |           |
|----|-----------|-----------|-----------|
| C  | -1.928903 | 0.522589  | 0.151598  |
| C  | -2.367593 | -0.225683 | 1.253706  |
| C  | -2.102115 | -0.011349 | -1.135516 |
| C  | -2.688512 | -1.261082 | -1.309804 |
| C  | -3.114996 | -1.999957 | -0.203840 |
| C  | -2.955887 | -1.476382 | 1.078595  |
| H  | -1.771969 | 0.551062  | -2.011760 |
| H  | -2.813794 | -1.663778 | -2.317510 |
| H  | -3.574222 | -2.981095 | -0.344130 |
| H  | -3.288621 | -2.045895 | 1.949330  |
| H  | -2.235906 | 0.177972  | 2.261012  |
| C  | -1.259656 | 1.821554  | 0.396510  |
| C  | -0.717088 | 2.656046  | -0.552234 |
| H  | -1.320811 | 2.184359  | 1.429681  |
| H  | -0.795346 | 2.453802  | -1.625268 |
| H  | -0.394506 | 3.662142  | -0.268341 |
| H  | 4.530550  | -0.752582 | -0.259174 |
| H  | 4.027421  | -1.250156 | 1.372998  |
| C  | 3.815244  | -1.377041 | 0.299445  |
| O  | 2.253156  | 0.399694  | 0.393393  |
| H  | 3.992832  | -2.431959 | 0.032888  |
| C  | 2.377225  | -0.924049 | -0.002265 |
| H  | 2.762220  | -0.403423 | -2.080931 |
| H  | 1.541412  | -1.679023 | 1.858641  |
| C  | 2.104007  | -1.077496 | -1.509356 |
| C  | 1.391935  | -1.816035 | 0.775636  |
| H  | 2.263369  | -2.107308 | -1.870669 |
| H  | 1.509123  | -2.887576 | 0.542110  |
| H  | 1.058778  | -0.800471 | -1.732575 |
| H  | 0.351559  | -1.530222 | 0.541548  |
| Cu | 0.717611  | 1.355859  | 0.135178  |

73

Figure 4 para-H<sub>ed</sub> / electronic energy: -3004.31675967 a.u. / lowest freq: 18.65 cm<sup>-1</sup>

|    |           |           |           |
|----|-----------|-----------|-----------|
| H  | 3.619191  | -2.264669 | -1.749936 |
| H  | 4.266501  | -1.175749 | -0.505774 |
| O  | 1.949337  | -0.170082 | -1.609307 |
| C  | 4.111933  | -1.294478 | -1.586572 |
| H  | 5.098836  | -1.319410 | -2.074826 |
| C  | 3.259546  | -0.155654 | -2.153842 |
| H  | 2.578672  | -1.323182 | -3.854781 |
| H  | 4.092980  | 1.357629  | -0.822653 |
| C  | 3.068593  | -0.356994 | -3.657714 |
| C  | 3.930529  | 1.197632  | -1.896566 |
| H  | 2.429252  | 0.439557  | -4.067961 |
| H  | 4.032070  | -0.340764 | -4.189999 |
| H  | 3.287115  | 2.011562  | -2.264231 |
| H  | 4.899863  | 1.258362  | -2.416090 |
| Cu | -0.160418 | -1.427890 | -0.362048 |
| H  | -0.411425 | 3.489115  | 2.064807  |
| H  | -0.007268 | 4.717351  | -0.037120 |
| H  | 0.983004  | 3.246351  | 0.240167  |
| C  | 0.274489  | 3.735377  | -0.444532 |
| H  | -1.960254 | 4.254603  | 1.616556  |
| H  | 0.792081  | 3.895542  | -1.402045 |
| C  | -1.464625 | 3.293986  | 1.825295  |
| H  | -1.939289 | 2.855115  | 2.715937  |
| C  | -1.609640 | 2.344579  | 0.645320  |
| C  | -0.944654 | 2.845473  | -0.685761 |

|   |           |           |           |
|---|-----------|-----------|-----------|
| O | -0.869698 | 1.144563  | 0.915905  |
| H | -2.363477 | 4.400287  | -1.216594 |
| B | -0.261796 | 0.708405  | -0.252137 |
| H | -1.352053 | 3.825117  | -2.564025 |
| C | -1.900826 | 3.507594  | -1.664783 |
| O | -0.453083 | 1.623046  | -1.261128 |
| H | -3.720451 | 2.814612  | 0.302784  |
| C | -3.072589 | 1.942536  | 0.474264  |
| H | -3.413052 | 1.436418  | 1.389023  |
| H | -2.697637 | 2.821254  | -1.980626 |
| H | -3.196720 | 1.240754  | -0.362796 |
| H | 3.863313  | -2.185662 | 1.867486  |
| H | 4.511960  | -0.154138 | 1.280872  |
| H | 2.478421  | -3.191367 | 2.340032  |
| C | 2.917343  | -2.185591 | 2.423964  |
| O | 1.769845  | -1.417455 | 0.478043  |
| H | 4.332384  | 0.096385  | 3.037314  |
| C | 3.991648  | 0.435628  | 2.047753  |
| H | 3.133605  | -1.997570 | 3.486385  |
| B | 1.610529  | -0.135498 | -0.242723 |
| H | 4.295027  | 1.486059  | 1.925271  |
| C | 1.935704  | -1.157563 | 1.873593  |
| C | 2.471126  | 0.341396  | 1.900857  |
| O | 2.137628  | 0.863859  | 0.623254  |
| H | 0.223867  | -2.360932 | 2.391686  |
| C | 0.586647  | -1.337631 | 2.577852  |
| H | 0.680646  | -1.213786 | 3.666458  |
| H | -0.163776 | -0.620148 | 2.217851  |
| H | 1.996609  | 0.796453  | 3.982743  |
| C | 1.815564  | 1.204764  | 2.976558  |
| H | 2.245120  | 2.217650  | 2.941658  |
| H | 0.735250  | 1.289146  | 2.807762  |
| H | -1.679063 | -2.140085 | -2.282828 |
| H | -3.795277 | -1.158184 | -2.565882 |
| H | -0.234830 | -3.794901 | -1.229143 |
| C | -1.821183 | -2.352731 | -1.216690 |
| C | -4.012623 | -1.222335 | -1.496547 |
| C | -0.992472 | -3.282823 | -0.627991 |
| H | -5.942423 | -0.281258 | -1.689780 |
| C | -3.071117 | -1.806086 | -0.637709 |
| C | -5.219612 | -0.728445 | -1.003444 |
| H | -1.208932 | -3.712609 | 0.355140  |
| C | -3.358995 | -1.863327 | 0.734910  |
| C | -5.500426 | -0.803365 | 0.359634  |
| H | -2.629670 | -2.285905 | 1.430590  |
| C | -4.562943 | -1.369220 | 1.226793  |
| H | -6.443219 | -0.413157 | 0.749851  |
| H | -4.769201 | -1.419351 | 2.298430  |

73

Figure 4 para-H<sub>ts</sub>(TB) / electronic energy: -3004.31639795 a.u. / lowest freq: -60.21 cm<sup>-1</sup>

|    |           |           |           |
|----|-----------|-----------|-----------|
| H  | 3.753405  | -2.066390 | -1.981357 |
| H  | 4.355791  | -1.151636 | -0.581042 |
| O  | 2.047132  | -0.048275 | -1.582915 |
| C  | 4.226136  | -1.122048 | -1.672131 |
| H  | 5.224538  | -1.065114 | -2.132966 |
| C  | 3.368353  | 0.072327  | -2.097909 |
| H  | 2.731371  | -0.855836 | -3.955148 |
| H  | 4.145556  | 1.398779  | -0.549457 |
| C  | 3.204579  | 0.078829  | -3.617103 |
| C  | 4.007124  | 1.385977  | -1.638478 |
| H  | 2.561383  | 0.917221  | -3.924934 |
| H  | 4.176848  | 0.180201  | -4.123072 |
| H  | 3.359527  | 2.234761  | -1.905676 |
| H  | 4.986632  | 1.530516  | -2.120781 |
| Cu | -0.177828 | -1.366305 | -0.515400 |
| H  | -0.437976 | 3.287028  | 2.315428  |
| H  | 0.135878  | 4.643976  | 0.367946  |
| H  | 1.015860  | 3.084750  | 0.516224  |
| C  | 0.362919  | 3.689711  | -0.129907 |
| H  | -1.945709 | 4.150273  | 1.907863  |
| H  | 0.917571  | 3.909068  | -1.054470 |
| C  | -1.490916 | 3.155477  | 2.034653  |
| H  | -2.005004 | 2.653183  | 2.868214  |
| C  | -1.638492 | 2.329465  | 0.765945  |
| C  | -0.905397 | 2.915690  | -0.489854 |
| O  | -0.967298 | 1.073894  | 0.939435  |
| H  | -2.189523 | 4.620313  | -0.887230 |
| B  | -0.380310 | 0.697860  | -0.263629 |
| H  | -1.193441 | 4.101722  | -2.268547 |
| C  | -1.785699 | 3.741989  | -1.413795 |
| O  | -0.483546 | 1.725278  | -1.177001 |
| H  | -3.716696 | 2.931510  | 0.416390  |
| C  | -3.112323 | 2.017144  | 0.510018  |
| H  | -3.504154 | 1.429042  | 1.352547  |
| H  | -2.624723 | 3.153948  | -1.808781 |
| H  | -3.237129 | 1.416629  | -0.402478 |
| H  | 3.799730  | -2.389363 | 1.764902  |
| H  | 4.462200  | -0.303322 | 1.398672  |
| H  | 2.399983  | -3.432726 | 2.096956  |
| C  | 2.832329  | -2.437690 | 2.280884  |
| O  | 1.774267  | -1.493761 | 0.357369  |
| H  | 4.206646  | -0.216460 | 3.161747  |
| C  | 3.905939  | 0.211302  | 2.194246  |
| H  | 3.005604  | -2.338606 | 3.362891  |
| B  | 1.704522  | -0.169315 | -0.237932 |
| H  | 4.205251  | 1.269933  | 2.182383  |
| C  | 1.871092  | -1.365464 | 1.783794  |

|   |           |           |           |
|---|-----------|-----------|-----------|
| C | 2.394177  | 0.124472  | 1.975850  |
| O | 2.112417  | 0.758996  | 0.733855  |
| H | 0.141833  | -2.611209 | 2.103242  |
| C | 0.491658  | -1.610272 | 2.400485  |
| H | 0.534997  | -1.588003 | 3.499015  |
| H | -0.242874 | -0.861090 | 2.073468  |
| H | 1.814991  | 0.385514  | 4.061818  |
| C | 1.682013  | 0.885160  | 3.090197  |
| H | 2.109374  | 1.896146  | 3.173027  |
| H | 0.611183  | 0.984764  | 2.874992  |
| H | -1.694646 | -2.053582 | -2.448698 |
| H | -3.772377 | -0.994495 | -2.659564 |
| H | -0.216185 | -3.722688 | -1.473581 |
| C | -1.822442 | -2.306831 | -1.389836 |
| C | -3.995925 | -1.128691 | -1.597945 |
| C | -0.972531 | -3.242976 | -0.845049 |
| H | -5.903353 | -0.132828 | -1.730292 |
| C | -3.069135 | -1.788308 | -0.779139 |
| C | -5.193958 | -0.643867 | -1.075243 |
| H | -1.166024 | -3.706625 | 0.127402  |
| C | -3.365801 | -1.937610 | 0.584788  |
| C | -5.481553 | -0.806285 | 0.278601  |
| H | -2.649808 | -2.425363 | 1.250904  |
| C | -4.561069 | -1.453258 | 1.106443  |
| H | -6.416981 | -0.422724 | 0.692461  |
| H | -4.773833 | -1.575610 | 2.170974  |

73

Figure 4 para-H\_prod / electronic energy: -3004.33626287 a.u. / lowest freq: 26.41 cm-1

|    |           |           |           |
|----|-----------|-----------|-----------|
| H  | 5.348395  | -0.107970 | -2.225416 |
| H  | 5.117517  | 0.760311  | -0.681798 |
| O  | 2.783294  | -0.349937 | -1.549881 |
| C  | 4.912337  | 0.789933  | -1.761382 |
| H  | 5.413372  | 1.673575  | -2.184425 |
| C  | 3.410476  | 0.855386  | -2.028923 |
| H  | 3.546140  | -0.012461 | -4.014137 |
| H  | 2.976805  | 2.052510  | -0.261823 |
| C  | 3.125514  | 0.879796  | -3.526290 |
| C  | 2.768758  | 2.060409  | -1.341845 |
| H  | 2.040165  | 0.895217  | -3.707387 |
| H  | 3.568904  | 1.772352  | -3.991818 |
| H  | 1.677574  | 2.050509  | -1.483770 |
| H  | 3.169444  | 2.996342  | -1.759513 |
| Cu | -0.252587 | -0.944169 | -0.805791 |
| H  | -0.584937 | 2.826738  | 2.924124  |
| H  | 0.022704  | 4.624356  | 1.307468  |
| H  | 0.800502  | 3.029547  | 1.103381  |
| C  | 0.180907  | 3.790687  | 0.607235  |
| H  | -1.986905 | 3.924575  | 2.781423  |
| H  | 0.743991  | 4.172788  | -0.257092 |
| C  | -1.648548 | 2.884302  | 2.655934  |
| H  | -2.209778 | 2.258682  | 3.366392  |
| C  | -1.895847 | 2.395054  | 1.236341  |
| C  | -1.142570 | 3.196630  | 0.121105  |
| O  | -1.336373 | 1.084750  | 1.089372  |
| H  | -2.306789 | 5.031007  | 0.170640  |
| B  | -0.818252 | 0.924432  | -0.199879 |
| H  | -1.367380 | 4.788319  | -1.322227 |
| C  | -1.972099 | 4.276602  | -0.558279 |
| O  | -0.829235 | 2.169640  | -0.831340 |
| H  | -3.922509 | 3.230412  | 1.137455  |
| C  | -3.398861 | 2.275833  | 0.978004  |
| H  | -3.820990 | 1.529394  | 1.667479  |
| H  | -2.855591 | 3.855543  | -1.055860 |
| H  | -3.597470 | 1.930954  | -0.047466 |
| H  | 3.567732  | -3.149568 | 1.089485  |
| H  | 4.435183  | -1.754803 | 2.711103  |
| H  | 2.004209  | -3.996206 | 1.014509  |
| C  | 2.576627  | -3.231850 | 1.560056  |
| O  | 1.647699  | -1.593316 | 0.099990  |
| H  | 3.204015  | -1.446054 | 3.966869  |
| C  | 3.697252  | -1.028838 | 3.076381  |
| H  | 2.708880  | -3.575609 | 2.595570  |
| B  | 2.636468  | -0.689614 | -0.258016 |
| H  | 4.235901  | -0.119608 | 3.381228  |
| C  | 1.820025  | -1.908812 | 1.503615  |
| C  | 2.669239  | -0.681414 | 2.013357  |
| O  | 3.357559  | -0.259305 | 0.818041  |
| H  | -0.071495 | -2.917387 | 1.736709  |
| C  | 0.451781  | -2.042663 | 2.151277  |
| H  | 0.557164  | -2.197325 | 3.235469  |
| H  | -0.170338 | -1.152860 | 1.979979  |
| H  | 1.309999  | 0.278060  | 3.427347  |
| C  | 1.806258  | 0.491527  | 2.469828  |
| H  | 2.449159  | 1.373362  | 2.607235  |
| H  | 1.029835  | 0.731452  | 1.730750  |
| H  | -1.631548 | -1.522018 | -2.903178 |
| H  | -3.640445 | -0.363064 | -2.529774 |
| H  | 0.206159  | -3.016242 | -2.347001 |
| C  | -1.652194 | -2.039114 | -1.937497 |
| C  | -3.869883 | -0.965068 | -1.646248 |
| C  | -0.604890 | -2.869901 | -1.628193 |
| H  | -5.785459 | -0.029249 | -1.332053 |
| C  | -2.931515 | -1.907302 | -1.199446 |
| C  | -5.071548 | -0.772853 | -0.969779 |
| H  | -0.628845 | -3.554340 | -0.774914 |
| C  | -3.237067 | -2.662925 | -0.057625 |
| C  | -5.359504 | -1.522574 | 0.171121  |

|   |           |           |          |
|---|-----------|-----------|----------|
| H | -2.528234 | -3.406992 | 0.312675 |
| C | -4.437738 | -2.469073 | 0.621515 |
| H | -6.299968 | -1.371920 | 0.706202 |
| H | -4.656159 | -3.062817 | 1.512554 |

38

Figure 4\_para-H\_L-Cu-Bpin / electronic energy: -2360.54260251 a.u. / lowest freq: 16.87 cm-1

|    |           |           |           |
|----|-----------|-----------|-----------|
| H  | -4.091233 | 0.951489  | -2.601318 |
| H  | -4.474831 | -0.589276 | -1.804192 |
| C  | -4.312667 | 0.482689  | -1.630677 |
| H  | -2.485387 | 2.532506  | -1.628704 |
| O  | -1.994779 | 0.038800  | -1.122535 |
| H  | -5.247872 | 0.921665  | -1.249798 |
| C  | -3.165826 | 0.730417  | -0.661765 |
| C  | -2.826614 | 2.221949  | -0.629896 |
| B  | -1.265895 | -0.418220 | -0.029211 |
| H  | -3.698100 | 2.836281  | -0.358263 |
| H  | -3.843594 | -1.869068 | -0.005503 |
| H  | -2.015247 | 2.430792  | 0.083109  |
| H  | -5.268076 | -0.956097 | 0.567650  |
| C  | -4.203781 | -1.161250 | 0.755890  |
| C  | -3.366456 | 0.119280  | 0.765633  |
| O  | -2.026203 | -0.250883 | 1.123944  |
| H  | -4.116979 | -1.650997 | 1.737263  |
| H  | -4.902270 | 1.471978  | 1.496214  |
| C  | -3.916678 | 1.088154  | 1.802297  |
| H  | -3.242177 | 1.940318  | 1.958342  |
| H  | -4.038345 | 0.575203  | 2.768359  |
| Cu | 0.617594  | -1.188792 | -0.089272 |
| C  | 3.335949  | -0.334136 | 0.137067  |
| C  | 3.899437  | 0.230213  | 1.291086  |
| C  | 3.364986  | 0.407046  | -1.056377 |
| C  | 3.954613  | 1.666580  | -1.092640 |
| C  | 4.521611  | 2.212902  | 0.061038  |
| C  | 4.491147  | 1.491358  | 1.253563  |
| H  | 2.917198  | 0.000270  | -1.965905 |
| H  | 3.968714  | 2.229312  | -2.028862 |
| H  | 4.983618  | 3.202227  | 0.029110  |
| H  | 4.928173  | 1.913318  | 2.161469  |
| H  | 3.873106  | -0.330505 | 2.229192  |
| C  | 2.713956  | -1.672138 | 0.230877  |
| C  | 2.243089  | -2.427340 | -0.799011 |
| H  | 2.714739  | -2.113383 | 1.234622  |
| H  | 2.333012  | -2.119724 | -1.845467 |
| H  | 1.896044  | -3.447942 | -0.616150 |

54

Figure 4\_para-H\_pcl / electronic energy: -2669.90144009 a.u. / lowest freq: -6.95 cm-1

|    |           |           |           |
|----|-----------|-----------|-----------|
| H  | 4.526083  | 2.947197  | 1.659768  |
| H  | 2.068393  | 3.174821  | 2.028713  |
| C  | 3.819489  | 2.544541  | 0.930260  |
| C  | 2.445267  | 2.672319  | 1.134486  |
| H  | 5.356328  | 1.770110  | -0.376468 |
| C  | 4.282817  | 1.887440  | -0.210104 |
| H  | -3.947999 | 1.733054  | 2.785530  |
| C  | 1.543482  | 2.152475  | 0.209237  |
| H  | -3.319846 | -0.614468 | 3.082854  |
| H  | 0.472072  | 2.251264  | 0.399178  |
| C  | 3.382644  | 1.367060  | -1.135569 |
| C  | 1.996742  | 1.495252  | -0.949486 |
| C  | -4.404692 | 1.551252  | 1.801019  |
| C  | -3.915735 | -0.866126 | 2.192824  |
| H  | -4.213283 | 2.431577  | 1.173519  |
| O  | -2.428888 | 0.491826  | 0.905983  |
| H  | 3.756427  | 0.850725  | -2.023436 |
| H  | -4.951964 | -1.047302 | 2.513996  |
| H  | -5.491389 | 1.451882  | 1.945890  |
| C  | -3.824364 | 0.284842  | 1.190920  |
| C  | 1.069168  | 0.931420  | -1.947648 |
| B  | -2.100026 | -0.201619 | -0.246566 |
| H  | -0.694566 | 2.092778  | -1.440965 |
| C  | -0.276373 | 1.271049  | -2.027464 |
| C  | -4.392350 | -0.087185 | -0.221924 |
| H  | -3.981950 | 1.889969  | -1.054108 |
| O  | -3.245235 | -0.677518 | -0.859224 |
| H  | -5.701533 | 1.612244  | -0.661365 |
| H  | -6.393875 | -0.700531 | 0.352913  |
| C  | -4.786025 | 1.139061  | -1.045854 |
| H  | -0.849001 | 0.992102  | -2.916984 |
| C  | -5.532771 | -1.093187 | -0.209284 |
| H  | -4.970151 | 0.829800  | -2.085381 |
| H  | -5.864543 | -1.293327 | -1.239186 |
| Cu | -0.198712 | -0.440422 | -0.916913 |
| H  | 1.529055  | 0.381036  | -2.774026 |
| H  | -3.512045 | -1.798378 | 1.769856  |
| H  | -5.227758 | -2.048326 | 0.237689  |
| H  | 3.759391  | -2.409637 | -1.489341 |
| H  | 1.396353  | -2.360114 | -1.810821 |
| H  | 5.792782  | -1.937419 | -0.157151 |
| C  | 3.663364  | -1.986432 | -0.485543 |
| C  | 4.807816  | -1.723576 | 0.265292  |
| C  | 1.194985  | -2.068212 | -0.774492 |
| H  | -0.220943 | -2.394329 | 0.837905  |
| C  | 2.383712  | -1.732012 | 0.031589  |
| C  | -0.058656 | -2.355040 | -0.243441 |
| C  | 4.697654  | -1.183016 | 1.545771  |
| H  | 5.593575  | -0.968742 | 2.133083  |
| C  | 2.288147  | -1.174935 | 1.318762  |
| H  | -0.789236 | -2.900516 | -0.846500 |

|   |          |           |          |
|---|----------|-----------|----------|
| C | 3.431545 | -0.904993 | 2.064998 |
| H | 1.306979 | -0.938647 | 1.738522 |
| H | 3.333189 | -0.462930 | 3.059452 |

54

Figure 4\_para-H\_ts(CuBadd)\_01 / electronic energy: -2669.89657616 a.u. / lowest freq: -163.08 cm-1

|    |           |           |           |
|----|-----------|-----------|-----------|
| H  | 4.199534  | 3.205904  | 1.384609  |
| H  | 1.773082  | 3.122498  | 1.970892  |
| C  | 3.483312  | 2.729406  | 0.711297  |
| C  | 2.128051  | 2.682351  | 1.035082  |
| H  | 4.972460  | 2.166586  | -0.750344 |
| C  | 3.911886  | 2.148562  | -0.485507 |
| H  | -3.526846 | 1.576486  | 2.896930  |
| C  | 1.213463  | 2.068777  | 0.181365  |
| H  | -2.907297 | -0.800261 | 2.935062  |
| H  | 0.161351  | 2.031215  | 0.476035  |
| C  | 3.002963  | 1.538376  | -1.342288 |
| C  | 1.625967  | 1.486476  | -1.037405 |
| C  | -4.049447 | 1.490242  | 1.932754  |
| C  | -3.583337 | -0.961992 | 2.082720  |
| H  | -3.876773 | 2.417399  | 1.370900  |
| O  | -2.165707 | 0.480556  | 0.808943  |
| H  | 3.357551  | 1.085355  | -2.272367 |
| H  | -4.593475 | -1.146465 | 2.475899  |
| H  | -5.126851 | 1.398454  | 2.137876  |
| C  | -3.544527 | 0.270780  | 1.180549  |
| C  | 0.689627  | 0.814593  | -1.938149 |
| B  | -1.959124 | -0.158495 | -0.393005 |
| H  | -1.141750 | 1.764171  | -1.209255 |
| C  | -0.741822 | 0.909888  | -1.770058 |
| C  | -4.220268 | 0.029394  | -0.214414 |
| H  | -3.781388 | 2.050446  | -0.920736 |
| O  | -3.137346 | -0.554197 | -0.972734 |
| H  | -5.482171 | 1.799527  | -0.445371 |
| H  | -6.189679 | -0.561690 | 0.466016  |
| C  | -4.610072 | 1.326545  | -0.919626 |
| H  | -1.344060 | 0.675016  | -2.654186 |
| C  | -5.393073 | -0.935786 | -0.194736 |
| H  | -4.866430 | 1.103522  | -1.965721 |
| H  | -5.811919 | -1.038549 | -1.206823 |
| Cu | -0.082664 | -0.763650 | -0.902801 |
| H  | 1.079444  | 0.496069  | -2.908981 |
| H  | -3.245768 | -1.862527 | 1.548148  |
| H  | -5.092033 | -1.933909 | 0.149541  |
| H  | 3.739948  | -2.385964 | -1.407450 |
| H  | 1.411330  | -2.773580 | -1.467189 |
| H  | 5.794144  | -1.555922 | -0.303641 |
| C  | 3.670035  | -1.891039 | -0.434808 |
| C  | 4.826244  | -1.424273 | 0.186441  |
| C  | 1.214712  | -2.274214 | -0.511712 |
| H  | -0.186027 | -2.320860 | 1.163100  |
| C  | 2.411078  | -1.744876 | 0.170329  |
| C  | -0.038251 | -2.485973 | 0.091490  |
| C  | 4.749415  | -0.789150 | 1.425774  |
| H  | 5.653363  | -0.416455 | 1.912821  |
| C  | 2.347848  | -1.090916 | 1.413469  |
| H  | -0.743342 | -3.179687 | -0.375703 |
| C  | 3.502969  | -0.620754 | 2.030792  |
| H  | 1.382871  | -0.938168 | 1.902817  |
| H  | 3.427415  | -0.109660 | 2.993561  |

54

Figure 4\_para-H\_ts(CuBadd)\_02 / electronic energy: -2669.89201608 a.u. / lowest freq: -175.57 cm-1

|    |           |           |           |
|----|-----------|-----------|-----------|
| H  | 4.113744  | 4.842078  | 0.775262  |
| H  | 1.633192  | 4.891830  | 1.062011  |
| C  | 3.491905  | 4.048226  | 0.355260  |
| C  | 2.105120  | 4.072059  | 0.513283  |
| H  | 5.153775  | 2.955244  | -0.493602 |
| C  | 4.069809  | 2.991503  | -0.353813 |
| H  | -4.963344 | 2.301923  | 1.010987  |
| C  | 1.307094  | 3.062800  | -0.021405 |
| H  | -3.930727 | 0.745940  | 2.600670  |
| H  | 0.225218  | 3.109589  | 0.129748  |
| C  | 3.277914  | 1.982123  | -0.891254 |
| C  | 1.873068  | 1.984641  | -0.738200 |
| C  | -4.994772 | 1.552402  | 0.206506  |
| C  | -4.095654 | -0.070777 | 1.882659  |
| H  | -4.820447 | 2.070217  | -0.745779 |
| O  | -2.636733 | 1.057783  | 0.361999  |
| H  | 3.746653  | 1.162470  | -1.443471 |
| H  | -5.098583 | -0.485386 | 2.058337  |
| H  | -6.004724 | 1.115742  | 0.187936  |
| C  | -3.953214 | 0.476099  | 0.463098  |
| C  | 1.082808  | 0.883509  | -1.283114 |
| B  | -1.796939 | 0.100684  | -0.150844 |
| H  | -0.867504 | 1.873615  | -1.301522 |
| C  | -0.368537 | 0.900842  | -1.389624 |
| C  | -3.893070 | -0.654263 | -0.625534 |
| H  | -3.697966 | 0.762284  | -2.279017 |
| O  | -2.486660 | -0.981542 | -0.639383 |
| H  | -5.324792 | 0.045349  | -2.122765 |
| H  | -5.756177 | -1.658547 | -0.156236 |
| C  | -4.248344 | -0.156077 | -2.024681 |
| H  | -0.775710 | 0.302393  | -2.212504 |
| C  | -4.691347 | -1.902544 | -0.289072 |
| H  | -3.976023 | -0.928782 | -2.758444 |
| H  | -4.610778 | -2.632484 | -1.108203 |
| Cu | 0.203702  | -0.063774 | 0.264220  |
| H  | 1.625611  | 0.166942  | -1.907074 |

|   |           |           |           |
|---|-----------|-----------|-----------|
| H | -3.351399 | -0.855113 | 2.087025  |
| H | -4.324667 | -2.381989 | 0.627856  |
| H | 4.097695  | -0.752970 | 0.967879  |
| H | 2.064803  | -0.124450 | 1.989214  |
| H | 5.495849  | -2.311950 | -0.357480 |
| C | 3.652455  | -1.658288 | 0.546472  |
| C | 4.437201  | -2.533273 | -0.200931 |
| C | 1.488680  | -0.940412 | 1.537944  |
| H | -0.229579 | -0.488974 | 2.762559  |
| C | 2.287954  | -1.914365 | 0.763415  |
| C | 0.161673  | -1.121423 | 1.960476  |
| C | 3.876266  | -3.688199 | -0.747516 |
| H | 4.489598  | -4.374307 | -1.336139 |
| C | 1.737118  | -3.085157 | 0.213422  |
| H | -0.363827 | -2.069468 | 1.811658  |
| C | 2.523069  | -3.958210 | -0.534217 |
| H | 0.678394  | -3.312310 | 0.359620  |
| H | 2.073019  | -4.860094 | -0.956641 |

54

Figure 4\_para-H\_L-Cu-alkyl\_01 / electronic energy: -2669.93751624 a.u. / lowest freq: 16.81 cm-1

|    |           |           |           |
|----|-----------|-----------|-----------|
| H  | 3.517841  | 3.568113  | 1.129892  |
| H  | 1.063163  | 3.763756  | 1.549427  |
| C  | 2.803033  | 3.017369  | 0.513774  |
| C  | 1.432574  | 3.121011  | 0.744663  |
| H  | 4.312473  | 2.096614  | -0.733267 |
| C  | 3.242632  | 2.194139  | -0.528322 |
| H  | -3.542082 | 1.888232  | 2.719067  |
| C  | 0.515455  | 2.419239  | -0.040784 |
| H  | -1.347668 | 0.853575  | 2.372493  |
| H  | -0.550092 | 2.514754  | 0.176109  |
| C  | 2.332087  | 1.492532  | -1.308171 |
| C  | 0.936352  | 1.573218  | -1.089094 |
| C  | -4.060916 | 1.134910  | 2.107946  |
| C  | -1.840311 | 0.003042  | 1.879398  |
| H  | -4.888037 | 1.633621  | 1.586088  |
| O  | -2.627453 | 1.487184  | 0.193466  |
| H  | 2.700751  | 0.847640  | -2.112575 |
| H  | -2.091488 | -0.743772 | 2.645815  |
| H  | -4.478617 | 0.376417  | 2.787157  |
| C  | -3.081787 | 0.499897  | 1.136619  |
| C  | 0.001911  | 0.767294  | -1.919079 |
| B  | -2.361058 | 0.835786  | -0.986586 |
| H  | -1.408062 | 2.457606  | -2.194526 |
| C  | -1.422299 | 1.352653  | -2.125066 |
| C  | -3.700663 | -0.589394 | 0.188661  |
| H  | -5.291435 | 0.734437  | -0.511915 |
| O  | -2.918964 | -0.422700 | -1.007909 |
| H  | -5.828740 | -0.487401 | 0.675039  |
| H  | -4.040098 | -2.144108 | 1.663333  |
| C  | -5.156046 | -0.304058 | -0.175152 |
| H  | -1.813850 | 0.978143  | -3.085524 |
| C  | -3.551957 | -2.017811 | 0.685236  |
| H  | -5.456153 | -0.969374 | -0.998091 |
| H  | -4.024833 | -2.713002 | -0.024233 |
| Cu | 0.053660  | -1.014159 | -1.010155 |
| H  | 0.476463  | 0.606057  | -2.902371 |
| H  | -1.116564 | -0.440850 | 1.175752  |
| H  | -2.495649 | -2.299092 | 0.779499  |
| H  | 3.975118  | -2.319889 | -1.249849 |
| H  | 1.714086  | -2.916845 | -1.414654 |
| H  | 5.858847  | -1.135806 | -0.154524 |
| C  | 3.806889  | -1.776506 | -0.316345 |
| C  | 4.865289  | -1.109937 | 0.298651  |
| C  | 1.436642  | -2.490514 | -0.443263 |
| H  | -0.052825 | -2.592979 | 1.114311  |
| C  | 2.524249  | -1.761269 | 0.248210  |
| C  | 0.215150  | -2.819362 | 0.077894  |
| C  | 4.652486  | -0.407836 | 1.483158  |
| H  | 5.478469  | 0.121646  | 1.963530  |
| C  | 2.319654  | -1.039990 | 1.436224  |
| H  | -0.443498 | -3.503026 | -0.465542 |
| C  | 3.374969  | -0.370536 | 2.046184  |
| H  | 1.322902  | -0.980767 | 1.880063  |
| H  | 3.197719  | 0.193569  | 2.964409  |

54

Figure 4\_para-H\_L-Cu-alkyl\_02 / electronic energy: -2669.93402914 a.u. / lowest freq: 18.78 cm-1

|   |           |           |           |
|---|-----------|-----------|-----------|
| C | 4.003046  | -0.290454 | 0.383196  |
| C | 3.660617  | 0.751408  | 1.257768  |
| C | 4.608967  | 0.028967  | -0.841623 |
| C | 4.857277  | 1.355899  | -1.180902 |
| C | 4.507698  | 2.384692  | -0.304312 |
| C | 3.909839  | 2.078255  | 0.917414  |
| H | 4.895202  | -0.764073 | -1.535985 |
| H | 5.331783  | 1.588692  | -2.136995 |
| H | 4.701270  | 3.425334  | -0.574273 |
| H | 3.626708  | 2.876329  | 1.606839  |
| H | 3.179011  | 0.516492  | 2.210479  |
| C | 3.680551  | -1.681488 | 0.776702  |
| C | 3.737473  | -2.790862 | -0.020035 |
| H | 3.465905  | -1.821110 | 1.843070  |
| H | 4.080390  | -2.750488 | -1.058835 |
| H | 3.610507  | -3.784897 | 0.418215  |
| B | -2.524955 | -1.119973 | 0.130981  |
| O | -3.274618 | -0.631770 | 1.170502  |
| O | -3.044085 | -0.763130 | -1.088427 |
| C | -4.457626 | -0.018473 | 0.627138  |
| C | -4.037724 | 0.251341  | -0.866115 |



|    |           |           |           |
|----|-----------|-----------|-----------|
| C  | -4.780754 | 1.233149  | 1.427888  |
| C  | -5.591670 | -1.033885 | 0.757727  |
| C  | -3.348646 | 1.602598  | -1.059590 |
| C  | -5.156911 | 0.086034  | -1.881863 |
| H  | -2.539507 | 1.752113  | -0.329139 |
| H  | -4.061029 | 2.435837  | -0.972564 |
| H  | -2.901159 | 1.634561  | -2.063727 |
| H  | -5.573555 | -0.929639 | -1.868716 |
| H  | -4.770857 | 0.280890  | -2.893486 |
| H  | -5.969415 | 0.801741  | -1.684567 |
| H  | -5.379156 | -1.949687 | 0.186036  |
| H  | -6.549230 | -0.619289 | 0.410266  |
| H  | -5.703258 | -1.312900 | 1.815912  |
| H  | -5.631839 | 1.769681  | 0.981817  |
| H  | -3.921783 | 1.915161  | 1.476873  |
| H  | -5.054013 | 0.958383  | 2.457733  |
| C  | 0.635333  | 1.105687  | -1.136356 |
| C  | 0.787687  | 2.463585  | -0.883528 |
| C  | 0.133767  | 0.212668  | -0.161731 |
| C  | 0.445963  | 2.999006  | 0.363036  |
| C  | -0.194820 | 0.774867  | 1.090362  |
| C  | -0.042712 | 2.138638  | 1.345025  |
| C  | -0.017867 | -1.239231 | -0.456055 |
| C  | -1.186771 | -1.932866 | 0.285825  |
| H  | -0.316554 | 2.533083  | 2.328043  |
| H  | -0.591910 | 0.133282  | 1.880326  |
| H  | 0.563646  | 4.066766  | 0.562202  |
| H  | 1.175470  | 3.117488  | -1.669833 |
| H  | 0.907852  | 0.708960  | -2.119790 |
| Cu | 1.798799  | -1.941933 | -0.099842 |
| H  | -0.971815 | -2.097921 | 1.355515  |
| H  | -1.325226 | -2.942999 | -0.138747 |
| H  | -0.184525 | -1.343874 | -1.542595 |

54

Figure 4\_para-H\_L-Cu-alkyl\_03 / electronic energy: -2669.93662784 a.u. / lowest freq: 14.18 cm<sup>-1</sup>

|    |           |           |           |
|----|-----------|-----------|-----------|
| B  | -2.514191 | 1.122633  | 0.242061  |
| O  | -3.085841 | 0.287674  | 1.173100  |
| O  | -3.183898 | 1.091187  | -0.954207 |
| C  | -4.018364 | -0.560412 | 0.479802  |
| C  | -4.377794 | 0.308010  | -0.780258 |
| C  | -5.192695 | -0.876063 | 1.391553  |
| C  | -3.267174 | -1.843623 | 0.122977  |
| C  | -5.524258 | 1.284861  | -0.523959 |
| C  | -4.640877 | -0.489347 | -2.047812 |
| H  | -5.364630 | 1.856994  | 0.402101  |
| H  | -6.491516 | 0.766884  | -0.452285 |
| H  | -5.576950 | 1.999943  | -1.358018 |
| H  | -3.758875 | -1.068093 | -2.352508 |
| H  | -4.896931 | 0.194008  | -2.871063 |
| H  | -5.484526 | -1.181485 | -1.904867 |
| H  | -2.413257 | -1.634160 | -0.540862 |
| H  | -3.921121 | -2.578569 | -0.367811 |
| H  | -2.875859 | -2.295003 | 1.046711  |
| H  | -5.969011 | -1.433082 | 0.845422  |
| H  | -5.642220 | 0.035525  | 1.806553  |
| H  | -4.856804 | -1.500074 | 2.233052  |
| C  | 2.268286  | 1.596178  | -1.177729 |
| C  | 3.567653  | 2.072867  | -1.059342 |
| C  | 1.294475  | 1.808955  | -0.172863 |
| C  | 3.962613  | 2.790031  | 0.075553  |
| C  | 1.712098  | 2.548359  | 0.952383  |
| C  | 3.020566  | 3.021328  | 1.075856  |
| C  | -0.072134 | 1.233880  | -0.313544 |
| C  | -1.195046 | 1.929341  | 0.481131  |
| H  | 3.301879  | 3.586182  | 1.969638  |
| H  | 1.000352  | 2.755837  | 1.754947  |
| H  | 4.985289  | 3.162105  | 0.173440  |
| H  | 4.286738  | 1.879502  | -1.860282 |
| H  | 1.986483  | 1.026155  | -2.069348 |
| Cu | 0.182332  | -0.675705 | 0.187992  |
| H  | -1.307722 | 2.994233  | 0.190639  |
| H  | -0.985292 | 1.920875  | 1.563752  |
| H  | -0.338678 | 1.227187  | -1.385653 |
| H  | 5.079036  | -0.262103 | 1.688234  |
| C  | 4.592708  | -0.802645 | 0.873397  |
| H  | 2.789344  | -1.112448 | 1.993158  |
| H  | 6.273696  | -0.604035 | -0.471069 |
| C  | 3.301179  | -1.286711 | 1.044235  |
| C  | 5.261881  | -0.993750 | -0.337783 |
| H  | 0.851208  | -2.131752 | 2.215429  |
| C  | 4.629499  | -1.672256 | -1.377499 |
| C  | 2.652751  | -1.973526 | 0.004143  |
| C  | 0.486189  | -2.480435 | 1.244247  |
| H  | 5.144064  | -1.822097 | -2.329363 |
| C  | 3.333404  | -2.156148 | -1.207638 |
| C  | 1.267260  | -2.482664 | 0.123066  |
| H  | 2.836113  | -2.680973 | -2.027688 |
| H  | 0.888749  | -3.000068 | -0.766740 |
| H  | -0.471620 | -3.007506 | 1.241771  |

54

Figure 4\_para-H\_ts(BHE) / electronic energy: -2669.89885582 a.u. / lowest freq: -839.76 cm<sup>-1</sup>

|   |           |           |           |
|---|-----------|-----------|-----------|
| B | -2.395824 | 0.575511  | 0.228088  |
| O | -3.486182 | 1.027255  | 0.910411  |
| O | -2.715702 | -0.208423 | -0.843130 |
| C | -4.632978 | 0.305873  | 0.409253  |
| C | -4.146652 | -0.134619 | -1.021245 |
| C | -5.842371 | 1.224928  | 0.414907  |

|    |           |           |           |
|----|-----------|-----------|-----------|
| C  | -4.856785 | -0.872453 | 1.354714  |
| C  | -4.406101 | 0.921920  | -2.092706 |
| C  | -4.661034 | -1.489009 | -1.479200 |
| H  | -4.043395 | 1.911675  | -1.777389 |
| H  | -5.476469 | 1.001718  | -2.330184 |
| H  | -3.869780 | 0.641484  | -3.011061 |
| H  | -4.341393 | -2.294200 | -0.805106 |
| H  | -4.273294 | -1.712631 | -2.483963 |
| H  | -5.760150 | -1.488238 | -1.531425 |
| H  | -3.994013 | -1.555702 | 1.359567  |
| H  | -5.755351 | -1.445170 | 1.084071  |
| H  | -4.989718 | -0.488405 | 2.376713  |
| H  | -6.707028 | 0.728347  | -0.050427 |
| H  | -5.645142 | 2.162165  | -0.121417 |
| H  | -6.112302 | 1.476733  | 1.451101  |
| C  | 2.286497  | 1.702596  | -1.264341 |
| C  | 3.525429  | 2.316487  | -1.121884 |
| C  | 1.407128  | 1.554945  | -0.170925 |
| C  | 3.939543  | 2.803886  | 0.120677  |
| C  | 1.848626  | 2.040503  | 1.078481  |
| C  | 3.090291  | 2.658401  | 1.217119  |
| C  | 0.113451  | 0.893554  | -0.352389 |
| C  | -0.923478 | 0.909571  | 0.640052  |
| H  | 3.398810  | 3.026542  | 2.199366  |
| H  | 1.212145  | 1.933654  | 1.960543  |
| H  | 4.913530  | 3.285799  | 0.232108  |
| H  | 4.182064  | 2.410073  | -1.990957 |
| H  | 1.980447  | 1.322985  | -2.243273 |
| Cu | 0.150735  | -0.847959 | 0.757424  |
| H  | -0.837563 | 1.634122  | 1.458179  |
| H  | -0.940687 | -0.280274 | 1.755326  |
| H  | -0.156031 | 0.614322  | -1.375536 |
| H  | 5.317195  | -0.247444 | 1.536877  |
| C  | 4.768553  | -0.674365 | 0.694082  |
| H  | 3.046556  | -1.134120 | 1.893772  |
| H  | 6.354485  | -0.305710 | -0.729685 |
| C  | 3.486537  | -1.176109 | 0.894394  |
| C  | 5.348654  | -0.703112 | -0.575535 |
| H  | 1.384777  | -2.660685 | 2.138785  |
| C  | 4.626418  | -1.228180 | -1.646124 |
| C  | 2.751114  | -1.717407 | -0.173566 |
| C  | 0.818933  | -2.684844 | 1.201834  |
| H  | 5.066876  | -1.250042 | -2.645867 |
| C  | 3.338828  | -1.723552 | -1.447625 |
| C  | 1.389304  | -2.267947 | -0.004945 |
| H  | 2.777518  | -2.130160 | -2.293223 |
| H  | 0.911987  | -2.599712 | -0.934507 |
| H  | -0.040639 | -3.360931 | 1.183443  |

54

Figure 4 para-H\_pc2 / electronic energy: -2669.92145947 a.u. / lowest freq: -9.23 cm<sup>-1</sup>

|    |           |           |           |
|----|-----------|-----------|-----------|
| B  | -2.201411 | 0.864498  | -0.130727 |
| O  | -3.342660 | 1.385239  | 0.405356  |
| O  | -2.424382 | -0.250276 | -0.894245 |
| C  | -4.383207 | 0.401751  | 0.221566  |
| C  | -3.852307 | -0.416893 | -1.013768 |
| C  | -5.706946 | 1.109946  | -0.008430 |
| C  | -4.436313 | -0.425819 | 1.504244  |
| C  | -4.264540 | 0.185566  | -2.354632 |
| C  | -4.179972 | -1.900245 | -0.977708 |
| H  | -4.045112 | 1.262640  | -2.398634 |
| H  | -5.336945 | 0.039399  | -2.547795 |
| H  | -3.700864 | -0.309507 | -3.159108 |
| H  | -3.740419 | -2.389954 | -0.098912 |
| H  | -3.781464 | -2.392013 | -1.877400 |
| H  | -5.269032 | -2.056209 | -0.959105 |
| H  | -3.480299 | -0.938266 | 1.689052  |
| H  | -5.240346 | -1.174654 | 1.470961  |
| H  | -4.623863 | 0.246195  | 2.354325  |
| H  | -6.494832 | 0.382447  | -0.254611 |
| H  | -5.641180 | 1.845991  | -0.820470 |
| H  | -6.009085 | 1.640943  | 0.906284  |
| C  | 2.614476  | 1.376987  | -1.471369 |
| C  | 3.910333  | 1.872287  | -1.352397 |
| C  | 1.688736  | 1.533169  | -0.429756 |
| C  | 4.308075  | 2.521637  | -0.183345 |
| C  | 2.102550  | 2.182756  | 0.745211  |
| C  | 3.400032  | 2.672586  | 0.865758  |
| C  | 0.323939  | 0.990151  | -0.575663 |
| C  | -0.776699 | 1.443005  | 0.117137  |
| H  | 3.706822  | 3.170012  | 1.788769  |
| H  | 1.405822  | 2.288489  | 1.580643  |
| H  | 5.326960  | 2.903921  | -0.086502 |
| H  | 4.619233  | 1.740433  | -2.173100 |
| H  | 2.310883  | 0.859792  | -2.384795 |
| Cu | -0.139344 | -0.231732 | 1.240663  |
| H  | -0.671002 | 2.311311  | 0.775555  |
| H  | -0.854839 | 0.102580  | 2.603680  |
| H  | 0.180232  | 0.282806  | -1.399541 |
| H  | 5.187420  | -0.699180 | 1.418489  |
| C  | 4.501524  | -1.103098 | 0.670202  |
| H  | 2.794624  | -0.958420 | 1.971353  |
| H  | 6.035726  | -1.338137 | -0.835435 |
| C  | 3.154171  | -1.254790 | 0.982383  |
| C  | 4.976965  | -1.457644 | -0.594418 |
| H  | 0.958818  | -2.282238 | 2.475016  |
| C  | 4.088703  | -1.948890 | -1.549420 |
| C  | 2.251824  | -1.762374 | 0.033515  |

|   |           |           |           |
|---|-----------|-----------|-----------|
| C | 0.315764  | -2.230516 | 1.591369  |
| H | 4.448226  | -2.220671 | -2.544886 |
| C | 2.736434  | -2.090834 | -1.240009 |
| C | 0.821399  | -1.983154 | 0.337498  |
| H | 2.043108  | -2.474287 | -1.993685 |
| H | 0.179626  | -2.184082 | -0.527118 |
| H | -0.693517 | -2.634807 | 1.704690  |

36

Figure 4\_para-H-alkenylBpin / electronic energy: -719.616306926 a.u. / lowest freq: 11.87 cm<sup>-1</sup>

|   |           |           |           |
|---|-----------|-----------|-----------|
| B | 0.922364  | -0.365147 | -0.028404 |
| O | 1.894117  | -1.316245 | -0.173823 |
| O | 1.433940  | 0.892512  | 0.148584  |
| C | 3.161660  | -0.695762 | 0.122071  |
| C | 2.848301  | 0.828137  | -0.120020 |
| C | 4.227554  | -1.277336 | -0.792080 |
| C | 3.487647  | -1.014695 | 1.579963  |
| C | 3.048728  | 1.254565  | -1.573413 |
| C | 3.579766  | 1.781941  | 0.809984  |
| H | 2.542480  | 0.568799  | -2.269063 |
| H | 4.114997  | 1.296474  | -1.838243 |
| H | 2.618726  | 2.256986  | -1.714756 |
| H | 3.324723  | 1.603424  | 1.862628  |
| H | 3.311513  | 2.820863  | 0.566919  |
| H | 4.668438  | 1.676163  | 0.689783  |
| H | 2.735025  | -0.594781 | 2.263998  |
| H | 4.475038  | -0.625732 | 1.866988  |
| H | 3.496130  | -2.106186 | 1.715677  |
| H | 5.185806  | -0.755417 | -0.649802 |
| H | 3.942879  | -1.205244 | -1.849722 |
| H | 4.382907  | -2.340283 | -0.555288 |
| C | -3.806743 | 1.248461  | 0.192092  |
| C | -5.197110 | 1.149758  | 0.183811  |
| C | -2.998838 | 0.113525  | 0.018524  |
| C | -5.806490 | -0.090352 | -0.001273 |
| C | -3.628094 | -1.129019 | -0.169041 |
| C | -5.016012 | -1.228789 | -0.178362 |
| C | -1.532965 | 0.275159  | 0.038943  |
| C | -0.597425 | -0.686080 | -0.066780 |
| H | -5.487864 | -2.203239 | -0.325431 |
| H | -3.028632 | -2.030869 | -0.311211 |
| H | -6.895940 | -0.172912 | -0.008967 |
| H | -5.805802 | 2.046357  | 0.322501  |
| H | -3.332001 | 2.222916  | 0.336640  |
| H | -0.908917 | -1.730947 | -0.184153 |
| H | -1.195659 | 1.312156  | 0.158923  |

75

Figure 4\_para-H\_pc3\_01 / electronic energy: -3508.77967897 a.u. / lowest freq: -6.16 cm<sup>-1</sup>

|    |           |           |           |
|----|-----------|-----------|-----------|
| C  | 0.950693  | 0.488510  | -0.713090 |
| C  | 1.316633  | 0.225649  | 0.587395  |
| C  | 2.240967  | 1.127317  | 1.354419  |
| O  | 3.615187  | 0.758138  | 1.131462  |
| P  | 4.324780  | 1.108053  | -0.261181 |
| O  | 3.955381  | 2.388604  | -0.897168 |
| O  | 5.841255  | 0.933215  | 0.223443  |
| O  | 4.053131  | -0.123551 | -1.253915 |
| C  | 6.893601  | 1.117437  | -0.718938 |
| H  | 0.553798  | -0.286579 | -1.374373 |
| H  | 1.274818  | 1.414210  | -1.201031 |
| H  | 1.197430  | -0.785845 | 0.992296  |
| H  | 2.096032  | 2.182950  | 1.076809  |
| H  | 2.099394  | 1.025874  | 2.437175  |
| B  | -2.241842 | -1.175948 | -1.401357 |
| O  | -2.363727 | -2.310977 | -0.643875 |
| O  | -1.393736 | -1.359104 | -2.465930 |
| C  | -1.407330 | -3.279069 | -1.115047 |
| C  | -1.102363 | -2.765070 | -2.572339 |
| C  | -2.028611 | -4.664525 | -1.039880 |
| C  | -0.190835 | -3.205856 | -0.195917 |
| C  | -2.052016 | -3.340049 | -3.621388 |
| C  | 0.340300  | -2.942214 | -3.020678 |
| H  | -3.103883 | -3.220127 | -3.321962 |
| H  | -1.859726 | -4.407609 | -3.800445 |
| H  | -1.907763 | -2.801722 | -4.569593 |
| H  | 1.043312  | -2.409577 | -2.366314 |
| H  | 0.463948  | -2.546607 | -4.039592 |
| H  | 0.613248  | -4.008243 | -3.033200 |
| H  | 0.280109  | -2.215423 | -0.242153 |
| H  | 0.562400  | -3.959477 | -0.466044 |
| H  | -0.504443 | -3.384284 | 0.841673  |
| H  | -1.350648 | -5.417833 | -1.468691 |
| H  | -2.988317 | -4.712876 | -1.570425 |
| H  | -2.209050 | -4.930077 | 0.012375  |
| C  | -1.861212 | 3.862824  | -1.212240 |
| C  | -2.363323 | 5.142461  | -1.006446 |
| C  | -2.596948 | 2.705512  | -0.865869 |
| C  | -3.630966 | 5.327331  | -0.442397 |
| C  | -3.876778 | 2.916984  | -0.315107 |
| C  | -4.380098 | 4.202702  | -0.102639 |
| C  | -2.000892 | 1.361555  | -1.048482 |
| C  | -2.975016 | 0.177273  | -1.097444 |
| H  | -5.376692 | 4.322939  | 0.332140  |
| H  | -4.495955 | 2.058510  | -0.044607 |
| H  | -4.027414 | 6.332320  | -0.279257 |
| H  | -1.761274 | 6.010255  | -1.291265 |
| H  | -0.866209 | 3.740115  | -1.653104 |
| Cu | -0.677468 | 0.975118  | 0.445897  |
| H  | -3.755710 | 0.326903  | -1.875932 |

|   |           |           |           |
|---|-----------|-----------|-----------|
| H | -3.529322 | 0.060969  | -0.150213 |
| H | -1.388616 | 1.369634  | -1.964294 |
| H | 7.837665  | 1.063392  | -0.163137 |
| H | 6.815894  | 2.099802  | -1.208570 |
| H | 6.880965  | 0.327651  | -1.486321 |
| C | 4.169528  | -1.474761 | -0.829963 |
| H | 4.180742  | -2.097820 | -1.733344 |
| H | 3.312084  | -1.762952 | -0.202729 |
| H | 5.100998  | -1.641769 | -0.266983 |
| H | -2.943174 | -3.387328 | 2.720989  |
| H | -1.011538 | -4.412360 | 3.920564  |
| C | -2.076358 | -2.778123 | 2.987191  |
| H | -2.907323 | -1.010039 | 2.102523  |
| C | -0.994181 | -3.352842 | 3.654763  |
| C | -2.055750 | -1.430248 | 2.640058  |
| C | 0.113127  | -2.565234 | 3.972916  |
| C | -0.955656 | -0.622272 | 2.967878  |
| H | 0.968709  | -3.004908 | 4.490929  |
| C | 0.129332  | -1.213793 | 3.634299  |
| C | -0.898860 | 0.818680  | 2.634179  |
| H | 0.997013  | -0.599874 | 3.891644  |
| H | -0.046955 | 1.363356  | 3.052221  |
| H | -1.848486 | 2.628516  | 2.002471  |
| C | -1.905242 | 1.536966  | 2.039493  |
| H | -2.882361 | 1.102975  | 1.812763  |

75

Figure 4\_para-H\_pc3\_02 / electronic energy: -3508.78340558 a.u. / lowest freq: 29.76 cm-1

|    |           |           |           |
|----|-----------|-----------|-----------|
| C  | -0.368967 | -1.608150 | -0.595580 |
| C  | 0.117772  | -1.719012 | 0.681946  |
| C  | 1.593992  | -1.631504 | 0.986136  |
| O  | 2.357216  | -2.537753 | 0.171852  |
| P  | 3.272302  | -1.962266 | -1.007030 |
| O  | 2.601629  | -1.286533 | -2.138813 |
| O  | 4.305900  | -1.042454 | -0.190722 |
| O  | 4.076173  | -3.256642 | -1.462838 |
| C  | 4.884552  | 0.120124  | -0.776446 |
| H  | -1.392031 | -1.906905 | -0.842358 |
| H  | 0.313897  | -1.454368 | -1.437742 |
| H  | -0.525120 | -2.116540 | 1.473636  |
| H  | 1.980610  | -0.610117 | 0.846847  |
| H  | 1.789189  | -1.906853 | 2.029859  |
| B  | -3.682361 | 0.511674  | -0.834521 |
| O  | -4.361838 | 0.640202  | 0.354873  |
| O  | -3.797662 | -0.754227 | -1.351969 |
| C  | -4.728686 | -0.677448 | 0.798905  |
| C  | -4.739477 | -1.488637 | -0.549105 |
| C  | -6.067158 | -0.615323 | 1.515555  |
| C  | -3.634387 | -1.135738 | 1.762865  |
| C  | -6.084685 | -1.432937 | -1.270346 |
| C  | -4.272606 | -2.929945 | -0.423850 |
| H  | -6.444512 | -0.398247 | -1.371682 |
| H  | -6.852411 | -2.019915 | -0.745983 |
| H  | -5.965031 | -1.850179 | -2.281110 |
| H  | -3.251098 | -2.998741 | -0.027325 |
| H  | -4.286765 | -3.413229 | -1.411818 |
| H  | -4.941287 | -3.497516 | 0.240936  |
| H  | -2.653147 | -1.153885 | 1.263554  |
| H  | -3.839161 | -2.133182 | 2.176752  |
| H  | -3.572436 | -0.424739 | 2.600173  |
| H  | -6.412716 | -1.626623 | 1.778582  |
| H  | -6.835926 | -0.131346 | 0.899357  |
| H  | -5.966130 | -0.039241 | 2.447227  |
| C  | 1.002503  | 1.732104  | -2.174009 |
| C  | 2.055393  | 2.626250  | -2.324997 |
| C  | -0.272891 | 2.150821  | -1.720760 |
| C  | 1.891861  | 3.984711  | -2.027517 |
| C  | -0.420114 | 3.527126  | -1.449904 |
| C  | 0.643074  | 4.422856  | -1.592071 |
| C  | -1.342390 | 1.150876  | -1.487577 |
| C  | -2.794752 | 1.649120  | -1.445731 |
| H  | 0.484433  | 5.481130  | -1.365637 |
| H  | -1.386636 | 3.911939  | -1.116747 |
| H  | 2.720392  | 4.687379  | -2.144258 |
| H  | 3.020787  | 2.257200  | -2.683722 |
| H  | 1.181053  | 0.672890  | -2.383141 |
| Cu | -0.745883 | 0.246093  | 0.242754  |
| H  | -3.150327 | 1.969099  | -2.446343 |
| H  | -2.900066 | 2.526793  | -0.787600 |
| H  | -1.254800 | 0.349948  | -2.237014 |
| H  | 5.574819  | 0.539135  | -0.033893 |
| H  | 4.111874  | 0.863060  | -1.019018 |
| H  | 5.449779  | -0.130008 | -1.687453 |
| C  | 4.822866  | -4.055677 | -0.550173 |
| H  | 5.453065  | -4.722622 | -1.151361 |
| H  | 4.151019  | -4.657452 | 0.079234  |
| H  | 5.464925  | -3.431229 | 0.089090  |
| H  | 3.659146  | 2.801665  | 1.011561  |
| H  | 4.847819  | 1.703412  | 2.911736  |
| C  | 3.105225  | 2.185738  | 1.723887  |
| H  | 1.239105  | 2.488402  | 0.705070  |
| C  | 3.770867  | 1.570466  | 2.785918  |
| C  | 1.733522  | 2.014132  | 1.557182  |
| C  | 3.049788  | 0.783964  | 3.684300  |
| C  | 0.996348  | 1.220762  | 2.454389  |
| H  | 3.559484  | 0.298440  | 4.519983  |
| C  | 1.677420  | 0.610533  | 3.517754  |
| C  | -0.453282 | 0.978989  | 2.289114  |

|   |           |           |          |
|---|-----------|-----------|----------|
| H | 1.120001  | -0.016425 | 4.219063 |
| H | -0.886802 | 0.231447  | 2.961669 |
| H | -0.946110 | 2.682743  | 1.057570 |
| C | -1.294827 | 1.762845  | 1.535875 |
| H | -2.378106 | 1.630583  | 1.606854 |

75

Figure 4\_para-H\_ts(AS)\_01 / electronic energy: -3508.73604808 a.u. / lowest freq: -180.59 cm-1

|    |           |           |           |
|----|-----------|-----------|-----------|
| C  | 0.717243  | -0.773795 | -0.570214 |
| C  | 0.701234  | -1.231357 | 0.781221  |
| C  | 1.620391  | -0.751237 | 1.704458  |
| O  | 3.478301  | -1.915355 | 1.549176  |
| P  | 4.134614  | -1.468246 | 0.252179  |
| O  | 3.889255  | -0.094400 | -0.298946 |
| O  | 5.730437  | -1.751910 | 0.459807  |
| O  | 3.744389  | -2.522773 | -0.941799 |
| C  | 6.623170  | -1.358621 | -0.559100 |
| H  | 0.026991  | -1.207288 | -1.299166 |
| H  | 1.665665  | -0.398983 | -0.967704 |
| H  | -0.041514 | -1.966886 | 1.104354  |
| H  | 2.279651  | 0.079319  | 1.447158  |
| H  | 1.551101  | -1.034222 | 2.754501  |
| B  | -2.382885 | 0.533561  | -1.804899 |
| O  | -3.424120 | 0.159961  | -1.000660 |
| O  | -2.034311 | -0.445708 | -2.696452 |
| C  | -3.682386 | -1.241518 | -1.222194 |
| C  | -3.039499 | -1.477714 | -2.640696 |
| C  | -5.180287 | -1.487956 | -1.148674 |
| C  | -2.973840 | -2.008707 | -0.109088 |
| C  | -4.012130 | -1.217745 | -3.789281 |
| C  | -2.372361 | -2.832190 | -2.816676 |
| H  | -4.513061 | -0.244095 | -3.681462 |
| H  | -4.780803 | -2.001005 | -3.853076 |
| H  | -3.453300 | -1.206790 | -4.736481 |
| H  | -1.560635 | -2.987775 | -2.093915 |
| H  | -1.944001 | -2.908934 | -3.826943 |
| H  | -3.107016 | -3.642646 | -2.696773 |
| H  | -1.888081 | -1.849592 | -0.145771 |
| H  | -3.167204 | -3.088809 | -0.174185 |
| H  | -3.339013 | -1.650439 | 0.863010  |
| H  | -5.412170 | -2.533676 | -1.400228 |
| H  | -5.738881 | -0.830562 | -1.827493 |
| H  | -5.535203 | -1.299751 | -0.124596 |
| C  | 2.075834  | 2.726166  | -0.876565 |
| C  | 2.887881  | 3.818175  | -0.585243 |
| C  | 0.686359  | 2.884425  | -1.065751 |
| C  | 2.344208  | 5.101729  | -0.476822 |
| C  | 0.157430  | 4.181705  | -0.961601 |
| C  | 0.975273  | 5.275177  | -0.670841 |
| C  | -0.168861 | 1.687887  | -1.329852 |
| C  | -1.635782 | 1.909749  | -1.686749 |
| H  | 0.533322  | 6.272348  | -0.596194 |
| H  | -0.912001 | 4.345544  | -1.108481 |
| H  | 2.983722  | 5.956645  | -0.244358 |
| H  | 3.959487  | 3.662169  | -0.435870 |
| H  | 2.532306  | 1.731240  | -0.925348 |
| Cu | -0.065749 | 0.733555  | 0.455293  |
| H  | -1.711368 | 2.452869  | -2.650194 |
| H  | -2.153456 | 2.531824  | -0.939850 |
| H  | 0.307195  | 1.076298  | -2.105081 |
| H  | 7.643567  | -1.590341 | -0.221834 |
| H  | 6.549675  | -0.278037 | -0.763211 |
| H  | 6.433865  | -1.903023 | -1.500637 |
| C  | 3.779993  | -3.905106 | -0.675009 |
| H  | 3.477892  | -4.434665 | -1.590239 |
| H  | 3.089297  | -4.176899 | 0.140216  |
| H  | 4.793715  | -4.241493 | -0.395465 |
| H  | -5.303500 | 0.363368  | 2.543311  |
| H  | -4.964840 | -1.801921 | 3.726447  |
| C  | -4.295777 | 0.037562  | 2.810440  |
| H  | -3.374561 | 1.789017  | 1.974818  |
| C  | -4.106277 | -1.175604 | 3.473519  |
| C  | -3.204702 | 0.839370  | 2.485269  |
| C  | -2.815934 | -1.584651 | 3.812853  |
| C  | -1.904047 | 0.444374  | 2.832015  |
| H  | -2.658306 | -2.533568 | 4.330140  |
| C  | -1.725626 | -0.778574 | 3.496809  |
| C  | -0.718270 | 1.286111  | 2.553013  |
| H  | -0.715706 | -1.096396 | 3.769350  |
| H  | 0.164129  | 1.060795  | 3.160161  |
| H  | 0.215216  | 3.010950  | 1.727172  |
| C  | -0.674025 | 2.375828  | 1.737110  |
| H  | -1.557089 | 2.758795  | 1.219099  |

75

Figure 4\_para-H\_ts(AS)\_02 / electronic energy: -3508.73603238 a.u. / lowest freq: -178.40 cm-1

|   |           |           |           |
|---|-----------|-----------|-----------|
| C | -0.682013 | -1.444171 | -1.355671 |
| C | -0.324901 | -2.497474 | -0.464381 |
| C | 0.639454  | -2.318536 | 0.507844  |
| O | 2.629359  | -3.105650 | -0.271734 |
| P | 3.440379  | -1.928030 | -0.773046 |
| O | 2.919933  | -0.981243 | -1.808455 |
| O | 3.851421  | -1.098722 | 0.594843  |
| O | 4.900153  | -2.463417 | -1.287864 |
| C | 4.687142  | 0.027459  | 0.484988  |
| H | -1.412728 | -1.650857 | -2.140344 |
| H | 0.047180  | -0.656063 | -1.577715 |
| H | -0.864271 | -3.448806 | -0.505450 |
| H | 1.149465  | -1.361643 | 0.632093  |

|    |           |           |           |
|----|-----------|-----------|-----------|
| H  | 0.797671  | -3.064441 | 1.284888  |
| B  | -1.049319 | 1.934329  | -1.683393 |
| O  | 0.181936  | 1.477206  | -2.064025 |
| O  | -0.980937 | 3.152111  | -1.061900 |
| C  | 1.170845  | 2.296100  | -1.407090 |
| C  | 0.377379  | 3.632214  | -1.201483 |
| C  | 2.403852  | 2.377449  | -2.289107 |
| C  | 1.517417  | 1.599800  | -0.092552 |
| C  | 0.412388  | 4.537053  | -2.430766 |
| C  | 0.762385  | 4.413391  | 0.041664  |
| H  | 0.168676  | 3.981265  | -3.348614 |
| H  | 1.400971  | 5.001519  | -2.558729 |
| H  | -0.331430 | 5.338726  | -2.310952 |
| H  | 0.582340  | 3.831794  | 0.953935  |
| H  | 0.172330  | 5.340144  | 0.103039  |
| H  | 1.827203  | 4.689544  | 0.006791  |
| H  | 0.634875  | 1.513396  | 0.560388  |
| H  | 2.296086  | 2.144764  | 0.459546  |
| H  | 1.902409  | 0.598680  | -0.331734 |
| H  | 3.154677  | 3.049666  | -1.845766 |
| H  | 2.160978  | 2.741370  | -3.296696 |
| H  | 2.833520  | 1.367093  | -2.372205 |
| C  | -4.832780 | -0.577898 | 0.457938  |
| C  | -5.953882 | -1.404505 | 0.451549  |
| C  | -3.963834 | -0.504489 | -0.648591 |
| C  | -6.249142 | -2.181564 | -0.669520 |
| C  | -4.287168 | -1.286666 | -1.773556 |
| C  | -5.409626 | -2.112456 | -1.782410 |
| C  | -2.746304 | 0.355729  | -0.597505 |
| C  | -2.366919 | 1.099847  | -1.878819 |
| H  | -5.633020 | -2.706106 | -2.672650 |
| H  | -3.649078 | -1.249800 | -2.659756 |
| H  | -7.128795 | -2.829436 | -0.678662 |
| H  | -6.608990 | -1.433181 | 1.326182  |
| H  | -4.626716 | 0.037329  | 1.338418  |
| Cu | -1.484306 | -0.893406 | 0.367035  |
| H  | -3.202311 | 1.767282  | -2.162641 |
| H  | -2.219551 | 0.408633  | -2.722817 |
| H  | -2.850962 | 1.085637  | 0.220875  |
| H  | 4.642915  | 0.583115  | 1.433595  |
| H  | 4.369440  | 0.696010  | -0.332092 |
| H  | 5.736640  | -0.262916 | 0.300210  |
| C  | 5.579733  | -3.438663 | -0.533939 |
| H  | 6.562089  | -3.603051 | -1.000676 |
| H  | 5.029684  | -4.393926 | -0.514994 |
| H  | 5.739867  | -3.114489 | 0.509529  |
| H  | 2.659745  | 0.205676  | 3.684732  |
| H  | 2.448481  | 2.684128  | 3.865540  |
| C  | 1.698334  | 0.689928  | 3.501839  |
| H  | 0.702164  | -1.169201 | 3.110834  |
| C  | 1.578962  | 2.077866  | 3.601456  |
| C  | 0.591800  | -0.085038 | 3.171154  |
| C  | 0.347103  | 2.686154  | 3.364924  |
| C  | -0.650029 | 0.517757  | 2.913155  |
| H  | 0.244639  | 3.769945  | 3.449422  |
| C  | -0.756658 | 1.912615  | 3.011794  |
| C  | -1.847854 | -0.256654 | 2.531189  |
| H  | -1.717098 | 2.394166  | 2.810607  |
| H  | -2.754433 | 0.338865  | 2.387988  |
| H  | -2.921234 | -2.070531 | 2.241071  |
| C  | -1.951589 | -1.608577 | 2.449611  |
| H  | -1.137160 | -2.279027 | 2.732232  |

75

Figure 4 para-H\_ts(AS)\_03 / electronic energy: -3508.73783576 a.u. / lowest freq: -216.07 cm-1

|   |           |           |           |
|---|-----------|-----------|-----------|
| C | -0.548225 | -1.487136 | -0.812942 |
| C | -0.230365 | -1.885670 | 0.517694  |
| C | 0.975594  | -1.531499 | 1.102433  |
| O | 2.498311  | -2.965804 | 0.421521  |
| P | 3.232484  | -2.220860 | -0.682667 |
| O | 2.499961  | -1.544196 | -1.801768 |
| O | 4.167076  | -1.130512 | 0.117151  |
| O | 4.341441  | -3.216268 | -1.348779 |
| C | 4.817030  | -0.116385 | -0.611930 |
| H | -1.494451 | -1.812253 | -1.252239 |
| H | 0.296227  | -1.336780 | -1.496330 |
| H | -0.940383 | -2.483411 | 1.096891  |
| H | 1.623114  | -0.782999 | 0.646165  |
| H | 1.184070  | -1.775065 | 2.143919  |
| B | -3.663118 | 0.478440  | -0.777567 |
| O | -4.357037 | 0.683412  | 0.386762  |
| O | -3.821359 | -0.791545 | -1.259952 |
| C | -4.832027 | -0.594934 | 0.851848  |
| C | -4.829576 | -1.452605 | -0.469494 |
| C | -6.196927 | -0.419310 | 1.495821  |
| C | -3.820352 | -1.087101 | 1.884534  |
| C | -6.140582 | -1.359216 | -1.246726 |
| C | -4.433659 | -2.907839 | -0.279358 |
| H | -6.446414 | -0.313112 | -1.396519 |
| H | -6.954699 | -1.891060 | -0.733851 |
| H | -6.002679 | -1.816852 | -2.237271 |
| H | -3.423159 | -3.007065 | 0.138719  |
| H | -4.451996 | -3.428101 | -1.248220 |
| H | -5.140613 | -3.416188 | 0.393328  |
| H | -2.823138 | -1.203211 | 1.434751  |
| H | -4.118059 | -2.049711 | 2.323250  |
| H | -3.745077 | -0.349650 | 2.697480  |
| H | -6.622279 | -1.395041 | 1.774460  |

|    |           |           |           |
|----|-----------|-----------|-----------|
| H  | -6.900067 | 0.091642  | 0.825669  |
| H  | -6.101615 | 0.181958  | 2.411934  |
| C  | 1.097088  | 1.553068  | -2.139383 |
| C  | 2.145349  | 2.443481  | -2.348214 |
| C  | -0.188084 | 2.010570  | -1.774866 |
| C  | 1.955774  | 3.819334  | -2.191426 |
| C  | -0.362377 | 3.398314  | -1.631153 |
| C  | 0.694226  | 4.288939  | -1.832190 |
| C  | -1.289902 | 1.028315  | -1.536910 |
| C  | -2.717756 | 1.560403  | -1.410258 |
| H  | 0.522643  | 5.361679  | -1.711407 |
| H  | -1.342347 | 3.800043  | -1.367154 |
| H  | 2.781587  | 4.516213  | -2.352655 |
| H  | 3.126211  | 2.055221  | -2.634638 |
| H  | 1.299178  | 0.481185  | -2.232369 |
| Cu | -0.708318 | 0.196411  | 0.229137  |
| H  | -3.093326 | 1.872594  | -2.404431 |
| H  | -2.767286 | 2.452302  | -0.768127 |
| H  | -1.256872 | 0.262321  | -2.319027 |
| H  | 5.523069  | 0.387920  | 0.063784  |
| H  | 4.100562  | 0.627481  | -0.996246 |
| H  | 5.386757  | -0.523611 | -1.465198 |
| C  | 5.155507  | -4.003672 | -0.508718 |
| H  | 5.798795  | -4.624978 | -1.148394 |
| H  | 4.550285  | -4.660914 | 0.136596  |
| H  | 5.797373  | -3.377371 | 0.134825  |
| H  | 3.551077  | 3.277792  | 0.675555  |
| H  | 4.958099  | 2.213090  | 2.440025  |
| C  | 3.097200  | 2.615262  | 1.416028  |
| H  | 1.136230  | 2.831836  | 0.571933  |
| C  | 3.883793  | 2.018872  | 2.402899  |
| C  | 1.729257  | 2.365287  | 1.361509  |
| C  | 3.293892  | 1.167542  | 3.336668  |
| C  | 1.125954  | 1.505941  | 2.293380  |
| H  | 3.903078  | 0.693380  | 4.109250  |
| C  | 1.926140  | 0.912038  | 3.279621  |
| C  | -0.317213 | 1.179430  | 2.254425  |
| H  | 1.469444  | 0.233720  | 4.005315  |
| H  | -0.645067 | 0.418479  | 2.970867  |
| H  | -1.021721 | 2.718018  | 0.930415  |
| C  | -1.264544 | 1.830734  | 1.521023  |
| H  | -2.325456 | 1.601603  | 1.656409  |

75

Figure 4 para-H<sub>ts</sub>(AS)<sub>04</sub> / electronic energy: -3508.73372533 a.u. / lowest freq: -167.66 cm<sup>-1</sup>

|    |           |           |           |
|----|-----------|-----------|-----------|
| C  | -0.926706 | -1.592200 | -1.257863 |
| C  | -0.414296 | -2.522846 | -0.316061 |
| C  | 0.672441  | -2.215002 | 0.481842  |
| O  | 2.524444  | -3.079300 | -0.442179 |
| P  | 3.399560  | -1.926894 | -0.897031 |
| O  | 2.903908  | -0.867693 | -1.829413 |
| O  | 3.939296  | -1.247017 | 0.505816  |
| O  | 4.786680  | -2.524105 | -1.529270 |
| C  | 4.779058  | -0.120643 | 0.431690  |
| H  | -1.751707 | -1.895057 | -1.905177 |
| H  | -0.270421 | -0.802622 | -1.646260 |
| H  | -0.931712 | -3.474949 | -0.163215 |
| H  | 1.157538  | -1.240453 | 0.413479  |
| H  | 0.949598  | -2.850382 | 1.320390  |
| B  | -1.341310 | 1.832285  | -1.678962 |
| O  | -0.116891 | 1.412279  | -2.120315 |
| O  | -1.289526 | 3.068933  | -1.096471 |
| C  | 0.877022  | 2.304469  | -1.573151 |
| C  | 0.032873  | 3.605294  | -1.323089 |
| C  | 2.020732  | 2.438850  | -2.563096 |
| C  | 1.386763  | 1.666648  | -0.285228 |
| C  | -0.046640 | 4.505541  | -2.553364 |
| C  | 0.453417  | 4.411661  | -0.106634 |
| H  | -0.332460 | 3.937775  | -3.451526 |
| H  | 0.915128  | 5.001840  | -2.747290 |
| H  | -0.807306 | 5.282628  | -2.386164 |
| H  | 0.364031  | 3.825933  | 0.816919  |
| H  | -0.183699 | 5.303501  | -0.010602 |
| H  | 1.496427  | 4.748067  | -0.206722 |
| H  | 0.573342  | 1.525932  | 0.443776  |
| H  | 2.159254  | 2.287513  | 0.189823  |
| H  | 1.834128  | 0.694444  | -0.540357 |
| H  | 2.749829  | 3.184612  | -2.210570 |
| H  | 1.666651  | 2.738635  | -3.558533 |
| H  | 2.528090  | 1.465657  | -2.644161 |
| C  | -4.949496 | -0.664776 | 0.762896  |
| C  | -6.057023 | -1.506366 | 0.835563  |
| C  | -4.129157 | -0.621140 | -0.381729 |
| C  | -6.390056 | -2.329090 | -0.241688 |
| C  | -4.495864 | -1.443350 | -1.463709 |
| C  | -5.604247 | -2.285724 | -1.393689 |
| C  | -2.928788 | 0.266033  | -0.423714 |
| C  | -2.635636 | 0.947320  | -1.763837 |
| H  | -5.858918 | -2.911718 | -2.252960 |
| H  | -3.908112 | -1.423517 | -2.384242 |
| H  | -7.258326 | -2.989955 | -0.187827 |
| H  | -6.671549 | -1.512280 | 1.739724  |
| H  | -4.716549 | -0.013305 | 1.609244  |
| Cu | -1.477824 | -0.812908 | 0.478792  |
| H  | -3.504089 | 1.572249  | -2.046362 |
| H  | -2.504688 | 0.213468  | -2.573731 |
| H  | -3.024042 | 1.039010  | 0.355702  |
| H  | 5.237800  | 0.030584  | 1.420265  |

|   |           |           |           |
|---|-----------|-----------|-----------|
| H | 4.222412  | 0.790116  | 0.155062  |
| H | 5.591023  | -0.264136 | -0.302336 |
| C | 5.449952  | -3.575778 | -0.869234 |
| H | 6.416345  | -3.733522 | -1.370344 |
| H | 4.870416  | -4.512840 | -0.912657 |
| H | 5.642922  | -3.337799 | 0.191466  |
| H | 0.467919  | 3.757761  | 3.448279  |
| H | 2.892734  | 3.191039  | 3.394262  |
| C | 0.784445  | 2.722841  | 3.302120  |
| H | -1.230364 | 1.993907  | 3.172044  |
| C | 2.143856  | 2.404430  | 3.277273  |
| C | -0.172192 | 1.725365  | 3.144019  |
| C | 2.541764  | 1.079501  | 3.105900  |
| C | 0.217267  | 0.387223  | 2.969614  |
| H | 3.602447  | 0.822510  | 3.084094  |
| C | 1.585532  | 0.077642  | 2.960084  |
| C | -0.764602 | -0.702232 | 2.802692  |
| H | 1.908446  | -0.956640 | 2.824349  |
| H | -0.371913 | -1.712648 | 2.949735  |
| H | -2.579837 | 0.423574  | 2.571644  |
| C | -2.097266 | -0.556233 | 2.584950  |
| H | -2.752947 | -1.432000 | 2.605400  |

75

Figure 4 para-H\_pi-allyl\_01 / electronic energy: -3508.74217018 a.u. / lowest freq: 25.81 cm-1

|    |           |           |           |
|----|-----------|-----------|-----------|
| C  | 0.584876  | -0.947588 | 0.034822  |
| C  | 0.359625  | -0.992681 | 1.463346  |
| C  | 1.169295  | -0.309208 | 2.322865  |
| O  | 4.169687  | -1.706519 | 2.319008  |
| P  | 4.220324  | -1.403243 | 0.856574  |
| O  | 3.644349  | -0.136425 | 0.271491  |
| O  | 5.788811  | -1.556938 | 0.379425  |
| O  | 3.509223  | -2.622576 | -0.007567 |
| C  | 6.120359  | -1.249057 | -0.950704 |
| H  | -0.085972 | -1.512481 | -0.616083 |
| H  | 1.629224  | -0.860693 | -0.289129 |
| H  | -0.562268 | -1.446640 | 1.844418  |
| H  | 2.119549  | 0.107393  | 1.966421  |
| H  | 0.941503  | -0.261611 | 3.390269  |
| B  | -2.271881 | -0.161249 | -1.744424 |
| O  | -3.436227 | -0.289242 | -1.044238 |
| O  | -1.866101 | -1.338517 | -2.311404 |
| C  | -3.744906 | -1.696054 | -0.950349 |
| C  | -2.937419 | -2.294865 | -2.161639 |
| C  | -5.250458 | -1.881789 | -1.030700 |
| C  | -3.225721 | -2.177506 | 0.401151  |
| C  | -3.728064 | -2.290651 | -3.467735 |
| C  | -2.341819 | -3.670682 | -1.912422 |
| H  | -4.184186 | -1.308286 | -3.661131 |
| H  | -4.523438 | -3.049343 | -3.457304 |
| H  | -3.046005 | -2.518663 | -4.299775 |
| H  | -1.626203 | -3.662207 | -1.079872 |
| H  | -1.810027 | -4.014474 | -2.811690 |
| H  | -3.133861 | -4.399968 | -1.685996 |
| H  | -2.132101 | -2.091199 | 0.458093  |
| H  | -3.497276 | -3.225744 | 0.589823  |
| H  | -3.659071 | -1.555385 | 1.196966  |
| H  | -5.504903 | -2.951900 | -1.059958 |
| H  | -5.675135 | -1.396415 | -1.918992 |
| H  | -5.726944 | -1.443481 | -0.141219 |
| C  | 2.255017  | 2.148523  | -1.393828 |
| C  | 3.093061  | 3.252436  | -1.528070 |
| C  | 0.878191  | 2.254839  | -1.674139 |
| C  | 2.586386  | 4.483948  | -1.949734 |
| C  | 0.380642  | 3.499119  | -2.095560 |
| C  | 1.226370  | 4.599422  | -2.234737 |
| C  | -0.006328 | 1.056909  | -1.514275 |
| C  | -1.472470 | 1.182930  | -1.896444 |
| H  | 0.816240  | 5.554986  | -2.571487 |
| H  | -0.680836 | 3.615502  | -2.322416 |
| H  | 3.247832  | 5.347301  | -2.054322 |
| H  | 4.155956  | 3.146641  | -1.296125 |
| H  | 2.676415  | 1.207313  | -1.019676 |
| Cu | 0.113765  | 0.921924  | 0.508013  |
| H  | -1.529241 | 1.469126  | -2.966520 |
| H  | -1.982946 | 1.985597  | -1.342041 |
| H  | 0.450162  | 0.204095  | -2.025810 |
| H  | 7.189337  | -1.465211 | -1.097976 |
| H  | 5.940279  | -0.185095 | -1.179856 |
| H  | 5.541153  | -1.856481 | -1.668949 |
| C  | 3.786199  | -3.950423 | 0.355550  |
| H  | 3.155875  | -4.613176 | -0.256775 |
| H  | 3.569315  | -4.132904 | 1.421543  |
| H  | 4.844273  | -4.211724 | 0.172567  |
| H  | -5.299594 | 1.508563  | 1.338146  |
| H  | -5.459885 | -0.137080 | 3.200231  |
| C  | -4.419691 | 1.277078  | 1.941749  |
| H  | -3.159768 | 2.629403  | 0.848110  |
| C  | -4.508766 | 0.355337  | 2.985302  |
| C  | -3.209230 | 1.903138  | 1.661793  |
| C  | -3.379233 | 0.060507  | 3.750242  |
| C  | -2.066992 | 1.617096  | 2.424286  |
| H  | -3.441511 | -0.662933 | 4.566071  |
| C  | -2.168535 | 0.689333  | 3.472480  |
| C  | -0.761310 | 2.262404  | 2.166108  |
| H  | -1.282266 | 0.457497  | 4.068643  |
| H  | -0.022917 | 2.175100  | 2.969528  |
| H  | 0.520780  | 3.522124  | 1.025546  |



|   |           |          |          |
|---|-----------|----------|----------|
| C | -0.440099 | 3.003140 | 1.073960 |
| H | -1.167986 | 3.239364 | 0.294250 |

75

Figure 4 para-H\_pi-allyl\_02 / electronic energy: -3508.74606185 a.u. / lowest freq: 24.74 cm-1

|    |           |           |           |
|----|-----------|-----------|-----------|
| C  | -0.700038 | -1.696972 | -0.407138 |
| C  | -0.645462 | -1.797394 | 1.027550  |
| C  | 0.427347  | -1.315448 | 1.724674  |
| O  | 2.720884  | -3.891467 | 0.470763  |
| P  | 3.095124  | -2.698358 | -0.344702 |
| O  | 2.160691  | -2.052696 | -1.336825 |
| O  | 3.606187  | -1.543443 | 0.732714  |
| O  | 4.490494  | -2.965083 | -1.180914 |
| C  | 4.050855  | -0.303254 | 0.242765  |
| H  | -1.623951 | -2.001368 | -0.901883 |
| H  | 0.253700  | -1.841269 | -0.943835 |
| H  | -1.547221 | -2.086788 | 1.577844  |
| H  | 1.376856  | -1.088639 | 1.224551  |
| H  | 0.416339  | -1.279804 | 2.816373  |
| B  | -3.552105 | 0.333731  | -0.905505 |
| O  | -4.323760 | 0.880403  | 0.084139  |
| O  | -3.777364 | -1.002727 | -1.068470 |
| C  | -4.969597 | -0.195857 | 0.793807  |
| C  | -4.906345 | -1.375230 | -0.251642 |
| C  | -6.376136 | 0.226535  | 1.184140  |
| C  | -4.131788 | -0.449265 | 2.043968  |
| C  | -6.121820 | -1.427117 | -1.174011 |
| C  | -4.645845 | -2.744303 | 0.354668  |
| H  | -6.323337 | -0.446734 | -1.630607 |
| H  | -7.023000 | -1.755985 | -0.637465 |
| H  | -5.924129 | -2.143448 | -1.984730 |
| H  | -3.685968 | -2.778997 | 0.887047  |
| H  | -4.620307 | -3.504946 | -0.439237 |
| H  | -5.446721 | -3.014699 | 1.058920  |
| H  | -3.094506 | -0.696386 | 1.777393  |
| H  | -4.540832 | -1.264235 | 2.656983  |
| H  | -4.113703 | 0.463610  | 2.657692  |
| H  | -6.912953 | -0.613734 | 1.649476  |
| H  | -6.953478 | 0.575858  | 0.318708  |
| H  | -6.330346 | 1.045445  | 1.916907  |
| C  | 1.359415  | 0.922342  | -2.117663 |
| C  | 2.449380  | 1.728621  | -2.437599 |
| C  | 0.060349  | 1.464535  | -2.042057 |
| C  | 2.278811  | 3.089493  | -2.695301 |
| C  | -0.096551 | 2.837255  | -2.305038 |
| C  | 0.998257  | 3.637698  | -2.631031 |
| C  | -1.094776 | 0.577990  | -1.691075 |
| C  | -2.497611 | 1.170146  | -1.716844 |
| H  | 0.844622  | 4.699725  | -2.838009 |
| H  | -1.087771 | 3.292365  | -2.271853 |
| H  | 3.136804  | 3.717483  | -2.946868 |
| H  | 3.446035  | 1.282701  | -2.480243 |
| H  | 1.538442  | -0.139756 | -1.905543 |
| Cu | -0.543297 | 0.198677  | 0.227798  |
| H  | -2.831810 | 1.250968  | -2.769463 |
| H  | -2.514593 | 2.190732  | -1.309316 |
| H  | -1.052136 | -0.330699 | -2.298271 |
| H  | 4.769581  | 0.116903  | 0.962965  |
| H  | 3.219854  | 0.414423  | 0.128657  |
| H  | 4.560001  | -0.402560 | -0.730784 |
| C  | 5.568789  | -3.562342 | -0.506900 |
| H  | 6.333996  | -3.832533 | -1.250005 |
| H  | 5.254981  | -4.473187 | 0.029985  |
| H  | 6.024587  | -2.872026 | 0.226490  |
| H  | 3.539620  | 3.929244  | 0.239880  |
| H  | 4.985135  | 3.107840  | 2.099804  |
| C  | 3.122212  | 3.285735  | 1.017461  |
| H  | 1.166703  | 3.290718  | 0.134018  |
| C  | 3.930820  | 2.825143  | 2.058040  |
| C  | 1.779280  | 2.926917  | 0.961340  |
| C  | 3.391606  | 1.991803  | 3.037500  |
| C  | 1.222795  | 2.098537  | 1.947939  |
| H  | 4.020926  | 1.618590  | 3.848275  |
| C  | 2.048234  | 1.629069  | 2.980167  |
| C  | -0.204729 | 1.714881  | 1.950414  |
| H  | 1.628808  | 0.974008  | 3.748053  |
| H  | -0.525306 | 1.125066  | 2.815388  |
| H  | -0.929881 | 2.850933  | 0.279177  |
| C  | -1.155953 | 2.134186  | 1.072017  |
| H  | -2.211835 | 1.904141  | 1.243265  |

37

Figure 4 para-CO2Me\_L-Cu-OtBu / electronic energy: -2410.19525632 a.u. / lowest freq: 22.92 cm-1

|   |          |           |           |
|---|----------|-----------|-----------|
| O | 4.336955 | 0.759818  | 1.270722  |
| C | 3.813648 | 0.295280  | 0.286819  |
| H | 6.377229 | 0.525856  | -0.503619 |
| H | 5.509179 | 2.083275  | -0.668008 |
| O | 4.342290 | 0.376550  | -0.932416 |
| C | 5.585015 | 1.055967  | -1.052360 |
| H | 5.822111 | 1.073396  | -2.122151 |
| C | 0.010075 | -1.714613 | 0.394777  |
| C | 0.582229 | -1.171455 | 1.554508  |
| C | 0.718612 | -1.618072 | -0.813666 |
| C | 1.948488 | -0.976825 | -0.864820 |
| C | 2.504190 | -0.423182 | 0.295604  |
| C | 1.815193 | -0.531701 | 1.506735  |
| H | 0.301415 | -2.034699 | -1.732230 |
| H | 2.481274 | -0.897947 | -1.812852 |
| H | 2.252815 | -0.101531 | 2.409225  |

|    |           |           |           |
|----|-----------|-----------|-----------|
| H  | 0.045094  | -1.242163 | 2.503364  |
| C  | -1.342937 | -2.314111 | 0.481494  |
| C  | -2.079671 | -2.809549 | -0.567100 |
| H  | -1.717994 | -2.466818 | 1.500272  |
| H  | -1.687861 | -2.868343 | -1.587441 |
| H  | -2.998795 | -3.367964 | -0.366085 |
| H  | -2.944270 | 1.978775  | 2.074160  |
| H  | -1.417812 | 2.872316  | 1.807937  |
| C  | -2.008539 | 1.995866  | 1.492595  |
| H  | -1.435711 | 1.088443  | 1.750046  |
| H  | -4.066576 | 3.290377  | 0.191900  |
| C  | -3.113534 | 3.274596  | -0.360508 |
| H  | -2.555499 | 4.193638  | -0.116482 |
| Cu | -2.537132 | -0.824824 | -0.280275 |
| O  | -3.124385 | 0.907277  | -0.332852 |
| C  | -2.331382 | 1.997552  | -0.012765 |
| H  | -3.349866 | 3.287741  | -1.436568 |
| C  | -1.010162 | 1.982770  | -0.803870 |
| H  | -0.408892 | 1.098739  | -0.528849 |
| H  | -0.393737 | 2.878382  | -0.618903 |
| H  | -1.221520 | 1.924120  | -1.884025 |

79

Figure 4 para-CO2Me\_ed / electronic energy: -3231.96398916 a.u. / lowest freq: 15.21 cm<sup>-1</sup>

|    |           |           |           |
|----|-----------|-----------|-----------|
| H  | 0.420682  | -3.251735 | -2.320503 |
| H  | -0.175830 | -3.471261 | -0.650799 |
| O  | 1.955117  | -1.819943 | -0.653003 |
| C  | 0.630249  | -3.729857 | -1.350328 |
| H  | 0.640391  | -4.819753 | -1.505728 |
| C  | 1.975125  | -3.245229 | -0.807090 |
| H  | 2.877977  | -2.986213 | -2.760945 |
| H  | 1.449595  | -3.770970 | 1.228008  |
| C  | 3.084590  | -3.519002 | -1.818846 |
| C  | 2.284444  | -3.911866 | 0.529255  |
| H  | 4.053468  | -3.167625 | -1.432714 |
| H  | 3.165145  | -4.594057 | -2.040137 |
| H  | 3.191858  | -3.483655 | 0.978429  |
| H  | 2.438577  | -4.992884 | 0.390597  |
| Cu | 0.959252  | -0.450176 | -1.751397 |
| H  | 1.688894  | 3.331223  | 2.550758  |
| H  | 4.062624  | 3.209383  | 2.003339  |
| H  | 3.211415  | 1.635152  | 2.125613  |
| C  | 3.811369  | 2.281009  | 1.469953  |
| H  | 2.017490  | 4.823225  | 1.631737  |
| H  | 4.747827  | 1.749614  | 1.245316  |
| C  | 1.414832  | 3.902195  | 1.654494  |
| H  | 0.357324  | 4.191254  | 1.748279  |
| C  | 1.614663  | 3.096669  | 0.379835  |
| C  | 3.074105  | 2.560251  | 0.161475  |
| O  | 0.852524  | 1.881477  | 0.464377  |
| H  | 4.072080  | 4.421708  | -0.335553 |
| B  | 1.567401  | 0.853709  | -0.118499 |
| H  | 4.930401  | 2.954623  | -0.863795 |
| C  | 3.936242  | 3.413343  | -0.755669 |
| O  | 2.836693  | 1.286292  | -0.461300 |
| H  | 1.573778  | 4.852979  | -0.927776 |
| C  | 1.074600  | 3.879490  | -0.816498 |
| H  | 0.000704  | 4.063223  | -0.665995 |
| H  | 3.498791  | 3.508262  | -1.758384 |
| H  | 1.197716  | 3.315218  | -1.752992 |
| H  | -0.546745 | -3.306409 | 2.554131  |
| H  | 1.531925  | -2.994349 | 3.125422  |
| H  | -2.069415 | -2.529581 | 2.071316  |
| C  | -1.129676 | -2.378206 | 2.624370  |
| O  | -0.033393 | -1.504611 | 0.698049  |
| H  | 0.892351  | -2.118771 | 4.540081  |
| C  | 1.515113  | -2.025026 | 3.637865  |
| H  | -1.384286 | -2.206040 | 3.681228  |
| B  | 1.275630  | -1.018536 | 0.389143  |
| H  | 2.544255  | -1.799802 | 3.956289  |
| C  | -0.380969 | -1.186436 | 2.030491  |
| C  | 1.026437  | -0.896428 | 2.726834  |
| O  | 1.943970  | -0.794526 | 1.641596  |
| H  | -2.219308 | -0.249259 | 1.421576  |
| C  | -1.328214 | 0.019000  | 2.009226  |
| H  | -1.662159 | 0.300392  | 3.019356  |
| H  | -0.859327 | 0.888196  | 1.531404  |
| H  | 0.309578  | 0.379686  | 4.344007  |
| C  | 1.047937  | 0.404716  | 3.528356  |
| H  | 2.041818  | 0.545378  | 3.980875  |
| H  | 0.836211  | 1.267423  | 2.886840  |
| H  | -1.480762 | 2.670109  | -1.934889 |
| H  | -3.551039 | 2.762847  | -0.560174 |
| H  | 0.138588  | 1.498410  | -3.193718 |
| C  | -2.050555 | 1.758400  | -1.744805 |
| C  | -3.204757 | 1.814283  | -0.974125 |
| C  | -0.317129 | 0.516744  | -3.021337 |
| O  | -5.577960 | 1.782225  | 0.600505  |
| C  | -1.593258 | 0.539761  | -2.265238 |
| H  | 1.066895  | -0.445687 | -4.344669 |
| C  | 0.218282  | -0.579980 | -3.667465 |
| C  | -3.926334 | 0.648284  | -0.702746 |
| C  | -5.128814 | 0.745085  | 0.174689  |
| C  | -2.335732 | -0.622660 | -2.005270 |
| H  | -0.317333 | -1.530799 | -3.743457 |
| C  | -3.485958 | -0.571457 | -1.231013 |
| H  | -7.650876 | 0.053593  | 0.784382  |
| O  | -5.655991 | -0.447498 | 0.450667  |

|   |           |           |           |
|---|-----------|-----------|-----------|
| H | -1.999666 | -1.587784 | -2.388893 |
| H | -6.615238 | 0.012629  | 2.244759  |
| C | -6.813372 | -0.464599 | 1.274230  |
| H | -4.040598 | -1.486635 | -1.021383 |
| H | -7.066224 | -1.520237 | 1.425069  |

79

Figure 4\_para-CO2Me\_ts(TB) / electronic energy: -3231.96311685 a.u. / lowest freq: -92.45 cm-1

|    |           |           |           |
|----|-----------|-----------|-----------|
| H  | 0.681867  | -3.477638 | -2.006275 |
| H  | 0.314635  | -3.758978 | -0.284690 |
| O  | 2.142023  | -1.749222 | -0.570850 |
| C  | 1.077837  | -3.885811 | -1.063540 |
| H  | 1.266205  | -4.960079 | -1.211862 |
| C  | 2.369347  | -3.166580 | -0.678741 |
| H  | 3.025695  | -2.863016 | -2.718795 |
| H  | 2.134294  | -3.637772 | 1.425287  |
| C  | 3.406443  | -3.312169 | -1.787565 |
| C  | 2.907424  | -3.694108 | 0.647028  |
| H  | 4.340690  | -2.798861 | -1.515027 |
| H  | 3.630431  | -4.371895 | -1.980955 |
| H  | 3.779441  | -3.110250 | 0.975641  |
| H  | 3.209731  | -4.747226 | 0.544617  |
| Cu | 0.944775  | -0.512861 | -1.670883 |
| H  | 1.496334  | 3.496852  | 2.382626  |
| H  | 3.856397  | 3.475277  | 1.805579  |
| H  | 3.078669  | 1.862048  | 1.923997  |
| C  | 3.640409  | 2.540339  | 1.267918  |
| H  | 1.717127  | 5.000228  | 1.451955  |
| H  | 4.596853  | 2.053530  | 1.026785  |
| C  | 1.169794  | 4.045842  | 1.490642  |
| H  | 0.099215  | 4.272306  | 1.606039  |
| C  | 1.392252  | 3.250116  | 0.213801  |
| C  | 2.873984  | 2.795867  | -0.028734 |
| O  | 0.700748  | 1.993018  | 0.305099  |
| H  | 3.777875  | 4.710292  | -0.509125 |
| B  | 1.449253  | 1.015968  | -0.327470 |
| H  | 4.693636  | 3.291987  | -1.072350 |
| C  | 3.681263  | 3.703491  | -0.943824 |
| O  | 2.693627  | 1.520954  | -0.667637 |
| H  | 1.236721  | 5.001699  | -1.091829 |
| C  | 0.791898  | 4.002715  | -0.973928 |
| H  | -0.288281 | 4.129403  | -0.808974 |
| H  | 3.226461  | 3.794247  | -1.939156 |
| H  | 0.932342  | 3.446080  | -1.912535 |
| H  | -0.245652 | -3.207022 | 2.888422  |
| H  | 1.870978  | -2.683044 | 3.229542  |
| H  | -1.818881 | -2.607023 | 2.321886  |
| C  | -0.892543 | -2.320662 | 2.842620  |
| O  | 0.169437  | -1.639457 | 0.817034  |
| H  | 1.188244  | -1.799549 | 4.619847  |
| C  | 1.770198  | -1.693079 | 3.692486  |
| H  | -1.158959 | -2.029204 | 3.869912  |
| B  | 1.400199  | -1.052499 | 0.458779  |
| H  | 2.779642  | -1.346975 | 3.960796  |
| C  | -0.229681 | -1.167580 | 2.095407  |
| C  | 1.139850  | -0.677277 | 2.739360  |
| O  | 2.021726  | -0.545932 | 1.619643  |
| H  | -2.093542 | -0.460878 | 1.299338  |
| C  | -1.260356 | -0.053664 | 1.890867  |
| H  | -1.667556 | 0.308513  | 2.846852  |
| H  | -0.835759 | 0.795432  | 1.340916  |
| H  | 0.295700  | 0.610569  | 4.275144  |
| C  | 1.024679  | 0.665429  | 3.452381  |
| H  | 1.997789  | 0.947143  | 3.883058  |
| H  | 0.713225  | 1.451280  | 2.755529  |
| H  | -1.568998 | 2.343117  | -1.972658 |
| H  | -3.641409 | 2.517060  | -0.609794 |
| H  | -0.067348 | 1.118155  | -3.333434 |
| C  | -2.150426 | 1.447079  | -1.746723 |
| C  | -3.304215 | 1.547849  | -0.981512 |
| C  | -0.446591 | 0.145623  | -3.000167 |
| O  | -5.671812 | 1.612125  | 0.595276  |
| C  | -1.704371 | 0.203014  | -2.216356 |
| H  | 0.941981  | -0.912662 | -4.246694 |
| C  | 0.136704  | -0.998731 | -3.511096 |
| C  | -4.044299 | 0.403097  | -0.669066 |
| C  | -5.263348 | 0.555506  | 0.176126  |
| C  | -2.452126 | -0.940992 | -1.897683 |
| H  | -0.338762 | -1.979736 | -3.426340 |
| C  | -3.609016 | -0.843177 | -1.135584 |
| H  | -7.819468 | 0.028777  | 0.745412  |
| O  | -5.861366 | -0.609076 | 0.427537  |
| H  | -2.127437 | -1.925590 | -2.239372 |
| H  | -6.818497 | -0.138801 | 2.219573  |
| C  | -7.032837 | -0.567873 | 1.230070  |
| H  | -4.177608 | -1.741572 | -0.892898 |
| H  | -7.368459 | -1.605465 | 1.339170  |

79

Figure 4\_para-CO2Me\_prod / electronic energy: -3231.97269053 a.u. / lowest freq: 15.93 cm-1

|   |          |           |           |
|---|----------|-----------|-----------|
| H | 1.125135 | -3.822630 | -1.711189 |
| H | 1.302296 | -4.295693 | -0.004487 |
| O | 2.239310 | -1.760014 | -0.422705 |
| C | 1.851128 | -4.108577 | -0.938227 |
| H | 2.338886 | -5.044377 | -1.248944 |
| C | 2.893212 | -3.009915 | -0.751149 |
| H | 2.953705 | -2.458520 | -2.844885 |
| H | 3.312062 | -3.526263 | 1.328060  |
| C | 3.651123 | -2.742909 | -2.043481 |

|    |           |           |           |
|----|-----------|-----------|-----------|
| C  | 3.853750  | -3.354101 | 0.384346  |
| H  | 4.375059  | -1.926080 | -1.905410 |
| H  | 4.196184  | -3.642771 | -2.363600 |
| H  | 4.576005  | -2.540079 | 0.543671  |
| H  | 4.410244  | -4.273186 | 0.147969  |
| Cu | 1.157484  | -0.289500 | -1.652307 |
| H  | 1.043123  | 3.332437  | 2.540237  |
| H  | 3.318792  | 3.881415  | 1.978201  |
| H  | 2.868544  | 2.167855  | 1.715244  |
| C  | 3.261678  | 3.074760  | 1.232198  |
| H  | 0.856766  | 5.000439  | 1.944522  |
| H  | 4.282567  | 2.855255  | 0.885707  |
| C  | 0.548730  | 3.955385  | 1.784743  |
| H  | -0.537189 | 3.893288  | 1.952871  |
| C  | 0.876715  | 3.510467  | 0.367392  |
| C  | 2.401945  | 3.465291  | 0.028261  |
| O  | 0.498405  | 2.140047  | 0.185688  |
| H  | 2.819332  | 5.597561  | 0.040926  |
| B  | 1.384072  | 1.519692  | -0.701737 |
| H  | 4.027992  | 4.609892  | -0.814736 |
| C  | 2.951069  | 4.727015  | -0.620414 |
| O  | 2.464374  | 2.380036  | -0.907407 |
| H  | 0.245728  | 5.418516  | -0.513411 |
| C  | 0.063357  | 4.339783  | -0.629242 |
| H  | -1.007376 | 4.155230  | -0.455448 |
| H  | 2.458498  | 4.938080  | -1.578979 |
| H  | 0.293617  | 4.055750  | -1.667095 |
| H  | -0.403632 | -3.360182 | 3.204542  |
| H  | 1.801493  | -2.842743 | 3.435850  |
| H  | -1.891770 | -2.825894 | 2.389729  |
| C  | -1.015769 | -2.482213 | 2.959719  |
| O  | 0.306448  | -2.108502 | 0.979397  |
| H  | 1.024659  | -1.935546 | 4.762849  |
| C  | 1.653667  | -1.840862 | 3.866147  |
| H  | -1.377717 | -2.033338 | 3.896803  |
| B  | 1.530260  | -1.549805 | 0.744353  |
| H  | 2.636867  | -1.457072 | 4.175780  |
| C  | -0.247474 | -1.457353 | 2.140981  |
| C  | 1.042338  | -0.879945 | 2.849954  |
| O  | 1.983077  | -0.769664 | 1.763388  |
| H  | -1.951960 | -0.849068 | 0.988230  |
| C  | -1.197033 | -0.376155 | 1.631772  |
| H  | -1.719934 | 0.120335  | 2.462446  |
| H  | -0.670532 | 0.388805  | 1.042979  |
| H  | 0.054903  | 0.468933  | 4.229794  |
| C  | 0.842725  | 0.494895  | 3.462046  |
| H  | 1.773609  | 0.831965  | 3.942144  |
| H  | 0.567207  | 1.221381  | 2.688443  |
| H  | -1.462582 | 1.981108  | -2.110429 |
| H  | -3.561124 | 2.209626  | -0.797569 |
| H  | -0.093555 | 0.609375  | -3.666640 |
| C  | -2.057826 | 1.097138  | -1.873794 |
| C  | -3.224408 | 1.227378  | -1.134294 |
| C  | -0.348233 | -0.273012 | -3.070254 |
| O  | -5.612344 | 1.351664  | 0.413160  |
| C  | -1.608512 | -0.165270 | -2.291608 |
| H  | 1.138489  | -1.482708 | -4.025255 |
| C  | 0.352982  | -1.440019 | -3.265379 |
| C  | -3.980404 | 0.097108  | -0.801189 |
| C  | -5.212896 | 0.282857  | 0.016463  |
| C  | -2.375234 | -1.291700 | -1.959471 |
| H  | 0.009184  | -2.393589 | -2.857257 |
| C  | -3.548104 | -1.164370 | -1.224110 |
| H  | -7.784847 | -0.196258 | 0.568787  |
| O  | -5.833940 | -0.868620 | 0.275335  |
| H  | -2.058997 | -2.284279 | -2.285616 |
| H  | -6.798485 | -0.360999 | 2.052801  |
| C  | -7.011196 | -0.798889 | 1.066721  |
| H  | -4.132102 | -2.050609 | -0.973139 |
| H  | -7.364444 | -1.829593 | 1.185704  |

44

Figure 4 para-CO2Me L-Cu-Bpin / electronic energy: -2588.18751234 a.u. / lowest freq: 14.46 cm<sup>-1</sup>

|   |           |           |           |
|---|-----------|-----------|-----------|
| O | -5.558121 | -1.400456 | 1.413493  |
| C | -4.969777 | -1.172026 | 0.384072  |
| H | -7.163184 | -2.439305 | -0.423265 |
| H | -5.906142 | -3.642941 | -0.001942 |
| O | -5.196452 | -1.831828 | -0.750376 |
| C | -6.185835 | -2.851673 | -0.712461 |
| H | -6.241573 | -3.264395 | -1.726124 |
| H | 4.596257  | -1.951192 | -2.559203 |
| H | 5.484395  | -0.617074 | -1.792449 |
| C | 4.972644  | -1.568700 | -1.598251 |
| H | 2.556436  | -2.877138 | -1.552758 |
| O | 2.943343  | -0.362946 | -1.100888 |
| H | 5.708685  | -2.291062 | -1.212281 |
| C | 3.816702  | -1.397656 | -0.623669 |
| C | 2.995315  | -2.686828 | -0.562093 |
| B | 2.418217  | 0.336598  | -0.019858 |
| H | 3.612027  | -3.555217 | -0.286175 |
| H | 5.340083  | 0.832942  | -0.014573 |
| H | 2.170961  | -2.598449 | 0.160892  |
| H | 6.371485  | -0.503922 | 0.567895  |
| C | 5.443585  | 0.055939  | 0.757457  |
| C | 4.219527  | -0.860717 | 0.791137  |
| O | 3.087406  | -0.046909 | 1.137136  |
| H | 5.540628  | 0.559310  | 1.730999  |
| H | 5.204109  | -2.638584 | 1.561175  |

|    |           |           |           |
|----|-----------|-----------|-----------|
| C  | 4.408484  | -1.935449 | 1.851979  |
| H  | 3.484232  | -2.503069 | 2.022068  |
| H  | 4.698517  | -1.471045 | 2.806504  |
| Cu | 0.892565  | 1.683854  | -0.131888 |
| C  | -1.933435 | 1.861067  | 0.053621  |
| C  | -2.606066 | 1.627684  | 1.262643  |
| C  | -2.265714 | 1.075501  | -1.063093 |
| C  | -3.245727 | 0.096270  | -0.973930 |
| C  | -3.914350 | -0.125684 | 0.236957  |
| C  | -3.586356 | 0.647025  | 1.354776  |
| H  | -1.749925 | 1.223553  | -2.013889 |
| H  | -3.494314 | -0.505676 | -1.848632 |
| H  | -4.106732 | 0.469324  | 2.297533  |
| H  | -2.351340 | 2.224215  | 2.142147  |
| C  | -0.880322 | 2.897095  | 0.016024  |
| C  | -0.164441 | 3.288343  | -1.075469 |
| H  | -0.732491 | 3.439754  | 0.956894  |
| H  | -0.352253 | 2.892878  | -2.078434 |
| H  | 0.519865  | 4.138290  | -1.005459 |

66

Figure 4\_para-CO2Me\_pcl / electronic energy: -3125.20059961 a.u. / lowest freq: 10.22 cm-1

|    |           |           |           |
|----|-----------|-----------|-----------|
| H  | 2.243341  | -0.139889 | 2.297012  |
| C  | 3.206258  | 1.319070  | 1.043262  |
| C  | 2.089418  | 0.698100  | 1.614480  |
| H  | 3.875048  | 2.867748  | -0.304432 |
| C  | 3.012456  | 2.380059  | 0.151621  |
| H  | -4.521605 | -2.965262 | 2.337865  |
| C  | 0.806937  | 1.116469  | 1.294933  |
| H  | -4.333543 | -3.285536 | -0.093182 |
| H  | -0.046594 | 0.598008  | 1.737798  |
| C  | 1.727126  | 2.793723  | -0.173120 |
| C  | 0.597223  | 2.171710  | 0.386352  |
| C  | -5.127863 | -2.052593 | 2.237162  |
| C  | -5.100898 | -2.507649 | -0.221491 |
| H  | -4.831865 | -1.359853 | 3.035793  |
| O  | -3.565553 | -0.958573 | 0.754721  |
| H  | 1.588441  | 3.612482  | -0.883727 |
| H  | -6.088770 | -2.986985 | -0.159855 |
| H  | -6.183084 | -2.328778 | 2.385284  |
| C  | -4.919729 | -1.443418 | 0.860348  |
| C  | -0.747417 | 2.625805  | 0.003202  |
| B  | -3.571522 | 0.171362  | -0.033962 |
| H  | -1.860182 | 1.871742  | 1.714418  |
| C  | -1.909290 | 2.365948  | 0.739746  |
| C  | -5.750657 | -0.143838 | 0.580146  |
| H  | -5.048179 | 0.860769  | 2.387045  |
| O  | -4.857216 | 0.604372  | -0.270051 |
| H  | -6.710825 | 0.220753  | 2.513375  |
| H  | -7.727730 | -1.021081 | 0.442466  |
| C  | -5.985793 | 0.694747  | 1.835820  |
| H  | -2.792922 | 2.989751  | 0.580833  |
| C  | -7.064700 | -0.371371 | -0.148984 |
| H  | -6.383795 | 1.677049  | 1.541307  |
| H  | -7.578982 | 0.589470  | -0.300160 |
| Cu | -1.884880 | 1.022785  | -0.758559 |
| H  | -0.781304 | 3.411170  | -0.759324 |
| H  | -4.982640 | -2.078937 | -1.228121 |
| H  | -6.911180 | -0.831179 | -1.133966 |
| H  | 1.641155  | 1.094762  | -3.080120 |
| H  | -0.738741 | 1.172498  | -3.133150 |
| H  | 3.781449  | 0.126528  | -2.279884 |
| C  | 1.631266  | 0.231620  | -2.409905 |
| C  | 2.829664  | -0.309117 | -1.970152 |
| C  | -0.850606 | 0.320824  | -2.454875 |
| H  | -2.231808 | -1.289888 | -1.965089 |
| C  | 0.397033  | -0.302500 | -1.996640 |
| C  | -2.117112 | -0.257249 | -2.305076 |
| C  | 2.837183  | -1.397994 | -1.091687 |
| C  | 0.417364  | -1.412488 | -1.128296 |
| H  | -2.946097 | 0.124379  | -2.908155 |
| C  | 1.617080  | -1.948944 | -0.681075 |
| H  | -0.518665 | -1.848978 | -0.773165 |
| H  | 1.610665  | -2.792021 | 0.011101  |
| C  | 4.147420  | -1.885499 | -0.582949 |
| O  | 5.218831  | -1.458567 | -0.951633 |
| O  | 4.020964  | -2.838755 | 0.336890  |
| H  | 5.913709  | -3.708927 | 0.214219  |
| C  | 5.216545  | -3.292341 | 0.955789  |
| H  | 4.917238  | -4.072931 | 1.664633  |
| H  | 5.701531  | -2.464810 | 1.492623  |
| C  | 4.554758  | 0.777202  | 1.361604  |
| O  | 4.753261  | -0.139186 | 2.127715  |
| O  | 5.529156  | 1.400091  | 0.703195  |
| H  | 7.155072  | 0.904851  | 1.912215  |
| C  | 6.841578  | 0.878761  | 0.858531  |
| H  | 7.497529  | 1.520148  | 0.258459  |
| H  | 6.885452  | -0.153892 | 0.484718  |

66

Figure 4\_para-CO2Me\_ts(CuBadd)\_01 / electronic energy: -3125.19811105 a.u. / lowest freq: -136.24 cm-1

|   |           |           |           |
|---|-----------|-----------|-----------|
| H | 2.044335  | 0.071331  | 2.289177  |
| C | 2.984159  | 1.451023  | 0.932932  |
| C | 1.875707  | 0.823783  | 1.515815  |
| H | 3.615964  | 2.900494  | -0.540645 |
| C | 2.764595  | 2.403458  | -0.073282 |
| H | -4.248609 | -2.146151 | 3.121078  |
| C | 0.586642  | 1.125726  | 1.105321  |
| H | -4.009569 | -3.122415 | 0.884275  |

|    |           |           |           |
|----|-----------|-----------|-----------|
| H  | -0.252339 | 0.601896  | 1.569800  |
| C  | 1.477772  | 2.702324  | -0.489469 |
| C  | 0.348848  | 2.072248  | 0.081853  |
| C  | -4.908676 | -1.339719 | 2.768880  |
| C  | -4.807416 | -2.452283 | 0.531660  |
| H  | -4.674805 | -0.435520 | 3.345733  |
| O  | -3.382698 | -0.603546 | 1.049115  |
| H  | 1.327218  | 3.440793  | -1.281492 |
| H  | -5.773208 | -2.947264 | 0.708572  |
| H  | -5.947804 | -1.632986 | 2.981563  |
| C  | -4.710147 | -1.123162 | 1.278208  |
| C  | -0.982699 | 2.386373  | -0.413824 |
| B  | -3.451666 | 0.256166  | -0.018159 |
| H  | -2.139681 | 1.700803  | 1.308112  |
| C  | -2.205193 | 2.019476  | 0.261315  |
| C  | -5.611769 | -0.000401 | 0.650589  |
| H  | -5.012196 | 1.502817  | 2.120663  |
| O  | -4.743725 | 0.546591  | -0.368169 |
| H  | -6.633662 | 0.812253  | 2.402240  |
| H  | -7.527807 | -1.007845 | 0.738269  |
| C  | -5.922945 | 1.132022  | 1.626778  |
| H  | -3.071230 | 2.659862  | 0.064648  |
| C  | -6.889487 | -0.501234 | -0.001210 |
| H  | -6.373461 | 1.969226  | 1.073525  |
| H  | -7.454803 | 0.347424  | -0.413762 |
| Cu | -1.828807 | 0.678168  | -1.164988 |
| H  | -1.038875 | 3.182446  | -1.162884 |
| H  | -4.680393 | -2.314436 | -0.552460 |
| H  | -6.680757 | -1.200157 | -0.821549 |
| H  | 1.574026  | 0.551635  | -3.354096 |
| H  | -0.802219 | 0.337397  | -3.512204 |
| H  | 3.761749  | -0.064942 | -2.359239 |
| C  | 1.617941  | -0.190904 | -2.553487 |
| C  | 2.843216  | -0.533700 | -2.001779 |
| C  | -0.864693 | -0.336280 | -2.651235 |
| H  | -2.171967 | -1.837378 | -1.751670 |
| C  | 0.424088  | -0.768211 | -2.084609 |
| C  | -2.105131 | -0.917277 | -2.338662 |
| C  | 2.917296  | -1.462195 | -0.957799 |
| C  | 0.512659  | -1.715025 | -1.046052 |
| H  | -2.960802 | -0.717131 | -2.990300 |
| C  | 1.738374  | -2.056257 | -0.491623 |
| H  | -0.391873 | -2.179272 | -0.647624 |
| H  | 1.781409  | -2.778960 | 0.324025  |
| C  | 4.249052  | -1.748535 | -0.356757 |
| O  | 5.285000  | -1.252167 | -0.738721 |
| O  | 4.183522  | -2.612930 | 0.652652  |
| H  | 6.157419  | -3.284871 | 0.672540  |
| C  | 5.393507  | -2.875441 | 1.349478  |
| H  | 5.146993  | -3.613170 | 2.121682  |
| H  | 5.767670  | -1.954269 | 1.817227  |
| C  | 4.341538  | 1.048733  | 1.372422  |
| O  | 4.564131  | 0.228324  | 2.236744  |
| O  | 5.310477  | 1.683598  | 0.712032  |
| H  | 6.876013  | 1.470803  | 2.071049  |
| C  | 6.643457  | 1.298653  | 1.009811  |
| H  | 7.290064  | 1.923586  | 0.382470  |
| H  | 6.799122  | 0.238364  | 0.765882  |

66

Figure 4\_para-CO2Me\_ts(CuBadd)\_02 / electronic energy: -3125.18742203 a.u. / lowest freq: -164.30 cm-1

|    |           |           |           |
|----|-----------|-----------|-----------|
| H  | 0.411987  | 4.818150  | 0.085534  |
| C  | 2.284394  | 3.849907  | -0.354687 |
| C  | 0.885020  | 3.900687  | -0.271218 |
| H  | 3.971019  | 2.609553  | -0.898453 |
| C  | 2.884263  | 2.667410  | -0.817054 |
| H  | -6.170348 | 2.447904  | 0.193487  |
| C  | 0.106910  | 2.811745  | -0.629857 |
| H  | -5.245908 | 1.385293  | 2.200500  |
| H  | -0.979622 | 2.889329  | -0.541316 |
| C  | 2.110492  | 1.574414  | -1.172258 |
| C  | 0.697572  | 1.605075  | -1.081933 |
| C  | -6.179171 | 1.506445  | -0.375409 |
| C  | -5.403181 | 0.403694  | 1.729729  |
| H  | -5.944889 | 1.740547  | -1.422030 |
| O  | -3.844090 | 1.049324  | 0.036446  |
| H  | 2.596387  | 0.663171  | -1.530024 |
| H  | -6.426732 | 0.074132  | 1.959277  |
| H  | -7.197101 | 1.090994  | -0.327747 |
| C  | -5.179353 | 0.532206  | 0.224261  |
| C  | -0.072989 | 0.418875  | -1.406285 |
| B  | -3.006979 | -0.021998 | -0.149176 |
| H  | -2.015556 | 1.362179  | -1.735111 |
| C  | -1.515562 | 0.403255  | -1.554613 |
| C  | -5.094591 | -0.856919 | -0.504116 |
| H  | -4.775451 | 0.037837  | -2.472453 |
| O  | -3.696320 | -1.189631 | -0.349622 |
| H  | -6.430087 | -0.576588 | -2.210719 |
| H  | -7.005362 | -1.689073 | 0.089386  |
| C  | -5.366558 | -0.763298 | -2.003856 |
| C  | -1.907096 | -0.400077 | -2.187793 |
| C  | -5.938103 | -1.956336 | 0.117814  |
| H  | -5.086284 | -1.714423 | -2.479885 |
| H  | -5.807867 | -2.891099 | -0.447278 |
| Cu | -1.013844 | -0.065781 | 0.325960  |
| H  | 0.489308  | -0.440661 | -1.782603 |
| H  | -4.695427 | -0.307025 | 2.182443  |
| H  | -5.653297 | -2.150200 | 1.160084  |

|   |           |           |           |
|---|-----------|-----------|-----------|
| H | 2.890492  | -0.220479 | 1.299919  |
| H | 0.781240  | 0.482994  | 2.029890  |
| H | 4.448961  | -1.942200 | 0.415014  |
| C | 2.526763  | -1.229238 | 1.090719  |
| C | 3.400180  | -2.186953 | 0.593927  |
| C | 0.282243  | -0.469620 | 1.817993  |
| H | -1.496568 | 0.170486  | 2.852231  |
| C | 1.174031  | -1.535082 | 1.323761  |
| C | -1.038861 | -0.624752 | 2.257644  |
| C | 2.947473  | -3.481455 | 0.315479  |
| C | 0.730486  | -2.842389 | 1.051296  |
| H | -1.504707 | -1.610895 | 2.349319  |
| C | 1.602862  | -3.799768 | 0.551811  |
| H | -0.314721 | -3.111765 | 1.218392  |
| H | 1.240051  | -4.806879 | 0.341928  |
| C | 3.064690  | 5.043841  | 0.047011  |
| O | 2.582391  | 6.069229  | 0.472735  |
| O | 4.383580  | 4.877628  | -0.105805 |
| H | 4.970980  | 6.865781  | -0.330920 |
| C | 5.208872  | 5.970808  | 0.262981  |
| H | 6.241321  | 5.660080  | 0.064782  |
| H | 5.091645  | 6.210981  | 1.330051  |
| C | 3.923061  | -4.471015 | -0.220376 |
| O | 5.095277  | -4.239769 | -0.401321 |
| O | 3.364941  | -5.652970 | -0.486662 |
| H | 5.006554  | -6.919074 | -0.272694 |
| C | 4.222374  | -6.662630 | -0.999849 |
| H | 4.697397  | -6.337362 | -1.936726 |
| H | 3.589931  | -7.537904 | -1.187116 |

66

Figure 4 para-CO2Me L-Cu-alkyl\_01 / electronic energy: -3125.23833982 a.u. / lowest freq: 20.99 cm-1

|    |           |           |           |
|----|-----------|-----------|-----------|
| H  | 1.454609  | -1.179568 | 2.169217  |
| C  | 2.362794  | 0.704943  | 1.669023  |
| C  | 1.266607  | -0.138387 | 1.896288  |
| H  | 2.944355  | 2.723736  | 1.154156  |
| C  | 2.108356  | 2.042128  | 1.321954  |
| H  | -2.853561 | -3.696920 | 1.627569  |
| C  | -0.035301 | 0.322897  | 1.770961  |
| H  | -1.431291 | -2.307955 | 0.181944  |
| H  | -0.861955 | -0.367335 | 1.947174  |
| C  | 0.809628  | 2.498828  | 1.178691  |
| C  | -0.313466 | 1.654002  | 1.372365  |
| C  | -3.779687 | -3.237440 | 1.252111  |
| C  | -2.333223 | -1.917094 | -0.310703 |
| H  | -4.499027 | -3.197030 | 2.080299  |
| O  | -3.038564 | -0.993605 | 1.762580  |
| H  | 0.638876  | 3.542118  | 0.895735  |
| H  | -2.569565 | -2.566667 | -1.165725 |
| H  | -4.187130 | -3.889516 | 0.464711  |
| C  | -3.479630 | -1.856918 | 0.697818  |
| C  | -1.677981 | 2.153034  | 1.123700  |
| B  | -3.425191 | 0.284115  | 1.437096  |
| H  | -2.461793 | 1.453925  | 3.068109  |
| C  | -2.811523 | 1.597544  | 2.027652  |
| C  | -4.723659 | -1.074262 | 0.146675  |
| H  | -5.852343 | -1.298688 | 2.003932  |
| O  | -4.361791 | 0.289769  | 0.430962  |
| H  | -6.385857 | -2.383510 | 0.689551  |
| H  | -5.106129 | -2.282730 | -1.612270 |
| C  | -6.006608 | -1.376978 | 0.917478  |
| H  | -3.613867 | 2.352581  | 2.065682  |
| C  | -4.958561 | -1.225248 | -1.346827 |
| H  | -6.777218 | -0.646834 | 0.630297  |
| H  | -5.861101 | -0.670606 | -1.643457 |
| Cu | -1.851562 | 1.686633  | -0.821700 |
| H  | -1.666254 | 3.254556  | 1.173432  |
| H  | -2.098315 | -0.907177 | -0.685346 |
| H  | -4.114903 | -0.828694 | -1.925157 |
| H  | 1.652672  | 2.570670  | -2.275882 |
| H  | -0.627574 | 2.671611  | -2.827220 |
| H  | 3.717298  | 1.317019  | -1.685542 |
| C  | 1.621292  | 1.482714  | -2.180216 |
| C  | 2.777603  | 0.787552  | -1.849666 |
| C  | -0.807335 | 1.603205  | -2.658532 |
| H  | -2.287593 | 0.049644  | -2.867884 |
| C  | 0.407386  | 0.808147  | -2.368882 |
| C  | -2.069473 | 1.121246  | -2.860691 |
| C  | 2.739408  | -0.598078 | -1.681598 |
| C  | 0.389085  | -0.590719 | -2.243441 |
| H  | -2.860967 | 1.788513  | -3.213818 |
| C  | 1.537130  | -1.285233 | -1.888328 |
| H  | -0.535277 | -1.146283 | -2.408654 |
| H  | 1.501501  | -2.368071 | -1.764328 |
| C  | 3.991068  | -1.286875 | -1.248551 |
| O  | 5.073186  | -0.748646 | -1.209809 |
| O  | 3.786026  | -2.551302 | -0.900206 |
| H  | 5.721820  | -3.308892 | -1.078499 |
| C  | 4.897443  | -3.250193 | -0.353286 |
| H  | 4.537379  | -4.257762 | -0.116329 |
| H  | 5.240683  | -2.747836 | 0.561714  |
| C  | 3.727700  | 0.146440  | 1.774768  |
| O  | 3.978284  | -1.016823 | 2.012825  |
| O  | 4.682614  | 1.061731  | 1.583065  |
| H  | 6.246530  | 0.158591  | 2.622213  |
| C  | 6.025296  | 0.606128  | 1.642007  |
| H  | 6.655476  | 1.490091  | 1.488082  |
| H  | 6.217635  | -0.131192 | 0.850144  |

66

Figure 4\_para-CO2Me\_L-Cu-alkyl\_02 / electronic energy: -3125.23509021 a.u. / lowest freq: 10.91 cm-1

|    |           |           |           |
|----|-----------|-----------|-----------|
| C  | 2.262491  | 2.712946  | -0.674996 |
| C  | 2.352996  | 1.760144  | -1.699748 |
| C  | 2.963084  | 2.485711  | 0.520612  |
| C  | 3.709360  | 1.327772  | 0.692632  |
| C  | 3.783325  | 0.377472  | -0.332993 |
| C  | 3.105772  | 0.605131  | -1.532693 |
| H  | 2.916599  | 3.212831  | 1.333846  |
| H  | 4.234348  | 1.152534  | 1.632130  |
| H  | 3.157302  | -0.145698 | -2.322553 |
| H  | 1.808151  | 1.921345  | -2.632957 |
| C  | 1.386415  | 3.888545  | -0.885004 |
| C  | 1.096108  | 4.868796  | 0.023224  |
| H  | 1.017208  | 4.007488  | -1.910512 |
| H  | 1.550238  | 4.901184  | 1.018645  |
| H  | 0.542023  | 5.757188  | -0.293140 |
| B  | -3.761779 | 0.616004  | -0.156748 |
| O  | -4.067849 | -0.201151 | -1.213305 |
| O  | -4.191835 | 0.098308  | 1.038175  |
| C  | -4.872292 | -1.291230 | -0.727567 |
| C  | -4.560643 | -1.274796 | 0.816906  |
| C  | -4.455699 | -2.566855 | -1.443319 |
| C  | -6.326738 | -0.954633 | -1.050581 |
| C  | -3.349504 | -2.127607 | 1.195227  |
| C  | -5.743280 | -1.626040 | 1.705767  |
| H  | -2.478383 | -1.894292 | 0.565453  |
| H  | -3.567223 | -3.202204 | 1.111880  |
| H  | -3.074301 | -1.911563 | 2.237966  |
| H  | -6.574461 | -0.920688 | 1.576191  |
| H  | -5.436408 | -1.595807 | 2.761865  |
| H  | -6.105534 | -2.641974 | 1.487460  |
| H  | -6.650672 | -0.037761 | -0.535873 |
| H  | -7.005837 | -1.771900 | -0.767809 |
| H  | -6.424865 | -0.786164 | -2.133286 |
| H  | -4.984196 | -3.438032 | -1.027786 |
| H  | -3.374670 | -2.740119 | -1.360815 |
| H  | -4.706260 | -2.494532 | -2.512223 |
| C  | -0.049108 | 0.245792  | 1.570888  |
| C  | 0.775267  | -0.858629 | 1.465145  |
| C  | -0.835180 | 0.703450  | 0.482247  |
| C  | 0.858607  | -1.583561 | 0.264239  |
| C  | -0.743629 | -0.047021 | -0.715726 |
| C  | 0.080291  | -1.158818 | -0.820745 |
| C  | -1.667100 | 1.914393  | 0.601281  |
| C  | -2.938457 | 1.952512  | -0.277890 |
| H  | 0.130366  | -1.705626 | -1.764140 |
| H  | -1.332418 | 0.251605  | -1.585132 |
| H  | 1.379286  | -1.182642 | 2.315825  |
| H  | -0.095334 | 0.792235  | 2.517850  |
| Cu | -0.323892 | 3.328845  | 0.195967  |
| H  | -2.711914 | 2.145852  | -1.340488 |
| H  | -3.565690 | 2.802740  | 0.042334  |
| H  | -1.942673 | 2.051660  | 1.660912  |
| C  | 4.537356  | -0.902659 | -0.185862 |
| O  | 4.669474  | -1.707756 | -1.078765 |
| O  | 5.046451  | -1.063229 | 1.029662  |
| H  | 6.077770  | -2.234656 | 2.317049  |
| C  | 5.691891  | -2.303231 | 1.293481  |
| H  | 6.520929  | -2.472823 | 0.591468  |
| H  | 4.964136  | -3.123109 | 1.217858  |
| C  | 1.784049  | -2.733047 | 0.188672  |
| O  | 2.485876  | -3.109979 | 1.104383  |
| O  | 1.780905  | -3.329836 | -1.006697 |
| H  | 3.737006  | -4.018162 | -1.069586 |
| C  | 2.708920  | -4.386634 | -1.192863 |
| H  | 2.562568  | -4.747018 | -2.218191 |
| H  | 2.524654  | -5.206696 | -0.483165 |

66

Figure 4\_para-CO2Me\_L-Cu-alkyl\_03 / electronic energy: -3125.23447326 a.u. / lowest freq: 15.81 cm-1

|   |           |           |           |
|---|-----------|-----------|-----------|
| B | -4.075815 | -0.978398 | -0.081646 |
| O | -5.146829 | -1.739202 | -0.477284 |
| O | -4.468720 | 0.222097  | 0.452355  |
| C | -6.325796 | -0.916294 | -0.410310 |
| C | -5.897440 | 0.184266  | 0.627527  |
| C | -7.510023 | -1.768695 | 0.015400  |
| C | -6.560778 | -0.352353 | -1.811123 |
| C | -6.158866 | -0.228023 | 2.075221  |
| C | -6.472844 | 1.566245  | 0.364934  |
| H | -5.760976 | -1.232398 | 2.283326  |
| H | -7.232661 | -0.221286 | 2.311149  |
| H | -5.654265 | 0.481309  | 2.747515  |
| H | -6.159887 | 1.959463  | -0.611242 |
| H | -6.128612 | 2.268215  | 1.139031  |
| H | -7.572577 | 1.540356  | 0.396222  |
| H | -5.726983 | 0.290496  | -2.131248 |
| H | -7.491206 | 0.231315  | -1.863714 |
| H | -6.637020 | -1.185835 | -2.524884 |
| H | -8.403764 | -1.143978 | 0.163827  |
| H | -7.306286 | -2.315786 | 0.945160  |
| H | -7.738454 | -2.506535 | -0.767964 |
| C | 0.756677  | -0.729217 | 1.525048  |
| C | 2.093978  | -1.066368 | 1.468718  |
| C | -0.163737 | -1.120969 | 0.514744  |
| C | 2.602134  | -1.829312 | 0.401620  |
| C | 0.360832  | -1.922350 | -0.528922 |
| C | 1.708291  | -2.255975 | -0.588801 |



|    |           |           |           |
|----|-----------|-----------|-----------|
| C  | -1.557258 | -0.657008 | 0.552364  |
| C  | -2.588714 | -1.445674 | -0.253275 |
| H  | 2.078386  | -2.858767 | -1.420557 |
| H  | -0.304319 | -2.275689 | -1.319801 |
| H  | 2.781356  | -0.732875 | 2.249299  |
| H  | 0.392699  | -0.117341 | 2.356383  |
| Cu | -1.316846 | 1.204697  | -0.124656 |
| H  | -2.557655 | -2.533901 | -0.029799 |
| H  | -2.388605 | -1.395963 | -1.341676 |
| H  | -1.883053 | -0.527358 | 1.598916  |
| H  | 3.355647  | 0.516407  | -2.143454 |
| C  | 2.998645  | 1.167329  | -1.343714 |
| H  | 1.026326  | 1.346280  | -2.161344 |
| C  | 1.694572  | 1.638489  | -1.348466 |
| C  | 3.868173  | 1.497265  | -0.297498 |
| H  | -0.843819 | 2.583187  | -2.262452 |
| C  | 3.413136  | 2.305911  | 0.746754  |
| C  | 1.228857  | 2.457789  | -0.306610 |
| C  | -1.081020 | 2.953375  | -1.259906 |
| H  | 4.081831  | 2.556492  | 1.570835  |
| C  | 2.105430  | 2.780269  | 0.738399  |
| C  | -0.161131 | 2.967918  | -0.248703 |
| H  | 1.753537  | 3.408278  | 1.560533  |
| H  | -0.411194 | 3.513905  | 0.668704  |
| H  | -2.027098 | 3.490036  | -1.143040 |
| H  | 7.637693  | 0.950294  | 1.843007  |
| C  | 7.216280  | 0.593543  | 0.896208  |
| H  | 7.877030  | 0.876052  | 0.063939  |
| H  | 7.099550  | -0.498870 | 0.924596  |
| O  | 5.941712  | 1.209638  | 0.770638  |
| C  | 5.248016  | 0.927393  | -0.325160 |
| O  | 5.686616  | 0.281481  | -1.248776 |
| H  | 5.904137  | -3.645497 | -1.806318 |
| C  | 5.803901  | -3.051190 | -0.890165 |
| H  | 6.216478  | -3.611318 | -0.038222 |
| H  | 6.345108  | -2.101286 | -1.001836 |
| O  | 4.415575  | -2.809976 | -0.724035 |
| C  | 4.051433  | -2.110665 | 0.355069  |
| O  | 4.847865  | -1.747265 | 1.196131  |

66

Figure 4\_para-CO2Me\_ts(BHE) / electronic energy: -3125.19981935 a.u. / lowest freq: -841.51 cm<sup>-1</sup>

|    |           |           |           |
|----|-----------|-----------|-----------|
| B  | -3.879519 | 0.747206  | 0.113332  |
| O  | -4.873836 | 1.321118  | 0.848835  |
| O  | -4.341177 | 0.018839  | -0.945096 |
| C  | -6.117884 | 0.730549  | 0.411848  |
| C  | -5.762556 | 0.254736  | -1.044861 |
| C  | -7.220949 | 1.771749  | 0.489349  |
| C  | -6.410293 | -0.428229 | 1.362741  |
| C  | -5.961860 | 1.343601  | -2.096464 |
| C  | -6.451077 | -1.028783 | -1.477523 |
| H  | -5.484826 | 2.288046  | -1.795284 |
| H  | -7.028734 | 1.534027  | -2.281446 |
| H  | -5.502615 | 1.017128  | -3.040990 |
| H  | -6.176604 | -1.875050 | -0.834209 |
| H  | -6.163468 | -1.277400 | -2.509744 |
| H  | -7.544289 | -0.906502 | -1.450850 |
| H  | -5.620303 | -1.193212 | 1.319230  |
| H  | -7.373677 | -0.906814 | 1.136382  |
| H  | -6.451647 | -0.043472 | 2.392265  |
| H  | -8.155823 | 1.373364  | 0.067308  |
| H  | -6.954364 | 2.688686  | -0.052159 |
| H  | -7.409138 | 2.037804  | 1.539892  |
| C  | 0.902776  | 0.985837  | -1.498849 |
| C  | 2.236953  | 1.338491  | -1.401221 |
| C  | 0.031581  | 1.082376  | -0.390049 |
| C  | 2.767544  | 1.806991  | -0.190867 |
| C  | 0.578374  | 1.566261  | 0.820424  |
| C  | 1.916517  | 1.921779  | 0.915688  |
| C  | -1.355262 | 0.653111  | -0.521713 |
| C  | -2.361291 | 0.882590  | 0.469624  |
| H  | 2.315446  | 2.279435  | 1.866315  |
| H  | -0.051872 | 1.651171  | 1.708743  |
| H  | 2.902044  | 1.235066  | -2.261064 |
| H  | 0.511871  | 0.606483  | -2.446730 |
| Cu | -1.573063 | -1.013150 | 0.695826  |
| H  | -2.140370 | 1.595062  | 1.272299  |
| H  | -2.601059 | -0.293349 | 1.645662  |
| H  | -1.678557 | 0.348291  | -1.521946 |
| H  | 3.454821  | -1.036212 | 2.075487  |
| C  | 2.944647  | -1.444413 | 1.201326  |
| H  | 1.080277  | -1.690749 | 2.223954  |
| C  | 1.609566  | -1.811527 | 1.276286  |
| C  | 3.649536  | -1.561501 | -0.001820 |
| H  | -0.803784 | -2.873908 | 2.316084  |
| C  | 2.993238  | -2.062351 | -1.130710 |
| C  | 0.934879  | -2.303991 | 0.144721  |
| C  | -1.252816 | -2.896442 | 1.318645  |
| H  | 3.530601  | -2.153647 | -2.075366 |
| C  | 1.652860  | -2.421615 | -1.056153 |
| C  | -0.493755 | -2.673359 | 0.168987  |
| H  | 1.145386  | -2.798170 | -1.947710 |
| H  | -0.902623 | -3.007082 | -0.791485 |
| H  | -2.204752 | -3.428437 | 1.236369  |
| H  | 7.210759  | -0.894156 | -2.441191 |
| C  | 6.928938  | -0.697263 | -1.400373 |
| H  | 7.632790  | -1.199981 | -0.721531 |
| H  | 6.936567  | 0.384631  | -1.208328 |

|   |          |           |           |
|---|----------|-----------|-----------|
| O | 5.613164 | -1.210874 | -1.243556 |
| C | 5.064844 | -1.096998 | -0.037771 |
| O | 5.655261 | -0.657763 | 0.923168  |
| H | 6.133630 | 3.040878  | 2.306331  |
| C | 6.007257 | 2.686850  | 1.276410  |
| H | 6.398823 | 3.437849  | 0.575025  |
| H | 6.545649 | 1.738588  | 1.138562  |
| O | 4.613686 | 2.488905  | 1.091593  |
| C | 4.218484 | 2.105262  | -0.122623 |
| O | 4.978495 | 2.007862  | -1.061918 |

66

Figure 4\_para-CO2Me\_pc2 / electronic energy: -3125.21803273 a.u. / lowest freq: 26.75 cm-1

|    |           |           |           |
|----|-----------|-----------|-----------|
| B  | -3.788137 | 0.842095  | -0.054901 |
| O  | -4.828444 | 1.448047  | 0.585792  |
| O  | -4.189089 | -0.070851 | -0.992828 |
| C  | -6.022209 | 0.709454  | 0.250896  |
| C  | -5.622950 | 0.036174  | -1.115829 |
| C  | -7.195589 | 1.670373  | 0.167381  |
| C  | -6.243954 | -0.305443 | 1.370304  |
| C  | -5.904277 | 0.924466  | -2.325467 |
| C  | -6.206922 | -1.349730 | -1.333673 |
| H  | -5.491252 | 1.935011  | -2.188816 |
| H  | -6.982925 | 1.011351  | -2.519347 |
| H  | -5.430004 | 0.482265  | -3.213910 |
| H  | -5.878774 | -2.056308 | -0.560276 |
| H  | -5.884079 | -1.741043 | -2.309889 |
| H  | -7.306579 | -1.310489 | -1.330651 |
| H  | -5.402458 | -1.010219 | 1.447294  |
| H  | -7.171676 | -0.875432 | 1.219276  |
| H  | -6.320558 | 0.229046  | 2.328309  |
| H  | -8.100643 | 1.146337  | -0.174442 |
| H  | -6.992130 | 2.503771  | -0.517769 |
| H  | -7.401548 | 2.092319  | 1.162078  |
| C  | 1.019022  | 0.831811  | -1.506423 |
| C  | 2.364172  | 1.165183  | -1.437198 |
| C  | 0.149502  | 1.118591  | -0.443539 |
| C  | 2.878255  | 1.784678  | -0.294994 |
| C  | 0.669397  | 1.769605  | 0.688518  |
| C  | 2.017244  | 2.095784  | 0.764418  |
| C  | -1.260819 | 0.700814  | -0.545595 |
| C  | -2.292277 | 1.165263  | 0.245345  |
| H  | 2.412295  | 2.573821  | 1.661515  |
| H  | 0.019699  | 1.998472  | 1.536044  |
| H  | 3.042681  | 0.915152  | -2.254520 |
| H  | 0.631804  | 0.323445  | -2.392525 |
| Cu | -1.802212 | -0.669444 | 1.106851  |
| H  | -2.082230 | 1.927280  | 1.003545  |
| H  | -2.651539 | -0.506867 | 2.418313  |
| H  | -1.508209 | 0.116217  | -1.438751 |
| H  | 3.350221  | -0.862425 | 2.048387  |
| C  | 2.820401  | -1.329139 | 1.216236  |
| H  | 0.918281  | -1.293058 | 2.207002  |
| C  | 1.457760  | -1.572898 | 1.298854  |
| C  | 3.527649  | -1.637252 | 0.048750  |
| H  | -0.883634 | -2.772002 | 2.379310  |
| C  | 2.849991  | -2.212420 | -1.030554 |
| C  | 0.762976  | -2.129403 | 0.212606  |
| C  | -1.384148 | -2.682875 | 1.410853  |
| H  | 3.391009  | -2.452597 | -1.946515 |
| C  | 1.481977  | -2.448324 | -0.948551 |
| C  | -0.690354 | -2.384507 | 0.261777  |
| H  | 0.957037  | -2.880821 | -1.803902 |
| H  | -1.176893 | -2.559147 | -0.703903 |
| H  | -2.391458 | -3.102334 | 1.347097  |
| H  | 7.105331  | -1.306021 | -2.433668 |
| C  | 6.856532  | -1.076161 | -1.391224 |
| H  | 7.530947  | -1.624488 | -0.717657 |
| H  | 6.951215  | 0.003716  | -1.212735 |
| O  | 5.508747  | -1.489362 | -1.207739 |
| C  | 4.970041  | -1.264253 | -0.013569 |
| O  | 5.584197  | -0.791277 | 0.915675  |
| H  | 6.286159  | 3.001701  | 2.156260  |
| C  | 6.150750  | 2.617916  | 1.138627  |
| H  | 6.577994  | 3.325984  | 0.413731  |
| H  | 6.644013  | 1.641095  | 1.035358  |
| O  | 4.748660  | 2.478667  | 0.949837  |
| C  | 4.349095  | 2.021185  | -0.232213 |
| O  | 5.105321  | 1.801817  | -1.151091 |

42

Figure 4\_para-CO2Me-alkenylBpin / electronic energy: -947.261050912 a.u. / lowest freq: 13.61 cm-1

|   |          |           |           |
|---|----------|-----------|-----------|
| B | 2.536731 | -0.351136 | -0.017816 |
| O | 3.507318 | -1.307017 | 0.091467  |
| O | 3.044449 | 0.917279  | -0.089343 |
| C | 4.760349 | -0.629615 | 0.319214  |
| C | 4.471353 | 0.802509  | -0.264709 |
| C | 5.875327 | -1.387204 | -0.382583 |
| C | 4.996326 | -0.622611 | 1.828498  |
| C | 4.745855 | 0.900135  | -1.764214 |
| C | 5.160646 | 1.939871  | 0.470457  |
| H | 4.269808 | 0.075213  | -2.315220 |
| H | 5.823957 | 0.886700  | -1.979228 |
| H | 4.330817 | 1.845090  | -2.144324 |
| H | 4.841247 | 2.001481  | 1.518889  |
| H | 4.920642 | 2.897749  | -0.014329 |
| H | 6.253003 | 1.810310  | 0.441985  |
| H | 4.207048 | -0.068094 | 2.357891  |
| H | 5.967553 | -0.174767 | 2.082696  |

|   |           |           |           |
|---|-----------|-----------|-----------|
| H | 4.987792  | -1.658529 | 2.197849  |
| H | 6.823693  | -0.833725 | -0.309558 |
| H | 5.649454  | -1.557045 | -1.443307 |
| H | 6.018218  | -2.368010 | 0.094703  |
| C | -2.207218 | 1.219150  | 0.141935  |
| C | -3.592625 | 1.099338  | 0.165560  |
| C | -1.385376 | 0.103371  | -0.083437 |
| C | -4.189417 | -0.146927 | -0.050480 |
| C | -1.997705 | -1.142169 | -0.304573 |
| C | -3.380002 | -1.264785 | -0.289389 |
| C | 0.078353  | 0.284197  | -0.078553 |
| C | 1.016202  | -0.679307 | -0.047860 |
| H | -3.852270 | -2.233203 | -0.464204 |
| H | -1.388084 | -2.026100 | -0.502335 |
| H | -4.214799 | 1.975709  | 0.350685  |
| H | -1.746933 | 2.196518  | 0.307586  |
| H | 0.706356  | -1.730832 | -0.015627 |
| H | 0.406700  | 1.330741  | -0.083277 |
| O | -6.220518 | -1.390859 | -0.242301 |
| H | -8.075832 | 0.017569  | 1.049167  |
| C | -5.670406 | -0.334915 | -0.040108 |
| H | -8.154100 | 0.388896  | -0.700309 |
| C | -7.745844 | 0.716413  | 0.266859  |
| O | -6.327659 | 0.794119  | 0.220526  |
| H | -8.101542 | 1.727137  | 0.496846  |

87

Figure 4\_para-CO2Me\_pc3\_01 / electronic energy: -3964.07601958 a.u. / lowest freq: 7.26 cm<sup>-1</sup>

|    |           |           |           |
|----|-----------|-----------|-----------|
| C  | 0.117077  | 1.571292  | 0.782291  |
| C  | -0.392408 | 1.691214  | -0.487956 |
| C  | 0.179204  | 2.660615  | -1.483812 |
| O  | -0.495493 | 3.928253  | -1.404864 |
| P  | -0.186750 | 4.925795  | -0.188915 |
| O  | 1.200219  | 4.952120  | 0.317930  |
| O  | -0.755568 | 6.261736  | -0.862774 |
| O  | -1.221466 | 4.566870  | 0.983901  |
| C  | -0.687339 | 7.489418  | -0.142679 |
| H  | -0.445079 | 1.106901  | 1.597140  |
| H  | 0.999426  | 2.147537  | 1.080825  |
| H  | -1.393095 | 1.306030  | -0.712736 |
| H  | 1.257895  | 2.809874  | -1.320770 |
| H  | 0.023942  | 2.324816  | -2.516143 |
| B  | -0.531144 | -1.761991 | 2.109368  |
| O  | -1.672026 | -2.188102 | 1.483509  |
| O  | -0.806826 | -0.921509 | 3.159073  |
| C  | -2.796772 | -1.483215 | 2.042608  |
| C  | -2.222231 | -0.986702 | 3.422476  |
| C  | -3.976292 | -2.438224 | 2.139993  |
| C  | -3.146392 | -0.337592 | 1.096341  |
| C  | -2.420713 | -2.000260 | 4.548315  |
| C  | -2.708660 | 0.384991  | 3.862521  |
| H  | -2.072080 | -3.001777 | 4.254728  |
| H  | -3.476368 | -2.072834 | 4.846623  |
| H  | -1.836868 | -1.683410 | 5.424967  |
| H  | -2.448993 | 1.166327  | 3.136138  |
| H  | -2.244192 | 0.650472  | 4.823514  |
| H  | -3.800261 | 0.384425  | 4.001094  |
| H  | -2.337182 | 0.400042  | 1.037923  |
| H  | -4.060131 | 0.182082  | 1.418270  |
| H  | -3.316148 | -0.742267 | 0.090043  |
| H  | -4.819033 | -1.962741 | 2.664135  |
| H  | -3.711287 | -3.363442 | 2.667885  |
| H  | -4.315833 | -2.708295 | 1.128728  |
| C  | 4.109231  | -0.169967 | 0.864059  |
| C  | 5.407401  | -0.347334 | 0.420725  |
| C  | 3.163392  | -1.227446 | 0.868257  |
| C  | 5.839862  | -1.603223 | -0.043433 |
| C  | 3.625936  | -2.486572 | 0.421740  |
| C  | 4.928269  | -2.665635 | -0.027592 |
| C  | 1.775287  | -0.973826 | 1.275604  |
| C  | 0.919908  | -2.182059 | 1.677712  |
| H  | 5.260124  | -3.647798 | -0.372645 |
| H  | 2.948069  | -3.342416 | 0.426292  |
| H  | 6.107198  | 0.490412  | 0.431542  |
| H  | 3.794257  | 0.816861  | 1.217504  |
| Cu | 0.827759  | -0.052826 | -0.281519 |
| H  | 1.387473  | -2.740042 | 2.517144  |
| H  | 0.831891  | -2.908492 | 0.851941  |
| H  | 1.762614  | -0.213569 | 2.071234  |
| H  | -1.104721 | 8.266821  | -0.794064 |
| H  | 0.355232  | 7.741292  | 0.103077  |
| H  | -1.277810 | 7.440768  | 0.785741  |
| C  | -2.598261 | 4.326554  | 0.723916  |
| H  | -3.125052 | 4.385908  | 1.684697  |
| H  | -2.743291 | 3.323782  | 0.293436  |
| H  | -3.016900 | 5.079083  | 0.037704  |
| H  | -3.080316 | -3.692817 | -1.229254 |
| C  | -2.800443 | -2.747866 | -1.695015 |
| H  | -0.719834 | -3.022456 | -1.282538 |
| C  | -3.787810 | -1.914924 | -2.231937 |
| C  | -1.466585 | -2.363826 | -1.727170 |
| C  | -3.414817 | -0.701963 | -2.823133 |
| C  | -1.081953 | -1.144810 | -2.304669 |
| H  | -4.186018 | -0.054034 | -3.243600 |
| C  | -2.078786 | -0.325821 | -2.861642 |
| C  | 0.325846  | -0.692837 | -2.334404 |
| H  | -1.797493 | 0.623153  | -3.325358 |
| H  | 0.527615  | 0.176203  | -2.967382 |

|   |           |           |           |
|---|-----------|-----------|-----------|
| H | 2.410327  | -1.062122 | -2.026780 |
| C | 1.387807  | -1.378908 | -1.802554 |
| H | 1.282204  | -2.369428 | -1.352493 |
| H | -6.805737 | -4.755030 | -0.841670 |
| H | -7.295435 | -3.945490 | -2.369075 |
| C | -6.821325 | -3.804648 | -1.386955 |
| O | -5.464811 | -3.406112 | -1.530122 |
| H | -7.392173 | -3.057105 | -0.817225 |
| C | -5.238169 | -2.251786 | -2.158893 |
| O | -6.120644 | -1.555579 | -2.600817 |
| H | 9.795293  | 0.091295  | -0.798463 |
| H | 9.373369  | -1.198179 | -1.974417 |
| C | 9.326191  | -0.892430 | -0.918689 |
| O | 7.984031  | -0.751437 | -0.484714 |
| H | 9.864762  | -1.634879 | -0.311347 |
| C | 7.215866  | -1.847600 | -0.531356 |
| O | 7.627292  | -2.912256 | -0.935299 |

87

Figure 4 para-CO2Me\_pc3\_02 / electronic energy: -3964.08215085 a.u. / lowest freq: 18.88 cm-1

|    |           |           |           |
|----|-----------|-----------|-----------|
| C  | 1.751368  | 1.642526  | -0.949525 |
| C  | 1.168041  | 2.091841  | 0.204683  |
| C  | -0.321330 | 2.321792  | 0.311317  |
| O  | -0.794789 | 3.179455  | -0.737015 |
| P  | -1.761643 | 2.593447  | -1.870636 |
| O  | -1.208909 | 1.571337  | -2.784706 |
| O  | -3.025417 | 2.122772  | -1.000259 |
| O  | -2.204239 | 3.917302  | -2.635728 |
| C  | -3.880586 | 1.063022  | -1.425885 |
| H  | 2.832535  | 1.706924  | -1.103492 |
| H  | 1.142228  | 1.437131  | -1.836065 |
| H  | 1.791757  | 2.520437  | 0.995561  |
| H  | -0.880502 | 1.374417  | 0.284863  |
| H  | -0.565981 | 2.815397  | 1.259618  |
| B  | 4.568308  | -1.187133 | -0.329184 |
| O  | 5.061113  | -1.137542 | 0.954215  |
| O  | 5.054497  | -0.163827 | -1.102194 |
| C  | 5.701072  | 0.139599  | 1.129961  |
| C  | 6.065088  | 0.530757  | -0.349713 |
| C  | 6.890540  | -0.015447 | 2.062206  |
| C  | 4.661421  | 1.072004  | 1.752128  |
| C  | 7.418883  | -0.017623 | -0.796979 |
| C  | 5.978445  | 2.018062  | -0.653288 |
| H  | 7.509333  | -1.092942 | -0.582556 |
| H  | 8.251323  | 0.506912  | -0.306080 |
| H  | 7.519999  | 0.120573  | -1.883438 |
| H  | 4.970753  | 2.416092  | -0.476179 |
| H  | 6.230299  | 2.197297  | -1.708916 |
| H  | 6.689726  | 2.583789  | -0.032825 |
| H  | 3.779224  | 1.166096  | 1.099241  |
| H  | 5.070301  | 2.074669  | 1.940247  |
| H  | 4.329077  | 0.652097  | 2.713364  |
| H  | 7.440254  | 0.933944  | 2.148931  |
| H  | 7.584299  | -0.791669 | 1.714111  |
| H  | 6.541891  | -0.298260 | 3.066561  |
| C  | -0.130583 | -1.439342 | -1.983175 |
| C  | -1.413287 | -1.948867 | -1.966339 |
| C  | 0.948256  | -2.097503 | -1.332329 |
| C  | -1.692973 | -3.173507 | -1.331525 |
| C  | 0.664359  | -3.369583 | -0.779867 |
| C  | -0.625707 | -3.888754 | -0.775843 |
| C  | 2.233261  | -1.407707 | -1.173958 |
| C  | 3.485347  | -2.213009 | -0.810865 |
| H  | -0.825324 | -4.855544 | -0.307387 |
| H  | 1.465549  | -3.948284 | -0.315802 |
| H  | -2.218028 | -1.386015 | -2.441284 |
| H  | 0.030476  | -0.468139 | -2.456906 |
| Cu | 1.679751  | -0.045535 | 0.268596  |
| H  | 3.839804  | -2.828269 | -1.661824 |
| H  | 3.288836  | -2.911339 | 0.018300  |
| H  | 2.430282  | -0.761294 | -2.041205 |
| H  | -4.838670 | 1.194174  | -0.908864 |
| H  | -3.452635 | 0.089732  | -1.150364 |
| H  | -4.053269 | 1.091117  | -2.511910 |
| C  | -2.798391 | 5.022988  | -1.962900 |
| H  | -3.086502 | 5.749734  | -2.732020 |
| H  | -2.081628 | 5.489276  | -1.271055 |
| H  | -3.694678 | 4.709972  | -1.406335 |
| H  | -3.169371 | -1.528142 | 0.768137  |
| C  | -2.585485 | -0.894306 | 1.438596  |
| H  | -0.722695 | -1.785251 | 0.885203  |
| C  | -3.241122 | 0.078027  | 2.202092  |
| C  | -1.207380 | -1.034175 | 1.510179  |
| C  | -2.491661 | 0.895331  | 3.056179  |
| C  | -0.440708 | -0.199890 | 2.341765  |
| H  | -2.991770 | 1.652284  | 3.661634  |
| C  | -1.109538 | 0.755624  | 3.121649  |
| C  | 1.035422  | -0.265487 | 2.367312  |
| H  | -0.531160 | 1.413295  | 3.775519  |
| H  | 1.536060  | 0.523527  | 2.938068  |
| H  | 1.301718  | -2.248267 | 1.556908  |
| C  | 1.775758  | -1.326441 | 1.905825  |
| H  | 2.850649  | -1.375396 | 2.101691  |
| O  | -5.391520 | -0.483123 | 1.326114  |
| C  | -4.718753 | 0.207866  | 2.054986  |
| H  | -7.174294 | 0.464668  | 3.048871  |
| O  | -5.229055 | 1.176095  | 2.814774  |
| C  | -6.634668 | 1.372573  | 2.742747  |

|   |           |           |           |
|---|-----------|-----------|-----------|
| H | -6.941336 | 1.644378  | 1.722074  |
| H | -6.865946 | 2.192822  | 3.431734  |
| O | -3.356931 | -4.792801 | -0.760920 |
| C | -3.068362 | -3.689494 | -1.166158 |
| H | -5.543526 | -3.380981 | -0.222027 |
| O | -3.995951 | -2.769840 | -1.474266 |
| C | -5.352107 | -3.132805 | -1.275576 |
| H | -5.949628 | -2.259593 | -1.561590 |
| H | -5.627220 | -3.993948 | -1.902685 |

87

Figure 4\_para-CO2Me\_ts(AS)\_01 / electronic energy: -3964.02907638 a.u. / lowest freq: -190.00 cm-1

|    |           |           |           |
|----|-----------|-----------|-----------|
| C  | 0.333117  | 1.436836  | 0.703143  |
| C  | -0.082487 | 1.779294  | -0.617388 |
| C  | 0.832968  | 1.788864  | -1.660883 |
| O  | 1.908730  | 3.732297  | -1.694403 |
| F  | 2.829368  | 3.693453  | -0.486130 |
| O  | 3.330743  | 2.384990  | 0.054342  |
| O  | 4.063651  | 4.700306  | -0.847288 |
| O  | 2.106106  | 4.463453  | 0.769458  |
| C  | 5.115066  | 4.837750  | 0.083268  |
| H  | -0.382559 | 1.481145  | 1.527870  |
| H  | 1.383405  | 1.606443  | 0.962844  |
| H  | -1.130819 | 2.018484  | -0.820677 |
| H  | 1.846595  | 1.414614  | -1.507829 |
| H  | 0.508656  | 1.969857  | -2.685201 |
| B  | -1.583828 | -1.144209 | 2.248981  |
| O  | -2.736769 | -1.226934 | 1.518611  |
| O  | -1.664420 | -0.209866 | 3.246098  |
| C  | -3.611547 | -0.156442 | 1.930994  |
| C  | -3.041898 | 0.205722  | 3.353692  |
| C  | -5.046943 | -0.657124 | 1.923571  |
| C  | -3.453939 | 0.976312  | 0.920783  |
| C  | -3.670824 | -0.618407 | 4.474812  |
| C  | -3.088722 | 1.684497  | 3.700976  |
| H  | -3.644025 | -1.694857 | 4.248098  |
| H  | -4.715591 | -0.327034 | 4.653737  |
| H  | -3.105149 | -0.454442 | 5.403550  |
| H  | -2.504612 | 2.290331  | 2.995879  |
| H  | -2.672369 | 1.842593  | 4.706723  |
| H  | -4.126464 | 2.050152  | 3.700744  |
| H  | -2.443357 | 1.402287  | 0.948455  |
| H  | -4.171823 | 1.786698  | 1.111312  |
| H  | -3.637056 | 0.583919  | -0.088449 |
| H  | -5.721670 | 0.096746  | 2.356296  |
| H  | -5.155112 | -1.591916 | 2.488954  |
| H  | -5.371563 | -0.844283 | 0.889383  |
| C  | 3.250652  | -0.947633 | 0.767462  |
| C  | 4.441793  | -1.508885 | 0.332220  |
| C  | 2.136065  | -1.755065 | 1.090470  |
| C  | 4.570626  | -2.900965 | 0.206625  |
| C  | 2.284745  | -3.149237 | 0.974139  |
| C  | 3.479838  | -3.710634 | 0.538761  |
| C  | 0.852107  | -1.115013 | 1.485285  |
| C  | -0.296056 | -1.999476 | 1.960319  |
| H  | 3.580864  | -4.794329 | 0.449225  |
| H  | 1.452321  | -3.809001 | 1.225450  |
| H  | 5.281314  | -0.860418 | 0.076470  |
| H  | 3.175320  | 0.144036  | 0.818481  |
| Cu | 0.339935  | -0.285884 | -0.288329 |
| H  | -0.002228 | -2.530066 | 2.887911  |
| H  | -0.542264 | -2.779215 | 1.222468  |
| H  | 1.055304  | -0.330251 | 2.223251  |
| H  | 5.837753  | 5.557435  | -0.327546 |
| H  | 5.626459  | 3.877081  | 0.257845  |
| H  | 4.752625  | 5.220475  | 1.053213  |
| C  | 1.463501  | 5.695112  | 0.536760  |
| H  | 0.999583  | 6.020415  | 1.479169  |
| H  | 0.681217  | 5.603222  | -0.234738 |
| H  | 2.177420  | 6.472112  | 0.212179  |
| H  | -4.604095 | -2.429799 | -1.098866 |
| C  | -3.965623 | -1.721346 | -1.626473 |
| H  | -2.170208 | -2.771750 | -1.123492 |
| C  | -4.531358 | -0.616701 | -2.270537 |
| C  | -2.589665 | -1.906298 | -1.637519 |
| C  | -3.704703 | 0.287639  | -2.946729 |
| C  | -1.751186 | -0.995463 | -2.294680 |
| H  | -4.152307 | 1.146202  | -3.450018 |
| C  | -2.329272 | 0.098092  | -2.958441 |
| C  | -0.279887 | -1.148161 | -2.306794 |
| H  | -1.687159 | 0.811463  | -3.480672 |
| H  | 0.251719  | -0.545402 | -3.049237 |
| H  | 1.506977  | -2.160576 | -1.743729 |
| C  | 0.434409  | -2.043247 | -1.569087 |
| H  | -0.043493 | -2.788629 | -0.928333 |
| H  | -8.411157 | -1.786727 | -0.635144 |
| H  | -8.567112 | -1.108397 | -2.291548 |
| C  | -8.059121 | -1.008639 | -1.321663 |
| O  | -6.657959 | -1.206675 | -1.461575 |
| H  | -8.273206 | -0.015311 | -0.902007 |
| C  | -5.997728 | -0.338300 | -2.227258 |
| O  | -6.530293 | 0.581104  | -2.799599 |
| H  | 8.688330  | -2.346799 | -1.151368 |
| H  | 7.877496  | -3.725848 | -1.968261 |
| C  | 8.018774  | -3.203115 | -1.010740 |
| O  | 6.790311  | -2.674938 | -0.533985 |
| H  | 8.456285  | -3.903197 | -0.284042 |
| C  | 5.819147  | -3.552341 | -0.271520 |

O 5.955546 -4.745404 -0.414308

87

Figure 4\_para-CO2Me\_ts(AS)\_02 / electronic energy: -3964.02804325 a.u. / lowest freq: -184.57 cm<sup>-1</sup>

|    |           |           |           |
|----|-----------|-----------|-----------|
| C  | -0.648260 | -1.773198 | 0.177986  |
| C  | -0.578165 | -1.919115 | -1.238419 |
| C  | -1.634700 | -1.496786 | -2.037912 |
| O  | -3.138030 | -3.108695 | -2.164844 |
| P  | -3.819770 | -3.160545 | -0.807086 |
| O  | -3.837506 | -1.955146 | 0.088794  |
| O  | -5.330715 | -3.704058 | -1.106069 |
| O  | -3.176323 | -4.383347 | 0.075066  |
| C  | -6.231611 | -3.830131 | -0.027898 |
| H  | 0.158408  | -2.153477 | 0.809981  |
| H  | -1.645011 | -1.745397 | 0.630946  |
| H  | 0.311496  | -2.352848 | -1.705510 |
| H  | -2.477200 | -0.962124 | -1.598930 |
| H  | -1.550305 | -1.506068 | -3.124195 |
| B  | 1.956357  | -0.007794 | 1.939008  |
| O  | 3.092243  | -0.022108 | 1.179186  |
| O  | 1.823059  | -1.139685 | 2.698867  |
| C  | 3.698403  | -1.323301 | 1.295032  |
| C  | 3.063945  | -1.869780 | 2.629261  |
| C  | 5.210689  | -1.165523 | 1.326472  |
| C  | 3.292153  | -2.130568 | 0.064831  |
| C  | 3.871923  | -1.495667 | 3.870270  |
| C  | 2.763979  | -3.359775 | 2.629595  |
| H  | 4.102398  | -0.420041 | 3.891898  |
| H  | 4.816418  | -2.055872 | 3.922565  |
| H  | 3.281597  | -1.732794 | 4.767562  |
| H  | 2.055831  | -3.636094 | 1.837325  |
| H  | 2.320490  | -3.648633 | 3.593744  |
| H  | 3.688539  | -3.940266 | 2.492134  |
| H  | 2.201044  | -2.246162 | -0.004604 |
| H  | 3.747299  | -3.130906 | 0.073128  |
| H  | 3.635069  | -1.605260 | -0.836198 |
| H  | 5.695402  | -2.128768 | 1.545580  |
| H  | 5.528587  | -0.431949 | 2.078468  |
| H  | 5.569226  | -0.826545 | 0.343583  |
| C  | -2.861227 | 1.143322  | 0.954920  |
| C  | -3.910094 | 2.020801  | 0.721321  |
| C  | -1.562198 | 1.618074  | 1.251143  |
| C  | -3.708368 | 3.407765  | 0.785245  |
| C  | -1.379119 | 3.012625  | 1.326831  |
| C  | -2.433285 | 3.889822  | 1.098924  |
| C  | -0.449228 | 0.649794  | 1.427696  |
| C  | 0.895560  | 1.152187  | 1.934621  |
| H  | -2.277585 | 4.968662  | 1.165241  |
| H  | -0.397039 | 3.419102  | 1.576055  |
| H  | -4.898889 | 1.624822  | 0.484749  |
| H  | -3.054501 | 0.067552  | 0.875284  |
| Cu | -0.342911 | 0.064291  | -0.516866 |
| H  | 0.783908  | 1.541126  | 2.966569  |
| H  | 1.279924  | 1.984455  | 1.328148  |
| H  | -0.794522 | -0.192513 | 2.037449  |
| H  | -7.187062 | -4.196924 | -0.429574 |
| H  | -6.400330 | -2.861884 | 0.471050  |
| H  | -5.868042 | -4.550616 | 0.725351  |
| C  | -2.994121 | -5.640957 | -0.533494 |
| H  | -2.382486 | -6.261129 | 0.137932  |
| H  | -2.476953 | -5.545909 | -1.502257 |
| H  | -3.957508 | -6.153110 | -0.702998 |
| H  | 4.445642  | -0.150406 | -2.711194 |
| C  | 3.946621  | 0.657398  | -2.174682 |
| H  | 1.991101  | 0.049435  | -2.808301 |
| C  | 4.701830  | 1.559313  | -1.416593 |
| C  | 2.564584  | 0.776881  | -2.229181 |
| C  | 4.059774  | 2.600303  | -0.742641 |
| C  | 1.909941  | 1.798557  | -1.526482 |
| H  | 4.654258  | 3.304909  | -0.158976 |
| C  | 2.677802  | 2.716395  | -0.797227 |
| C  | 0.439387  | 1.936316  | -1.509016 |
| H  | 2.180065  | 3.526936  | -0.259732 |
| H  | 0.045488  | 2.684285  | -0.813850 |
| H  | -1.489210 | 1.604351  | -2.349362 |
| C  | -0.428633 | 1.336922  | -2.369470 |
| H  | -0.088239 | 0.723915  | -3.207296 |
| H  | -7.891376 | 4.013652  | -0.323838 |
| H  | -6.827609 | 5.347345  | -0.888987 |
| C  | -7.051233 | 4.664762  | -0.055988 |
| O  | -5.951536 | 3.806892  | 0.209153  |
| H  | -7.310665 | 5.259430  | 0.832349  |
| C  | -4.796466 | 4.390658  | 0.534817  |
| O  | -4.664103 | 5.590201  | 0.609718  |
| H  | 8.237194  | -0.902089 | -2.154738 |
| H  | 8.337686  | 0.029167  | -0.620579 |
| C  | 8.047444  | 0.067334  | -1.680425 |
| O  | 6.652813  | 0.308350  | -1.814277 |
| H  | 8.630882  | 0.851108  | -2.184880 |
| C  | 6.180645  | 1.428897  | -1.265986 |
| O  | 6.878586  | 2.230133  | -0.693350 |

87

Figure 4\_para-CO2Me\_ts(AS)\_03 / electronic energy: -3964.03280404 a.u. / lowest freq: -217.46 cm<sup>-1</sup>

|   |           |          |           |
|---|-----------|----------|-----------|
| C | 2.034752  | 1.374398 | -1.011573 |
| C | 1.771916  | 2.130468 | 0.166557  |
| C | 0.489282  | 2.217454 | 0.680661  |
| O | -0.584812 | 3.847258 | -0.383551 |
| P | -1.507491 | 3.107602 | -1.337330 |

|    |           |           |           |
|----|-----------|-----------|-----------|
| O  | -1.053818 | 1.869738  | -2.053407 |
| O  | -2.855112 | 2.791762  | -0.454092 |
| O  | -2.066850 | 4.149785  | -2.464009 |
| C  | -3.848092 | 1.943228  | -0.979120 |
| H  | 3.052077  | 1.332268  | -1.407592 |
| H  | 1.215264  | 1.289646  | -1.734494 |
| H  | 2.588685  | 2.637748  | 0.688301  |
| H  | -0.304060 | 1.588031  | 0.278266  |
| H  | 0.298063  | 2.718539  | 1.628351  |
| B  | 4.476848  | -1.237075 | -0.337851 |
| O  | 5.071051  | -1.271686 | 0.895717  |
| O  | 4.980059  | -0.243707 | -1.132167 |
| C  | 5.885315  | -0.089678 | 1.033274  |
| C  | 6.117658  | 0.338121  | -0.466080 |
| C  | 7.152541  | -0.438492 | 1.796348  |
| C  | 5.056412  | 0.918977  | 1.824453  |
| C  | 7.365006  | -0.287481 | -1.085536 |
| C  | 6.111997  | 1.839979  | -0.703681 |
| H  | 7.392107  | -1.375946 | -0.928391 |
| H  | 8.284899  | 0.149081  | -0.671339 |
| H  | 7.355415  | -0.102294 | -2.169523 |
| H  | 5.161124  | 2.299641  | -0.403202 |
| H  | 6.265294  | 2.046176  | -1.773099 |
| H  | 6.926100  | 2.324485  | -0.143973 |
| H  | 4.121128  | 1.161132  | 1.299324  |
| H  | 5.605901  | 1.854260  | 2.000760  |
| H  | 4.796357  | 0.485454  | 2.801428  |
| H  | 7.833368  | 0.425337  | 1.829704  |
| H  | 7.682266  | -1.284832 | 1.340414  |
| H  | 6.901761  | -0.712706 | 2.831672  |
| C  | -0.371880 | -1.314522 | -1.741441 |
| C  | -1.626088 | -1.902295 | -1.792838 |
| C  | 0.751410  | -2.027111 | -1.266077 |
| C  | -1.810420 | -3.230768 | -1.383593 |
| C  | 0.558354  | -3.371653 | -0.895959 |
| C  | -0.699664 | -3.963288 | -0.955748 |
| C  | 2.068561  | -1.341011 | -1.136563 |
| C  | 3.289492  | -2.175425 | -0.755402 |
| H  | -0.835447 | -5.003102 | -0.650836 |
| H  | 1.403752  | -3.968715 | -0.550383 |
| H  | -2.481238 | -1.314616 | -2.129110 |
| H  | -0.293385 | -0.259252 | -2.019541 |
| Cu | 1.649512  | -0.017689 | 0.360163  |
| H  | 3.588230  | -2.818987 | -1.606009 |
| H  | 3.075670  | -2.851372 | 0.086312  |
| H  | 2.273429  | -0.782481 | -2.056578 |
| H  | -4.760356 | 2.083035  | -0.380872 |
| H  | -3.548384 | 0.883417  | -0.927537 |
| H  | -4.087734 | 2.184041  | -2.029048 |
| C  | -2.493533 | 5.432007  | -2.062507 |
| H  | -2.883176 | 5.950533  | -2.950198 |
| H  | -1.662478 | 6.019870  | -1.639950 |
| H  | -3.296784 | 5.375894  | -1.307631 |
| H  | -3.355856 | -1.902562 | 0.811990  |
| C  | -2.794246 | -1.185539 | 1.412292  |
| H  | -0.918468 | -2.173227 | 1.114884  |
| C  | -3.469779 | -0.097034 | 1.971919  |
| C  | -1.424340 | -1.328151 | 1.583806  |
| C  | -2.760437 | 0.841103  | 2.728347  |
| C  | -0.699405 | -0.379458 | 2.319673  |
| H  | -3.278286 | 1.694530  | 3.166224  |
| C  | -1.390167 | 0.692337  | 2.904234  |
| C  | 0.774038  | -0.436018 | 2.457550  |
| H  | -0.838027 | 1.435897  | 3.483954  |
| H  | 1.218686  | 0.363313  | 3.060224  |
| H  | 1.188444  | -2.338397 | 1.541626  |
| C  | 1.585948  | -1.431205 | 2.003469  |
| H  | 2.651321  | -1.430449 | 2.254488  |
| O  | -5.587424 | -0.790693 | 1.108523  |
| C  | -4.935358 | 0.026387  | 1.713024  |
| H  | -7.438052 | 0.581504  | 2.493210  |
| O  | -5.450467 | 1.145365  | 2.217951  |
| C  | -6.838827 | 1.365334  | 2.007482  |
| H  | -7.074814 | 1.383165  | 0.933726  |
| H  | -7.065469 | 2.338975  | 2.455974  |
| O  | -3.352978 | -5.024956 | -1.036364 |
| C  | -3.153940 | -3.865659 | -1.315912 |
| H  | -5.654429 | -3.823953 | -0.402068 |
| O  | -4.136581 | -2.995932 | -1.559614 |
| C  | -5.467650 | -3.469474 | -1.425624 |
| H  | -6.120877 | -2.618725 | -1.647606 |
| H  | -5.667385 | -4.288681 | -2.131891 |

87

Figure 4\_para-CO2Me\_ts(AS)\_04 / electronic energy: -3964.02741833 a.u. / lowest freq: -157.56 cm<sup>-1</sup>

|   |           |          |           |
|---|-----------|----------|-----------|
| C | -1.195792 | 1.524242 | 1.057283  |
| C | -0.946814 | 2.351096 | -0.070091 |
| C | 0.222997  | 2.240497 | -0.796044 |
| O | 1.744777  | 3.807541 | -0.125902 |
| P | 2.800476  | 3.174204 | 0.757907  |
| O | 2.459341  | 2.459156 | 2.026814  |
| O | 3.640448  | 2.167181 | -0.249419 |
| O | 3.940746  | 4.294463 | 1.118253  |
| C | 4.756058  | 1.478755 | 0.263708  |
| H | -2.115659 | 1.676007 | 1.624693  |
| H | -0.350433 | 1.094716 | 1.609541  |
| H | -1.726537 | 3.034556 | -0.420087 |
| H | 0.991833  | 1.516508 | -0.523994 |

|    |            |           |           |
|----|------------|-----------|-----------|
| H  | 0.340448   | 2.753180  | -1.748305 |
| B  | -0.476414  | -1.574774 | 2.322493  |
| O  | 0.477703   | -0.652300 | 2.650369  |
| O  | 0.055324   | -2.807950 | 2.065720  |
| C  | 1.766115   | -1.226556 | 2.345400  |
| C  | 1.455582   | -2.763104 | 2.426909  |
| C  | 2.787320   | -0.696960 | 3.336176  |
| C  | 2.127948   | -0.766664 | 0.936715  |
| C  | 1.572919   | -3.320272 | 3.843140  |
| C  | 2.247121   | -3.619173 | 1.453577  |
| H  | 1.024063   | -2.699571 | 4.567034  |
| H  | 2.622764   | -3.383125 | 4.163709  |
| H  | 1.144009   | -4.332777 | 3.869509  |
| H  | 2.022743   | -3.354975 | 0.412600  |
| H  | 2.001347   | -4.681794 | 1.597727  |
| H  | 3.328092   | -3.495330 | 1.616891  |
| H  | 1.379656   | -1.102934 | 0.203205  |
| H  | 3.106418   | -1.155004 | 0.621512  |
| H  | 2.177636   | 0.330166  | 0.939074  |
| H  | 3.768580   | -1.167297 | 3.168271  |
| H  | 2.484724   | -0.883628 | 4.375300  |
| H  | 2.882698   | 0.389334  | 3.183178  |
| C  | -4.535062  | -1.176637 | -0.614193 |
| C  | -5.850501  | -0.822795 | -0.882033 |
| C  | -3.832398  | -0.645580 | 0.486941  |
| C  | -6.523643  | 0.077318  | -0.045687 |
| C  | -4.536107  | 0.234587  | 1.332998  |
| C  | -5.851766  | 0.592185  | 1.069086  |
| C  | -2.411156  | -1.015682 | 0.726170  |
| C  | -1.998856  | -1.211781 | 2.187591  |
| H  | -6.380086  | 1.279341  | 1.733221  |
| H  | -4.048009  | 0.646517  | 2.218508  |
| H  | -6.366042  | -1.253835 | -1.741544 |
| H  | -4.036279  | -1.897266 | -1.266525 |
| Cu | -1.377723  | 0.257811  | -0.464963 |
| H  | -2.617552  | -2.017557 | 2.625105  |
| H  | -2.191760  | -0.310533 | 2.789445  |
| H  | -2.173823  | -1.929121 | 0.158087  |
| H  | 5.032608   | 0.683999  | -0.444788 |
| H  | 4.538633   | 1.021721  | 1.243076  |
| H  | 5.622550   | 2.152712  | 0.385459  |
| C  | 4.403162   | 5.152004  | 0.102639  |
| H  | 5.246709   | 5.730850  | 0.506452  |
| H  | 3.617626   | 5.851446  | -0.228082 |
| H  | 4.756453   | 4.590528  | -0.780189 |
| H  | 2.542129   | -3.532008 | -1.982754 |
| C  | 2.353682   | -2.479196 | -2.198266 |
| H  | 0.227834   | -2.721100 | -2.273287 |
| C  | 3.436035   | -1.595846 | -2.282951 |
| C  | 1.056275   | -2.015573 | -2.360450 |
| C  | 3.209197   | -0.251920 | -2.588273 |
| C  | 0.815624   | -0.656507 | -2.620918 |
| H  | 4.044649   | 0.443110  | -2.666184 |
| C  | 1.909639   | 0.207348  | -2.763920 |
| C  | -0.547576  | -0.096083 | -2.716218 |
| H  | 1.743512   | 1.261826  | -2.989469 |
| H  | -0.612794  | 0.918000  | -3.122376 |
| H  | -1.723722  | -1.808652 | -2.155952 |
| C  | -1.702344  | -0.751546 | -2.432067 |
| H  | -2.662898  | -0.275575 | -2.649879 |
| O  | 5.028979   | -3.245239 | -1.611657 |
| C  | 4.802557   | -2.120330 | -1.986323 |
| H  | 7.401971   | -2.440076 | -2.413709 |
| O  | 5.747399   | -1.197741 | -2.156857 |
| C  | 7.080729   | -1.566136 | -1.829441 |
| H  | 7.169739   | -1.795523 | -0.757595 |
| H  | 7.706666   | -0.701275 | -2.076442 |
| O  | -8.540532  | 1.269976  | 0.416008  |
| C  | -7.929692  | 0.499619  | -0.287066 |
| H  | -9.901116  | 1.359248  | -1.864013 |
| O  | -8.456285  | -0.063590 | -1.376627 |
| C  | -9.798349  | 0.278206  | -1.689770 |
| H  | -10.050268 | -0.269659 | -2.605121 |
| H  | -10.480831 | -0.017926 | -0.879755 |

87

Figure 4\_para-CO2Me\_pi-allyl\_01 / electronic energy: -3964.04377838 a.u. / lowest freq: 17.67 cm-1

|   |           |           |           |
|---|-----------|-----------|-----------|
| C | 0.046643  | 1.811794  | 0.879397  |
| C | -0.562366 | 2.336395  | -0.317465 |
| C | 0.156098  | 2.468144  | -1.474901 |
| O | 3.230647  | 2.104601  | -1.393240 |
| P | 3.820705  | 2.571567  | -0.090882 |
| O | 3.046470  | 2.534985  | 1.200431  |
| O | 5.235107  | 1.746549  | 0.089892  |
| O | 4.370518  | 4.113046  | -0.240538 |
| C | 5.979716  | 1.933615  | 1.269101  |
| H | -0.587232 | 1.674686  | 1.758785  |
| H | 1.112261  | 2.042839  | 1.062664  |
| H | -1.651087 | 2.456296  | -0.351411 |
| H | 1.260037  | 2.395663  | -1.487011 |
| H | -0.352928 | 2.752120  | -2.399690 |
| B | -2.052615 | -0.796363 | 1.906709  |
| O | -3.297010 | -0.898175 | 1.355797  |
| O | -2.020925 | 0.056587  | 2.976888  |
| C | -4.144417 | 0.089480  | 1.979139  |
| C | -3.387413 | 0.365943  | 3.329964  |
| C | -5.542489 | -0.487458 | 2.125686  |
| C | -4.170826 | 1.307797  | 1.061642  |



|    |           |           |           |
|----|-----------|-----------|-----------|
| C  | -3.788331 | -0.595578 | 4.445852  |
| C  | -3.462235 | 1.800887  | 3.823801  |
| H  | -3.748094 | -1.643053 | 4.111177  |
| H  | -4.803212 | -0.385899 | 4.812545  |
| H  | -3.087695 | -0.481521 | 5.285792  |
| H  | -3.032849 | 2.508400  | 3.102612  |
| H  | -2.905412 | 1.898391  | 4.767254  |
| H  | -4.507072 | 2.087510  | 4.015628  |
| H  | -3.173816 | 1.762071  | 0.972915  |
| H  | -4.868060 | 2.073935  | 1.428863  |
| H  | -4.494331 | 0.999286  | 0.058230  |
| H  | -6.192158 | 0.204613  | 2.682034  |
| H  | -5.531381 | -1.453876 | 2.646392  |
| H  | -5.981439 | -0.644478 | 1.128922  |
| C  | 2.939510  | -0.757246 | 0.893464  |
| C  | 4.133828  | -1.364823 | 0.532949  |
| C  | 1.727521  | -1.471467 | 0.879131  |
| C  | 4.157740  | -2.719762 | 0.176224  |
| C  | 1.764854  | -2.832946 | 0.529768  |
| C  | 2.963431  | -3.448222 | 0.188890  |
| C  | 0.459177  | -0.767382 | 1.230354  |
| C  | -0.800391 | -1.601784 | 1.404268  |
| H  | 2.985869  | -4.507221 | -0.076358 |
| H  | 0.846409  | -3.422646 | 0.525098  |
| H  | 5.048260  | -0.771546 | 0.510590  |
| H  | 2.935655  | 0.303663  | 1.164014  |
| Cu | 0.183599  | 0.334176  | -0.453991 |
| H  | -0.605126 | -2.371976 | 2.179252  |
| H  | -1.062442 | -2.160161 | 0.492796  |
| H  | 0.636482  | -0.143968 | 2.112292  |
| H  | 6.928948  | 1.387910  | 1.161746  |
| H  | 5.447572  | 1.551325  | 2.156327  |
| H  | 6.208817  | 2.999816  | 1.442799  |
| C  | 5.126632  | 4.451576  | -1.376754 |
| H  | 5.329429  | 5.532404  | -1.343729 |
| H  | 4.584271  | 4.219082  | -2.308588 |
| H  | 6.092148  | 3.915372  | -1.399947 |
| H  | -4.512185 | -2.244083 | -1.326707 |
| C  | -3.983964 | -1.416823 | -1.799506 |
| H  | -2.067423 | -2.337417 | -1.558036 |
| C  | -4.695230 | -0.305157 | -2.259774 |
| C  | -2.601694 | -1.459621 | -1.924779 |
| C  | -4.010004 | 0.753016  | -2.866630 |
| C  | -1.901871 | -0.391142 | -2.502424 |
| H  | -4.572839 | 1.614722  | -3.229369 |
| C  | -2.627274 | 0.709110  | -2.986315 |
| C  | -0.425491 | -0.374611 | -2.598883 |
| H  | -2.096095 | 1.542827  | -3.450905 |
| H  | -0.002519 | 0.386780  | -3.260953 |
| H  | 1.493496  | -1.211911 | -2.208508 |
| C  | 0.419939  | -1.256901 | -2.004922 |
| H  | 0.056803  | -2.125531 | -1.451766 |
| H  | -8.324026 | -2.046413 | -0.554656 |
| H  | -8.663428 | -1.203588 | -2.104455 |
| C  | -8.095552 | -1.164451 | -1.163498 |
| O  | -6.697251 | -1.207434 | -1.417632 |
| H  | -8.367998 | -0.249636 | -0.618143 |
| C  | -6.173931 | -0.181410 | -2.087143 |
| O  | -6.825370 | 0.752357  | -2.487631 |
| H  | 8.462224  | -2.393685 | -0.515791 |
| H  | 7.677710  | -3.605335 | -1.584331 |
| C  | 7.720309  | -3.199028 | -0.563305 |
| O  | 6.477456  | -2.620871 | -0.193562 |
| H  | 8.001647  | -4.004687 | 0.130661  |
| C  | 5.410779  | -3.421092 | -0.218092 |
| O  | 5.469704  | -4.587770 | -0.529785 |

87

Figure 4 para-CO2Me\_pi-allyl\_02 / electronic energy: -3964.03936221 a.u. / lowest freq: 10.51 cm<sup>-1</sup>

|   |           |           |           |
|---|-----------|-----------|-----------|
| C | 2.144889  | 1.521265  | -0.881065 |
| C | 2.096421  | 2.092430  | 0.439418  |
| C | 0.925334  | 2.116453  | 1.143178  |
| O | -0.391163 | 4.579275  | -0.630740 |
| P | -1.209473 | 3.489475  | -1.243105 |
| O | -0.599890 | 2.307202  | -1.954375 |
| O | -2.202850 | 2.928489  | -0.041483 |
| O | -2.319889 | 4.102457  | -2.294022 |
| C | -3.089447 | 1.876933  | -0.330295 |
| H | 3.118913  | 1.442287  | -1.366957 |
| H | 1.258048  | 1.700774  | -1.510106 |
| H | 3.031038  | 2.353403  | 0.947152  |
| H | -0.033547 | 1.913575  | 0.653659  |
| H | 0.899825  | 2.453385  | 2.181607  |
| B | 4.379033  | -1.215294 | -0.549335 |
| O | 4.966950  | -1.614109 | 0.619450  |
| O | 4.946167  | -0.084914 | -1.064045 |
| C | 5.859299  | -0.568691 | 1.053460  |
| C | 6.115091  | 0.234329  | -0.280530 |
| C | 7.102870  | -1.193626 | 1.664063  |
| C | 5.101984  | 0.231872  | 2.111033  |
| C | 7.323887  | -0.267185 | -1.066150 |
| C | 6.192352  | 1.742014  | -0.105370 |
| H | 7.284846  | -1.356409 | -1.215751 |
| H | 8.267226  | -0.016984 | -0.560670 |
| H | 7.327923  | 0.210706  | -2.056438 |
| H | 5.267550  | 2.153172  | 0.320169  |
| H | 6.357129  | 2.221769  | -1.081208 |
| H | 7.030926  | 2.013316  | 0.553136  |

|    |           |           |           |
|----|-----------|-----------|-----------|
| H  | 4.172946  | 0.654253  | 1.700791  |
| H  | 5.709036  | 1.053544  | 2.515916  |
| H  | 4.832531  | -0.435634 | 2.943035  |
| H  | 7.834014  | -0.416585 | 1.932183  |
| H  | 7.580803  | -1.904006 | 0.977370  |
| H  | 6.833739  | -1.737303 | 2.581485  |
| C  | -0.515379 | -0.836459 | -1.857703 |
| C  | -1.791028 | -1.374143 | -1.965441 |
| C  | 0.589908  | -1.653315 | -1.541058 |
| C  | -2.008842 | -2.743235 | -1.772695 |
| C  | 0.362310  | -3.032430 | -1.377613 |
| C  | -0.915507 | -3.568859 | -1.495568 |
| C  | 1.947029  | -1.041071 | -1.394696 |
| C  | 3.140850  | -1.958687 | -1.169716 |
| H  | -1.079565 | -4.639458 | -1.357396 |
| H  | 1.193164  | -3.704414 | -1.157672 |
| H  | -2.632136 | -0.716371 | -2.187679 |
| H  | -0.402574 | 0.247088  | -1.986822 |
| Cu | 1.585880  | 0.014449  | 0.316613  |
| H  | 3.429269  | -2.415529 | -2.135693 |
| H  | 2.892471  | -2.790251 | -0.495384 |
| H  | 2.132098  | -0.376088 | -2.242532 |
| H  | -3.873133 | 1.866881  | 0.442057  |
| H  | -2.581237 | 0.897766  | -0.321042 |
| H  | -3.575955 | 2.004921  | -1.312913 |
| C  | -3.061284 | 5.228695  | -1.897929 |
| H  | -3.594814 | 5.618522  | -2.777781 |
| H  | -2.407343 | 6.021177  | -1.497078 |
| H  | -3.806734 | 4.973751  | -1.122782 |
| H  | -3.423832 | -2.304206 | 0.952042  |
| C  | -2.836936 | -1.573614 | 1.510111  |
| H  | -0.963202 | -2.500110 | 1.045405  |
| C  | -3.494665 | -0.517973 | 2.148009  |
| C  | -1.454372 | -1.677944 | 1.568301  |
| C  | -2.753989 | 0.423914  | 2.868537  |
| C  | -0.700764 | -0.728626 | 2.273733  |
| H  | -3.259428 | 1.252382  | 3.365249  |
| C  | -1.370427 | 0.312875  | 2.932560  |
| C  | 0.776303  | -0.779804 | 2.340926  |
| H  | -0.796119 | 1.055473  | 3.491075  |
| H  | 1.236824  | -0.070688 | 3.036691  |
| H  | 1.169398  | -2.510722 | 1.131522  |
| C  | 1.578919  | -1.685123 | 1.717985  |
| H  | 2.651883  | -1.713139 | 1.929942  |
| O  | -5.656624 | -1.249113 | 1.438975  |
| C  | -4.977552 | -0.420000 | 1.995010  |
| H  | -7.428657 | 0.091872  | 2.913307  |
| O  | -5.471663 | 0.696160  | 2.526120  |
| C  | -6.874929 | 0.897141  | 2.409406  |
| H  | -7.176158 | 0.936058  | 1.352782  |
| H  | -7.087210 | 1.856997  | 2.893121  |
| O  | -3.602624 | -4.522022 | -1.665585 |
| C  | -3.373252 | -3.342029 | -1.792121 |
| H  | -5.866977 | -3.388163 | -0.918829 |
| O  | -4.326674 | -2.422296 | -1.932448 |
| C  | -5.672628 | -2.870194 | -1.868047 |
| H  | -6.296939 | -1.972120 | -1.933341 |
| H  | -5.902203 | -3.548064 | -2.703325 |

28

Figure 5\_L-Cu-OtBu / electronic energy: -2105.43166785 a.u. / lowest freq: -23.37 cm<sup>-1</sup>

|    |           |           |           |
|----|-----------|-----------|-----------|
| H  | -2.704480 | -2.048822 | 0.818816  |
| H  | -4.301582 | -1.101667 | -0.940475 |
| C  | -2.658666 | -1.043988 | 1.268837  |
| C  | -4.196671 | -0.108356 | -0.475492 |
| H  | -3.439797 | -0.974757 | 2.045007  |
| H  | -5.015485 | 0.023598  | 0.251074  |
| H  | -1.676412 | -0.941768 | 1.762027  |
| H  | -4.312650 | 0.645511  | -1.270500 |
| C  | -2.805351 | 0.023588  | 0.167675  |
| C  | -2.678464 | 1.420447  | 0.804762  |
| H  | -3.458897 | 1.625661  | 1.557187  |
| H  | -1.695054 | 1.520794  | 1.296165  |
| H  | -2.738503 | 2.192609  | 0.020881  |
| O  | -1.860689 | -0.155323 | -0.825869 |
| C  | 3.997368  | 0.783125  | 0.130748  |
| C  | 3.914366  | -0.658005 | 0.635704  |
| C  | 2.535325  | 1.194497  | 0.096251  |
| H  | 4.429490  | 0.814026  | -0.881402 |
| H  | 4.594999  | 1.436575  | 0.780124  |
| C  | 2.666910  | -1.177468 | -0.061207 |
| H  | 3.776910  | -0.674927 | 1.727899  |
| H  | 4.802507  | -1.255885 | 0.391071  |
| O  | 1.827463  | -0.017513 | -0.220858 |
| H  | 2.297263  | 1.943006  | -0.671740 |
| H  | 2.184472  | 1.562885  | 1.074344  |
| H  | 2.115269  | -1.930463 | 0.518555  |
| H  | 2.884068  | -1.587009 | -1.060647 |
| Cu | -0.073283 | -0.085163 | -0.498215 |

70

Figure 5\_ed / electronic energy: -2927.19598297 a.u. / lowest freq: 14.28 cm<sup>-1</sup>

|   |           |           |           |
|---|-----------|-----------|-----------|
| H | -1.175057 | -3.260504 | -0.875513 |
| H | -2.758073 | -2.528487 | -0.577961 |
| O | -0.831969 | -1.279630 | 0.898288  |
| C | -1.983838 | -3.164248 | -0.134233 |
| H | -2.403083 | -4.164716 | 0.057389  |
| C | -1.439752 | -2.546730 | 1.154625  |
| H | 0.474500  | -3.570309 | 0.976696  |

|    |           |           |           |
|----|-----------|-----------|-----------|
| H  | -3.308769 | -1.688114 | 1.852845  |
| C  | -0.334327 | -3.443678 | 1.718263  |
| C  | -2.540690 | -2.385060 | 2.203933  |
| H  | 0.098924  | -2.999031 | 2.627896  |
| H  | -0.722533 | -4.442337 | 1.971545  |
| H  | -2.117476 | -1.970960 | 3.132259  |
| H  | -3.003887 | -3.357017 | 2.435674  |
| Cu | 0.984487  | -1.242903 | 0.168791  |
| H  | 0.669959  | 4.643374  | 1.521621  |
| H  | 2.425783  | 3.393077  | 2.809754  |
| H  | 0.749046  | 2.781327  | 2.894655  |
| C  | 1.783144  | 2.519610  | 2.626715  |
| H  | 2.207553  | 4.848748  | 0.637258  |
| H  | 2.109677  | 1.707154  | 3.292461  |
| C  | 1.174695  | 4.475441  | 0.561298  |
| H  | 0.653825  | 5.070708  | -0.203343 |
| C  | 1.157667  | 3.007406  | 0.169061  |
| C  | 1.875496  | 2.047240  | 1.178177  |
| O  | -0.192783 | 2.521686  | 0.196703  |
| H  | 3.932554  | 2.610774  | 0.773896  |
| B  | -0.189178 | 1.185777  | 0.545746  |
| H  | 3.740918  | 1.042499  | 1.591803  |
| C  | 3.312724  | 1.702744  | 0.822677  |
| O  | 1.068487  | 0.860624  | 1.067205  |
| H  | 2.675063  | 3.244254  | -1.394788 |
| C  | 1.662300  | 2.835556  | -1.264361 |
| H  | 0.986290  | 3.367235  | -1.949610 |
| H  | 3.371050  | 1.183711  | -0.142557 |
| H  | 1.670432  | 1.773932  | -1.555875 |
| H  | -3.864946 | -1.340641 | -2.304587 |
| H  | -4.450843 | -1.469203 | -0.163670 |
| H  | -2.974818 | -0.387599 | -3.506701 |
| C  | -3.619981 | -0.316489 | -2.616867 |
| O  | -1.747189 | -0.261794 | -1.137911 |
| H  | -5.643664 | -0.279988 | -0.744294 |
| C  | -4.827002 | -0.446941 | -0.025039 |
| H  | -4.551587 | 0.188565  | -2.917037 |
| B  | -1.458479 | -0.008497 | 0.282035  |
| H  | -5.253886 | -0.381373 | 0.988040  |
| C  | -2.888981 | 0.458159  | -1.520188 |
| C  | -3.710563 | 0.596533  | -0.164003 |
| O  | -2.749982 | 0.379990  | 0.844040  |
| H  | -1.776071 | 1.623721  | -2.949543 |
| C  | -2.454537 | 1.813189  | -2.102190 |
| H  | -3.305205 | 2.404818  | -2.474172 |
| H  | -1.898632 | 2.405668  | -1.364497 |
| H  | -5.055815 | 2.224942  | -0.756934 |
| C  | -4.333737 | 1.980105  | 0.038349  |
| H  | -4.869958 | 2.004137  | 0.999953  |
| H  | -3.565105 | 2.763531  | 0.067734  |
| H  | 3.925937  | -2.905807 | 0.289671  |
| H  | 5.988558  | -1.948788 | -0.572086 |
| H  | 3.859037  | -1.294296 | 1.066346  |
| C  | 3.914546  | -1.819371 | 0.102686  |
| C  | 5.073285  | -1.376870 | -0.774980 |
| H  | 4.581688  | -2.664903 | -2.455034 |
| H  | 5.288929  | -0.309454 | -0.610680 |
| O  | 2.738029  | -1.499689 | -0.658096 |
| C  | 4.515218  | -1.600641 | -2.181044 |
| H  | 5.030876  | -1.013749 | -2.952708 |
| C  | 3.061263  | -1.183915 | -2.022280 |
| H  | 2.921481  | -0.101380 | -2.177043 |
| H  | 2.367160  | -1.727464 | -2.678136 |

70

Figure 5\_ts(TB) / electronic energy: -2927.19056412 a.u. / lowest freq: -26.17 cm<sup>-1</sup>

|    |           |           |           |
|----|-----------|-----------|-----------|
| H  | -1.569892 | -3.716781 | -0.629179 |
| H  | -3.010279 | -2.804981 | -0.142745 |
| O  | -0.692215 | -1.651377 | 0.849583  |
| C  | -2.214090 | -3.463995 | 0.225980  |
| H  | -2.671935 | -4.390854 | 0.606459  |
| C  | -1.398901 | -2.787145 | 1.328881  |
| H  | 0.355236  | -4.022784 | 1.006152  |
| H  | -3.045730 | -1.622707 | 2.136656  |
| C  | -0.317582 | -3.743014 | 1.833042  |
| C  | -2.303874 | -2.353977 | 2.483612  |
| H  | 0.286871  | -3.255178 | 2.613450  |
| H  | -0.753242 | -4.662344 | 2.253464  |
| H  | -1.705834 | -1.874761 | 3.273698  |
| H  | -2.831570 | -3.216795 | 2.920158  |
| Cu | 1.007254  | -1.058612 | -0.206431 |
| H  | -0.671057 | 4.362707  | -0.319158 |
| H  | -0.406165 | 4.317703  | 2.144214  |
| H  | -1.310203 | 2.944934  | 1.427031  |
| C  | -0.441556 | 3.223242  | 2.039293  |
| H  | 0.884488  | 5.169378  | 0.023585  |
| H  | -0.587365 | 2.785506  | 3.038010  |
| C  | 0.409833  | 4.331379  | -0.509824 |
| H  | 0.568529  | 4.483828  | -1.588010 |
| C  | 1.015403  | 3.004514  | -0.080340 |
| C  | 0.849303  | 2.665990  | 1.440897  |
| O  | 0.298743  | 1.932493  | -0.708371 |
| H  | 2.226273  | 4.128932  | 2.262897  |
| B  | 0.236938  | 0.858200  | 0.166747  |
| H  | 1.831106  | 2.785331  | 3.359777  |
| C  | 2.037958  | 3.045331  | 2.310818  |
| O  | 0.718108  | 1.237236  | 1.412237  |
| H  | 3.080359  | 3.737077  | -0.173842 |

|   |           |           |           |
|---|-----------|-----------|-----------|
| C | 2.466657  | 2.907484  | -0.554382 |
| H | 2.487645  | 2.940600  | -1.653884 |
| H | 2.951808  | 2.517470  | 2.007212  |
| H | 2.922310  | 1.958284  | -0.234434 |
| H | -4.165840 | -1.611863 | -1.763487 |
| H | -4.344466 | -1.073229 | 0.341867  |
| H | -3.334671 | -1.262479 | -3.291899 |
| C | -3.763270 | -0.803589 | -2.387761 |
| O | -1.663105 | -0.887847 | -1.252578 |
| H | -5.327152 | 0.238935  | -0.360964 |
| C | -4.444217 | 0.017883  | 0.257717  |
| H | -4.598209 | -0.157456 | -2.700795 |
| B | -1.144385 | -0.509690 | 0.039023  |
| H | -4.626537 | 0.417683  | 1.266928  |
| C | -2.680210 | -0.002905 | -1.664529 |
| C | -3.170249 | 0.657267  | -0.302370 |
| O | -2.120673 | 0.390964  | 0.613361  |
| H | -1.669707 | 0.448664  | -3.510396 |
| C | -2.087006 | 1.005727  | -2.656853 |
| H | -2.845647 | 1.701268  | -3.047132 |
| H | -1.271798 | 1.579597  | -2.199064 |
| H | -4.144851 | 2.427079  | -1.136669 |
| C | -3.376074 | 2.168241  | -0.392270 |
| H | -3.708614 | 2.557123  | 0.582629  |
| H | -2.440329 | 2.675800  | -0.660373 |
| H | 3.885242  | -2.856640 | 0.678618  |
| H | 6.009881  | -1.750590 | 0.290632  |
| H | 3.492020  | -1.236229 | 1.331115  |
| C | 3.830334  | -1.782680 | 0.439190  |
| C | 5.131956  | -1.253926 | -0.143437 |
| H | 5.161946  | -2.583722 | -1.864733 |
| H | 5.223231  | -0.172190 | 0.040682  |
| O | 2.856037  | -1.605969 | -0.607928 |
| C | 4.956200  | -1.526078 | -1.637518 |
| H | 5.601067  | -0.903892 | -2.272341 |
| C | 3.483515  | -1.217127 | -1.843418 |
| H | 3.306016  | -0.141402 | -2.009870 |
| H | 3.013986  | -1.783541 | -2.659399 |

70

Figure 5\_prod / electronic energy: -2927.22806183 a.u. / lowest freq: 30.94 cm<sup>-1</sup>

|    |           |           |           |
|----|-----------|-----------|-----------|
| H  | 3.276020  | 1.755768  | 2.085458  |
| H  | 4.029585  | 0.342406  | 2.870323  |
| O  | 2.186270  | -0.435275 | 1.195410  |
| C  | 3.123653  | 0.966737  | 2.837008  |
| H  | 2.996757  | 1.447150  | 3.818481  |
| C  | 1.900274  | 0.124848  | 2.486768  |
| H  | 0.785061  | 1.788148  | 1.647191  |
| H  | 2.606840  | -1.652978 | 3.520826  |
| C  | 0.653062  | 1.000085  | 2.404111  |
| C  | 1.720913  | -0.998914 | 3.508200  |
| H  | -0.229847 | 0.414028  | 2.115866  |
| H  | 0.455099  | 1.479355  | 3.374955  |
| H  | 0.838651  | -1.609358 | 3.270249  |
| H  | 1.588934  | -0.579495 | 4.516801  |
| Cu | 0.228770  | 1.485133  | -1.025090 |
| H  | -4.112538 | -1.553581 | -0.051977 |
| H  | -4.181854 | -0.522862 | 2.151820  |
| H  | -2.539314 | -0.725474 | 1.467049  |
| C  | -3.261673 | 0.005224  | 1.860192  |
| H  | -5.640312 | -0.636108 | -0.088647 |
| H  | -2.826043 | 0.454346  | 2.765227  |
| C  | -4.659559 | -0.758976 | -0.574180 |
| H  | -4.833675 | -1.092503 | -1.608478 |
| C  | -3.896862 | 0.557419  | -0.578139 |
| C  | -3.533059 | 1.111883  | 0.838971  |
| O  | -2.600100 | 0.368422  | -1.163982 |
| H  | -5.520232 | 1.650713  | 1.532227  |
| B  | -1.677503 | 1.204260  | -0.531009 |
| H  | -4.188232 | 2.454088  | 2.397674  |
| C  | -4.528130 | 2.112138  | 1.408299  |
| O  | -2.284734 | 1.770599  | 0.588081  |
| H  | -5.673565 | 1.731530  | -1.102658 |
| C  | -4.639451 | 1.576641  | -1.444563 |
| H  | -4.671868 | 1.207454  | -2.480550 |
| H  | -4.630508 | 2.996419  | 0.765511  |
| H  | -4.121387 | 2.547036  | -1.449024 |
| H  | 1.991771  | -4.512916 | -1.086183 |
| H  | 1.305285  | -4.178282 | 1.089125  |
| H  | 2.028714  | -3.696802 | -2.664482 |
| C  | 1.386498  | -3.947929 | -1.807071 |
| O  | 1.897198  | -1.916146 | -0.619569 |
| H  | -0.018969 | -5.074783 | 0.295167  |
| C  | 0.233316  | -4.154066 | 0.840600  |
| H  | 0.575396  | -4.596962 | -2.170296 |
| B  | 1.419007  | -1.323079 | 0.525768  |
| H  | -0.333300 | -4.149529 | 1.783495  |
| C  | 0.821401  | -2.673747 | -1.199492 |
| C  | -0.127613 | -2.905924 | 0.038000  |
| O  | 0.170295  | -1.771803 | 0.874043  |
| H  | 0.952484  | -1.547462 | -3.030190 |
| C  | 0.185587  | -1.811182 | -2.286381 |
| H  | -0.624374 | -2.342022 | -2.806942 |
| H  | -0.222943 | -0.877171 | -1.869541 |
| H  | -1.839210 | -3.682865 | -1.037073 |
| C  | -1.606657 | -2.896469 | -0.302760 |
| H  | -2.198501 | -3.097093 | 0.603125  |
| H  | -1.911048 | -1.923653 | -0.710116 |

|   |          |           |           |
|---|----------|-----------|-----------|
| H | 2.432321 | 2.911576  | 0.379233  |
| H | 4.814424 | 3.067535  | 0.084388  |
| H | 2.435795 | 3.905435  | -1.105554 |
| C | 2.767246 | 2.951850  | -0.669479 |
| C | 4.265867 | 2.709663  | -0.797740 |
| H | 4.227949 | 0.676294  | -0.021505 |
| H | 4.667130 | 3.227209  | -1.682811 |
| O | 2.142047 | 1.874717  | -1.388189 |
| C | 4.340110 | 1.194319  | -0.985670 |
| H | 5.270678 | 0.859635  | -1.463903 |
| C | 3.119281 | 0.922303  | -1.844566 |
| H | 3.316376 | 1.107600  | -2.914364 |
| H | 2.707584 | -0.086112 | -1.715087 |

35

Figure 5\_L-Cu-Bpin / electronic energy: -2283.43209458 a.u. / lowest freq: 22.76 cm-1

|    |           |           |           |
|----|-----------|-----------|-----------|
| C  | -5.260784 | -0.804958 | -0.048387 |
| C  | -5.293281 | 0.702827  | 0.202688  |
| C  | -3.822883 | -1.154296 | 0.300503  |
| H  | -5.461222 | -1.022839 | -1.109055 |
| H  | -5.982006 | -1.365265 | 0.561542  |
| C  | -3.925652 | 1.140762  | -0.298992 |
| H  | -5.392254 | 0.910763  | 1.279464  |
| H  | -6.110637 | 1.215215  | -0.322449 |
| O  | -3.066752 | 0.016018  | -0.050192 |
| H  | -3.423178 | -2.009824 | -0.261794 |
| H  | -3.693767 | -1.347943 | 1.378172  |
| H  | -3.518349 | 2.015708  | 0.226810  |
| H  | -3.929468 | 1.348028  | -1.381708 |
| H  | 3.918074  | -2.331036 | -1.370471 |
| H  | 3.044653  | -2.685215 | 0.885989  |
| C  | 4.011633  | -1.243679 | -1.229084 |
| H  | 3.785437  | -0.761043 | -2.188880 |
| H  | 5.058224  | -1.025183 | -0.965812 |
| C  | 3.274935  | -1.635891 | 1.123478  |
| O  | 1.710196  | -0.981460 | -0.555812 |
| H  | 4.311859  | -1.585818 | 1.487812  |
| C  | 3.065519  | -0.783276 | -0.129730 |
| H  | 2.602602  | -1.319803 | 1.934937  |
| B  | 0.909509  | 0.040051  | -0.050711 |
| H  | 2.827539  | 1.308033  | -1.930157 |
| C  | 3.096366  | 0.755253  | 0.165928  |
| H  | 4.505090  | 1.493845  | -1.342722 |
| O  | 1.726318  | 1.027058  | 0.493965  |
| C  | 3.445075  | 1.593414  | -1.065373 |
| H  | 5.032596  | 0.892059  | 1.143877  |
| H  | 3.662520  | 0.691999  | 2.272102  |
| C  | 3.982616  | 1.163690  | 1.333844  |
| H  | 3.245725  | 2.652993  | -0.845764 |
| H  | 3.936580  | 2.254328  | 1.473712  |
| Cu | -1.081618 | 0.054302  | -0.065690 |

51

Figure 5\_pc1 / electronic energy: -2592.77992931 a.u. / lowest freq: 19.80 cm-1

|   |           |           |           |
|---|-----------|-----------|-----------|
| C | -2.256774 | 3.463345  | -0.431192 |
| C | -0.964310 | 3.621498  | 0.368889  |
| C | -2.359336 | 1.951731  | -0.555883 |
| H | -2.151603 | 3.925033  | -1.425849 |
| H | -3.136331 | 3.900786  | 0.060559  |
| C | -0.089935 | 2.524336  | -0.218867 |
| H | -1.149978 | 3.432389  | 1.437780  |
| H | -0.505645 | 4.614827  | 0.270123  |
| O | -1.004772 | 1.492393  | -0.625737 |
| H | -2.888892 | 1.615033  | -1.458130 |
| H | -2.849043 | 1.503292  | 0.324836  |
| H | 0.629047  | 2.091111  | 0.488878  |
| H | 0.460418  | 2.871923  | -1.109582 |
| H | -5.676984 | -0.746311 | 2.588672  |
| H | -3.383318 | -1.555224 | 3.137693  |
| C | -4.945900 | -0.909489 | 1.793391  |
| C | -3.662044 | -1.364723 | 2.098281  |
| H | -6.288335 | -0.309451 | 0.209274  |
| C | -5.286130 | -0.664744 | 0.461928  |
| H | 3.806883  | 0.851812  | 2.963475  |
| C | -2.726767 | -1.573405 | 1.086880  |
| H | 3.339323  | 2.426131  | 1.149221  |
| H | -1.721630 | -1.914598 | 1.348521  |
| C | -4.350837 | -0.869699 | -0.549184 |
| C | -3.055314 | -1.328491 | -0.258813 |
| C | 4.148244  | 0.065562  | 2.273197  |
| C | 3.821373  | 1.732685  | 0.443703  |
| H | 3.843114  | -0.902595 | 2.691533  |
| O | 2.129854  | 0.123352  | 0.949122  |
| H | -4.622902 | -0.668400 | -1.589065 |
| H | 4.897060  | 1.962555  | 0.422108  |
| H | 5.248244  | 0.100820  | 2.237239  |
| C | 3.553077  | 0.294290  | 0.891767  |
| C | -2.081819 | -1.500124 | -1.354858 |
| B | 1.675215  | -0.432739 | -0.250510 |
| H | -0.770223 | -2.976838 | -0.455773 |
| C | -0.964611 | -2.314877 | -1.305308 |
| C | 3.963814  | -0.765570 | -0.184787 |
| H | 3.380132  | -2.454174 | 1.070867  |
| O | 2.778964  | -0.848681 | -0.990382 |
| H | 5.146910  | -2.200649 | 0.978994  |
| H | 6.045763  | -0.202919 | -0.452861 |
| C | 4.206571  | -2.154236 | 0.409567  |
| H | -0.430332 | -2.563326 | -2.226796 |
| C | 5.142126  | -0.365884 | -1.060517 |

|    |           |           |           |
|----|-----------|-----------|-----------|
| H  | 4.263842  | -2.887605 | -0.408580 |
| H  | 5.360789  | -1.167524 | -1.782183 |
| Cu | -0.308706 | -0.453469 | -0.786896 |
| H  | -2.387415 | -1.092374 | -2.325327 |
| H  | 3.402583  | 1.921309  | -0.556069 |
| H  | 4.933966  | 0.549522  | -1.630194 |

51

Figure 5\_ts(CuBadd) / electronic energy: -2592.76023309 a.u. / lowest freq: -243.36 cm<sup>-1</sup>

|    |           |           |           |
|----|-----------|-----------|-----------|
| C  | -3.274010 | 3.045404  | 0.166244  |
| C  | -2.040626 | 3.418120  | 0.989909  |
| C  | -2.852817 | 1.722993  | -0.447858 |
| H  | -3.457199 | 3.796108  | -0.618400 |
| H  | -4.186385 | 2.945347  | 0.769088  |
| C  | -0.900267 | 2.974330  | 0.087388  |
| H  | -2.024686 | 2.848931  | 1.932116  |
| H  | -1.982754 | 4.488080  | 1.230706  |
| O  | -1.431755 | 1.860471  | -0.659073 |
| H  | -3.320255 | 1.501649  | -1.416693 |
| H  | -3.029723 | 0.876766  | 0.236361  |
| H  | -0.009072 | 2.634720  | 0.632701  |
| H  | -0.605406 | 3.756413  | -0.630012 |
| H  | -4.677471 | -2.053880 | 2.563563  |
| H  | -2.244858 | -1.677970 | 3.015210  |
| C  | -3.960773 | -1.989858 | 1.741637  |
| C  | -2.602910 | -1.780001 | 1.986088  |
| H  | -5.438382 | -2.299468 | 0.191032  |
| C  | -4.380809 | -2.124196 | 0.410705  |
| H  | 3.073614  | -0.542635 | 3.184159  |
| C  | -1.683329 | -1.696108 | 0.941683  |
| H  | 2.496810  | 1.693014  | 2.329624  |
| H  | -0.630683 | -1.518346 | 1.179820  |
| C  | -3.475928 | -2.038968 | -0.637669 |
| C  | -2.089739 | -1.805165 | -0.418609 |
| C  | 3.592133  | -0.829062 | 2.257111  |
| C  | 3.164306  | 1.506960  | 1.475318  |
| H  | 3.405780  | -1.896593 | 2.082082  |
| O  | 1.711723  | -0.284882 | 0.848383  |
| H  | -3.834811 | -2.139509 | -1.666815 |
| H  | 4.182561  | 1.805460  | 1.764393  |
| H  | 4.671445  | -0.680754 | 2.413140  |
| C  | 3.094098  | 0.026094  | 1.103154  |
| C  | -1.178530 | -1.628587 | -1.522195 |
| B  | 1.490323  | -0.180556 | -0.511399 |
| H  | 0.697845  | -2.170276 | -0.515632 |
| C  | 0.285688  | -1.555114 | -1.333531 |
| C  | 3.758001  | -0.288004 | -0.283097 |
| H  | 3.302515  | -2.423883 | -0.163683 |
| O  | 2.672694  | -0.032332 | -1.200036 |
| H  | 5.008609  | -2.024968 | 0.170871  |
| H  | 5.738004  | 0.501314  | 0.107704  |
| C  | 4.134920  | -1.760064 | -0.442124 |
| H  | 0.856298  | -1.719718 | -2.255331 |
| C  | 4.938805  | 0.597797  | -0.642850 |
| H  | 4.382334  | -1.953380 | -1.496296 |
| H  | 5.350222  | 0.294050  | -1.616858 |
| Cu | -0.410252 | 0.267390  | -1.129870 |
| H  | -1.556408 | -1.818636 | -2.530618 |
| H  | 2.837081  | 2.146469  | 0.641887  |
| H  | 4.650096  | 1.654684  | -0.712889 |

51

Figure 5\_L-Cu-alkyl\_01 / electronic energy: -2592.82066847 a.u. / lowest freq: 22.24 cm<sup>-1</sup>

|   |           |           |           |
|---|-----------|-----------|-----------|
| C | -2.086400 | 4.567242  | 0.310620  |
| C | -0.710788 | 4.578244  | 0.977216  |
| C | -2.386083 | 3.080683  | 0.226005  |
| H | -2.029335 | 5.004660  | -0.698252 |
| H | -2.851141 | 5.111855  | 0.880344  |
| C | -0.030041 | 3.374599  | 0.341804  |
| H | -0.810543 | 4.432148  | 2.063754  |
| H | -0.151555 | 5.507389  | 0.804409  |
| O | -1.099935 | 2.461592  | 0.044109  |
| H | -3.028278 | 2.801796  | -0.621167 |
| H | -2.835733 | 2.692867  | 1.154802  |
| H | 0.681788  | 2.872597  | 1.011943  |
| H | 0.482957  | 3.632441  | -0.598489 |
| H | -4.135789 | -3.813998 | 2.045288  |
| H | -1.654787 | -4.103883 | 2.059166  |
| C | -3.509681 | -3.279270 | 1.326940  |
| C | -2.124760 | -3.437725 | 1.329359  |
| H | -5.165587 | -2.285867 | 0.349438  |
| C | -4.080640 | -2.423249 | 0.378696  |
| H | 3.063619  | -2.153180 | 2.587720  |
| C | -1.320355 | -2.758757 | 0.411312  |
| H | 1.119330  | -0.673749 | 2.457172  |
| H | -0.237739 | -2.888715 | 0.457819  |
| C | -3.280681 | -1.745765 | -0.533847 |
| C | -1.872486 | -1.884047 | -0.547794 |
| C | 3.600155  | -1.625550 | 1.785117  |
| C | 1.688214  | -0.014029 | 1.785780  |
| H | 4.161300  | -2.371206 | 1.206747  |
| O | 1.777160  | -1.799085 | 0.211694  |
| H | -3.748891 | -1.077373 | -1.264287 |
| H | 2.248416  | 0.706151  | 2.399193  |
| H | 4.316023  | -0.933152 | 2.253737  |
| C | 2.612727  | -0.865305 | 0.915582  |
| C | -1.057791 | -1.114487 | -1.529748 |
| B | 1.462136  | -1.245745 | -1.006853 |
| H | 0.248606  | -2.842498 | -1.971171 |

|    |           |           |           |
|----|-----------|-----------|-----------|
| C  | 0.303189  | -1.735723 | -1.939986 |
| C  | 3.261558  | -0.057103 | -0.266362 |
| H  | 4.381112  | -1.777189 | -1.014845 |
| O  | 2.259986  | -0.163658 | -1.291773 |
| H  | 5.372330  | -0.603854 | -0.103625 |
| H  | 4.188373  | 1.526095  | 0.894144  |
| C  | 4.533719  | -0.707681 | -0.807267 |
| H  | 0.538008  | -1.406460 | -2.965725 |
| C  | 3.512085  | 1.411761  | 0.033590  |
| H  | 4.812878  | -0.215491 | -1.750429 |
| H  | 3.982689  | 1.895972  | -0.835022 |
| Cu | -0.962947 | 0.673168  | -0.746352 |
| H  | -1.675969 | -0.980232 | -2.435433 |
| H  | 0.958235  | 0.534608  | 1.169686  |
| H  | 2.575117  | 1.941306  | 0.247211  |

51

Figure 5\_L-Cu-alkyl\_02 / electronic energy: -2592.81753394 a.u. / lowest freq: 23.37 cm<sup>-1</sup>

|    |           |           |           |
|----|-----------|-----------|-----------|
| C  | 6.449872  | 0.193421  | 0.318570  |
| C  | 6.318965  | -1.295661 | 0.640087  |
| C  | 4.999307  | 0.649659  | 0.311017  |
| H  | 6.903289  | 0.334212  | -0.674896 |
| H  | 7.051821  | 0.746214  | 1.052083  |
| C  | 5.072005  | -1.683517 | -0.138505 |
| H  | 6.157325  | -1.444298 | 1.719036  |
| H  | 7.195271  | -1.885326 | 0.338925  |
| O  | 4.256756  | -0.499727 | -0.132541 |
| H  | 4.795739  | 1.480985  | -0.378391 |
| H  | 4.647454  | 0.928711  | 1.317603  |
| H  | 4.500707  | -2.504098 | 0.317377  |
| H  | 5.300736  | -1.946690 | -1.184340 |
| B  | -1.947471 | -1.189567 | 0.048124  |
| O  | -2.756359 | -1.202361 | 1.155649  |
| O  | -2.639331 | -0.856333 | -1.089321 |
| C  | -4.115885 | -1.010812 | 0.725185  |
| C  | -3.927061 | -0.355084 | -0.694141 |
| C  | -4.838939 | -0.136320 | 1.737309  |
| C  | -4.767190 | -2.391372 | 0.663782  |
| C  | -3.817670 | 1.168690  | -0.641705 |
| C  | -4.964035 | -0.768510 | -1.726369 |
| H  | -3.073322 | 1.494762  | 0.099431  |
| H  | -4.783588 | 1.637140  | -0.403014 |
| H  | -3.491328 | 1.536548  | -1.625481 |
| H  | -4.951072 | -1.851408 | -1.906917 |
| H  | -4.759284 | -0.263866 | -2.682338 |
| H  | -5.974542 | -0.478963 | -1.400034 |
| H  | -4.266851 | -3.039112 | -0.071329 |
| H  | -5.833774 | -2.326303 | 0.404560  |
| H  | -4.682211 | -2.872112 | 1.649636  |
| H  | -5.854647 | 0.103310  | 1.387433  |
| H  | -4.300150 | 0.802243  | 1.921725  |
| H  | -4.927623 | -0.669815 | 2.695590  |
| C  | -0.034756 | 2.095508  | -1.154509 |
| C  | -0.410591 | 3.382903  | -0.784162 |
| C  | 0.003439  | 1.031396  | -0.227348 |
| C  | -0.768112 | 3.667217  | 0.537445  |
| C  | -0.359420 | 1.343532  | 1.100052  |
| C  | -0.736662 | 2.633589  | 1.473667  |
| C  | 0.395414  | -0.344508 | -0.647878 |
| C  | -0.398529 | -1.468602 | 0.065483  |
| H  | -1.012453 | 2.830879  | 2.513726  |
| H  | -0.350402 | 0.557480  | 1.858944  |
| H  | -1.067360 | 4.676839  | 0.829119  |
| H  | -0.434385 | 4.174508  | -1.538624 |
| H  | 0.229124  | 1.892831  | -2.197565 |
| Cu | 2.320687  | -0.458151 | -0.414786 |
| H  | -0.067783 | -1.629751 | 1.105619  |
| H  | -0.199531 | -2.427191 | -0.446589 |
| H  | 0.196842  | -0.425313 | -1.731281 |

51

Figure 5\_L-Cu-alkyl\_03 / electronic energy: -2592.82107598 a.u. / lowest freq: 22.07 cm<sup>-1</sup>

|   |           |           |           |
|---|-----------|-----------|-----------|
| B | -1.498250 | -1.589961 | -0.373127 |
| O | -2.215679 | -0.836160 | -1.270258 |
| O | -2.157618 | -1.730740 | 0.821537  |
| C | -3.296782 | -0.211465 | -0.556690 |
| C | -3.470892 | -1.164253 | 0.684724  |
| C | -4.512035 | -0.119960 | -1.465375 |
| C | -2.820312 | 1.189088  | -0.174712 |
| C | -4.437817 | -2.317118 | 0.421626  |
| C | -3.843659 | -0.455235 | 1.977522  |
| H | -4.196945 | -2.839922 | -0.515999 |
| H | -5.479575 | -1.968900 | 0.368551  |
| H | -4.361120 | -3.045494 | 1.242362  |
| H | -3.075827 | 0.269197  | 2.279146  |
| H | -3.950460 | -1.191461 | 2.788014  |
| H | -4.803590 | 0.071988  | 1.869464  |
| H | -1.931433 | 1.143129  | 0.474053  |
| H | -3.603280 | 1.764514  | 0.339759  |
| H | -2.541345 | 1.728604  | -1.091343 |
| H | -5.380795 | 0.272714  | -0.915752 |
| H | -4.777882 | -1.096964 | -1.889305 |
| H | -4.301617 | 0.564954  | -2.300357 |
| C | 3.291182  | -1.480709 | 1.134380  |
| C | 4.649643  | -1.737304 | 0.996299  |
| C | 2.367023  | -1.742361 | 0.095433  |
| C | 5.155071  | -2.272383 | -0.194241 |
| C | 2.897604  | -2.298540 | -1.085447 |
| C | 4.264202  | -2.550806 | -1.228698 |

|    |           |           |           |
|----|-----------|-----------|-----------|
| C  | 0.923405  | -1.418039 | 0.275227  |
| C  | -0.064266 | -2.153382 | -0.650712 |
| H  | 4.634214  | -2.978849 | -2.165035 |
| H  | 2.229405  | -2.537401 | -1.915958 |
| H  | 6.223349  | -2.471418 | -0.307859 |
| H  | 5.327213  | -1.517898 | 1.826592  |
| H  | 2.917477  | -1.052179 | 2.070441  |
| Cu | 0.762839  | 0.525407  | 0.166891  |
| H  | -0.020868 | -3.253209 | -0.507750 |
| H  | 0.166981  | -1.967479 | -1.712675 |
| H  | 0.654233  | -1.635842 | 1.325438  |
| H  | -0.141567 | 2.783176  | -1.691571 |
| H  | 1.611632  | 4.451738  | -1.684511 |
| C  | 0.014282  | 3.327288  | -0.749852 |
| C  | 0.854649  | 4.585298  | -0.896031 |
| H  | 2.785780  | 2.899705  | 0.366269  |
| H  | 0.244923  | 5.463281  | -1.148494 |
| O  | 0.765703  | 2.489674  | 0.145898  |
| H  | -0.965641 | 3.538078  | -0.292273 |
| C  | 1.822003  | 3.226865  | 0.789225  |
| C  | 1.523735  | 4.684022  | 0.474833  |
| H  | 2.433157  | 5.299627  | 0.473997  |
| H  | 1.806985  | 2.989797  | 1.862379  |
| H  | 0.824058  | 5.101281  | 1.215752  |

51

Figure 5\_ts(BHE) / electronic energy: -2592.76459029 a.u. / lowest freq: -958.21 cm-1

|    |           |           |           |
|----|-----------|-----------|-----------|
| B  | -2.077416 | -0.379925 | -0.354524 |
| O  | -3.123566 | -0.568053 | -1.212795 |
| O  | -2.464956 | 0.130751  | 0.853344  |
| C  | -4.282788 | 0.060622  | -0.627881 |
| C  | -3.905255 | 0.094828  | 0.899664  |
| C  | -5.516793 | -0.761969 | -0.959838 |
| C  | -4.393319 | 1.452745  | -1.246411 |
| C  | -4.295090 | -1.181317 | 1.642529  |
| C  | -4.410421 | 1.315605  | 1.651075  |
| H  | -3.947491 | -2.079446 | 1.110555  |
| H  | -5.383475 | -1.255305 | 1.778903  |
| H  | -3.823721 | -1.173674 | 2.636076  |
| H  | -4.002356 | 2.246050  | 1.235131  |
| H  | -4.109016 | 1.253879  | 2.707287  |
| H  | -5.509149 | 1.365868  | 1.614329  |
| H  | -3.507890 | 2.065492  | -1.018740 |
| H  | -5.287825 | 1.983460  | -0.890602 |
| H  | -4.464456 | 1.353645  | -2.339477 |
| H  | -6.402090 | -0.355461 | -0.448129 |
| H  | -5.395562 | -1.814031 | -0.670624 |
| H  | -5.705441 | -0.728266 | -2.043007 |
| C  | 2.266054  | -2.444108 | 1.180248  |
| C  | 3.498499  | -3.055113 | 0.991103  |
| C  | 1.552025  | -1.846090 | 0.107775  |
| C  | 4.088452  | -3.110235 | -0.277928 |
| C  | 2.165586  | -1.922826 | -1.171142 |
| C  | 3.403365  | -2.537456 | -1.351095 |
| C  | 0.293809  | -1.170876 | 0.345262  |
| C  | -0.594319 | -0.713384 | -0.720023 |
| H  | 3.840997  | -2.568392 | -2.353405 |
| H  | 1.667691  | -1.476894 | -2.036713 |
| H  | 5.057784  | -3.592097 | -0.424362 |
| H  | 4.010553  | -3.500927 | 1.849118  |
| H  | 1.828877  | -2.410822 | 2.182936  |
| Cu | 0.722468  | 0.764553  | -0.298971 |
| H  | -0.495236 | -1.215975 | -1.691723 |
| H  | -0.423190 | 0.670195  | -1.419134 |
| H  | -0.093126 | -1.174174 | 1.368654  |
| H  | 2.423927  | 2.892235  | -1.605990 |
| H  | 4.705549  | 2.235747  | -1.174680 |
| C  | 2.768919  | 2.983738  | -0.567197 |
| C  | 4.278122  | 2.901337  | -0.408722 |
| H  | 3.593661  | 0.307025  | 0.519494  |
| H  | 4.758604  | 3.884797  | -0.498589 |
| O  | 2.259357  | 1.864349  | 0.183524  |
| H  | 2.353569  | 3.907748  | -0.133654 |
| C  | 3.295510  | 1.260208  | 0.986503  |
| C  | 4.425243  | 2.274837  | 0.978358  |
| H  | 5.403172  | 1.801893  | 1.139175  |
| H  | 2.876227  | 1.053268  | 1.980501  |
| H  | 4.272645  | 3.032125  | 1.763185  |

51

Figure 5\_pc2 / electronic energy: -2592.80440429 a.u. / lowest freq: -3.31 cm-1

|   |           |           |           |
|---|-----------|-----------|-----------|
| B | -1.960789 | -0.666730 | -0.256467 |
| O | -3.026608 | -0.819707 | -1.097813 |
| O | -2.301034 | -0.087692 | 0.936967  |
| C | -4.125880 | -0.071859 | -0.538573 |
| C | -3.738184 | -0.003791 | 0.986037  |
| C | -5.424885 | -0.804074 | -0.829999 |
| C | -4.122282 | 1.295784  | -1.218007 |
| C | -4.227480 | -1.210763 | 1.784292  |
| C | -4.137623 | 1.285464  | 1.684499  |
| H | -3.961049 | -2.156488 | 1.289301  |
| H | -5.317172 | -1.186399 | 1.929118  |
| H | -3.749333 | -1.200025 | 2.774686  |
| H | -3.657031 | 2.159970  | 1.226987  |
| H | -3.835820 | 1.245182  | 2.741714  |
| H | -5.228685 | 1.424474  | 1.648245  |
| H | -3.183285 | 1.836446  | -1.027181 |
| H | -4.964831 | 1.917778  | -0.883244 |
| H | -4.210779 | 1.153676  | -2.304999 |



|    |           |           |           |
|----|-----------|-----------|-----------|
| H  | -6.270976 | -0.302734 | -0.336198 |
| H  | -5.389590 | -1.847947 | -0.491472 |
| H  | -5.615846 | -0.804869 | -1.913297 |
| C  | 2.583005  | -2.119498 | 1.272440  |
| C  | 3.850635  | -2.682162 | 1.141216  |
| C  | 1.840403  | -1.740497 | 0.143643  |
| C  | 4.405954  | -2.870496 | -0.124891 |
| C  | 2.410552  | -1.936247 | -1.125105 |
| C  | 3.679580  | -2.494533 | -1.256640 |
| C  | 0.510176  | -1.121502 | 0.325512  |
| C  | -0.518771 | -1.131565 | -0.604707 |
| H  | 4.108912  | -2.632270 | -2.251978 |
| H  | 1.862624  | -1.632149 | -2.020633 |
| H  | 5.401330  | -3.308168 | -0.230881 |
| H  | 4.409839  | -2.972805 | 2.033959  |
| H  | 2.155236  | -1.968089 | 2.267301  |
| Cu | 0.413747  | 0.678868  | -0.756709 |
| H  | -0.361437 | -1.636152 | -1.565842 |
| H  | -0.251780 | 1.602415  | -1.870120 |
| H  | 0.272386  | -0.830401 | 1.356796  |
| H  | 2.287397  | 2.931346  | -1.679662 |
| H  | 4.516154  | 2.885251  | -0.758308 |
| C  | 2.359273  | 2.996969  | -0.585446 |
| C  | 3.759714  | 3.306284  | -0.077680 |
| H  | 3.660505  | 0.536702  | 0.489568  |
| H  | 3.939336  | 4.386316  | 0.009409  |
| O  | 2.031549  | 1.714024  | -0.026419 |
| H  | 1.617762  | 3.731784  | -0.231484 |
| C  | 3.010692  | 1.307290  | 0.937304  |
| C  | 3.784433  | 2.573900  | 1.263168  |
| H  | 4.798051  | 2.360108  | 1.628423  |
| H  | 2.490791  | 0.869359  | 1.800421  |
| H  | 3.255466  | 3.158909  | 2.031992  |

72

Figure 5\_pc3 / electronic energy: -3431.66328451 a.u. / lowest freq: 14.43 cm-1

|    |           |           |           |
|----|-----------|-----------|-----------|
| C  | 1.010408  | -1.143332 | -0.590910 |
| C  | 1.263723  | -0.932946 | 0.753021  |
| C  | 2.339120  | 0.005257  | 1.224145  |
| O  | 3.630457  | -0.636774 | 1.283409  |
| P  | 4.446061  | -0.892539 | -0.069041 |
| O  | 4.256453  | 0.083785  | -1.161983 |
| O  | 5.910541  | -1.007292 | 0.570115  |
| O  | 4.083142  | -2.377481 | -0.557906 |
| C  | 7.018324  | -1.277274 | -0.284121 |
| H  | 0.451738  | -2.021463 | -0.929205 |
| H  | 1.594996  | -0.624049 | -1.358184 |
| H  | 0.886351  | -1.649188 | 1.492322  |
| H  | 2.414123  | 0.888098  | 0.569856  |
| H  | 2.146537  | 0.345955  | 2.248578  |
| B  | -3.333918 | -0.481167 | -0.853760 |
| O  | -3.776878 | -0.811543 | 0.408715  |
| O  | -3.183692 | -1.589659 | -1.645283 |
| C  | -3.618829 | -2.232543 | 0.566885  |
| C  | -3.673320 | -2.733457 | -0.923223 |
| C  | -4.720646 | -2.768025 | 1.465107  |
| C  | -2.251766 | -2.449272 | 1.214132  |
| C  | -5.095886 | -3.001936 | -1.410122 |
| C  | -2.780807 | -3.927203 | -1.224402 |
| H  | -5.763263 | -2.155663 | -1.188883 |
| H  | -5.517431 | -3.908512 | -0.952351 |
| H  | -5.079318 | -3.144443 | -2.500664 |
| H  | -1.723328 | -3.701391 | -1.033331 |
| H  | -2.880462 | -4.207914 | -2.283332 |
| H  | -3.070719 | -4.795571 | -0.613428 |
| H  | -1.451222 | -2.061708 | 0.565712  |
| H  | -2.055538 | -3.511394 | 1.418863  |
| H  | -2.210336 | -1.901234 | 2.167388  |
| H  | -4.665193 | -3.864893 | 1.534037  |
| H  | -5.717181 | -2.489398 | 1.098450  |
| H  | -4.605964 | -2.357918 | 2.479579  |
| C  | 0.572241  | 2.457739  | -1.972140 |
| C  | 1.234884  | 3.678304  | -1.985346 |
| C  | -0.782037 | 2.338646  | -1.567770 |
| C  | 0.573180  | 4.853992  | -1.609147 |
| C  | -1.437181 | 3.544757  | -1.239964 |
| C  | -0.770847 | 4.772372  | -1.250364 |
| C  | -1.411937 | 1.003045  | -1.438937 |
| C  | -2.939829 | 0.972990  | -1.269875 |
| H  | -1.318042 | 5.679652  | -0.977160 |
| H  | -2.492997 | 3.525021  | -0.962431 |
| H  | 1.094880  | 5.813895  | -1.612003 |
| H  | 2.284795  | 3.715197  | -2.290160 |
| H  | 1.117132  | 1.552758  | -2.259013 |
| Cu | -0.329400 | 0.209213  | 0.090635  |
| H  | -3.474264 | 1.317732  | -2.179051 |
| H  | -3.257098 | 1.642232  | -0.452802 |
| H  | -1.119678 | 0.376533  | -2.298549 |
| H  | 7.915961  | -1.294685 | 0.346179  |
| H  | 7.125636  | -0.491751 | -1.047399 |
| H  | 6.908177  | -2.253606 | -0.782046 |
| C  | 4.054495  | -3.473897 | 0.345087  |
| H  | 3.901834  | -4.381997 | -0.251310 |
| H  | 3.227994  | -3.370647 | 1.064737  |
| H  | 5.002806  | -3.562818 | 0.897939  |
| H  | -1.971063 | 1.044062  | 3.417643  |
| H  | -0.828862 | 3.603090  | 3.684226  |
| H  | -3.138933 | 3.158320  | 3.050836  |

|   |           |          |          |
|---|-----------|----------|----------|
| C | -2.004209 | 1.413845 | 2.377317 |
| H | 0.906218  | 2.473615 | 2.511381 |
| C | -1.013412 | 3.552308 | 2.600186 |
| O | -0.687974 | 1.341524 | 1.815774 |
| C | -2.362867 | 2.887231 | 2.322242 |
| H | -2.665133 | 0.761111 | 1.790627 |
| C | -0.017144 | 2.608364 | 1.928172 |
| H | -0.942518 | 4.570685 | 2.194113 |
| H | -2.722585 | 3.147810 | 1.315939 |
| H | 0.252891  | 2.946939 | 0.916357 |

72

Figure 5\_ts(AS)\_01 / electronic energy: -3431.62747806 a.u. / lowest freq: -242.03 cm-1

|    |           |           |           |
|----|-----------|-----------|-----------|
| C  | 0.541084  | -1.330169 | -0.220517 |
| C  | 0.818266  | -1.254836 | 1.185889  |
| C  | 1.724124  | -0.325065 | 1.684133  |
| O  | 3.697270  | -1.092990 | 1.648406  |
| P  | 4.231484  | -1.060583 | 0.221125  |
| O  | 3.562569  | -0.228468 | -0.830974 |
| O  | 5.810459  | -0.670492 | 0.382995  |
| O  | 4.310949  | -2.590518 | -0.355469 |
| C  | 6.611918  | -0.584709 | -0.773310 |
| H  | -0.135396 | -2.102533 | -0.596644 |
| H  | 1.331601  | -1.010120 | -0.908009 |
| H  | 0.322240  | -1.938996 | 1.881165  |
| H  | 2.112517  | 0.459746  | 1.033761  |
| H  | 1.818760  | -0.171755 | 2.758837  |
| B  | -3.032939 | -0.580232 | -1.187052 |
| O  | -3.960129 | -0.588495 | -0.174376 |
| O  | -2.644412 | -1.840998 | -1.546772 |
| C  | -3.981496 | -1.917754 | 0.381628  |
| C  | -3.452535 | -2.786767 | -0.819654 |
| C  | -5.390939 | -2.253734 | 0.837389  |
| C  | -3.026094 | -1.894389 | 1.573498  |
| C  | -4.561872 | -3.248432 | -1.761694 |
| C  | -2.587787 | -3.968252 | -0.410551 |
| H  | -5.208190 | -2.411721 | -2.066123 |
| H  | -5.188893 | -4.023701 | -1.298786 |
| H  | -4.106962 | -3.671746 | -2.669162 |
| H  | -1.703337 | -3.652243 | 0.158132  |
| H  | -2.241218 | -4.503526 | -1.306713 |
| H  | -3.164967 | -4.673208 | 0.206432  |
| H  | -2.016243 | -1.585568 | 1.258499  |
| H  | -2.956654 | -2.871445 | 2.071772  |
| H  | -3.385429 | -1.159525 | 2.308751  |
| H  | -5.444974 | -3.294036 | 1.191934  |
| H  | -6.123566 | -2.120201 | 0.030870  |
| H  | -5.680179 | -1.596356 | 1.670559  |
| C  | 1.234268  | 2.072605  | -1.565761 |
| C  | 1.932508  | 3.275481  | -1.526580 |
| C  | -0.178813 | 2.044641  | -1.606196 |
| C  | 1.251751  | 4.496235  | -1.534332 |
| C  | -0.843660 | 3.284242  | -1.636063 |
| C  | -0.140614 | 4.489337  | -1.598753 |
| C  | -0.900646 | 0.739064  | -1.546364 |
| C  | -2.414705 | 0.744233  | -1.754653 |
| H  | -0.691689 | 5.433451  | -1.621464 |
| H  | -1.933023 | 3.315253  | -1.693769 |
| H  | 1.801107  | 5.439881  | -1.496885 |
| H  | 3.024632  | 3.254608  | -1.480633 |
| H  | 1.807278  | 1.139977  | -1.526605 |
| Cu | -0.406670 | 0.264857  | 0.339037  |
| H  | -2.659076 | 0.884070  | -2.825753 |
| H  | -2.890491 | 1.580329  | -1.218761 |
| H  | -0.425147 | 0.008884  | -2.212220 |
| H  | 7.614809  | -0.255036 | -0.465853 |
| H  | 6.204751  | 0.142308  | -1.495478 |
| H  | 6.704509  | -1.561326 | -1.279474 |
| C  | 4.824617  | -3.607767 | 0.473681  |
| H  | 4.728343  | -4.563104 | -0.062068 |
| H  | 4.268865  | -3.672068 | 1.423323  |
| H  | 5.891111  | -3.443209 | 0.706668  |
| H  | -2.735224 | 1.640026  | 2.846228  |
| H  | -1.407095 | 4.057291  | 3.309304  |
| H  | -3.520520 | 3.846576  | 2.127268  |
| C  | -2.494379 | 1.943682  | 1.812671  |
| H  | 0.382943  | 2.626855  | 2.676616  |
| C  | -1.317860 | 3.957505  | 2.217107  |
| O  | -1.101648 | 1.692604  | 1.570257  |
| C  | -2.632094 | 3.441623  | 1.624434  |
| H  | -3.082774 | 1.329000  | 1.118689  |
| C  | -0.312171 | 2.864112  | 1.857213  |
| H  | -1.017367 | 4.932079  | 1.809881  |
| H  | -2.698139 | 3.681263  | 0.552690  |
| H  | 0.271266  | 3.108404  | 0.957509  |

72

Figure 5\_ts(AS)\_02 / electronic energy: -3431.62868825 a.u. / lowest freq: -257.55 cm-1

|   |           |           |           |
|---|-----------|-----------|-----------|
| C | -0.323165 | -1.633665 | -1.016951 |
| C | 0.073933  | -2.343584 | 0.155606  |
| C | 1.034564  | -1.854972 | 1.031573  |
| O | 2.929969  | -2.677866 | 0.538975  |
| P | 3.695617  | -1.659967 | -0.297182 |
| O | 3.073067  | -0.983633 | -1.475690 |
| O | 4.204054  | -0.543159 | 0.800836  |
| O | 5.101219  | -2.334440 | -0.780391 |
| C | 4.971240  | 0.550085  | 0.355742  |
| H | -1.010172 | -2.114330 | -1.717884 |
| H | 0.371456  | -0.899258 | -1.447074 |

|    |           |           |           |
|----|-----------|-----------|-----------|
| H  | -0.416829 | -3.292032 | 0.395510  |
| H  | 1.457231  | -0.859324 | 0.901008  |
| H  | 1.156967  | -2.307864 | 2.014111  |
| B  | -1.040652 | 1.803776  | -1.668028 |
| O  | 0.267763  | 1.665823  | -2.036000 |
| O  | -1.235185 | 2.877292  | -0.832841 |
| C  | 1.050877  | 2.544555  | -1.202745 |
| C  | -0.005423 | 3.633778  | -0.800985 |
| C  | 2.242087  | 3.048961  | -1.997504 |
| C  | 1.525063  | 1.712653  | -0.014341 |
| C  | -0.136534 | 4.750070  | -1.834035 |
| C  | 0.188147  | 4.221509  | 0.586562  |
| H  | -0.258988 | 4.345250  | -2.849763 |
| H  | 0.741331  | 5.412201  | -1.826002 |
| H  | -1.025032 | 5.354858  | -1.600010 |
| H  | 0.155151  | 3.449858  | 1.366091  |
| H  | -0.604161 | 4.954706  | 0.798649  |
| H  | 1.157025  | 4.738938  | 0.652479  |
| H  | 0.669245  | 1.372318  | 0.591989  |
| H  | 2.202170  | 2.282424  | 0.638276  |
| H  | 2.060568  | 0.833645  | -0.402471 |
| H  | 2.830974  | 3.764921  | -1.404496 |
| H  | 1.933787  | 3.535104  | -2.932446 |
| H  | 2.890280  | 2.198301  | -2.254252 |
| C  | -4.317591 | -1.470735 | 0.220127  |
| C  | -5.206164 | -2.539278 | 0.159499  |
| C  | -3.581809 | -1.056336 | -0.910703 |
| C  | -5.395106 | -3.232528 | -1.039381 |
| C  | -3.791371 | -1.762500 | -2.108735 |
| C  | -4.682694 | -2.834800 | -2.169698 |
| C  | -2.612886 | 0.065603  | -0.787714 |
| C  | -2.164787 | 0.783210  | -2.057912 |
| H  | -4.824684 | -3.360627 | -3.117585 |
| H  | -3.254017 | -1.468238 | -3.012914 |
| H  | -6.095554 | -4.069327 | -1.090528 |
| H  | -5.762033 | -2.831724 | 1.054360  |
| H  | -4.181207 | -0.936510 | 1.166063  |
| Cu | -1.176706 | -0.644045 | 0.421359  |
| H  | -3.022558 | 1.288759  | -2.542317 |
| H  | -1.752370 | 0.078351  | -2.796430 |
| H  | -3.010360 | 0.799919  | -0.067909 |
| H  | 5.041774  | 1.277283  | 1.178063  |
| H  | 4.511763  | 1.043348  | -0.516813 |
| H  | 5.993817  | 0.240416  | 0.076279  |
| C  | 5.861018  | -3.083193 | 0.141309  |
| H  | 6.787600  | -3.395275 | -0.361452 |
| H  | 5.317997  | -3.981304 | 0.477942  |
| H  | 6.128427  | -2.486691 | 1.030952  |
| H  | 0.367684  | 0.030462  | 3.240637  |
| H  | -0.567766 | 2.670075  | 3.425821  |
| H  | -0.534362 | 1.029546  | 5.256564  |
| C  | -0.717169 | -0.088955 | 3.393099  |
| H  | -1.835487 | 2.163722  | 1.423726  |
| C  | -1.510714 | 2.131667  | 3.610320  |
| O  | -1.392201 | 0.282848  | 2.174013  |
| C  | -1.250839 | 0.874120  | 4.439129  |
| H  | -0.937249 | -1.144929 | 3.601228  |
| C  | -2.055591 | 1.558708  | 2.314153  |
| H  | -2.217938 | 2.827930  | 4.080157  |
| H  | -2.189657 | 0.492351  | 4.869176  |
| H  | -3.141338 | 1.379525  | 2.370014  |

72

Figure 5\_pi-allyl / electronic energy: -3431.66797676 a.u. / lowest freq: 24.27 cm<sup>-1</sup>

|   |           |           |           |
|---|-----------|-----------|-----------|
| C | -0.083301 | 0.083360  | -2.274188 |
| C | -1.102079 | -0.975871 | -2.340474 |
| C | -0.846681 | -2.293377 | -2.388363 |
| O | 1.698408  | -1.408121 | -0.457922 |
| P | 3.083634  | -1.149194 | -1.062056 |
| O | 3.235243  | -0.579295 | -2.430007 |
| O | 3.822358  | -0.218808 | 0.066165  |
| O | 3.913407  | -2.544187 | -0.984039 |
| C | 5.052448  | 0.402731  | -0.242338 |
| H | -0.410995 | 1.028277  | -2.712242 |
| H | 0.920706  | -0.200847 | -2.620546 |
| H | -2.141691 | -0.632990 | -2.319019 |
| H | 0.180825  | -2.669817 | -2.375260 |
| H | -1.656668 | -3.027101 | -2.435922 |
| B | -2.880348 | 0.960051  | 0.359457  |
| O | -3.569767 | 0.181028  | 1.248511  |
| O | -3.450777 | 0.966609  | -0.883414 |
| C | -4.575043 | -0.549282 | 0.514811  |
| C | -4.745418 | 0.336432  | -0.774996 |
| C | -5.823816 | -0.672833 | 1.371633  |
| C | -3.997470 | -1.932017 | 0.221546  |
| C | -5.768856 | 1.456457  | -0.596910 |
| C | -5.039338 | -0.441969 | -2.046262 |
| H | -5.583391 | 2.028430  | 0.324618  |
| H | -6.795053 | 1.064004  | -0.561290 |
| H | -5.695476 | 2.150814  | -1.446706 |
| H | -4.259500 | -1.180379 | -2.271796 |
| H | -5.110143 | 0.250742  | -2.897628 |
| H | -6.000506 | -0.969899 | -1.956224 |
| H | -3.085254 | -1.867483 | -0.389752 |
| H | -4.724838 | -2.568770 | -0.302150 |
| H | -3.736489 | -2.423299 | 1.170507  |
| H | -6.639673 | -1.141701 | 0.801383  |
| H | -6.167327 | 0.303412  | 1.737504  |

|    |           |           |           |
|----|-----------|-----------|-----------|
| H  | -5.612537 | -1.307281 | 2.245142  |
| C  | 1.632475  | 2.950667  | -0.973521 |
| C  | 2.855394  | 3.548653  | -0.695892 |
| C  | 0.773535  | 2.531608  | 0.063016  |
| C  | 3.256927  | 3.746885  | 0.628356  |
| C  | 1.190472  | 2.743563  | 1.387564  |
| C  | 2.418434  | 3.343640  | 1.665627  |
| C  | -0.505139 | 1.840187  | -0.277661 |
| C  | -1.607618 | 1.787580  | 0.763983  |
| H  | 2.718964  | 3.497602  | 2.704915  |
| H  | 0.547662  | 2.434565  | 2.213288  |
| H  | 4.219770  | 4.214672  | 0.846541  |
| H  | 3.505032  | 3.859849  | -1.517380 |
| H  | 1.334795  | 2.784802  | -2.012199 |
| Cu | 0.363940  | 0.064422  | -0.362543 |
| H  | -1.960527 | 2.826875  | 0.929199  |
| H  | -1.243296 | 1.429523  | 1.735313  |
| H  | -0.894866 | 2.201200  | -1.231602 |
| H  | 5.283275  | 1.110795  | 0.565483  |
| H  | 4.994564  | 0.948245  | -1.196814 |
| H  | 5.867788  | -0.338135 | -0.308317 |
| C  | 3.885405  | -3.324831 | 0.190611  |
| H  | 4.634118  | -4.122250 | 0.081012  |
| H  | 2.897066  | -3.788314 | 0.342179  |
| H  | 4.142465  | -2.728243 | 1.082000  |
| H  | -0.547311 | -2.156135 | 1.055771  |
| H  | 1.915598  | -2.556493 | 2.281969  |
| H  | -0.267171 | -3.225076 | 3.204434  |
| C  | -0.589263 | -1.482132 | 1.928434  |
| H  | 2.336225  | -0.228898 | 1.832325  |
| C  | 1.471289  | -1.873072 | 3.020540  |
| O  | 0.275478  | -0.357064 | 1.684717  |
| C  | -0.023752 | -2.154366 | 3.168494  |
| H  | -1.615223 | -1.105989 | 2.042905  |
| C  | 1.475298  | -0.455456 | 2.474098  |
| H  | 2.029206  | -1.959283 | 3.963102  |
| H  | -0.420452 | -1.679251 | 4.079621  |
| H  | 1.415067  | 0.292625  | 3.282203  |

98

Figure 8 L3a-Cu-OtBu / electronic energy: -4500.61984018 a.u. / lowest freq: -20.29 cm-1

|   |           |           |           |
|---|-----------|-----------|-----------|
| P | -1.580542 | 0.896725  | 0.507317  |
| C | -2.908207 | 3.157185  | -0.383641 |
| C | -4.006725 | 3.985801  | -0.616704 |
| C | -3.065934 | 1.952882  | 0.310453  |
| C | -5.267815 | 3.615698  | -0.152099 |
| C | -4.334988 | 1.587341  | 0.777167  |
| C | -5.430677 | 2.415956  | 0.544998  |
| C | -2.523549 | -1.468960 | 3.766793  |
| C | -2.433956 | -0.995007 | 2.458931  |
| C | -1.750721 | 0.195213  | 2.185586  |
| C | -1.940215 | -0.754291 | 4.813269  |
| C | -1.270557 | 0.441252  | 4.550950  |
| C | -1.173132 | 0.911691  | 3.242472  |
| C | -2.488216 | -0.166613 | -2.032914 |
| C | -1.872393 | -0.448550 | -0.671022 |
| C | -1.299140 | -1.669779 | -0.734533 |
| C | -1.272709 | 0.069693  | -2.972172 |
| C | -0.635837 | -1.334154 | -3.044849 |
| C | -1.568682 | -2.215154 | -2.148736 |
| C | -1.395589 | -3.700880 | -2.383493 |
| C | -2.968758 | -1.580997 | -2.446504 |
| C | -3.416732 | -1.695439 | -3.906676 |
| C | -4.117793 | -2.103832 | -1.580032 |
| C | -0.402948 | -2.359373 | 0.224528  |
| C | -0.776860 | -3.505808 | 0.883773  |
| C | 0.975407  | -1.984659 | 0.502411  |
| S | 0.536953  | -4.140203 | 1.811096  |
| C | 1.617684  | -2.882805 | 1.327412  |
| C | -2.109087 | -4.184545 | 0.927504  |
| C | 3.027464  | -2.915300 | 1.833201  |
| P | 1.678909  | -0.407382 | -0.087965 |
| C | 3.102106  | 0.859929  | 3.522479  |
| C | 2.302495  | 0.358977  | 2.498979  |
| C | 4.452175  | 1.127830  | 3.286856  |
| C | 2.843742  | 0.105397  | 1.231146  |
| C | 4.993844  | 0.884481  | 2.025620  |
| C | 4.195075  | 0.374971  | 1.000685  |
| C | 3.810868  | 0.068843  | -3.514968 |
| C | 3.023741  | 0.281283  | -2.383591 |
| C | 4.288299  | -1.209367 | -3.809490 |
| C | 2.730665  | -0.792862 | -1.528752 |
| C | 3.979451  | -2.281011 | -2.970507 |
| C | 3.204103  | -2.074442 | -1.829949 |
| H | -1.915778 | 3.440512  | -0.746059 |
| H | -3.873260 | 4.924573  | -1.159108 |
| H | -6.129053 | 4.263617  | -0.331942 |
| H | -4.472168 | 0.649243  | 1.321329  |
| H | -6.418530 | 2.124936  | 0.910059  |
| H | -3.052633 | -2.403325 | 3.968939  |
| H | -2.893523 | -1.557737 | 1.644298  |
| H | -2.009117 | -1.130195 | 5.836777  |
| H | -0.813928 | 1.005846  | 5.367081  |
| H | -0.634680 | 1.841763  | 3.037295  |
| H | -3.246522 | 0.627518  | -2.056758 |
| H | -0.589719 | 0.827995  | -2.558260 |
| H | -1.599587 | 0.429651  | -3.958197 |
| H | 0.397965  | -1.358219 | -2.675070 |

|    |           |           |           |
|----|-----------|-----------|-----------|
| H  | -0.612264 | -1.725800 | -4.072823 |
| H  | -1.570304 | -3.939191 | -3.444195 |
| H  | -2.092416 | -4.304994 | -1.785566 |
| H  | -0.372211 | -4.024525 | -2.136174 |
| H  | -4.283813 | -1.039932 | -4.086553 |
| H  | -3.735264 | -2.726536 | -4.127997 |
| H  | -2.643849 | -1.427048 | -4.637860 |
| H  | -5.049987 | -1.574746 | -1.833824 |
| H  | -3.945257 | -1.962235 | -0.505502 |
| H  | -4.291685 | -3.176350 | -1.763069 |
| H  | -2.830286 | -3.652783 | 0.295310  |
| H  | -2.511139 | -4.201379 | 1.953149  |
| H  | -2.051970 | -5.227314 | 0.578596  |
| H  | 3.133815  | -2.345375 | 2.769850  |
| H  | 3.720647  | -2.481976 | 1.101170  |
| H  | 3.345945  | -3.948938 | 2.031729  |
| H  | 2.665823  | 1.045999  | 4.506885  |
| H  | 1.245355  | 0.156678  | 2.688849  |
| H  | 5.080940  | 1.527152  | 4.086046  |
| H  | 6.049214  | 1.091790  | 1.833772  |
| H  | 4.633959  | 0.190791  | 0.017398  |
| H  | 4.040865  | 0.905396  | -4.179302 |
| H  | 2.611508  | 1.276687  | -2.160485 |
| H  | 4.894279  | -1.374226 | -4.703735 |
| H  | 4.343260  | -3.284201 | -3.205138 |
| H  | 2.955927  | -2.917868 | -1.180520 |
| Cu | 0.417430  | 1.531952  | -0.315265 |
| H  | 1.533422  | 5.234717  | -2.570756 |
| H  | 2.752520  | 5.897866  | -1.444814 |
| H  | 3.117535  | 4.440494  | -2.410028 |
| C  | 2.325100  | 4.966405  | -1.852792 |
| H  | -0.149226 | 5.110504  | -0.667688 |
| C  | 1.752337  | 4.045194  | -0.761300 |
| H  | 1.046191  | 5.717534  | 0.511698  |
| O  | 1.233972  | 2.914790  | -1.363084 |
| C  | 0.662151  | 4.810177  | 0.015323  |
| H  | 3.662168  | 3.098170  | -0.312532 |
| H  | 3.360480  | 4.550221  | 0.683303  |
| C  | 2.883951  | 3.670816  | 0.217078  |
| H  | 0.224040  | 4.154997  | 0.787863  |
| H  | 2.491679  | 3.029307  | 1.024769  |

39

Figure 8\_para-NMe2-styrene-Cu-OtBu / electronic energy: -2316.39314463 a.u. / lowest freq: 15.08 cm<sup>-1</sup>

|    |           |           |           |
|----|-----------|-----------|-----------|
| C  | -0.498289 | -1.681031 | -0.152427 |
| C  | -1.237584 | -1.347445 | -1.296960 |
| C  | -0.972772 | -1.195660 | 1.077755  |
| C  | -2.117048 | -0.420108 | 1.164329  |
| C  | -2.866748 | -0.083896 | 0.006808  |
| C  | -2.387165 | -0.574274 | -1.233136 |
| H  | -0.433126 | -1.421984 | 2.000711  |
| H  | -2.433199 | -0.070901 | 2.146691  |
| H  | -2.914625 | -0.347791 | -2.159106 |
| H  | -0.893051 | -1.698055 | -2.274189 |
| C  | 0.753302  | -2.444880 | -0.295478 |
| C  | 1.630903  | -2.802337 | 0.703754  |
| H  | 0.930584  | -2.850613 | -1.299387 |
| H  | 1.426444  | -2.608632 | 1.761807  |
| H  | 2.439541  | -3.506045 | 0.485823  |
| H  | 4.298713  | 2.871785  | 0.015425  |
| H  | 3.509208  | 2.904737  | -1.577772 |
| C  | 3.326495  | 2.970794  | -0.493313 |
| O  | 2.994493  | 0.630073  | -0.377034 |
| H  | 2.916786  | 3.969814  | -0.270799 |
| C  | 2.389030  | 1.833825  | -0.053365 |
| H  | 3.101309  | 1.791959  | 2.002391  |
| H  | 1.185507  | 1.850956  | -1.864681 |
| C  | 2.150477  | 1.936142  | 1.464495  |
| C  | 1.038819  | 1.982646  | -0.780483 |
| H  | 1.722253  | 2.906564  | 1.767228  |
| H  | 0.565379  | 2.964444  | -0.610641 |
| H  | 1.455039  | 1.143091  | 1.789784  |
| H  | 0.332986  | 1.204281  | -0.442150 |
| Cu | 2.180374  | -0.979899 | -0.070442 |
| H  | -3.715353 | 1.862691  | 1.825944  |
| H  | -5.384116 | 1.738855  | 1.224422  |
| C  | -4.451297 | 1.180414  | 1.364695  |
| H  | -4.655702 | 0.366484  | 2.081475  |
| H  | -4.116738 | 1.611727  | -1.816209 |
| N  | -4.001101 | 0.675892  | 0.086451  |
| H  | -5.608480 | 1.615344  | -0.849938 |
| C  | -4.728955 | 1.017009  | -1.115351 |
| H  | -5.083448 | 0.119332  | -1.650825 |

78

Figure 8\_para-NMe2-styrene-Cu-OtBu\_dimer\_01 / electronic energy: -4632.85611567 a.u. / lowest freq: 17.08 cm<sup>-1</sup>

|   |           |           |           |
|---|-----------|-----------|-----------|
| H | -7.925765 | 0.715391  | -1.021346 |
| C | -8.200771 | -0.269158 | -0.603696 |
| H | -9.148271 | -0.146730 | -0.065705 |
| H | -6.965867 | -0.469431 | 2.390185  |
| N | -7.195446 | -0.774753 | 0.301890  |
| H | -8.382134 | -0.955525 | -1.450269 |
| H | -8.606424 | -0.865389 | 1.833140  |
| C | -7.542999 | -1.077656 | 1.671169  |
| H | -7.373502 | -2.141109 | 1.916337  |
| H | 3.101569  | 2.577516  | 1.852593  |
| H | 5.030045  | 1.194239  | 2.090300  |
| H | 2.311170  | 3.291857  | -1.065131 |
| C | 2.992298  | 2.373069  | 0.780948  |

|    |           |           |           |
|----|-----------|-----------|-----------|
| C  | 2.229779  | 3.250818  | 0.026174  |
| C  | 4.926034  | 0.823930  | 1.066353  |
| H  | 6.548540  | -0.542506 | 1.318698  |
| C  | 3.924139  | 1.356436  | 0.245248  |
| C  | 5.793314  | -0.169291 | 0.627467  |
| H  | 1.777121  | 4.123165  | 0.505654  |
| C  | 3.830945  | 0.840543  | -1.057331 |
| C  | 5.696113  | -0.692791 | -0.682893 |
| H  | 3.051431  | 1.203636  | -1.733016 |
| C  | 4.683176  | -0.153860 | -1.514796 |
| H  | 4.549682  | -0.525307 | -2.530559 |
| H  | -0.600718 | -1.328084 | 3.214859  |
| H  | -0.373603 | -2.505842 | 1.898846  |
| C  | 0.148838  | -1.932304 | 2.679455  |
| O  | 0.560934  | -0.095044 | 1.215512  |
| H  | 0.590356  | -2.649436 | 3.390269  |
| C  | 1.204924  | -1.014539 | 2.048538  |
| H  | 1.232546  | 0.386606  | 3.708373  |
| H  | 1.684192  | -2.398945 | 0.442334  |
| C  | 1.939281  | -0.257266 | 3.160816  |
| C  | 2.207564  | -1.849490 | 1.240958  |
| H  | 2.413798  | -0.942127 | 3.881927  |
| H  | 2.745718  | -2.579814 | 1.867074  |
| H  | 2.724262  | 0.382016  | 2.732081  |
| H  | 2.949082  | -1.189097 | 0.766765  |
| Cu | 1.094136  | 1.651625  | 0.477976  |
| C  | -3.232227 | -1.395466 | -1.059907 |
| C  | -4.233045 | -0.909952 | -1.911227 |
| C  | -3.607986 | -1.678584 | 0.262767  |
| C  | -4.903382 | -1.480066 | 0.716894  |
| C  | -5.914276 | -0.983029 | -0.143449 |
| C  | -5.538581 | -0.709213 | -1.479991 |
| H  | -2.861410 | -2.039600 | 0.975448  |
| H  | -5.125906 | -1.704170 | 1.759744  |
| H  | -6.269239 | -0.331807 | -2.194995 |
| H  | -3.985348 | -0.680286 | -2.951486 |
| C  | -1.845400 | -1.548248 | -1.549366 |
| C  | -0.881445 | -2.350470 | -0.957519 |
| H  | -1.663580 | -1.169046 | -2.561822 |
| H  | -1.123885 | -3.010466 | -0.119141 |
| H  | 0.033467  | -2.591340 | -1.507949 |
| H  | -0.702228 | 3.924383  | 0.608569  |
| H  | -0.421759 | 4.102345  | -1.142508 |
| C  | -1.172374 | 3.831282  | -0.383836 |
| O  | -0.573692 | 1.518935  | -0.600778 |
| H  | -1.997462 | 4.559787  | -0.438256 |
| C  | -1.661657 | 2.395580  | -0.609037 |
| H  | -2.106702 | 1.976081  | 1.470005  |
| H  | -1.661254 | 2.592964  | -2.773445 |
| C  | -2.644788 | 2.017690  | 0.509172  |
| C  | -2.359672 | 2.305439  | -1.971504 |
| H  | -3.475155 | 2.736785  | 0.602597  |
| H  | -3.247554 | 2.956012  | -2.031660 |
| H  | -3.078854 | 1.022843  | 0.321590  |
| H  | -2.682680 | 1.270706  | -2.155200 |
| Cu | -0.635509 | -0.450783 | -0.313313 |
| H  | 5.376993  | -2.732987 | -2.568593 |
| C  | 6.360834  | -2.243199 | -2.446865 |
| H  | 7.135420  | -2.998020 | -2.628039 |
| H  | 7.012046  | -2.753007 | 0.647538  |
| N  | 6.538763  | -1.681583 | -1.127925 |
| H  | 6.454057  | -1.476843 | -3.235361 |
| H  | 8.072833  | -3.039408 | -0.751101 |
| C  | 7.496464  | -2.271252 | -0.221696 |
| H  | 8.213028  | -1.524947 | 0.162718  |

78

Figure 8\_para-NMe2-styrene-Cu-OtBu\_dimer\_02 / electronic energy: -4632.85757242 a.u. / lowest freq: 25.42 cm<sup>-1</sup>

|   |           |           |           |
|---|-----------|-----------|-----------|
| H | -6.462330 | 0.112008  | 1.967236  |
| C | -6.947082 | -0.011280 | 0.982018  |
| H | -7.920423 | -0.488731 | 1.145750  |
| H | -6.071633 | -2.939237 | -0.088349 |
| N | -6.160173 | -0.823652 | 0.084131  |
| H | -7.133561 | 0.996501  | 0.570660  |
| H | -7.696349 | -2.226467 | 0.001442  |
| C | -6.687633 | -2.077355 | -0.401824 |
| H | -6.761252 | -2.098819 | -1.503685 |
| H | 3.188918  | 0.310793  | 3.059058  |
| H | 1.430575  | 1.942259  | 3.080155  |
| H | 4.910621  | -1.055380 | 1.986414  |
| C | 3.393554  | 0.460794  | 1.992983  |
| C | 4.356314  | -0.328617 | 1.384945  |
| C | 1.648060  | 2.235788  | 2.049922  |
| H | 0.032691  | 3.630801  | 2.024705  |
| C | 2.698143  | 1.605521  | 1.368131  |
| C | 0.846682  | 3.193769  | 1.447293  |
| H | 4.807571  | -0.062531 | 0.424618  |
| C | 2.927383  | 2.009672  | 0.043617  |
| C | 1.050419  | 3.568628  | 0.098262  |
| H | 3.734500  | 1.554299  | -0.534569 |
| C | 2.133734  | 2.961024  | -0.581328 |
| H | 2.351262  | 3.220533  | -1.617111 |
| H | 1.338319  | -3.748788 | -2.453139 |
| H | 1.103798  | -2.178380 | -3.258273 |
| C | 1.864153  | -2.887820 | -2.894963 |
| O | 1.937472  | -1.843844 | -0.757848 |
| H | 2.445594  | -3.241466 | -3.761790 |
| C | 2.745875  | -2.215070 | -1.835405 |

|    |           |           |           |
|----|-----------|-----------|-----------|
| H  | 3.315117  | -4.089673 | -0.890726 |
| H  | 2.695647  | -0.253842 | -2.777094 |
| C  | 3.802555  | -3.207188 | -1.334412 |
| C  | 3.442657  | -0.989239 | -2.441179 |
| H  | 4.471599  | -3.548556 | -2.140899 |
| H  | 4.079030  | -1.252189 | -3.301839 |
| H  | 4.419384  | -2.733355 | -0.553142 |
| H  | 4.076985  | -0.504668 | -1.682720 |
| Cu | 2.461619  | -1.008065 | 0.958918  |
| C  | -2.267941 | 0.415777  | -1.031195 |
| C  | -3.064715 | 1.184407  | -0.173657 |
| C  | -2.818342 | -0.784611 | -1.505407 |
| C  | -4.091852 | -1.199584 | -1.143545 |
| C  | -4.899844 | -0.419405 | -0.278836 |
| C  | -4.345022 | 0.792574  | 0.195989  |
| H  | -2.228725 | -1.432984 | -2.159629 |
| H  | -4.459321 | -2.147209 | -1.536747 |
| H  | -4.913660 | 1.434492  | 0.868226  |
| H  | -2.661853 | 2.117561  | 0.230968  |
| C  | -0.899830 | 0.865761  | -1.354920 |
| C  | -0.110320 | 0.411409  | -2.400393 |
| H  | -0.592035 | 1.785792  | -0.844493 |
| H  | -0.483215 | -0.314617 | -3.130669 |
| H  | 0.764871  | 0.992528  | -2.705914 |
| H  | 1.458715  | -2.384436 | 3.166273  |
| H  | 0.609176  | -0.992257 | 3.888075  |
| C  | 0.464276  | -1.940679 | 3.346866  |
| O  | 0.494470  | -0.750855 | 1.283641  |
| H  | -0.100230 | -2.627559 | 3.998238  |
| C  | -0.251878 | -1.679112 | 2.013783  |
| H  | 0.597243  | -3.382467 | 0.959788  |
| H  | -1.558315 | -0.123076 | 2.789105  |
| C  | -0.395345 | -3.001431 | 1.243551  |
| C  | -1.645830 | -1.098322 | 2.284569  |
| H  | -0.924872 | -3.770475 | 1.829847  |
| H  | -2.259197 | -1.764061 | 2.914148  |
| H  | -0.960601 | -2.837725 | 0.310480  |
| H  | -2.178961 | -0.940939 | 1.335543  |
| Cu | 0.428662  | -0.539132 | -0.699699 |
| H  | 1.341665  | 5.146277  | -2.195034 |
| C  | 0.364083  | 4.695768  | -1.951611 |
| H  | -0.413337 | 5.392739  | -2.285949 |
| H  | -0.607129 | 5.572819  | 1.067597  |
| N  | 0.216057  | 4.457122  | -0.534422 |
| H  | 0.261588  | 3.766442  | -2.541499 |
| H  | -1.452510 | 5.703368  | -0.487171 |
| C  | -0.916914 | 5.009190  | 0.171096  |
| H  | -1.632285 | 4.230462  | 0.494367  |

98

Figure 8\_L3a-Cu-OtBu / electronic energy: -4500.61984018 a.u. / lowest freq: -20.29 cm<sup>-1</sup>

|   |           |           |           |
|---|-----------|-----------|-----------|
| P | -1.580542 | 0.896725  | 0.507317  |
| C | -2.908207 | 3.157185  | -0.383641 |
| C | -4.006725 | 3.985801  | -0.616704 |
| C | -3.065934 | 1.952882  | 0.310453  |
| C | -5.267815 | 3.615698  | -0.152099 |
| C | -4.334988 | 1.587341  | 0.777167  |
| C | -5.430677 | 2.415956  | 0.544998  |
| C | -2.523549 | -1.468960 | 3.766793  |
| C | -2.433956 | -0.995007 | 2.458931  |
| C | -1.750721 | 0.195213  | 2.185586  |
| C | -1.940215 | -0.754291 | 4.813269  |
| C | -1.270557 | 0.441252  | 4.550950  |
| C | -1.173132 | 0.911691  | 3.242472  |
| C | -2.488216 | -0.166613 | -2.032914 |
| C | -1.872393 | -0.448550 | -0.671022 |
| C | -1.299140 | -1.669779 | -0.734533 |
| C | -1.272709 | 0.069693  | -2.972172 |
| C | -0.635837 | -1.334154 | -3.044849 |
| C | -1.568682 | -2.215154 | -2.148736 |
| C | -1.395589 | -3.700880 | -2.383493 |
| C | -2.968758 | -1.580997 | -2.446504 |
| C | -3.416732 | -1.695439 | -3.906676 |
| C | -4.117793 | -2.103832 | -1.580032 |
| C | -0.402948 | -2.359373 | 0.224528  |
| C | -0.776860 | -3.505808 | 0.883773  |
| C | 0.975407  | -1.984659 | 0.502411  |
| S | 0.536953  | -4.140203 | 1.811096  |
| C | 1.617684  | -2.882805 | 1.327412  |
| C | -2.109087 | -4.184545 | 0.927504  |
| C | 3.027464  | -2.915300 | 1.833201  |
| P | 1.678909  | -0.407382 | -0.087965 |
| C | 3.102106  | 0.859929  | 3.522479  |
| C | 2.302495  | 0.358977  | 2.498979  |
| C | 4.452175  | 1.127830  | 3.286856  |
| C | 2.843742  | 0.105397  | 1.231146  |
| C | 4.993844  | 0.884481  | 2.025620  |
| C | 4.195075  | 0.374971  | 1.000685  |
| C | 3.810868  | 0.068843  | -3.514968 |
| C | 3.023741  | 0.281283  | -2.383591 |
| C | 4.288299  | -1.209367 | -3.809490 |
| C | 2.730665  | -0.792862 | -1.528752 |
| C | 3.979451  | -2.281011 | -2.970507 |
| C | 3.204103  | -2.074442 | -1.829949 |
| H | -1.915778 | 3.440512  | -0.746059 |
| H | -3.873260 | 4.924573  | -1.159108 |
| H | -6.129053 | 4.263617  | -0.331942 |
| H | -4.472168 | 0.649243  | 1.321329  |

|    |           |           |           |
|----|-----------|-----------|-----------|
| H  | -6.418530 | 2.124936  | 0.910059  |
| H  | -3.052633 | -2.403325 | 3.968939  |
| H  | -2.893523 | -1.557737 | 1.644298  |
| H  | -2.009117 | -1.130195 | 5.836777  |
| H  | -0.813928 | 1.005846  | 5.367081  |
| H  | -0.634680 | 1.841763  | 3.037295  |
| H  | -3.246522 | 0.627518  | -2.056758 |
| H  | -0.589719 | 0.827995  | -2.558260 |
| H  | -1.599587 | 0.429651  | -3.958197 |
| H  | 0.397965  | -1.358219 | -2.675070 |
| H  | -0.612264 | -1.725800 | -4.072823 |
| H  | -1.570304 | -3.939191 | -3.444195 |
| H  | -2.092416 | -4.304994 | -1.785566 |
| H  | -0.372211 | -4.024525 | -2.136174 |
| H  | -4.283813 | -1.039932 | -4.086553 |
| H  | -3.735264 | -2.726536 | -4.127997 |
| H  | -2.643849 | -1.427048 | -4.637860 |
| H  | -5.049987 | -1.574746 | -1.833824 |
| H  | -3.945257 | -1.962235 | -0.505502 |
| H  | -4.291685 | -3.176350 | -1.763069 |
| H  | -2.830286 | -3.652783 | 0.295310  |
| H  | -2.511139 | -4.201379 | 1.953149  |
| H  | -2.051970 | -5.227314 | 0.578596  |
| H  | 3.133815  | -2.345375 | 2.769850  |
| H  | 3.720647  | -2.481976 | 1.101170  |
| H  | 3.345945  | -3.948938 | 2.031729  |
| H  | 2.665823  | 1.045999  | 4.506885  |
| H  | 1.245355  | 0.156678  | 2.688849  |
| H  | 5.080940  | 1.527152  | 4.086046  |
| H  | 6.049214  | 1.091790  | 1.833772  |
| H  | 4.633959  | 0.190791  | 0.017398  |
| H  | 4.040865  | 0.905396  | -4.179302 |
| H  | 2.611508  | 1.276687  | -2.160485 |
| H  | 4.894279  | -1.374226 | -4.703735 |
| H  | 4.343260  | -3.284201 | -3.205138 |
| H  | 2.955927  | -2.917868 | -1.180520 |
| Cu | 0.417430  | 1.531952  | -0.315265 |
| H  | 1.533422  | 5.234717  | -2.570756 |
| H  | 2.752520  | 5.897866  | -1.444814 |
| H  | 3.117535  | 4.440494  | -2.410028 |
| C  | 2.325100  | 4.966405  | -1.852792 |
| H  | -0.149226 | 5.110504  | -0.667688 |
| C  | 1.752337  | 4.045194  | -0.761300 |
| H  | 1.046191  | 5.717534  | 0.511698  |
| O  | 1.233972  | 2.914790  | -1.363084 |
| C  | 0.662151  | 4.810177  | 0.015323  |
| H  | 3.662168  | 3.098170  | -0.312532 |
| H  | 3.360480  | 4.550221  | 0.683303  |
| C  | 2.883951  | 3.670816  | 0.217078  |
| H  | 0.224040  | 4.154997  | 0.787863  |
| H  | 2.491679  | 3.029307  | 1.024769  |

31

Figure 8 para-H-styrene-Cu-OtBu / electronic energy: -2182.55158904 a.u. / lowest freq: 27.42 cm-1

|    |           |           |           |
|----|-----------|-----------|-----------|
| C  | -1.928903 | 0.522589  | 0.151598  |
| C  | -2.367593 | -0.225683 | 1.253706  |
| C  | -2.102115 | -0.011349 | -1.135516 |
| C  | -2.688512 | -1.261082 | -1.309804 |
| C  | -3.114996 | -1.999957 | -0.203840 |
| C  | -2.955887 | -1.476382 | 1.078595  |
| H  | -1.771969 | 0.551062  | -2.011760 |
| H  | -2.813794 | -1.663778 | -2.317510 |
| H  | -3.574222 | -2.981095 | -0.344130 |
| H  | -3.288621 | -2.045895 | 1.949330  |
| H  | -2.235906 | 0.177972  | 2.261012  |
| C  | -1.259656 | 1.821554  | 0.396510  |
| C  | -0.717088 | 2.656046  | -0.552234 |
| H  | -1.320811 | 2.184359  | 1.429681  |
| H  | -0.795346 | 2.453802  | -1.625268 |
| H  | -0.394506 | 3.662142  | -0.268341 |
| H  | 4.530550  | -0.752582 | -0.259174 |
| H  | 4.027421  | -1.250156 | 1.372998  |
| C  | 3.815244  | -1.377041 | 0.299445  |
| O  | 2.253156  | 0.399694  | 0.393393  |
| H  | 3.992832  | -2.431959 | 0.032888  |
| C  | 2.377225  | -0.924049 | -0.002265 |
| H  | 2.762220  | -0.403423 | -2.080931 |
| H  | 1.541412  | -1.679023 | 1.858641  |
| C  | 2.104007  | -1.077496 | -1.509356 |
| C  | 1.391935  | -1.816035 | 0.775636  |
| H  | 2.263369  | -2.107308 | -1.870669 |
| H  | 1.509123  | -2.887576 | 0.542110  |
| H  | 1.058778  | -0.800471 | -1.732575 |
| H  | 0.351559  | -1.530222 | 0.541548  |
| Cu | 0.717611  | 1.355859  | 0.135178  |

62

Figure 8 para-H-styrene-Cu-OtBu\_dimer\_01 / electronic energy: -4365.17726958 a.u. / lowest freq: 25.56 cm-1

|   |          |           |           |
|---|----------|-----------|-----------|
| H | 3.514741 | 1.263553  | 1.925814  |
| H | 5.285243 | -0.183045 | 1.255991  |
| H | 2.378842 | 3.063934  | -0.336596 |
| C | 3.205909 | 1.480231  | 0.897132  |
| C | 2.459566 | 2.624335  | 0.662653  |
| C | 4.965692 | -0.143930 | 0.211265  |
| H | 6.441398 | -1.576387 | -0.435288 |
| C | 3.899793 | 0.691762  | -0.149860 |
| C | 5.615781 | -0.928861 | -0.739990 |
| H | 2.202239 | 3.282115  | 1.497710  |
| C | 3.504478 | 0.722838  | -1.497777 |



|    |           |           |           |
|----|-----------|-----------|-----------|
| C  | 5.210664  | -0.892490 | -2.073396 |
| H  | 2.661500  | 1.347589  | -1.804722 |
| C  | 4.153265  | -0.060209 | -2.447728 |
| H  | 5.713910  | -1.511945 | -2.819337 |
| H  | 3.824774  | -0.027722 | -3.489360 |
| H  | -0.303018 | -2.577066 | 2.643930  |
| H  | -0.540015 | -3.224369 | 1.002910  |
| C  | 0.215723  | -3.006743 | 1.772313  |
| O  | 0.603227  | -0.820814 | 0.894786  |
| H  | 0.676314  | -3.960194 | 2.076988  |
| C  | 1.254122  | -2.010759 | 1.239259  |
| H  | 1.786857  | -1.237377 | 3.199080  |
| H  | 1.230603  | -2.821042 | -0.777899 |
| C  | 2.278679  | -1.728301 | 2.344034  |
| C  | 1.964689  | -2.595471 | 0.011531  |
| H  | 2.757558  | -2.652523 | 2.704881  |
| H  | 2.513218  | -3.522433 | 0.245501  |
| H  | 3.069543  | -1.061905 | 1.973065  |
| H  | 2.680949  | -1.863001 | -0.392188 |
| Cu | 1.221328  | 1.039117  | 0.721374  |
| C  | -3.649322 | -0.943566 | -0.943916 |
| C  | -4.639697 | -0.102034 | -1.469518 |
| C  | -3.900003 | -1.582538 | 0.282378  |
| C  | -5.099235 | -1.378329 | 0.958293  |
| C  | -6.073426 | -0.530064 | 0.427465  |
| C  | -5.839997 | 0.104731  | -0.791649 |
| H  | -3.139290 | -2.227831 | 0.728896  |
| H  | -5.270698 | -1.877633 | 1.914922  |
| H  | -7.010927 | -0.365274 | 0.963517  |
| H  | -6.595215 | 0.769819  | -1.217233 |
| H  | -4.463056 | 0.402042  | -2.423223 |
| C  | -2.366288 | -1.098817 | -1.670615 |
| C  | -1.479229 | -2.146842 | -1.483265 |
| H  | -2.254738 | -0.468990 | -2.560381 |
| H  | -1.714312 | -2.987277 | -0.823933 |
| H  | -0.692514 | -2.326082 | -2.222587 |
| H  | -0.323920 | 3.415865  | 1.673142  |
| H  | -0.055639 | 3.992546  | 0.006587  |
| C  | -0.819492 | 3.633154  | 0.713362  |
| O  | -0.559833 | 1.370900  | -0.052384 |
| H  | -1.541977 | 4.448150  | 0.880529  |
| C  | -1.506546 | 2.375613  | 0.169166  |
| H  | -2.029840 | 1.583854  | 2.119040  |
| H  | -1.446474 | 3.059835  | -1.890748 |
| C  | -2.542373 | 1.886588  | 1.191607  |
| C  | -2.193658 | 2.710779  | -1.160256 |
| H  | -3.287585 | 2.659559  | 1.440242  |
| H  | -2.964437 | 3.490963  | -1.050652 |
| H  | -3.080335 | 1.009257  | 0.801930  |
| H  | -2.674578 | 1.811787  | -1.571714 |
| Cu | -0.856185 | -0.556907 | -0.400441 |

62

Figure 8 para-H-styrene-Cu-OtBu dimer O2 / electronic energy: -4365.17671872 a.u. / lowest freq: 25.56 cm-1

|    |           |           |           |
|----|-----------|-----------|-----------|
| H  | 2.308649  | 2.256767  | 2.184766  |
| H  | 0.388875  | 3.520111  | 1.583267  |
| H  | 4.231863  | 0.808153  | 1.740181  |
| C  | 2.510166  | 1.944596  | 1.154310  |
| C  | 3.592141  | 1.115489  | 0.907320  |
| C  | 0.575064  | 3.370053  | 0.517117  |
| H  | -1.147256 | 4.515144  | -0.086180 |
| C  | 1.676425  | 2.599809  | 0.116974  |
| C  | -0.292894 | 3.922167  | -0.421370 |
| H  | 4.022470  | 0.996924  | -0.090895 |
| C  | 1.883514  | 2.397597  | -1.258240 |
| C  | -0.079761 | 3.710153  | -1.784036 |
| H  | 2.725960  | 1.795163  | -1.604666 |
| C  | 1.013582  | 2.946606  | -2.197095 |
| H  | -0.764436 | 4.135257  | -2.521684 |
| H  | 1.189908  | 2.773467  | -3.261429 |
| H  | 1.263227  | -4.123931 | -0.715768 |
| H  | 0.810620  | -3.150201 | -2.136145 |
| C  | 1.660823  | -3.488719 | -1.522934 |
| O  | 1.504485  | -1.584471 | -0.100993 |
| H  | 2.318293  | -4.104281 | -2.157685 |
| C  | 2.393555  | -2.281054 | -0.927854 |
| H  | 3.218871  | -3.401331 | 0.742156  |
| H  | 2.055729  | -0.988989 | -2.644029 |
| C  | 3.576381  | -2.757652 | -0.077038 |
| C  | 2.903085  | -1.375389 | -2.056720 |
| H  | 4.312237  | -3.326082 | -0.668228 |
| H  | 3.584635  | -1.905524 | -2.741084 |
| H  | 4.089866  | -1.891441 | 0.371707  |
| H  | 3.443573  | -0.514093 | -1.634780 |
| Cu | 1.833829  | 0.065211  | 0.932770  |
| C  | -2.991697 | -0.173798 | -1.096967 |
| C  | -3.755992 | 0.925929  | -0.682557 |
| C  | -3.494085 | -1.463692 | -0.860570 |
| C  | -4.721398 | -1.642558 | -0.228588 |
| C  | -5.474157 | -0.538318 | 0.177912  |
| C  | -4.986870 | 0.747285  | -0.053895 |
| H  | -2.914080 | -2.340749 | -1.158905 |
| H  | -5.093255 | -2.653959 | -0.047940 |
| H  | -6.435690 | -0.682045 | 0.676041  |
| H  | -5.565146 | 1.618648  | 0.262656  |
| H  | -3.369181 | 1.935130  | -0.847020 |
| C  | -1.682586 | 0.072238  | -1.742572 |
| C  | -0.940773 | -0.848805 | -2.465565 |

|    |           |           |           |
|----|-----------|-----------|-----------|
| H  | -1.411153 | 1.131538  | -1.829631 |
| H  | -1.300494 | -1.868064 | -2.639986 |
| H  | -0.151372 | -0.497972 | -3.136403 |
| H  | 1.147002  | -0.412360 | 3.482448  |
| H  | 0.184375  | 1.079902  | 3.662452  |
| C  | 0.121089  | -0.016978 | 3.583525  |
| O  | -0.144638 | 0.153703  | 1.217187  |
| H  | -0.300164 | -0.406608 | 4.524417  |
| C  | -0.720450 | -0.412601 | 2.361607  |
| H  | 0.238308  | -2.339349 | 2.045700  |
| H  | -2.129386 | 1.231868  | 2.553725  |
| C  | -0.767988 | -1.944772 | 2.251591  |
| C  | -2.145262 | 0.130968  | 2.523228  |
| H  | -1.162028 | -2.415898 | 3.166915  |
| H  | -2.626069 | -0.238104 | 3.443989  |
| H  | -1.420208 | -2.243842 | 1.412795  |
| H  | -2.767239 | -0.174237 | 1.669091  |
| Cu | -0.212020 | -0.696389 | -0.582250 |

98

Figure 8\_L3a-Cu-OtBu / electronic energy: -4500.61984018 a.u. / lowest freq: -20.29 cm-1

|   |           |           |           |
|---|-----------|-----------|-----------|
| P | -1.580542 | 0.896725  | 0.507317  |
| C | -2.908207 | 3.157185  | -0.383641 |
| C | -4.006725 | 3.985801  | -0.616704 |
| C | -3.065934 | 1.952882  | 0.310453  |
| C | -5.267815 | 3.615698  | -0.152099 |
| C | -4.334988 | 1.587341  | 0.777167  |
| C | -5.430677 | 2.415956  | 0.544998  |
| C | -2.523549 | -1.468960 | 3.766793  |
| C | -2.433956 | -0.995007 | 2.458931  |
| C | -1.750721 | 0.195213  | 2.185586  |
| C | -1.940215 | -0.754291 | 4.813269  |
| C | -1.270557 | 0.441252  | 4.550950  |
| C | -1.173132 | 0.911691  | 3.242472  |
| C | -2.488216 | -0.166613 | -2.032914 |
| C | -1.872393 | -0.448550 | -0.671022 |
| C | -1.299140 | -1.669779 | -0.734533 |
| C | -1.272709 | 0.069693  | -2.972172 |
| C | -0.635837 | -1.334154 | -3.044849 |
| C | -1.568682 | -2.215154 | -2.148736 |
| C | -1.395589 | -3.700880 | -2.383493 |
| C | -2.968758 | -1.580997 | -2.446504 |
| C | -3.416732 | -1.695439 | -3.906676 |
| C | -4.117793 | -2.103832 | -1.580032 |
| C | -0.402948 | -2.359373 | 0.224528  |
| C | -0.776860 | -3.505808 | 0.883773  |
| C | 0.975407  | -1.984659 | 0.502411  |
| S | 0.536953  | -4.140203 | 1.811096  |
| C | 1.617684  | -2.882805 | 1.327412  |
| C | -2.109087 | -4.184545 | 0.927504  |
| C | 3.027464  | -2.915300 | 1.833201  |
| P | 1.678909  | -0.407382 | -0.087965 |
| C | 3.102106  | 0.859929  | 3.522479  |
| C | 2.302495  | 0.358977  | 2.498979  |
| C | 4.452175  | 1.127830  | 3.286856  |
| C | 2.843742  | 0.105397  | 1.231146  |
| C | 4.993844  | 0.884481  | 2.025620  |
| C | 4.195075  | 0.374971  | 1.000685  |
| C | 3.810868  | 0.068843  | -3.514968 |
| C | 3.023741  | 0.281283  | -2.383591 |
| C | 4.288299  | -1.209367 | -3.809490 |
| C | 2.730665  | -0.792862 | -1.528752 |
| C | 3.979451  | -2.281011 | -2.970507 |
| C | 3.204103  | -2.074442 | -1.829949 |
| H | -1.915778 | 3.440512  | -0.746059 |
| H | -3.873260 | 4.924573  | -1.159108 |
| H | -6.129053 | 4.263617  | -0.331942 |
| H | -4.472168 | 0.649243  | 1.321329  |
| H | -6.418530 | 2.124936  | 0.910059  |
| H | -3.052633 | -2.403325 | 3.968939  |
| H | -2.893523 | -1.557737 | 1.644298  |
| H | -2.009117 | -1.130195 | 5.836777  |
| H | -0.813928 | 1.005846  | 5.367081  |
| H | -0.634680 | 1.841763  | 3.037295  |
| H | -3.246522 | 0.627518  | -2.056758 |
| H | -0.589719 | 0.827995  | -2.558260 |
| H | -1.599587 | 0.429651  | -3.958197 |
| H | 0.397965  | -1.358219 | -2.675070 |
| H | -0.612264 | -1.725800 | -4.072823 |
| H | -1.570304 | -3.939191 | -3.444195 |
| H | -2.092416 | -4.304994 | -1.785566 |
| H | -0.372211 | -4.024525 | -2.136174 |
| H | -4.283813 | -1.039932 | -4.086553 |
| H | -3.735264 | -2.726536 | -4.127997 |
| H | -2.643849 | -1.427048 | -4.637860 |
| H | -5.049987 | -1.574746 | -1.833824 |
| H | -3.945257 | -1.962235 | -0.505502 |
| H | -4.291685 | -3.176350 | -1.763069 |
| H | -2.830286 | -3.652783 | 0.295310  |
| H | -2.511139 | -4.201379 | 1.953149  |
| H | -2.051970 | -5.227314 | 0.578596  |
| H | 3.133815  | -2.345375 | 2.769850  |
| H | 3.720647  | -2.481976 | 1.101170  |
| H | 3.345945  | -3.948938 | 2.031729  |
| H | 2.665823  | 1.045999  | 4.506885  |
| H | 1.245355  | 0.156678  | 2.688849  |
| H | 5.080940  | 1.527152  | 4.086046  |
| H | 6.049214  | 1.091790  | 1.833772  |

|    |           |           |           |
|----|-----------|-----------|-----------|
| H  | 4.633959  | 0.190791  | 0.017398  |
| H  | 4.040865  | 0.905396  | -4.179302 |
| H  | 2.611508  | 1.276687  | -2.160485 |
| H  | 4.894279  | -1.374226 | -4.703735 |
| H  | 4.343260  | -3.284201 | -3.205138 |
| H  | 2.955927  | -2.917868 | -1.180520 |
| Cu | 0.417430  | 1.531952  | -0.315265 |
| H  | 1.533422  | 5.234717  | -2.570756 |
| H  | 2.752520  | 5.897866  | -1.444814 |
| H  | 3.117535  | 4.440494  | -2.410028 |
| C  | 2.325100  | 4.966405  | -1.852792 |
| H  | -0.149226 | 5.110504  | -0.667688 |
| C  | 1.752337  | 4.045194  | -0.761300 |
| H  | 1.046191  | 5.717534  | 0.511698  |
| O  | 1.233972  | 2.914790  | -1.363084 |
| C  | 0.662151  | 4.810177  | 0.015323  |
| H  | 3.662168  | 3.098170  | -0.312532 |
| H  | 3.360480  | 4.550221  | 0.683303  |
| C  | 2.883951  | 3.670816  | 0.217078  |
| H  | 0.224040  | 4.154997  | 0.787863  |
| H  | 2.491679  | 3.029307  | 1.024769  |

37

Figure 8 para-CO2Me-styrene-Cu-OtBu / electronic energy: -2410.19525632 a.u. / lowest freq: 22.92 cm-1

|    |           |           |           |
|----|-----------|-----------|-----------|
| O  | 4.336955  | 0.759818  | 1.270722  |
| C  | 3.813648  | 0.295280  | 0.286819  |
| H  | 6.377229  | 0.525856  | -0.503619 |
| H  | 5.509179  | 2.083275  | -0.668008 |
| O  | 4.342290  | 0.376550  | -0.932416 |
| C  | 5.585015  | 1.055967  | -1.052360 |
| H  | 5.822111  | 1.073396  | -2.122151 |
| C  | 0.010075  | -1.714613 | 0.394777  |
| C  | 0.582229  | -1.171455 | 1.554508  |
| C  | 0.718612  | -1.618072 | -0.813666 |
| C  | 1.948488  | -0.976825 | -0.864820 |
| C  | 2.504190  | -0.423182 | 0.295604  |
| C  | 1.815193  | -0.531701 | 1.506735  |
| H  | 0.301415  | -2.034699 | -1.732230 |
| H  | 2.481274  | -0.897947 | -1.812852 |
| H  | 2.252815  | -0.101531 | 2.409225  |
| H  | 0.045094  | -1.242163 | 2.503364  |
| C  | -1.342937 | -2.314111 | 0.481494  |
| C  | -2.079671 | -2.809549 | -0.567100 |
| H  | -1.717994 | -2.466818 | 1.500272  |
| H  | -1.687861 | -2.868343 | -1.587441 |
| H  | -2.998795 | -3.367964 | -0.366085 |
| H  | -2.944270 | 1.978775  | 2.074160  |
| H  | -1.417812 | 2.872316  | 1.807937  |
| C  | -2.008539 | 1.995866  | 1.492595  |
| H  | -1.435711 | 1.088443  | 1.750046  |
| H  | -4.066576 | 3.290377  | 0.191900  |
| C  | -3.113534 | 3.274596  | -0.360508 |
| H  | -2.555499 | 4.193638  | -0.116482 |
| Cu | -2.537132 | -0.824824 | -0.280275 |
| O  | -3.124385 | 0.907277  | -0.332852 |
| C  | -2.331382 | 1.997552  | -0.012765 |
| H  | -3.349866 | 3.287741  | -1.436568 |
| C  | -1.010162 | 1.982770  | -0.803870 |
| H  | -0.408892 | 1.098739  | -0.528849 |
| H  | -0.393737 | 2.878382  | -0.618903 |
| H  | -1.221520 | 1.924120  | -1.884025 |

74

Figure 8 para-CO2Me-styrene-Cu-OtBu dimer\_01 / electronic energy: -4820.46849056 a.u. / lowest freq: 9.94 cm-1

|   |           |           |           |
|---|-----------|-----------|-----------|
| H | 8.207656  | -3.073852 | -2.206264 |
| H | 6.791426  | -3.872773 | -2.971309 |
| C | 7.177623  | -3.425166 | -2.048494 |
| O | 7.528837  | -1.893880 | 0.083288  |
| O | 6.313860  | -2.340173 | -1.739697 |
| C | 6.596392  | -1.640021 | -0.641189 |
| H | 7.174299  | -4.173172 | -1.242481 |
| H | 3.029102  | 3.112524  | 1.456027  |
| H | 5.040726  | 1.907923  | 1.897441  |
| H | 2.204195  | 3.165499  | -1.537744 |
| C | 2.905806  | 2.680005  | 0.456970  |
| C | 2.120184  | 3.356994  | -0.463192 |
| C | 4.912895  | 1.307793  | 0.993455  |
| H | 6.611886  | 0.045339  | 1.421087  |
| C | 3.854951  | 1.594026  | 0.118494  |
| C | 5.794364  | 0.265560  | 0.732178  |
| H | 1.645334  | 4.300304  | -0.179134 |
| C | 3.712049  | 0.803993  | -1.035393 |
| C | 5.637159  | -0.521284 | -0.412425 |
| H | 2.883631  | 0.986637  | -1.724143 |
| C | 4.588414  | -0.239849 | -1.297761 |
| H | 4.455031  | -0.850326 | -2.191652 |
| H | -0.488721 | -0.383560 | 3.772220  |
| H | -0.281710 | -1.841067 | 2.770552  |
| C | 0.253998  | -1.093361 | 3.374652  |
| O | 0.605045  | 0.312803  | 1.480027  |
| H | 0.726094  | -1.614518 | 4.222927  |
| C | 1.280494  | -0.347074 | 2.513143  |
| H | 1.278319  | 1.439825  | 3.746910  |
| H | 1.785883  | -2.104920 | 1.336183  |
| C | 1.998680  | 0.689260  | 3.384453  |
| C | 2.299531  | -1.337817 | 1.936386  |
| H | 2.485122  | 0.225804  | 4.257506  |
| H | 2.875299  | -1.849098 | 2.724685  |
| H | 2.773720  | 1.208475  | 2.803436  |

|    |           |           |           |
|----|-----------|-----------|-----------|
| H  | 3.007518  | -0.811606 | 1.278522  |
| Cu | 1.043118  | 1.862872  | 0.351970  |
| C  | -3.055830 | -1.632233 | -0.703274 |
| C  | -3.893850 | -1.418929 | -1.808088 |
| C  | -3.620658 | -1.580705 | 0.582384  |
| C  | -4.971514 | -1.312487 | 0.756345  |
| C  | -5.795534 | -1.085075 | -0.353709 |
| C  | -5.245055 | -1.145225 | -1.637338 |
| H  | -2.991580 | -1.725453 | 1.463575  |
| H  | -5.392309 | -1.264134 | 1.761307  |
| H  | -5.889326 | -0.967285 | -2.500356 |
| H  | -3.473192 | -1.456577 | -2.815614 |
| C  | -1.610261 | -1.858824 | -0.926552 |
| C  | -0.743417 | -2.431558 | -0.008167 |
| H  | -1.284771 | -1.781761 | -1.969723 |
| H  | -1.097868 | -2.828513 | 0.947904  |
| H  | 0.229786  | -2.799353 | -0.346792 |
| H  | -1.057723 | 4.057696  | -0.551737 |
| H  | -0.124095 | 3.639973  | -2.013077 |
| C  | -1.113513 | 3.568849  | -1.537358 |
| O  | -0.690986 | 1.458245  | -0.471207 |
| H  | -1.827736 | 4.130893  | -2.159894 |
| C  | -1.537813 | 2.104993  | -1.377442 |
| H  | -3.026655 | 2.597835  | 0.127282  |
| H  | -0.418893 | 1.371006  | -3.083949 |
| C  | -2.971280 | 2.057177  | -0.830784 |
| C  | -1.465565 | 1.406191  | -2.740727 |
| H  | -3.698224 | 2.506697  | -1.526565 |
| H  | -2.066395 | 1.921117  | -3.507682 |
| H  | -3.273063 | 1.015793  | -0.647988 |
| H  | -1.832273 | 0.372377  | -2.660071 |
| Cu | -0.587779 | -0.423172 | 0.106000  |
| H  | -9.242075 | 0.553178  | 1.021017  |
| H  | -9.205667 | -0.656851 | 2.348441  |
| C  | -9.032291 | -0.495590 | 1.278350  |
| O  | -7.969001 | -0.494953 | -1.148000 |
| O  | -7.666015 | -0.808816 | 1.044898  |
| C  | -7.245856 | -0.765195 | -0.219101 |
| H  | -9.692129 | -1.147860 | 0.688645  |

74

Figure 8 para-CO2Me-styrene-Cu-OtBu dimer\_02 / electronic energy: -4820.47029487 a.u. / lowest freq: 18.80 cm<sup>-1</sup>

|    |           |           |           |
|----|-----------|-----------|-----------|
| H  | -3.170699 | 0.139976  | -3.213871 |
| H  | -1.193383 | 1.447568  | -3.334783 |
| H  | -5.089447 | -0.847681 | -2.052155 |
| C  | -3.388709 | 0.450599  | -2.186507 |
| C  | -4.464149 | -0.120434 | -1.526078 |
| C  | -1.405916 | 1.929328  | -2.378396 |
| H  | 0.407266  | 3.098395  | -2.394125 |
| C  | -2.562890 | 1.567775  | -1.672219 |
| C  | -0.505997 | 2.844410  | -1.852768 |
| H  | -4.904781 | 0.327194  | -0.631216 |
| C  | -2.813754 | 2.188507  | -0.436443 |
| C  | -0.740773 | 3.424426  | -0.601517 |
| H  | -3.709539 | 1.937045  | 0.135202  |
| C  | -1.912671 | 3.102484  | 0.094750  |
| H  | -2.107621 | 3.559008  | 1.065995  |
| H  | -2.127368 | -3.667020 | 2.628875  |
| H  | -1.814156 | -2.093659 | 3.403617  |
| C  | -2.602695 | -2.741224 | 2.989108  |
| O  | -2.381778 | -1.799356 | 0.811081  |
| H  | -3.296878 | -3.000154 | 3.804324  |
| C  | -3.314496 | -2.034370 | 1.829848  |
| H  | -3.989714 | -3.881380 | 0.905291  |
| H  | -3.128771 | -0.036235 | 2.670618  |
| C  | -4.421696 | -2.938595 | 1.276404  |
| C  | -3.922181 | -0.713633 | 2.318864  |
| H  | -5.180273 | -3.180211 | 2.037992  |
| H  | -4.639126 | -0.862554 | 3.142078  |
| H  | -4.928219 | -2.442349 | 0.432210  |
| H  | -4.451387 | -0.212287 | 1.493692  |
| Cu | -2.686203 | -0.954373 | -0.930102 |
| C  | 1.964927  | 0.256658  | 1.181923  |
| C  | 2.674598  | 1.079042  | 0.294326  |
| C  | 2.569670  | -0.931482 | 1.624285  |
| C  | 3.837498  | -1.289239 | 1.185705  |
| C  | 4.536281  | -0.463482 | 0.294815  |
| C  | 3.944798  | 0.725419  | -0.143072 |
| H  | 2.036168  | -1.598883 | 2.304695  |
| H  | 4.290579  | -2.219487 | 1.530568  |
| H  | 4.490189  | 1.367220  | -0.837195 |
| H  | 2.216285  | 2.003591  | -0.065884 |
| C  | 0.600887  | 0.660547  | 1.582697  |
| C  | -0.149090 | 0.121484  | 2.616113  |
| H  | 0.265064  | 1.608231  | 1.147953  |
| H  | 0.245593  | -0.663606 | 3.269193  |
| H  | -1.007934 | 0.677038  | 3.002455  |
| H  | -1.745726 | -2.515230 | -2.963219 |
| H  | -0.789226 | -1.214364 | -3.722578 |
| C  | -0.720179 | -2.149664 | -3.144922 |
| O  | -0.692402 | -0.888179 | -1.121343 |
| H  | -0.198182 | -2.898831 | -3.761621 |
| C  | -0.003559 | -1.893050 | -1.811980 |
| H  | -0.993019 | -3.491025 | -0.719444 |
| H  | 1.416060  | -0.460817 | -2.625936 |
| C  | 0.030415  | -3.191247 | -0.991524 |
| C  | 1.429101  | -1.418837 | -2.083136 |
| H  | 0.516324  | -4.017400 | -1.535909 |

|    |           |           |           |
|----|-----------|-----------|-----------|
| H  | 2.001799  | -2.149259 | -2.677616 |
| H  | 0.588197  | -3.032362 | -0.052648 |
| H  | 1.961389  | -1.261274 | -1.133949 |
| Cu | -0.715474 | -0.704379 | 0.859807  |
| H  | 1.917573  | 5.076522  | 1.928604  |
| H  | 0.541280  | 5.781670  | 2.844206  |
| C  | 0.944436  | 5.581615  | 1.845026  |
| O  | 1.317039  | 4.639410  | -0.604178 |
| O  | -0.005038 | 4.746899  | 1.195703  |
| C  | 0.296462  | 4.330730  | -0.033886 |
| H  | 1.074957  | 6.527671  | 1.300012  |
| H  | 7.634086  | -2.544406 | -1.277507 |
| H  | 7.823014  | -3.347636 | 0.317298  |
| C  | 7.621566  | -2.396071 | -0.187738 |
| O  | 6.525735  | -0.120929 | -0.982584 |
| O  | 6.337987  | -1.974999 | 0.252252  |
| C  | 5.892140  | -0.810506 | -0.219616 |
| H  | 8.391747  | -1.659139 | 0.081515  |

29

Figure 9\_Cu-(OtBu)<sub>2</sub> anion / electronic energy: -2106.15712863 a.u. / lowest freq: 16.07 cm<sup>-1</sup>

|    |           |           |           |
|----|-----------|-----------|-----------|
| Cu | 0.000000  | -0.539536 | 0.000001  |
| O  | 1.743050  | -0.619185 | -0.567556 |
| C  | 2.750285  | 0.136326  | -0.016010 |
| C  | 4.059753  | -0.198057 | -0.756660 |
| C  | 2.935008  | -0.180735 | 1.482953  |
| C  | 2.464302  | 1.644928  | -0.168920 |
| H  | 4.275008  | -1.274381 | -0.657174 |
| H  | 4.928514  | 0.366911  | -0.378124 |
| H  | 3.943890  | 0.018695  | -1.831004 |
| H  | 3.109171  | -1.261228 | 1.614436  |
| H  | 2.013628  | 0.074766  | 2.033469  |
| H  | 3.776349  | 0.366015  | 1.943917  |
| H  | 1.545088  | 1.906102  | 0.382524  |
| H  | 2.290043  | 1.879226  | -1.231876 |
| H  | 3.283509  | 2.285879  | 0.201447  |
| H  | -2.290020 | 1.879251  | 1.231830  |
| H  | -1.545079 | 1.906086  | -0.382578 |
| H  | -3.283496 | 2.285878  | -0.201492 |
| C  | -2.464290 | 1.644930  | 0.168881  |
| C  | -2.750284 | 0.136326  | 0.016010  |
| H  | -3.943869 | 0.018743  | 1.831020  |
| O  | -1.743050 | -0.619179 | 0.567561  |
| H  | -2.013652 | 0.074711  | -2.033477 |
| H  | -4.928508 | 0.366936  | 0.378144  |
| H  | -3.776369 | 0.365976  | -1.943911 |
| C  | -4.059747 | -0.198030 | 0.756682  |
| C  | -2.935027 | -0.180769 | -1.482943 |
| H  | -4.275010 | -1.274355 | 0.657222  |
| H  | -3.109200 | -1.261264 | -1.614398 |

53

Figure 9\_para-NMe2-styrene-Cu-(OtBu)<sub>2</sub> anion\_01 / electronic energy: -2549.33388221 a.u. / lowest freq: 17.24 cm<sup>-1</sup>

|    |           |           |           |
|----|-----------|-----------|-----------|
| H  | 3.160642  | -0.812668 | 2.186115  |
| C  | 3.915360  | -0.483155 | 0.167792  |
| C  | 2.943236  | -0.871970 | 1.119739  |
| H  | 4.236086  | -0.259957 | -1.974989 |
| C  | 3.540694  | -0.561908 | -1.191966 |
| C  | 1.689509  | -1.322972 | 0.726927  |
| H  | 0.969994  | -1.590523 | 1.505471  |
| C  | 2.278223  | -1.013545 | -1.562946 |
| C  | 1.317894  | -1.409674 | -0.623601 |
| H  | 2.026460  | -1.045711 | -2.627099 |
| C  | -0.024508 | -1.840004 | -1.067572 |
| H  | -1.780758 | -3.056011 | -0.784427 |
| C  | -0.947334 | -2.541079 | -0.297617 |
| H  | -0.718803 | -2.873717 | 0.720297  |
| Cu | -1.417526 | -0.586535 | -0.252156 |
| H  | -0.180490 | -1.797553 | -2.151965 |
| H  | 6.298032  | -0.273942 | -1.219753 |
| H  | 5.687146  | 1.379962  | -0.946577 |
| C  | 6.075690  | 0.475015  | -0.441150 |
| H  | 7.026228  | 0.738384  | 0.039061  |
| N  | 5.165662  | -0.044103 | 0.551579  |
| H  | 4.785822  | 0.937153  | 2.404243  |
| H  | 6.482705  | 0.512798  | 2.066467  |
| C  | 5.445924  | 0.173510  | 1.950827  |
| H  | 5.336782  | -0.754941 | 2.536487  |
| H  | -4.229794 | 1.875619  | 0.750935  |
| H  | -3.494862 | 1.321664  | -0.768129 |
| H  | -5.290825 | 1.307456  | -0.567073 |
| C  | -4.322013 | 1.136840  | -0.063917 |
| C  | -4.172411 | -0.293129 | 0.504616  |
| H  | -4.983494 | 0.203601  | 2.458872  |
| H  | -6.245550 | -0.320185 | 1.305379  |
| H  | -3.798586 | -1.147907 | -1.473066 |
| O  | -2.914213 | -0.497329 | 1.011745  |
| H  | -5.523025 | -1.201590 | -1.017310 |
| C  | -5.205238 | -0.492142 | 1.633125  |
| C  | -4.493842 | -1.297405 | -0.628401 |
| H  | -5.132187 | -1.516547 | 2.035080  |
| H  | -4.358538 | -2.328224 | -0.260870 |
| O  | -1.062158 | 1.161865  | -1.033945 |
| C  | -0.540063 | 2.200215  | -0.302804 |
| C  | -0.629895 | 1.945968  | 1.218534  |
| C  | -1.313739 | 3.497715  | -0.626238 |
| C  | 0.946539  | 2.415468  | -0.667732 |
| H  | -1.649426 | 1.619327  | 1.475367  |
| H  | -0.353592 | 2.829257  | 1.821824  |

|   |           |          |           |
|---|-----------|----------|-----------|
| H | 0.051198  | 1.123386 | 1.501301  |
| H | -2.359751 | 3.408267 | -0.292441 |
| H | -1.323562 | 3.654919 | -1.717424 |
| H | -0.877934 | 4.393992 | -0.150389 |
| H | 1.045562  | 2.588196 | -1.752501 |
| H | 1.525409  | 1.510888 | -0.421818 |
| H | 1.404547  | 3.270065 | -0.137684 |

53

Figure 9 para-NMe2-styrene-Cu-(OtBu)2\_anion\_02 / electronic energy: -2549.33285744 a.u. / lowest freq: 28.21 cm-1

|    |           |           |           |
|----|-----------|-----------|-----------|
| H  | 3.655175  | -2.335738 | 0.268832  |
| C  | 3.838769  | -0.190331 | -0.065215 |
| C  | 3.213522  | -1.353718 | 0.438453  |
| H  | 3.622319  | 1.975820  | -0.173381 |
| C  | 3.198129  | 1.043124  | 0.198717  |
| C  | 2.027534  | -1.277901 | 1.162724  |
| H  | 1.590112  | -2.207926 | 1.535461  |
| C  | 2.013976  | 1.095519  | 0.921753  |
| C  | 1.393992  | -0.056014 | 1.427576  |
| H  | 1.538589  | 2.065248  | 1.085165  |
| C  | 0.114404  | 0.059664  | 2.160012  |
| H  | -0.468588 | -2.037843 | 2.275303  |
| C  | -0.724561 | -0.997394 | 2.497634  |
| H  | -1.497680 | -0.857456 | 3.259721  |
| Cu | -1.387829 | -0.133732 | 0.803745  |
| H  | -0.058841 | 1.033097  | 2.633600  |
| H  | 4.903781  | 1.427021  | -2.076044 |
| H  | 5.815319  | 1.701003  | -0.568140 |
| C  | 5.579752  | 0.949742  | -1.342317 |
| H  | 6.516073  | 0.706972  | -1.859667 |
| N  | 5.018808  | -0.252528 | -0.775087 |
| H  | 5.847433  | -2.104933 | -0.166357 |
| H  | 6.547133  | -1.381521 | -1.626494 |
| C  | 5.608050  | -1.533439 | -1.080366 |
| H  | 4.951413  | -2.164946 | -1.707847 |
| H  | -3.919180 | -0.462674 | -2.141797 |
| H  | -2.162672 | -0.215110 | -1.998320 |
| H  | -2.815620 | -1.523304 | -3.060904 |
| C  | -2.946208 | -0.982741 | -2.105982 |
| C  | -2.893529 | -1.906438 | -0.867215 |
| H  | -5.030122 | -2.305668 | -0.819202 |
| H  | -4.138559 | -3.464181 | -1.847676 |
| H  | -0.714483 | -2.069327 | -0.954907 |
| O  | -2.953118 | -1.180729 | 0.294982  |
| H  | -1.535566 | -3.386512 | -1.834881 |
| C  | -4.092163 | -2.877031 | -0.913491 |
| C  | -1.591682 | -2.739898 | -0.941132 |
| H  | -4.044955 | -3.580815 | -0.065519 |
| H  | -1.509726 | -3.380125 | -0.046746 |
| O  | -1.072333 | 1.289490  | -0.493735 |
| C  | -1.815747 | 2.441724  | -0.466561 |
| C  | -3.166152 | 2.242388  | 0.259407  |
| C  | -2.103105 | 2.899272  | -1.913239 |
| C  | -1.037300 | 3.566554  | 0.255304  |
| H  | -3.661305 | 1.340997  | -0.133073 |
| H  | -3.843636 | 3.109851  | 0.167638  |
| H  | -2.993688 | 2.065170  | 1.336521  |
| H  | -2.726920 | 2.151579  | -2.429521 |
| H  | -1.152772 | 2.979878  | -2.466087 |
| H  | -2.620291 | 3.873523  | -1.967872 |
| H  | -0.076577 | 3.745189  | -0.255412 |
| H  | -0.814245 | 3.257218  | 1.290258  |
| H  | -1.589024 | 4.522861  | 0.297994  |

29

Figure 9 Cu-(OtBu)2\_anion / electronic energy: -2106.15712863 a.u. / lowest freq: 16.07 cm-1

|    |           |           |           |
|----|-----------|-----------|-----------|
| Cu | 0.000000  | -0.539536 | 0.000001  |
| O  | 1.743050  | -0.619185 | -0.567556 |
| C  | 2.750285  | 0.136326  | -0.016010 |
| C  | 4.059753  | -0.198057 | -0.756660 |
| C  | 2.935008  | -0.180735 | 1.482953  |
| C  | 2.464302  | 1.644928  | -0.168920 |
| H  | 4.275008  | -1.274381 | -0.657174 |
| H  | 4.928514  | 0.366911  | -0.378124 |
| H  | 3.943890  | 0.018695  | -1.831004 |
| H  | 3.109171  | -1.261228 | 1.614436  |
| H  | 2.013628  | 0.074766  | 2.033469  |
| H  | 3.776349  | 0.366015  | 1.943917  |
| H  | 1.545088  | 1.906102  | 0.382524  |
| H  | 2.290043  | 1.879226  | -1.231876 |
| H  | 3.283509  | 2.285879  | 0.201447  |
| H  | -2.290020 | 1.879251  | 1.231830  |
| H  | -1.545079 | 1.906086  | -0.382578 |
| H  | -3.283496 | 2.285878  | -0.201492 |
| C  | -2.464290 | 1.644930  | 0.168881  |
| C  | -2.750284 | 0.136326  | 0.016010  |
| H  | -3.943869 | 0.018743  | 1.831020  |
| O  | -1.743050 | -0.619179 | 0.567561  |
| H  | -2.013652 | 0.074711  | -2.033477 |
| H  | -4.928508 | 0.366936  | 0.378144  |
| H  | -3.776369 | 0.365976  | -1.943911 |
| C  | -4.059747 | -0.198030 | 0.756682  |
| C  | -2.935027 | -0.180769 | -1.482943 |
| H  | -4.275010 | -1.274355 | 0.657222  |
| H  | -3.109200 | -1.261264 | -1.614398 |

45

Figure 9 para-H-styrene-Cu-(OtBu)2\_anion\_01 / electronic energy: -2415.49693836 a.u. / lowest freq: 30.61 cm-1

|   |          |           |          |
|---|----------|-----------|----------|
| H | 3.783420 | -0.545963 | 2.673200 |
| C | 4.652875 | -0.193333 | 0.726185 |

|    |           |           |           |
|----|-----------|-----------|-----------|
| C  | 3.644748  | -0.623847 | 1.591881  |
| H  | 5.230920  | 0.047135  | -1.342025 |
| C  | 4.454145  | -0.289482 | -0.650752 |
| C  | 2.454379  | -1.140870 | 1.088434  |
| H  | 1.671339  | -1.450034 | 1.785201  |
| C  | 3.261361  | -0.806275 | -1.153571 |
| C  | 2.238070  | -1.241913 | -0.297281 |
| H  | 3.110744  | -0.866664 | -2.234791 |
| C  | 0.977469  | -1.752910 | -0.874801 |
| H  | -0.724957 | -3.068054 | -0.765674 |
| C  | 0.016665  | -2.499222 | -0.197542 |
| H  | 0.151523  | -2.811624 | 0.843117  |
| Cu | -0.555804 | -0.580748 | -0.216432 |
| H  | 0.936053  | -1.727979 | -1.969811 |
| H  | 5.582994  | 0.219040  | 1.124433  |
| H  | -3.575350 | 1.708622  | 0.559463  |
| H  | -2.659772 | 1.261537  | -0.895395 |
| H  | -4.463936 | 1.162839  | -0.889732 |
| C  | -3.547115 | 1.008629  | -0.293078 |
| C  | -3.390848 | -0.439932 | 0.221271  |
| H  | -4.419071 | -0.087931 | 2.103242  |
| H  | -5.530556 | -0.590230 | 0.794865  |
| H  | -2.764735 | -1.175833 | -1.739664 |
| O  | -2.184609 | -0.614347 | 0.852400  |
| H  | -4.523153 | -1.324750 | -1.479347 |
| C  | -4.523960 | -0.742206 | 1.222517  |
| C  | -3.538876 | -1.398210 | -0.984292 |
| H  | -4.449833 | -1.784874 | 1.573941  |
| H  | -3.395997 | -2.440232 | -0.653247 |
| O  | -0.194895 | 1.195461  | -0.914309 |
| C  | 0.194629  | 2.245336  | -0.117672 |
| C  | -0.014252 | 1.946370  | 1.383323  |
| C  | -0.623626 | 3.503861  | -0.483920 |
| C  | 1.691273  | 2.557841  | -0.344868 |
| H  | -1.035562 | 1.566719  | 1.543077  |
| H  | 0.162747  | 2.825653  | 2.027842  |
| H  | 0.680969  | 1.151491  | 1.707095  |
| H  | -1.688037 | 3.348955  | -0.247100 |
| H  | -0.545778 | 3.686283  | -1.568395 |
| H  | -0.283442 | 4.411401  | 0.045438  |
| H  | 1.872948  | 2.759445  | -1.413820 |
| H  | 2.303365  | 1.686923  | -0.061727 |
| H  | 2.045859  | 3.427861  | 0.236612  |

45

Figure 9 para-H-styrene-Cu-(OtBu)<sub>2</sub> anion\_02 / electronic energy: -2415.49618477 a.u. / lowest freq: 24.43 cm<sup>-1</sup>

|    |           |           |           |
|----|-----------|-----------|-----------|
| H  | -3.821039 | -2.889254 | 1.259373  |
| C  | -4.241037 | -0.778254 | 1.448990  |
| C  | -3.600215 | -1.884352 | 0.890176  |
| H  | -4.439064 | 1.373695  | 1.394024  |
| C  | -3.948404 | 0.497502  | 0.962367  |
| C  | -2.677390 | -1.718731 | -0.141741 |
| H  | -2.192115 | -2.599644 | -0.568498 |
| C  | -3.024005 | 0.662431  | -0.064833 |
| C  | -2.371249 | -0.441152 | -0.638535 |
| H  | -2.783785 | 1.664372  | -0.426288 |
| C  | -1.370495 | -0.212153 | -1.703334 |
| H  | -0.561138 | -2.226126 | -1.926121 |
| C  | -0.512574 | -1.175377 | -2.226939 |
| H  | 0.010262  | -0.981246 | -3.168566 |
| Cu | 0.423678  | -0.146417 | -0.774194 |
| H  | -1.464420 | 0.746713  | -2.225195 |
| H  | -4.965270 | -0.908556 | 2.256774  |
| H  | 3.581235  | 0.062622  | 1.451859  |
| H  | 1.825245  | 0.053080  | 1.738227  |
| H  | 2.903805  | -1.070748 | 2.654105  |
| C  | 2.719086  | -0.588486 | 1.677262  |
| C  | 2.514515  | -1.598736 | 0.525863  |
| H  | 4.616163  | -1.696153 | -0.016427 |
| H  | 4.170298  | -2.901175 | 1.226724  |
| H  | 0.464279  | -2.052576 | 1.136667  |
| O  | 2.188781  | -0.956407 | -0.643797 |
| H  | 1.655875  | -3.169313 | 1.854270  |
| C  | 3.823081  | -2.386791 | 0.313550  |
| C  | 1.407044  | -2.594597 | 0.944564  |
| H  | 3.689300  | -3.141654 | -0.479155 |
| H  | 1.219722  | -3.310477 | 0.126725  |
| O  | 0.221566  | 1.310031  | 0.506808  |
| C  | 0.786431  | 2.534357  | 0.244484  |
| C  | 1.889514  | 2.443050  | -0.833537 |
| C  | 1.413802  | 3.099972  | 1.536836  |
| C  | -0.294385 | 3.523101  | -0.249638 |
| H  | 2.592619  | 1.637811  | -0.571379 |
| H  | 2.441810  | 3.389732  | -0.969167 |
| H  | 1.443509  | 2.173698  | -1.808248 |
| H  | 2.241084  | 2.452471  | 1.868671  |
| H  | 0.656053  | 3.109119  | 2.336889  |
| H  | 1.807091  | 4.124964  | 1.417086  |
| H  | -1.085341 | 3.624832  | 0.511691  |
| H  | -0.761528 | 3.130834  | -1.168268 |
| H  | 0.103594  | 4.529368  | -0.471433 |

29

Figure 9 Cu-(OtBu)<sub>2</sub> anion / electronic energy: -2106.15712863 a.u. / lowest freq: 16.07 cm<sup>-1</sup>

|    |          |           |           |
|----|----------|-----------|-----------|
| Cu | 0.000000 | -0.539536 | 0.000001  |
| O  | 1.743050 | -0.619185 | -0.567556 |
| C  | 2.750285 | 0.136326  | -0.016010 |
| C  | 4.059753 | -0.198057 | -0.756660 |
| C  | 2.935008 | -0.180735 | 1.482953  |

|   |           |           |           |
|---|-----------|-----------|-----------|
| C | 2.464302  | 1.644928  | -0.168920 |
| H | 4.275008  | -1.274381 | -0.657174 |
| H | 4.928514  | 0.366911  | -0.378124 |
| H | 3.943890  | 0.018695  | -1.831004 |
| H | 3.109171  | -1.261228 | 1.614436  |
| H | 2.013628  | 0.074766  | 2.033469  |
| H | 3.776349  | 0.366015  | 1.943917  |
| H | 1.545088  | 1.906102  | 0.382524  |
| H | 2.290043  | 1.879226  | -1.231876 |
| H | 3.283509  | 2.285879  | 0.201447  |
| H | -2.290020 | 1.879251  | 1.231830  |
| H | -1.545079 | 1.906086  | -0.382578 |
| H | -3.283496 | 2.285878  | -0.201492 |
| C | -2.464290 | 1.644930  | 0.168881  |
| C | -2.750284 | 0.136326  | 0.016010  |
| H | -3.943869 | 0.018743  | 1.831020  |
| O | -1.743050 | -0.619179 | 0.567561  |
| H | -2.013652 | 0.074711  | -2.033477 |
| H | -4.928508 | 0.366936  | 0.378144  |
| H | -3.776369 | 0.365976  | -1.943911 |
| C | -4.059747 | -0.198030 | 0.756682  |
| C | -2.935027 | -0.180769 | -1.482943 |
| H | -4.275010 | -1.274355 | 0.657222  |
| H | -3.109200 | -1.261264 | -1.614398 |

51

Figure 9\_para-CO2Me-styrene-Cu-(OtBu)2\_anion\_01 / electronic energy: -2643.14335830 a.u. / lowest freq: 8.97 cm<sup>-1</sup>

|    |           |           |           |
|----|-----------|-----------|-----------|
| H  | 3.193351  | -2.501304 | 0.308090  |
| C  | 3.510815  | -0.375753 | 0.189639  |
| C  | 2.785691  | -1.517859 | 0.550170  |
| H  | 3.537888  | 1.786325  | 0.220021  |
| C  | 2.987892  | 0.886969  | 0.501153  |
| C  | 1.572612  | -1.404789 | 1.215799  |
| H  | 1.033476  | -2.313153 | 1.492107  |
| C  | 1.772893  | 0.996522  | 1.162993  |
| C  | 1.041525  | -0.143489 | 1.540162  |
| H  | 1.364567  | 1.984095  | 1.386038  |
| C  | -0.252989 | 0.025560  | 2.225719  |
| H  | -0.928790 | -2.050112 | 2.304519  |
| C  | -1.153688 | -0.999376 | 2.507354  |
| H  | -1.964887 | -0.823519 | 3.220379  |
| Cu | -1.655284 | -0.114785 | 0.772991  |
| H  | -0.405514 | 1.004376  | 2.693060  |
| H  | -4.027532 | -0.343343 | -2.293586 |
| H  | -2.273820 | -0.134393 | -2.067172 |
| H  | -2.903703 | -1.413421 | -3.175855 |
| C  | -3.067708 | -0.882940 | -2.220729 |
| C  | -3.089594 | -1.825371 | -0.996597 |
| H  | -5.229663 | -2.196612 | -1.056892 |
| H  | -4.302878 | -3.352011 | -2.057767 |
| H  | -0.909942 | -2.015376 | -0.973009 |
| O  | -3.203609 | -1.114262 | 0.173632  |
| H  | -1.702127 | -3.303416 | -1.917506 |
| C  | -4.295571 | -2.778939 | -1.114088 |
| C  | -1.795900 | -2.673530 | -1.015518 |
| H  | -4.297641 | -3.494453 | -0.274914 |
| H  | -1.767666 | -3.332584 | -0.131573 |
| O  | -1.206167 | 1.302430  | -0.480460 |
| C  | -1.915094 | 2.479181  | -0.483900 |
| C  | -3.291687 | 2.327604  | 0.202441  |
| C  | -2.145401 | 2.934639  | -1.940787 |
| C  | -1.121146 | 3.581663  | 0.253326  |
| H  | -3.810690 | 1.448435  | -0.209503 |
| H  | -3.931288 | 3.220858  | 0.092628  |
| H  | -3.157673 | 2.142899  | 1.283780  |
| H  | -2.773616 | 2.200945  | -2.471145 |
| H  | -1.177671 | 2.988179  | -2.465800 |
| H  | -2.634861 | 3.921699  | -2.014790 |
| H  | -0.142057 | 3.727100  | -0.232184 |
| H  | -0.936186 | 3.272360  | 1.295668  |
| H  | -1.644127 | 4.554381  | 0.275353  |
| H  | 7.044407  | 1.550088  | -1.525073 |
| H  | 6.597542  | 0.048012  | -2.402266 |
| C  | 6.688054  | 0.519488  | -1.412538 |
| O  | 5.425160  | 0.600048  | -0.770457 |
| H  | 7.402201  | -0.057727 | -0.807167 |
| C  | 4.815585  | -0.557479 | -0.500137 |
| O  | 5.293915  | -1.630990 | -0.785085 |

51

Figure 9\_para-CO2Me-styrene-Cu-(OtBu)2\_anion\_02 / electronic energy: -2643.14401653 a.u. / lowest freq: -0.92 cm<sup>-1</sup>

|    |           |           |           |
|----|-----------|-----------|-----------|
| H  | 2.945242  | -0.961419 | 2.203217  |
| C  | 3.597816  | -0.593670 | 0.183750  |
| C  | 2.664184  | -0.995285 | 1.148686  |
| H  | 3.946245  | -0.312483 | -1.929752 |
| C  | 3.232266  | -0.626650 | -1.167264 |
| C  | 1.398658  | -1.422049 | 0.774955  |
| H  | 0.685854  | -1.711800 | 1.549930  |
| C  | 1.963612  | -1.054139 | -1.537734 |
| C  | 1.019301  | -1.461343 | -0.580264 |
| H  | 1.688096  | -1.066138 | -2.595211 |
| C  | -0.322708 | -1.878343 | -1.023523 |
| H  | -2.111385 | -3.037393 | -0.715181 |
| C  | -1.273416 | -2.523934 | -0.235597 |
| H  | -1.066529 | -2.827126 | 0.795544  |
| Cu | -1.666316 | -0.560614 | -0.239267 |
| H  | -0.469867 | -1.865270 | -2.109220 |
| H  | -4.449144 | 1.944204  | 0.666978  |
| H  | -3.712498 | 1.365644  | -0.841071 |



|   |           |           |           |
|---|-----------|-----------|-----------|
| H | -5.507956 | 1.380770  | -0.655233 |
| C | -4.547139 | 1.199430  | -0.141323 |
| C | -4.428945 | -0.226257 | 0.441902  |
| H | -5.266519 | 0.303534  | 2.375994  |
| H | -6.513057 | -0.223406 | 1.207107  |
| H | -4.029097 | -1.105905 | -1.518649 |
| O | -3.182047 | -0.442724 | 0.976462  |
| H | -5.761690 | -1.129944 | -1.094951 |
| C | -5.480652 | -0.400673 | 1.555638  |
| C | -4.741893 | -1.237474 | -0.685660 |
| H | -5.423395 | -1.420604 | 1.970794  |
| H | -4.629352 | -2.266248 | -0.305327 |
| O | -1.220048 | 1.168498  | -0.990820 |
| C | -0.711046 | 2.197653  | -0.235003 |
| C | -0.850820 | 1.933932  | 1.280107  |
| C | -1.461023 | 3.503335  | -0.576467 |
| C | 0.787933  | 2.396290  | -0.553032 |
| H | -1.883894 | 1.627451  | 1.506071  |
| H | -0.574386 | 2.807313  | 1.897036  |
| H | -0.194738 | 1.096032  | 1.577405  |
| H | -2.519485 | 3.421063  | -0.282307 |
| H | -1.429203 | 3.667935  | -1.666138 |
| H | -1.034308 | 4.392043  | -0.079091 |
| H | 0.923219  | 2.571735  | -1.633363 |
| H | 1.347986  | 1.483987  | -0.291819 |
| H | 1.238847  | 3.243252  | -0.005491 |
| H | 7.525474  | 0.938724  | -0.974402 |
| H | 7.606154  | -0.157147 | 0.446675  |
| C | 7.040462  | 0.655319  | -0.033138 |
| O | 5.729367  | 0.230912  | -0.371237 |
| H | 7.014326  | 1.519412  | 0.646781  |
| C | 4.940844  | -0.146494 | 0.638979  |
| O | 5.299432  | -0.123973 | 1.793389  |

30

Figure 9\_Cu-(OtBu)<sub>2</sub>Na / electronic energy: -2268.34902130 a.u. / lowest freq: 24.55 cm<sup>-1</sup>

|    |           |           |           |
|----|-----------|-----------|-----------|
| Cu | -0.145500 | 0.143878  | -0.384317 |
| Na | 1.729878  | 2.552487  | 0.142140  |
| O  | 1.650416  | 0.461646  | -0.010248 |
| C  | 2.575778  | -0.582942 | 0.082575  |
| C  | 3.916715  | 0.012518  | 0.534562  |
| C  | 2.745245  | -1.254875 | -1.287017 |
| C  | 2.099517  | -1.619806 | 1.109510  |
| H  | 4.267069  | 0.762279  | -0.195412 |
| H  | 4.704175  | -0.751652 | 0.632016  |
| H  | 3.803052  | 0.507767  | 1.513437  |
| H  | 3.064162  | -0.512510 | -2.036090 |
| H  | 1.782458  | -1.676061 | -1.620322 |
| H  | 3.489836  | -2.067182 | -1.265784 |
| H  | 1.144077  | -2.062045 | 0.781932  |
| H  | 1.929619  | -1.135991 | 2.084658  |
| H  | 2.827300  | -2.435942 | 1.248346  |
| H  | -2.475911 | -2.204990 | 0.598228  |
| H  | -1.726390 | -1.012535 | 1.685966  |
| H  | -3.468077 | -1.379250 | 1.836005  |
| C  | -2.642197 | -1.246438 | 1.116123  |
| C  | -2.915941 | -0.136800 | 0.081686  |
| H  | -4.111386 | -1.424861 | -1.198315 |
| O  | -1.898530 | -0.052830 | -0.847731 |
| H  | -2.161792 | 1.445449  | 1.371383  |
| H  | -5.091247 | -0.539194 | 0.005527  |
| H  | -3.921198 | 1.192201  | 1.549921  |
| C  | -4.220012 | -0.465994 | -0.666483 |
| C  | -3.089490 | 1.202891  | 0.824926  |
| H  | -4.426646 | 0.311360  | -1.419553 |
| H  | -3.271028 | 2.011482  | 0.098261  |

54

Figure 9\_para-NMe2-styrene-Cu-(OtBu)<sub>2</sub>Na<sub>01</sub> / electronic energy: -2711.56379480 a.u. / lowest freq: 25.95 cm<sup>-1</sup>

|    |           |           |           |
|----|-----------|-----------|-----------|
| H  | 0.090234  | 0.449078  | -2.776777 |
| H  | 2.435531  | 0.907145  | -2.501549 |
| H  | -0.815485 | -2.294763 | -1.648334 |
| C  | 0.094490  | -0.365685 | -2.043749 |
| C  | -0.925638 | -1.305161 | -2.102655 |
| C  | 2.500531  | 0.199453  | -1.670159 |
| H  | 4.547520  | 0.698682  | -1.313575 |
| C  | 1.370379  | -0.548743 | -1.317571 |
| C  | 3.708235  | 0.082518  | -0.991538 |
| H  | -1.698347 | -1.217391 | -2.872482 |
| C  | 1.509477  | -1.432715 | -0.236007 |
| C  | 3.847997  | -0.809225 | 0.097157  |
| H  | 0.650898  | -2.022040 | 0.097612  |
| C  | 2.704658  | -1.565019 | 0.455971  |
| H  | 2.744600  | -2.264701 | 1.290574  |
| H  | -1.714289 | 4.413542  | 0.471485  |
| H  | -1.242314 | 3.687363  | 2.034507  |
| C  | -0.870950 | 3.984682  | 1.037891  |
| O  | -1.311574 | 1.823320  | 0.163676  |
| H  | -0.121865 | 4.779752  | 1.188186  |
| C  | -0.301361 | 2.761215  | 0.296103  |
| H  | -0.627785 | 3.589393  | -1.686837 |
| H  | 0.503603  | 1.875299  | 2.113136  |
| C  | 0.211705  | 3.212050  | -1.080770 |
| C  | 0.863664  | 2.181234  | 1.116758  |
| H  | 0.974062  | 4.005729  | -1.010250 |
| H  | 1.686517  | 2.902537  | 1.255306  |
| H  | 0.658979  | 2.360985  | -1.613725 |
| H  | 1.270461  | 1.288216  | 0.619029  |
| Cu | -1.393573 | 0.060269  | -0.696256 |

|    |           |           |           |
|----|-----------|-----------|-----------|
| H  | -1.811404 | -2.829446 | 0.289756  |
| H  | -2.122970 | -2.282572 | 1.954471  |
| C  | -2.602238 | -2.662880 | 1.037814  |
| O  | -3.010175 | -0.405400 | 0.317999  |
| H  | -3.063915 | -3.637855 | 1.266021  |
| C  | -3.619067 | -1.632846 | 0.516147  |
| H  | -3.470774 | -2.287263 | -1.556666 |
| H  | -4.297014 | -1.097394 | 2.518990  |
| C  | -4.247359 | -2.147722 | -0.789309 |
| C  | -4.729150 | -1.456538 | 1.568978  |
| H  | -4.772842 | -3.107974 | -0.655810 |
| H  | -5.271582 | -2.393109 | 1.779145  |
| H  | -4.969347 | -1.409271 | -1.174233 |
| H  | -5.463287 | -0.709967 | 1.221947  |
| Na | -3.092616 | 1.486896  | 1.310066  |
| H  | 4.390456  | -1.482080 | 2.727997  |
| C  | 5.109114  | -1.784537 | 1.944969  |
| H  | 6.115528  | -1.721554 | 2.375679  |
| H  | 5.987410  | 0.952338  | 0.549876  |
| N  | 5.034266  | -0.936396 | 0.778386  |
| H  | 4.915359  | -2.844570 | 1.703300  |
| H  | 7.034865  | -0.408557 | 1.018827  |
| C  | 6.170827  | -0.128308 | 0.404097  |
| H  | 6.451849  | -0.282442 | -0.651778 |

54

Figure 9\_para-NMe2-styrene-Cu-(OtBu)<sub>2</sub>Na<sub>02</sub> / electronic energy: -2711.56379480 a.u. / lowest freq: 25.96 cm<sup>-1</sup>

|    |           |           |           |
|----|-----------|-----------|-----------|
| H  | -5.987399 | 0.952340  | 0.549866  |
| C  | -6.170821 | -0.128306 | 0.404098  |
| H  | -7.034856 | -0.408545 | 1.018838  |
| H  | -4.390448 | -1.482091 | 2.727996  |
| N  | -5.034260 | -0.936393 | 0.778389  |
| H  | -6.451851 | -0.282451 | -0.651773 |
| H  | -6.115522 | -1.721548 | 2.375684  |
| C  | -5.109111 | -1.784539 | 1.944968  |
| H  | -4.915365 | -2.844573 | 1.703295  |
| H  | 2.123004  | -2.282553 | 1.954498  |
| H  | 1.811400  | -2.829415 | 0.289788  |
| C  | 2.602251  | -2.662860 | 1.037830  |
| O  | 3.010183  | -0.405386 | 0.318007  |
| H  | 3.063923  | -3.637841 | 1.266022  |
| C  | 3.619077  | -1.632832 | 0.516147  |
| H  | 4.297052  | -1.097370 | 2.518977  |
| H  | 3.470756  | -2.287259 | -1.556663 |
| C  | 4.729174  | -1.456526 | 1.568963  |
| C  | 4.247350  | -2.147713 | -0.789316 |
| H  | 5.271597  | -2.393102 | 1.779130  |
| H  | 4.772835  | -3.107964 | -0.655819 |
| H  | 5.463315  | -0.709965 | 1.221918  |
| H  | 4.969333  | -1.409264 | -1.174253 |
| Na | 3.092598  | 1.486915  | 1.310080  |
| C  | -1.370374 | -0.548758 | -1.317573 |
| C  | -2.500525 | 0.199437  | -1.670166 |
| C  | -1.509473 | -1.432725 | -0.236006 |
| C  | -2.704654 | -1.565024 | 0.455973  |
| C  | -3.847993 | -0.809229 | 0.097156  |
| C  | -3.708230 | 0.082505  | -0.991545 |
| H  | -0.650896 | -2.022050 | 0.097616  |
| H  | -2.744597 | -2.264703 | 1.290579  |
| H  | -4.547515 | 0.698668  | -1.313586 |
| H  | -2.435525 | 0.907125  | -2.501559 |
| C  | -0.094481 | -0.365701 | -2.043746 |
| C  | 0.925652  | -1.305173 | -2.102636 |
| H  | -0.090224 | 0.449056  | -2.776782 |
| H  | 0.815503  | -2.294772 | -1.648307 |
| H  | 1.698362  | -1.217405 | -2.872462 |
| H  | 1.242270  | 3.687373  | 2.034503  |
| H  | 1.714268  | 4.413539  | 0.471481  |
| C  | 0.870920  | 3.984684  | 1.037879  |
| O  | 1.311557  | 1.823314  | 0.163689  |
| H  | 0.121833  | 4.779755  | 1.188155  |
| C  | 0.301342  | 2.761211  | 0.296093  |
| H  | -0.503653 | 1.875313  | 2.113122  |
| H  | 0.627796  | 3.589371  | -1.686849 |
| C  | -0.863697 | 2.181237  | 1.116735  |
| C  | -0.211704 | 3.212034  | -1.080791 |
| H  | -1.686551 | 2.902543  | 1.255262  |
| H  | -0.974060 | 4.005715  | -1.010288 |
| H  | -1.270485 | 1.288215  | 0.619009  |
| H  | -0.658972 | 2.360966  | -1.613746 |
| Cu | 1.393578  | 0.060270  | -0.696249 |

30

Figure 9\_Cu-(OtBu)<sub>2</sub>Na / electronic energy: -2268.34902130 a.u. / lowest freq: 24.55 cm<sup>-1</sup>

|    |           |           |           |
|----|-----------|-----------|-----------|
| Cu | -0.145500 | 0.143878  | -0.384317 |
| Na | 1.729878  | 2.552487  | 0.142140  |
| O  | 1.650416  | 0.461646  | -0.010248 |
| C  | 2.575778  | -0.582942 | 0.082575  |
| C  | 3.916715  | 0.012518  | 0.534562  |
| C  | 2.745245  | -1.254875 | -1.287017 |
| C  | 2.099517  | -1.619806 | 1.109510  |
| H  | 4.267069  | 0.762279  | -0.195412 |
| H  | 4.704175  | -0.751652 | 0.632016  |
| H  | 3.803052  | 0.507767  | 1.513437  |
| H  | 3.064162  | -0.512510 | -2.036090 |
| H  | 1.782458  | -1.676061 | -1.620322 |
| H  | 3.489836  | -2.067182 | -1.265784 |
| H  | 1.144077  | -2.062045 | 0.781932  |
| H  | 1.929619  | -1.135991 | 2.084658  |

|   |           |           |           |
|---|-----------|-----------|-----------|
| H | 2.827300  | -2.435942 | 1.248346  |
| H | -2.475911 | -2.204990 | 0.598228  |
| H | -1.726390 | -1.012535 | 1.685966  |
| H | -3.468077 | -1.379250 | 1.836005  |
| C | -2.642197 | -1.246438 | 1.116123  |
| C | -2.915941 | -0.136800 | 0.081686  |
| H | -4.111386 | -1.424861 | -1.198315 |
| O | -1.898530 | -0.052830 | -0.847731 |
| H | -2.161792 | 1.445449  | 1.371383  |
| H | -5.091247 | -0.539194 | 0.005527  |
| H | -3.921198 | 1.192201  | 1.549921  |
| C | -4.220012 | -0.465994 | -0.666483 |
| C | -3.089490 | 1.202891  | 0.824926  |
| H | -4.426646 | 0.311360  | -1.419553 |
| H | -3.271028 | 2.011482  | 0.098261  |

46

Figure 9\_para-H-styrene-Cu-(OtBu)<sub>2</sub>Na\_01 / electronic energy: -2577.72481829 a.u. / lowest freq: 26.15 cm<sup>-1</sup>

|    |           |           |           |
|----|-----------|-----------|-----------|
| H  | 2.404371  | -1.426215 | 2.217877  |
| H  | 1.857272  | -2.445880 | 0.866553  |
| C  | 2.736710  | -1.950285 | 1.306905  |
| O  | 2.403369  | 0.046996  | 0.011008  |
| H  | 3.457828  | -2.731148 | 1.600153  |
| C  | 3.328443  | -0.940216 | 0.309087  |
| H  | 4.266077  | 0.252579  | 1.878347  |
| H  | 2.919446  | -2.195054 | -1.427316 |
| C  | 4.557640  | -0.270541 | 0.951114  |
| C  | 3.773609  | -1.678367 | -0.964356 |
| H  | 5.349603  | -0.992186 | 1.210428  |
| H  | 4.557020  | -2.428091 | -0.764936 |
| H  | 4.988273  | 0.471392  | 0.257908  |
| H  | 4.166518  | -0.955494 | -1.697541 |
| Na | 2.202969  | 2.094209  | 0.616971  |
| C  | -2.097327 | -1.333228 | -0.526504 |
| C  | -3.392540 | -0.903884 | -0.850133 |
| C  | -1.893822 | -1.948323 | 0.719704  |
| C  | -2.948853 | -2.120068 | 1.610750  |
| C  | -4.232541 | -1.680761 | 1.278652  |
| C  | -4.449850 | -1.074471 | 0.042218  |
| H  | -0.891133 | -2.274560 | 1.007638  |
| H  | -2.767077 | -2.594439 | 2.578181  |
| H  | -5.057220 | -1.809619 | 1.983485  |
| H  | -5.449698 | -0.727791 | -0.230313 |
| H  | -3.570112 | -0.421724 | -1.815083 |
| C  | -0.994833 | -1.105150 | -1.489262 |
| C  | 0.188291  | -1.831012 | -1.528447 |
| H  | -1.268337 | -0.515036 | -2.371226 |
| H  | 0.368094  | -2.672033 | -0.851493 |
| H  | 0.801632  | -1.808969 | -2.434391 |
| H  | -0.050540 | 3.950151  | 1.418870  |
| H  | 0.125594  | 4.359474  | -0.311931 |
| C  | -0.565228 | 3.945887  | 0.442237  |
| O  | 0.184030  | 1.742217  | -0.013682 |
| H  | -1.429421 | 4.626243  | 0.518694  |
| C  | -0.967589 | 2.509008  | 0.060692  |
| H  | -1.405605 | 1.950980  | 2.117188  |
| H  | -0.998591 | 2.887011  | -2.078082 |
| C  | -1.913344 | 1.953864  | 1.138836  |
| C  | -1.690982 | 2.538559  | -1.294670 |
| H  | -2.842125 | 2.541030  | 1.233361  |
| H  | -2.573058 | 3.200159  | -1.290919 |
| H  | -2.187717 | 0.915307  | 0.902073  |
| H  | -2.027511 | 1.527283  | -1.565912 |
| Cu | 0.541305  | -0.093084 | -0.584753 |

46

Figure 9\_para-H-styrene-Cu-(OtBu)<sub>2</sub>Na\_02 / electronic energy: -2577.72480787 a.u. / lowest freq: 31.39 cm<sup>-1</sup>

|    |           |           |           |
|----|-----------|-----------|-----------|
| H  | 1.255243  | -0.534268 | -2.361628 |
| H  | 3.564379  | -0.438844 | -1.827357 |
| H  | -0.357796 | -2.690752 | -0.817788 |
| C  | 0.991276  | -1.119957 | -1.473854 |
| C  | -0.189018 | -1.851089 | -1.499224 |
| C  | 3.394569  | -0.911641 | -0.856403 |
| H  | 5.456356  | -0.728340 | -0.254390 |
| C  | 2.102104  | -1.338053 | -0.518148 |
| C  | 4.458844  | -1.072671 | 0.029443  |
| H  | -0.809282 | -1.837322 | -2.400531 |
| C  | 1.908506  | -1.940402 | 0.735863  |
| C  | 4.251303  | -1.666057 | 1.273796  |
| H  | 0.908233  | -2.264220 | 1.034659  |
| C  | 2.970450  | -2.102449 | 1.620463  |
| H  | 5.081414  | -1.787060 | 1.973643  |
| H  | 2.796383  | -2.566899 | 2.594115  |
| H  | -0.135480 | 4.339437  | -0.344370 |
| H  | 0.075250  | 3.962099  | 1.389846  |
| C  | 0.571960  | 3.943805  | 0.404052  |
| O  | -0.170166 | 1.727663  | 0.000197  |
| H  | 1.432256  | 4.631686  | 0.452681  |
| C  | 0.977153  | 2.503253  | 0.039453  |
| H  | 0.966933  | 2.850417  | -2.104988 |
| H  | 1.456034  | 1.981864  | 2.095997  |
| C  | 1.674729  | 2.515168  | -1.329609 |
| C  | 1.946295  | 1.972258  | 1.108832  |
| H  | 2.554936  | 3.178911  | -1.351783 |
| H  | 2.872284  | 2.567520  | 1.177486  |
| H  | 2.008804  | 1.500997  | -1.592428 |
| H  | 2.223879  | 0.931971  | 0.883707  |
| Cu | -0.538573 | -0.109309 | -0.559328 |
| H  | -1.969083 | -2.538101 | 0.750861  |

|    |           |           |           |
|----|-----------|-----------|-----------|
| H  | -2.477241 | -1.590149 | 2.167903  |
| C  | -2.826254 | -2.030443 | 1.219623  |
| O  | -2.383548 | 0.039419  | 0.079152  |
| H  | -3.588710 | -2.792393 | 1.451908  |
| C  | -3.356506 | -0.922864 | 0.294216  |
| H  | -2.974686 | -2.048606 | -1.530915 |
| H  | -4.253437 | 0.198188  | 1.936076  |
| C  | -3.816052 | -1.539514 | -1.036668 |
| C  | -4.560874 | -0.244163 | 0.972866  |
| H  | -4.628518 | -2.273545 | -0.906411 |
| H  | -5.387729 | -0.944939 | 1.174518  |
| H  | -4.171865 | -0.746370 | -1.714071 |
| H  | -4.950795 | 0.564024  | 0.331313  |
| Na | -2.171847 | 2.085175  | 0.679041  |

30

Figure 9\_Cu-(OtBu)<sub>2</sub>Na / electronic energy: -2268.34902130 a.u. / lowest freq: 24.55 cm<sup>-1</sup>

|    |           |           |           |
|----|-----------|-----------|-----------|
| Cu | -0.145500 | 0.143878  | -0.384317 |
| Na | 1.729878  | 2.552487  | 0.142140  |
| O  | 1.650416  | 0.461646  | -0.010248 |
| C  | 2.575778  | -0.582942 | 0.082575  |
| C  | 3.916715  | 0.012518  | 0.534562  |
| C  | 2.745245  | -1.254875 | -1.287017 |
| C  | 2.099517  | -1.619806 | 1.109510  |
| H  | 4.267069  | 0.762279  | -0.195412 |
| H  | 4.704175  | -0.751652 | 0.632016  |
| H  | 3.803052  | 0.507767  | 1.513437  |
| H  | 3.064162  | -0.512510 | -2.036090 |
| H  | 1.782458  | -1.676061 | -1.620322 |
| H  | 3.489836  | -2.067182 | -1.265784 |
| H  | 1.144077  | -2.062045 | 0.781932  |
| H  | 1.929619  | -1.135991 | 2.084658  |
| H  | 2.827300  | -2.435942 | 1.248346  |
| H  | -2.475911 | -2.204990 | 0.598228  |
| H  | -1.726390 | -1.012535 | 1.685966  |
| H  | -3.468077 | -1.379250 | 1.836005  |
| C  | -2.642197 | -1.246438 | 1.116123  |
| C  | -2.915941 | -0.136800 | 0.081686  |
| H  | -4.111386 | -1.424861 | -1.198315 |
| O  | -1.898530 | -0.052830 | -0.847731 |
| H  | -2.161792 | 1.445449  | 1.371383  |
| H  | -5.091247 | -0.539194 | 0.005527  |
| H  | -3.921198 | 1.192201  | 1.549921  |
| C  | -4.220012 | -0.465994 | -0.666483 |
| C  | -3.089490 | 1.202891  | 0.824926  |
| H  | -4.426646 | 0.311360  | -1.419553 |
| H  | -3.271028 | 2.011482  | 0.098261  |

52

Figure 9\_para-CO2Me-styrene-Cu-(OtBu)<sub>2</sub>Na\_01 / electronic energy: -2805.37090024 a.u. / lowest freq: 24.12 cm<sup>-1</sup>

|    |           |           |           |
|----|-----------|-----------|-----------|
| H  | -2.227102 | -2.408675 | -1.975181 |
| H  | -1.886356 | -2.896267 | -0.298449 |
| C  | -2.686866 | -2.785149 | -1.047001 |
| O  | -3.188787 | -0.533149 | -0.370212 |
| H  | -3.105656 | -3.785121 | -1.247685 |
| C  | -3.747080 | -1.789086 | -0.547986 |
| H  | -4.434432 | -1.316028 | -2.564332 |
| H  | -3.587772 | -2.427372 | 1.531618  |
| C  | -4.857063 | -1.671333 | -1.608564 |
| C  | -4.364327 | -2.306432 | 0.761425  |
| H  | -5.365212 | -2.630188 | -1.802509 |
| H  | -4.870154 | -3.277683 | 0.633058  |
| H  | -5.618402 | -0.945094 | -1.277776 |
| H  | -5.101424 | -1.579770 | 1.139701  |
| Na | -3.349387 | 1.311841  | -1.449362 |
| C  | 1.129747  | -0.365687 | 1.469872  |
| C  | 2.154946  | 0.496068  | 1.888844  |
| C  | 1.412750  | -1.287057 | 0.446763  |
| C  | 2.669923  | -1.339151 | -0.139416 |
| C  | 3.684009  | -0.469023 | 0.282966  |
| C  | 3.414097  | 0.447581  | 1.303880  |
| H  | 0.631110  | -1.959144 | 0.085493  |
| H  | 2.868867  | -2.056016 | -0.936939 |
| H  | 4.204568  | 1.124672  | 1.632894  |
| H  | 1.956149  | 1.220694  | 2.682030  |
| C  | -0.206631 | -0.261506 | 2.094867  |
| C  | -1.156777 | -1.274929 | 2.091868  |
| H  | -0.315987 | 0.553206  | 2.818841  |
| H  | -0.949759 | -2.254405 | 1.650351  |
| H  | -1.977345 | -1.242312 | 2.814766  |
| H  | -1.489586 | 3.489394  | -2.279328 |
| H  | -2.131199 | 4.291406  | -0.815763 |
| C  | -1.220767 | 3.878761  | -1.281644 |
| O  | -1.603615 | 1.760509  | -0.283302 |
| H  | -0.509506 | 4.707680  | -1.431132 |
| C  | -0.640617 | 2.749157  | -0.410983 |
| H  | 0.348937  | 1.783854  | -2.090144 |
| H  | -1.164100 | 3.716304  | 1.464053  |
| C  | 0.614870  | 2.189804  | -1.100332 |
| C  | -0.265168 | 3.320417  | 0.964615  |
| H  | 1.399214  | 2.952417  | -1.239612 |
| H  | 0.481761  | 4.128859  | 0.899829  |
| H  | 1.040396  | 1.368658  | -0.505861 |
| H  | 0.150235  | 2.525019  | 1.600709  |
| Cu | -1.629130 | 0.044011  | 0.652777  |
| H  | 6.735858  | -0.565528 | -2.380992 |
| H  | 6.380810  | -2.308209 | -2.627530 |
| C  | 6.460546  | -1.507056 | -1.883834 |
| O  | 5.947561  | 0.250155  | 0.027687  |

|   |          |           |           |
|---|----------|-----------|-----------|
| O | 5.184469 | -1.403854 | -1.268634 |
| C | 5.049891 | -0.483111 | -0.313265 |
| H | 7.234198 | -1.759818 | -1.144420 |

52

Figure 9 para-CO2Me-styrene-Cu-(OtBu)<sub>2</sub>Na<sub>02</sub> / electronic energy: -2805.37090023 a.u. / lowest freq: 24.12 cm<sup>-1</sup>

|    |           |           |           |
|----|-----------|-----------|-----------|
| H  | 2.227088  | -2.408698 | 1.975162  |
| H  | 1.886344  | -2.896274 | 0.298426  |
| C  | 2.686853  | -2.785165 | 1.046980  |
| O  | 3.188780  | -0.533160 | 0.370212  |
| H  | 3.105640  | -3.785140 | 1.247655  |
| C  | 3.747070  | -1.789100 | 0.547975  |
| H  | 4.434422  | -1.316064 | 2.564327  |
| H  | 3.587762  | -2.427371 | -1.531635 |
| C  | 4.857053  | -1.671360 | 1.608555  |
| C  | 4.364317  | -2.306437 | -0.761440 |
| H  | 5.365199  | -2.630217 | 1.802490  |
| H  | 4.870142  | -3.277689 | -0.633080 |
| H  | 5.618393  | -0.945119 | 1.277775  |
| H  | 5.101415  | -1.579773 | -1.139710 |
| Na | 3.349382  | 1.311819  | 1.449383  |
| C  | -1.129746 | -0.365669 | -1.469873 |
| C  | -2.154953 | 0.496072  | -1.888855 |
| C  | -1.412738 | -1.287029 | -0.446753 |
| C  | -2.669910 | -1.339130 | 0.139427  |
| C  | -3.684007 | -0.469018 | -0.282966 |
| C  | -3.414105 | 0.447576  | -1.303891 |
| H  | -0.631091 | -1.959102 | -0.085475 |
| H  | -2.868847 | -2.055987 | 0.936960  |
| H  | -4.204583 | 1.124655  | -1.632914 |
| H  | -1.956164 | 1.220690  | -2.682049 |
| C  | 0.206631  | -0.261483 | -2.094870 |
| C  | 1.156774  | -1.274910 | -2.091878 |
| H  | 0.315987  | 0.553232  | -2.818839 |
| H  | 0.949752  | -2.254388 | -1.650367 |
| H  | 1.977343  | -1.242290 | -2.814776 |
| H  | 1.489590  | 3.489394  | 2.279340  |
| H  | 2.131216  | 4.291401  | 0.815780  |
| C  | 1.220779  | 3.878763  | 1.281656  |
| O  | 1.603617  | 1.760506  | 0.283319  |
| H  | 0.509522  | 4.707687  | 1.431139  |
| C  | 0.640626  | 2.749162  | 0.410992  |
| H  | -0.348950 | 1.783865  | 2.090145  |
| C  | 1.164127  | 3.716301  | -1.464044 |
| C  | -0.614871 | 2.189819  | 1.100332  |
| C  | 0.265189  | 3.320423  | -0.964609 |
| H  | -1.399209 | 2.952440  | 1.239608  |
| H  | -0.481732 | 4.128874  | -0.899826 |
| H  | -1.040400 | 1.368678  | 0.505856  |
| H  | -0.150222 | 2.525030  | -1.600704 |
| Cu | 1.629128  | 0.044017  | -0.652775 |
| H  | -6.735860 | -0.565544 | 2.380988  |
| H  | -6.380792 | -2.308219 | 2.627535  |
| C  | -6.460535 | -1.507071 | 1.883835  |
| O  | -5.947568 | 0.250135  | -0.027695 |
| O  | -5.184458 | -1.403857 | 1.268637  |
| C  | -5.049890 | -0.483117 | 0.313263  |
| H  | -7.234183 | -1.759846 | 1.144421  |

20

Figure 10 NaOtBu-Cu-Me / electronic energy: -2075.35042459 a.u. / lowest freq: -32.54 cm<sup>-1</sup>

|    |           |           |           |
|----|-----------|-----------|-----------|
| C  | 3.221953  | -0.519783 | 0.005284  |
| Cu | 1.340621  | -0.098414 | -0.003574 |
| H  | -1.478034 | -0.703054 | 2.162038  |
| H  | -2.872543 | 1.024179  | 0.909696  |
| C  | -1.474379 | -1.325291 | 1.252498  |
| H  | -2.320455 | -2.029699 | 1.309466  |
| H  | -0.538976 | -1.908847 | 1.249832  |
| C  | -2.835665 | 0.380576  | 0.014006  |
| H  | -3.735891 | -0.255014 | 0.021840  |
| O  | -0.460359 | 0.451662  | -0.010641 |
| C  | -1.535470 | -0.437480 | 0.000568  |
| H  | -2.889157 | 1.026293  | -0.879249 |
| C  | -1.499572 | -1.324249 | -1.252987 |
| H  | -2.344961 | -2.030679 | -1.292138 |
| H  | -0.562929 | -1.905455 | -1.270822 |
| H  | -1.524495 | -0.701430 | -2.161767 |
| Na | -0.283095 | 2.541783  | 0.000274  |
| H  | 3.773445  | -0.116646 | -0.868202 |
| H  | 3.392415  | -1.615852 | -0.011246 |
| H  | 3.759300  | -0.145330 | 0.900091  |

20

Figure 10 NaOtBu-Cu-Me (145 deg) / electronic energy: -2075.34278322 a.u. / lowest freq: -11.41 cm<sup>-1</sup>

|    |           |           |           |
|----|-----------|-----------|-----------|
| C  | 3.195215  | -0.262666 | -0.051898 |
| Cu | 1.263689  | -0.487463 | 0.029147  |
| H  | -1.831025 | -0.333351 | 2.159192  |
| H  | -2.689612 | 1.599521  | 0.724063  |
| C  | -1.906132 | -0.992334 | 1.279333  |
| H  | -2.890815 | -1.487800 | 1.299861  |
| H  | -1.127516 | -1.767434 | 1.373859  |
| C  | -2.748329 | 0.906532  | -0.132060 |
| H  | -3.769710 | 0.493818  | -0.163307 |
| O  | -0.423371 | 0.421053  | 0.035304  |
| C  | -1.675416 | -0.185382 | -0.007261 |
| H  | -2.590393 | 1.488072  | -1.055644 |
| C  | -1.757456 | -1.125594 | -1.219805 |
| H  | -2.738037 | -1.621777 | -1.308863 |
| H  | -0.981938 | -1.905746 | -1.138783 |
| H  | -1.569365 | -0.562837 | -2.148283 |

|    |          |           |           |
|----|----------|-----------|-----------|
| Na | 0.490811 | 2.309283  | 0.012562  |
| H  | 3.502156 | 0.307366  | -0.952765 |
| H  | 3.795164 | -1.195700 | -0.080440 |
| H  | 3.584856 | 0.308403  | 0.815381  |

20

Figure 10\_NaOtBu-Cu-Me\_(130 deg) / electronic energy: -2075.33621269 a.u. / lowest freq: 39.95 cm-1

|    |           |           |           |
|----|-----------|-----------|-----------|
| C  | 3.078089  | -0.114627 | 0.061990  |
| Cu | 1.187825  | -0.646941 | -0.031046 |
| H  | -1.756989 | 0.004668  | 2.184804  |
| H  | -2.562606 | 1.862453  | 0.644384  |
| C  | -1.931260 | -0.719798 | 1.372819  |
| H  | -2.945101 | -1.137046 | 1.491874  |
| H  | -1.203813 | -1.539946 | 1.495099  |
| C  | -2.716296 | 1.113910  | -0.150771 |
| H  | -3.764415 | 0.776105  | -0.099299 |
| O  | -0.423511 | 0.451462  | -0.071281 |
| C  | -1.718673 | -0.043176 | 0.008539  |
| H  | -2.566563 | 1.613147  | -1.122152 |
| C  | -1.947595 | -1.074677 | -1.107720 |
| H  | -2.961210 | -1.508135 | -1.089814 |
| H  | -1.217984 | -1.896228 | -1.004647 |
| H  | -1.786391 | -0.607058 | -2.092349 |
| Na | 0.964399  | 2.049368  | -0.027059 |
| H  | 3.377518  | 0.537870  | -0.786355 |
| H  | 3.826453  | -0.932510 | 0.055377  |
| H  | 3.308296  | 0.463444  | 0.982176  |

20

Figure 10\_NaOtBu-Cu-Me\_(115 deg) / electronic energy: -2075.32884553 a.u. / lowest freq: -9.37 cm-1

|    |           |           |           |
|----|-----------|-----------|-----------|
| C  | 2.967293  | 0.132829  | -0.000767 |
| Cu | 1.192350  | -0.780537 | 0.000271  |
| H  | -1.778825 | -0.255234 | 2.162147  |
| H  | -2.475729 | 1.835265  | 0.891198  |
| C  | -1.963858 | -0.849723 | 1.252903  |
| H  | -2.991152 | -1.247818 | 1.301812  |
| H  | -1.262066 | -1.701570 | 1.264195  |
| C  | -2.656724 | 1.212470  | -0.000374 |
| H  | -3.719583 | 0.918651  | 0.000204  |
| O  | -0.394071 | 0.448667  | -0.001628 |
| C  | -1.706469 | 0.004698  | -0.000128 |
| H  | -2.476368 | 1.834309  | -0.892732 |
| C  | -1.965784 | -0.851662 | -1.251428 |
| H  | -2.993071 | -1.250048 | -1.298076 |
| H  | -1.263826 | -1.703369 | -1.262586 |
| H  | -1.782306 | -0.258466 | -2.161825 |
| Na | 1.015181  | 1.993192  | 0.000270  |
| H  | 3.116662  | 0.783457  | -0.891541 |
| H  | 3.869331  | -0.510426 | -0.000766 |
| H  | 3.117603  | 0.784698  | 0.888933  |

41

Figure 10\_NaOtBu\_ts(SN2')\_01 / electronic energy: -2914.15039392 a.u. / lowest freq: -228.67 cm-1

|    |           |           |           |
|----|-----------|-----------|-----------|
| C  | -0.133094 | 1.641930  | 0.888602  |
| C  | -0.109601 | 0.311855  | 1.410961  |
| C  | -0.394483 | -0.775481 | 0.594068  |
| O  | -2.474046 | -1.200585 | 0.654651  |
| P  | -3.206729 | -0.242235 | -0.276157 |
| O  | -2.458145 | 0.566270  | -1.290113 |
| O  | -4.375642 | -1.068664 | -1.070636 |
| O  | -4.092757 | 0.717543  | 0.715289  |
| C  | -5.205559 | -1.951004 | -0.351809 |
| H  | -0.038295 | 2.483054  | 1.580733  |
| H  | -0.742875 | 1.824144  | -0.004812 |
| H  | 0.123875  | 0.139860  | 2.465948  |
| H  | -0.529283 | -0.628906 | -0.478302 |
| H  | -0.219160 | -1.791042 | 0.946132  |
| C  | 2.067390  | 2.723518  | -0.431623 |
| Cu | 1.553396  | 0.927315  | 0.244784  |
| H  | -5.948589 | -2.361446 | -1.051201 |
| H  | -5.740163 | -1.435195 | 0.465012  |
| H  | -4.630018 | -2.783875 | 0.084911  |
| C  | -4.867026 | 1.745031  | 0.142700  |
| H  | -5.396342 | 2.263655  | 0.955414  |
| H  | -5.615969 | 1.348019  | -0.565108 |
| H  | -4.239205 | 2.473617  | -0.396528 |
| H  | 2.726718  | -2.093093 | -1.960110 |
| H  | 5.078024  | -1.450532 | -1.360188 |
| C  | 2.523054  | -2.331177 | -0.903870 |
| H  | 2.714929  | -3.404980 | -0.748498 |
| H  | 1.454263  | -2.146269 | -0.720404 |
| C  | 4.865737  | -1.688200 | -0.302923 |
| H  | 5.166514  | -2.734591 | -0.136851 |
| O  | 3.105578  | -0.099001 | -0.224531 |
| C  | 3.380036  | -1.449696 | 0.012823  |
| H  | 5.501491  | -1.053057 | 0.337842  |
| C  | 3.116431  | -1.805802 | 1.481502  |
| H  | 3.362172  | -2.856439 | 1.704432  |
| H  | 2.056270  | -1.645041 | 1.728422  |
| H  | 3.719942  | -1.161031 | 2.140476  |
| Na | 4.415903  | 1.335318  | -1.064931 |
| H  | 2.967944  | 3.070536  | 0.111648  |
| H  | 1.324567  | 3.529154  | -0.348381 |
| H  | 2.283518  | 2.616014  | -1.512574 |

41

Figure 10\_NaOtBu\_ts(SN2')\_02 / electronic energy: -2914.15050466 a.u. / lowest freq: -245.56 cm-1

|   |          |           |           |
|---|----------|-----------|-----------|
| C | 0.204603 | 1.632068  | -0.753728 |
| C | 0.153844 | 0.335556  | -1.351030 |
| C | 0.395826 | -0.805753 | -0.594310 |
| O | 2.456431 | -1.277184 | -0.638687 |

|    |           |           |           |
|----|-----------|-----------|-----------|
| P  | 3.188157  | -0.303001 | 0.279269  |
| O  | 2.461707  | 0.407061  | 1.379004  |
| O  | 4.465421  | -1.153260 | 0.847306  |
| O  | 3.921145  | 0.842875  | -0.634660 |
| C  | 5.328178  | -0.532068 | 1.772580  |
| H  | 0.156540  | 2.513698  | -1.398536 |
| H  | 0.787815  | 1.746173  | 0.168156  |
| H  | -0.059717 | 0.230092  | -2.419017 |
| H  | 0.508840  | -0.727398 | 0.487711  |
| H  | 0.201258  | -1.793813 | -1.008910 |
| C  | -2.020936 | 2.715909  | 0.531567  |
| Cu | -1.521390 | 0.934825  | -0.195478 |
| H  | 6.099247  | -1.261901 | 2.057900  |
| H  | 4.786606  | -0.211756 | 2.677980  |
| H  | 5.826000  | 0.352219  | 1.337417  |
| C  | 4.638695  | 0.450886  | -1.781178 |
| H  | 4.942285  | 1.359954  | -2.320543 |
| H  | 4.020361  | -0.172501 | -2.447800 |
| H  | 5.547170  | -0.119646 | -1.518758 |
| H  | -2.762672 | -2.085972 | 1.923447  |
| H  | -5.099953 | -1.420456 | 1.303610  |
| C  | -2.551009 | -2.320267 | 0.867888  |
| H  | -2.753836 | -3.390795 | 0.704098  |
| H  | -1.478264 | -2.147410 | 0.696988  |
| C  | -4.879210 | -1.648619 | 0.245898  |
| H  | -5.188901 | -2.690110 | 0.065918  |
| O  | -3.102308 | -0.076676 | 0.200321  |
| C  | -3.387841 | -1.422337 | -0.051586 |
| H  | -5.502186 | -1.000349 | -0.394224 |
| C  | -3.111027 | -1.768561 | -1.520064 |
| H  | -3.356285 | -2.817217 | -1.752729 |
| H  | -2.048195 | -1.607477 | -1.754776 |
| H  | -3.706730 | -1.118101 | -2.180431 |
| Na | -4.403268 | 1.349697  | 1.068951  |
| H  | -2.900733 | 3.095935  | -0.023507 |
| H  | -1.263051 | 3.510702  | 0.492083  |
| H  | -2.267585 | 2.581144  | 1.602816  |

41

Figure 10\_NaOtBu\_ts(SN2')\_03 / electronic energy: -2914.14886171 a.u. / lowest freq: -234.18 cm-1

|    |           |           |           |
|----|-----------|-----------|-----------|
| C  | 0.175881  | -1.769436 | 0.698062  |
| C  | 0.107876  | -0.550200 | 1.440967  |
| C  | 0.401262  | 0.661994  | 0.831975  |
| O  | 2.486465  | 1.098685  | 1.046471  |
| P  | 3.271593  | 0.299934  | 0.015376  |
| O  | 2.546715  | -0.286730 | -1.165408 |
| O  | 4.546092  | 1.198761  | -0.494744 |
| O  | 4.095696  | -0.832859 | 0.843511  |
| C  | 4.313658  | 2.188905  | -1.466982 |
| H  | 0.064313  | -2.720239 | 1.226122  |
| H  | 0.825741  | -1.785684 | -0.185677 |
| H  | -0.177014 | -0.564146 | 2.497387  |
| H  | 0.595034  | 0.699296  | -0.240810 |
| H  | 0.197164  | 1.602411  | 1.341970  |
| C  | -1.959255 | -2.639854 | -0.846824 |
| Cu | -1.491186 | -0.964070 | 0.109377  |
| H  | 5.268450  | 2.693479  | -1.674618 |
| H  | 3.592040  | 2.946328  | -1.112205 |
| H  | 3.928238  | 1.754997  | -2.405206 |
| C  | 4.909552  | -1.743015 | 0.139714  |
| H  | 5.145576  | -2.580049 | 0.812888  |
| H  | 5.854333  | -1.271880 | -0.180497 |
| H  | 4.395116  | -2.137035 | -0.752051 |
| H  | -2.601264 | 2.232369  | -1.734660 |
| H  | -4.984597 | 1.541560  | -1.284699 |
| C  | -2.441880 | 2.374937  | -0.653976 |
| H  | -2.644458 | 3.430401  | -0.410854 |
| H  | -1.380548 | 2.174757  | -0.444795 |
| C  | -4.806393 | 1.690779  | -0.205261 |
| H  | -5.105172 | 2.722912  | 0.036494  |
| O  | -3.054568 | 0.090557  | -0.223998 |
| C  | -3.333714 | 1.412118  | 0.139299  |
| H  | -5.468759 | 1.013098  | 0.360855  |
| C  | -3.125909 | 1.614695  | 1.645236  |
| H  | -3.374076 | 2.639554  | 1.964544  |
| H  | -2.077983 | 1.418428  | 1.917118  |
| H  | -3.758367 | 0.913273  | 2.212849  |
| Na | -4.391408 | -1.269594 | -1.142919 |
| H  | -2.820684 | -3.119210 | -0.342128 |
| H  | -1.181445 | -3.412008 | -0.927302 |
| H  | -2.225324 | -2.360904 | -1.885114 |

41

Figure 10\_NaOtBu\_ts(SN2')\_04 / electronic energy: -2914.14810523 a.u. / lowest freq: -261.78 cm-1

|   |           |           |           |
|---|-----------|-----------|-----------|
| C | 0.157622  | 1.766949  | -0.675694 |
| C | 0.189061  | 0.493544  | -1.321172 |
| C | 0.477803  | -0.660162 | -0.598361 |
| O | 2.556118  | -0.983744 | -0.570752 |
| P | 3.173712  | -0.052668 | 0.478806  |
| O | 2.323589  | 0.513579  | 1.568787  |
| O | 4.465981  | -0.832276 | 1.111936  |
| O | 3.885390  | 1.207581  | -0.281050 |
| C | 4.914832  | -2.071372 | 0.614054  |
| H | 0.068330  | 2.670269  | -1.285162 |
| H | 0.714190  | 1.877471  | 0.262826  |
| H | 0.007557  | 0.416835  | -2.397484 |
| H | 0.547394  | -0.617080 | 0.489410  |
| H | 0.351765  | -1.640602 | -1.056177 |
| C | -2.131353 | 2.666629  | 0.632167  |

|    |           |           |           |
|----|-----------|-----------|-----------|
| Cu | -1.533623 | 0.951766  | -0.178454 |
| H  | 5.711096  | -2.427090 | 1.284483  |
| H  | 5.332441  | -1.987028 | -0.403738 |
| H  | 4.111112  | -2.824103 | 0.592217  |
| C  | 4.817564  | 0.963450  | -1.305615 |
| H  | 5.016654  | 1.914827  | -1.820240 |
| H  | 4.430687  | 0.239887  | -2.043312 |
| H  | 5.772061  | 0.582299  | -0.901595 |
| H  | -2.644439 | -2.174810 | 1.813851  |
| H  | -5.015189 | -1.614605 | 1.166558  |
| C  | -2.416210 | -2.384572 | 0.756635  |
| H  | -2.578900 | -3.458966 | 0.574211  |
| H  | -1.349029 | -2.170705 | 0.597380  |
| C  | -4.763740 | -1.812334 | 0.109486  |
| H  | -5.015905 | -2.864864 | -0.094861 |
| O  | -3.068405 | -0.153405 | 0.136605  |
| C  | -3.280304 | -1.504107 | -0.154818 |
| H  | -5.406849 | -1.184784 | -0.531379 |
| C  | -2.961260 | -1.797363 | -1.626110 |
| H  | -3.157499 | -2.848574 | -1.891478 |
| H  | -1.902048 | -1.584801 | -1.836006 |
| H  | -3.572186 | -1.154674 | -2.280217 |
| Na | -4.460361 | 1.187792  | 1.001849  |
| H  | -3.013878 | 3.046188  | 0.080699  |
| H  | -1.405631 | 3.491504  | 0.656964  |
| H  | -2.393844 | 2.458666  | 1.688153  |

41

Figure 10\_NaOtBu\_ts(SN2)\_01 / electronic energy: -2914.14526307 a.u. / lowest freq: -335.11 cm<sup>-1</sup>

|    |           |           |           |
|----|-----------|-----------|-----------|
| C  | -0.732684 | -1.213624 | -0.880529 |
| C  | -0.264324 | -0.058796 | -1.562968 |
| C  | 0.190900  | 1.043628  | -0.854185 |
| O  | -2.832123 | -0.973348 | -0.865731 |
| P  | -3.198401 | -0.057021 | 0.298439  |
| O  | -2.229970 | 0.172855  | 1.416603  |
| O  | -3.625247 | 1.410034  | -0.290956 |
| O  | -4.630434 | -0.633961 | 0.840038  |
| C  | -4.450852 | 1.477387  | -1.429892 |
| H  | -0.878866 | -2.150013 | -1.411944 |
| H  | -0.799534 | -1.215580 | 0.207863  |
| H  | -0.188981 | -0.093928 | -2.654183 |
| H  | -0.119027 | 1.175111  | 0.188498  |
| H  | 0.564670  | 1.923021  | -1.383340 |
| C  | 1.795388  | -2.603076 | -0.645151 |
| Cu | 1.448961  | -0.619260 | -0.589894 |
| H  | -4.638809 | 2.538500  | -1.649056 |
| H  | -5.421696 | 0.979031  | -1.261944 |
| H  | -3.970968 | 1.010210  | -2.305453 |
| C  | -5.236378 | -0.005429 | 1.946438  |
| H  | -6.194265 | -0.509747 | 2.139062  |
| H  | -5.437254 | 1.062136  | 1.749816  |
| H  | -4.606864 | -0.077816 | 2.848823  |
| H  | 2.683468  | 1.915352  | 2.151859  |
| H  | 4.897334  | 0.672365  | 2.074589  |
| C  | 2.865125  | 2.252651  | 1.118798  |
| H  | 3.396203  | 3.217343  | 1.160468  |
| H  | 1.887953  | 2.423751  | 0.644942  |
| C  | 5.029559  | 0.998131  | 1.028129  |
| H  | 5.624512  | 1.925208  | 1.044825  |
| O  | 3.005170  | -0.041606 | 0.379657  |
| C  | 3.662370  | 1.190441  | 0.350484  |
| H  | 5.614910  | 0.230512  | 0.494618  |
| C  | 3.879460  | 1.643872  | -1.099228 |
| H  | 4.437544  | 2.592001  | -1.162000 |
| H  | 2.909531  | 1.785771  | -1.601557 |
| H  | 4.438954  | 0.874354  | -1.654923 |
| Na | 3.467846  | -1.841269 | 1.395093  |
| H  | 1.291848  | -3.149399 | -1.458682 |
| H  | 1.509394  | -3.135643 | 0.284258  |
| H  | 2.879222  | -2.747612 | -0.830491 |

41

Figure 10\_NaOtBu\_ts(SN2)\_02 / electronic energy: -2914.14552014 a.u. / lowest freq: -358.84 cm<sup>-1</sup>

|    |           |           |           |
|----|-----------|-----------|-----------|
| C  | -0.757372 | -1.334434 | -0.646208 |
| C  | -0.288972 | -0.305406 | -1.507229 |
| C  | 0.173805  | 0.892643  | -0.984462 |
| O  | -2.844563 | -1.086815 | -0.642155 |
| P  | -3.205192 | 0.041156  | 0.320711  |
| O  | -2.216331 | 0.511992  | 1.340559  |
| O  | -3.710440 | 1.268807  | -0.638576 |
| O  | -4.579915 | -0.360720 | 1.109013  |
| C  | -4.044002 | 2.498247  | -0.036990 |
| H  | -0.913423 | -2.341325 | -1.022726 |
| H  | -0.802319 | -1.167762 | 0.430250  |
| H  | -0.224626 | -0.512710 | -2.579697 |
| H  | -0.131401 | 1.186625  | 0.025850  |
| H  | 0.549072  | 1.673346  | -1.649953 |
| C  | 1.764032  | -2.703551 | -0.266289 |
| Cu | 1.431881  | -0.727215 | -0.475289 |
| H  | -4.383736 | 3.182790  | -0.827728 |
| H  | -3.176659 | 2.947584  | 0.474190  |
| H  | -4.858226 | 2.386884  | 0.700412  |
| C  | -5.672410 | -0.874819 | 0.382329  |
| H  | -6.476039 | -1.102759 | 1.097238  |
| H  | -5.401497 | -1.798132 | -0.155780 |
| H  | -6.053075 | -0.144271 | -0.352605 |
| H  | 2.678474  | 2.083731  | 1.891189  |
| H  | 4.922115  | 0.904300  | 1.915997  |
| C  | 2.845901  | 2.322028  | 0.828626  |



|    |          |           |           |
|----|----------|-----------|-----------|
| H  | 3.356804 | 3.296587  | 0.770106  |
| H  | 1.862170 | 2.427829  | 0.349544  |
| C  | 5.037577 | 1.118075  | 0.839075  |
| H  | 5.609445 | 2.055221  | 0.749267  |
| O  | 3.035640 | -0.031814 | 0.320326  |
| C  | 3.660076 | 1.207056  | 0.160077  |
| H  | 5.637467 | 0.313007  | 0.381809  |
| C  | 3.854150 | 1.515730  | -1.329963 |
| H  | 4.379449 | 2.470390  | -1.493954 |
| H  | 2.877977 | 1.573048  | -1.836478 |
| H  | 4.436229 | 0.712083  | -1.808759 |
| Na | 3.652147 | -1.705538 | 1.460193  |
| H  | 1.178247 | -3.368259 | -0.920446 |
| H  | 1.578848 | -3.074415 | 0.762544  |
| H  | 2.822576 | -2.896011 | -0.536808 |

41

Figure 10\_NaOtBu\_ts(SN2)\_03 / electronic energy: -2914.14400540 a.u. / lowest freq: -344.79 cm<sup>-1</sup>

|    |           |           |           |
|----|-----------|-----------|-----------|
| C  | -0.834209 | -1.009869 | -0.954730 |
| C  | -0.349902 | 0.239919  | -1.423615 |
| C  | 0.140810  | 1.181885  | -0.533632 |
| O  | -2.943841 | -0.709672 | -0.831634 |
| P  | -3.220430 | 0.130474  | 0.419753  |
| O  | -2.257679 | 0.055714  | 1.563798  |
| O  | -3.407053 | 1.690129  | -0.000598 |
| O  | -4.759985 | -0.180375 | 0.885176  |
| C  | -4.184879 | 2.029576  | -1.125056 |
| H  | -1.027094 | -1.824778 | -1.646859 |
| H  | -0.895084 | -1.207036 | 0.116202  |
| H  | -0.292763 | 0.406352  | -2.503692 |
| H  | -0.142333 | 1.120117  | 0.522756  |
| H  | 0.526854  | 2.135754  | -0.899573 |
| C  | 1.656995  | -2.490366 | -1.024534 |
| Cu | 1.368091  | -0.541914 | -0.610415 |
| H  | -4.016789 | 3.094108  | -1.343305 |
| H  | -5.260156 | 1.875122  | -0.932482 |
| H  | -3.899424 | 1.433453  | -2.007425 |
| C  | -5.092086 | -1.495154 | 1.263144  |
| H  | -6.170352 | -1.527133 | 1.476302  |
| H  | -4.546285 | -1.805320 | 2.171354  |
| H  | -4.869663 | -2.216472 | 0.458248  |
| H  | 2.826799  | 1.464703  | 2.425043  |
| H  | 5.001629  | 0.251992  | 1.994107  |
| C  | 2.936720  | 1.973164  | 1.453918  |
| H  | 3.470374  | 2.922753  | 1.620179  |
| H  | 1.929055  | 2.211922  | 1.085673  |
| C  | 5.077147  | 0.756821  | 1.015377  |
| H  | 5.678192  | 1.668573  | 1.159879  |
| O  | 3.006891  | -0.154989 | 0.316031  |
| C  | 3.674696  | 1.063395  | 0.463633  |
| H  | 5.627374  | 0.098893  | 0.321245  |
| C  | 3.813447  | 1.761980  | -0.895390 |
| H  | 4.363938  | 2.713671  | -0.822148 |
| H  | 2.819186  | 1.975575  | -1.318020 |
| H  | 4.347002  | 1.107273  | -1.602911 |
| Na | 3.616672  | -2.104170 | 0.870856  |
| H  | 1.036711  | -2.927797 | -1.822173 |
| H  | 1.500276  | -3.144431 | -0.142719 |
| H  | 2.701881  | -2.597584 | -1.380211 |

41

Figure 10\_NaOtBu\_ts(SN2)\_04 / electronic energy: -2914.14390216 a.u. / lowest freq: -336.71 cm<sup>-1</sup>

|    |           |           |           |
|----|-----------|-----------|-----------|
| C  | -0.777866 | -1.131968 | -1.018650 |
| C  | -0.228421 | -0.013683 | -1.701733 |
| C  | 0.229140  | 1.086673  | -0.992859 |
| O  | -2.865703 | -0.800589 | -1.098259 |
| P  | -3.264471 | 0.102769  | 0.064300  |
| O  | -2.286508 | 0.305988  | 1.188959  |
| O  | -3.742359 | 1.509906  | -0.591801 |
| O  | -4.711571 | -0.397830 | 0.648190  |
| C  | -4.128317 | 2.567570  | 0.257242  |
| H  | -0.935849 | -2.073700 | -1.537315 |
| H  | -0.904263 | -1.101206 | 0.063991  |
| H  | -0.092111 | -0.079105 | -2.785505 |
| H  | -0.132843 | 1.251291  | 0.028298  |
| H  | 0.671034  | 1.937089  | -1.516792 |
| C  | 1.660920  | -2.625846 | -0.579323 |
| Cu | 1.396451  | -0.628747 | -0.603822 |
| H  | -4.172166 | 3.487956  | -0.342882 |
| H  | -3.403251 | 2.710369  | 1.075231  |
| H  | -5.123413 | 2.387139  | 0.698210  |
| C  | -4.734208 | -1.546309 | 1.461890  |
| H  | -5.783266 | -1.772482 | 1.701570  |
| H  | -4.181387 | -1.389554 | 2.403645  |
| H  | -4.301472 | -2.420564 | 0.944129  |
| H  | 2.659510  | 1.955818  | 2.115723  |
| H  | 4.797900  | 0.602836  | 2.155066  |
| C  | 2.877635  | 2.238449  | 1.073282  |
| H  | 3.443915  | 3.183902  | 1.085352  |
| H  | 1.917992  | 2.423272  | 0.569314  |
| C  | 4.980813  | 0.878360  | 1.101756  |
| H  | 5.625193  | 1.772093  | 1.102402  |
| O  | 2.929938  | -0.083849 | 0.420623  |
| C  | 3.648063  | 1.112828  | 0.370902  |
| H  | 5.540186  | 0.060111  | 0.617613  |
| C  | 3.935455  | 1.501203  | -1.085623 |
| H  | 4.536491  | 2.421637  | -1.162813 |
| H  | 2.990604  | 1.664759  | -1.627227 |
| H  | 4.478762  | 0.687615  | -1.592634 |

|    |          |           |           |
|----|----------|-----------|-----------|
| Na | 3.294391 | -1.870562 | 1.494277  |
| H  | 1.157222 | -3.186797 | -1.382583 |
| H  | 1.330428 | -3.108494 | 0.362722  |
| H  | 2.742813 | -2.818324 | -0.729218 |

41

Figure 10\_NaOtBu\_ts(SN2')\_chelate\_01 / electronic energy: -2914.16942813 a.u. / lowest freq: -376.99 cm-1

|    |           |           |           |
|----|-----------|-----------|-----------|
| C  | -0.898843 | 2.812291  | -0.598162 |
| C  | -0.256736 | 1.756285  | -1.294793 |
| C  | 0.422121  | 0.729934  | -0.614745 |
| O  | 2.335256  | 0.832044  | -0.608703 |
| P  | 2.965349  | -0.370449 | 0.121676  |
| O  | 2.026676  | -1.238263 | 0.920216  |
| O  | 3.752169  | -1.311234 | -0.917243 |
| O  | 4.199991  | 0.180356  | 1.007598  |
| C  | 4.672743  | -0.752335 | -1.840011 |
| H  | -1.436400 | 3.577319  | -1.164848 |
| H  | -0.506538 | 3.148650  | 0.368795  |
| H  | -0.423454 | 1.642656  | -2.370170 |
| H  | 0.412287  | 0.759975  | 0.476055  |
| H  | 0.442314  | -0.247572 | -1.094318 |
| C  | -3.389316 | 2.200912  | 0.783950  |
| Cu | -1.921811 | 1.205036  | -0.081306 |
| H  | 4.230920  | 0.105398  | -2.370765 |
| H  | 4.926027  | -1.533789 | -2.568262 |
| H  | 5.592766  | -0.425880 | -1.330219 |
| C  | 3.975177  | 1.207315  | 1.957023  |
| H  | 4.931013  | 1.408283  | 2.458466  |
| H  | 3.237802  | 0.896471  | 2.715103  |
| H  | 3.622789  | 2.130039  | 1.469563  |
| H  | -2.681735 | -1.266533 | -2.205633 |
| H  | -1.732599 | -3.144875 | -0.736916 |
| C  | -3.511323 | -1.163832 | -1.487412 |
| H  | -4.343077 | -1.803956 | -1.823790 |
| H  | -3.857609 | -0.116792 | -1.515509 |
| C  | -2.579787 | -2.988730 | -0.046670 |
| H  | -3.382352 | -3.680252 | -0.347499 |
| O  | -1.939095 | -0.718296 | 0.276297  |
| C  | -3.029723 | -1.517162 | -0.072138 |
| H  | -2.271552 | -3.284590 | 0.972500  |
| C  | -4.180872 | -1.329933 | 0.927566  |
| H  | -5.030706 | -1.998252 | 0.712202  |
| H  | -4.546834 | -0.293127 | 0.902380  |
| H  | -3.828784 | -1.538599 | 1.950720  |
| Na | -0.121379 | -1.681379 | 1.038767  |
| H  | -3.255233 | 3.287707  | 0.909917  |
| H  | -3.537442 | 1.756291  | 1.784030  |
| H  | -4.314773 | 2.041960  | 0.201509  |

41

Figure 10\_NaOtBu\_ts(SN2')\_chelate\_02 / electronic energy: -2914.16958209 a.u. / lowest freq: -387.04 cm-1

|    |           |           |           |
|----|-----------|-----------|-----------|
| C  | -0.896930 | 2.729544  | -0.745099 |
| C  | -0.325434 | 1.612074  | -1.406465 |
| C  | 0.365147  | 0.613514  | -0.695716 |
| O  | 2.272996  | 0.676378  | -0.780429 |
| P  | 2.928135  | -0.370722 | 0.142671  |
| O  | 1.997635  | -1.175611 | 1.013297  |
| O  | 3.824797  | -1.394279 | -0.711766 |
| O  | 4.077611  | 0.378848  | 0.999609  |
| C  | 4.774361  | -0.909900 | -1.647035 |
| H  | -1.447650 | 3.473044  | -1.327700 |
| H  | -0.436910 | 3.114441  | 0.172661  |
| H  | -0.555005 | 1.435159  | -2.461435 |
| H  | 0.405690  | 0.717527  | 0.388890  |
| H  | 0.344670  | -0.397161 | -1.100611 |
| C  | -3.357151 | 2.261319  | 0.780168  |
| Cu | -1.927033 | 1.194240  | -0.055309 |
| H  | 4.312356  | -0.205324 | -2.356306 |
| H  | 5.160603  | -1.775440 | -2.200925 |
| H  | 5.611897  | -0.408959 | -1.136406 |
| C  | 3.766397  | 1.576557  | 1.688375  |
| H  | 4.687590  | 1.931509  | 2.168888  |
| H  | 3.006396  | 1.405760  | 2.469132  |
| H  | 3.400244  | 2.349214  | 0.994193  |
| H  | -2.125569 | -1.432111 | -2.103515 |
| H  | -1.558582 | -3.205321 | -0.372493 |
| C  | -3.093375 | -1.286467 | -1.596799 |
| H  | -3.833565 | -1.954802 | -2.065960 |
| H  | -3.416867 | -0.246191 | -1.775300 |
| C  | -2.515459 | -2.997797 | 0.139147  |
| H  | -3.252018 | -3.719962 | -0.246771 |
| O  | -1.965677 | -0.700134 | 0.446575  |
| C  | -2.945659 | -1.537936 | -0.087578 |
| H  | -2.395051 | -3.200962 | 1.217960  |
| C  | -4.295145 | -1.298154 | 0.605086  |
| H  | -5.077437 | -1.984331 | 0.241413  |
| H  | -4.635713 | -0.266638 | 0.429405  |
| H  | -4.190140 | -1.437850 | 1.692730  |
| Na | -0.141505 | -1.586318 | 1.279189  |
| H  | -3.118207 | 3.308654  | 1.029267  |
| H  | -3.668772 | 1.745449  | 1.705116  |
| H  | -4.218879 | 2.273541  | 0.087787  |

41

Figure 10\_NaOtBu\_ts(SN2')\_chelate\_03 / electronic energy: -2914.17005408 a.u. / lowest freq: -394.05 cm-1

|   |           |           |           |
|---|-----------|-----------|-----------|
| C | -1.057672 | 2.830908  | -0.366436 |
| C | -0.480719 | 1.833566  | -1.193824 |
| C | 0.276337  | 0.777518  | -0.648620 |
| O | 2.157996  | 0.931923  | -0.786648 |
| P | 2.873155  | -0.176807 | -0.000220 |

|    |           |           |           |
|----|-----------|-----------|-----------|
| O  | 2.031556  | -1.261276 | 0.622313  |
| O  | 3.966544  | -0.892802 | -0.950160 |
| O  | 3.760497  | 0.596254  | 1.109371  |
| C  | 4.849524  | -0.100882 | -1.728498 |
| H  | -1.666310 | 3.617669  | -0.820714 |
| H  | -0.566448 | 3.113778  | 0.571557  |
| H  | -0.744316 | 1.789299  | -2.254699 |
| H  | 0.336872  | 0.728228  | 0.439818  |
| H  | 0.274594  | -0.167512 | -1.189532 |
| C  | -3.375359 | 2.041347  | 1.256238  |
| Cu | -1.997305 | 1.173123  | 0.146612  |
| H  | 4.290815  | 0.547487  | -2.421005 |
| H  | 5.483801  | -0.784910 | -2.307474 |
| H  | 5.491601  | 0.528819  | -1.090968 |
| C  | 4.548063  | -0.153215 | 2.019371  |
| H  | 5.116797  | 0.559883  | 2.630637  |
| H  | 5.257132  | -0.811108 | 1.490786  |
| H  | 3.917135  | -0.769298 | 2.679261  |
| H  | -2.283270 | -1.035261 | -2.272701 |
| H  | -1.559599 | -3.068571 | -0.937719 |
| C  | -3.218352 | -1.012919 | -1.690008 |
| H  | -3.976212 | -1.602859 | -2.230770 |
| H  | -3.571243 | 0.032742  | -1.650212 |
| C  | -2.490243 | -2.996648 | -0.346862 |
| H  | -3.230244 | -3.657193 | -0.825408 |
| O  | -1.974830 | -0.779245 | 0.357210  |
| C  | -2.967728 | -1.536376 | -0.266432 |
| H  | -2.303718 | -3.398871 | 0.664504  |
| C  | -4.273281 | -1.476280 | 0.540552  |
| H  | -5.065953 | -2.102862 | 0.099882  |
| H  | -4.643108 | -0.440753 | 0.590185  |
| H  | -4.094390 | -1.818961 | 1.572225  |
| Na | -0.092201 | -1.743267 | 0.938092  |
| H  | -3.138719 | 3.044943  | 1.647175  |
| H  | -3.578426 | 1.375090  | 2.113044  |
| H  | -4.305593 | 2.126769  | 0.665088  |

41

Figure 10\_NaOtBu\_ts(SN2')\_chelate\_04 / electronic energy: -2914.17005409 a.u. / lowest freq: -394.05 cm<sup>-1</sup>

|    |           |           |           |
|----|-----------|-----------|-----------|
| C  | -1.057675 | -2.830911 | 0.366431  |
| C  | -0.480721 | -1.833570 | 1.193819  |
| C  | 0.276336  | -0.777523 | 0.648617  |
| O  | 2.157997  | -0.931925 | 0.786648  |
| P  | 2.873155  | 0.176808  | 0.000222  |
| O  | 2.031555  | 1.261281  | -0.622303 |
| O  | 3.966548  | 0.892798  | 0.950162  |
| O  | 3.760491  | -0.596251 | -1.109375 |
| C  | 4.849530  | 0.100874  | 1.728494  |
| H  | -1.666314 | -3.617671 | 0.820708  |
| H  | -0.566453 | -3.113779 | -0.571563 |
| H  | -0.744317 | -1.789305 | 2.254695  |
| H  | 0.336873  | -0.728232 | -0.439821 |
| H  | 0.274594  | 0.167507  | 1.189530  |
| C  | -3.375365 | -2.041341 | -1.256238 |
| Cu | -1.997306 | -1.173122 | -0.146613 |
| H  | 4.290822  | -0.547499 | 2.420999  |
| H  | 5.483808  | 0.784898  | 2.307472  |
| H  | 5.491605  | -0.528825 | 1.090960  |
| C  | 4.548057  | 0.153219  | -2.019373 |
| H  | 5.116792  | -0.559876 | -2.630640 |
| H  | 5.257126  | 0.811112  | -1.490788 |
| H  | 3.917129  | 0.769304  | -2.679262 |
| H  | -2.283264 | 1.035260  | 2.272703  |
| H  | -1.559593 | 3.068571  | 0.937721  |
| C  | -3.218347 | 1.012921  | 1.690012  |
| H  | -3.976204 | 1.602863  | 2.230775  |
| H  | -3.571242 | -0.032739 | 1.650216  |
| C  | -2.490238 | 2.996649  | 0.346866  |
| H  | -3.230239 | 3.657195  | 0.825410  |
| O  | -1.974828 | 0.779246  | -0.357207 |
| C  | -2.967724 | 1.536378  | 0.266436  |
| H  | -2.303713 | 3.398871  | -0.664501 |
| C  | -4.273277 | 1.476282  | -0.540548 |
| H  | -5.065950 | 2.102864  | -0.099876 |
| H  | -4.643105 | 0.440756  | -0.590182 |
| H  | -4.094387 | 1.818965  | -1.572221 |
| Na | -0.092201 | 1.743266  | -0.938098 |
| H  | -3.138725 | -3.044936 | -1.647180 |
| H  | -3.578435 | -1.375080 | -2.113041 |
| H  | -4.305596 | -2.126766 | -0.665084 |

41

Figure 10\_NaOtBu\_ts(SN2')\_chelate\_05 / electronic energy: -2914.16875021 a.u. / lowest freq: -369.05 cm<sup>-1</sup>

|    |           |           |           |
|----|-----------|-----------|-----------|
| C  | -1.172153 | -2.808136 | 0.653399  |
| C  | -0.526574 | -1.766145 | 1.367148  |
| C  | 0.281014  | -0.820744 | 0.710962  |
| O  | 2.174151  | -1.037026 | 0.914188  |
| P  | 2.962265  | -0.076282 | 0.014741  |
| O  | 2.157933  | 0.976321  | -0.718639 |
| O  | 4.155618  | 0.608310  | 0.865329  |
| O  | 3.818509  | -0.991000 | -0.991535 |
| C  | 3.845629  | 1.602876  | 1.823469  |
| H  | -1.810893 | -3.512087 | 1.193639  |
| H  | -0.719356 | -3.206679 | -0.261929 |
| H  | -0.779201 | -1.594915 | 2.417844  |
| H  | 0.365412  | -0.915896 | -0.372910 |
| H  | 0.334095  | 0.179562  | 1.136708  |
| C  | -3.513974 | -2.072034 | -0.946303 |
| Cu | -2.037438 | -1.162312 | -0.009685 |

|    |           |           |           |
|----|-----------|-----------|-----------|
| H  | 3.455056  | 2.514690  | 1.343871  |
| H  | 4.773301  | 1.851171  | 2.356048  |
| H  | 3.107397  | 1.236865  | 2.556287  |
| C  | 4.706454  | -0.399240 | -1.925155 |
| H  | 4.998200  | -1.177638 | -2.642290 |
| H  | 5.609601  | -0.018650 | -1.423067 |
| H  | 4.222807  | 0.426414  | -2.470890 |
| H  | -2.188636 | 1.436537  | 2.081539  |
| H  | -1.320408 | 3.176553  | 0.449654  |
| C  | -3.121334 | 1.386321  | 1.496765  |
| H  | -3.836806 | 2.108450  | 1.923005  |
| H  | -3.547705 | 0.375912  | 1.621383  |
| C  | -2.250002 | 3.071577  | -0.137716 |
| H  | -2.946272 | 3.848854  | 0.214154  |
| O  | -1.883523 | 0.740380  | -0.460347 |
| C  | -2.827086 | 1.652952  | 0.012260  |
| H  | -2.030553 | 3.288570  | -1.198132 |
| C  | -4.128108 | 1.550867  | -0.797492 |
| H  | -4.878402 | 2.291466  | -0.475719 |
| H  | -4.567910 | 0.548108  | -0.687199 |
| H  | -3.920214 | 1.711227  | -1.867447 |
| Na | 0.061288  | 1.469883  | -1.167598 |
| H  | -3.390455 | -3.149277 | -1.145680 |
| H  | -3.660344 | -1.556299 | -1.911694 |
| H  | -4.435877 | -1.946016 | -0.349857 |

41

Figure 10\_NaOtBu\_ts(SN2')\_chelate\_06 / electronic energy: -2914.16875021 a.u. / lowest freq: -369.05 cm<sup>-1</sup>

|    |           |           |           |
|----|-----------|-----------|-----------|
| C  | -1.172156 | 2.808137  | -0.653399 |
| C  | -0.526577 | 1.766146  | -1.367147 |
| C  | 0.281012  | 0.820746  | -0.710962 |
| O  | 2.174150  | 1.037028  | -0.914189 |
| P  | 2.962264  | 0.076283  | -0.014742 |
| O  | 2.157932  | -0.976326 | 0.718631  |
| O  | 4.155623  | -0.608302 | -0.865327 |
| O  | 3.818501  | 0.991000  | 0.991541  |
| C  | 3.845642  | -1.602869 | -1.823470 |
| H  | -1.810898 | 3.512087  | -1.193638 |
| H  | -0.719360 | 3.206680  | 0.261929  |
| H  | -0.779204 | 1.594916  | -2.417843 |
| H  | 0.365410  | 0.915899  | 0.372911  |
| H  | 0.334094  | -0.179561 | -1.136707 |
| C  | -3.513977 | 2.072029  | 0.946304  |
| Cu | -2.037439 | 1.162311  | 0.009685  |
| H  | 3.455074  | -2.514686 | -1.343874 |
| H  | 4.773317  | -1.851157 | -2.356047 |
| H  | 3.107409  | -1.236862 | -2.556289 |
| C  | 4.706445  | 0.399239  | 1.925161  |
| H  | 4.998179  | 1.177633  | 2.642306  |
| H  | 5.609598  | 0.018661  | 1.423077  |
| H  | 4.222801  | -0.426425 | 2.470885  |
| H  | -2.188614 | -1.436554 | -2.081537 |
| H  | -1.320406 | -3.176562 | -0.449637 |
| C  | -3.121316 | -1.386330 | -1.496771 |
| H  | -3.836789 | -2.108459 | -1.923013 |
| H  | -3.547682 | -0.375921 | -1.621399 |
| C  | -2.250004 | -3.071578 | 0.137728  |
| H  | -2.946273 | -3.848857 | -0.214141 |
| O  | -1.883522 | -0.740381 | 0.460348  |
| C  | -2.827083 | -1.652954 | -0.012263 |
| H  | -2.030560 | -3.288564 | 1.198146  |
| C  | -4.128112 | -1.550861 | 0.797477  |
| H  | -4.878406 | -2.291459 | 0.475701  |
| H  | -4.567910 | -0.548100 | 0.687178  |
| H  | -3.920228 | -1.711218 | 1.867435  |
| Na | 0.061289  | -1.469882 | 1.167600  |
| H  | -3.390454 | 3.149270  | 1.145691  |
| H  | -3.660355 | 1.556287  | 1.911690  |
| H  | -4.435877 | 1.946022  | 0.349852  |

41

Figure 10\_NaOtBu\_ts(SN2)\_chelate\_01 / electronic energy: -2914.16222070 a.u. / lowest freq: -483.33 cm<sup>-1</sup>

|    |           |           |           |
|----|-----------|-----------|-----------|
| C  | 0.046666  | 1.813381  | 2.480662  |
| C  | -0.009687 | 1.011423  | 1.408180  |
| C  | 0.222636  | 1.492657  | 0.053696  |
| O  | 2.227549  | 1.250165  | -0.051063 |
| P  | 2.716352  | -0.181094 | -0.244801 |
| O  | 1.764508  | -1.216225 | -0.787407 |
| O  | 4.013897  | -0.183335 | -1.213228 |
| O  | 3.311954  | -0.639053 | 1.192657  |
| C  | 5.063890  | 0.739305  | -0.984731 |
| H  | -0.098836 | 1.416887  | 3.488545  |
| H  | 0.237812  | 2.886269  | 2.380943  |
| H  | -0.204763 | -0.057714 | 1.526682  |
| H  | 0.162569  | 0.843032  | -0.815021 |
| H  | 0.371953  | 2.553908  | -0.127469 |
| C  | -2.143516 | 3.124776  | -0.572567 |
| Cu | -2.022836 | 1.205096  | -0.419704 |
| H  | 4.707126  | 1.777508  | -1.071488 |
| H  | 5.833868  | 0.559095  | -1.746867 |
| H  | 5.513301  | 0.599670  | 0.012624  |
| C  | 3.837889  | -1.943005 | 1.349686  |
| H  | 4.343226  | -1.984041 | 2.324037  |
| H  | 4.571819  | -2.182780 | 0.562730  |
| H  | 3.040402  | -2.703109 | 1.331384  |
| H  | -4.220002 | -1.148783 | -1.820027 |
| H  | -2.776811 | -3.135403 | -1.105123 |
| C  | -4.398745 | -0.928589 | -0.755528 |
| H  | -5.323378 | -1.440696 | -0.443739 |

|    |           |           |           |
|----|-----------|-----------|-----------|
| H  | -4.563337 | 0.158493  | -0.660359 |
| C  | -2.973300 | -2.866868 | -0.052595 |
| H  | -3.853108 | -3.442645 | 0.274521  |
| O  | -2.032299 | -0.699689 | -0.378755 |
| C  | -3.182209 | -1.350184 | 0.082619  |
| H  | -2.121118 | -3.198828 | 0.566647  |
| C  | -3.427276 | -1.000814 | 1.557935  |
| H  | -4.315057 | -1.509609 | 1.967333  |
| H  | -3.575144 | 0.086441  | 1.670315  |
| H  | -2.554572 | -1.285194 | 2.167541  |
| Na | -0.284341 | -1.840653 | -0.937175 |
| H  | -1.887616 | 3.667084  | 0.355626  |
| H  | -3.205986 | 3.348348  | -0.798167 |
| H  | -1.540581 | 3.560493  | -1.390088 |

41

Figure 10\_NaOtBu\_ts(SN2)\_chelate\_02 / electronic energy: -2914.16232564 a.u. / lowest freq: -494.81 cm<sup>-1</sup>

|    |           |           |           |
|----|-----------|-----------|-----------|
| C  | 0.111537  | 1.774155  | 2.433287  |
| C  | 0.020953  | 0.960961  | 1.371463  |
| C  | 0.339325  | 1.390947  | 0.017320  |
| O  | 2.328379  | 1.002285  | 0.034889  |
| P  | 2.766746  | -0.430896 | -0.278881 |
| O  | 1.700810  | -1.406755 | -0.706400 |
| O  | 3.913674  | -0.433504 | -1.407756 |
| O  | 3.613704  | -0.991627 | 0.987124  |
| C  | 5.014382  | 0.453362  | -1.311013 |
| H  | -0.103027 | 1.410461  | 3.441300  |
| H  | 0.397449  | 2.824892  | 2.324988  |
| H  | -0.272728 | -0.084509 | 1.496977  |
| H  | 0.276412  | 0.719789  | -0.834308 |
| H  | 0.572669  | 2.433420  | -0.182350 |
| C  | -1.863836 | 3.148311  | -0.720292 |
| Cu | -1.899376 | 1.230582  | -0.518970 |
| H  | 4.676948  | 1.494474  | -1.188195 |
| H  | 5.586560  | 0.369785  | -2.244554 |
| H  | 5.667882  | 0.185990  | -0.465113 |
| C  | 3.085250  | -0.861773 | 2.292241  |
| H  | 3.836298  | -1.246442 | 2.995679  |
| H  | 2.160319  | -1.450338 | 2.414478  |
| H  | 2.870572  | 0.191762  | 2.533785  |
| H  | -4.254426 | -1.110586 | -1.802645 |
| H  | -2.912548 | -3.114076 | -0.950780 |
| C  | -4.419036 | -0.811520 | -0.755256 |
| H  | -5.363765 | -1.260794 | -0.408680 |
| H  | -4.535469 | 0.285630  | -0.733871 |
| C  | -3.079331 | -2.758968 | 0.081059  |
| H  | -3.977952 | -3.268987 | 0.461589  |
| O  | -2.043372 | -0.665734 | -0.399729 |
| C  | -3.219249 | -1.228625 | 0.108387  |
| H  | -2.231804 | -3.082920 | 0.710904  |
| C  | -3.441880 | -0.765908 | 1.556073  |
| H  | -4.353923 | -1.198361 | 1.998590  |
| H  | -3.533056 | 0.332726  | 1.592879  |
| H  | -2.584613 | -1.053051 | 2.185964  |
| Na | -0.366010 | -1.917891 | -0.937687 |
| H  | -1.587993 | 3.689643  | 0.202520  |
| H  | -2.904045 | 3.439502  | -0.971439 |
| H  | -1.217179 | 3.522371  | -1.534452 |

41

Figure 10\_NaOtBu\_ts(SN2)\_chelate\_03 / electronic energy: -2914.16068298 a.u. / lowest freq: -481.78 cm<sup>-1</sup>

|    |           |           |           |
|----|-----------|-----------|-----------|
| C  | -0.072475 | 1.980003  | 2.489954  |
| C  | -0.068055 | 1.123402  | 1.459210  |
| C  | 0.202727  | 1.544144  | 0.091685  |
| O  | 2.226701  | 1.377201  | 0.089244  |
| P  | 2.786853  | -0.034706 | -0.034395 |
| O  | 1.903256  | -1.088505 | -0.668147 |
| O  | 4.217009  | 0.021185  | -0.794888 |
| O  | 3.270066  | -0.484427 | 1.435541  |
| C  | 4.246000  | 0.200992  | -2.197833 |
| H  | -0.247201 | 1.633053  | 3.511356  |
| H  | 0.098962  | 3.050506  | 2.341497  |
| H  | -0.243492 | 0.056786  | 1.623419  |
| H  | 0.213831  | 0.848247  | -0.742703 |
| H  | 0.330056  | 2.599288  | -0.134996 |
| C  | -2.186919 | 3.064120  | -0.641660 |
| Cu | -1.995289 | 1.154536  | -0.449995 |
| H  | 3.798311  | -0.658793 | -2.721983 |
| H  | 5.298053  | 0.293954  | -2.498995 |
| H  | 3.712731  | 1.119016  | -2.496104 |
| C  | 3.791375  | -1.783697 | 1.644419  |
| H  | 4.187029  | -1.820741 | 2.668366  |
| H  | 4.610022  | -2.007017 | 0.941779  |
| H  | 3.009389  | -2.553054 | 1.538935  |
| H  | -4.024812 | -1.248769 | -1.909489 |
| H  | -2.566755 | -3.199200 | -1.143236 |
| C  | -4.259789 | -1.039345 | -0.853699 |
| H  | -5.187291 | -1.573544 | -0.591162 |
| H  | -4.452719 | 0.043368  | -0.760508 |
| C  | -2.820583 | -2.947672 | -0.098817 |
| H  | -3.698793 | -3.550866 | 0.180102  |
| O  | -1.923015 | -0.751890 | -0.352275 |
| C  | -3.077000 | -1.438866 | 0.041290  |
| H  | -1.990470 | -3.263975 | 0.557594  |
| C  | -3.406117 | -1.112436 | 1.505370  |
| H  | -4.305109 | -1.641811 | 1.860590  |
| H  | -3.578623 | -0.029362 | 1.621624  |
| H  | -2.562507 | -1.389750 | 2.157605  |
| Na | -0.107122 | -1.834853 | -0.790194 |

|   |           |          |           |
|---|-----------|----------|-----------|
| H | -1.966066 | 3.629459 | 0.281628  |
| H | -3.253731 | 3.243409 | -0.885339 |
| H | -1.588983 | 3.509835 | -1.457376 |

41

Figure 10 NaOtBu\_ts(SN2)\_chelate\_04 / electronic energy: -2914.16231279 a.u. / lowest freq: -469.13 cm-1

|    |           |           |           |
|----|-----------|-----------|-----------|
| C  | -0.007558 | -2.229703 | 2.308588  |
| C  | 0.098439  | -2.566992 | 1.016047  |
| C  | 0.008269  | -1.582873 | -0.047139 |
| O  | -2.049968 | -1.445741 | -0.229074 |
| P  | -2.456067 | 0.004462  | -0.450443 |
| O  | -1.851631 | 0.794685  | -1.582505 |
| O  | -4.063021 | 0.096282  | -0.598294 |
| O  | -2.146820 | 0.752666  | 0.967044  |
| C  | -4.890052 | -0.628828 | 0.295568  |
| H  | 0.030077  | -2.986291 | 3.096474  |
| H  | -0.152348 | -1.188676 | 2.612302  |
| H  | 0.220208  | -3.612649 | 0.722425  |
| H  | 0.055561  | -0.524953 | 0.202954  |
| H  | 0.002637  | -1.888518 | -1.089046 |
| C  | 2.761345  | -2.835110 | -0.716559 |
| Cu | 2.209692  | -0.995419 | -0.531182 |
| H  | -4.751797 | -1.713874 | 0.171386  |
| H  | -5.932273 | -0.369912 | 0.065788  |
| H  | -4.680173 | -0.363322 | 1.344759  |
| C  | -2.336841 | 2.148411  | 1.079563  |
| H  | -2.097021 | 2.436131  | 2.112065  |
| H  | -3.382143 | 2.429794  | 0.868622  |
| H  | -1.680451 | 2.707133  | 0.392215  |
| H  | 4.144359  | 1.988657  | -0.449395 |
| H  | 2.062676  | 3.449862  | -0.803624 |
| C  | 3.739826  | 1.688573  | 0.530347  |
| H  | 4.147794  | 2.367321  | 1.296631  |
| H  | 4.102147  | 0.669514  | 0.747211  |
| C  | 1.710107  | 3.123055  | 0.189479  |
| H  | 2.066108  | 3.857866  | 0.928579  |
| O  | 1.745183  | 0.847525  | -0.516377 |
| C  | 2.205917  | 1.701227  | 0.492973  |
| H  | 0.606635  | 3.159127  | 0.203351  |
| C  | 1.646627  | 1.250164  | 1.850500  |
| H  | 1.965310  | 1.908370  | 2.674852  |
| H  | 1.987036  | 0.226257  | 2.078244  |
| H  | 0.544696  | 1.243764  | 1.818386  |
| Na | 0.189370  | 1.443491  | -1.897944 |
| H  | 2.918475  | -3.320911 | 0.264093  |
| H  | 3.735977  | -2.844776 | -1.244589 |
| H  | 2.076945  | -3.478958 | -1.297952 |

41

Figure 10 NaOtBu\_ts(SN2)\_chelate\_05 / electronic energy: -2914.16125846 a.u. / lowest freq: -469.63 cm-1

|    |           |           |           |
|----|-----------|-----------|-----------|
| C  | -0.118222 | 1.944440  | 2.408962  |
| C  | 0.067334  | 2.325416  | 1.137419  |
| C  | 0.147299  | 1.374031  | 0.043174  |
| O  | 2.186343  | 1.047702  | 0.083898  |
| P  | 2.658023  | -0.344623 | -0.336185 |
| O  | 1.732447  | -1.184786 | -1.177374 |
| O  | 4.066310  | -0.252491 | -1.110863 |
| O  | 3.119426  | -1.147013 | 1.002964  |
| C  | 5.149077  | 0.468347  | -0.551816 |
| H  | -0.144469 | 2.675431  | 3.221050  |
| H  | -0.256774 | 0.891441  | 2.671566  |
| H  | 0.199109  | 3.381782  | 0.889608  |
| H  | -0.037926 | 0.319173  | 0.235675  |
| H  | 0.307652  | 1.709688  | -0.976203 |
| C  | -2.295600 | 3.023429  | -0.889789 |
| Cu | -2.052671 | 1.127812  | -0.635708 |
| H  | 4.863848  | 1.506643  | -0.319266 |
| H  | 5.955652  | 0.478809  | -1.296999 |
| H  | 5.516855  | -0.016823 | 0.366369  |
| C  | 2.309929  | -1.087934 | 2.158586  |
| H  | 2.847614  | -1.596026 | 2.970966  |
| H  | 1.346634  | -1.605960 | 2.006637  |
| H  | 2.114138  | -0.044615 | 2.455281  |
| H  | -4.398729 | -1.436211 | -1.020053 |
| H  | -2.616661 | -3.271425 | -0.911020 |
| C  | -4.184382 | -1.205987 | 0.035739  |
| H  | -4.869322 | -1.794700 | 0.667028  |
| H  | -4.401547 | -0.136710 | 0.199394  |
| C  | -2.420706 | -2.987749 | 0.137056  |
| H  | -3.045106 | -3.630171 | 0.777812  |
| O  | -1.884300 | -0.761038 | -0.513362 |
| C  | -2.709311 | -1.494123 | 0.347502  |
| H  | -1.366156 | -3.214021 | 0.373053  |
| C  | -2.405465 | -1.117373 | 1.804815  |
| H  | -3.020517 | -1.685696 | 2.520956  |
| H  | -2.595399 | -0.043232 | 1.966524  |
| H  | -1.344839 | -1.313994 | 2.030924  |
| Na | -0.296364 | -1.640663 | -1.689386 |
| H  | -2.489169 | 3.538686  | 0.069151  |
| H  | -3.190491 | 3.173263  | -1.526471 |
| H  | -1.458813 | 3.550777  | -1.382434 |

41

Figure 10 NaOtBu\_ts(SN2)\_chelate\_06 / electronic energy: -2914.16058712 a.u. / lowest freq: -465.65 cm-1

|   |           |           |           |
|---|-----------|-----------|-----------|
| C | -0.393806 | 2.273412  | 2.458188  |
| C | -0.327149 | 2.592776  | 1.158680  |
| C | -0.084286 | 1.597641  | 0.130543  |
| O | 1.988562  | 1.519317  | 0.218909  |
| P | 2.475849  | 0.102318  | -0.049635 |
| O | 2.013789  | -0.588778 | -1.314768 |

|    |           |           |           |
|----|-----------|-----------|-----------|
| O  | 4.090572  | 0.051230  | 0.057603  |
| O  | 2.069960  | -0.772035 | 1.252316  |
| C  | 4.874887  | 0.528881  | -1.019275 |
| H  | -0.545994 | 3.039243  | 3.223187  |
| H  | -0.283840 | 1.238449  | 2.795924  |
| H  | -0.421462 | 3.633065  | 0.837170  |
| H  | -0.127405 | 0.541826  | 0.389834  |
| H  | 0.043136  | 1.889549  | -0.907863 |
| C  | -2.784376 | 2.770638  | -0.835996 |
| Cu | -2.184603 | 0.950097  | -0.621201 |
| H  | 4.659970  | -0.022801 | -1.948668 |
| H  | 5.930216  | 0.380168  | -0.754259 |
| H  | 4.702414  | 1.603603  | -1.194431 |
| C  | 2.322482  | -2.162443 | 1.294804  |
| H  | 1.765565  | -2.578930 | 2.144792  |
| H  | 3.396000  | -2.363194 | 1.442229  |
| H  | 1.993728  | -2.664235 | 0.370208  |
| H  | -3.931073 | -2.216595 | -0.880874 |
| H  | -1.706856 | -3.480613 | -1.004224 |
| C  | -3.680216 | -1.915650 | 0.148789  |
| H  | -4.118282 | -2.650601 | 0.843318  |
| H  | -4.155429 | -0.938386 | 0.338040  |
| C  | -1.502679 | -3.157632 | 0.030870  |
| H  | -1.873362 | -3.944978 | 0.705789  |
| O  | -1.654683 | -0.871955 | -0.615807 |
| C  | -2.158641 | -1.796018 | 0.305873  |
| H  | -0.409888 | -3.093503 | 0.173943  |
| C  | -1.814386 | -1.352087 | 1.735561  |
| H  | -2.170414 | -2.069048 | 2.492876  |
| H  | -2.273745 | -0.372467 | 1.949043  |
| H  | -0.722348 | -1.248529 | 1.844397  |
| Na | 0.047209  | -1.289646 | -1.879095 |
| H  | -3.162758 | 3.187489  | 0.115958  |
| H  | -3.631731 | 2.767774  | -1.550919 |
| H  | -2.036571 | 3.481910  | -1.230308 |

18

Figure 10\_PMe3-Cu-Me / electronic energy: -2141.10632939 a.u. / lowest freq: 48.24 cm<sup>-1</sup>

|    |           |           |           |
|----|-----------|-----------|-----------|
| C  | -3.174210 | -0.000111 | 0.003034  |
| Cu | -1.218128 | -0.000017 | -0.004377 |
| H  | 1.485695  | 1.864495  | -1.486105 |
| H  | 1.472200  | 2.375435  | 0.220479  |
| H  | 2.900550  | 1.513940  | -0.440413 |
| C  | 1.802113  | 1.585071  | -0.470122 |
| H  | 1.484538  | -1.003352 | -2.163699 |
| P  | 1.016556  | 0.000356  | -0.001208 |
| H  | 2.904425  | -1.146053 | -1.076522 |
| C  | 1.806153  | -1.203373 | -1.130683 |
| H  | 1.460582  | 0.354164  | 2.360314  |
| H  | 2.889868  | -0.362876 | 1.546358  |
| C  | 1.790846  | -0.381789 | 1.612029  |
| H  | 1.483705  | -2.220634 | -0.863119 |
| H  | 1.465084  | -1.378167 | 1.945957  |
| H  | -3.603801 | 0.847389  | 0.574237  |
| H  | -3.603301 | -0.916753 | 0.455292  |
| H  | -3.611599 | 0.068762  | -1.013271 |

18

Figure 10\_PMe3-Cu-Me (145 deg) / electronic energy: -2141.09872349 a.u. / lowest freq: 70.67 cm<sup>-1</sup>

|    |           |           |           |
|----|-----------|-----------|-----------|
| C  | 2.986403  | 0.429986  | 0.001317  |
| Cu | 1.209233  | -0.403967 | -0.002538 |
| H  | -2.134640 | -1.649554 | -1.405264 |
| H  | -2.266471 | -2.064939 | 0.321256  |
| H  | -3.305403 | -0.775455 | -0.367257 |
| C  | -2.305420 | -1.235190 | -0.400235 |
| H  | -1.132841 | 0.985699  | -2.206823 |
| P  | -0.993945 | -0.020999 | -0.000828 |
| H  | -2.376578 | 1.680456  | -1.116316 |
| C  | -1.333018 | 1.334833  | -1.183242 |
| H  | -1.529418 | -0.096182 | 2.370291  |
| H  | -2.600021 | 1.060874  | 1.514468  |
| C  | -1.569682 | 0.679821  | 1.590594  |
| H  | -0.656624 | 2.176598  | -0.972123 |
| H  | -0.901078 | 1.500563  | 1.889487  |
| H  | 3.173312  | 0.957950  | 0.958111  |
| H  | 3.028690  | 1.211355  | -0.784702 |
| H  | 3.872806  | -0.214028 | -0.165717 |

18

Figure 10\_PMe3-Cu-Me (130 deg) / electronic energy: -2141.09184945 a.u. / lowest freq: 64.28 cm<sup>-1</sup>

|    |           |           |           |
|----|-----------|-----------|-----------|
| C  | -2.793067 | 0.634795  | 0.003198  |
| Cu | -1.209852 | -0.548529 | -0.000796 |
| H  | 2.491441  | -1.854450 | 0.548946  |
| H  | 2.364824  | -1.620937 | -1.211470 |
| H  | 3.382906  | -0.510902 | -0.237068 |
| C  | 2.449785  | -1.096300 | -0.247739 |
| H  | 1.416395  | 0.166783  | 2.383349  |
| P  | 0.974752  | -0.035139 | 0.000431  |
| H  | 2.379267  | 1.363576  | 1.455654  |
| C  | 1.398590  | 0.868943  | 1.536305  |
| H  | 1.077859  | 0.788383  | -2.284234 |
| H  | 2.176859  | 1.731554  | -1.223537 |
| C  | 1.189601  | 1.247965  | -1.290435 |
| H  | 0.627057  | 1.627213  | 1.737473  |
| H  | 0.403187  | 2.009430  | -1.178877 |
| H  | -2.698455 | 1.374689  | -0.817631 |
| H  | -2.819705 | 1.229379  | 0.939308  |
| H  | -3.806671 | 0.197286  | -0.103270 |

18

Figure 10\_PMe3-Cu-Me (115 deg) / electronic energy: -2141.08375606 a.u. / lowest freq: 53.84 cm<sup>-1</sup>

|    |           |           |           |
|----|-----------|-----------|-----------|
| C  | -2.523187 | 0.860312  | 0.018122  |
| Cu | -1.240498 | -0.655287 | -0.018743 |
| H  | 2.637532  | -1.753029 | 0.461357  |
| H  | 2.489760  | -1.447281 | -1.285540 |
| H  | 3.396412  | -0.294798 | -0.253736 |
| C  | 2.521929  | -0.963755 | -0.297257 |
| H  | 1.362090  | 0.063118  | 2.387118  |
| P  | 0.948757  | -0.059198 | -0.007318 |
| H  | 2.243148  | 1.366834  | 1.527303  |
| C  | 1.298745  | 0.801914  | 1.573915  |
| H  | 0.945775  | 0.903025  | -2.244070 |
| H  | 2.035189  | 1.826601  | -1.157993 |
| C  | 1.067047  | 1.305864  | -1.227140 |
| H  | 0.475018  | 1.493639  | 1.804268  |
| H  | 0.255507  | 2.026002  | -1.045499 |
| H  | -2.485771 | 1.405727  | -0.947115 |
| H  | -2.198057 | 1.591325  | 0.786240  |
| H  | -3.600725 | 0.684099  | 0.215153  |

39

Figure 10\_PMe3\_ts(SN2')\_01 / electronic energy: -2979.90366207 a.u. / lowest freq: -311.45 cm-1

|    |           |           |           |
|----|-----------|-----------|-----------|
| C  | 0.127563  | 2.071313  | 0.221292  |
| C  | 0.103908  | 1.076812  | 1.228954  |
| C  | -0.143248 | -0.269568 | 0.937382  |
| O  | -2.172044 | -0.670485 | 1.292540  |
| P  | -2.876243 | -0.576753 | -0.059972 |
| O  | -2.316636 | -1.263607 | -1.261928 |
| O  | -4.417030 | -1.016380 | 0.257215  |
| O  | -3.040548 | 1.009149  | -0.455363 |
| C  | -5.325802 | -1.107936 | -0.817611 |
| H  | 0.286269  | 3.116117  | 0.498956  |
| H  | -0.424360 | 1.906662  | -0.710472 |
| H  | 0.354453  | 1.346761  | 2.259571  |
| H  | -0.288794 | -0.608708 | -0.091654 |
| H  | 0.083403  | -1.034963 | 1.677734  |
| C  | 2.610225  | 2.197270  | -1.324632 |
| Cu | 1.755649  | 0.963446  | -0.048576 |
| H  | -6.292702 | -1.439558 | -0.412833 |
| H  | -4.985685 | -1.834960 | -1.573030 |
| H  | -5.468829 | -0.132587 | -1.314667 |
| C  | -3.496380 | 1.925100  | 0.511597  |
| H  | -3.330144 | 2.940976  | 0.123959  |
| H  | -2.954881 | 1.812279  | 1.465029  |
| H  | -4.575193 | 1.799120  | 0.710584  |
| H  | 1.543670  | -2.735327 | 0.256537  |
| H  | 1.863694  | -2.357054 | -1.455308 |
| H  | 3.077299  | -3.272287 | -0.501758 |
| C  | 2.328939  | -2.466223 | -0.464387 |
| H  | 3.046497  | -1.439472 | 2.382309  |
| P  | 3.101891  | -0.886756 | 0.023114  |
| H  | 4.535508  | -2.081214 | 1.610927  |
| C  | 3.843916  | -1.226062 | 1.655375  |
| H  | 4.177458  | -0.637363 | -2.131385 |
| H  | 5.184729  | -1.623928 | -1.024142 |
| C  | 4.533654  | -0.739401 | -1.095724 |
| H  | 4.392945  | -0.336072 | 1.997270  |
| H  | 5.113496  | 0.159349  | -0.839632 |
| H  | 2.706084  | 1.665063  | -2.286928 |
| H  | 3.625814  | 2.405679  | -0.944526 |
| H  | 2.104170  | 3.156945  | -1.508170 |

39

Figure 10\_PMe3\_ts(SN2')\_02 / electronic energy: -2979.90320903 a.u. / lowest freq: -287.91 cm-1

|    |           |           |           |
|----|-----------|-----------|-----------|
| C  | 0.003084  | 1.938674  | -0.029517 |
| C  | -0.018094 | 0.984289  | 1.017301  |
| C  | -0.159841 | -0.380593 | 0.745408  |
| O  | -2.215703 | -0.882820 | 0.889535  |
| P  | -2.928366 | -0.187386 | -0.275418 |
| O  | -2.213610 | -0.053459 | -1.583297 |
| O  | -4.395028 | -0.897948 | -0.439048 |
| O  | -3.422085 | 1.289115  | 0.195833  |
| C  | -4.439637 | -2.260435 | -0.791177 |
| H  | 0.089837  | 3.001175  | 0.210328  |
| H  | -0.495726 | 1.691069  | -0.973345 |
| H  | 0.147933  | 1.299293  | 2.052129  |
| H  | -0.232038 | -0.732037 | -0.285609 |
| H  | 0.035154  | -1.119509 | 1.521476  |
| C  | 2.569047  | 2.111031  | -1.449660 |
| Cu | 1.701534  | 0.910364  | -0.153020 |
| H  | -5.495179 | -2.560784 | -0.858306 |
| H  | -3.940460 | -2.891190 | -0.035650 |
| H  | -3.961297 | -2.441217 | -1.769504 |
| C  | -4.011418 | 1.469293  | 1.462468  |
| H  | -4.020297 | 2.546790  | 1.682570  |
| H  | -3.443652 | 0.947523  | 2.249993  |
| H  | -5.050990 | 1.099677  | 1.478321  |
| H  | 1.709026  | -2.730466 | -0.115553 |
| H  | 2.435052  | -2.200428 | -1.655690 |
| H  | 3.412778  | -3.149427 | -0.489610 |
| C  | 2.636239  | -2.375578 | -0.588347 |
| H  | 2.583114  | -1.565326 | 2.417781  |
| P  | 3.163211  | -0.809619 | 0.186695  |
| H  | 4.251900  | -2.063661 | 1.984144  |
| C  | 3.513207  | -1.249973 | 1.922634  |
| H  | 4.710160  | -0.299173 | -1.606710 |
| H  | 5.478219  | -1.355159 | -0.376201 |
| C  | 4.809885  | -0.494119 | -0.528911 |
| H  | 3.903567  | -0.367005 | 2.450043  |
| H  | 5.253170  | 0.394532  | -0.056012 |



|   |          |          |           |
|---|----------|----------|-----------|
| H | 2.779999 | 1.516433 | -2.355924 |
| H | 3.532358 | 2.430868 | -1.015274 |
| H | 2.006773 | 3.007882 | -1.750348 |

39

Figure 10\_PMe3\_ts(SN2')\_03 / electronic energy: -2979.90323285 a.u. / lowest freq: -289.25 cm-1

|    |           |           |           |
|----|-----------|-----------|-----------|
| C  | 0.061900  | 2.006077  | 0.342722  |
| C  | 0.096930  | 0.960089  | 1.295536  |
| C  | -0.093769 | -0.371568 | 0.911403  |
| O  | -2.129041 | -0.853469 | 1.207613  |
| P  | -2.938491 | -0.270664 | 0.053558  |
| O  | -2.234291 | 0.045069  | -1.236744 |
| O  | -4.233945 | -1.236636 | -0.217354 |
| O  | -3.722548 | 1.022237  | 0.649166  |
| C  | -4.014864 | -2.478650 | -0.842608 |
| H  | 0.182497  | 3.041743  | 0.669339  |
| H  | -0.500608 | 1.847163  | -0.585005 |
| H  | 0.349150  | 1.177420  | 2.337967  |
| H  | -0.261709 | -0.619505 | -0.138137 |
| H  | 0.157177  | -1.180541 | 1.595940  |
| C  | 2.540147  | 2.336480  | -1.184563 |
| Cu | 1.728351  | 0.974924  | -0.015452 |
| H  | -4.988511 | -2.973754 | -0.968818 |
| H  | -3.368559 | -3.130833 | -0.228984 |
| H  | -3.547870 | -2.356718 | -1.834972 |
| C  | -4.541980 | 1.789124  | -0.204400 |
| H  | -4.698697 | 2.771439  | 0.264606  |
| H  | -5.524182 | 1.309101  | -0.352883 |
| H  | -4.070377 | 1.937155  | -1.189767 |
| H  | 1.669099  | -2.735454 | 0.255093  |
| H  | 1.941843  | -2.352111 | -1.464699 |
| H  | 3.207759  | -3.214879 | -0.529640 |
| C  | 2.428969  | -2.438680 | -0.482126 |
| H  | 3.182963  | -1.371985 | 2.345673  |
| P  | 3.145187  | -0.825715 | -0.016568 |
| H  | 4.671586  | -1.957987 | 1.530118  |
| C  | 3.948296  | -1.130668 | 1.593500  |
| H  | 4.151612  | -0.537347 | -2.200136 |
| H  | 5.234192  | -1.468278 | -1.116006 |
| C  | 4.538355  | -0.617326 | -1.173518 |
| H  | 4.472237  | -0.218456 | 1.915713  |
| H  | 5.080092  | 0.309582  | -0.934802 |
| H  | 2.859603  | 1.840514  | -2.117234 |
| H  | 3.442246  | 2.710148  | -0.667925 |
| H  | 1.910529  | 3.199608  | -1.449317 |

39

Figure 10\_PMe3\_ts(SN2')\_04 / electronic energy: -2979.90323285 a.u. / lowest freq: -289.26 cm-1

|    |           |           |           |
|----|-----------|-----------|-----------|
| C  | 0.061897  | 2.006075  | 0.342717  |
| C  | 0.096926  | 0.960090  | 1.295533  |
| C  | -0.093770 | -0.371569 | 0.911403  |
| O  | -2.129039 | -0.853471 | 1.207611  |
| P  | -2.938490 | -0.270665 | 0.053557  |
| O  | -2.234292 | 0.045064  | -1.236747 |
| O  | -4.233948 | -1.236634 | -0.217349 |
| O  | -3.722541 | 1.022240  | 0.649165  |
| C  | -4.014871 | -2.478648 | -0.842605 |
| H  | 0.182490  | 3.041743  | 0.669330  |
| H  | -0.500608 | 1.847156  | -0.585013 |
| H  | 0.349143  | 1.177424  | 2.337964  |
| H  | -0.261708 | -0.619509 | -0.138137 |
| H  | 0.157178  | -1.180539 | 1.595942  |
| C  | 2.540152  | 2.336481  | -1.184556 |
| Cu | 1.728351  | 0.974924  | -0.015449 |
| H  | -4.988520 | -2.973747 | -0.968817 |
| H  | -3.368570 | -3.130835 | -0.228981 |
| H  | -3.547876 | -2.356717 | -1.834968 |
| C  | -4.541970 | 1.789131  | -0.204401 |
| H  | -4.698683 | 2.771446  | 0.264606  |
| H  | -5.524173 | 1.309112  | -0.352885 |
| H  | -4.070365 | 1.937160  | -1.189767 |
| H  | 1.669100  | -2.735457 | 0.255096  |
| H  | 1.941837  | -2.352112 | -1.464696 |
| H  | 3.207757  | -3.214880 | -0.529643 |
| C  | 2.428967  | -2.438682 | -0.482125 |
| H  | 3.182969  | -1.371983 | 2.345673  |
| P  | 3.145185  | -0.825716 | -0.016568 |
| H  | 4.671587  | -1.957991 | 1.530113  |
| C  | 3.948300  | -1.130670 | 1.593496  |
| H  | 4.151603  | -0.537350 | -2.200140 |
| H  | 5.234189  | -1.468278 | -1.116011 |
| C  | 4.538349  | -0.617327 | -1.173523 |
| H  | 4.472245  | -0.218459 | 1.915707  |
| H  | 5.080086  | 0.309582  | -0.934809 |
| H  | 2.859631  | 1.840515  | -2.117219 |
| H  | 3.442237  | 2.710164  | -0.667904 |
| H  | 1.910528  | 3.199601  | -1.449327 |

39

Figure 10\_PMe3\_ts(SN2')\_01 / electronic energy: -2979.90175960 a.u. / lowest freq: -328.91 cm-1

|   |           |           |           |
|---|-----------|-----------|-----------|
| C | -0.587825 | -1.223973 | -0.734058 |
| C | -0.083496 | -0.182075 | -1.544717 |
| C | 0.430553  | 0.981582  | -0.963620 |
| O | -2.674085 | -0.892840 | -0.660659 |
| P | -3.004909 | 0.112743  | 0.447403  |
| O | -1.912357 | 0.548083  | 1.374183  |
| O | -3.757899 | 1.391249  | -0.253456 |
| O | -4.251212 | -0.443323 | 1.326376  |
| C | -3.076632 | 2.100866  | -1.258116 |
| H | -0.767092 | -2.212690 | -1.151431 |

|    |           |           |           |
|----|-----------|-----------|-----------|
| H  | -0.615750 | -1.104462 | 0.349166  |
| H  | -0.012191 | -0.345248 | -2.624415 |
| H  | 0.094052  | 1.256224  | 0.043552  |
| H  | 0.835918  | 1.777459  | -1.593745 |
| C  | 2.084845  | -2.551452 | -0.227979 |
| Cu | 1.629771  | -0.645861 | -0.507719 |
| H  | -3.765740 | 2.851498  | -1.672343 |
| H  | -2.750047 | 1.435256  | -2.075921 |
| H  | -2.191378 | 2.626381  | -0.858517 |
| C  | -5.375670 | -0.999401 | 0.682036  |
| H  | -6.007400 | -1.468783 | 1.449716  |
| H  | -5.078848 | -1.763762 | -0.054163 |
| H  | -5.966560 | -0.224348 | 0.165291  |
| H  | 2.503299  | 0.572287  | 2.656473  |
| H  | 3.431109  | -0.920492 | 2.356585  |
| H  | 4.297379  | 0.625582  | 2.651955  |
| C  | 3.411658  | 0.166233  | 2.187150  |
| H  | 2.523906  | 2.749542  | 0.670289  |
| P  | 3.360947  | 0.491001  | 0.394757  |
| H  | 4.312582  | 2.707401  | 0.795952  |
| C  | 3.441291  | 2.307214  | 0.255131  |
| H  | 5.070250  | -1.162470 | -0.059763 |
| H  | 5.800287  | 0.436583  | 0.297056  |
| C  | 4.978235  | -0.079016 | -0.222487 |
| H  | 3.515867  | 2.589777  | -0.805372 |
| H  | 5.051960  | 0.118403  | -1.302134 |
| H  | 3.170609  | -2.676830 | -0.071769 |
| H  | 1.795910  | -3.195456 | -1.076546 |
| H  | 1.574617  | -2.943270 | 0.669947  |

39

Figure 10\_PMe3\_ts(SN2)\_02 / electronic energy: -2979.90254477 a.u. / lowest freq: -358.42 cm-1

|    |           |           |           |
|----|-----------|-----------|-----------|
| C  | 0.503120  | 1.408040  | -0.473593 |
| C  | -0.016433 | 0.575394  | -1.492168 |
| C  | -0.497039 | -0.701994 | -1.193734 |
| O  | 2.578614  | 1.163855  | -0.571750 |
| P  | 2.976610  | -0.052709 | 0.259082  |
| O  | 1.992790  | -0.680693 | 1.197235  |
| O  | 3.548731  | -1.138571 | -0.825918 |
| O  | 4.321514  | 0.308178  | 1.115161  |
| C  | 4.032024  | -2.372670 | -0.345523 |
| H  | 0.637922  | 2.473468  | -0.647084 |
| H  | 0.569123  | 1.039000  | 0.550656  |
| H  | -0.123514 | 0.988339  | -2.499848 |
| H  | -0.133452 | -1.204217 | -0.289042 |
| H  | -0.902274 | -1.336073 | -1.986301 |
| C  | -2.174355 | 2.498571  | 0.438690  |
| Cu | -1.708085 | 0.735208  | -0.331615 |
| H  | 4.163436  | -3.046526 | -1.204411 |
| H  | 3.324023  | -2.831698 | 0.364176  |
| H  | 5.006038  | -2.257028 | 0.161426  |
| C  | 5.394445  | 0.961220  | 0.475211  |
| H  | 6.234778  | 0.999858  | 1.183215  |
| H  | 5.126500  | 1.990829  | 0.185543  |
| H  | 5.721480  | 0.420975  | -0.430005 |
| H  | -2.598665 | -1.303815 | 2.402672  |
| H  | -3.560426 | 0.194983  | 2.506686  |
| H  | -4.390785 | -1.388791 | 2.347842  |
| C  | -3.509983 | -0.801964 | 2.044978  |
| H  | -2.577943 | -2.874877 | -0.085256 |
| P  | -3.428365 | -0.625710 | 0.232296  |
| H  | -4.367968 | -2.869677 | 0.022261  |
| C  | -3.491934 | -2.340900 | -0.383771 |
| H  | -5.169809 | 1.059812  | 0.223166  |
| H  | -5.865277 | -0.589301 | 0.097534  |
| C  | -5.047564 | 0.067979  | -0.235434 |
| H  | -3.551761 | -2.337377 | -1.482127 |
| H  | -5.097170 | 0.183158  | -1.328325 |
| H  | -3.262657 | 2.575978  | 0.609921  |
| H  | -1.879987 | 3.350284  | -0.198723 |
| H  | -1.677707 | 2.633750  | 1.416423  |

39

Figure 10\_PMe3\_ts(SN2)\_03 / electronic energy: -2979.90254477 a.u. / lowest freq: -358.42 cm-1

|    |           |           |           |
|----|-----------|-----------|-----------|
| C  | -0.503120 | -1.408036 | -0.473599 |
| C  | 0.016439  | -0.575389 | -1.492170 |
| C  | 0.497048  | 0.701997  | -1.193732 |
| O  | -2.578615 | -1.163843 | -0.571769 |
| P  | -2.976613 | 0.052710  | 0.259077  |
| O  | -1.992793 | 0.680689  | 1.197234  |
| O  | -3.548743 | 1.138580  | -0.825910 |
| O  | -4.321513 | -0.308190 | 1.115157  |
| C  | -4.032044 | 2.372670  | -0.345500 |
| H  | -0.637924 | -2.473463 | -0.647090 |
| H  | -0.569129 | -1.038996 | 0.550651  |
| H  | 0.123525  | -0.988334 | -2.499850 |
| H  | 0.133458  | 1.204219  | -0.289041 |
| H  | 0.902288  | 1.336076  | -1.986296 |
| C  | 2.174350  | -2.498570 | 0.438703  |
| Cu | 1.708086  | -0.735208 | -0.331608 |
| H  | -4.163459 | 3.046536  | -1.204380 |
| H  | -3.324047 | 2.831694  | 0.364205  |
| H  | -5.006058 | 2.257017  | 0.161446  |
| C  | -5.394444 | -0.961231 | 0.475203  |
| H  | -6.234774 | -0.999881 | 1.183210  |
| H  | -5.126495 | -1.990835 | 0.185523  |
| H  | -5.721484 | -0.420977 | -0.430005 |
| H  | 2.598676  | 1.303833  | 2.402667  |
| H  | 3.560434  | -0.194965 | 2.506691  |

|   |          |           |           |
|---|----------|-----------|-----------|
| H | 4.390796 | 1.388806  | 2.347832  |
| C | 3.509992 | 0.801978  | 2.044974  |
| H | 2.577959 | 2.874878  | -0.085264 |
| P | 3.428370 | 0.625709  | 0.232294  |
| H | 4.367986 | 2.869669  | 0.022227  |
| C | 3.491942 | 2.340893  | -0.383788 |
| H | 5.169808 | -1.059819 | 0.223174  |
| H | 5.865282 | 0.589291  | 0.097526  |
| C | 5.047566 | -0.067989 | -0.235434 |
| H | 3.551752 | 2.337361  | -1.482145 |
| H | 5.097169 | -0.183178 | -1.328324 |
| H | 3.262649 | -2.575975 | 0.609952  |
| H | 1.879993 | -3.350283 | -0.198716 |
| H | 1.677686 | -2.633751 | 1.416428  |

39

Figure 10\_PMe3\_ts(SN2)\_04 / electronic energy: -2979.90029845 a.u. / lowest freq: -334.51 cm-1

|    |           |           |           |
|----|-----------|-----------|-----------|
| C  | 0.430987  | 1.599527  | -0.411687 |
| C  | -0.033680 | 0.799351  | -1.480885 |
| C  | -0.410615 | -0.528812 | -1.263434 |
| O  | 2.531839  | 1.508811  | -0.520866 |
| P  | 2.989521  | 0.173326  | 0.046390  |
| O  | 2.085873  | -0.611606 | 0.957418  |
| O  | 3.413289  | -0.713764 | -1.260213 |
| O  | 4.432789  | 0.435830  | 0.771096  |
| C  | 3.996830  | -1.979986 | -1.067752 |
| H  | 0.497049  | 2.680095  | -0.517025 |
| H  | 0.534308  | 1.171210  | 0.585878  |
| H  | -0.177834 | 1.268172  | -2.458981 |
| H  | 0.005877  | -1.058673 | -0.398529 |
| H  | -0.778637 | -1.136962 | -2.093737 |
| C  | -2.304967 | 2.454843  | 0.536796  |
| Cu | -1.719884 | 0.762605  | -0.311048 |
| H  | 3.890992  | -2.552533 | -2.001050 |
| H  | 3.499806  | -2.537534 | -0.255675 |
| H  | 5.073115  | -1.896765 | -0.835494 |
| C  | 4.814374  | -0.262446 | 1.935109  |
| H  | 5.454314  | 0.397084  | 2.541032  |
| H  | 5.392923  | -1.169493 | 1.687192  |
| H  | 3.938313  | -0.559694 | 2.531502  |
| H  | -2.234728 | -1.491141 | 2.311552  |
| H  | -3.317892 | -0.099244 | 2.584814  |
| H  | -4.009457 | -1.745065 | 2.383465  |
| C  | -3.213556 | -1.058594 | 2.056644  |
| H  | -2.292547 | -2.898459 | -0.292271 |
| P  | -3.295901 | -0.761429 | 0.259944  |
| H  | -4.063877 | -3.060748 | -0.062968 |
| C  | -3.267647 | -2.426684 | -0.482351 |
| H  | -5.146495 | 0.779810  | 0.503555  |
| H  | -5.731916 | -0.908591 | 0.341249  |
| C  | -4.997670 | -0.173875 | -0.022861 |
| H  | -3.408807 | -2.344112 | -1.570226 |
| H  | -5.157386 | -0.004568 | -1.098048 |
| H  | -3.396839 | 2.444495  | 0.701920  |
| H  | -2.068900 | 3.350803  | -0.062733 |
| H  | -1.823706 | 2.583793  | 1.522983  |

22

Figure 10\_NHMe2-Cu-Me / electronic energy: -1985.96094373 a.u. / lowest freq: 47.08 cm-1

|    |           |           |           |
|----|-----------|-----------|-----------|
| C  | 3.475391  | 0.002063  | 0.004430  |
| Cu | 1.521142  | 0.004375  | -0.001634 |
| H  | -1.135412 | 2.981141  | -0.894012 |
| H  | -3.137350 | 1.184719  | -0.886358 |
| C  | -0.769814 | 2.447027  | -0.001471 |
| H  | 0.328227  | 2.458734  | -0.004855 |
| H  | -1.129885 | 2.980832  | 0.893515  |
| C  | -2.645394 | 0.759300  | 0.002746  |
| N  | -1.219353 | 1.079660  | -0.000493 |
| H  | -3.133239 | 1.184460  | 0.894244  |
| H  | -3.126534 | -1.205033 | -0.886897 |
| C  | -0.427861 | 0.001650  | -0.001913 |
| C  | -2.638619 | -0.775607 | 0.002525  |
| N  | -1.209960 | -1.083240 | -0.000302 |
| H  | -3.123109 | -1.205275 | 0.893693  |
| H  | -1.107482 | -2.983726 | -0.894321 |
| C  | -0.747529 | -2.446288 | -0.001472 |
| H  | 0.350624  | -2.446961 | -0.004459 |
| H  | -1.102596 | -2.983800 | 0.893295  |
| H  | 3.915586  | -0.379653 | -0.939434 |
| H  | 3.905569  | -0.628204 | 0.809484  |
| H  | 3.910649  | 1.012075  | 0.149980  |

22

Figure 10\_NHMe2-Cu-Me (145 deg) / electronic energy: -1985.95101987 a.u. / lowest freq: 65.14 cm-1

|    |           |           |           |
|----|-----------|-----------|-----------|
| C  | 3.192263  | 0.005839  | 0.763728  |
| Cu | 1.540502  | -0.008810 | -0.304097 |
| H  | -1.261123 | 2.994500  | -0.926348 |
| H  | -3.258612 | 1.205091  | -0.417059 |
| C  | -0.725052 | 2.446519  | -0.133506 |
| H  | 0.349264  | 2.449318  | -0.360556 |
| H  | -0.884226 | 2.975166  | 0.821115  |
| C  | -2.558978 | 0.775877  | 0.317869  |
| N  | -1.177782 | 1.083721  | -0.045634 |
| H  | -2.800938 | 1.204853  | 1.303510  |
| H  | -3.267548 | -1.182467 | -0.417547 |
| C  | -0.415497 | -0.000999 | -0.231950 |
| C  | -2.565769 | -0.758802 | 0.318610  |
| N  | -1.186529 | -1.078864 | -0.041885 |
| H  | -2.813668 | -1.184740 | 1.304055  |
| H  | -1.283941 | -2.990151 | -0.920397 |

|   |           |           |           |
|---|-----------|-----------|-----------|
| C | -0.744891 | -2.445394 | -0.127327 |
| H | 0.329753  | -2.457080 | -0.352608 |
| H | -0.909797 | -2.971594 | 0.827657  |
| H | 4.174743  | -0.125412 | 0.265113  |
| H | 3.139353  | -0.792369 | 1.532272  |
| H | 3.269899  | 0.958134  | 1.327698  |

22

Figure 10\_NHMe2-Cu-Me\_(130 deg) / electronic energy: -1985.94203020 a.u. / lowest freq: 66.01 cm<sup>-1</sup>

|    |           |           |           |
|----|-----------|-----------|-----------|
| C  | 2.916804  | 0.083913  | 1.041177  |
| Cu | 1.560875  | -0.165784 | -0.382593 |
| H  | -1.100020 | 3.080858  | -0.903190 |
| H  | -3.145116 | 1.504103  | -0.169386 |
| C  | -0.475067 | 2.434808  | -0.265830 |
| H  | 0.519310  | 2.338318  | -0.721144 |
| H  | -0.364827 | 2.921445  | 0.718846  |
| C  | -2.396185 | 0.956202  | 0.422162  |
| N  | -1.058425 | 1.125576  | -0.140292 |
| H  | -2.427575 | 1.346944  | 1.453721  |
| H  | -3.304045 | -0.874436 | -0.408646 |
| C  | -0.396924 | -0.030616 | -0.299326 |
| C  | -2.581140 | -0.564038 | 0.364992  |
| N  | -1.240045 | -1.024008 | 0.014247  |
| H  | -2.908275 | -0.993768 | 1.323978  |
| H  | -1.580590 | -2.897149 | -0.886411 |
| C  | -0.952050 | -2.427644 | -0.110303 |
| H  | 0.103871  | -2.550887 | -0.385027 |
| H  | -1.131651 | -2.951636 | 0.842617  |
| H  | 4.005959  | -0.021257 | 0.857926  |
| H  | 2.683544  | -0.619927 | 1.866630  |
| H  | 2.780717  | 1.098398  | 1.470369  |

22

Figure 10\_NHMe2-Cu-Me\_(115 deg) / electronic energy: -1985.93143678 a.u. / lowest freq: 49.29 cm<sup>-1</sup>

|    |           |           |           |
|----|-----------|-----------|-----------|
| C  | 2.478775  | -0.091399 | 1.352414  |
| Cu | 1.608051  | 0.094442  | -0.433366 |
| H  | -1.537768 | 3.049061  | -0.706323 |
| H  | -3.289362 | 1.148637  | 0.069215  |
| C  | -0.776413 | 2.437272  | -0.196420 |
| H  | 0.169537  | 2.515997  | -0.747986 |
| H  | -0.625973 | 2.848507  | 0.817603  |
| C  | -2.412817 | 0.667866  | 0.528173  |
| N  | -1.178270 | 1.056842  | -0.149620 |
| H  | -2.374461 | 0.970828  | 1.589537  |
| H  | -3.123948 | -1.197031 | -0.405492 |
| C  | -0.367622 | 0.017056  | -0.411851 |
| C  | -2.404340 | -0.853599 | 0.358155  |
| N  | -1.036498 | -1.100774 | -0.088609 |
| H  | -2.620024 | -1.391946 | 1.293236  |
| H  | -1.098327 | -2.949076 | -1.108221 |
| C  | -0.555410 | -2.440596 | -0.292299 |
| H  | 0.512301  | -2.399753 | -0.545729 |
| H  | -0.674382 | -3.036973 | 0.626520  |
| H  | 3.574606  | -0.068260 | 1.526464  |
| H  | 2.126534  | -1.045913 | 1.796057  |
| H  | 2.058137  | 0.705032  | 2.001302  |

43

Figure 10\_NHMe2\_ts(SN2')\_01 / electronic energy: -2824.75801259 a.u. / lowest freq: -332.64 cm<sup>-1</sup>

|    |           |           |           |
|----|-----------|-----------|-----------|
| C  | 0.347635  | 1.989740  | -0.106498 |
| C  | 0.246850  | 0.984148  | -1.102161 |
| C  | 0.335188  | -0.374155 | -0.769588 |
| O  | 2.279104  | -1.022377 | -1.014600 |
| P  | 3.145405  | -0.434619 | 0.098203  |
| O  | 2.543889  | -0.069348 | 1.418038  |
| O  | 4.389749  | -1.455385 | 0.377614  |
| O  | 3.898057  | 0.846345  | -0.592058 |
| C  | 5.093834  | -2.008917 | -0.710569 |
| H  | 0.322083  | 3.042557  | -0.399244 |
| H  | 0.898902  | 1.755833  | 0.811526  |
| H  | 0.041420  | 1.255547  | -2.142199 |
| H  | 0.419730  | -0.673858 | 0.275696  |
| H  | 0.016049  | -1.132133 | -1.483293 |
| C  | -2.054671 | 2.452741  | 1.458220  |
| Cu | -1.401508 | 1.107645  | 0.169195  |
| H  | 5.917017  | -2.615302 | -0.306195 |
| H  | 5.521837  | -1.227267 | -1.361779 |
| H  | 4.444989  | -2.653343 | -1.326395 |
| C  | 4.748954  | 1.639242  | 0.203466  |
| H  | 5.052822  | 2.514196  | -0.389536 |
| H  | 5.657231  | 1.087109  | 0.503234  |
| H  | 4.239094  | 1.986426  | 1.117110  |
| H  | -4.029718 | 0.269215  | -2.887232 |
| H  | -4.881871 | -1.977450 | -1.583513 |
| C  | -4.042538 | 0.708315  | -1.876872 |
| H  | -3.257758 | 1.473465  | -1.810943 |
| H  | -5.020179 | 1.193009  | -1.720559 |
| C  | -4.738911 | -1.399638 | -0.658510 |
| N  | -3.801834 | -0.297237 | -0.875356 |
| H  | -5.719880 | -1.004403 | -0.347332 |
| H  | -3.659247 | -3.171653 | 0.093334  |
| C  | -2.809476 | -0.276428 | 0.013585  |
| C  | -4.046347 | -2.203154 | 0.450816  |
| N  | -2.935964 | -1.327374 | 0.823480  |
| H  | -4.699727 | -2.394831 | 1.314796  |
| H  | -1.443302 | -2.602748 | 1.591587  |
| C  | -2.007503 | -1.694413 | 1.861463  |
| H  | -1.298626 | -0.871089 | 2.019867  |
| H  | -2.539757 | -1.883256 | 2.806644  |
| H  | -1.321857 | 3.185371  | 1.829575  |

|   |           |          |          |
|---|-----------|----------|----------|
| H | -2.480181 | 1.914120 | 2.322455 |
| H | -2.876303 | 3.001571 | 0.963759 |

43

Figure 10\_NHcMe2\_ts(SN2')\_02 / electronic energy: -2824.75692951 a.u. / lowest freq: -329.61 cm<sup>-1</sup>

|    |           |           |           |
|----|-----------|-----------|-----------|
| C  | 0.283321  | 2.135092  | 0.374609  |
| C  | 0.274001  | 1.402786  | -0.839856 |
| C  | 0.431017  | 0.010974  | -0.852735 |
| O  | 2.417126  | -0.452685 | -1.170397 |
| P  | 3.190172  | -0.279043 | 0.144860  |
| O  | 2.435382  | -0.361352 | 1.433776  |
| O  | 4.455113  | -1.317223 | 0.091417  |
| O  | 4.019254  | 1.117033  | 0.113991  |
| C  | 4.192147  | -2.683408 | -0.125733 |
| H  | 0.205075  | 3.224788  | 0.347355  |
| H  | 0.809796  | 1.709640  | 1.237026  |
| H  | 0.078246  | 1.916912  | -1.786052 |
| H  | 0.515010  | -0.532412 | 0.088807  |
| H  | 0.174170  | -0.557614 | -1.745463 |
| C  | -2.202755 | 2.111811  | 1.866871  |
| Cu | -1.409323 | 1.113038  | 0.356908  |
| H  | 5.145749  | -3.226994 | -0.062406 |
| H  | 3.748446  | -2.856292 | -1.120785 |
| H  | 3.507676  | -3.092801 | 0.637972  |
| C  | 4.778236  | 1.461888  | -1.022559 |
| H  | 5.031143  | 2.529463  | -0.949711 |
| H  | 4.210210  | 1.293852  | -1.952099 |
| H  | 5.713751  | 0.879549  | -1.072492 |
| H  | -4.222145 | 0.721839  | -2.724478 |
| H  | -4.764591 | -1.798333 | -1.898961 |
| C  | -4.116645 | 0.951166  | -1.652385 |
| H  | -3.337769 | 1.714636  | -1.528343 |
| H  | -5.073402 | 1.361814  | -1.288765 |
| C  | -4.601406 | -1.409629 | -0.882942 |
| N  | -3.743968 | -0.224921 | -0.910880 |
| H  | -5.583451 | -1.154265 | -0.451934 |
| H  | -3.378906 | -3.218713 | -0.560824 |
| C  | -2.705814 | -0.315462 | -0.079886 |
| C  | -3.800501 | -2.371524 | 0.004647  |
| N  | -2.724725 | -1.514644 | 0.501796  |
| H  | -4.390643 | -2.778946 | 0.838538  |
| H  | -1.085867 | -2.776878 | 0.917430  |
| C  | -1.721502 | -2.018545 | 1.404567  |
| H  | -1.087935 | -1.188502 | 1.744372  |
| H  | -2.196254 | -2.477305 | 2.285488  |
| H  | -1.586830 | 2.901226  | 2.323795  |
| H  | -2.472327 | 1.383953  | 2.651549  |
| H  | -3.136106 | 2.568799  | 1.492447  |

43

Figure 10\_NHcMe2\_ts(SN2')\_03 / electronic energy: -2824.75750602 a.u. / lowest freq: -318.36 cm<sup>-1</sup>

|    |           |           |           |
|----|-----------|-----------|-----------|
| C  | 0.299536  | 2.059787  | 0.304744  |
| C  | 0.227757  | 1.334570  | -0.913709 |
| C  | 0.393992  | -0.054861 | -0.960835 |
| O  | 2.350016  | -0.502323 | -1.443443 |
| P  | 3.136604  | -0.590563 | -0.134792 |
| O  | 2.576732  | -1.318870 | 1.042723  |
| O  | 4.598997  | -1.158786 | -0.587598 |
| O  | 3.489879  | 0.929706  | 0.369246  |
| C  | 5.565058  | -1.390306 | 0.413351  |
| H  | 0.222045  | 3.149749  | 0.282499  |
| H  | 0.875678  | 1.647144  | 1.139891  |
| H  | -0.023760 | 1.859369  | -1.840663 |
| H  | 0.526515  | -0.628229 | -0.041276 |
| H  | 0.082261  | -0.609228 | -1.844776 |
| C  | -2.062777 | 2.051232  | 1.945445  |
| Cu | -1.396948 | 1.054423  | 0.374191  |
| H  | 6.464510  | -1.795134 | -0.072013 |
| H  | 5.205322  | -2.115858 | 1.161325  |
| H  | 5.839714  | -0.458696 | 0.938170  |
| C  | 3.942842  | 1.890269  | -0.555517 |
| H  | 3.809604  | 2.886025  | -0.107173 |
| H  | 3.373767  | 1.844973  | -1.498085 |
| H  | 5.013337  | 1.752431  | -0.788363 |
| H  | -4.529644 | 0.936319  | -2.394738 |
| H  | -4.989704 | -1.648563 | -1.758612 |
| C  | -4.300397 | 1.068784  | -1.325750 |
| H  | -3.503256 | 1.817108  | -1.225970 |
| H  | -5.204828 | 1.444324  | -0.818696 |
| C  | -4.722489 | -1.352163 | -0.733636 |
| N  | -3.858625 | -0.171777 | -0.743749 |
| H  | -5.654730 | -1.131925 | -0.187528 |
| H  | -3.485952 | -3.178493 | -0.696853 |
| C  | -2.750416 | -0.334309 | -0.020952 |
| C  | -3.849217 | -2.390038 | -0.017183 |
| N  | -2.727159 | -1.579149 | 0.454902  |
| H  | -4.360934 | -2.875638 | 0.826772  |
| H  | -1.041534 | -2.844404 | 0.589835  |
| C  | -1.648156 | -2.163581 | 1.210156  |
| H  | -1.000098 | -1.365732 | 1.596487  |
| H  | -2.047071 | -2.731218 | 2.064375  |
| H  | -1.397997 | 2.813436  | 2.379074  |
| H  | -2.306911 | 1.314362  | 2.730014  |
| H  | -3.002806 | 2.540423  | 1.634474  |

43

Figure 10\_NHcMe2\_ts(SN2')\_04 / electronic energy: -2824.75669355 a.u. / lowest freq: -334.18 cm<sup>-1</sup>

|   |          |           |           |
|---|----------|-----------|-----------|
| C | 0.406872 | 1.945905  | 0.167794  |
| C | 0.269392 | 1.141918  | -0.993265 |
| C | 0.348521 | -0.253671 | -0.926999 |

|    |           |           |           |
|----|-----------|-----------|-----------|
| O  | 2.298302  | -0.846276 | -1.364389 |
| P  | 3.198233  | -0.364838 | -0.229175 |
| O  | 2.662963  | -0.354048 | 1.174373  |
| O  | 4.611805  | -1.188231 | -0.304206 |
| O  | 3.741564  | 1.099827  | -0.683997 |
| C  | 4.673287  | -2.467075 | 0.281753  |
| H  | 0.404836  | 3.034397  | 0.070796  |
| H  | 0.960743  | 1.537143  | 1.020968  |
| H  | 0.046018  | 1.608490  | -1.957576 |
| H  | 0.477072  | -0.750225 | 0.035015  |
| H  | 0.005896  | -0.861606 | -1.763150 |
| C  | -1.997724 | 2.196521  | 1.791082  |
| Cu | -1.354638 | 1.057089  | 0.310957  |
| H  | 5.690370  | -2.859016 | 0.136566  |
| H  | 3.962120  | -3.167654 | -0.190746 |
| H  | 4.457814  | -2.428000 | 1.362723  |
| C  | 4.510541  | 1.860901  | 0.218664  |
| H  | 4.648272  | 2.861847  | -0.215207 |
| H  | 5.504361  | 1.409082  | 0.380406  |
| H  | 4.009685  | 1.959938  | 1.195505  |
| H  | -4.323972 | 0.779708  | -2.607376 |
| H  | -4.997008 | -1.688174 | -1.683032 |
| C  | -4.178461 | 1.023345  | -1.543139 |
| H  | -3.363311 | 1.753241  | -1.453893 |
| H  | -5.105436 | 1.482621  | -1.161436 |
| C  | -4.761258 | -1.285755 | -0.686990 |
| N  | -3.839419 | -0.154128 | -0.787622 |
| H  | -5.704240 | -0.962199 | -0.216152 |
| H  | -3.616783 | -3.147268 | -0.381180 |
| C  | -2.774716 | -0.281673 | 0.003285  |
| C  | -3.973663 | -2.271615 | 0.185867  |
| N  | -2.837978 | -1.460593 | 0.622173  |
| H  | -4.548645 | -2.636304 | 1.049567  |
| H  | -1.242418 | -2.789194 | 1.000017  |
| C  | -1.823250 | -1.992853 | 1.495062  |
| H  | -1.141716 | -1.183689 | 1.790328  |
| H  | -2.282240 | -2.411371 | 2.403792  |
| H  | -1.301107 | 2.951590  | 2.185878  |
| H  | -2.297733 | 1.530854  | 2.619002  |
| H  | -2.904091 | 2.709960  | 1.424254  |

43

Figure 10\_NHcMe2\_ts(SN2)\_01 / electronic energy: -2824.75588695 a.u. / lowest freq: -385.60 cm<sup>-1</sup>

|    |           |           |           |
|----|-----------|-----------|-----------|
| C  | 0.874804  | 1.594069  | 0.198186  |
| C  | 0.354569  | 1.244316  | -1.070588 |
| C  | -0.150865 | -0.038489 | -1.311656 |
| O  | 2.918276  | 1.310401  | 0.093500  |
| P  | 3.220058  | -0.183412 | 0.197560  |
| O  | 2.219629  | -1.118425 | 0.802118  |
| O  | 3.620032  | -0.636243 | -1.324485 |
| O  | 4.633626  | -0.377159 | 0.992930  |
| C  | 3.941273  | -1.987126 | -1.561755 |
| H  | 1.037649  | 2.638480  | 0.455408  |
| H  | 0.879791  | 0.864192  | 1.007278  |
| H  | 0.281525  | 2.024870  | -1.833952 |
| H  | 0.198133  | -0.871381 | -0.691389 |
| H  | -0.558375 | -0.288188 | -2.294731 |
| C  | -1.778477 | 2.427081  | 1.310919  |
| Cu | -1.363405 | 0.974056  | 0.015731  |
| H  | 4.125734  | -2.109503 | -2.638774 |
| H  | 3.118856  | -2.657980 | -1.262715 |
| H  | 4.851028  | -2.291794 | -1.015069 |
| C  | 5.743822  | 0.413294  | 0.631018  |
| H  | 6.595313  | 0.105327  | 1.254778  |
| H  | 5.547398  | 1.484786  | 0.799635  |
| H  | 6.015062  | 0.272114  | -0.429426 |
| H  | -4.661334 | 0.866907  | -2.289587 |
| H  | -5.362077 | -1.551797 | -1.227821 |
| C  | -4.413917 | 1.119658  | -1.245527 |
| H  | -3.568107 | 1.820308  | -1.240568 |
| H  | -5.285912 | 1.617396  | -0.791681 |
| C  | -5.013714 | -1.136425 | -0.269287 |
| N  | -4.054508 | -0.057303 | -0.498860 |
| H  | -5.892022 | -0.756861 | 0.275788  |
| H  | -4.072287 | -3.111124 | 0.045087  |
| C  | -2.863895 | -0.291586 | 0.050895  |
| C  | -4.191076 | -2.140624 | 0.552010  |
| N  | -2.896409 | -1.469657 | 0.670682  |
| H  | -4.619356 | -2.327575 | 1.548879  |
| H  | -1.494005 | -3.026865 | 0.851510  |
| C  | -1.794119 | -2.093978 | 1.356186  |
| H  | -0.935812 | -1.410689 | 1.368124  |
| H  | -2.067533 | -2.332320 | 2.396324  |
| H  | -1.492399 | 3.428533  | 0.944430  |
| H  | -1.266197 | 2.273497  | 2.277597  |
| H  | -2.863706 | 2.442218  | 1.513607  |

43

Figure 10\_NHcMe2\_ts(SN2)\_02 / electronic energy: -2824.75588696 a.u. / lowest freq: -385.60 cm<sup>-1</sup>

|   |           |           |           |
|---|-----------|-----------|-----------|
| C | 0.874813  | -1.594057 | -0.198211 |
| C | 0.354587  | -1.244287 | 1.070563  |
| C | -0.150844 | 0.038521  | 1.311618  |
| O | 2.918289  | -1.310401 | -0.093544 |
| P | 3.220073  | 0.183413  | -0.197583 |
| O | 2.219667  | 1.118428  | -0.802177 |
| O | 3.619984  | 0.636236  | 1.324482  |
| O | 4.633675  | 0.377164  | -0.992891 |
| C | 3.941198  | 1.987122  | 1.561773  |
| H | 1.037653  | -2.638472 | -0.455421 |

|    |           |           |           |
|----|-----------|-----------|-----------|
| H  | 0.879799  | -0.864190 | -1.007312 |
| H  | 0.281548  | -2.024832 | 1.833937  |
| H  | 0.198147  | 0.871404  | 0.691334  |
| H  | -0.558345 | 0.288235  | 2.294694  |
| C  | -1.778480 | -2.427088 | -1.310904 |
| Cu | -1.363394 | -0.974041 | -0.015746 |
| H  | 4.125690  | 2.109478  | 2.638789  |
| H  | 3.118754  | 2.657962  | 1.262775  |
| H  | 4.850929  | 2.291826  | 1.015065  |
| C  | 5.743862  | -0.413273 | -0.630915 |
| H  | 6.595386  | -0.105290 | -1.254622 |
| H  | 5.547464  | -1.484767 | -0.799547 |
| H  | 6.015033  | -0.272091 | 0.429547  |
| H  | -4.661352 | -0.866931 | 2.289628  |
| H  | -5.362228 | 1.551711  | 1.227782  |
| C  | -4.413870 | -1.119674 | 1.245582  |
| H  | -3.568021 | -1.820277 | 1.240666  |
| H  | -5.285816 | -1.617461 | 0.791695  |
| C  | -5.013744 | 1.136364  | 0.269283  |
| N  | -4.054486 | 0.057305  | 0.498932  |
| H  | -5.891974 | 0.756736  | -0.275876 |
| H  | -4.072257 | 3.111061  | -0.044918 |
| C  | -2.863904 | 0.291580  | -0.050893 |
| C  | -4.191105 | 2.140620  | -0.551944 |
| N  | -2.896464 | 1.469624  | -0.670730 |
| H  | -4.619419 | 2.327699  | -1.548772 |
| H  | -1.494033 | 3.026815  | -0.851531 |
| C  | -1.794187 | 2.093959  | -1.356241 |
| H  | -0.935897 | 1.410649  | -1.368244 |
| H  | -2.067634 | 2.332356  | -2.396357 |
| H  | -1.492342 | -3.428529 | -0.944435 |
| H  | -1.266259 | -2.273480 | -2.277610 |
| H  | -2.863719 | -2.442267 | -1.513533 |

43

Figure 10\_NHcMe2\_ts(SN2)\_03 / electronic energy: -2824.75502346 a.u. / lowest freq: -384.84 cm-1

|    |           |           |           |
|----|-----------|-----------|-----------|
| C  | 0.913335  | 1.557356  | 0.297525  |
| C  | 0.381459  | 1.518172  | -1.013364 |
| C  | -0.157416 | 0.332586  | -1.529992 |
| O  | 2.931221  | 1.114186  | 0.111826  |
| P  | 3.145745  | -0.402671 | 0.190623  |
| O  | 1.967032  | -1.276497 | 0.495111  |
| O  | 3.915731  | -0.864258 | -1.178781 |
| O  | 4.327217  | -0.728007 | 1.252447  |
| C  | 3.317792  | -0.578839 | -2.420380 |
| H  | 1.136882  | 2.512149  | 0.770074  |
| H  | 0.868301  | 0.672069  | 0.931269  |
| H  | 0.329691  | 2.451633  | -1.582114 |
| H  | 0.186225  | -0.624408 | -1.124492 |
| H  | -0.586897 | 0.321293  | -2.535348 |
| C  | -1.693667 | 2.188269  | 1.606639  |
| Cu | -1.317603 | 1.037165  | 0.025530  |
| H  | 4.040459  | -0.829451 | -3.210368 |
| H  | 3.056795  | 0.489646  | -2.508667 |
| H  | 2.406071  | -1.179618 | -2.582581 |
| C  | 5.510372  | 0.040662  | 1.246850  |
| H  | 6.155553  | -0.330620 | 2.055633  |
| H  | 5.298097  | 1.108196  | 1.419777  |
| H  | 6.050786  | -0.060526 | 0.290865  |
| H  | -5.098509 | 1.135721  | -1.619877 |
| H  | -5.466803 | -1.484064 | -0.932010 |
| C  | -4.583037 | 1.198599  | -0.648261 |
| H  | -3.777838 | 1.941549  | -0.719741 |
| H  | -5.308371 | 1.538933  | 0.108889  |
| C  | -4.880308 | -1.234659 | -0.034947 |
| N  | -4.022457 | -0.076110 | -0.282167 |
| H  | -5.585273 | -1.013012 | 0.782823  |
| H  | -3.798037 | -3.118329 | -0.423698 |
| C  | -2.741312 | -0.309588 | 0.004053  |
| C  | -3.864480 | -2.322619 | 0.336028  |
| N  | -2.606832 | -1.577136 | 0.391176  |
| H  | -4.075516 | -2.796250 | 1.306439  |
| H  | -1.134222 | -3.026616 | -0.000620 |
| C  | -1.376308 | -2.244345 | 0.737741  |
| H  | -0.541465 | -1.532413 | 0.769091  |
| H  | -1.468184 | -2.720564 | 1.726508  |
| H  | -1.485013 | 3.255081  | 1.411643  |
| H  | -1.101568 | 1.892204  | 2.490446  |
| H  | -2.760016 | 2.095461  | 1.877122  |

43

Figure 10\_NHcMe2\_ts(SN2)\_04 / electronic energy: -2824.75341246 a.u. / lowest freq: -372.56 cm-1

|    |           |           |           |
|----|-----------|-----------|-----------|
| C  | 0.792916  | 1.819029  | 0.349203  |
| C  | 0.251131  | 1.665370  | -0.948072 |
| C  | -0.171782 | 0.409629  | -1.404414 |
| O  | 2.843365  | 1.605477  | 0.167173  |
| P  | 3.160766  | 0.120469  | 0.044347  |
| O  | 2.180626  | -0.902583 | 0.551753  |
| O  | 3.475273  | -0.110124 | -1.542147 |
| O  | 4.625836  | -0.108035 | 0.729696  |
| C  | 3.878933  | -1.384940 | -1.982598 |
| H  | 0.919016  | 2.812864  | 0.774973  |
| H  | 0.843527  | 0.969489  | 1.030012  |
| H  | 0.102373  | 2.561692  | -1.557449 |
| H  | 0.267234  | -0.491646 | -0.964262 |
| H  | -0.604975 | 0.312109  | -2.403555 |
| C  | -1.936219 | 2.249901  | 1.613322  |
| Cu | -1.394198 | 1.058603  | 0.116152  |
| H  | 3.716268  | -1.441303 | -3.068919 |

|   |           |           |           |
|---|-----------|-----------|-----------|
| H | 3.294131  | -2.185942 | -1.499697 |
| H | 4.951201  | -1.559622 | -1.785434 |
| C | 4.934925  | -1.285003 | 1.443800  |
| H | 5.706371  | -1.038644 | 2.188430  |
| H | 5.337318  | -2.066448 | 0.775962  |
| H | 4.051000  | -1.689429 | 1.959404  |
| H | -4.916692 | 0.736809  | -1.980701 |
| H | -5.163588 | -1.865404 | -1.200305 |
| C | -4.541427 | 0.888929  | -0.956302 |
| H | -3.794896 | 1.693757  | -0.965718 |
| H | -5.385689 | 1.199701  | -0.318914 |
| C | -4.705628 | -1.537562 | -0.255556 |
| N | -3.931242 | -0.312452 | -0.449079 |
| H | -5.513942 | -1.361019 | 0.473281  |
| H | -3.385701 | -3.293209 | -0.470066 |
| C | -2.690056 | -0.406743 | 0.026828  |
| C | -3.645006 | -2.515367 | 0.267165  |
| N | -2.494556 | -1.639833 | 0.491718  |
| H | -3.943909 | -3.015433 | 1.199930  |
| H | -0.851785 | -2.945013 | 0.353937  |
| C | -1.256537 | -2.160659 | 1.014871  |
| H | -0.510423 | -1.359167 | 1.090384  |
| H | -1.412571 | -2.596171 | 2.014352  |
| H | -1.759314 | 3.318676  | 1.399532  |
| H | -1.398102 | 2.009628  | 2.547813  |
| H | -3.014307 | 2.119835  | 1.813627  |



## 21. NMR Spectra

Sample Name:  
SR-IV-295-2  
Data Collected on:  
vnmr13-vnmrs400  
Archive directory:  
Sample directory:  
FidFile: PROTON

Pulse Sequence: PROTON (s2pu1)  
Solvent: cdcl3  
Data collected on: Nov 26 2014

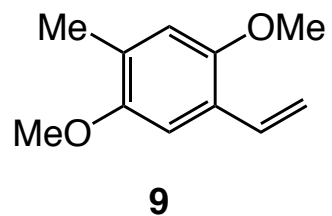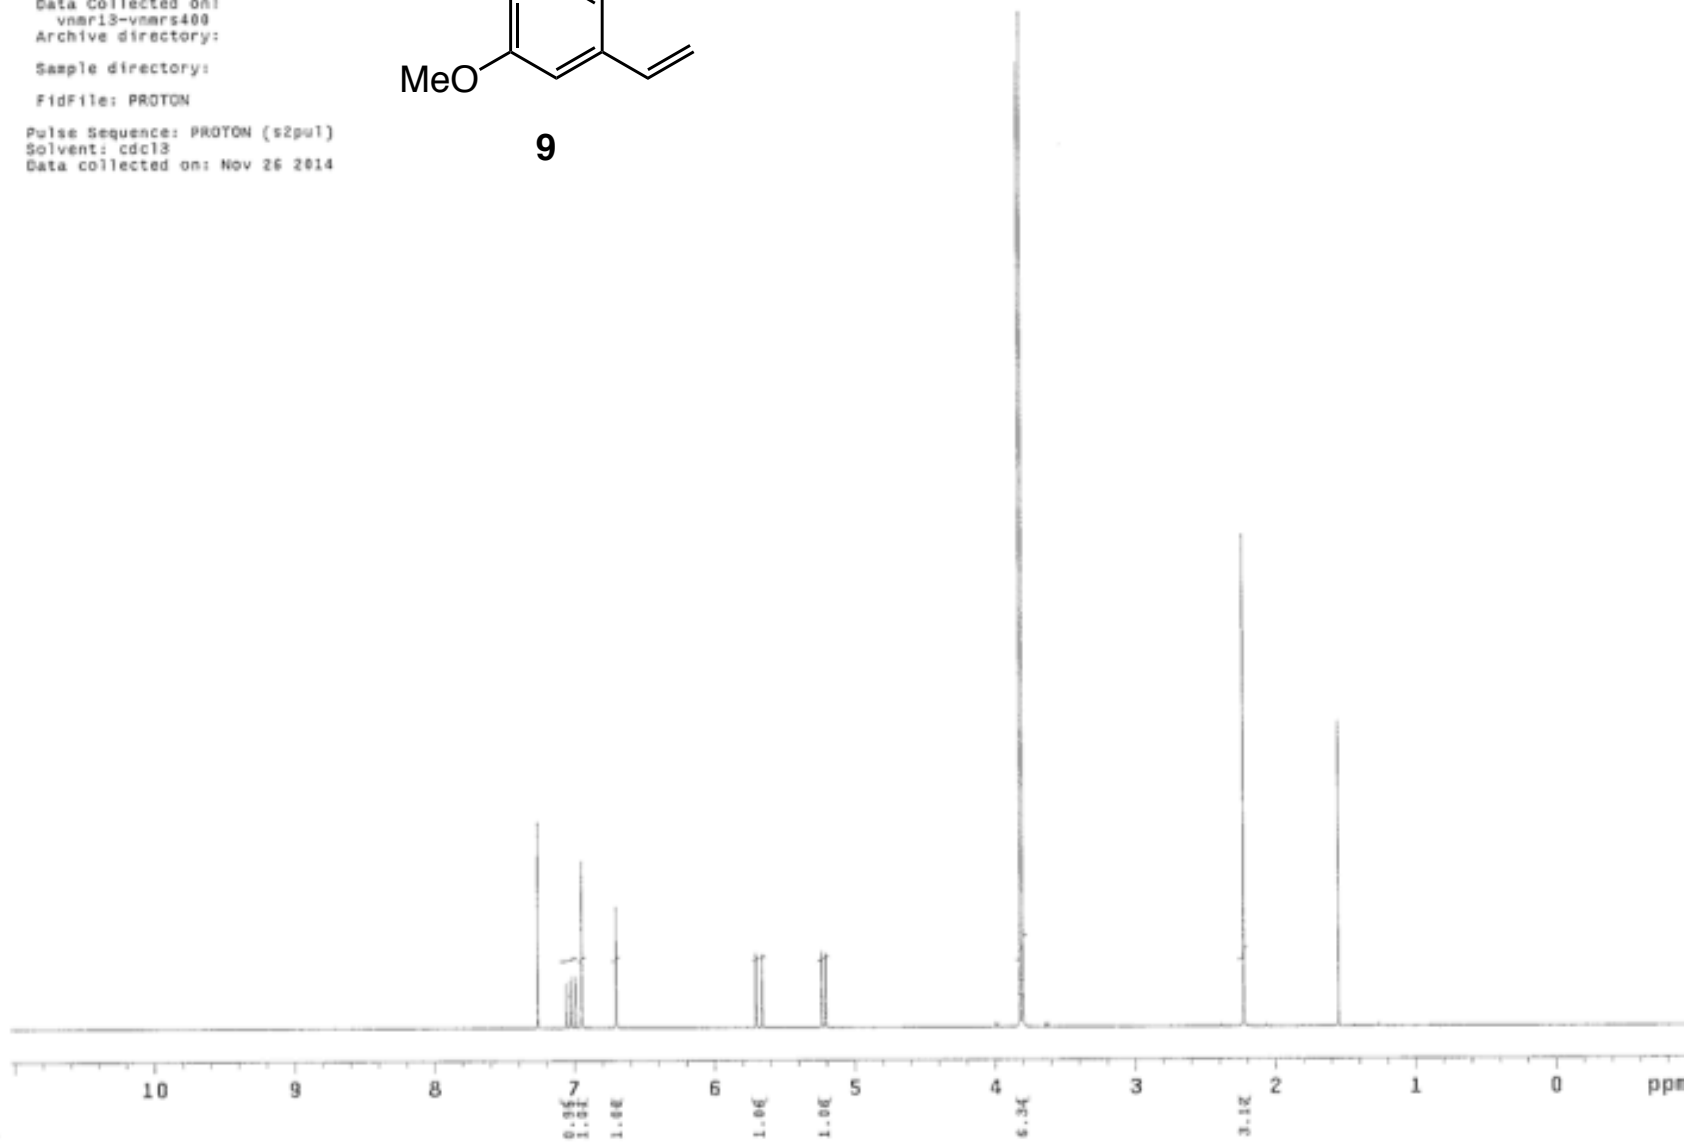

Sample Name:  
SR-IV-236-carbon  
Data Collected on:  
vnmr13-vnmrs480  
Archive directory:  
Sample directory:  
Fidfile: CARBON  
Pulse Sequence: CARBON (s2pu1)  
Solvent: cdcl3  
Data collected on: Nov 5 2014

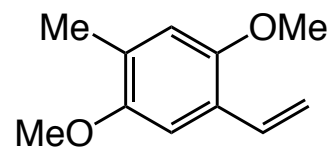

9

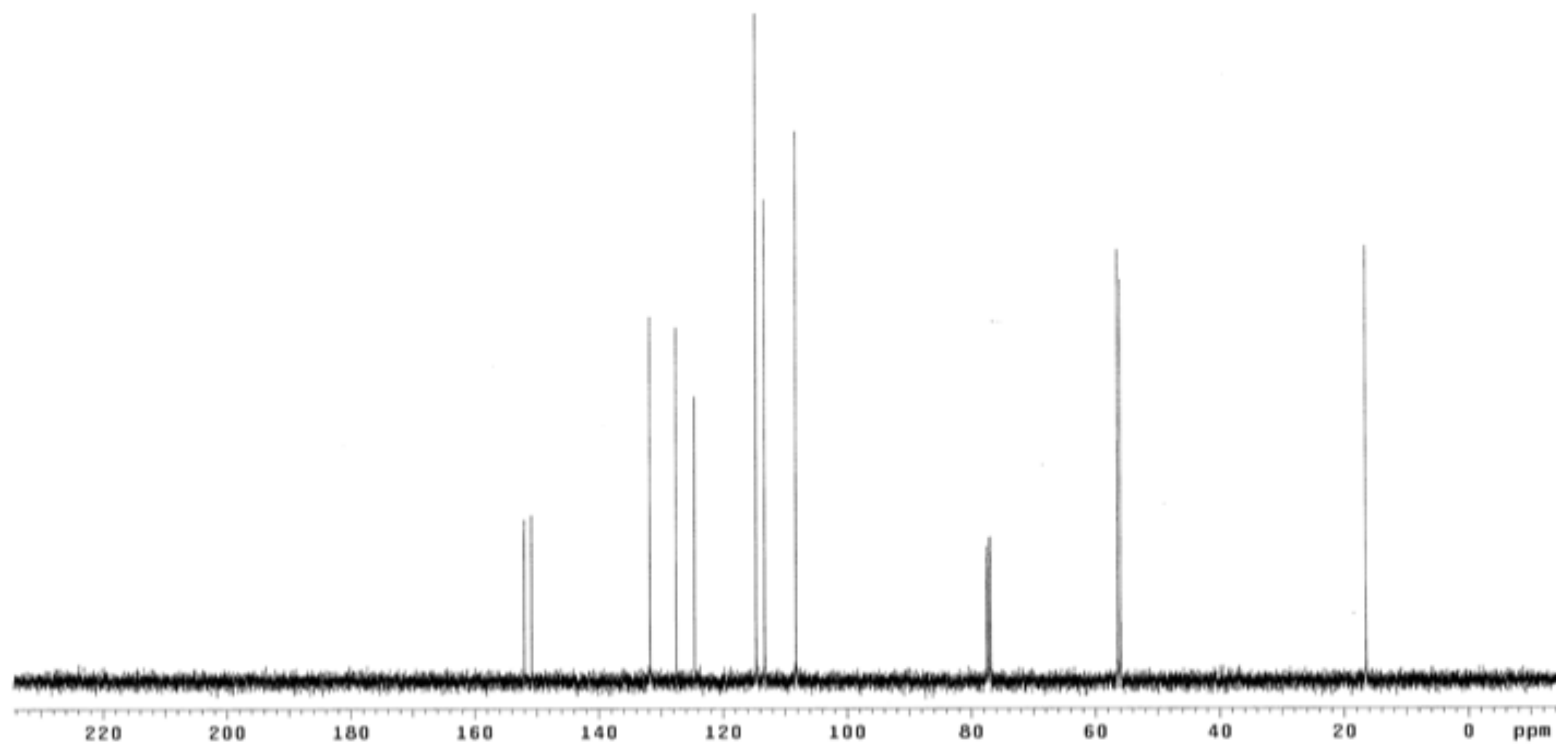

Sample Name:  
SR-V-158  
Data Collected on:  
vnmr13-vnmrs400  
Archive directory:  
Sample directory:  
FidFile: PROTON  
Pulse Sequence: PROTON (s2pu1)  
Solvent: cdcl3  
Data collected on: Aug 5 2015

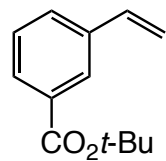

substrate for 2g

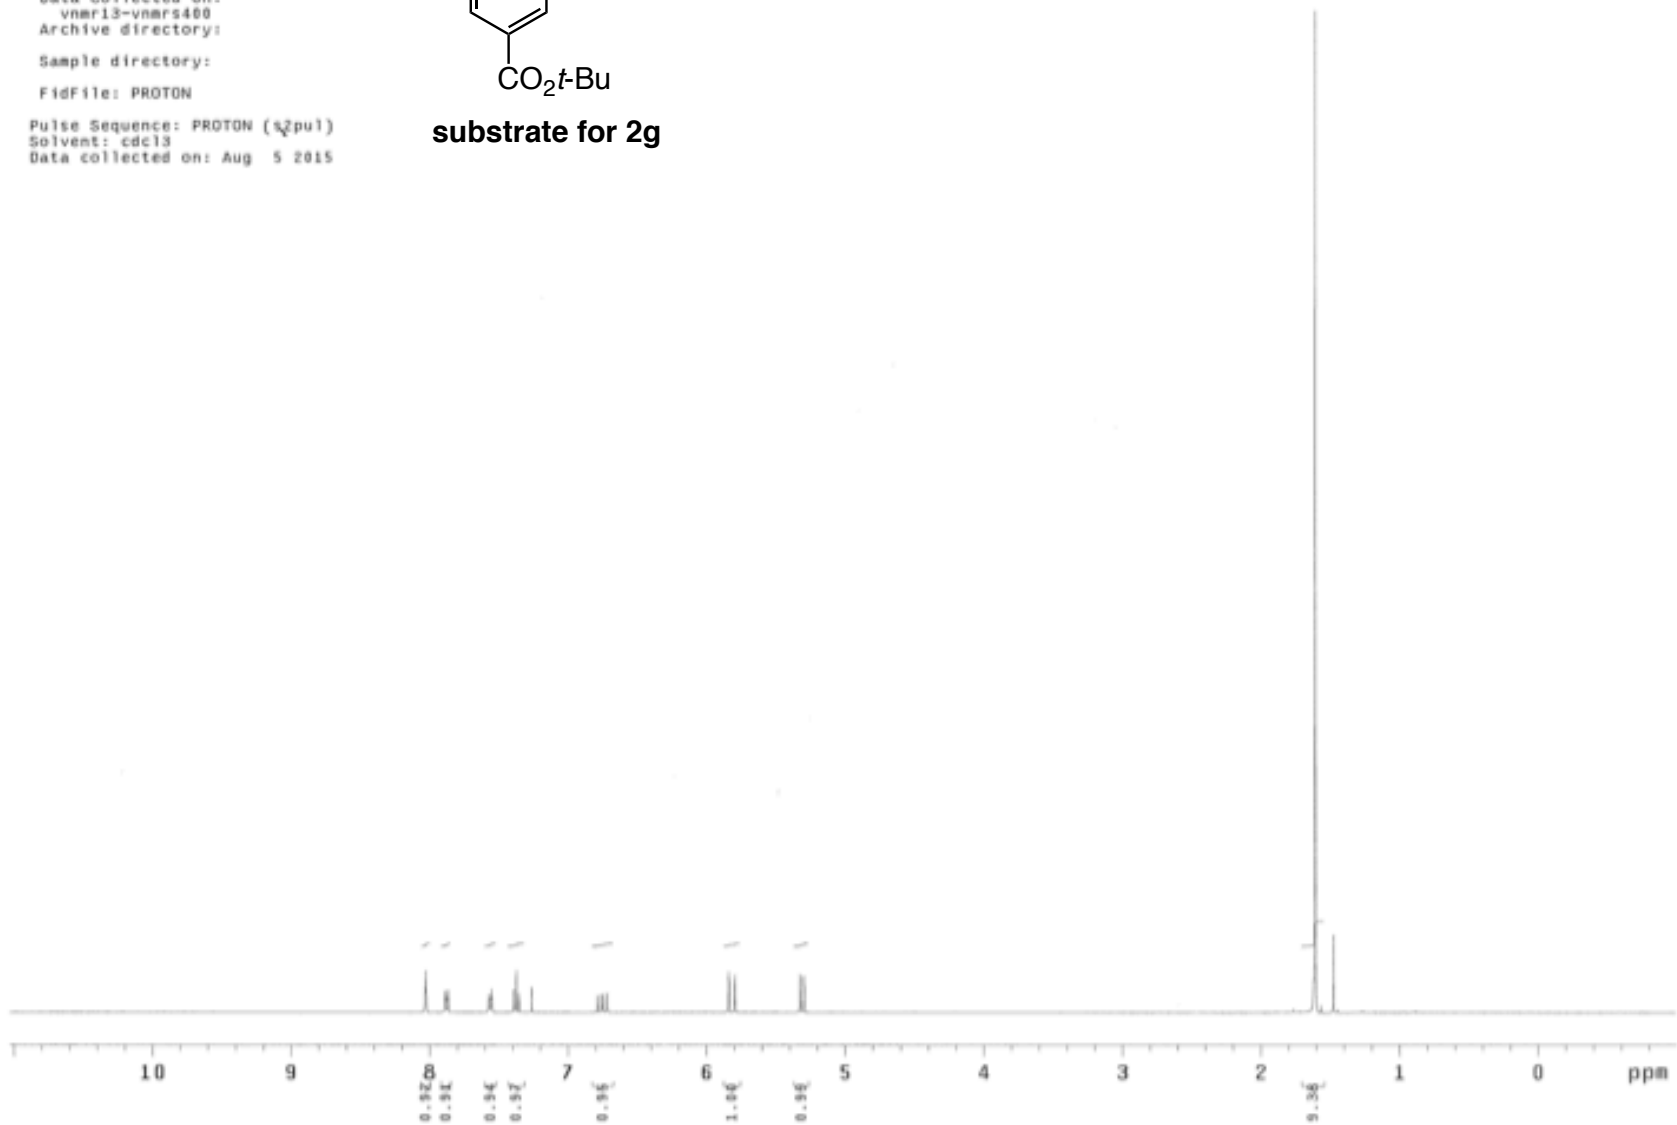

Sample Name:  
SK-V-158-carbon  
Data Collected on:  
vnmr13-vnmrs480  
Archive directory:  
Sample directory:  
Fidfile: CARBON  
Pulse Sequence: CARBON (s2pu1)  
Solvent: cdcl3  
Data collected on: Aug 5 2015

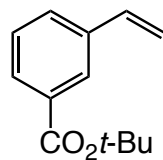

substrate for 2g

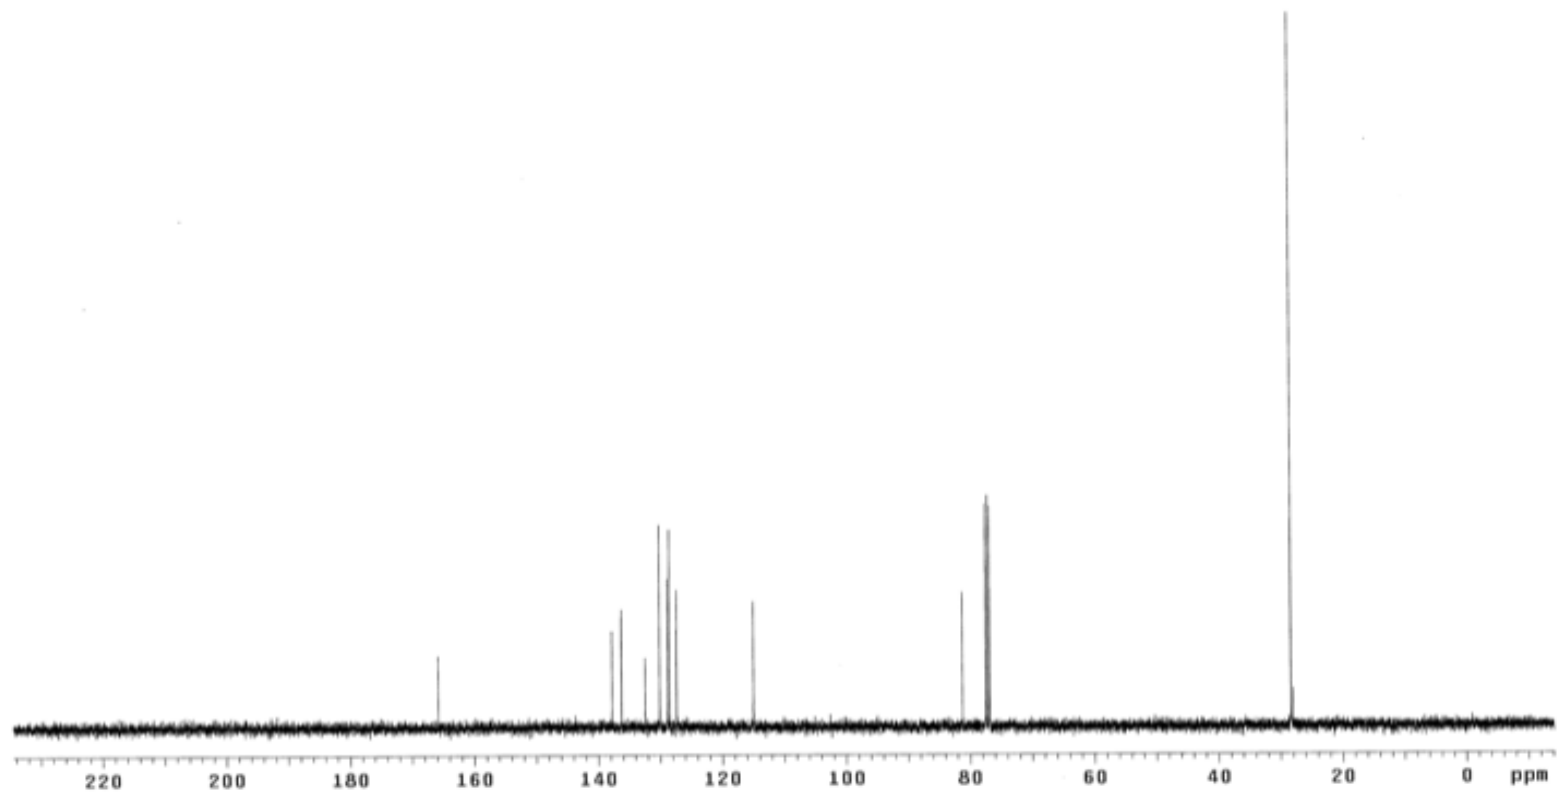

Sample Name:  
SR-V-106  
Data Collected on:  
vnmr13-vnmrs480  
Archive directory:  
Sample directory:  
Fidfile: PROTON  
Pulse Sequence: PROTON (s2pul)  
Solvent: cdcl3  
Data collected on: Apr 17 2015

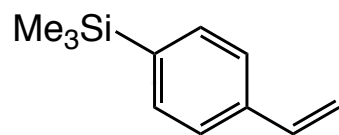

**substrate for 2ad**

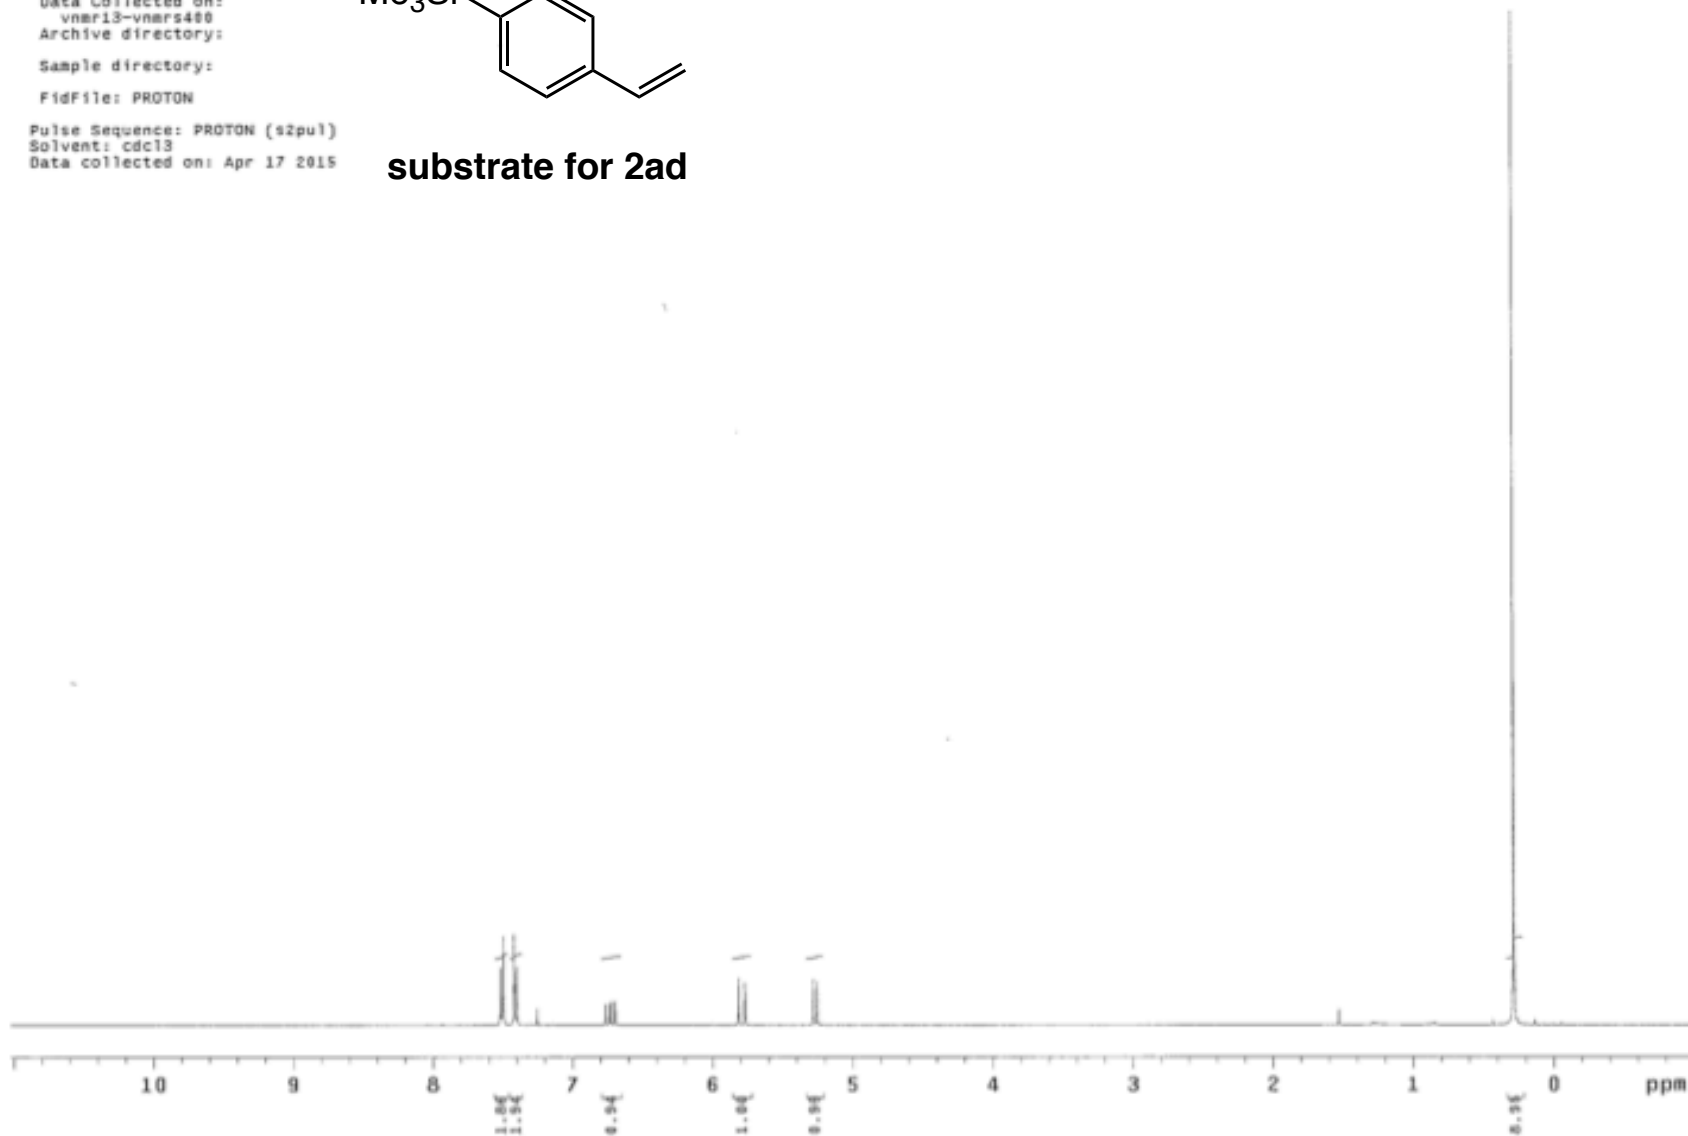

Sample Name:  
SR-V-186-carbon  
Data Collected on:  
vnmr13-vnmrs480  
Archive directory:  
Sample directory:  
FidFile: CARBON  
Pulse Sequence: CARBON (s2pul)  
Solvent: cdcl3  
Data collected on: Apr 17 2015

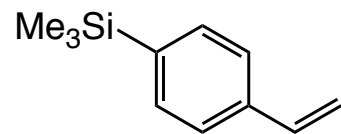

substrate for 2ad

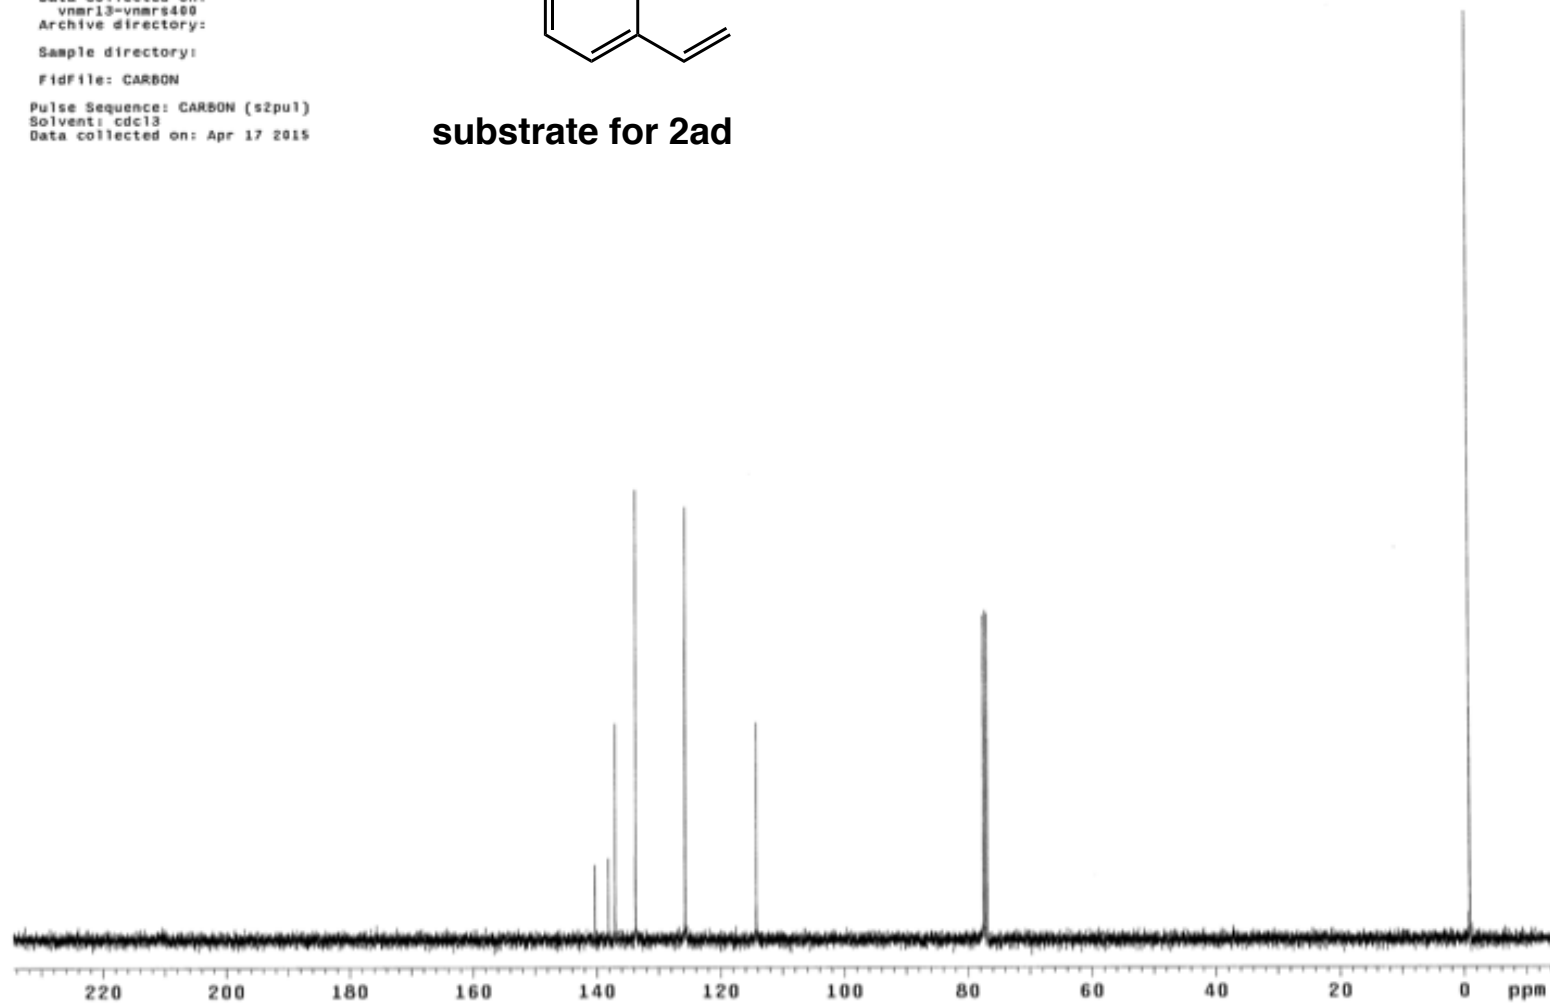

Data Collected on:  
nmr14-vnars488  
Archive directory:  
Sample directory:  
FidFile: PROTON  
Pulse Sequence: PROTON (s2pu1)  
Solvent: cdcl3  
Data collected on: Apr 6 2015

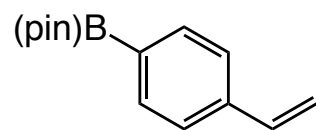

substrate for 2j

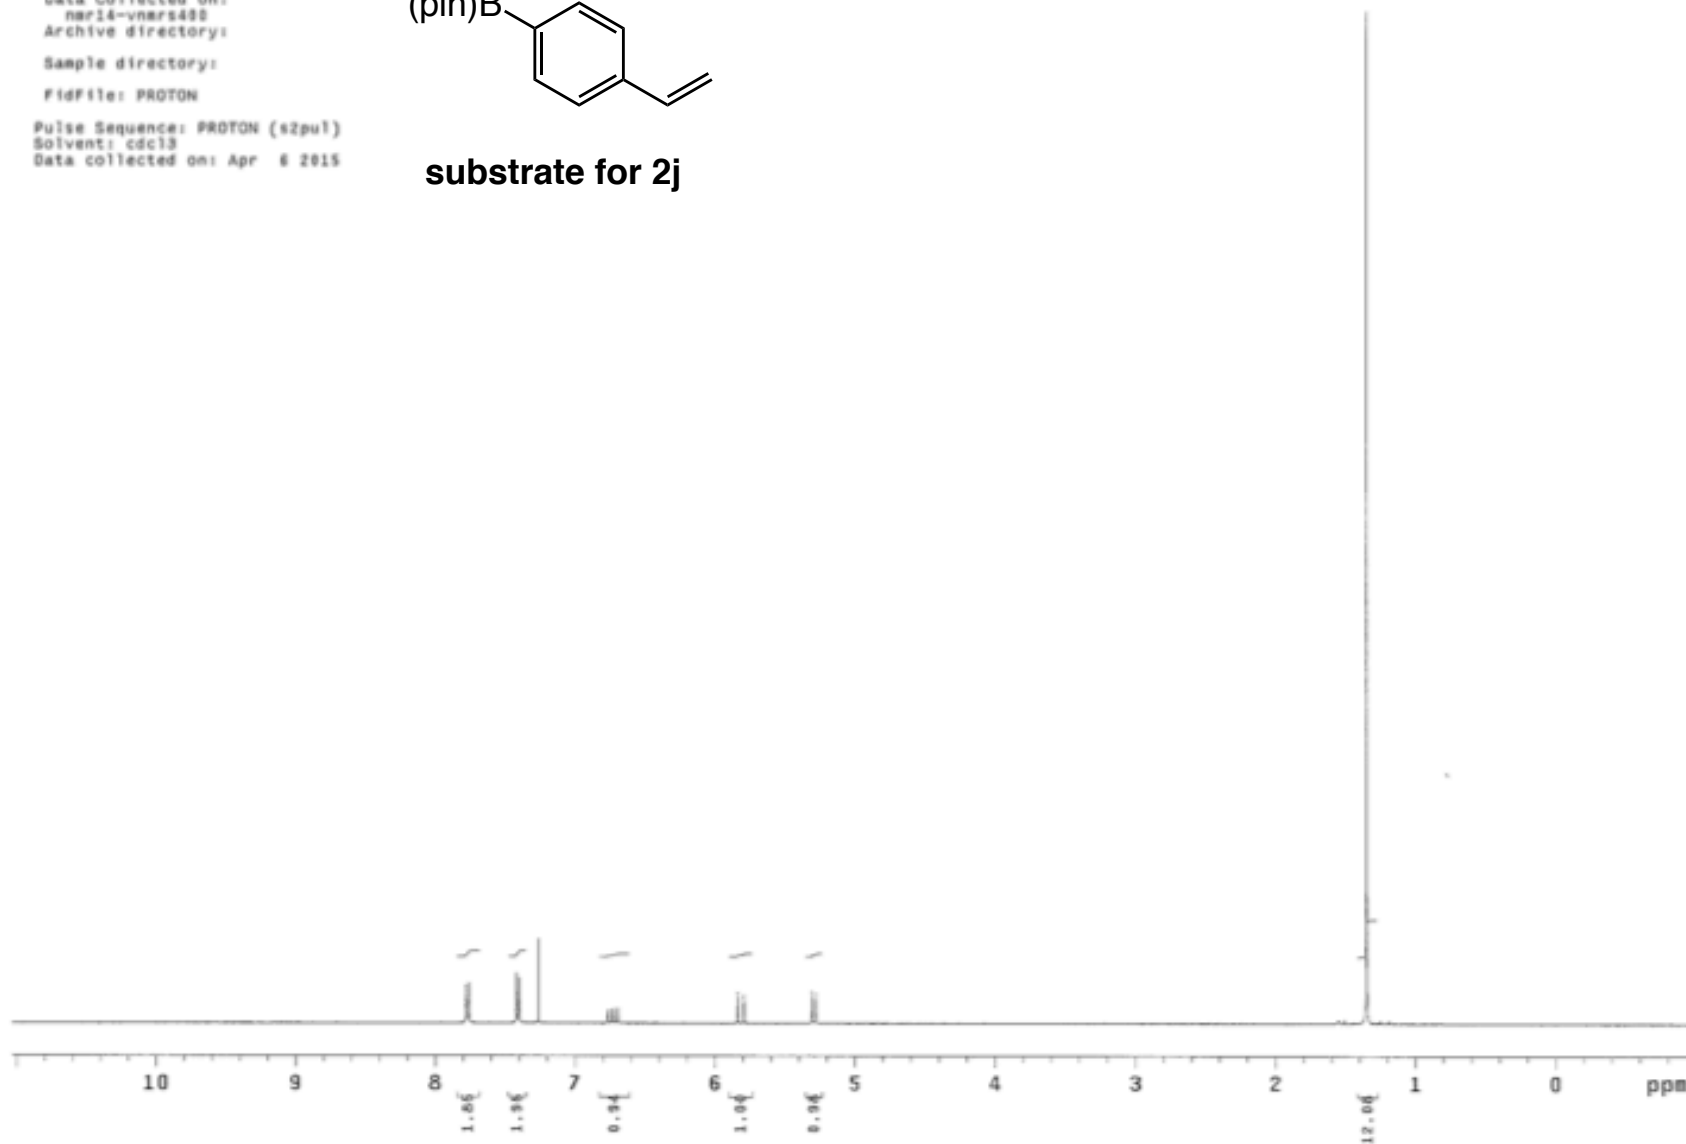

Sample Name:  
SR-V-98-carbon  
Data Collected on:  
mar14-vms400  
Archive directory:  
Sample directory:  
FidFile: CARBON  
Pulse Sequence: CARBON (s2pu1)  
Solvent: cdcl3  
Data collected on: Apr 4 2015

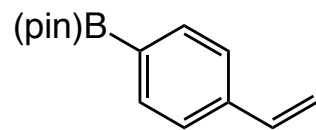

substrate for 2j

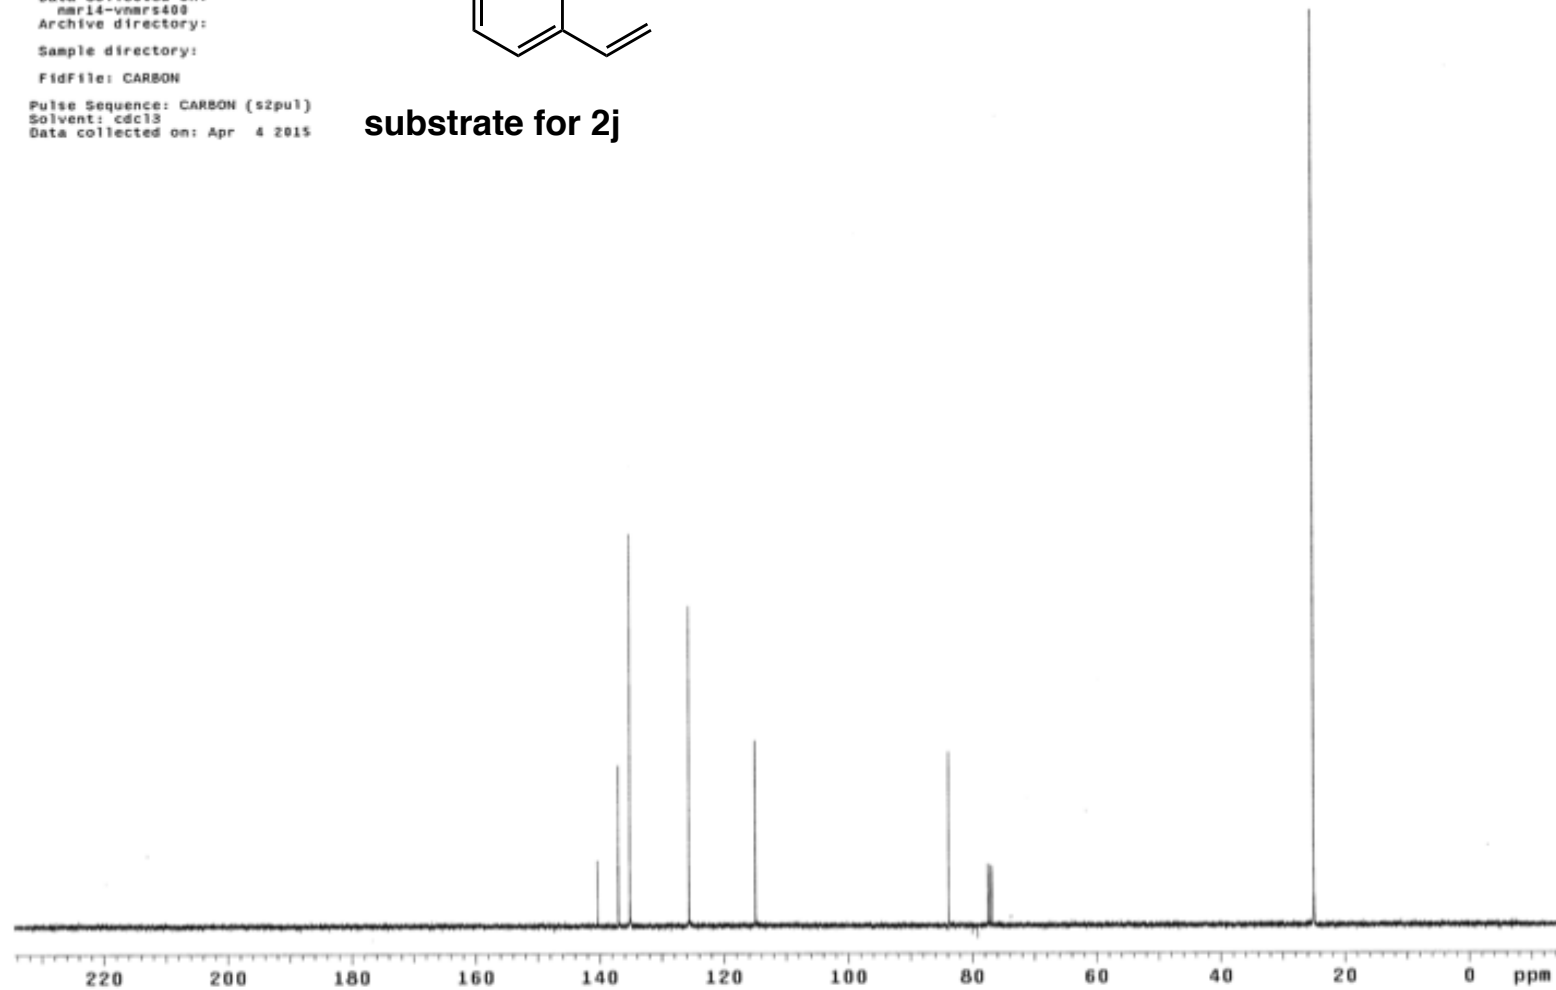



Sample Name:  
SK-V-125  
Data Collected on:  
vner13-vners400  
Archive directory:  
Sample directory:  
Fidfile: PROTON  
Pulse Sequence: PROTON (s2pu1)  
Solvent: cdcl3  
Data collected on: Apr 22 2015

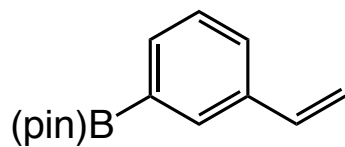

substrate for 2f

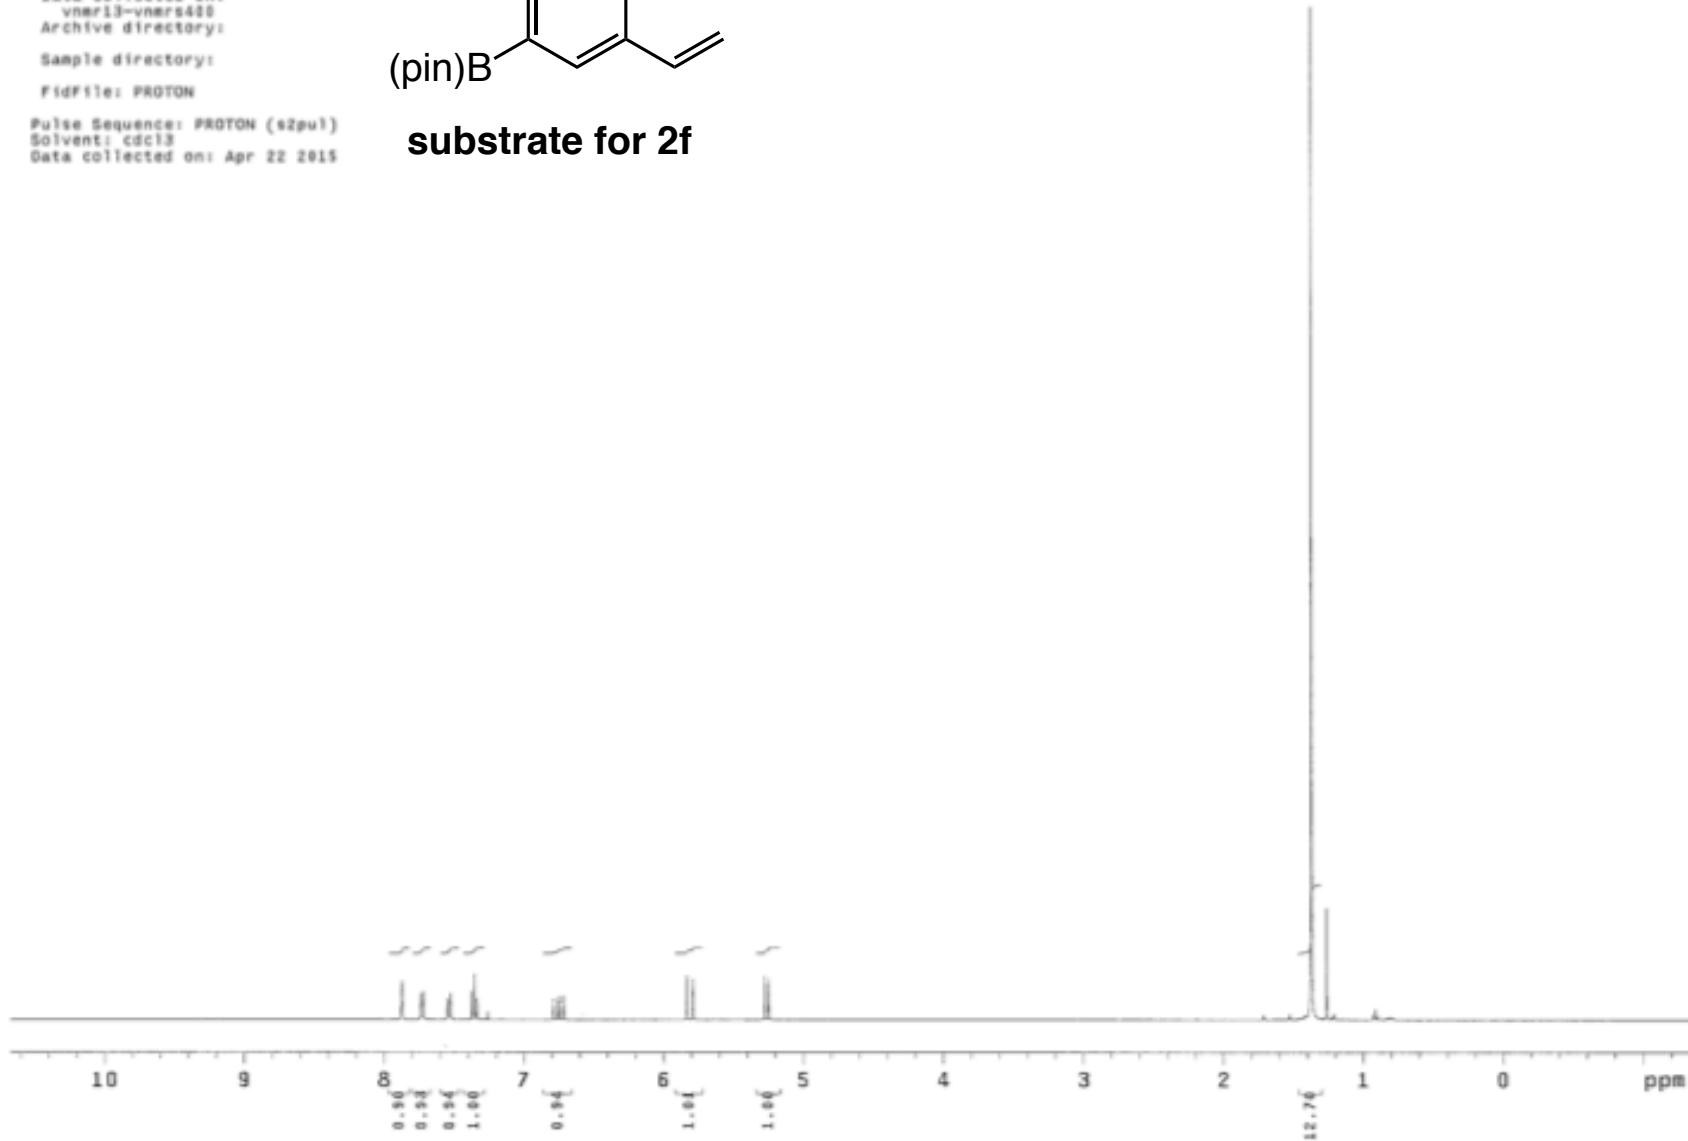

Sample Name:  
SR-V-105-carbon  
Data Collected on:  
vnmr13-vnmr5400  
Archive directory:  
Sample directory:  
FidFile: CARBON  
Pulse Sequence: CARBON (s2pu1)  
Solvent: cdcl3  
Data collected on: Apr 22 2015

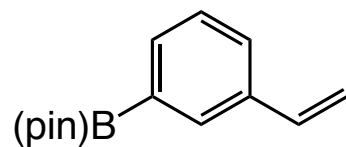

**substrate for 2f**

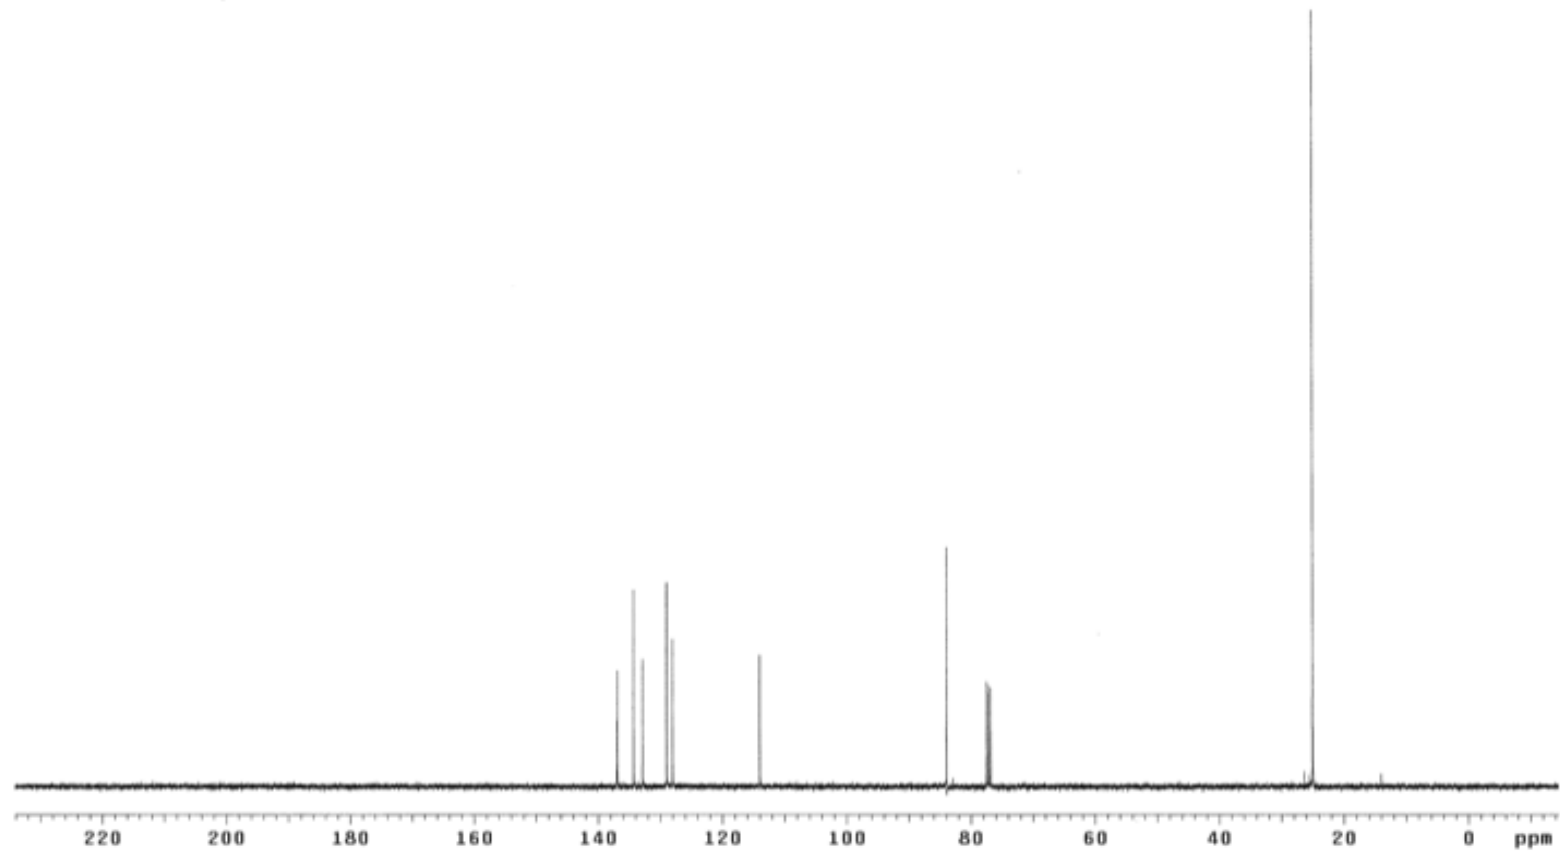

Sample Name:

Data Collected on:  
vnmr13-vnmrs480  
Archive directory:

Sample directory:

FidFile: PROTON

Pulse Sequence: PROTON (s2pu1)  
Solvent: cdcl3  
Data collected on: Oct 27 2014

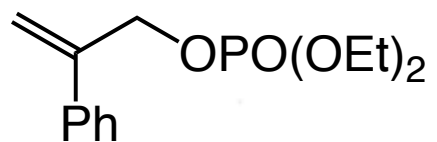

**1b**

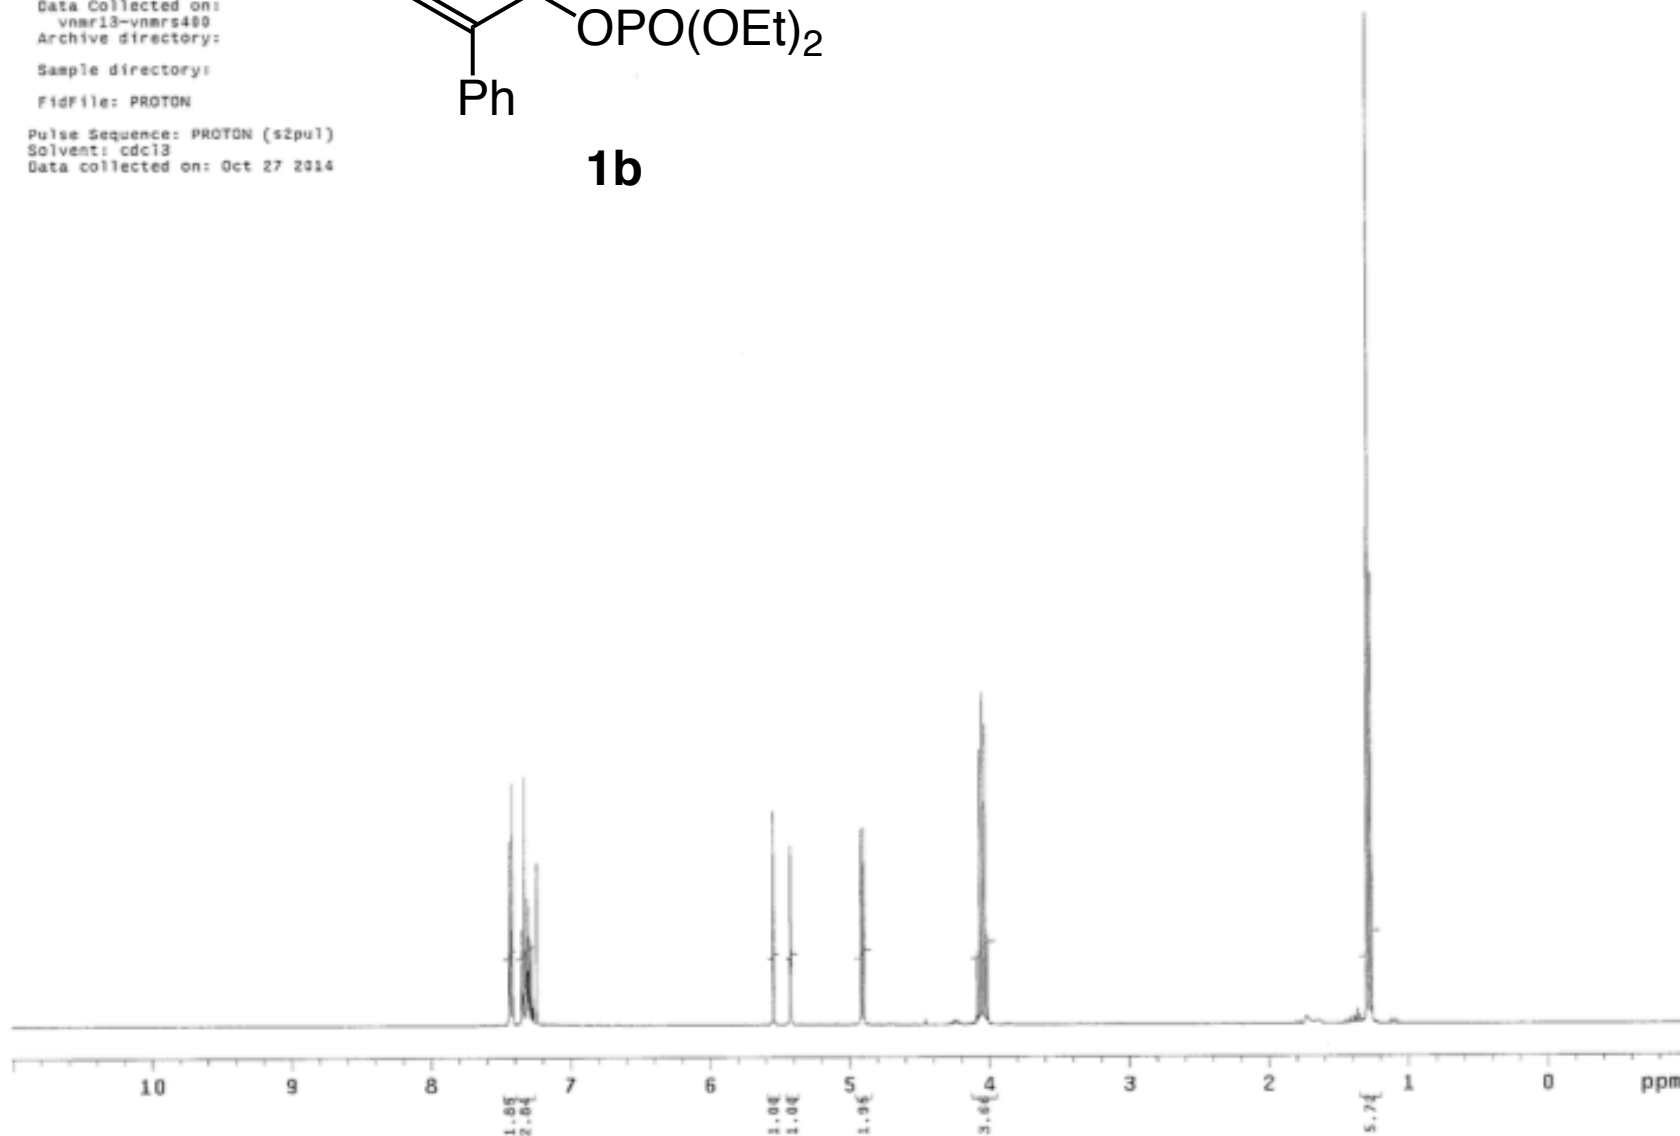

Sample Name:  
SR-IV-289-carbon  
Data Collected on:  
nmr14-vmars480  
Archive directory:  
Sample directory:  
FidFile: CARBON  
Pulse Sequence: CARBON (s2pu1)  
Solvent: cdcl3  
Data collected on: Mar 19 2015

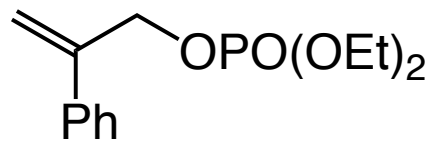

**1b**

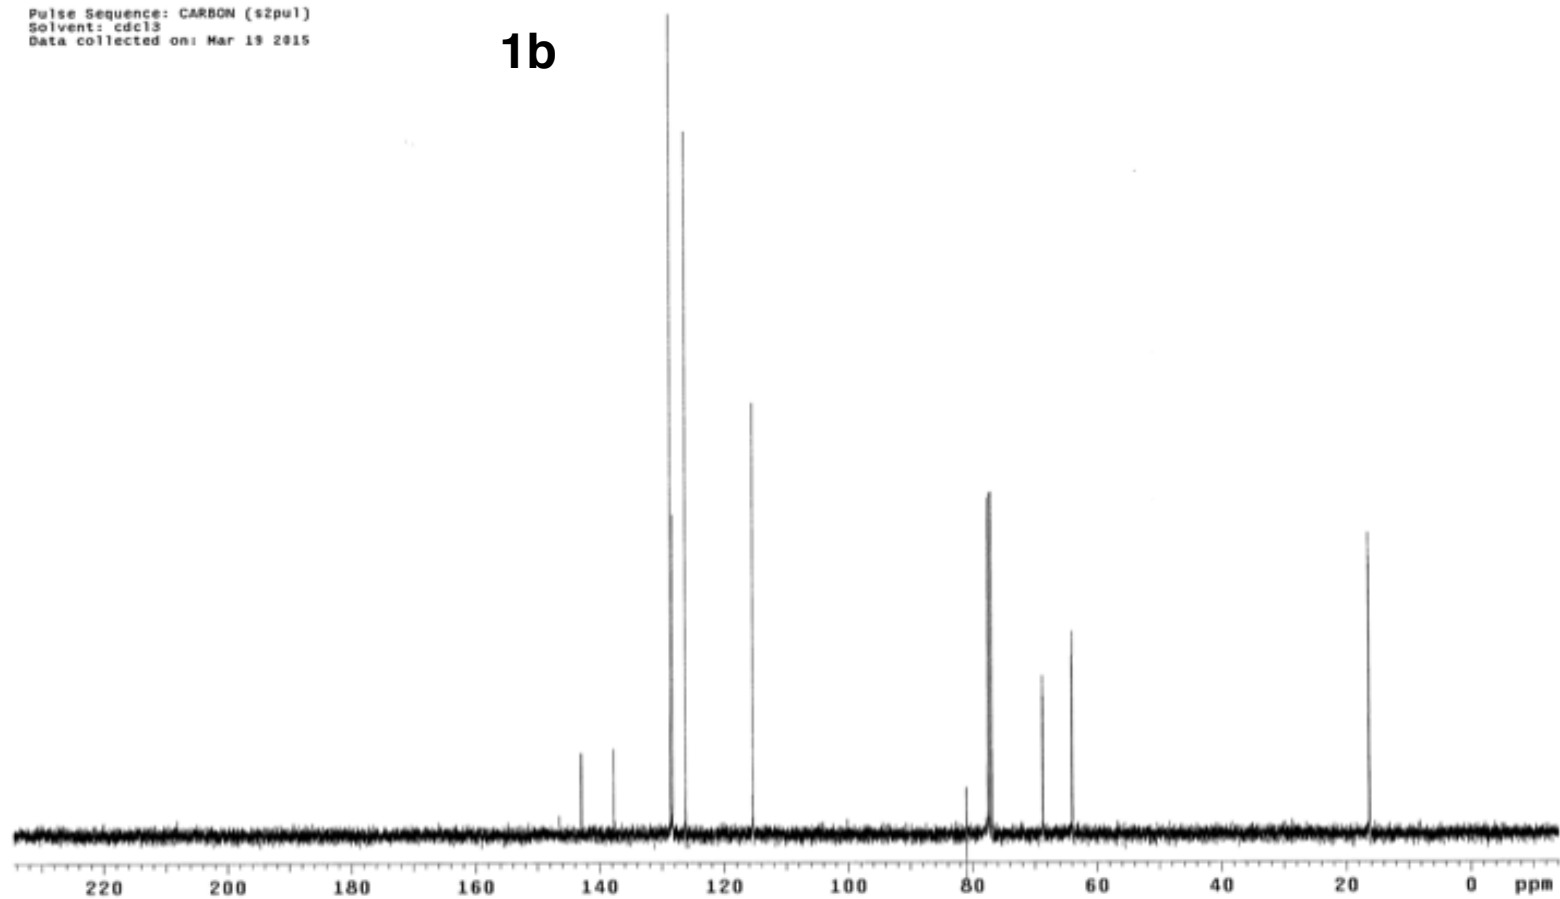

Sample Name:  
SR-IV-274-A  
Data Collected on:  
vnmr13-vnmrs460  
Archive directory:  
Sample directory:  
Fidfile: PRDT0N  
Pulse Sequence: PRDT0N (s2pu1)  
Solvent: cdcl3  
Data collected on: Oct 7 2014

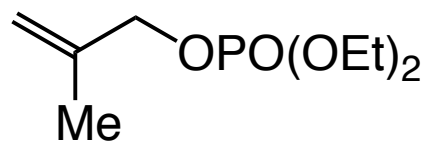

**1c**

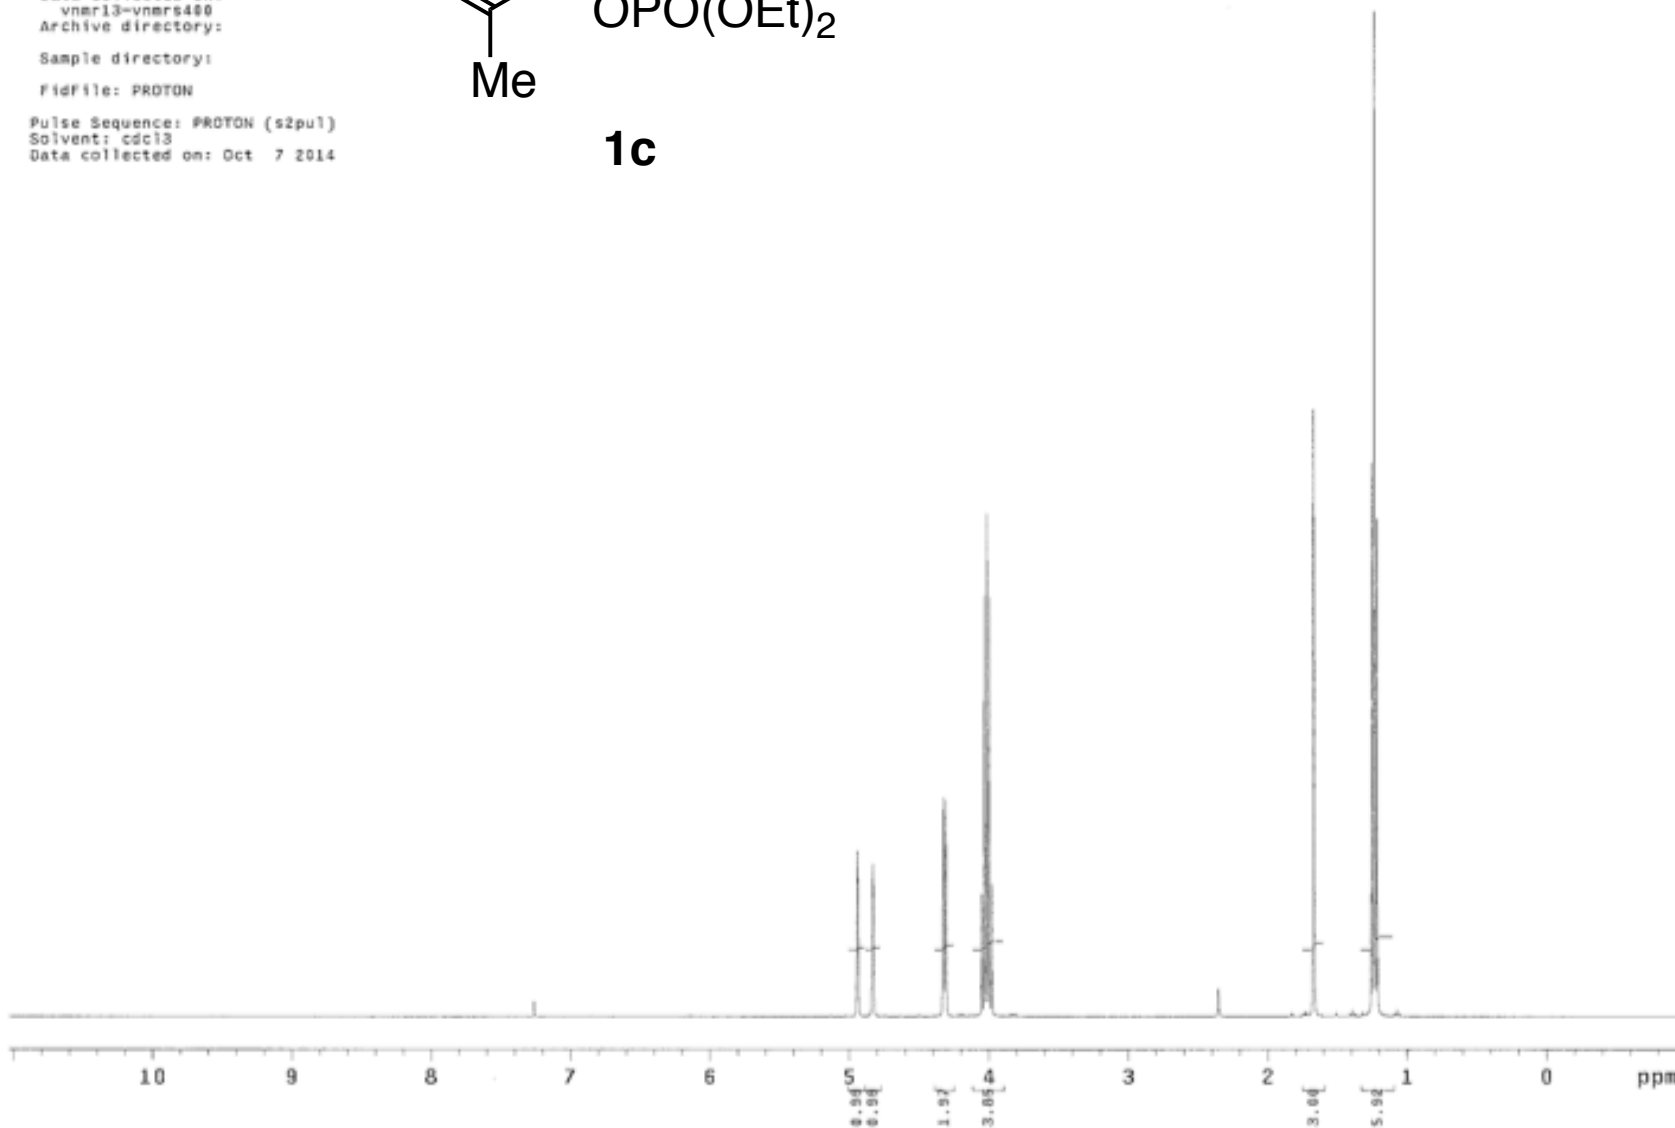

Sample Name:  
SR-IV-274-A-carbon  
Data Collected on:  
vnmr13-vnmrs400  
Archive directory:  
Sample directory:  
FidFile: CARBON  
Pulse Sequence: CARBON (s2pu1)  
Solvent: cdcl3  
Data collected on: Oct 7 2014

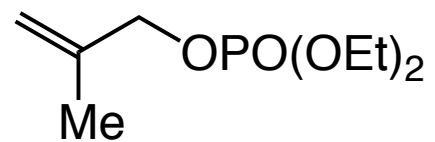

**1c**

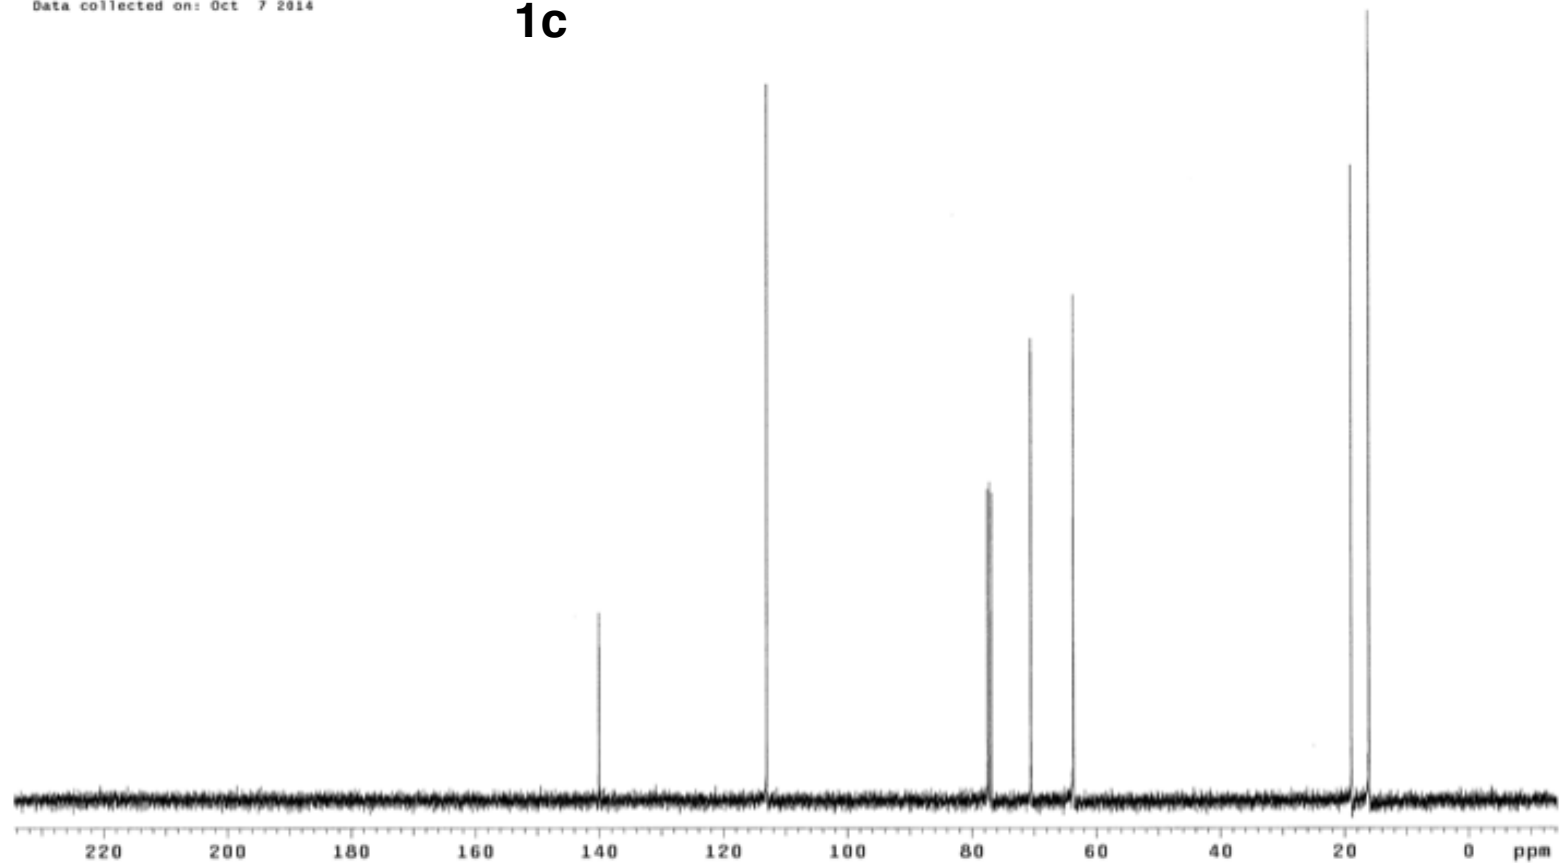

Sample Name:  
SK-V-28-phos  
Data Collected on:  
vnr13-vnr13400  
Archive directory:  
Sample directory:  
Fidfile: PROTON  
Pulse Sequence: PROTON (szpu1)  
Solvent: cdcl3  
Data collected on: Jan 14 2015

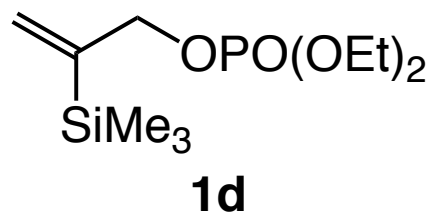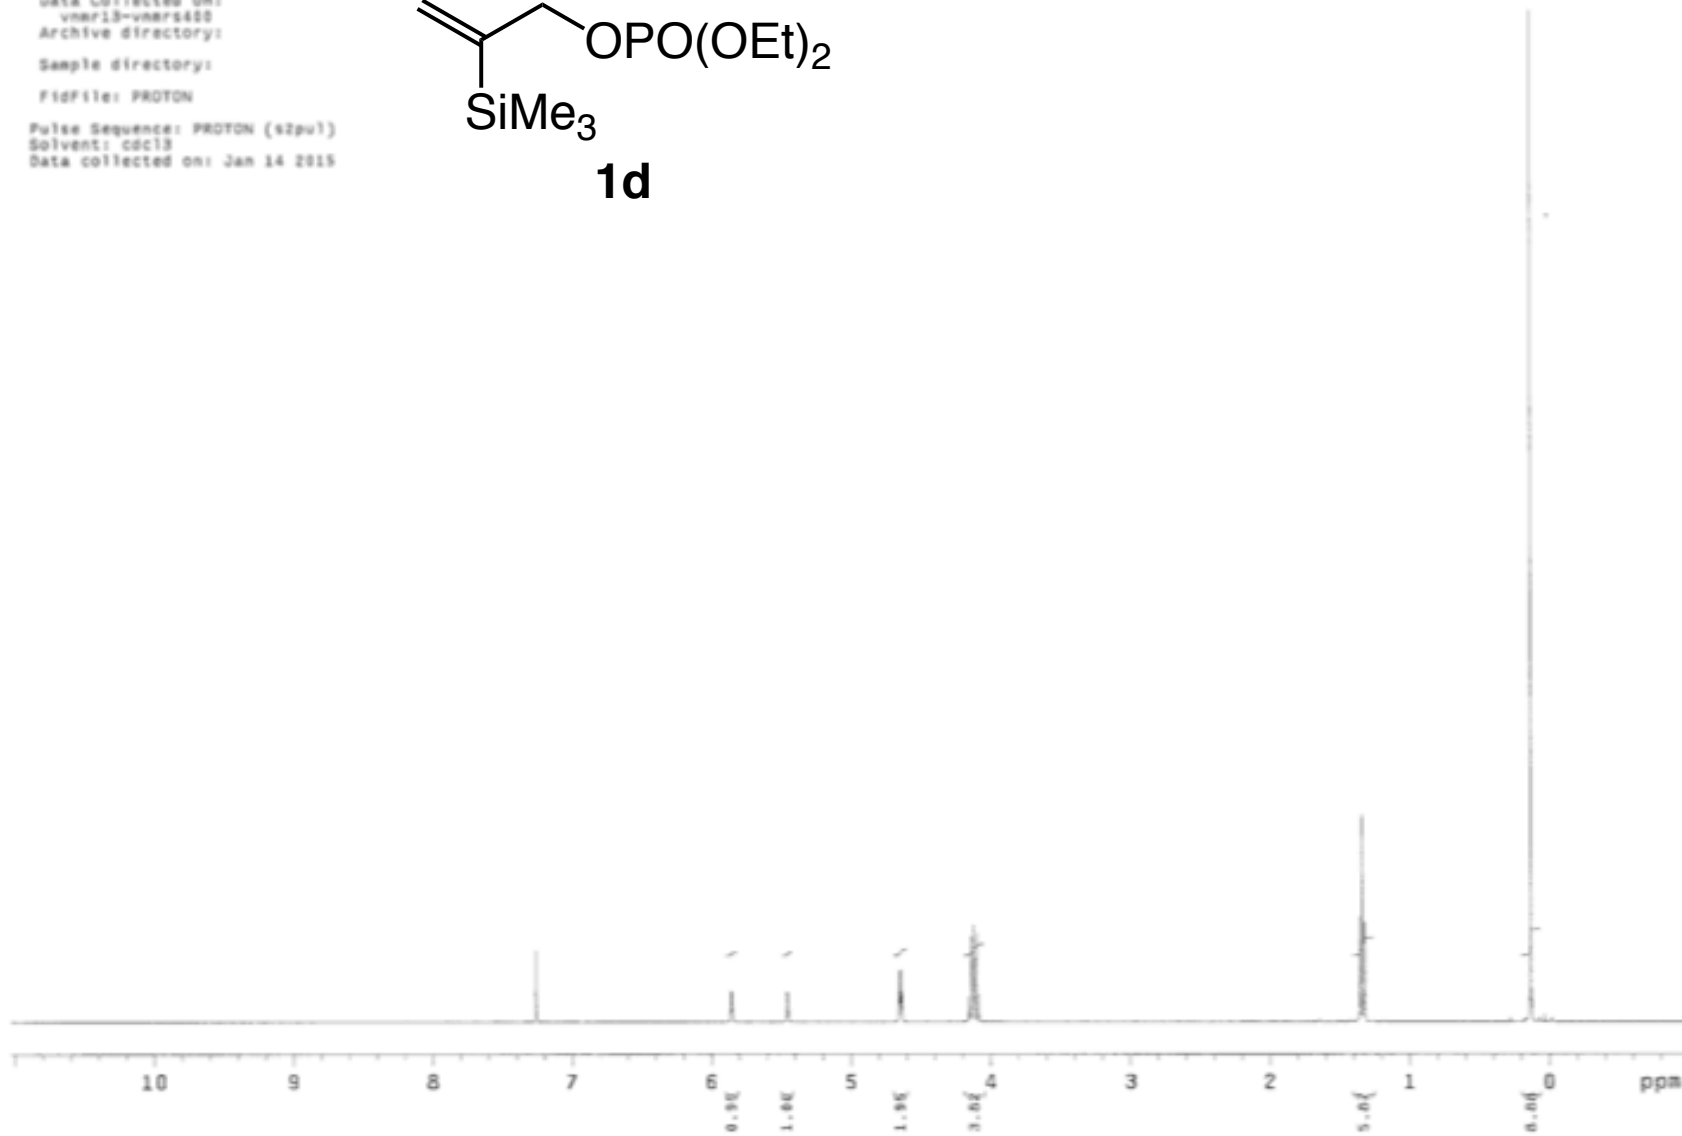

Sample Name: SR-IV-297-phos-carbon  
Data Collected on: vnmr13-vnmrs400  
Archive directory:  
Sample directory:  
FidFile: CARBON  
Pulse Sequence: CARBON (s2pu1)  
Solvent: cdCl3  
Data collected on: Nov 15 2014

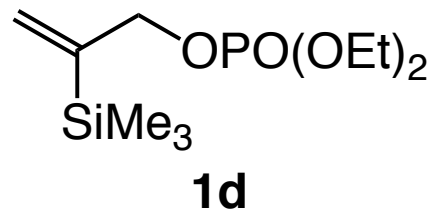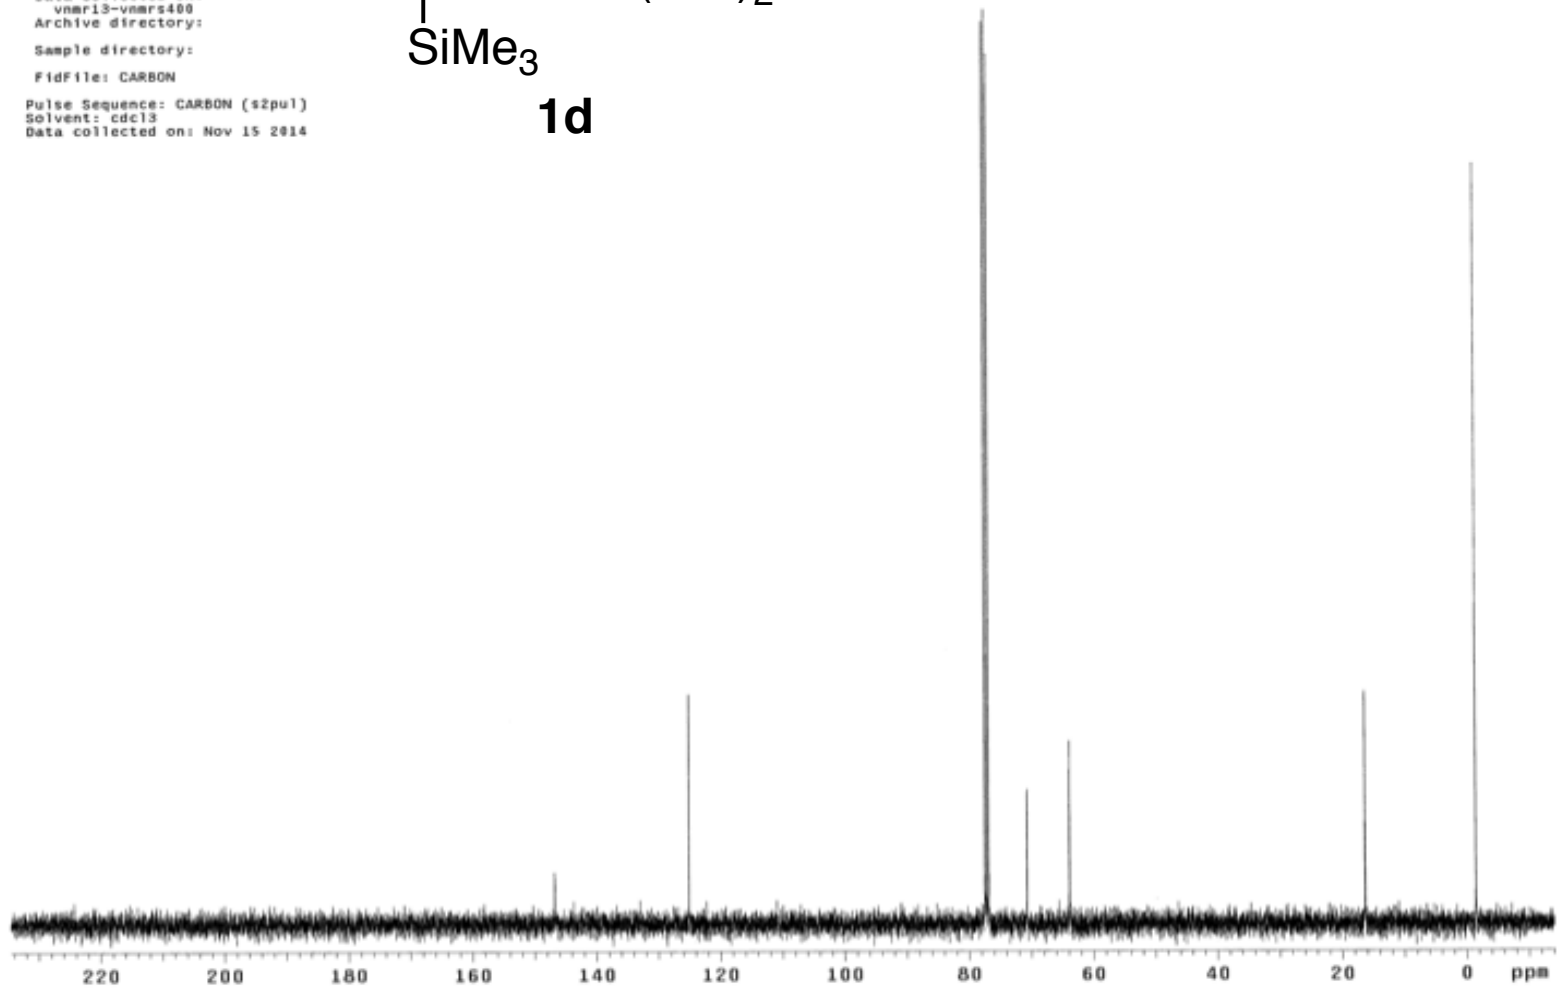



Sample Name: SR-IV-264-A  
Data Collected on: vnr13-vnrs480  
Archive directory:  
Sample directory:  
FidFile: PROTON  
Pulse Sequence: PROTON (szpul)  
Solvent: cdcl3  
Data collected on: Sep 28 2014

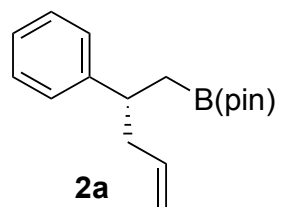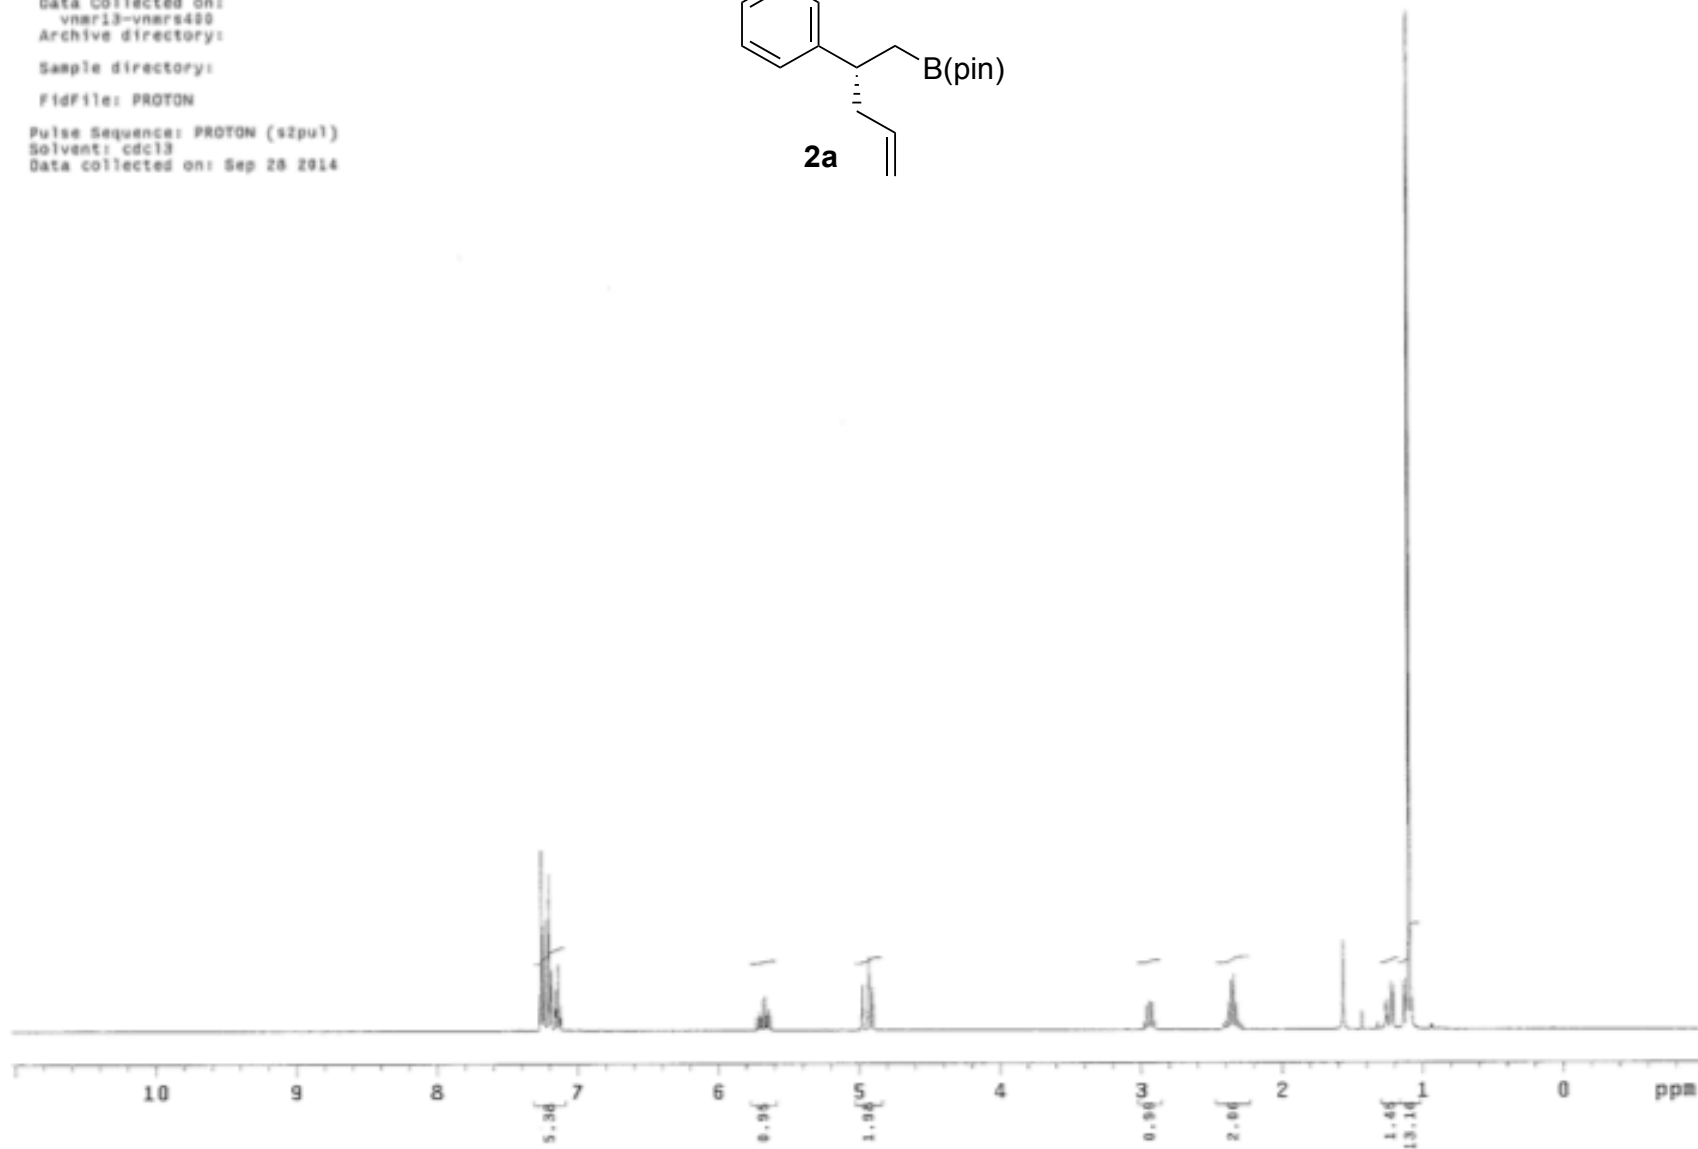

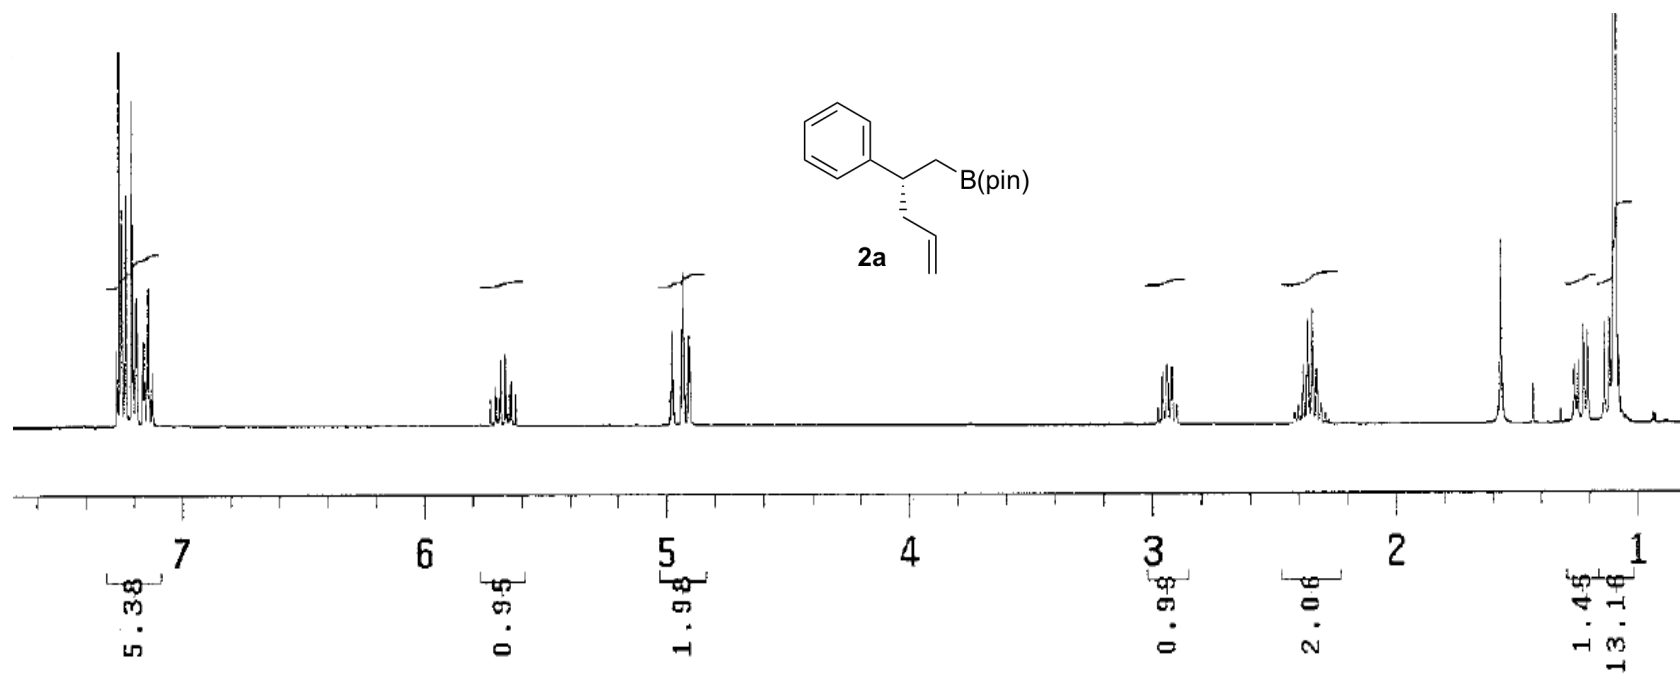

Sample Name:  
SR-IV-264-A-carbon  
Data Collected on:  
vnmr13-vnmrs480  
Archive directory:  
Sample directory:  
FidFile: CARBON  
Pulse Sequence: CARBON (s2pul)  
Solvent: cdcl3  
Data collected on: Sep 28 2014

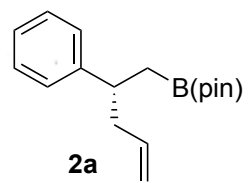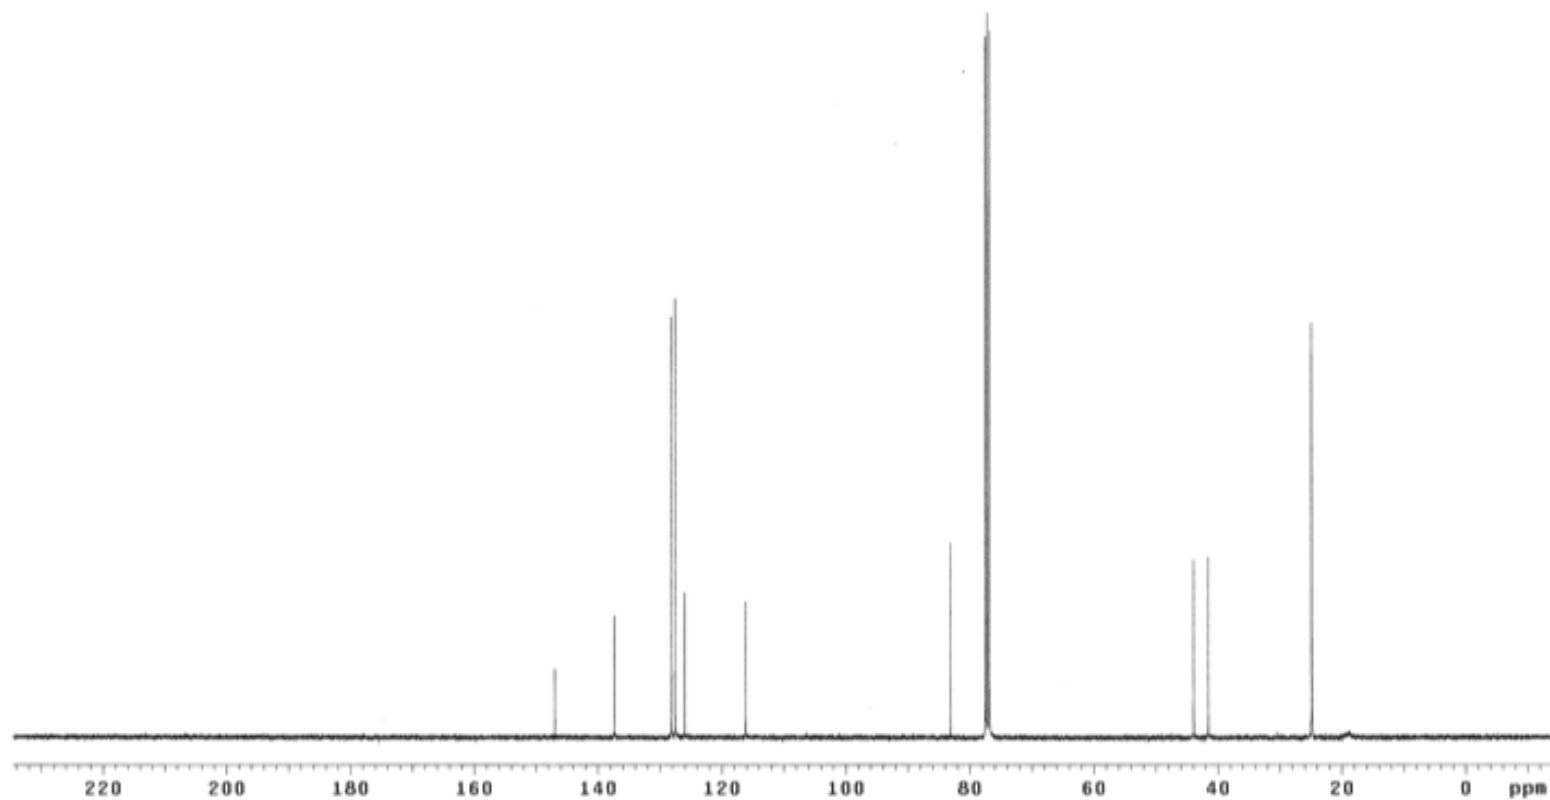

Sample Name:  
SR-IV-263-2  
Data Collected on:  
vnmr13-vnmrs400  
Archive directory:  
Sample directory:  
FidFile: PROTON  
Pulse Sequence: PROTON (s2pu1)  
Solvent: cdcl3  
Data collected on: Sep 25 2014

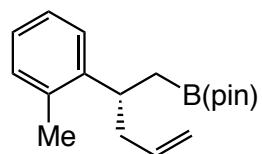

2aa

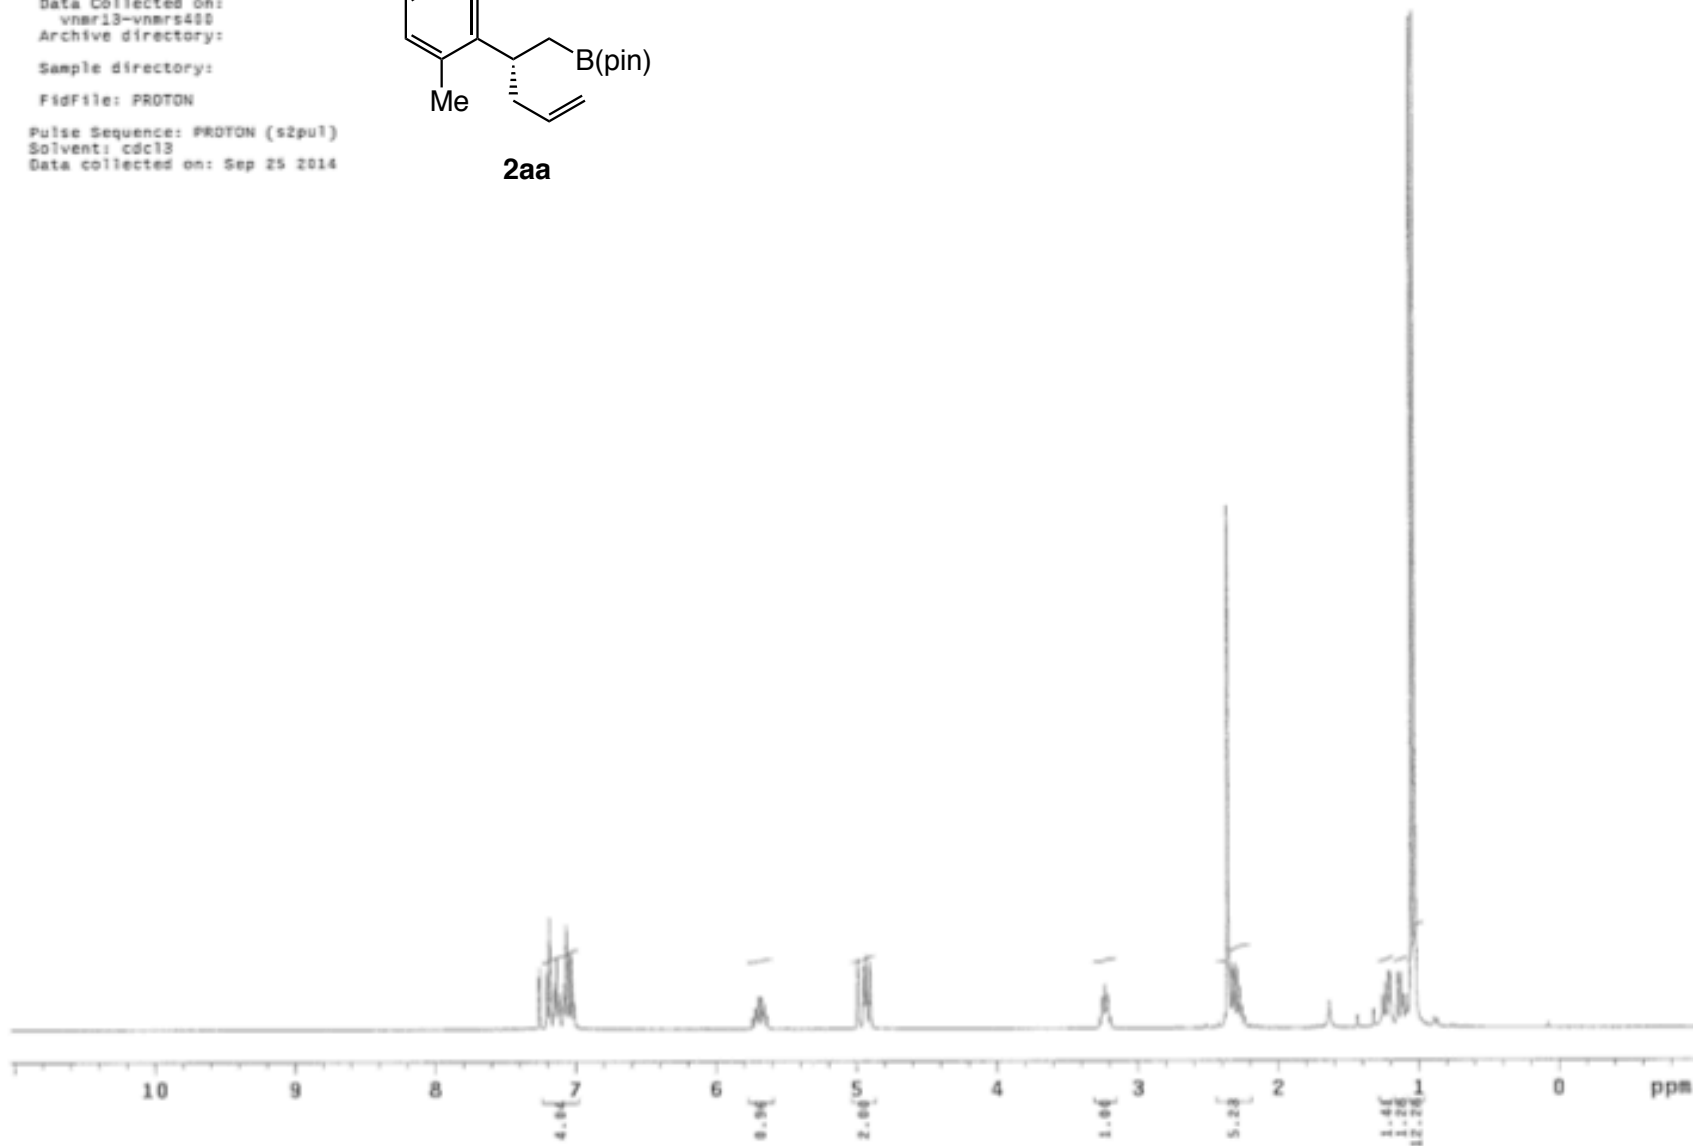

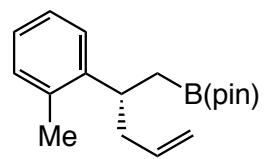

2aa

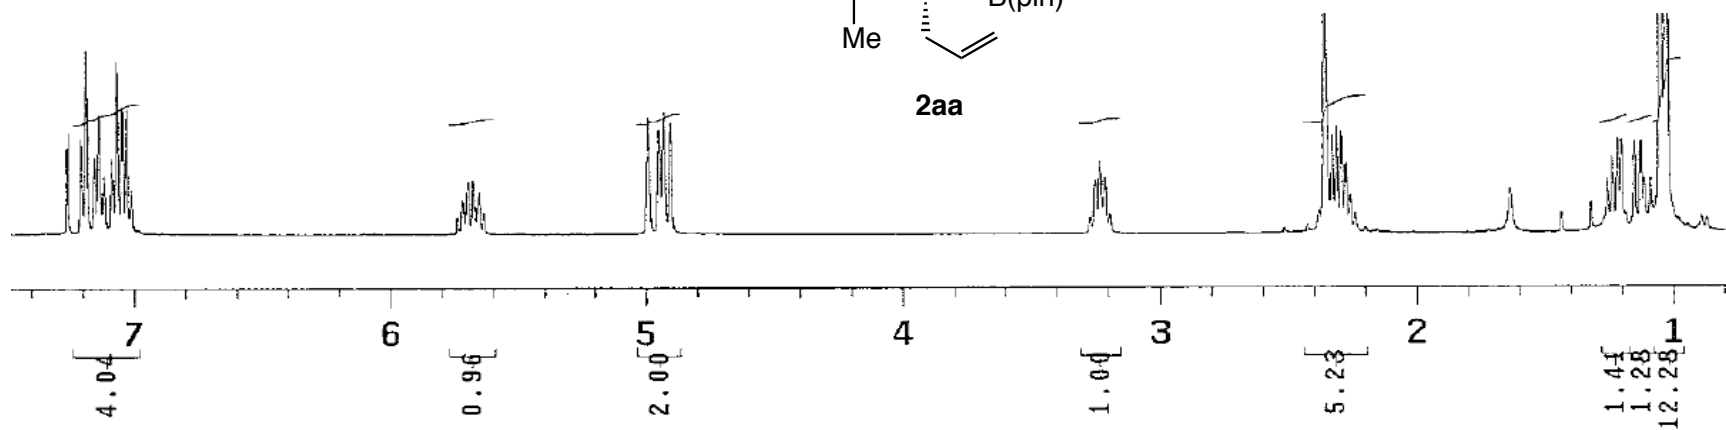

Sample Name:  
SR-IV-263-2-carbon  
Data Collected on:  
vnmr13-vnmrs400  
Archive directory:  
Sample directory:  
FidFile: SR-IV-263-2-carbon  
Pulse Sequence: CARBON (s2pul)  
Solvent: cdcl3  
Data collected on: Sep 26 2014

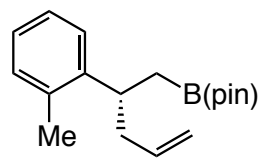

2aa

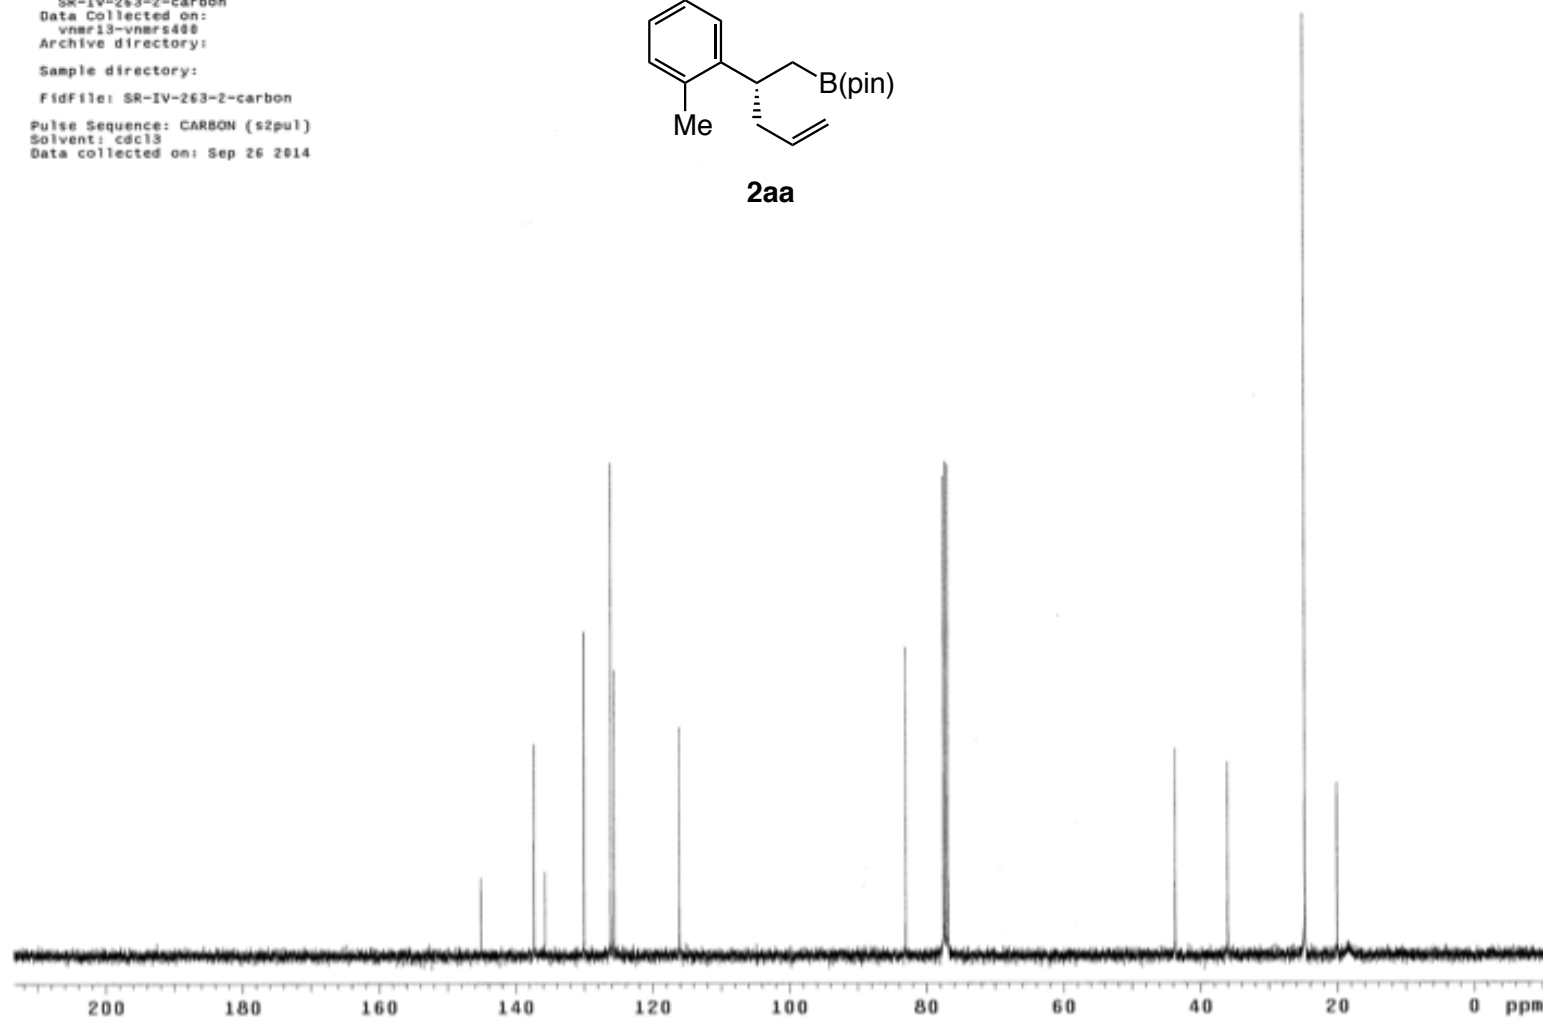

Sample Name: SR-IV-251-B  
 Data Collected on: vnmr13-vnmrs440  
 Archive directory:  
 Sample directory:  
 F1dfile: PROTON  
 Pulse Sequence: PROTON (s2pu1)  
 Solvent: cdcl3  
 Data collected on: Aug 23 2014

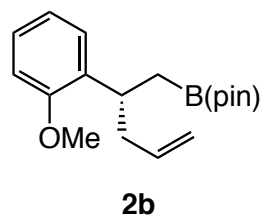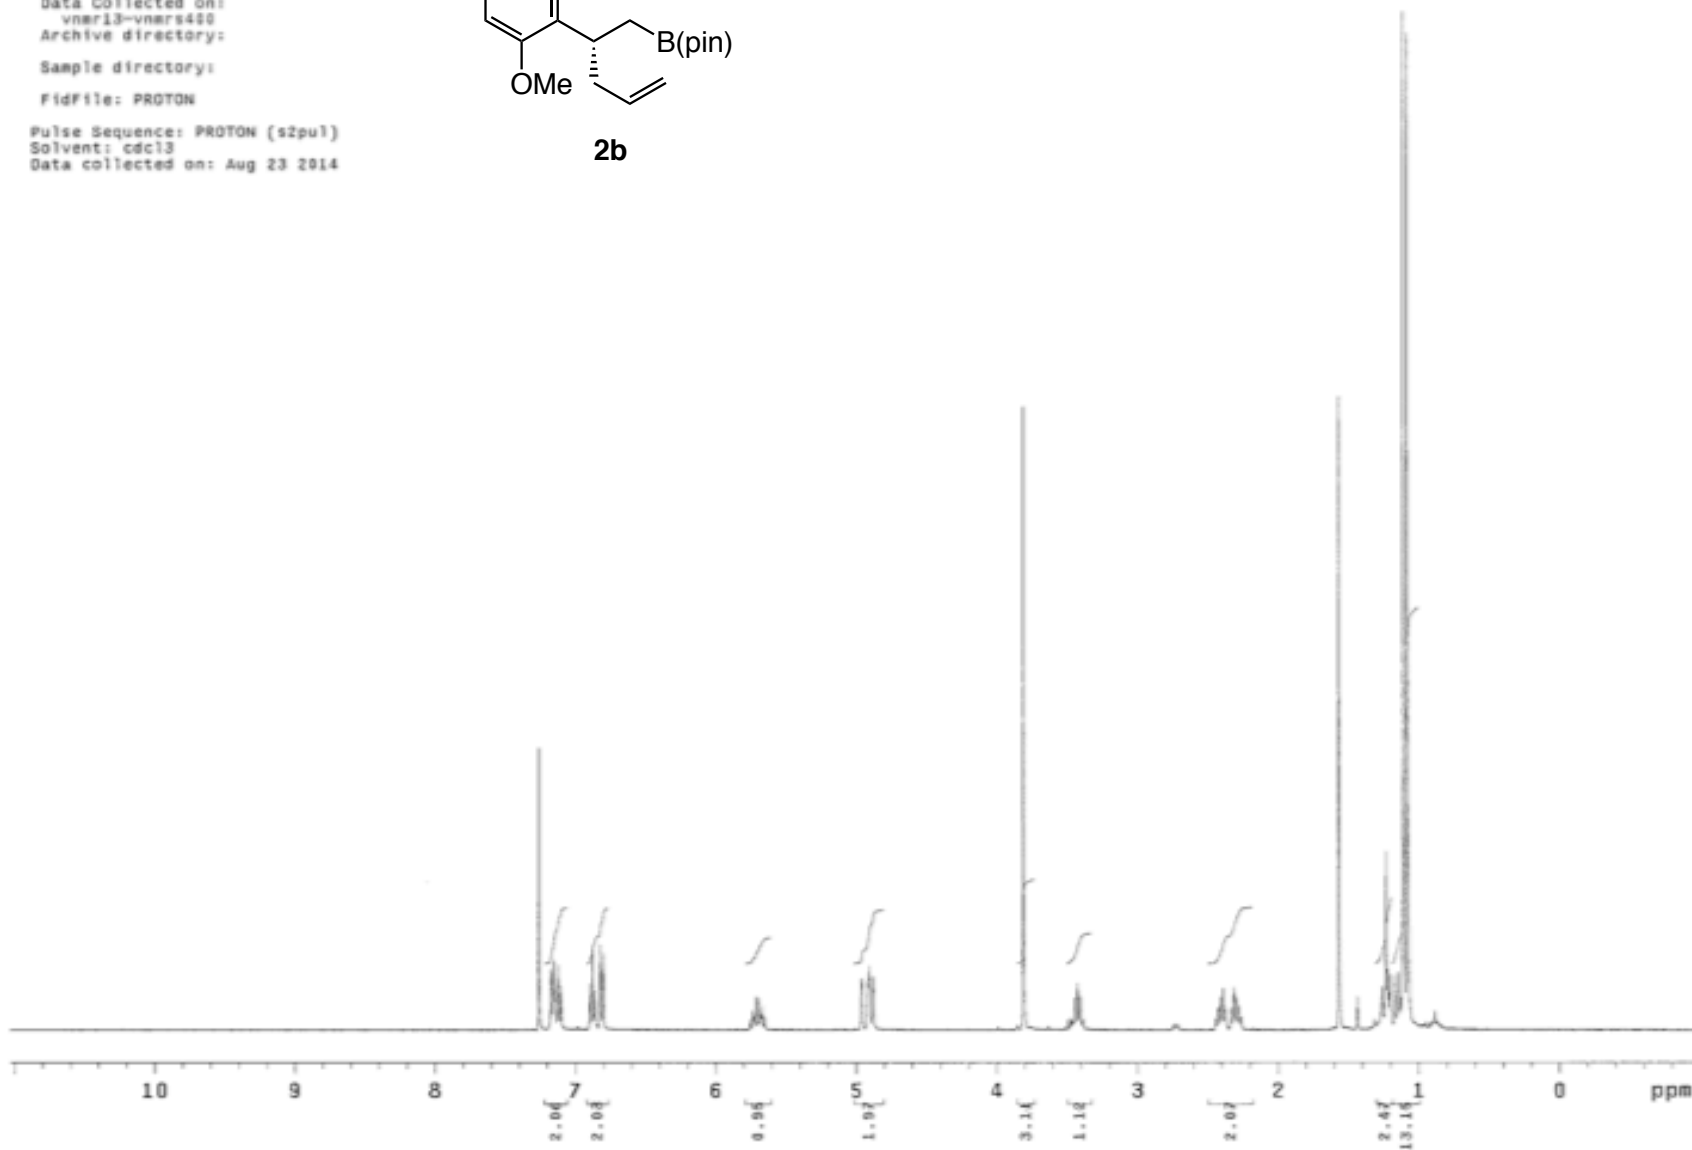

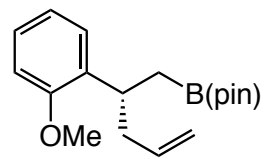

2b

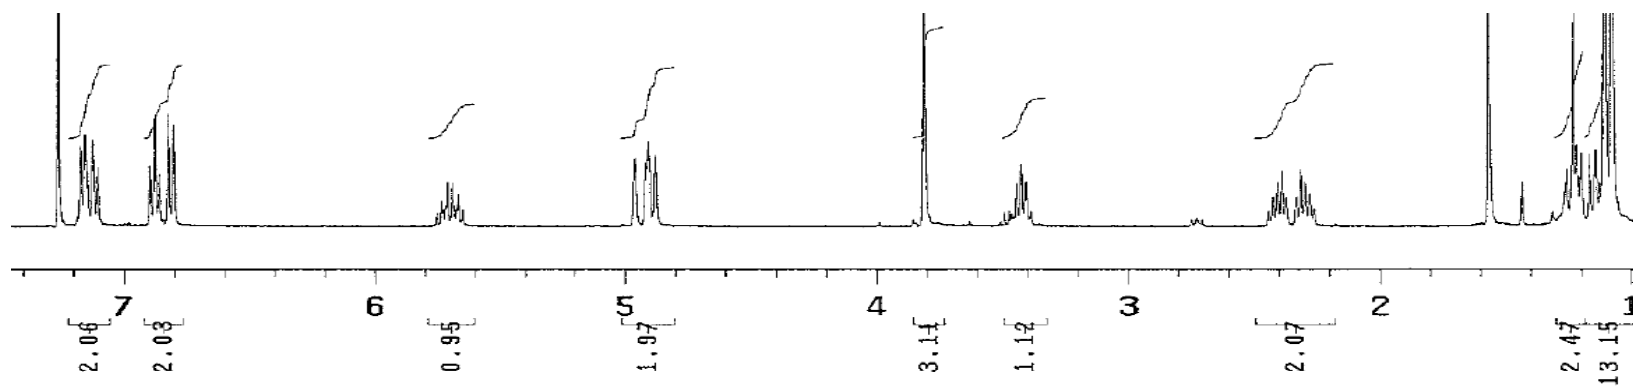



Sample Name: SR-IV-251-B-carbon  
Data Collected on: vnmr13-vnmrs400  
Archive directory:  
Sample directory:  
Fidfile: SR-IV-251-B-carbon  
Pulse Sequence: CARBON (s2pul)  
Solvent: cdcl3  
Data collected on: Aug 26 2014

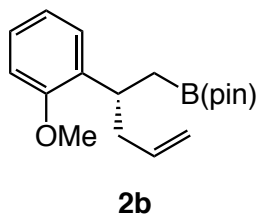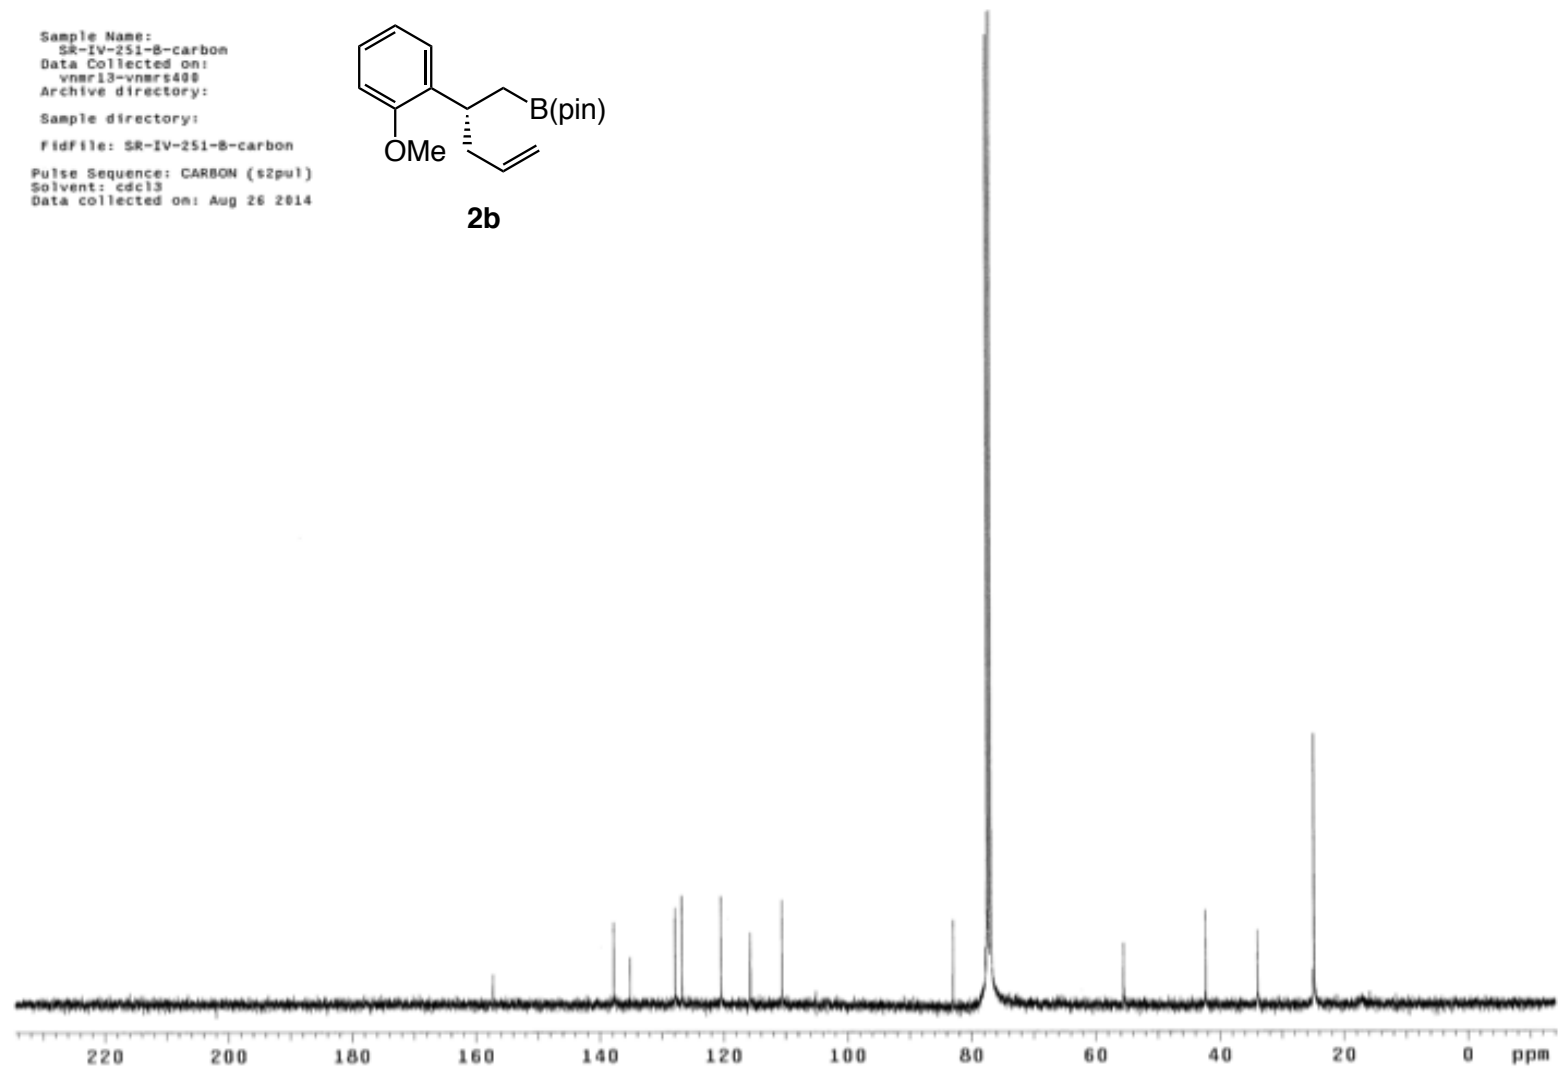

Sample Name:  
SR-V-128  
Data Collected on:  
vmar13-vmars428  
Archive directory:  
Sample directory:  
FidFile: SR-V-128

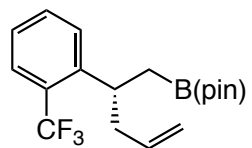

2d

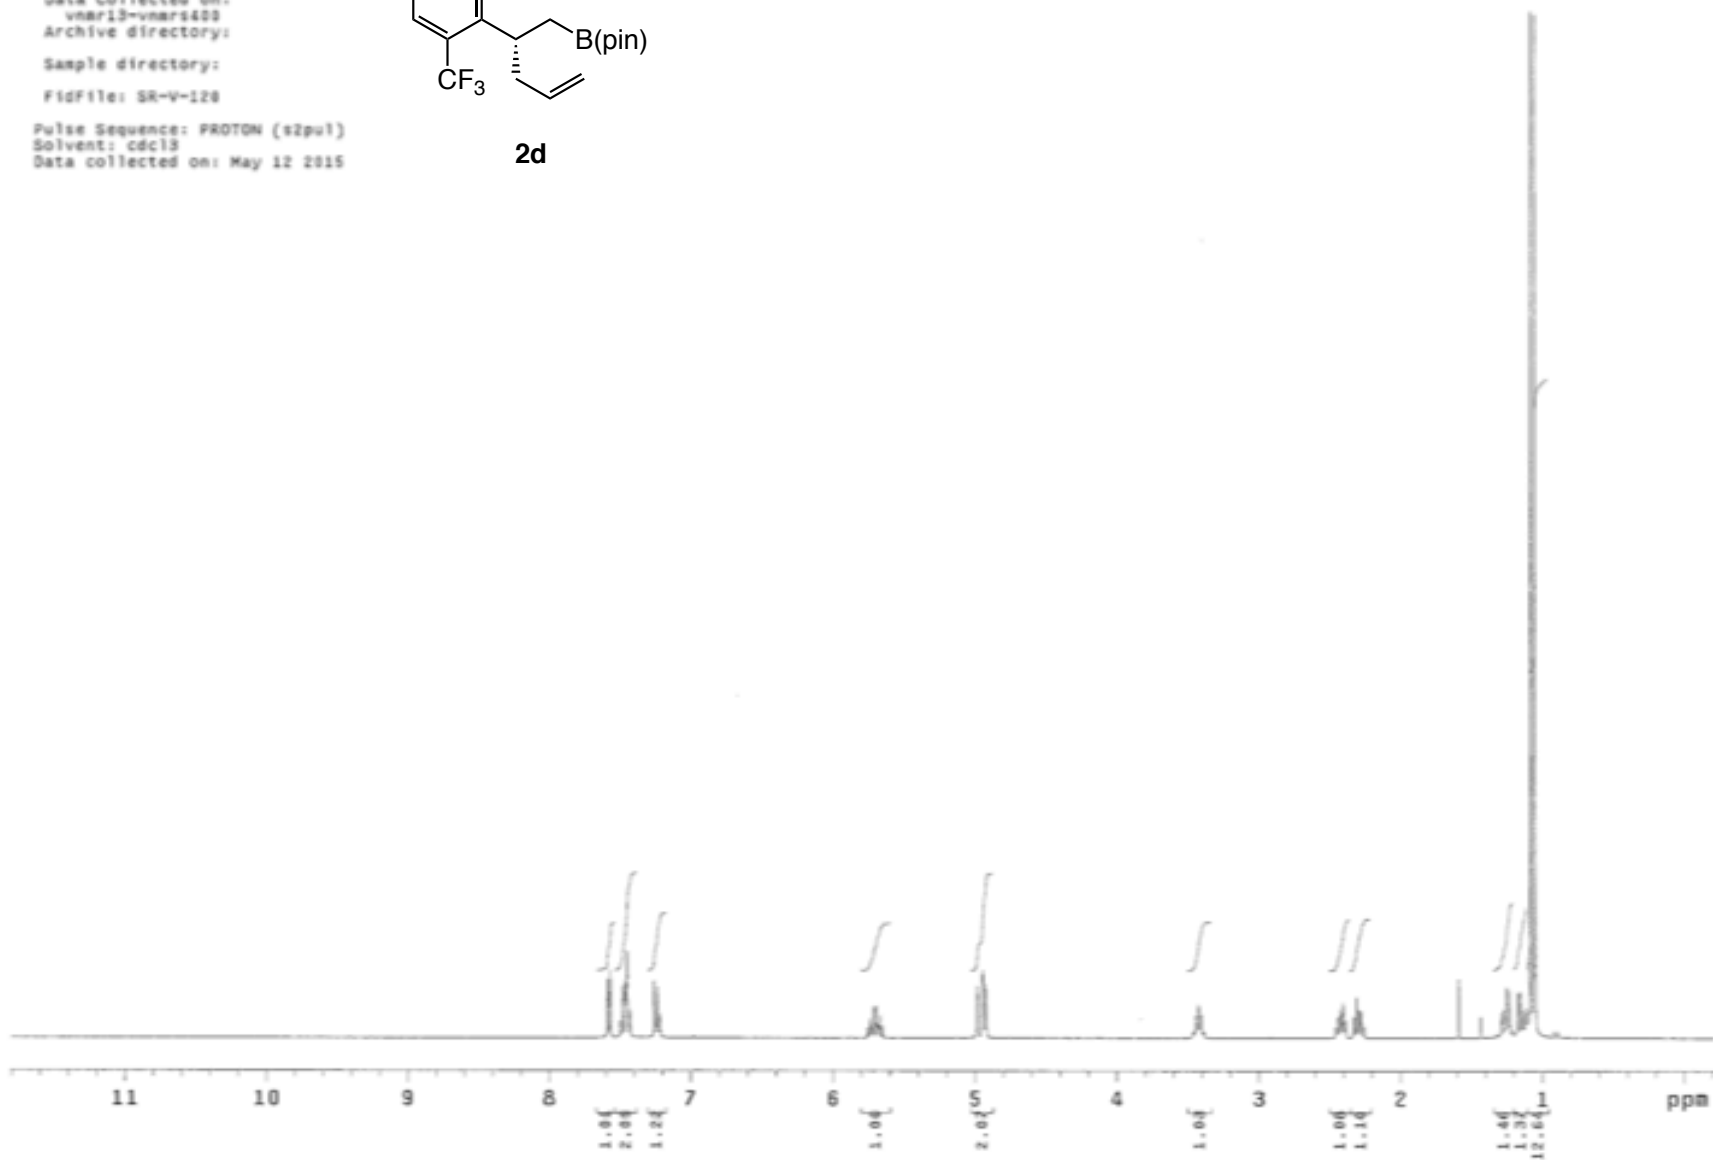

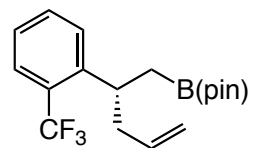

**2d**

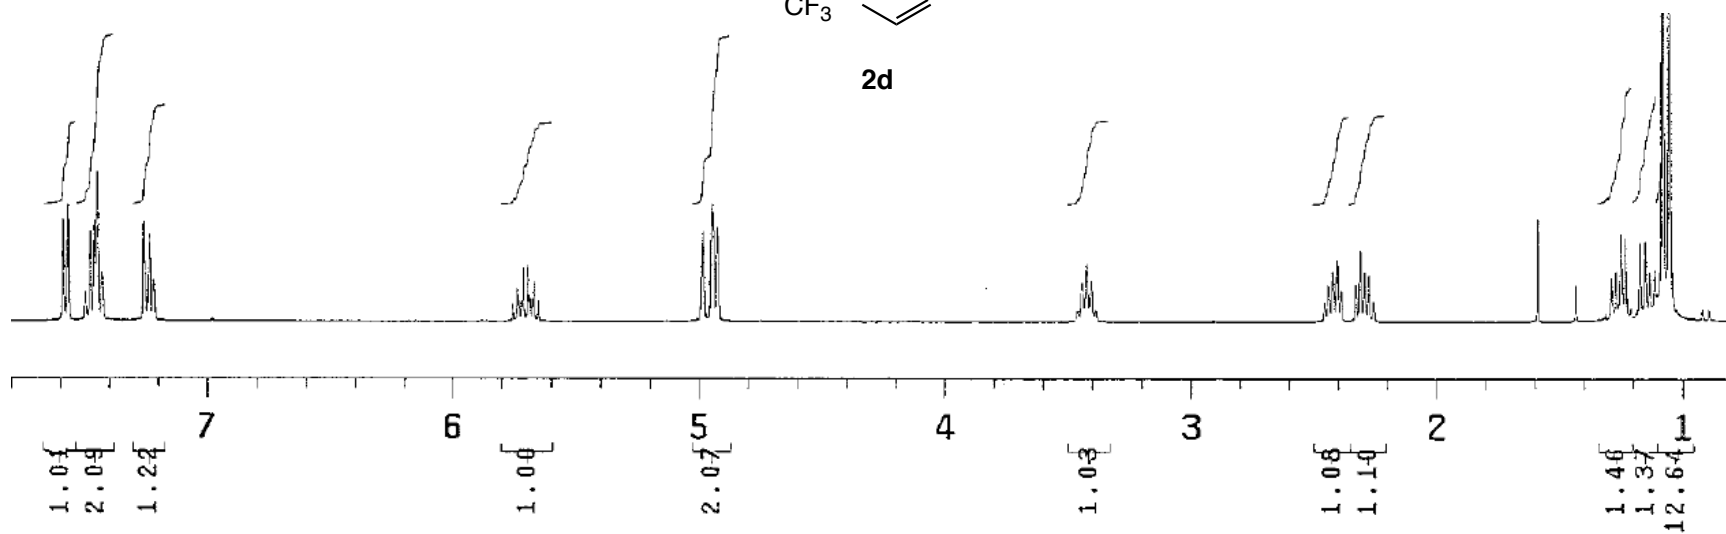

Sample Name:  
Data Collected on:  
vnmr13-vnmrs488  
Archive directory:  
Sample directory:  
FidFile: CARBON  
Pulse Sequence: CARBON (s2pul)  
Solvent: cdcl3  
Data collected on: May 12 2015

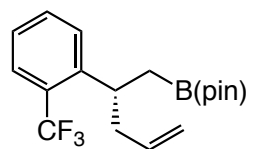

2d

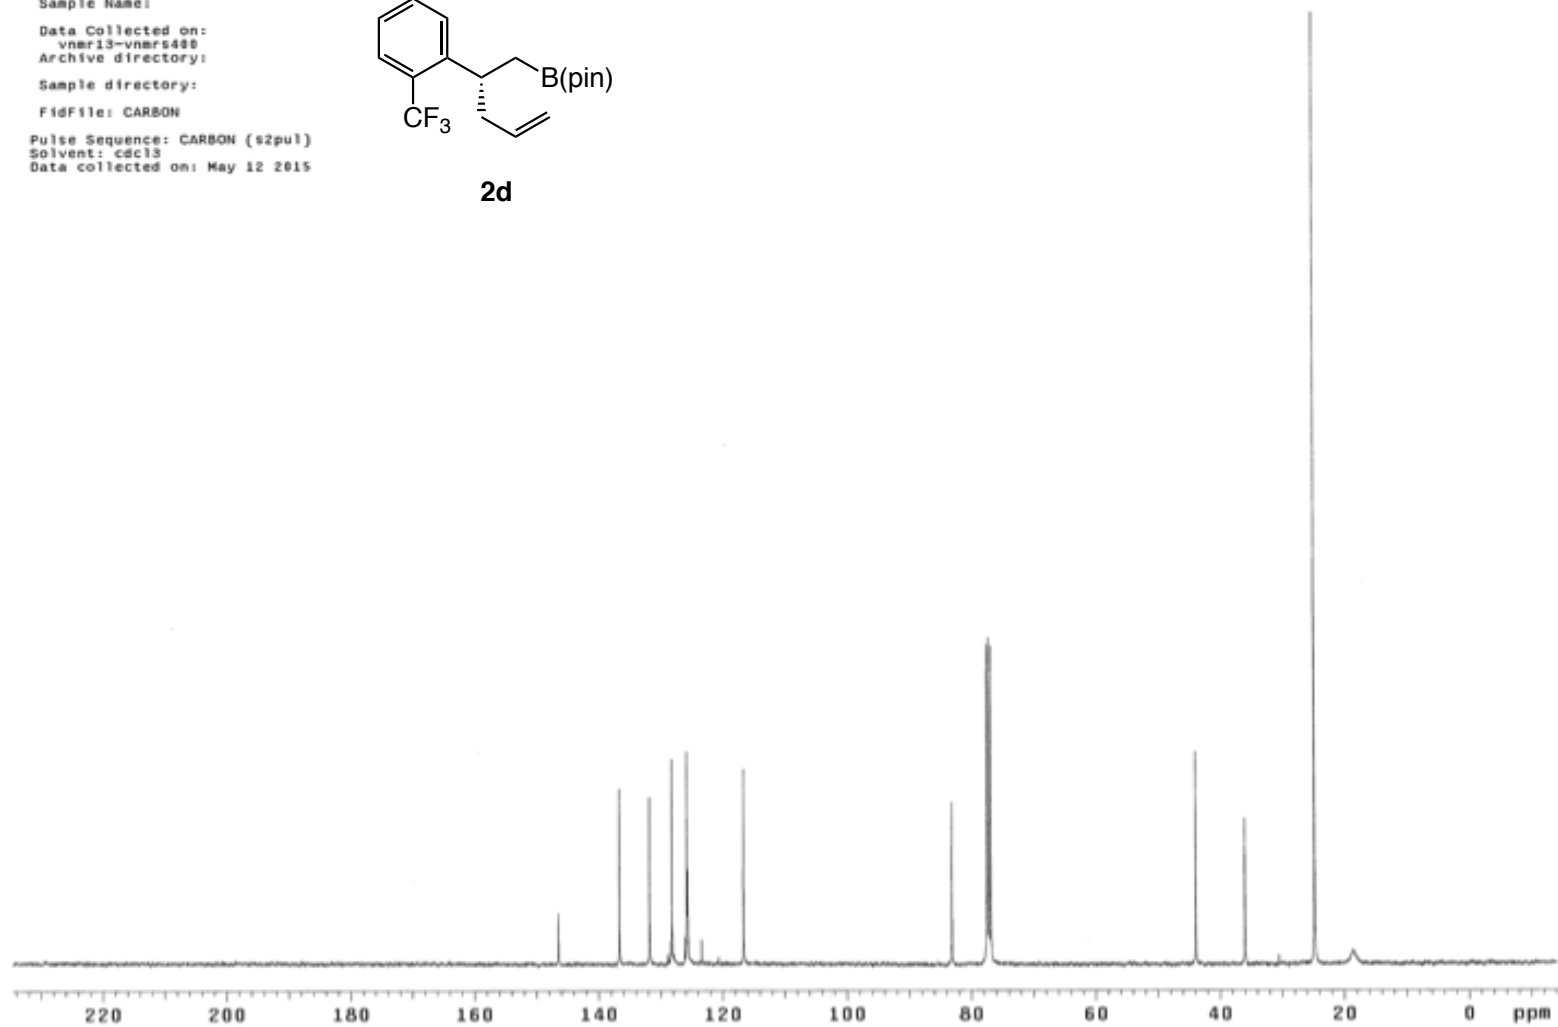

Sample Name:  
SR-V-33  
Data Collected on:  
vnmr13-vnmrs400  
Archive directory:  
Sample directory:  
Fidfile: PROTON  
Pulse Sequence: PROTON (s2pu1)  
Solvent: cdcl3  
Data collected on: Jan 4 2015

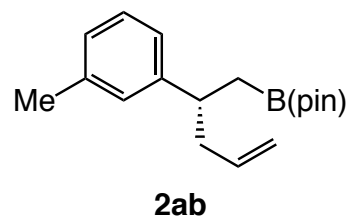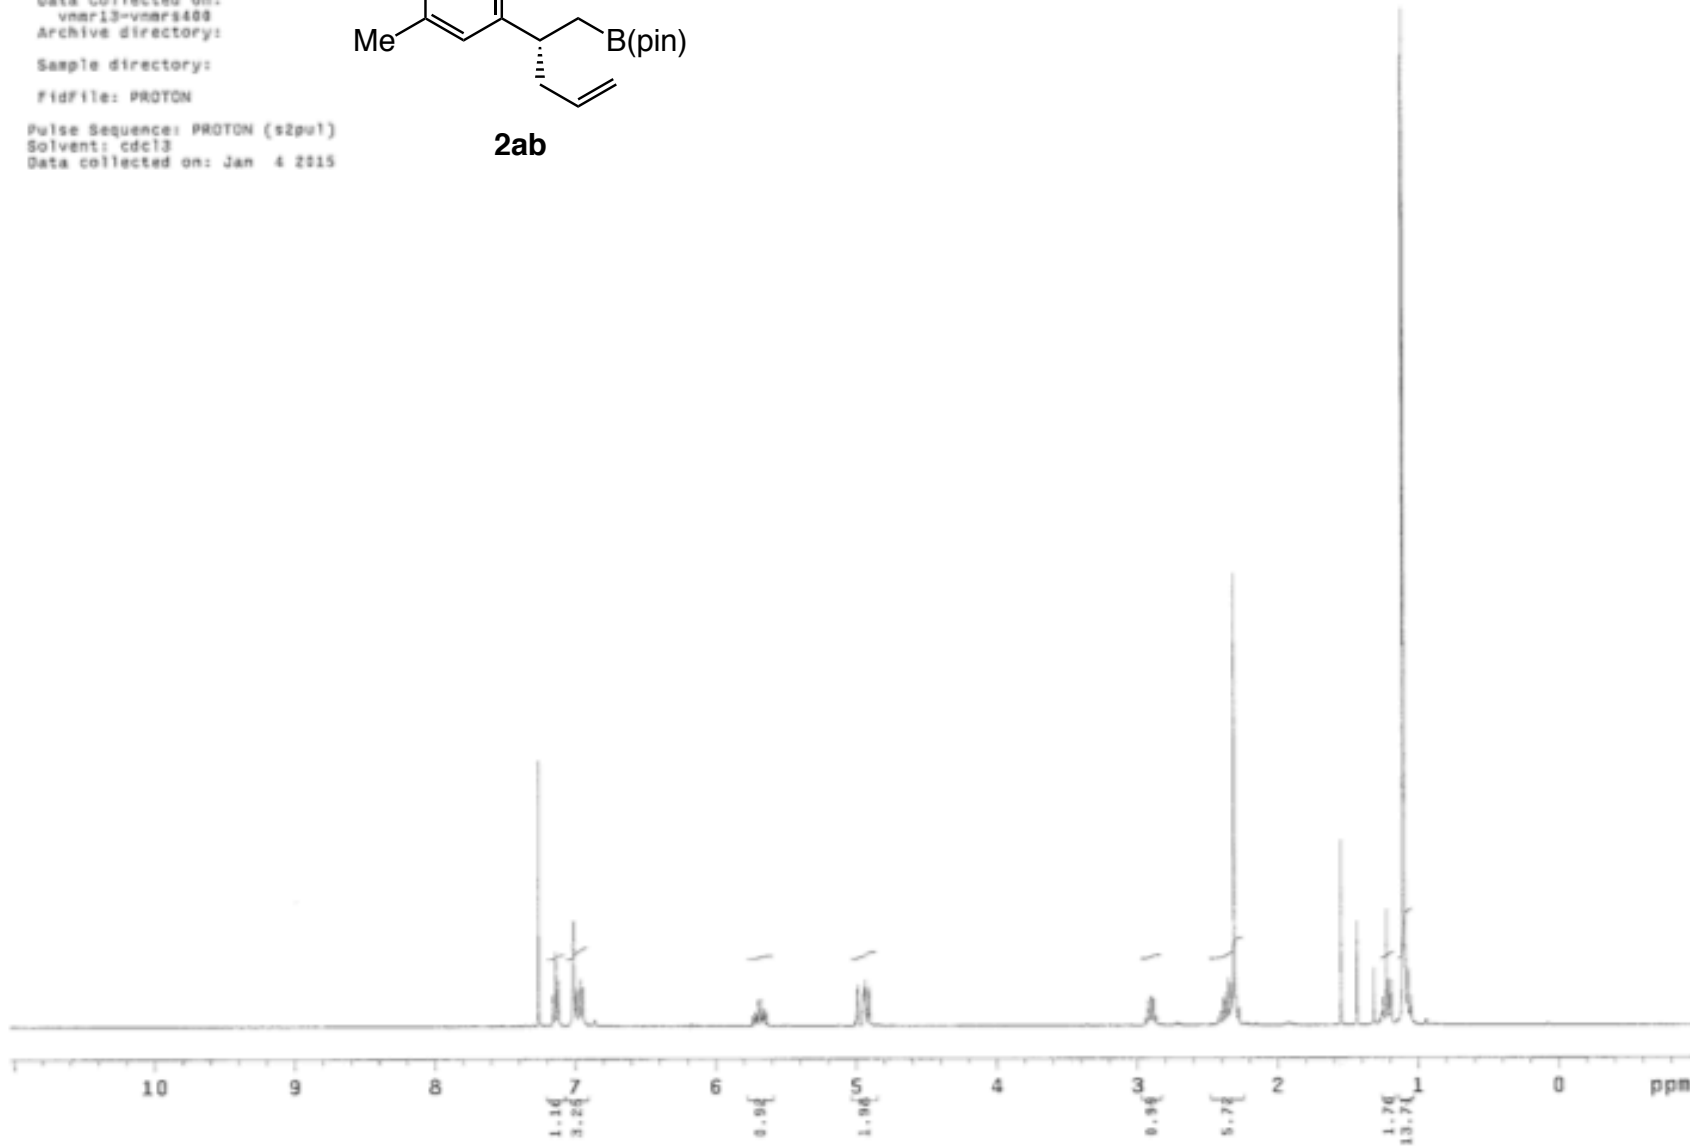

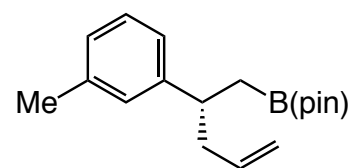

**2ab**

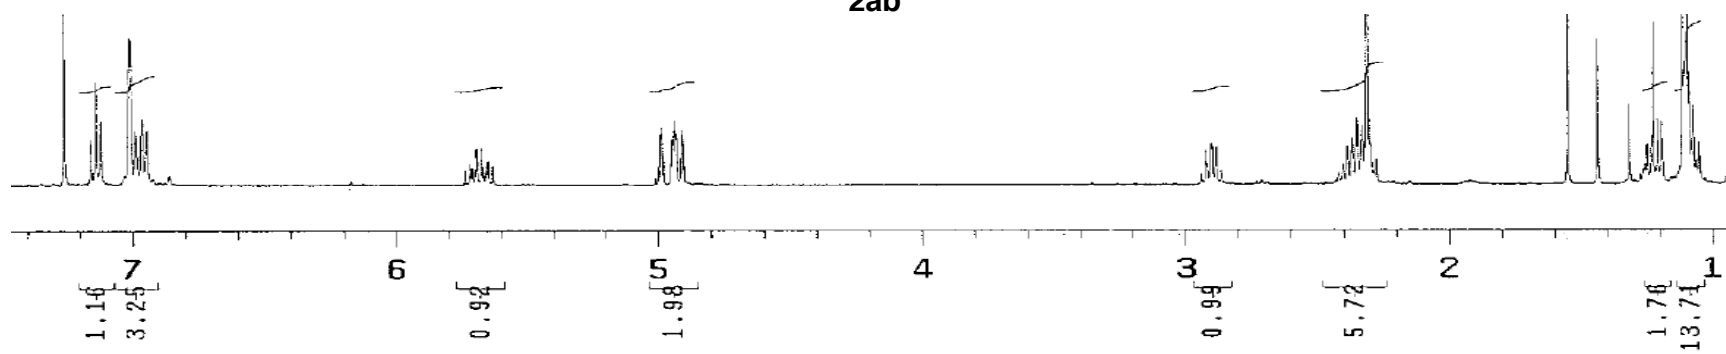

Sample Name: SR-V-33-carbon  
Data Collected on: vnr13-vnr5488  
Archive directory:  
Sample directory:  
FidFile: CARBON  
Pulse Sequence: CARBON (s2pul)  
Solvent: cdcl3  
Data collected on: Dec 23 2014

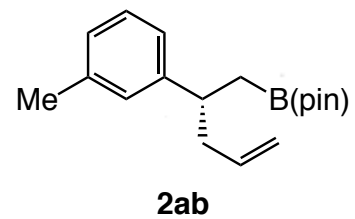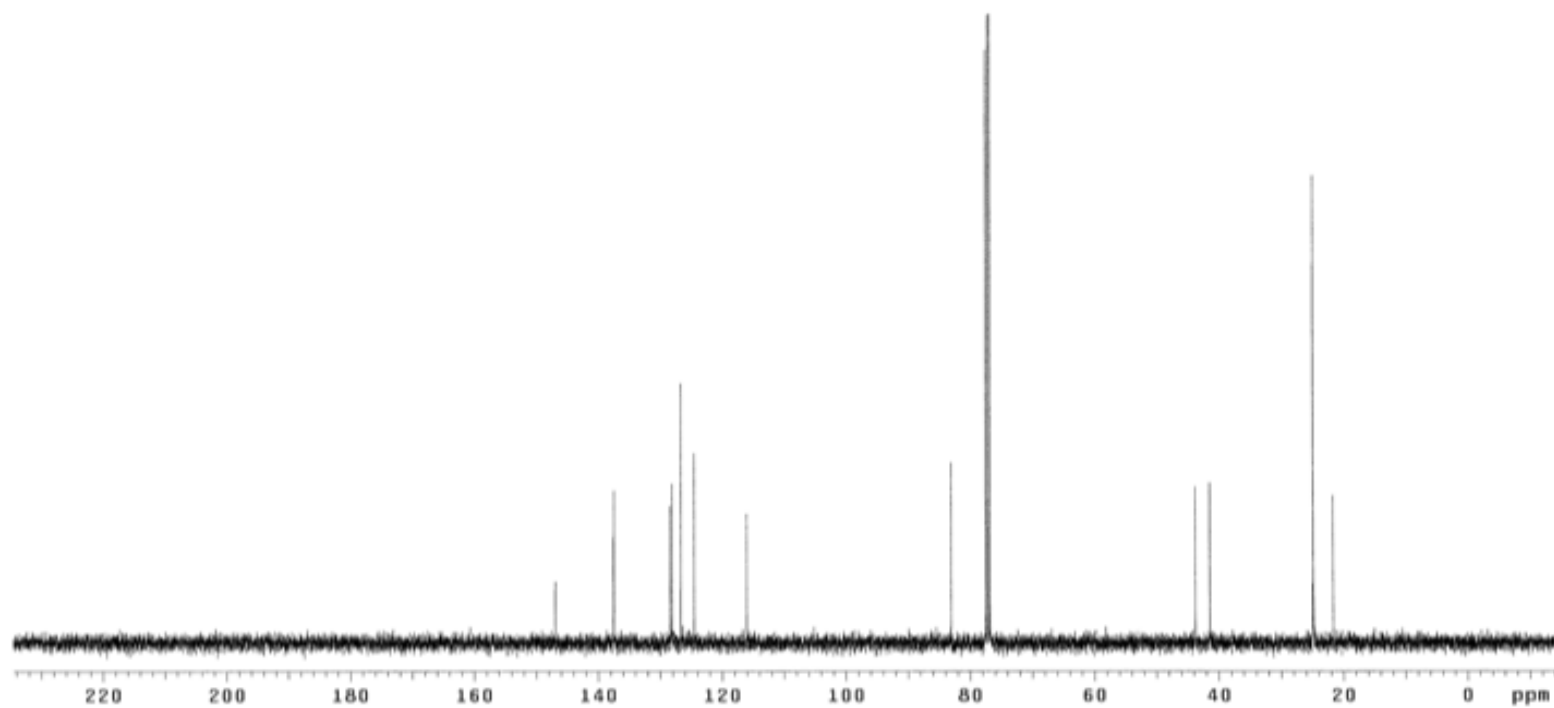

Sample Name:  
 JL-II-299PD  
 Data Collected on:  
 vnr13-vnars400  
 Archive directory:  
 Sample directory:  
 FidFile: PROTON  
 Pulse Sequence: PROTON (s2pu1)  
 Solvent: cdcl3  
 Data collected on: Nov 14 2014

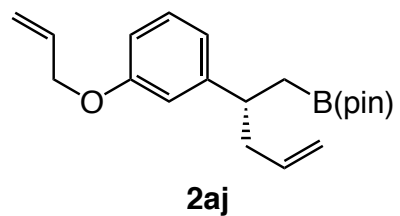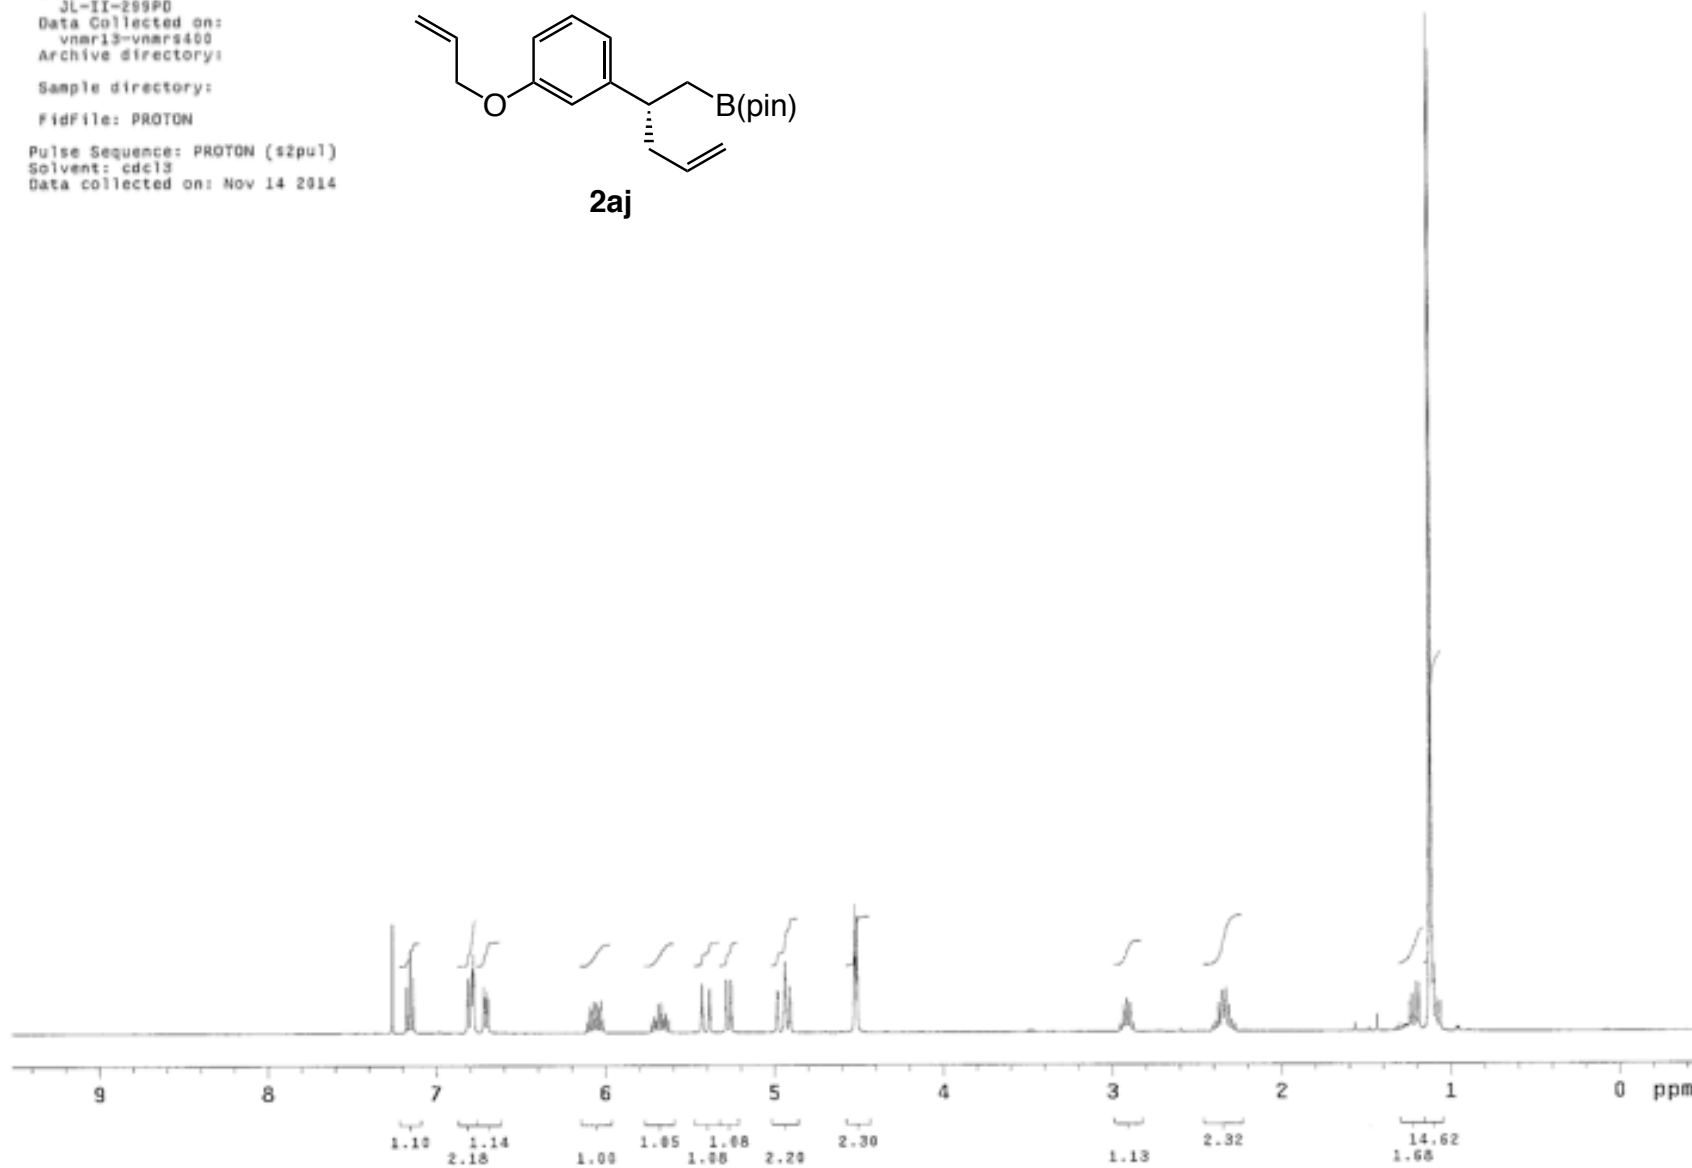



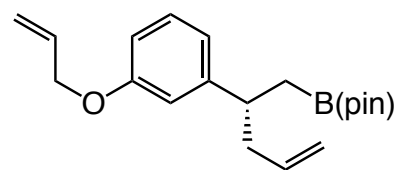

2aj

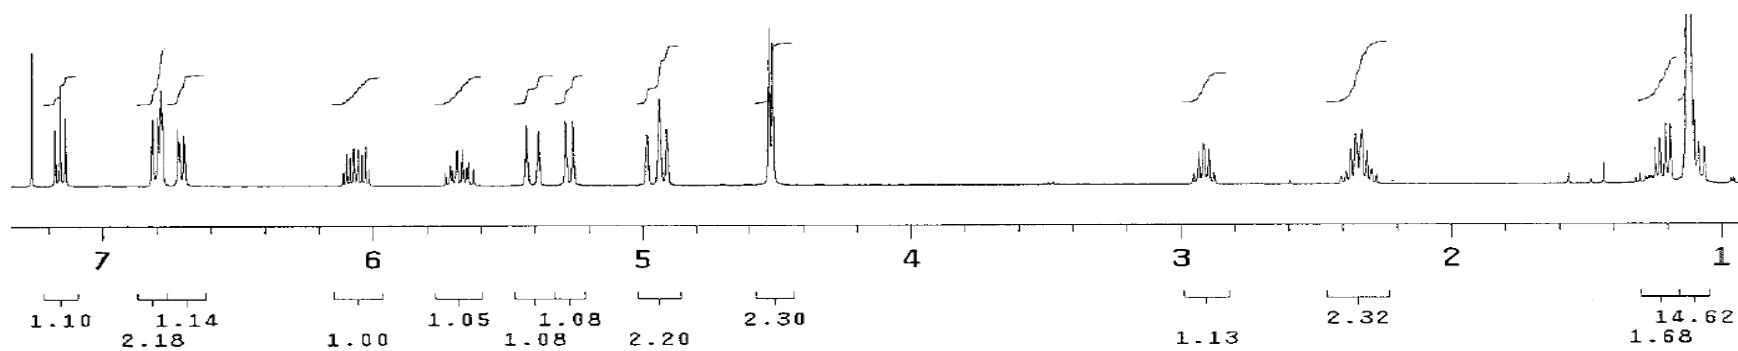

JL-II-298-C-P0

Sample Name:  
JL-II-298-C-P0  
Data Collected on:  
vnr13-vnrs488  
Archive directory:  
Sample directory:  
FidFile: JL-II-298-C-P0  
Pulse Sequence: CARBON (s2pu1)  
Solvent: cdcl3  
Data collected on: Nov 14 2014

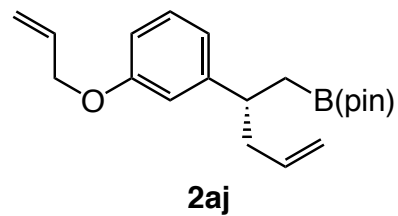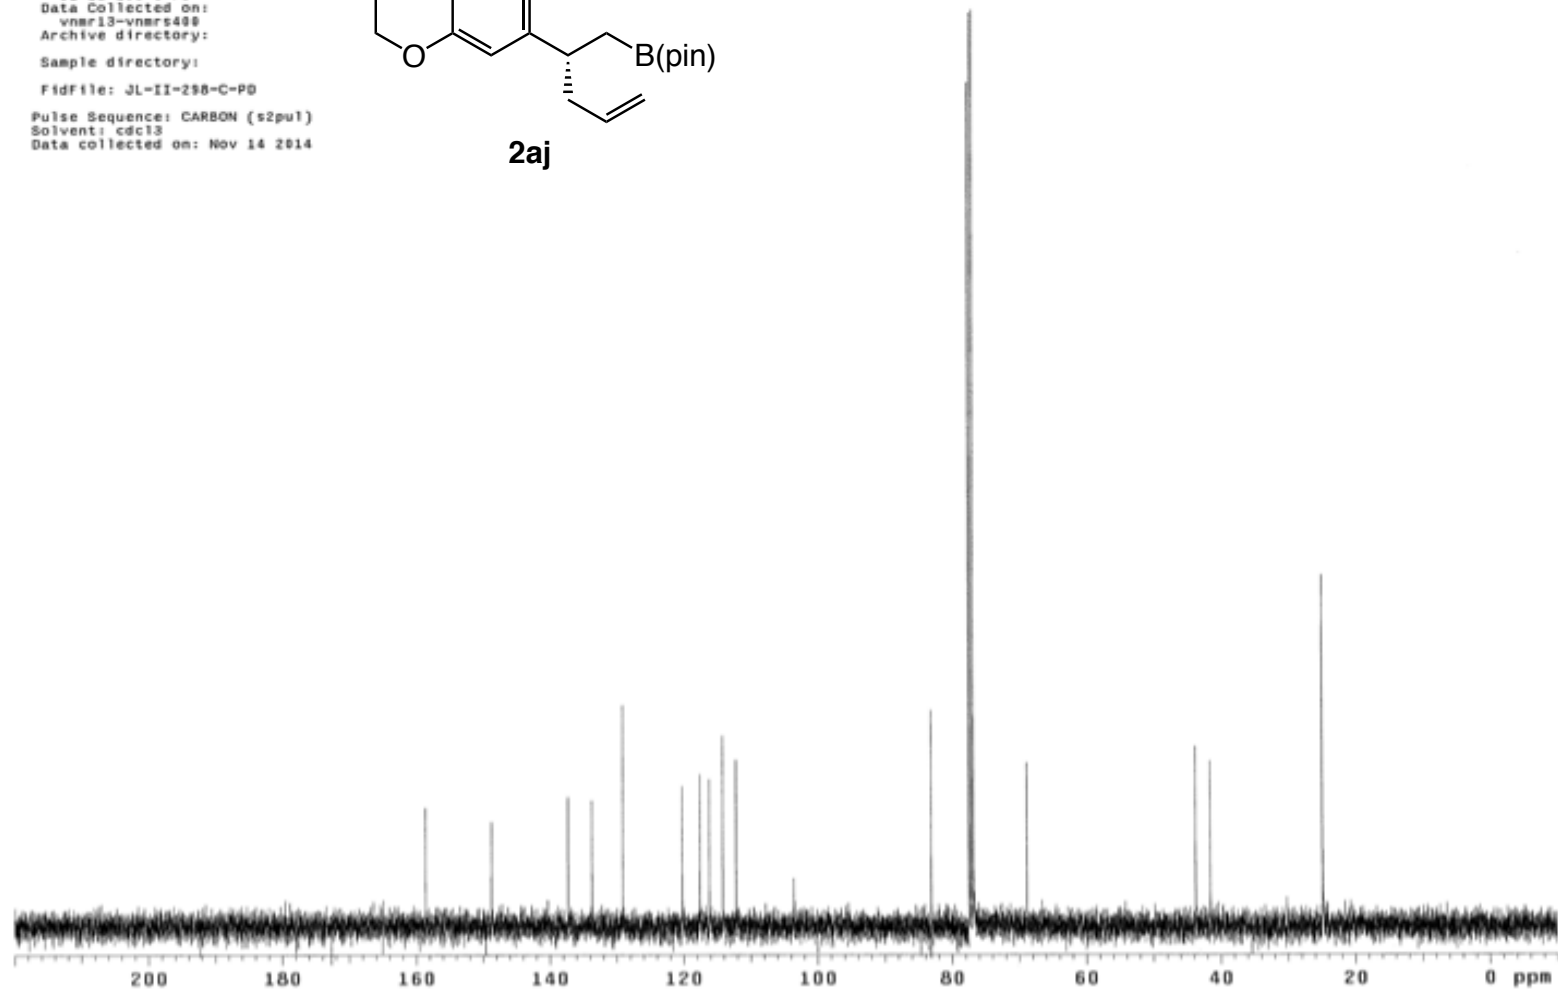

Sample Name:  
 SR-V-161  
 Data Collected on:  
 vnmr13-vnmrs400  
 Archive directory:  
 Sample directory:  
 Fidfile: PROTON  
 Pulse Sequence: PROTON (szpu1)  
 Solvent: cdcl3  
 Data collected on: Aug 11 2015

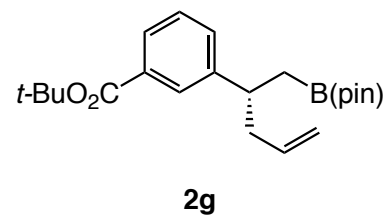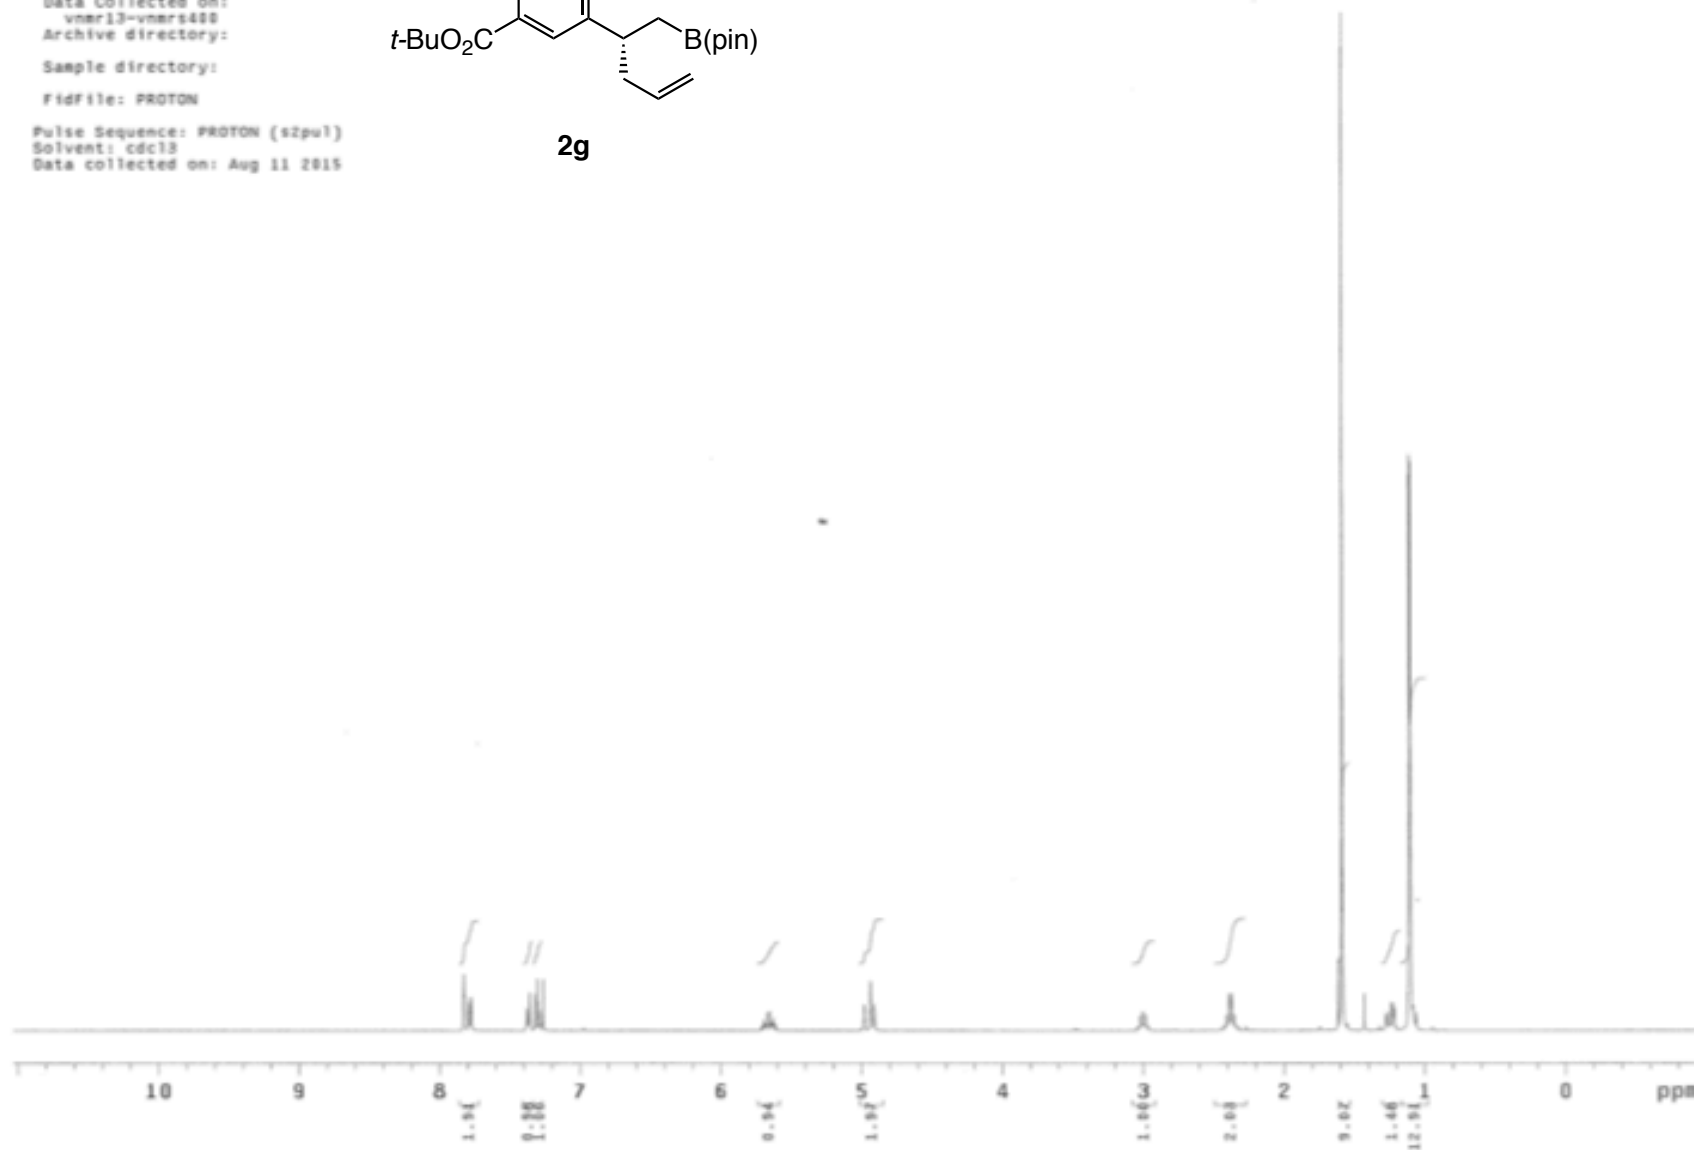

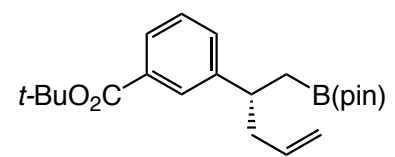

**2g**

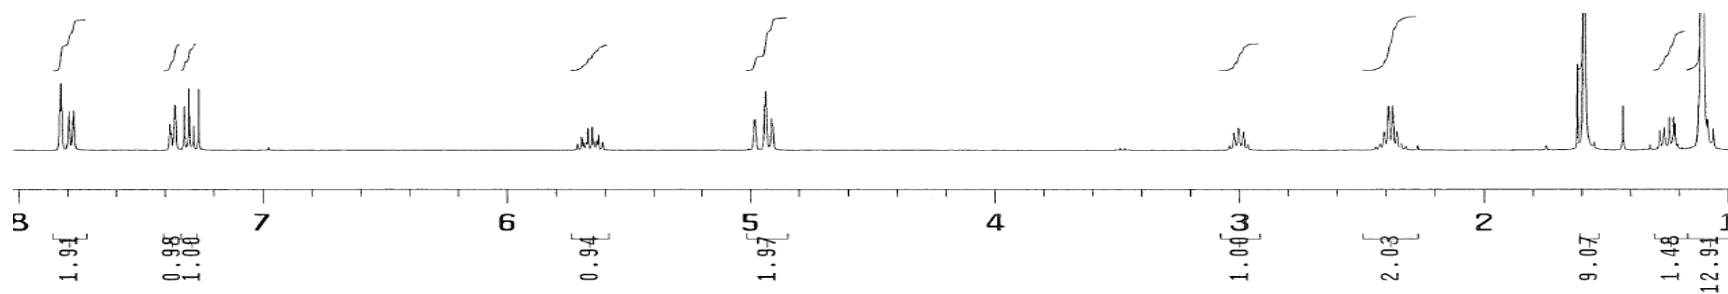

Sample Name:  
SR-V-161-carbon  
Data Collected on:  
vnr13-vnvr5488  
Archive directory:  
Sample directory:  
FidFile: CARBON  
Pulse Sequence: CARBON (s2pu1)  
Solvent: cdcl3  
Data collected on: Aug 11 2015

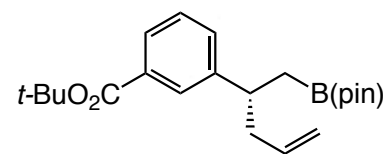

2g

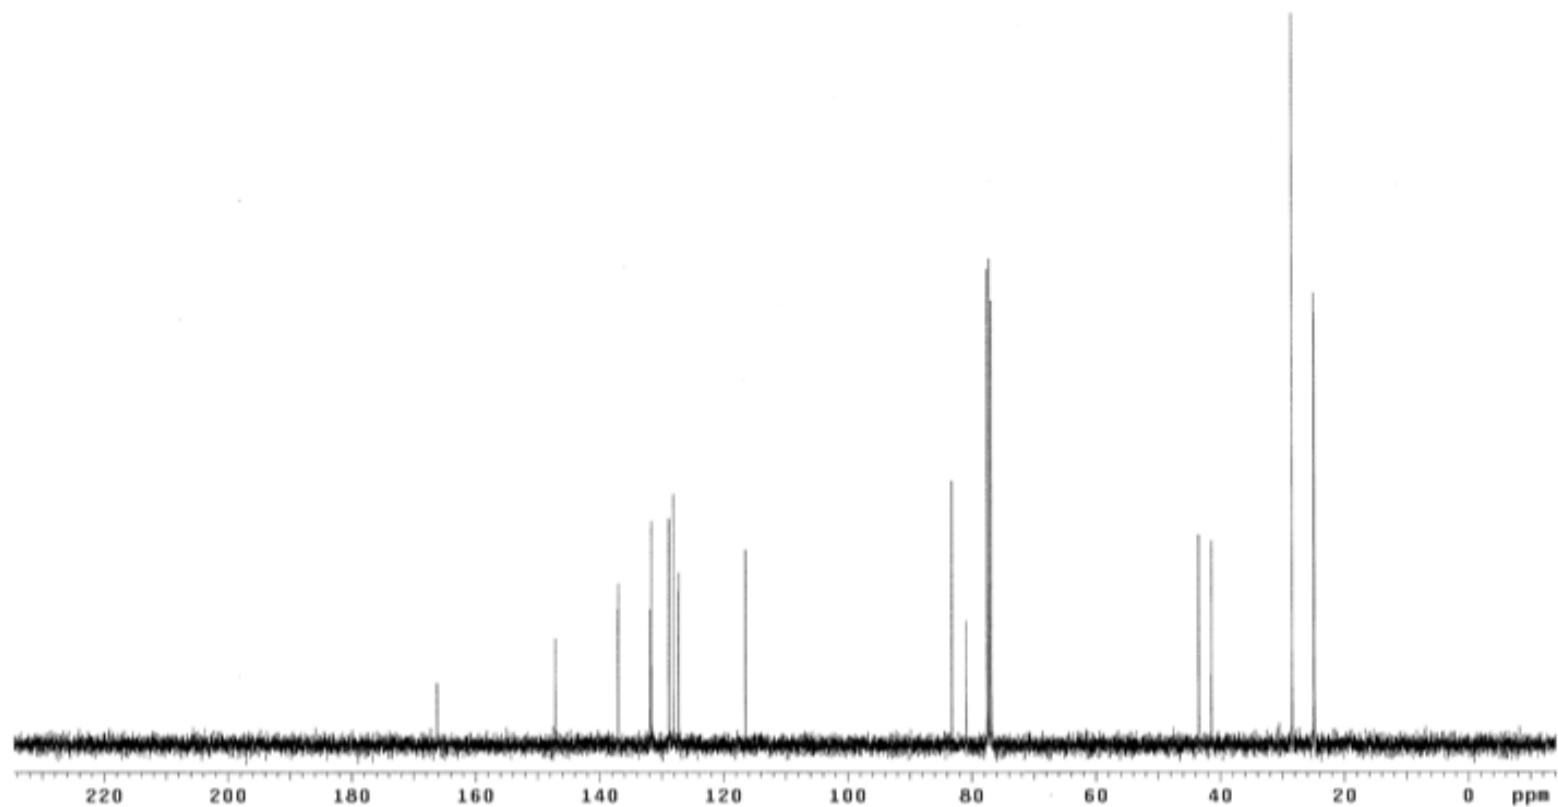

Sample Name:  
SR-V-114  
Data Collected on:  
vmer13-vmars400  
Archive directory:  
Sample directory:  
FidFile: PROTON  
Pulse Sequence: PROTON (szpu1)  
Solvent: cdcl3  
Data collected on: May 4 2015

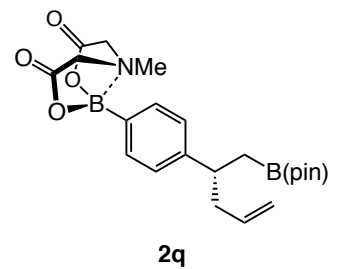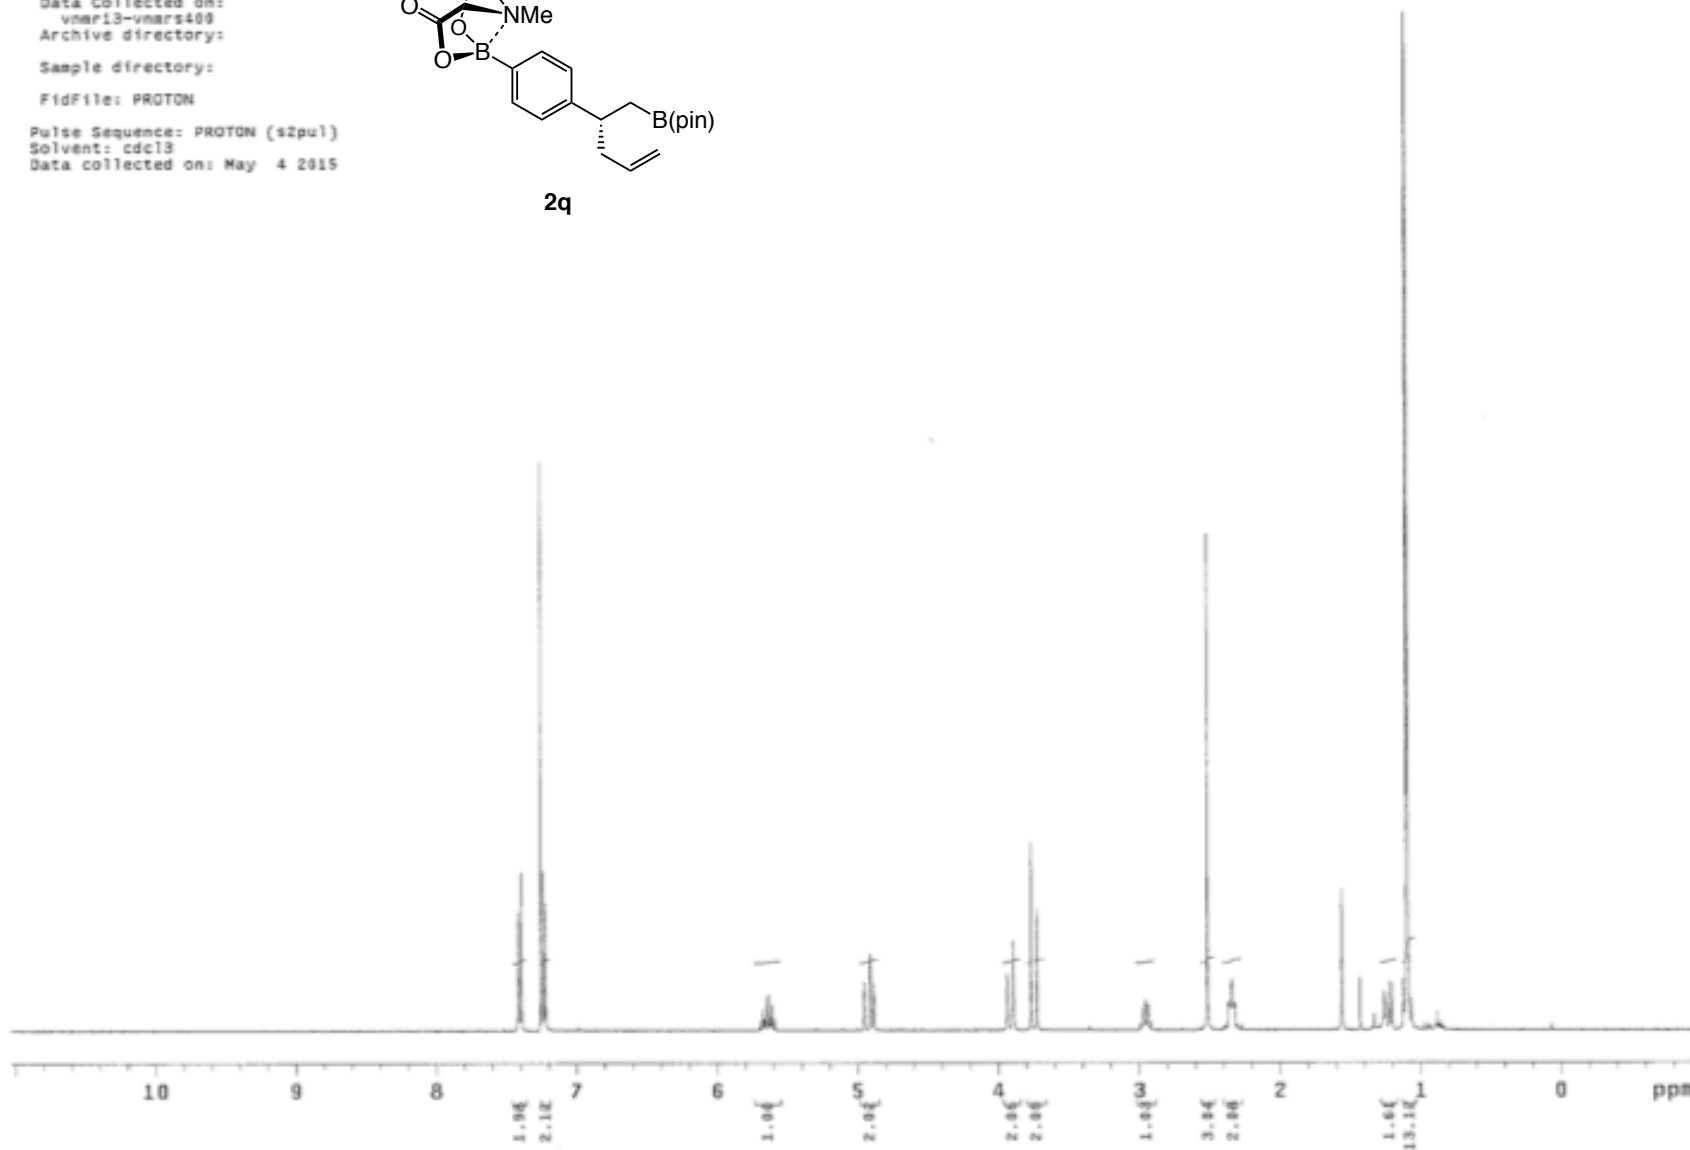

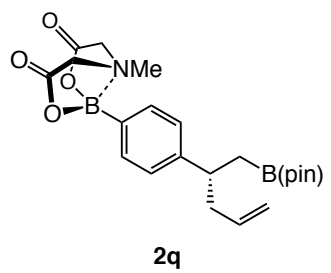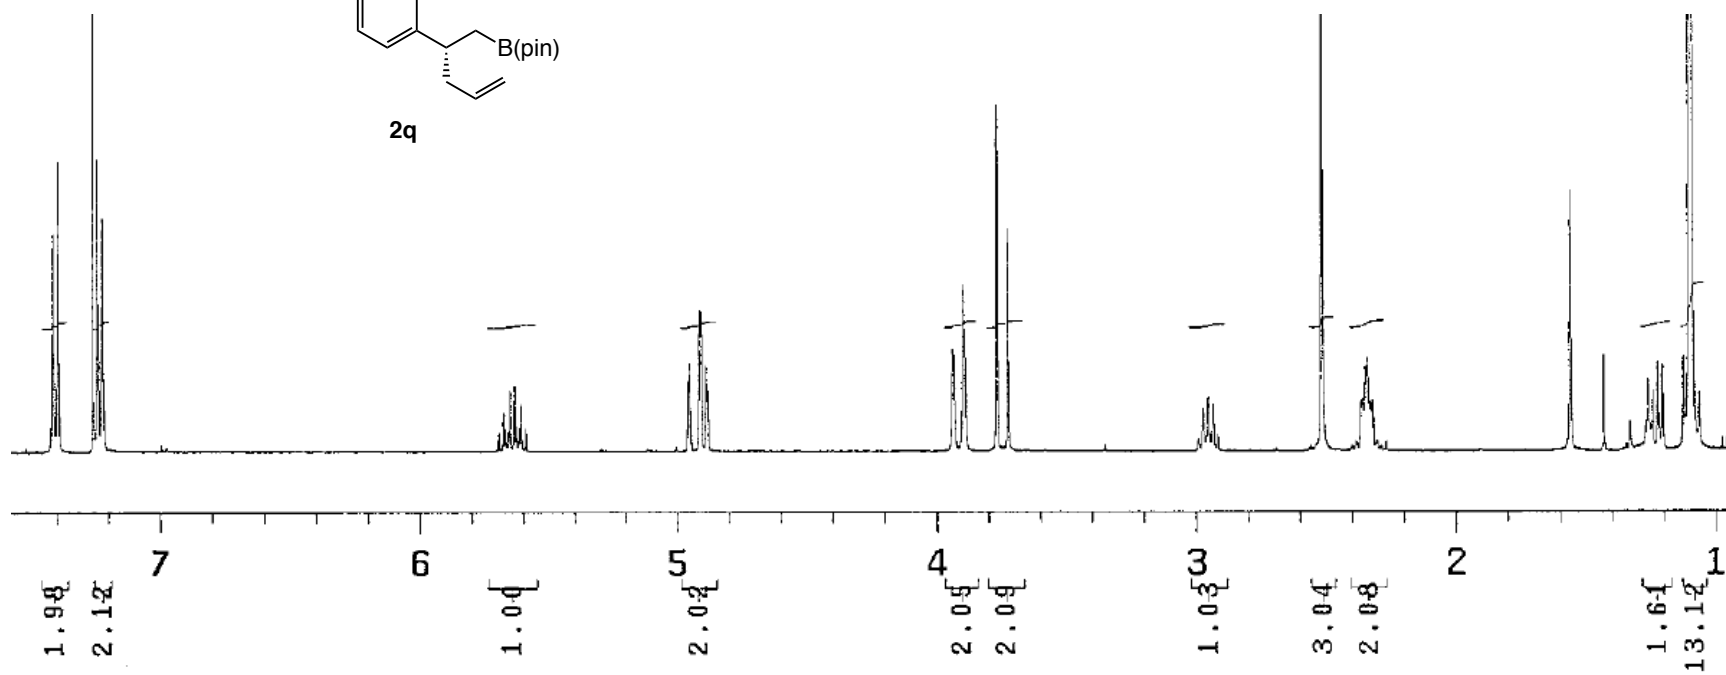

Sample Name:  
SR-V-114-carbon  
Data Collected on:  
vnmr13-vnmrs400  
Archive directory:  
Sample directory:  
FidFile: SR-V-114-carbon  
Pulse Sequence: CARBON (s2pu1)  
Solvent: cdcl3  
Data collected on: Apr 30 2015

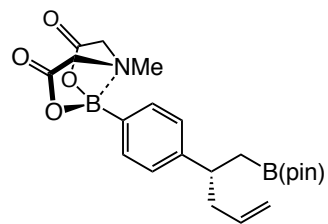

2q

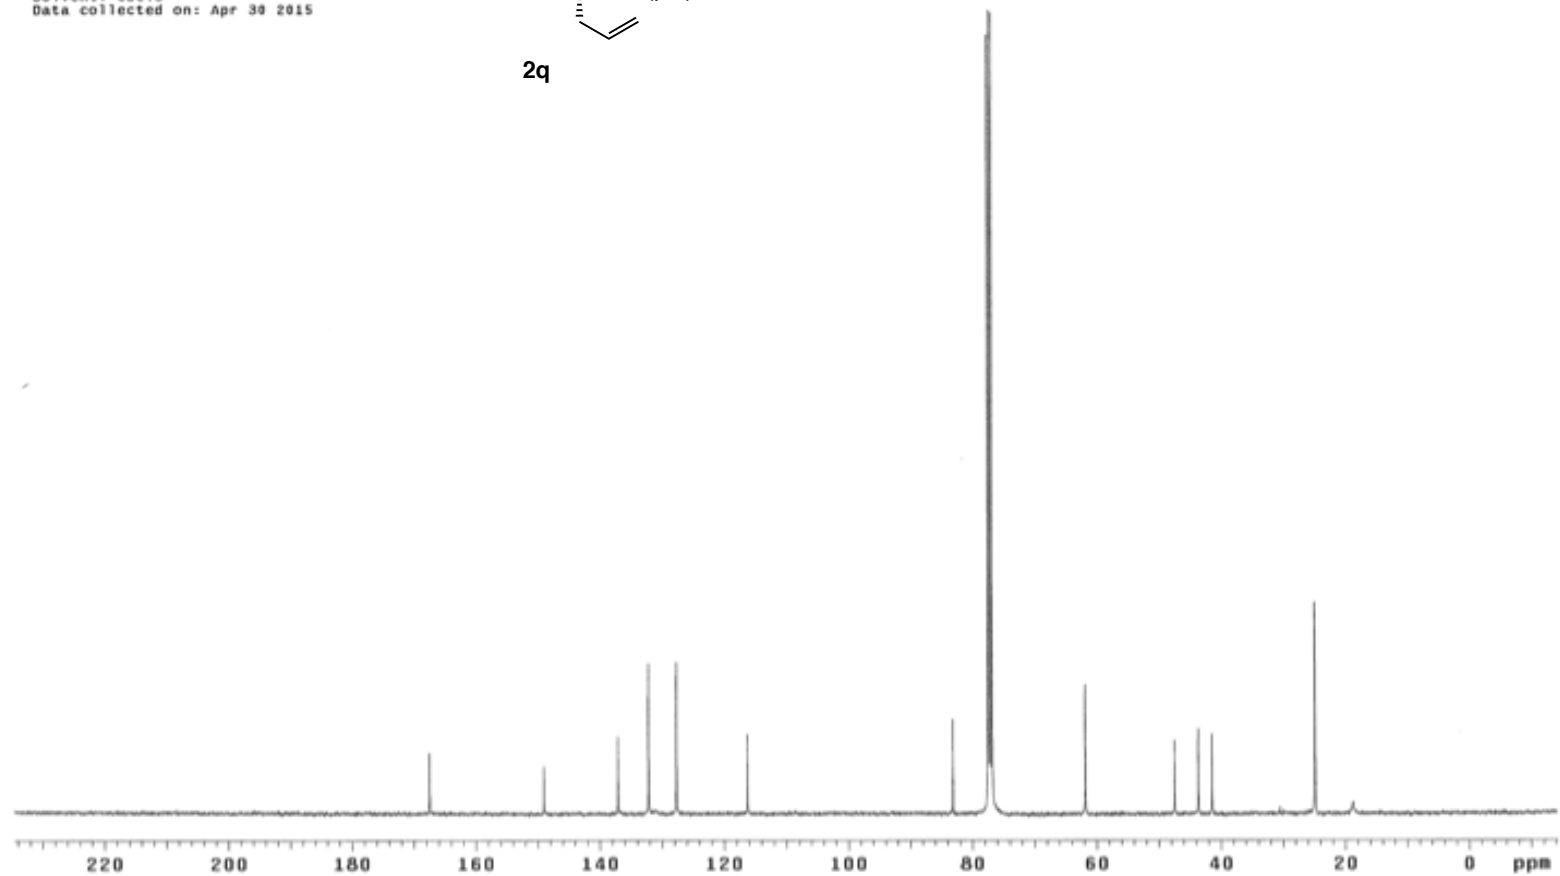



Sample Name:  
SR-V-189  
Data Collected on:  
vnr13-vnrs400  
Archive directory:  
Sample directory:  
FidFile: PROTON  
Pulse Sequence: PROTON (s2pu1)  
Solvent: cdcl3  
Data collected on: Apr 22 2015

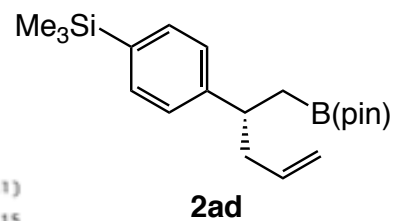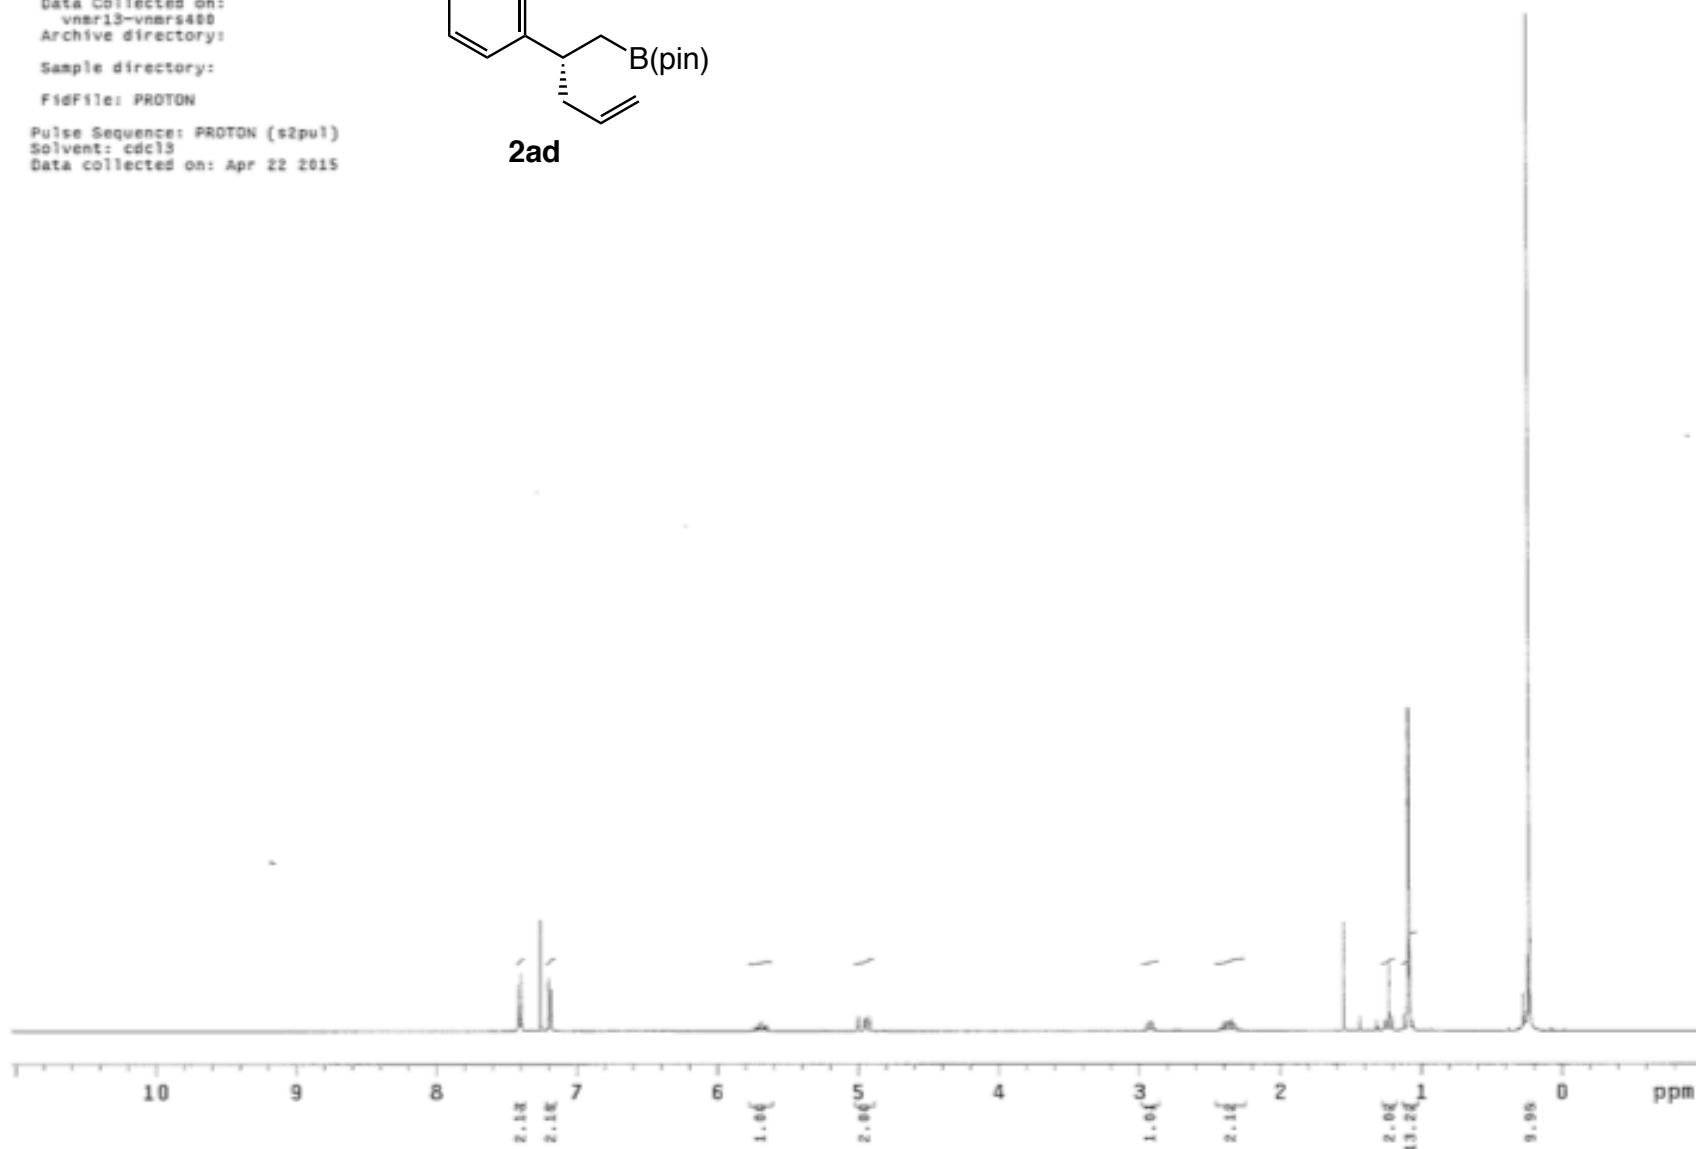

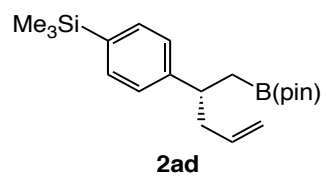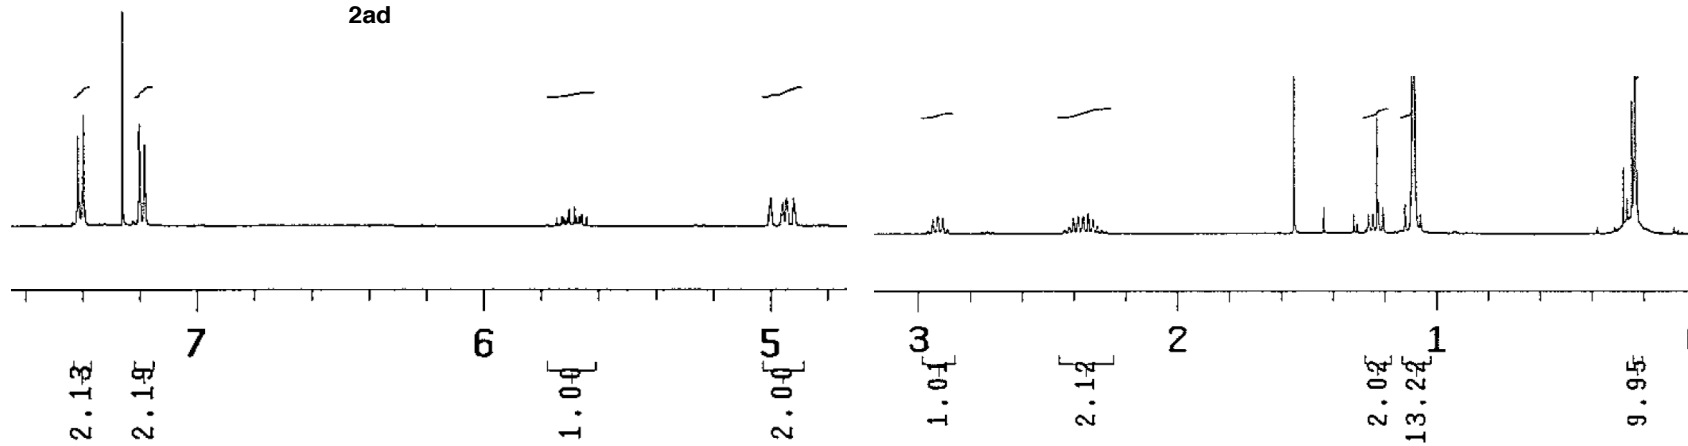

Sample Name:  
SR-V-109-carbon  
Data Collected on:  
vnr13-vnrs438  
Archive directory:  
Sample directory:  
FidFile: CARBON  
Pulse Sequence: CARBON (s2pul)  
Solvent: cdcl3  
Data collected on: Apr 21 2015

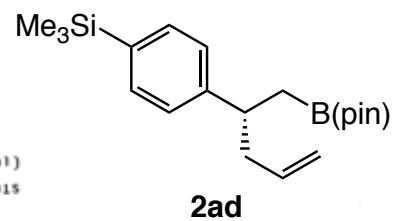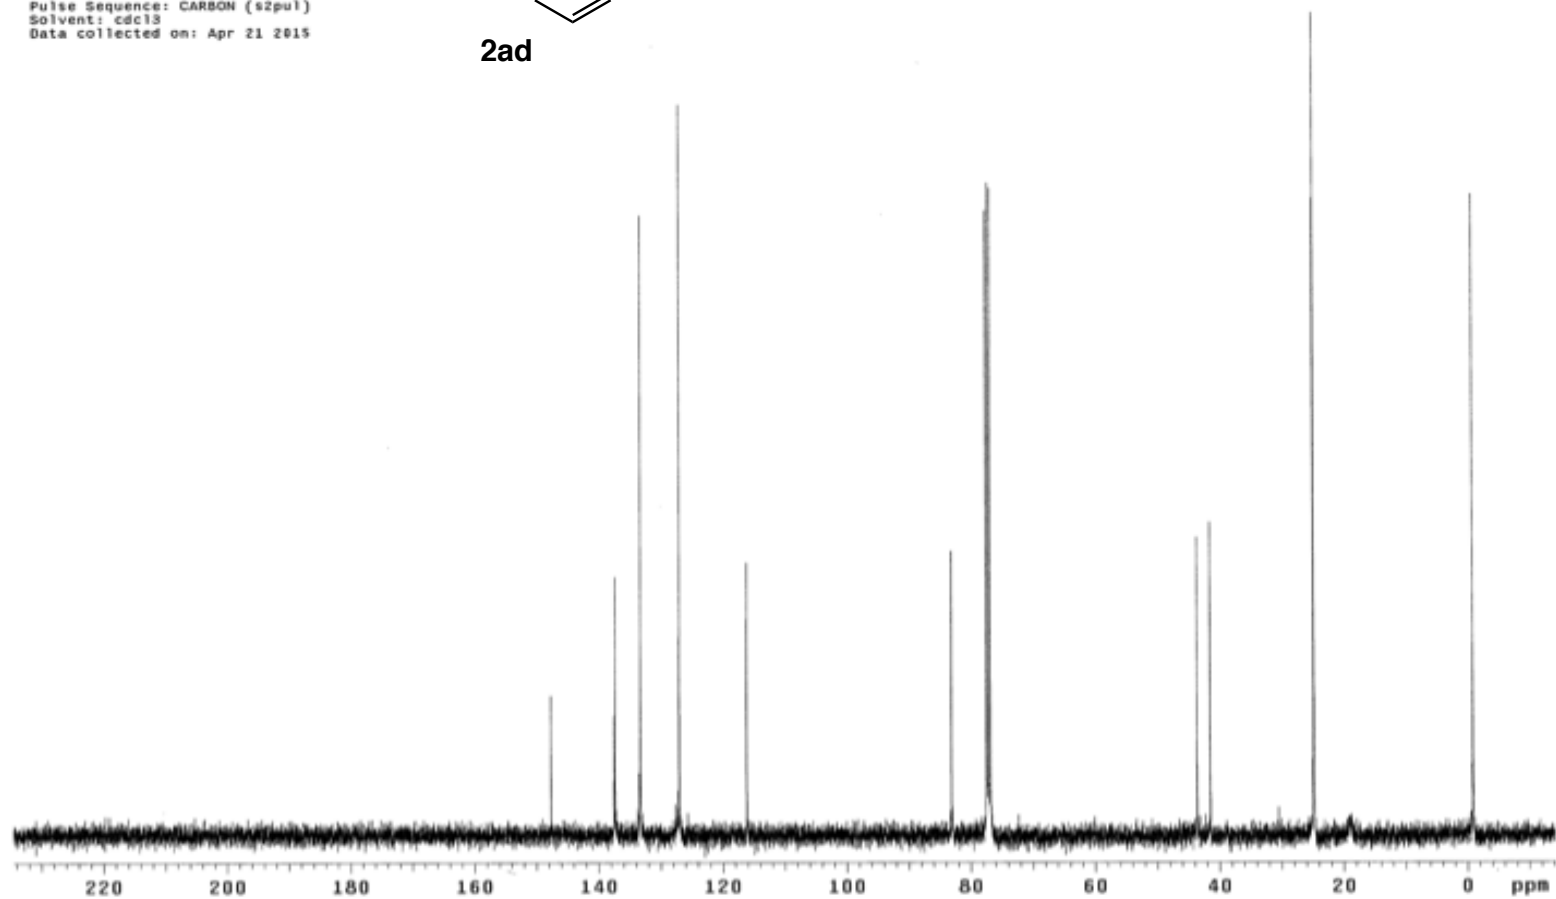

Sample Name:

Data Collected on:

vnmr13-vnmrs600

Archive directory:

Sample directory:

FidFile: PROTON

Pulse Sequence: PROTON (s2pu1)

Solvent: cdcl3

Data collected on: Jan 14 2015

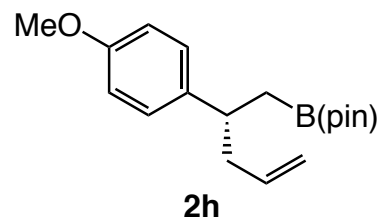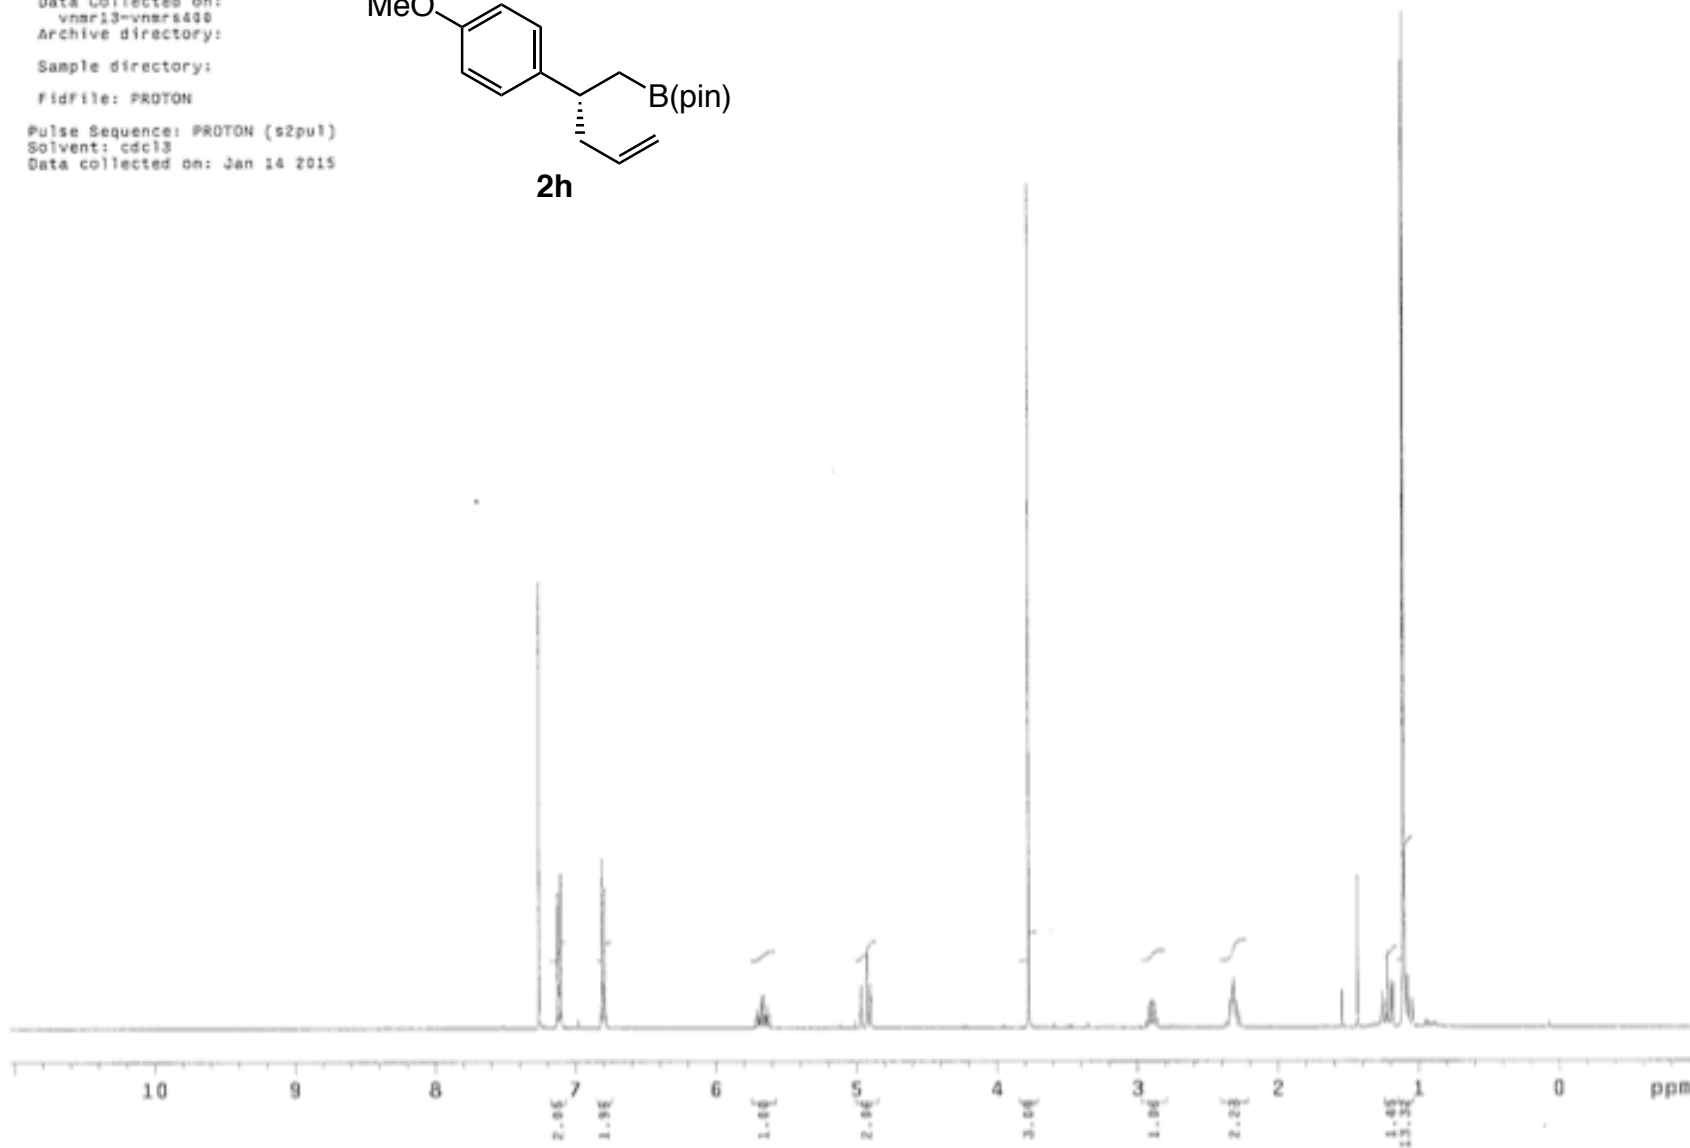

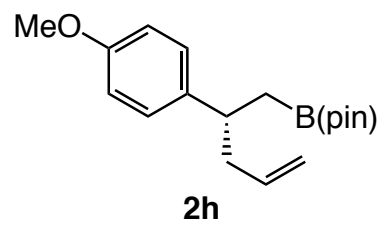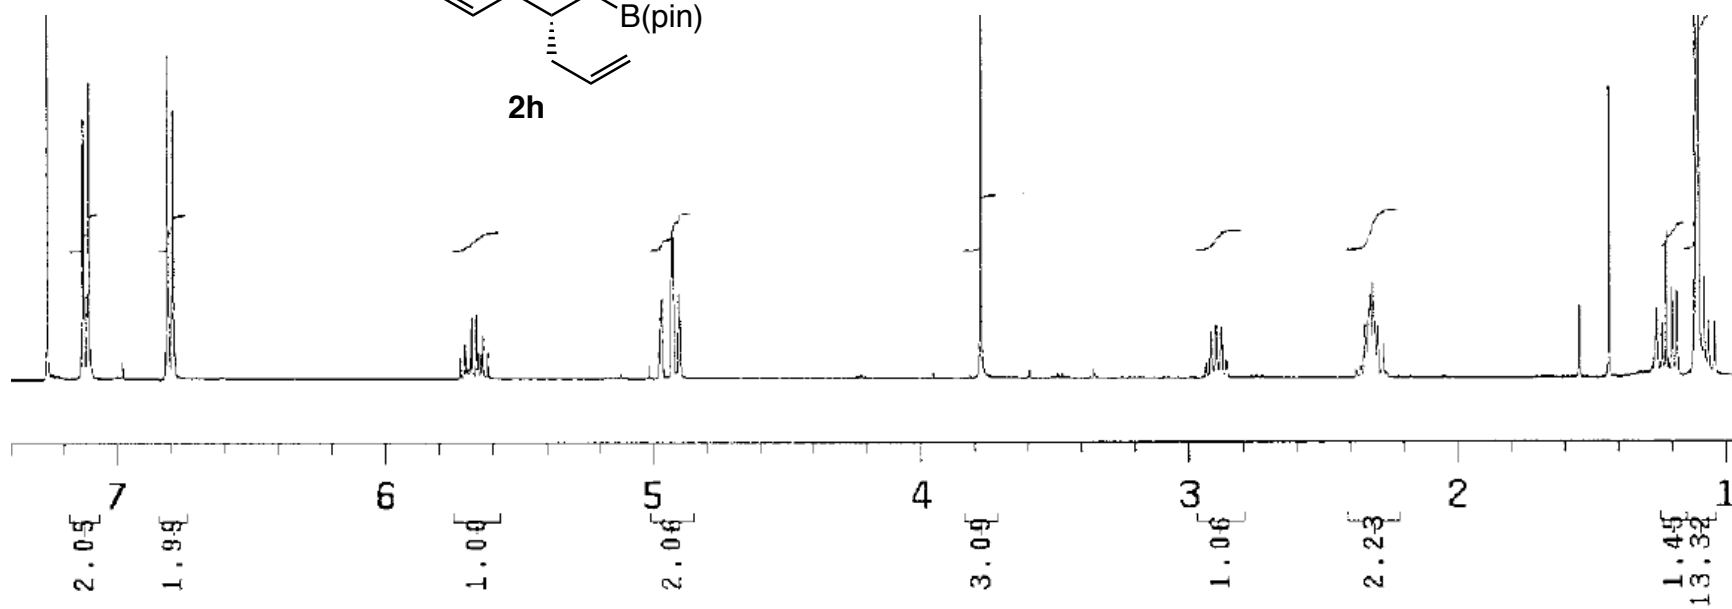

Sample Name:  
Data Collected on:  
vnmr13-vnmrs400  
Archive directory:  
Sample directory:  
FidFile: SR-IV-232-A-carbon  
Pulse Sequence: CARBON [s2pu1]  
Solvent: cdcl3  
Data collected on: Oct 31 2015

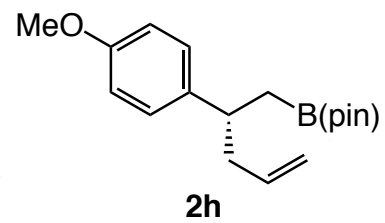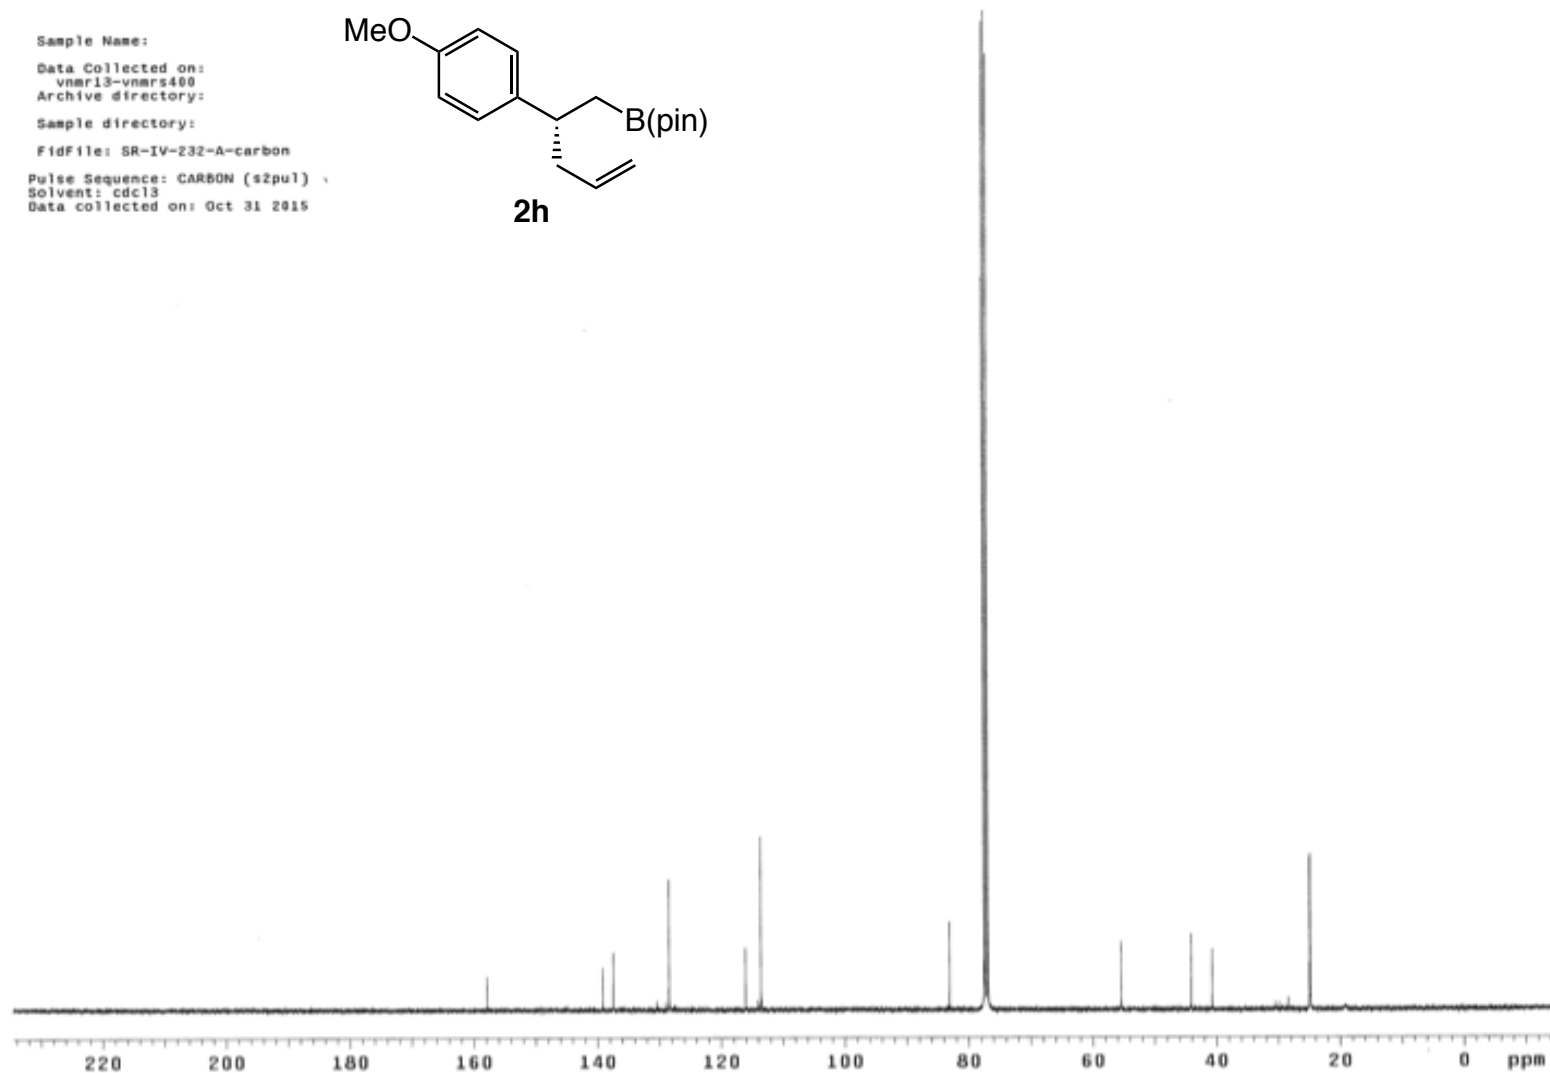

Sample Name:  
 SR-V-153-6-pTLC  
 Data Collected on:  
 vnmr13-vnmrs400  
 Archive directory:  
 Sample directory:  
 FidFile: PROTON  
 Pulse Sequence: PROTON (s2pu1)  
 Solvent: cdCl3  
 Data collected on: Jul 27 2015

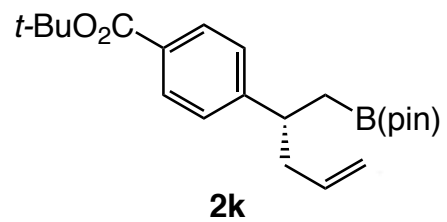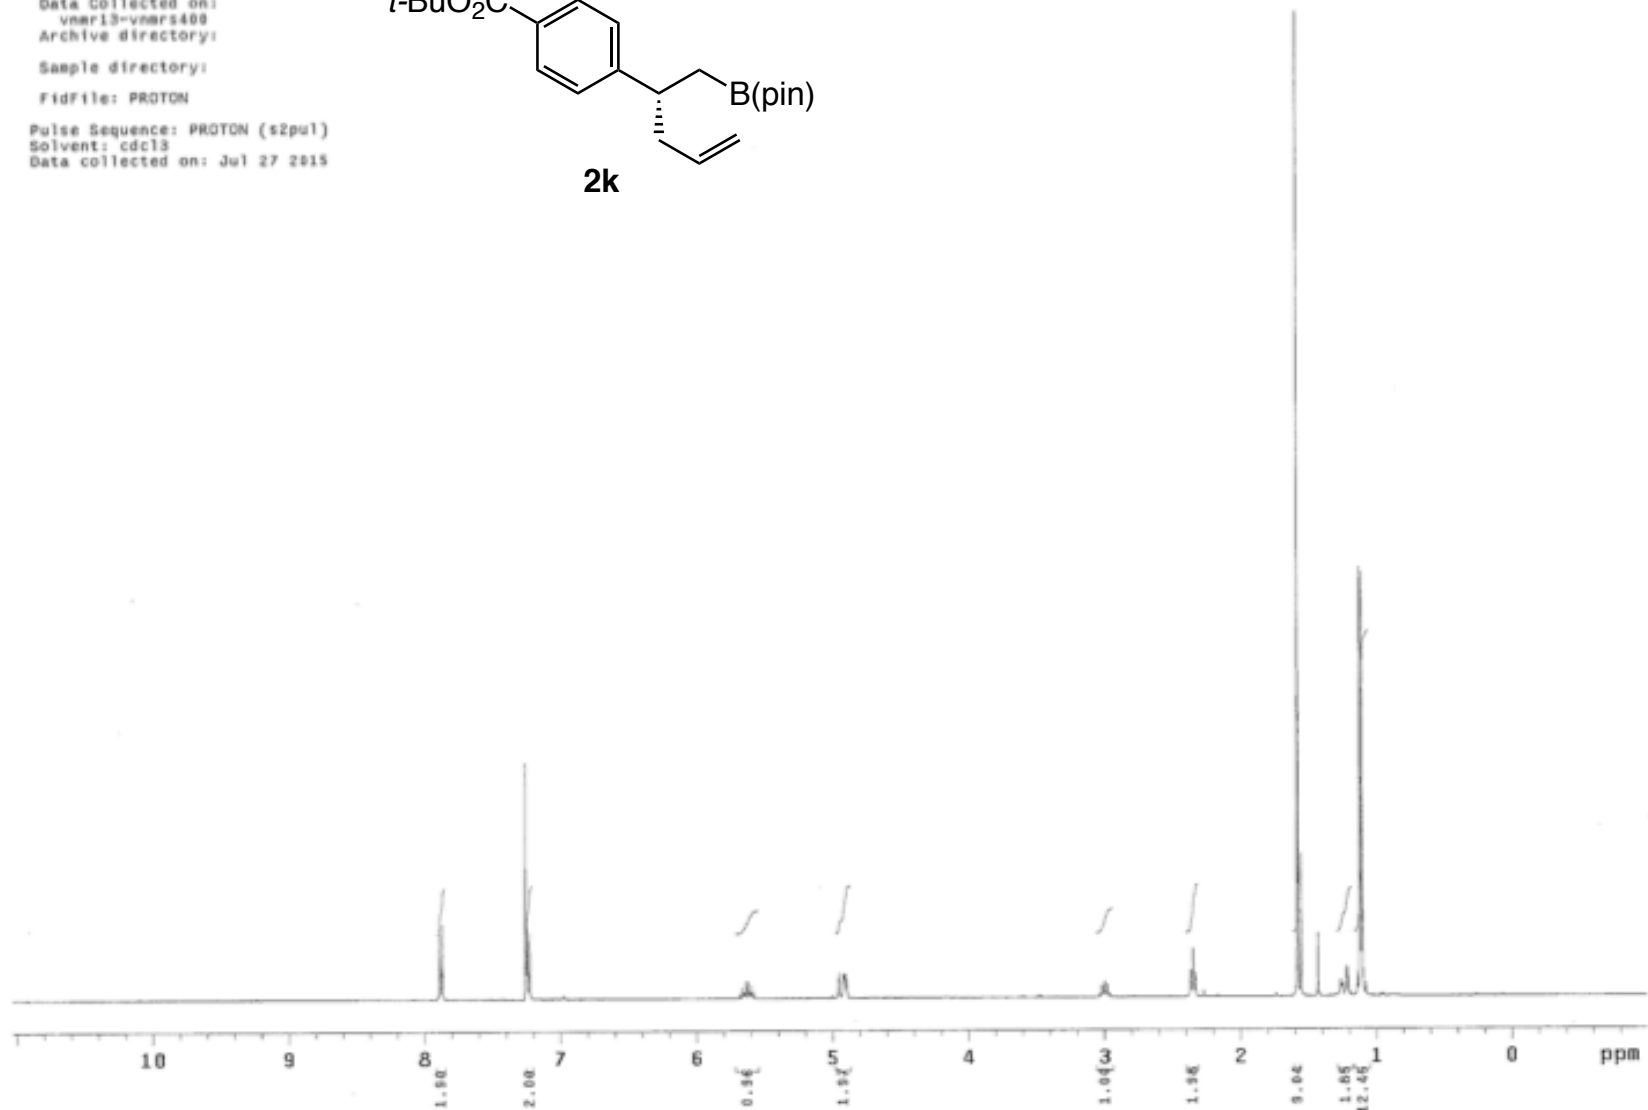

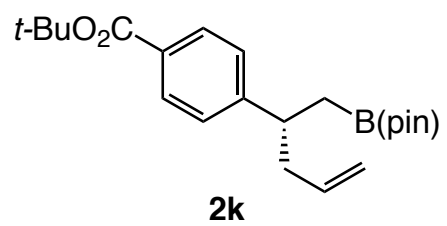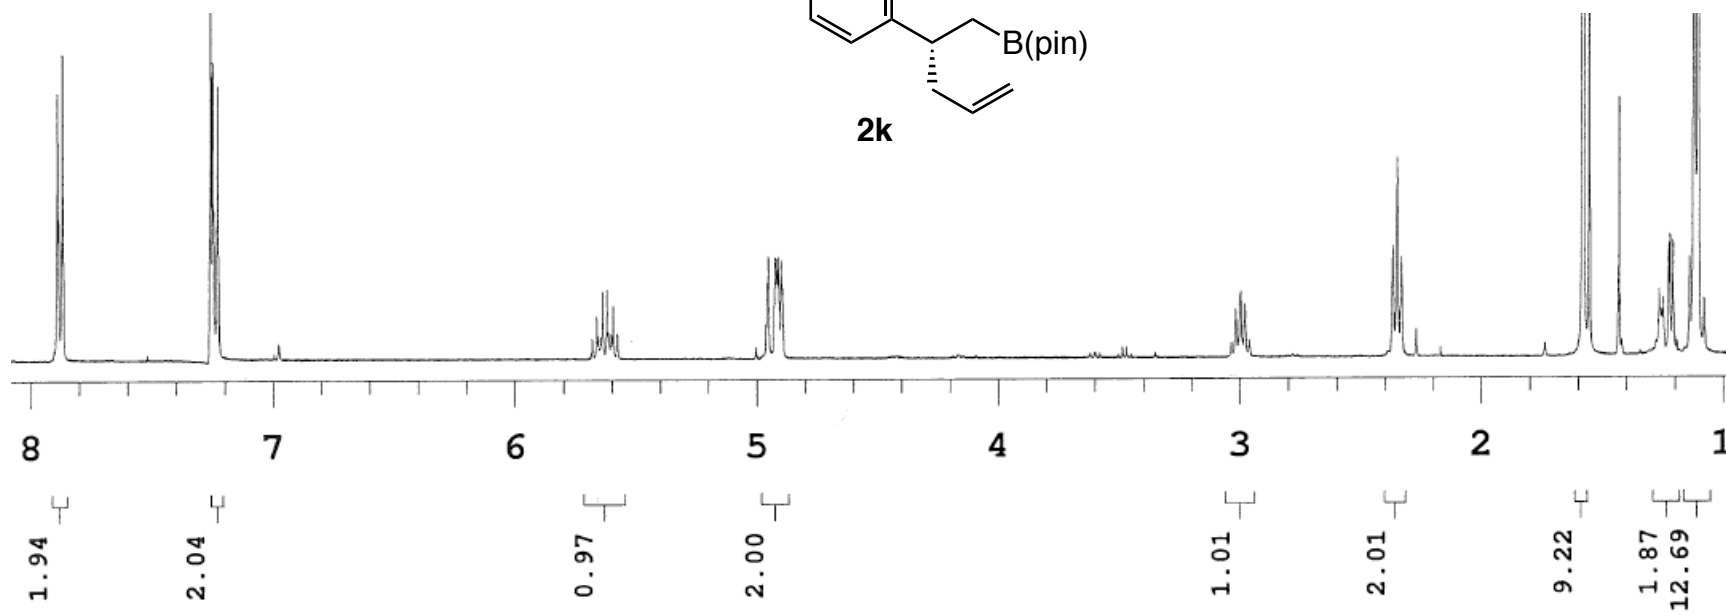



Sample Name:  
SR-V-153-B-carbon  
Data Collected on:  
vnmr13-vnmrs400  
Archive directory:  
Sample directory:  
Fidfile: SR-V-153-carbon  
Pulse Sequence: CARBON (s2pu1)  
Solvent: cdcl3  
Data collected on: Jul 27 2015

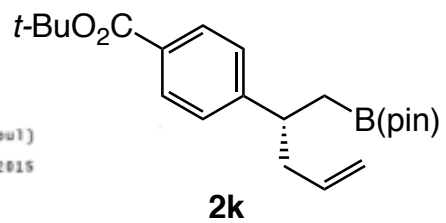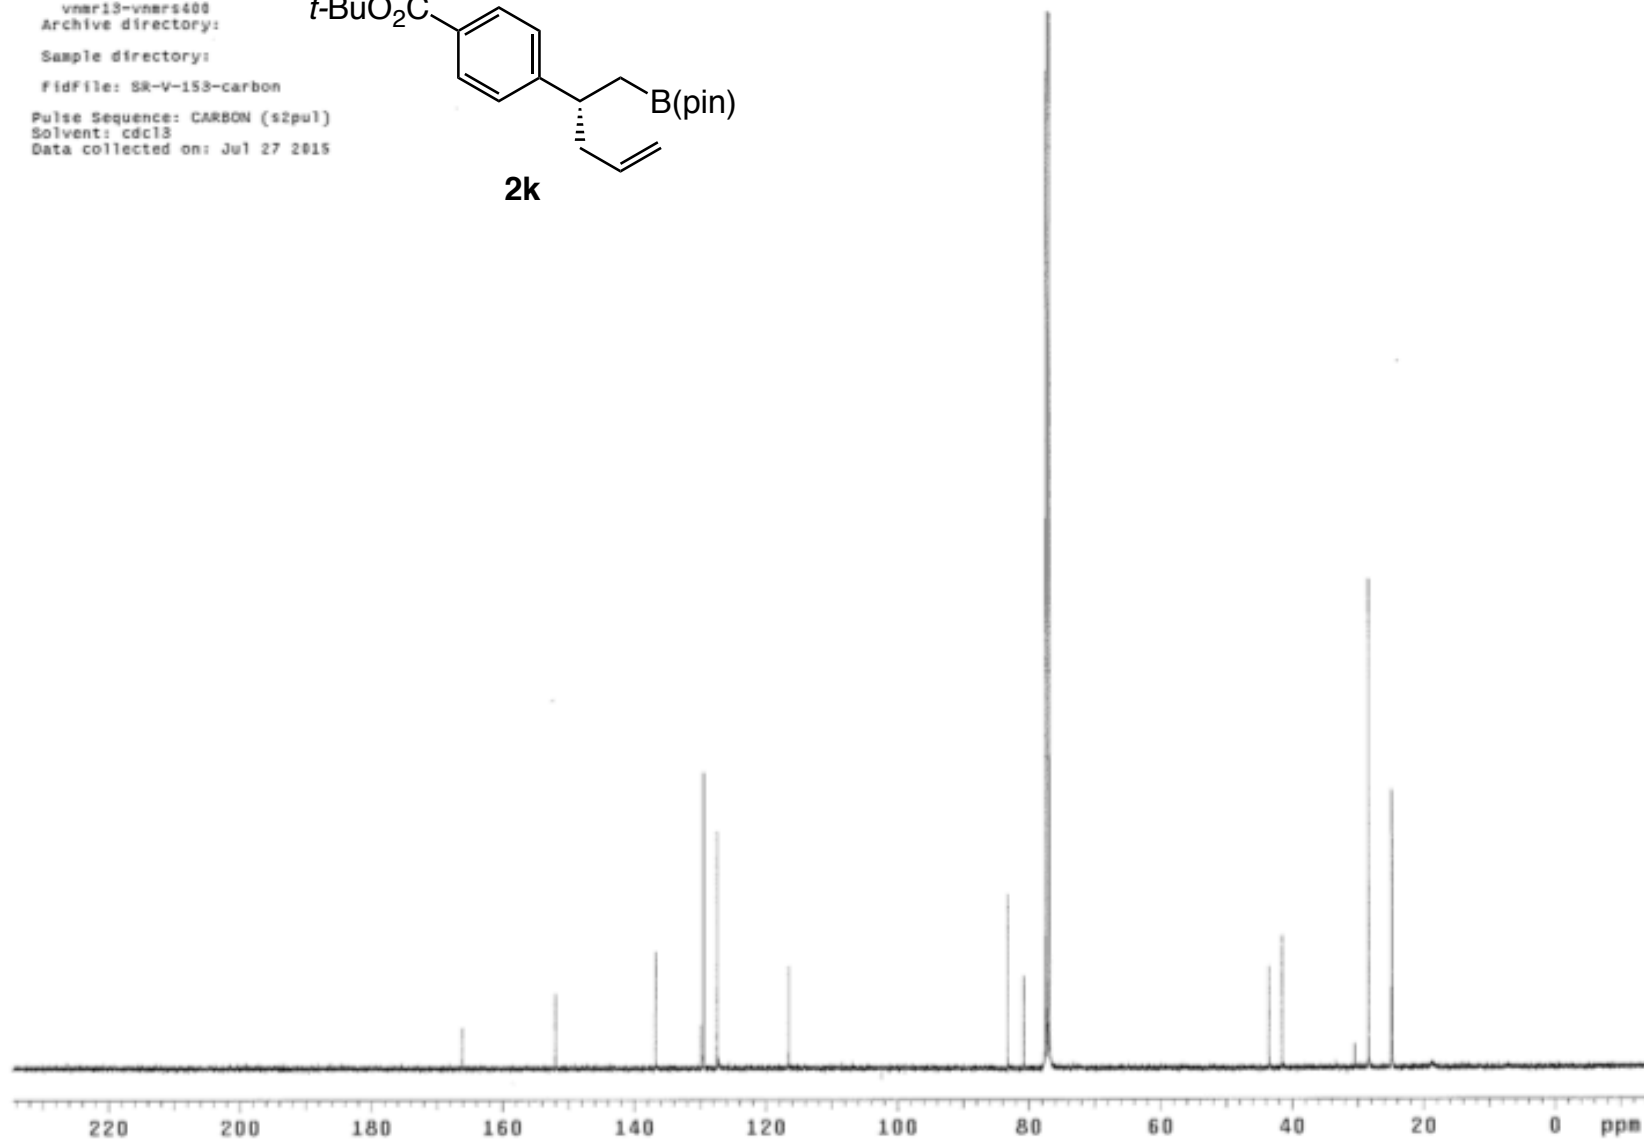

Sample Name:  
SR-IV-278-D-rac  
Data Collected on:  
vnmr13-vnmrs400  
Archive directory:  
Sample directory:  
Fidfile: PROTON  
Pulse Sequence: PROTON (s2pu1)  
Solvent: cdcl3  
Data collected on: Oct 9 2014

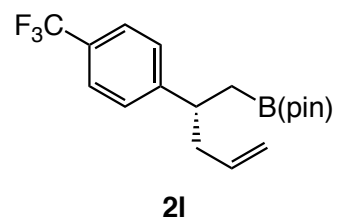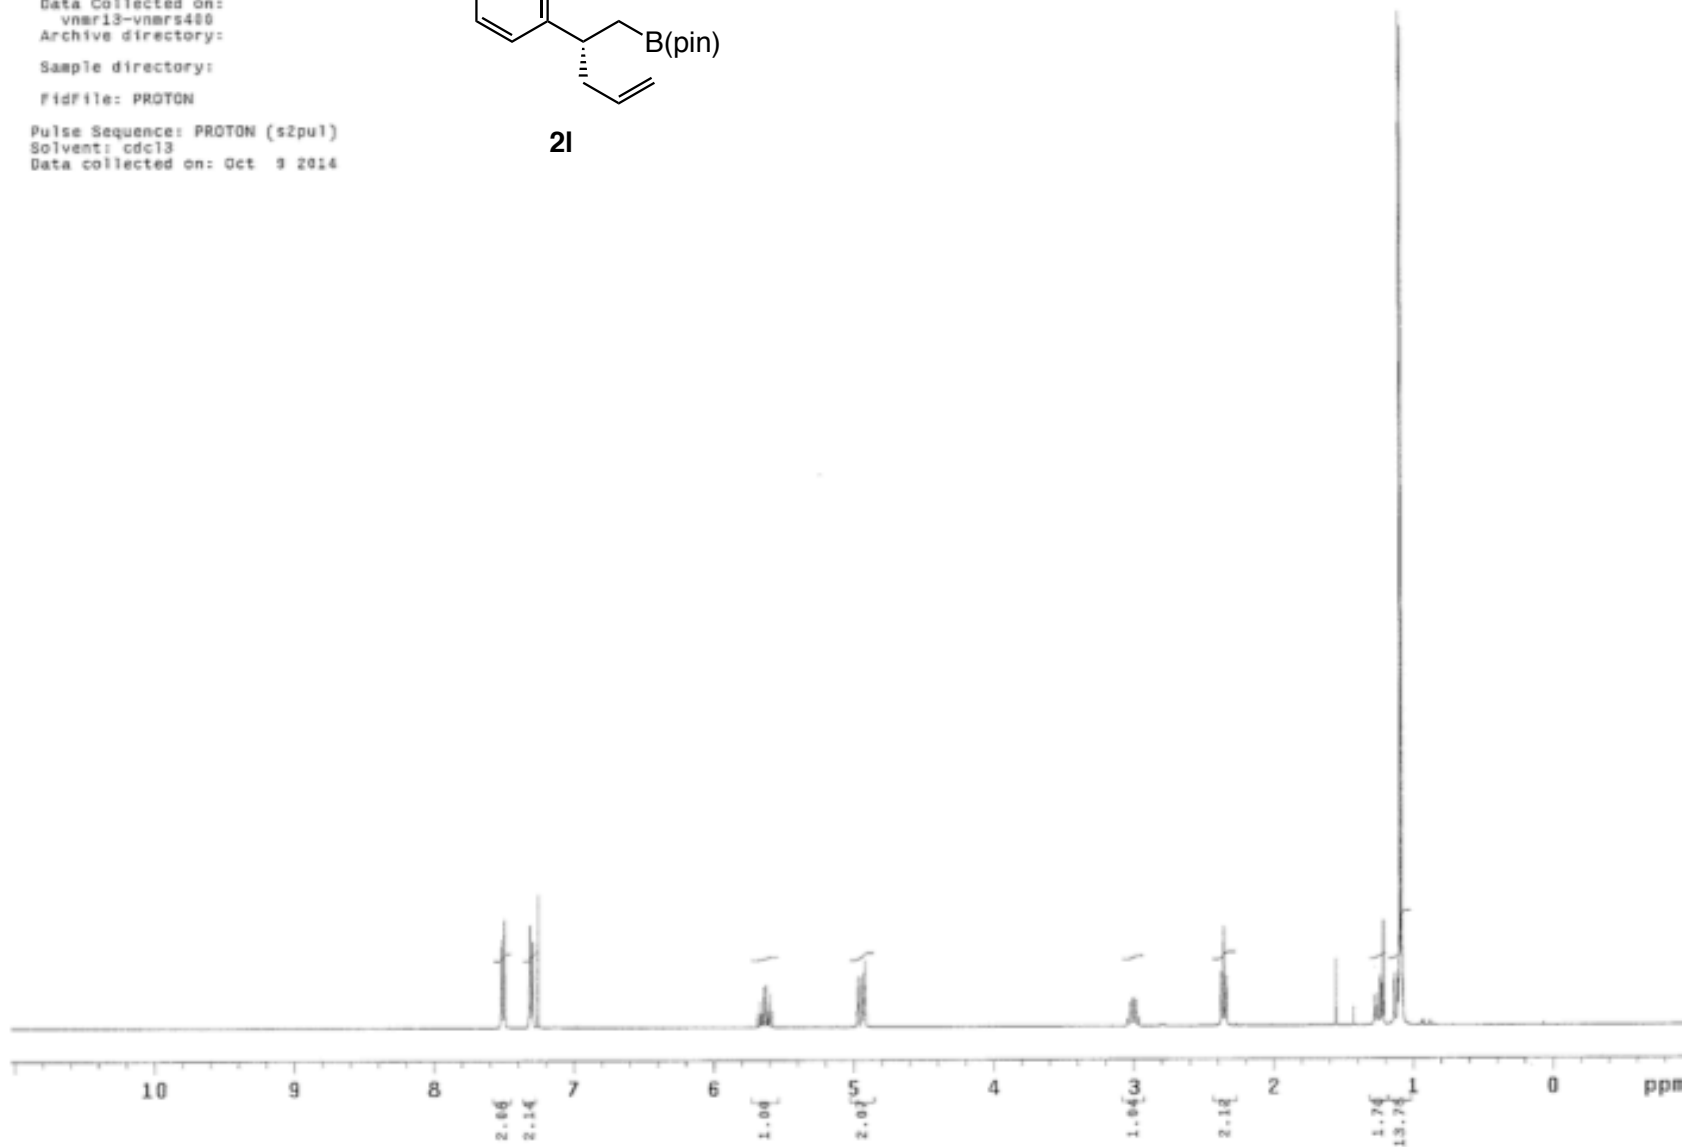

Sample Name:  
 JL-III-237PD  
 Data Collected on:  
 vnr13-vnars488  
 Archive directory:  
 Sample directory:  
 FidFile: PROTON  
 Pulse Sequence: PROTON (s2pu1)  
 Solvent: cdcl3  
 Data collected on: Jun 24 2015

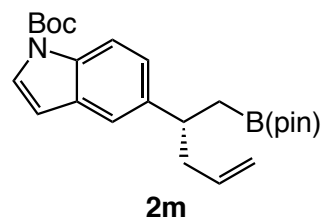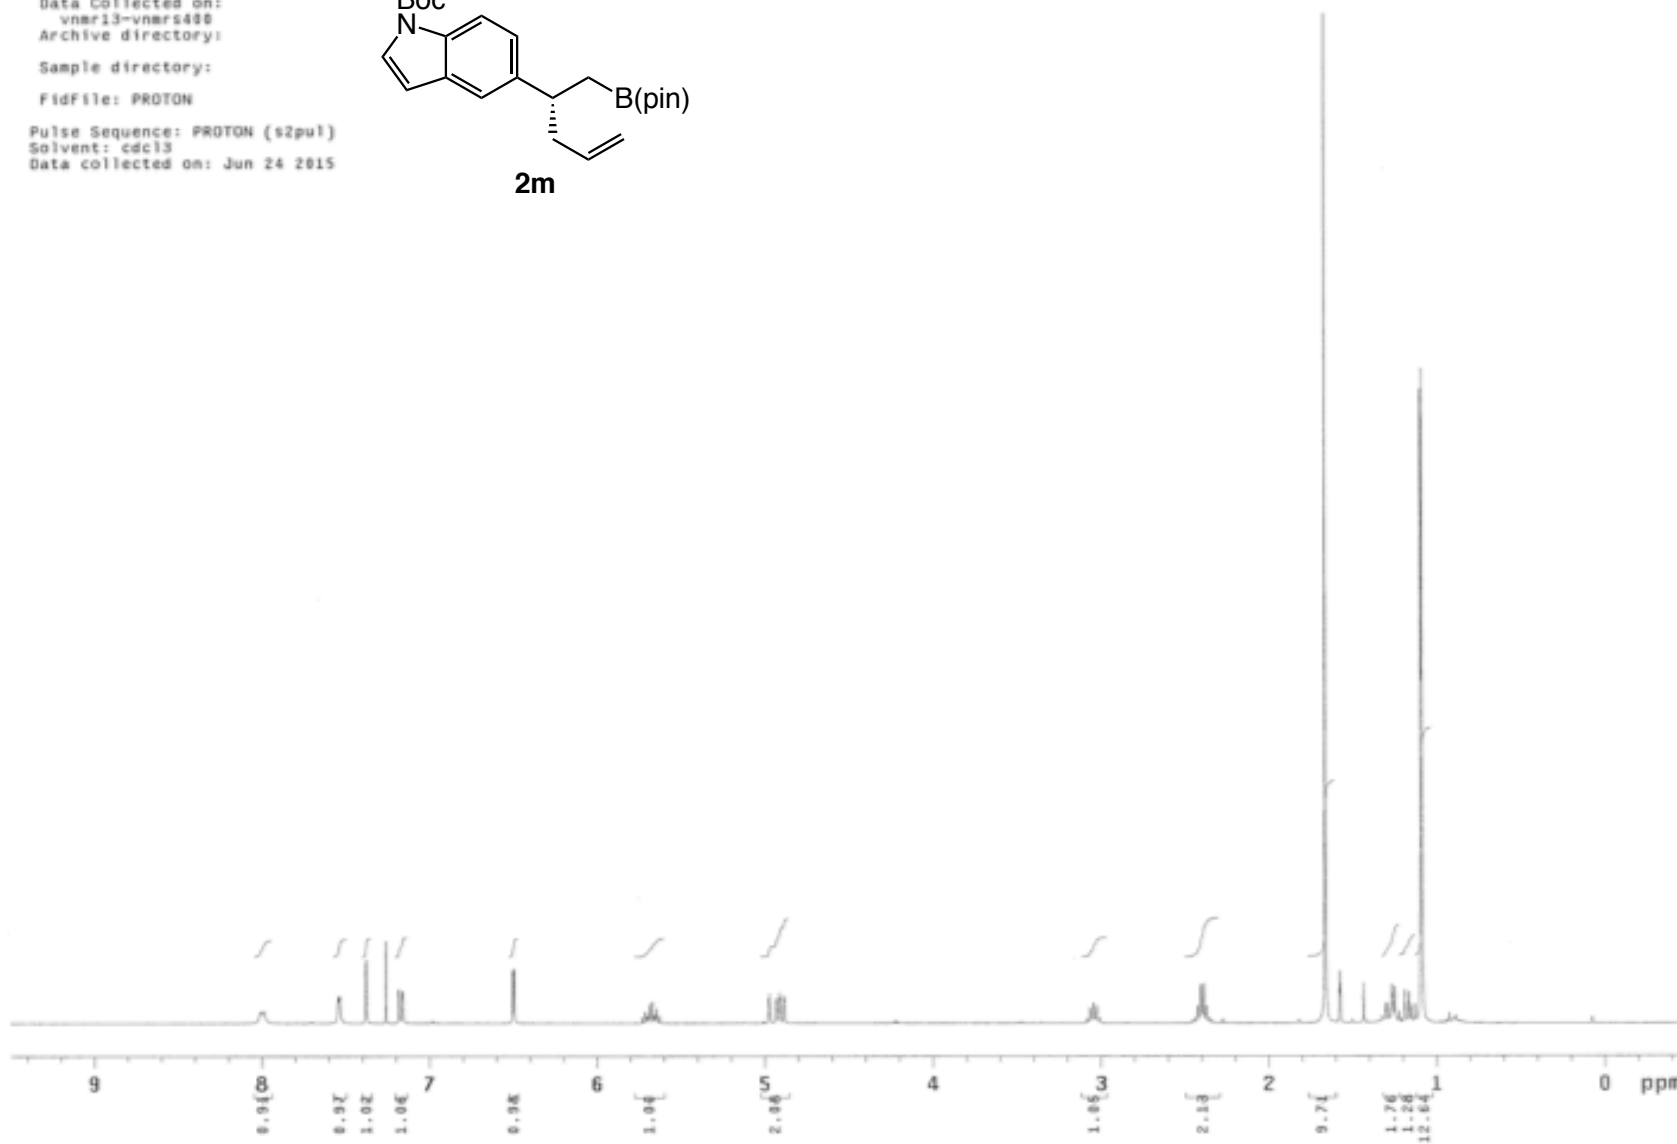

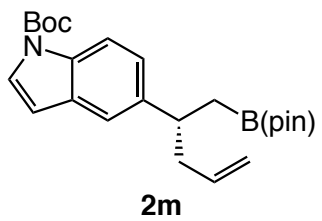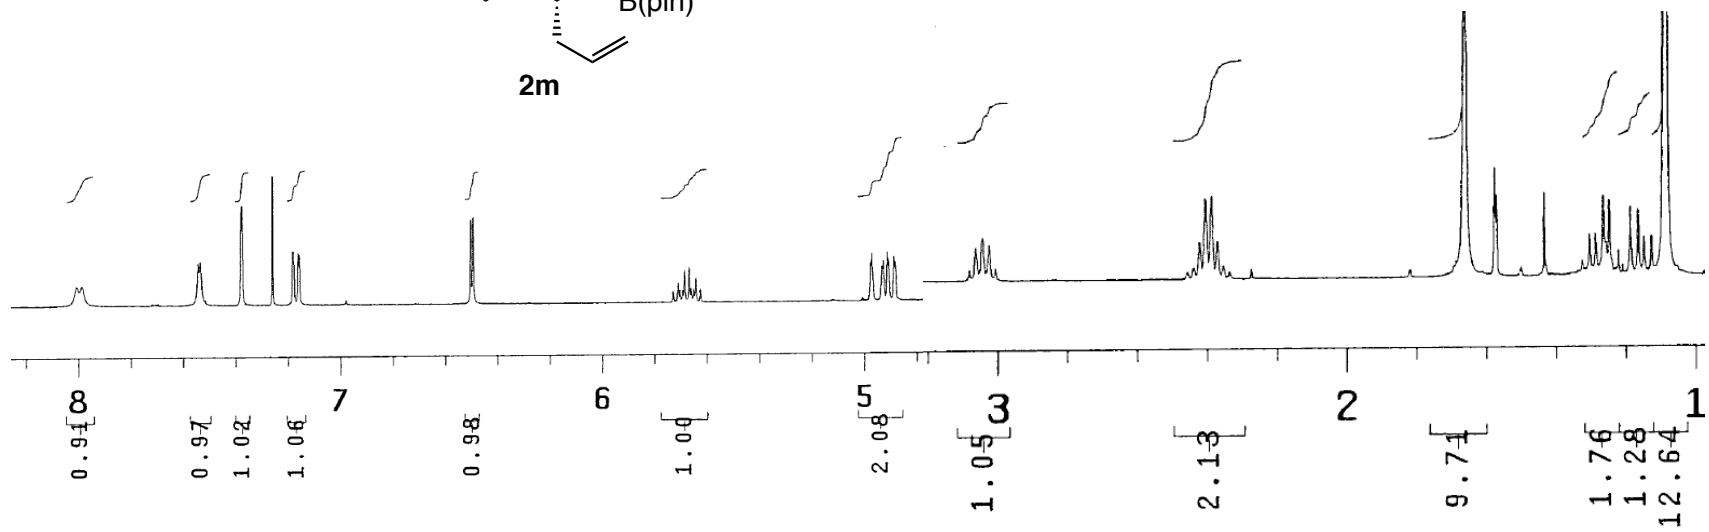

JL-III-237C-PD  
Sample Name:  
JL-III-237C-PD  
Data Collected on:  
vnmr13-vnmrs400  
Archive directory:  
Sample directory:  
FidFile: JL-III-237C-PD2  
Pulse Sequence: CARBON (s2pul)  
Solvent: cdcl3  
Data collected on: Jun 25 2015

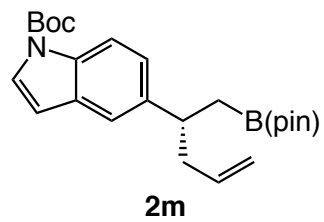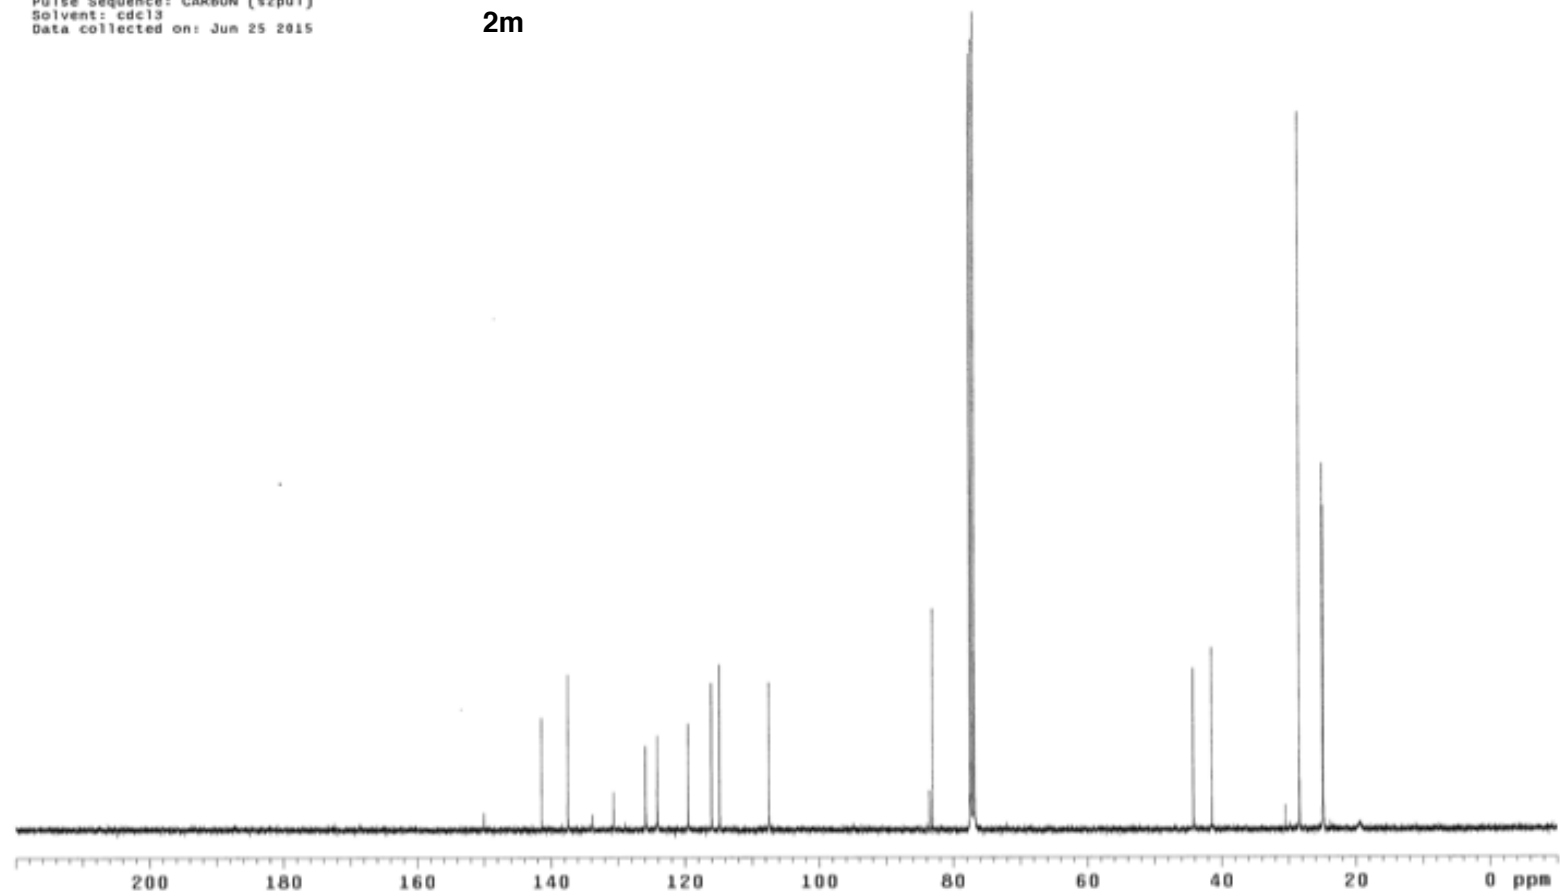

Sample Name:  
SR-V-139  
Data Collected on:  
ner14-vnmrs400  
Archive directory:  
Sample directory:  
FidFile: PROTON  
Pulse Sequence: PROTON (szpu1)  
Solvent: cdcl3  
Data collected on: Jun 20 2015

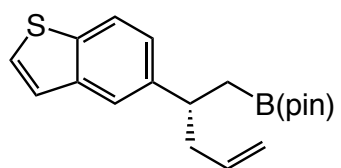

2ah

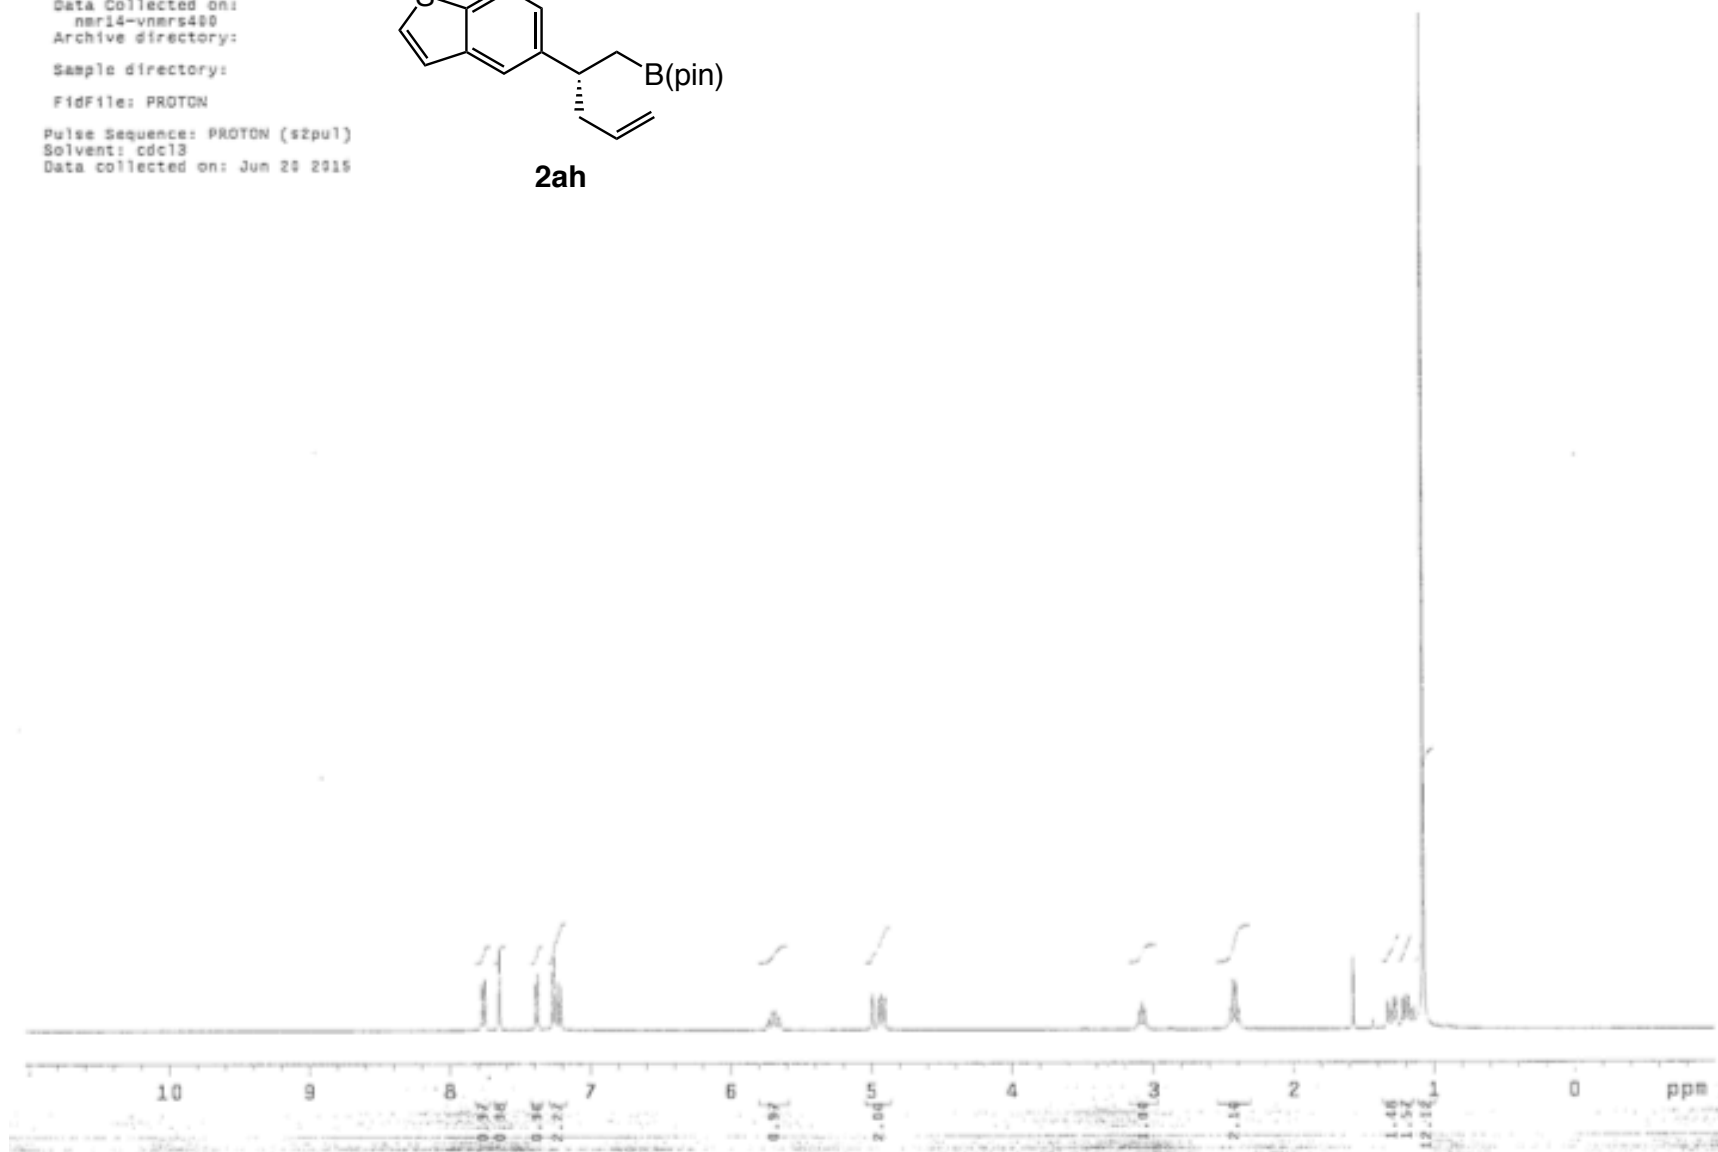

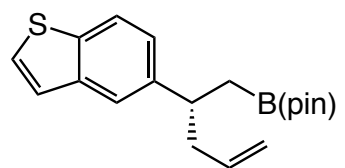

2ah

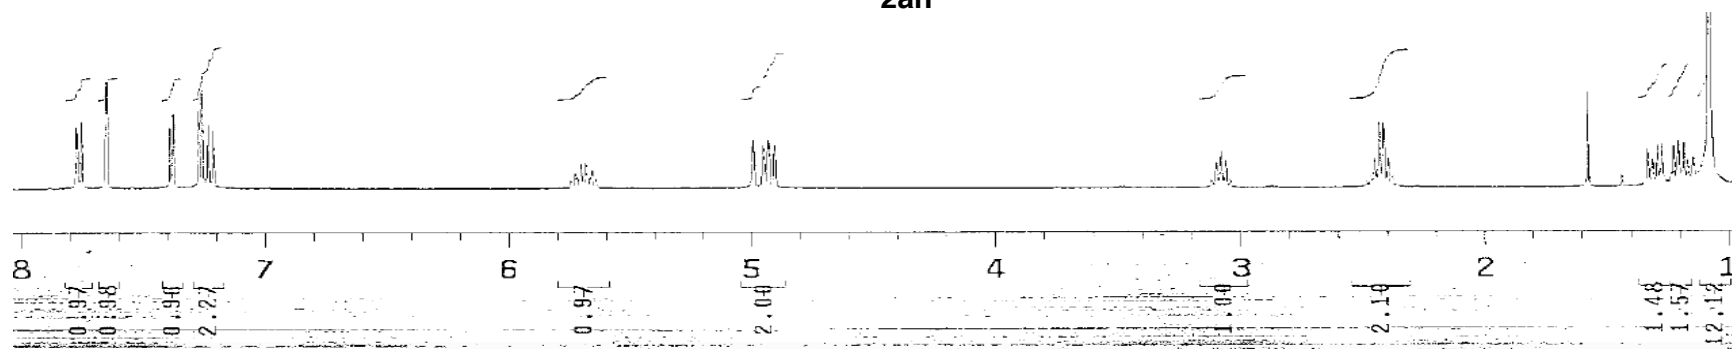

Sample Name: SR-V-139-carbon  
Data Collected on: nmr14-vnmrs400  
Archive directory:  
Sample directory:  
FidFile: CARBON  
Pulse Sequence: CARBON (s2pu1)  
Solvent: cdcl3  
Data collected on: Jun 28 2015

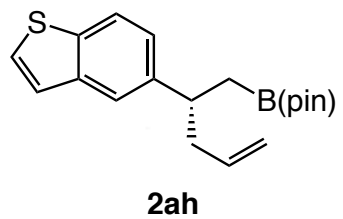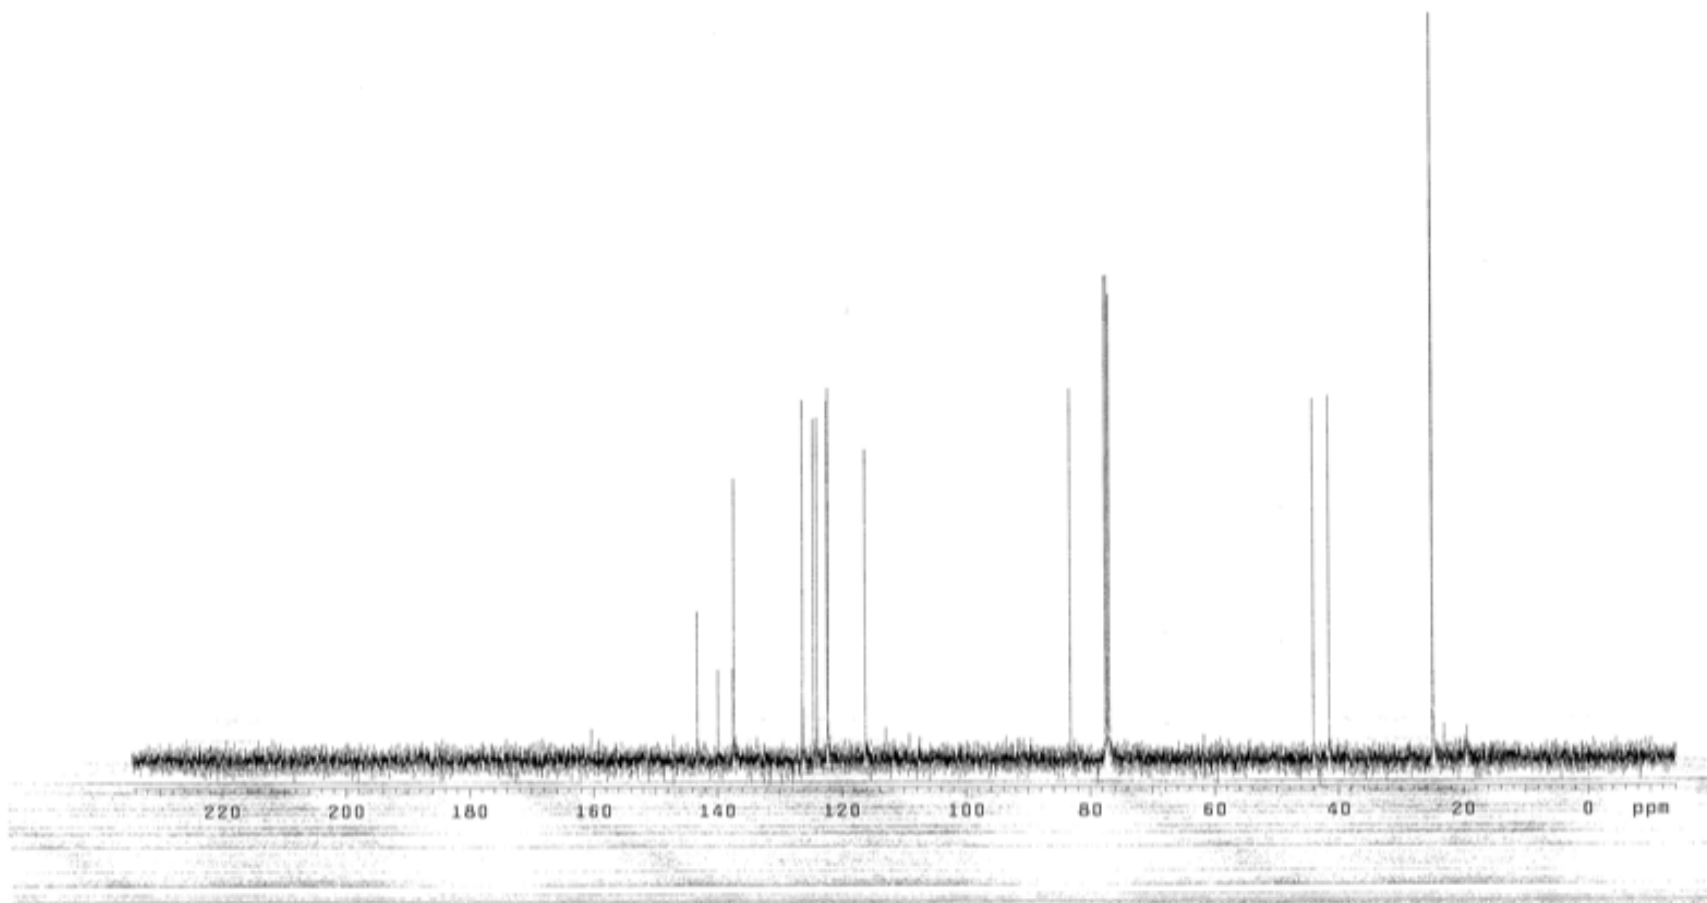



Sample Name:  
 SR-V-104  
 Data Collected on:  
 vnr13-vnms400  
 Archive directory:  
 Sample directory:  
 FidFile: PROTON  
 Pulse Sequence: PROTON (s2pu1)  
 Solvent: cdcl3  
 Data collected on: Apr 17 2015

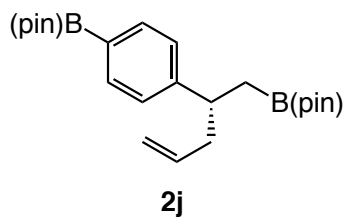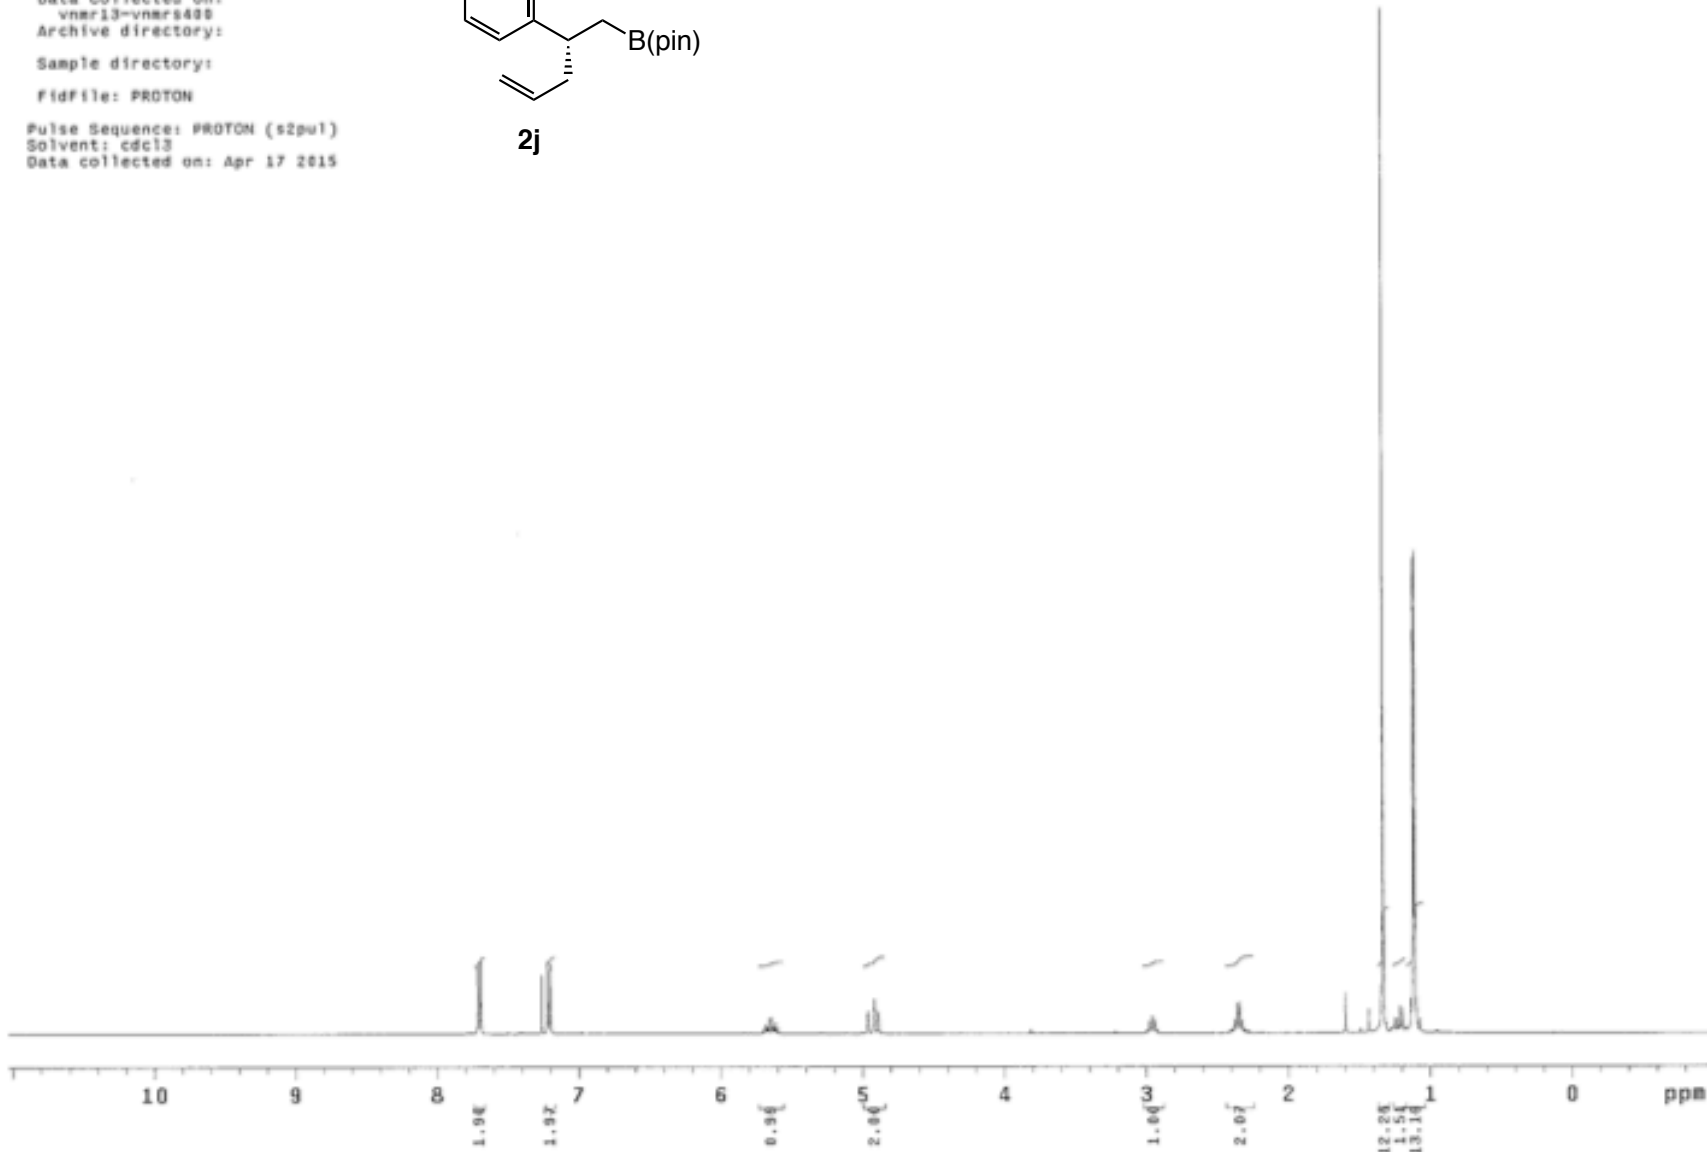

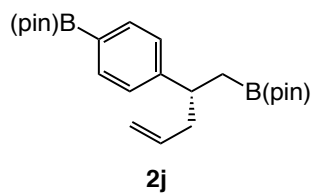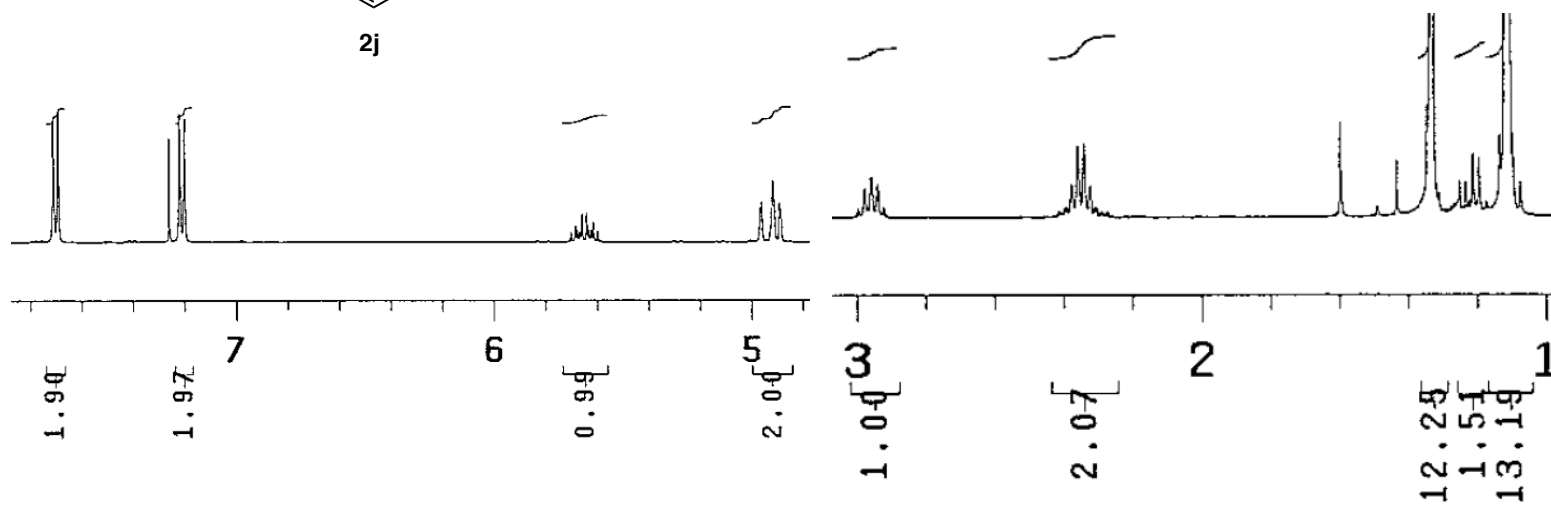

Sample Name: SR-V-104-carbon  
Data Collected on: vnmr13-vnmrs400  
Archive directory:  
Sample directory:  
FidFile: CARBON  
Pulse Sequence: CARBON (s2pu1)  
Solvent: cdcl3  
Data collected on: Apr 17 2015

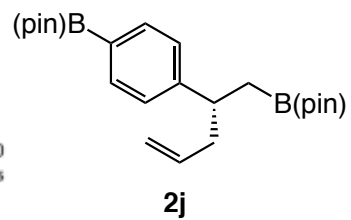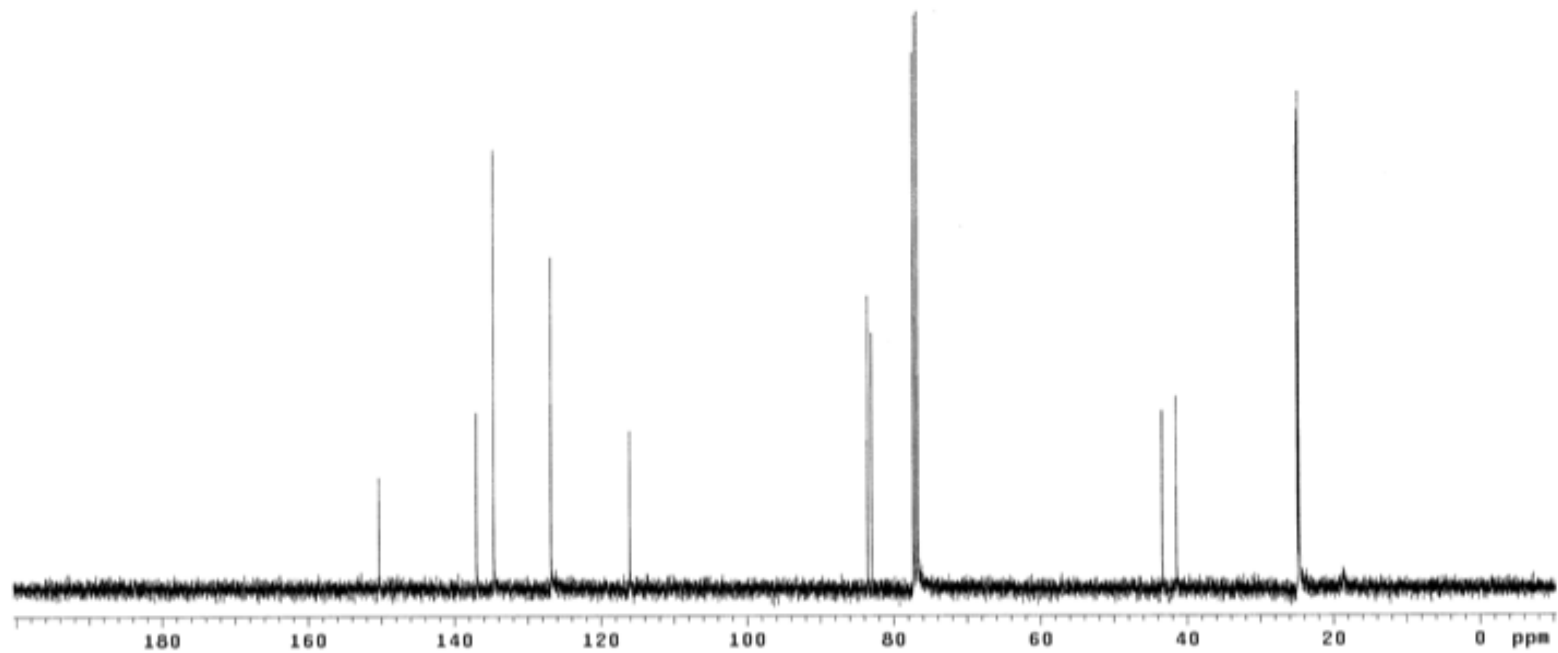

Sample Name:  
 SR-V-111-pTLC  
 Data Collected on:  
 vnmr13-vnmrs400  
 Archive directory:  
 Sample directory:  
 FidFile: SR-V-111-pTLC  
 Pulse Sequence: PROTON (s2pu1)  
 Solvent: cdcl3  
 Data collected on: Apr 25 2015

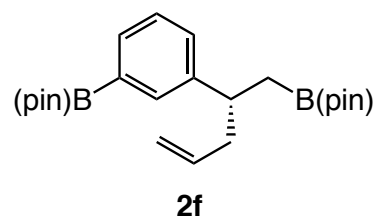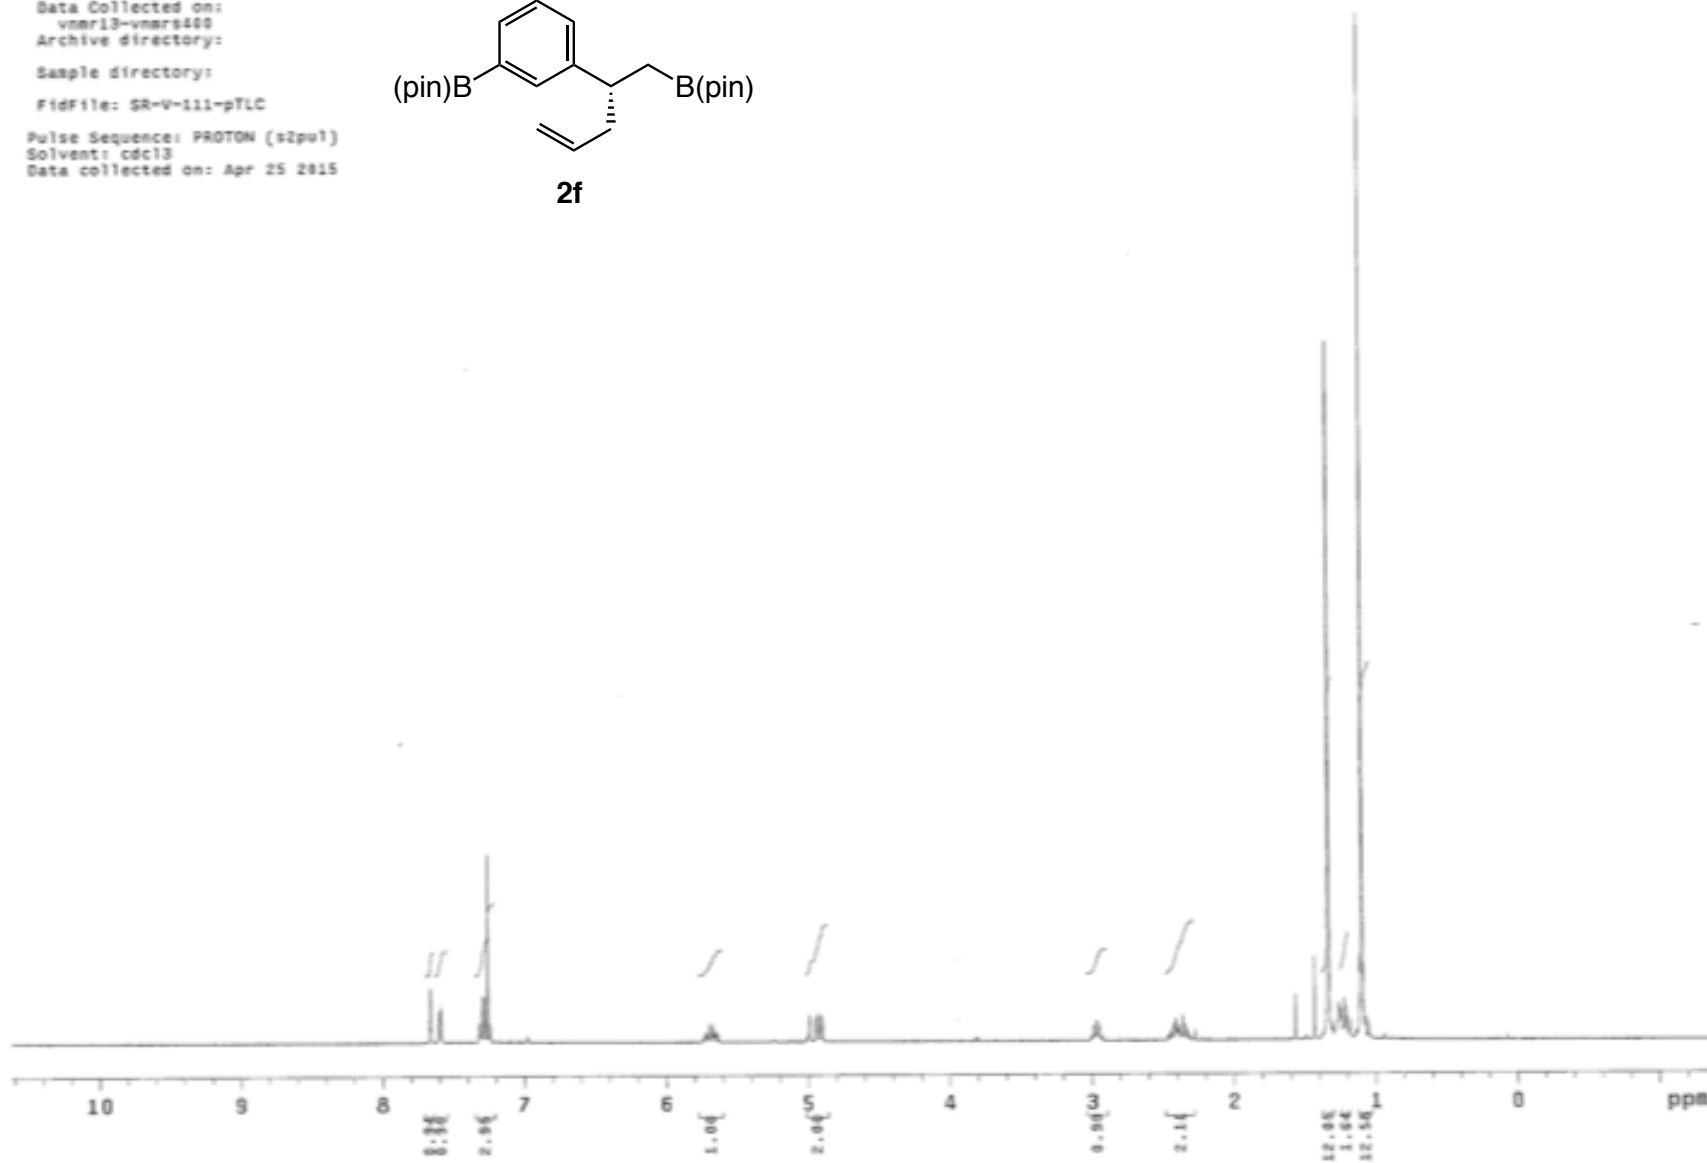

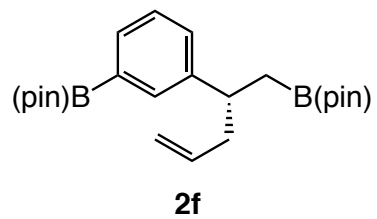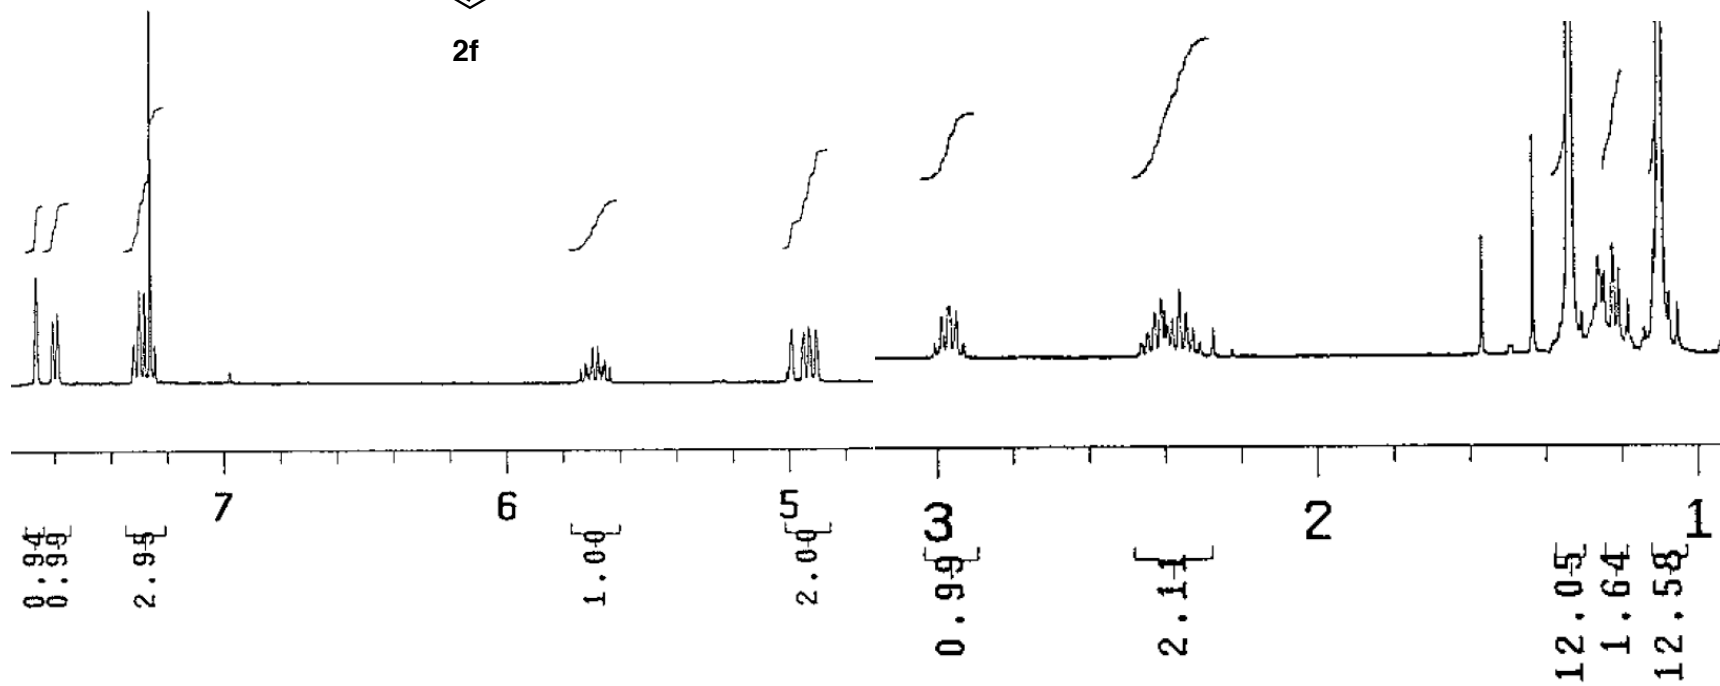

Sample Name: SR-V-111-carbon  
Data Collected on: vnr13-vnr5488  
Archive directory:  
Sample directory:  
FidFile: CARBON  
Pulse Sequence: CARBON (s2pu1)  
Solvent: cdcl3  
Data collected on: Apr 25 2015

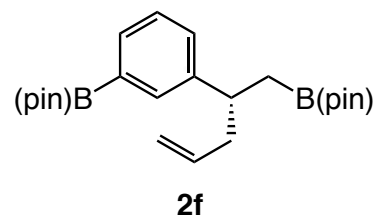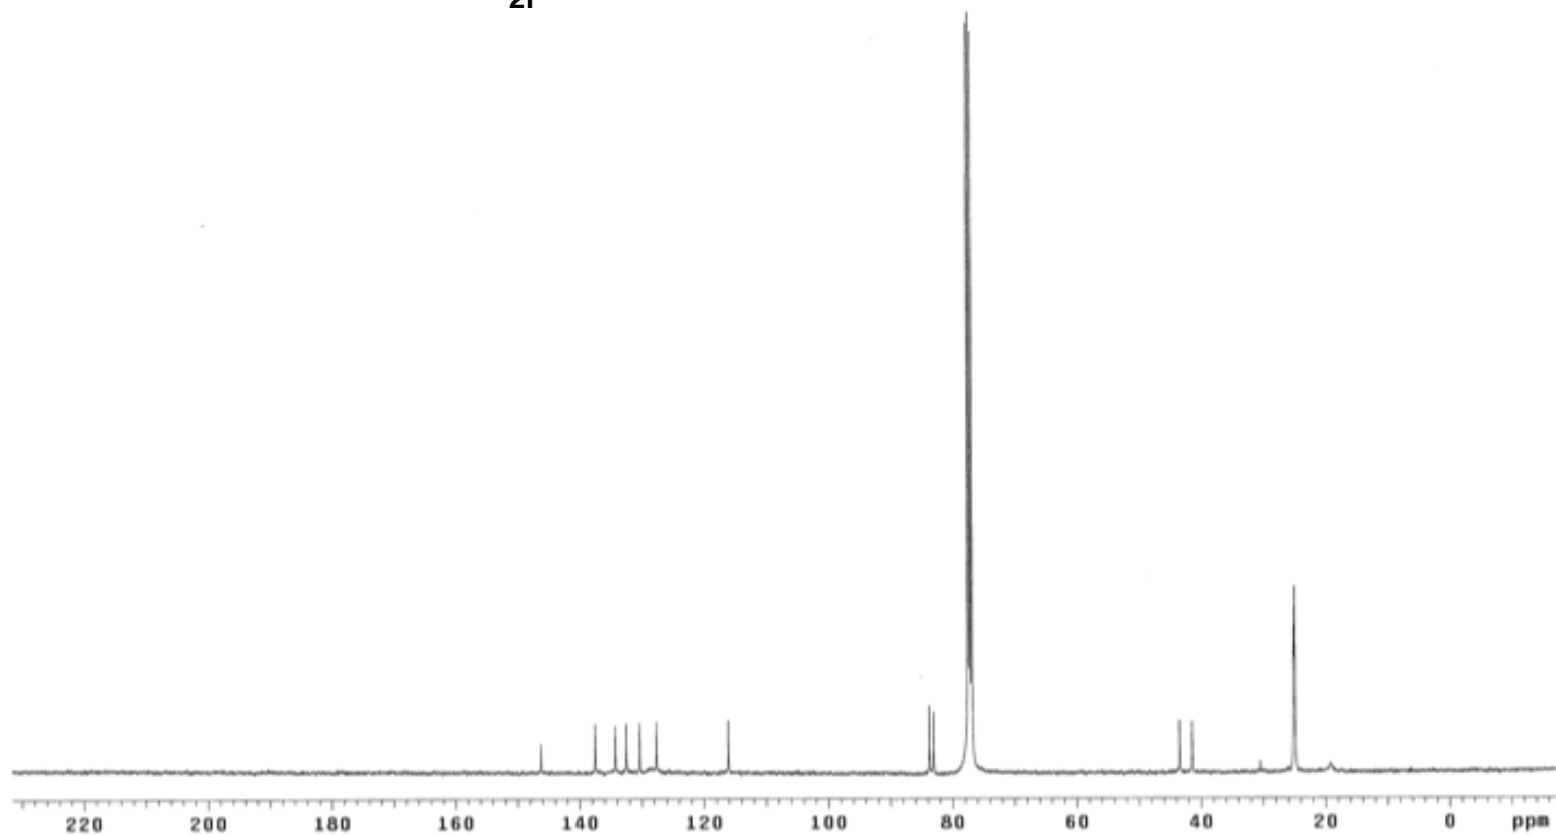

Sample Name:  
 JL-III-195P0-1  
 Data Collected on:  
 vnmr13-vnmrs460  
 Archive directory:  
 Sample directory:  
 Fidfile: PROTON  
 Pulse Sequence: PROTON (s2pu1)  
 Solvent: cdcl3  
 Data collected on: May 21 2015

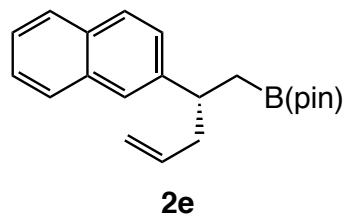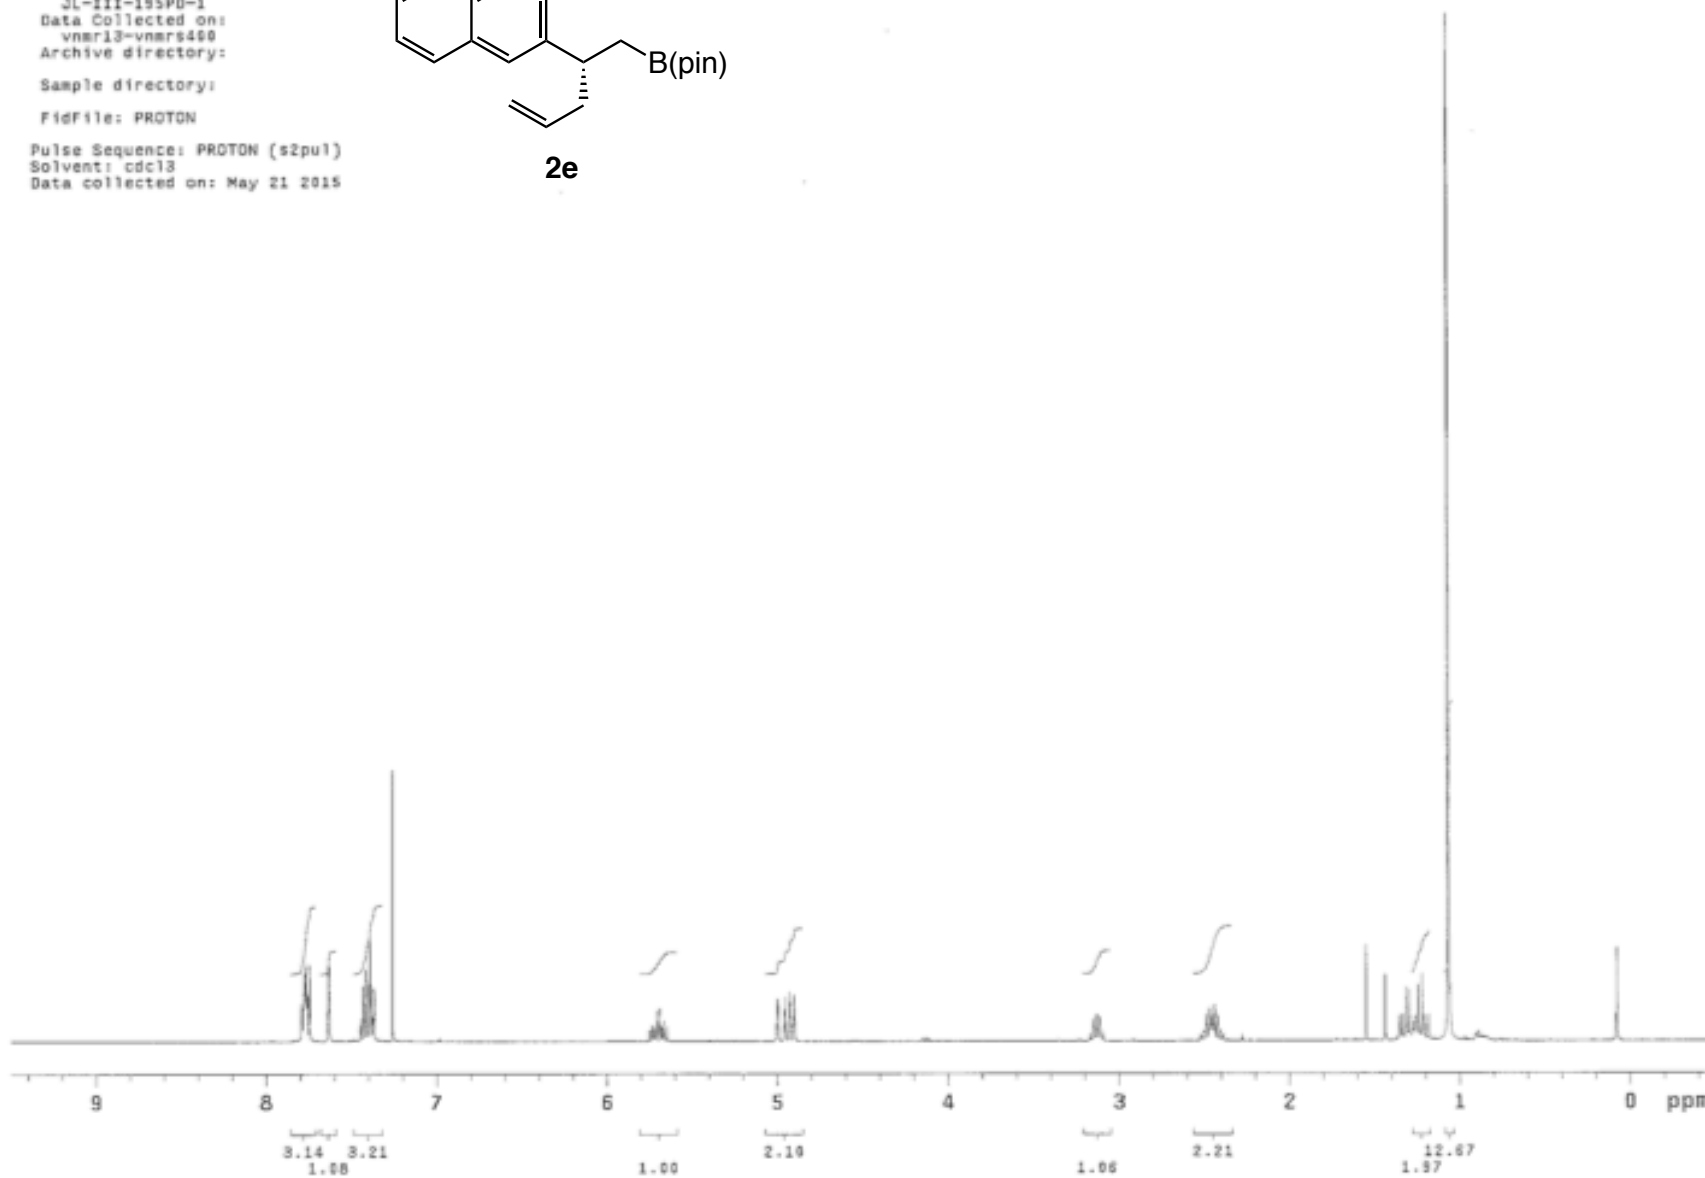

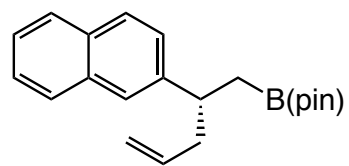

**2e**

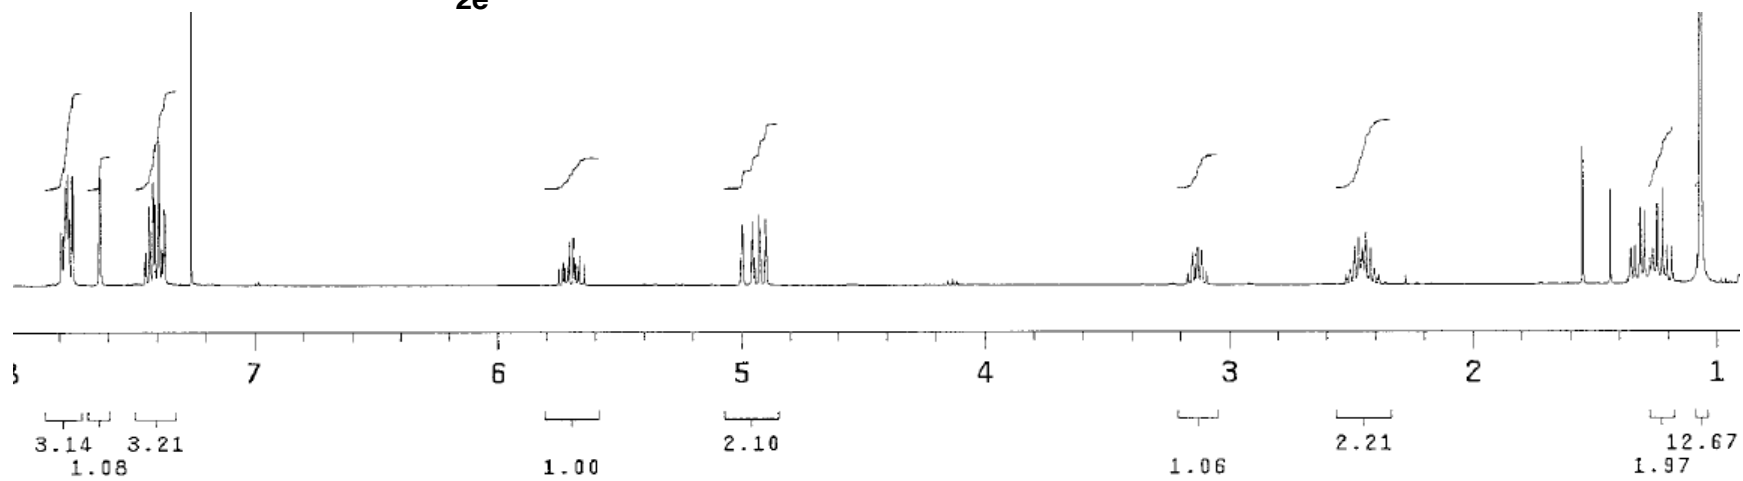



JL-III-195-C-PD  
Sample Name:  
JL-III-195-C-PD  
Data Collected on:  
vnmr13-vnmrs480  
Archive directory:  
Sample directory:  
FidFile: JL-III-195PD-C  
Pulse Sequence: CARBON [s2pu1]  
Solvent: cdcl3  
Data collected on: May 22 2015

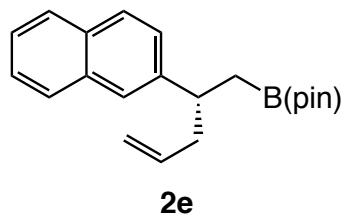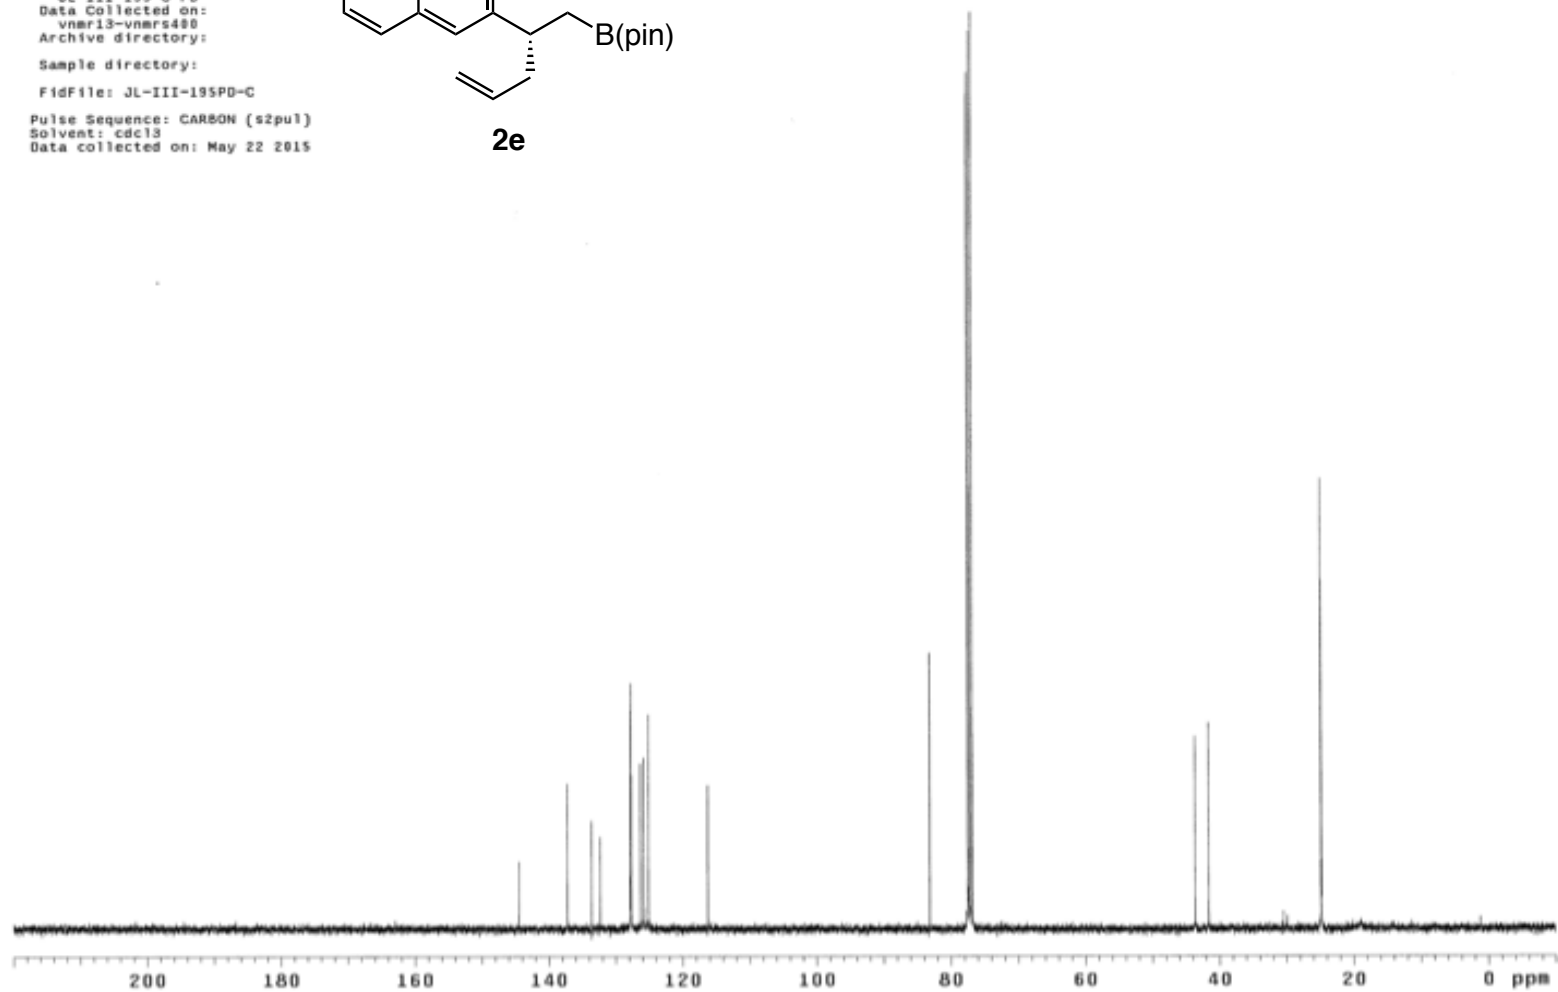

Sample Name:  
 SK-IV-292  
 Data Collected on:  
 vnmr13-vnmrs400  
 Archive directory:  
 Sample directory:  
 FidFile: PROTON  
 Pulse Sequence: PROTON (s2pu1)  
 Solvent: cdcl3  
 Data collected on: Oct 28 2014

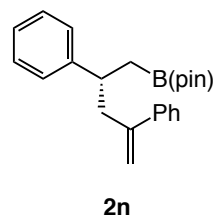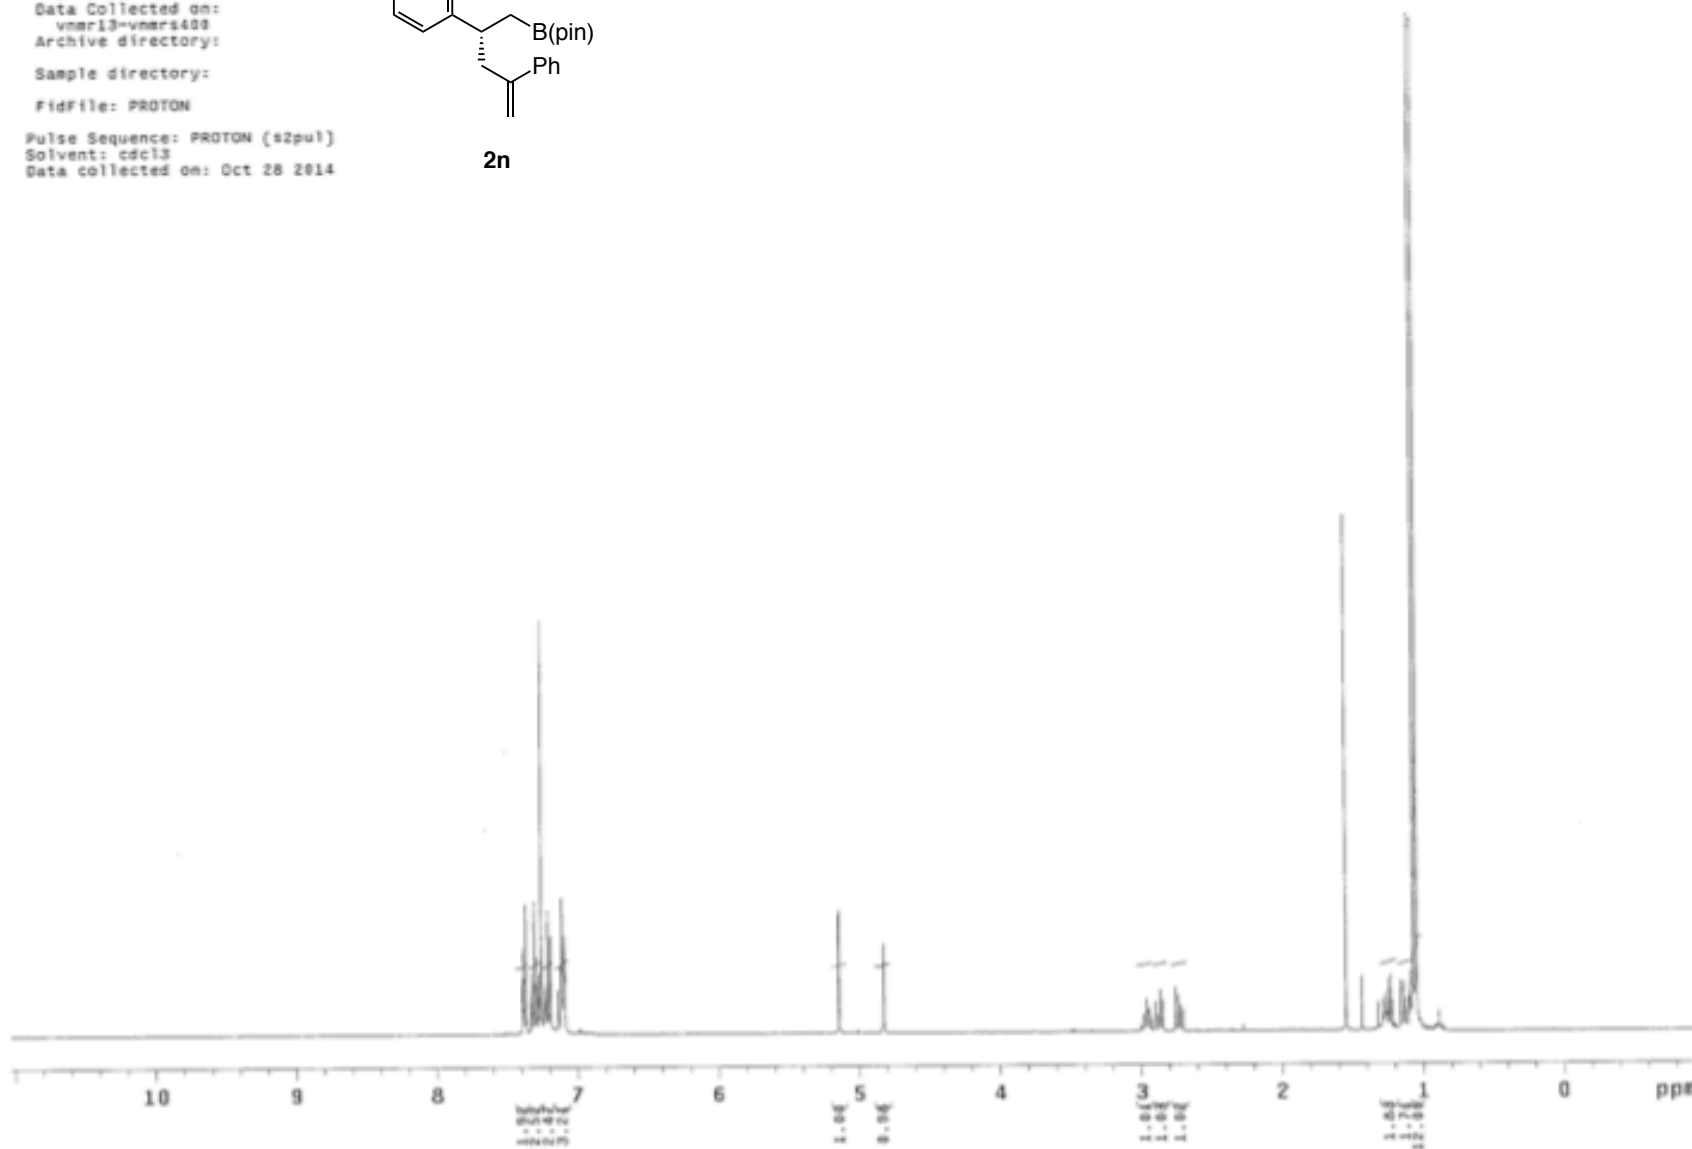

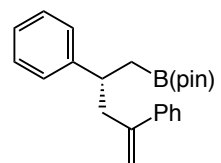

2n

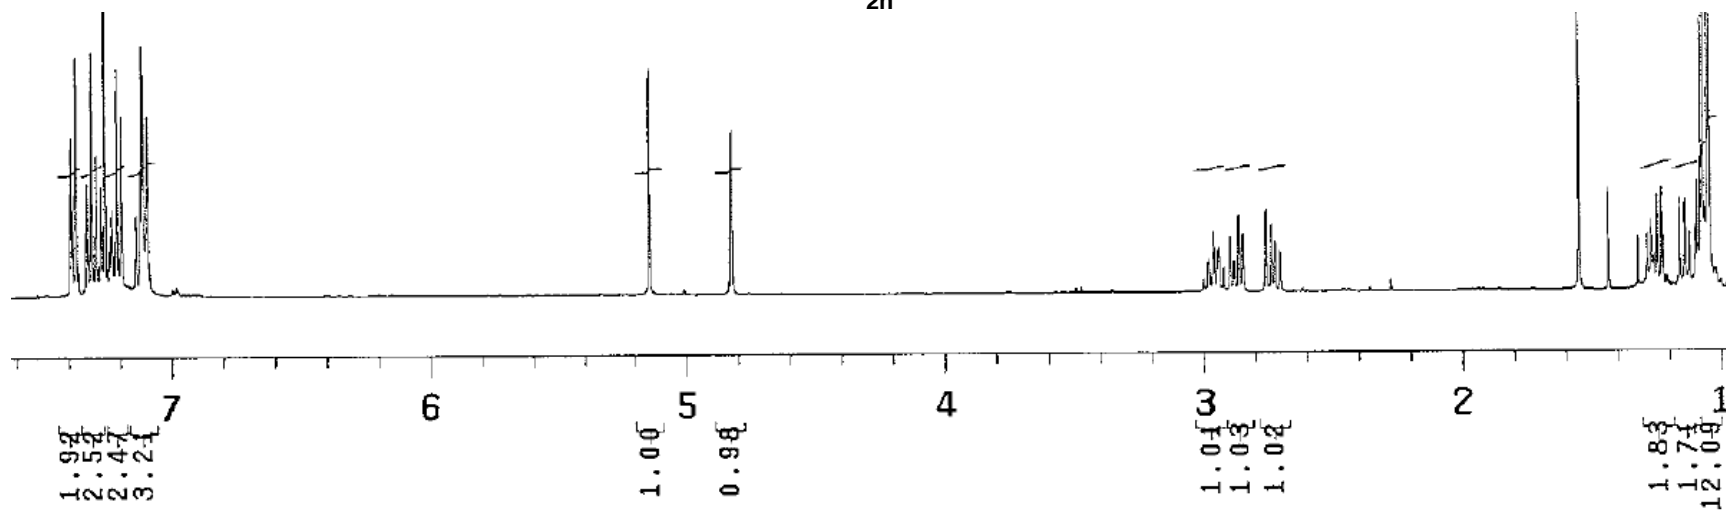

Sample Name:  
SR-IV-292-carbon  
Data Collected on:  
vnmr13-vnmrs400  
Archive directory:  
Sample directory:  
FidFile: SR-IV-292-carbon  
Pulse Sequence: CARBON (s2pu1)  
Solvent: cdCl3  
Data collected on: Oct 28 2014

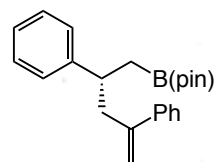

2n

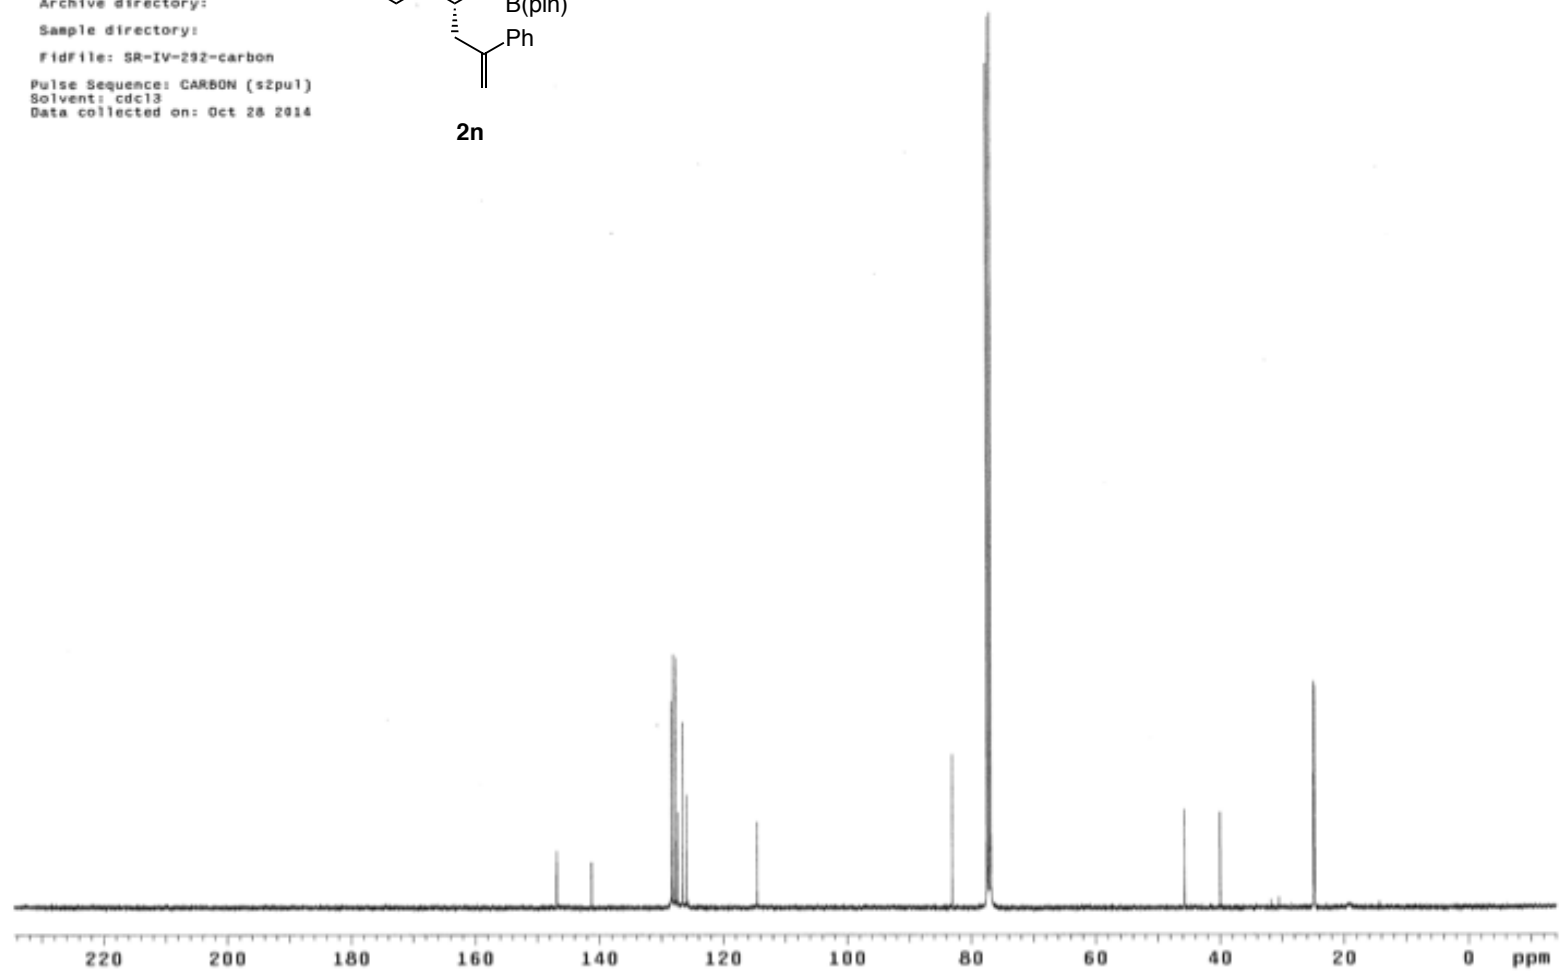

Sample Name:

Data Collected on:

vnmr13-vnmrs400

Archive directory:

Sample directory:

FidFile: Ph-Me-product

Pulse Sequence: PROTON (szpu1)

Solvent: cdcl3

Data collected on: Jan 13 2015

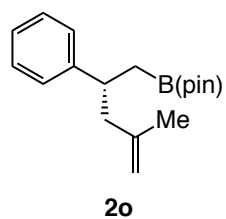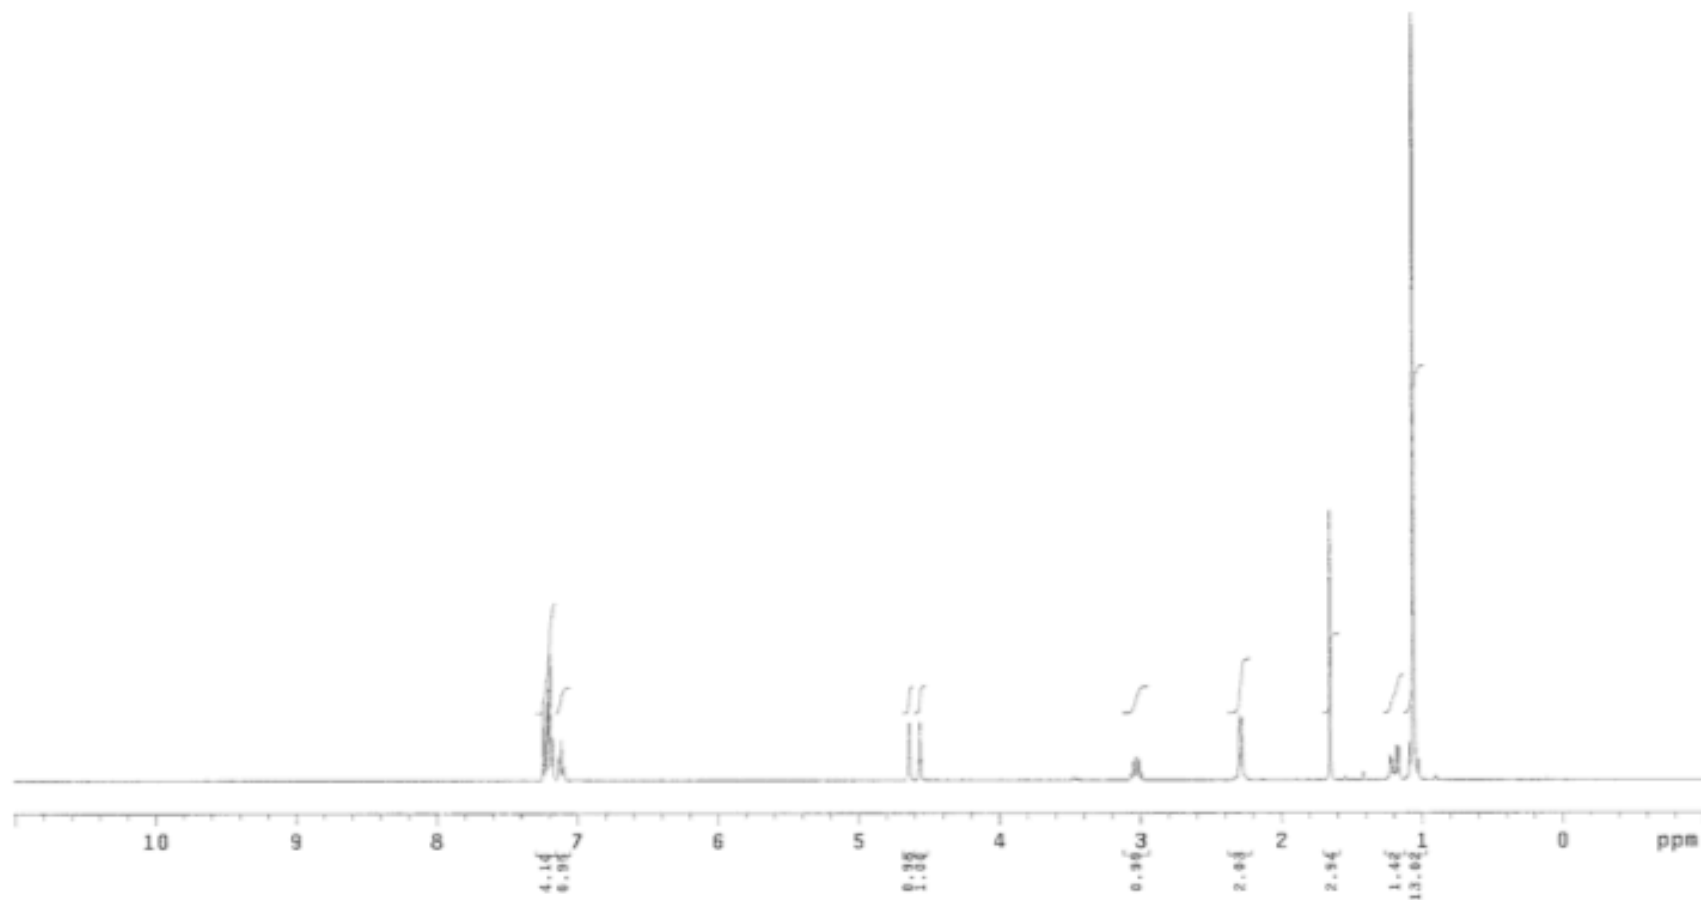

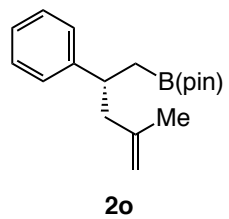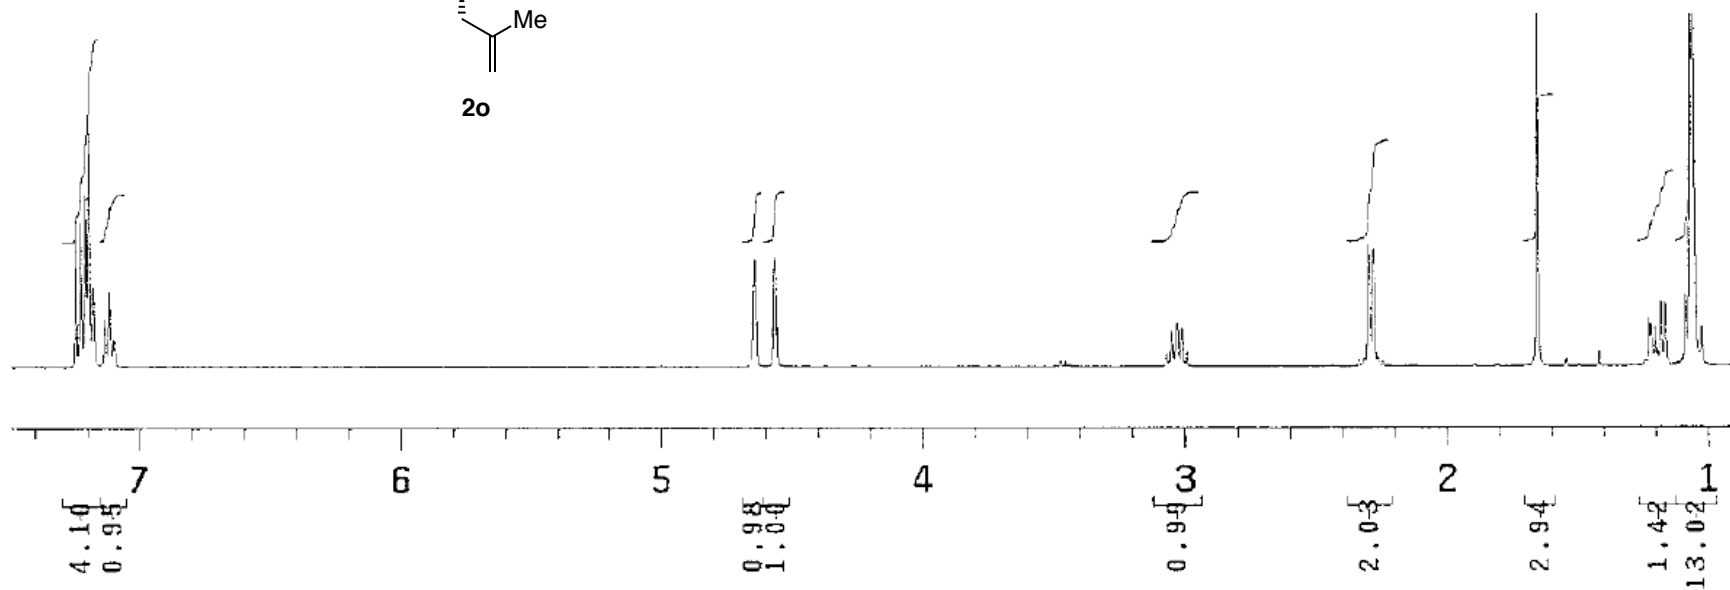

Sample Name:  
Data Collected on:  
vnmr13-vnmrs400  
Archive directory:  
Sample directory:  
FidFile: CARBON  
Pulse Sequence: CARBON (s2pu1)  
Solvent: cdcl3  
Data collected on: Jan 13 2015

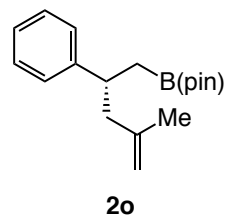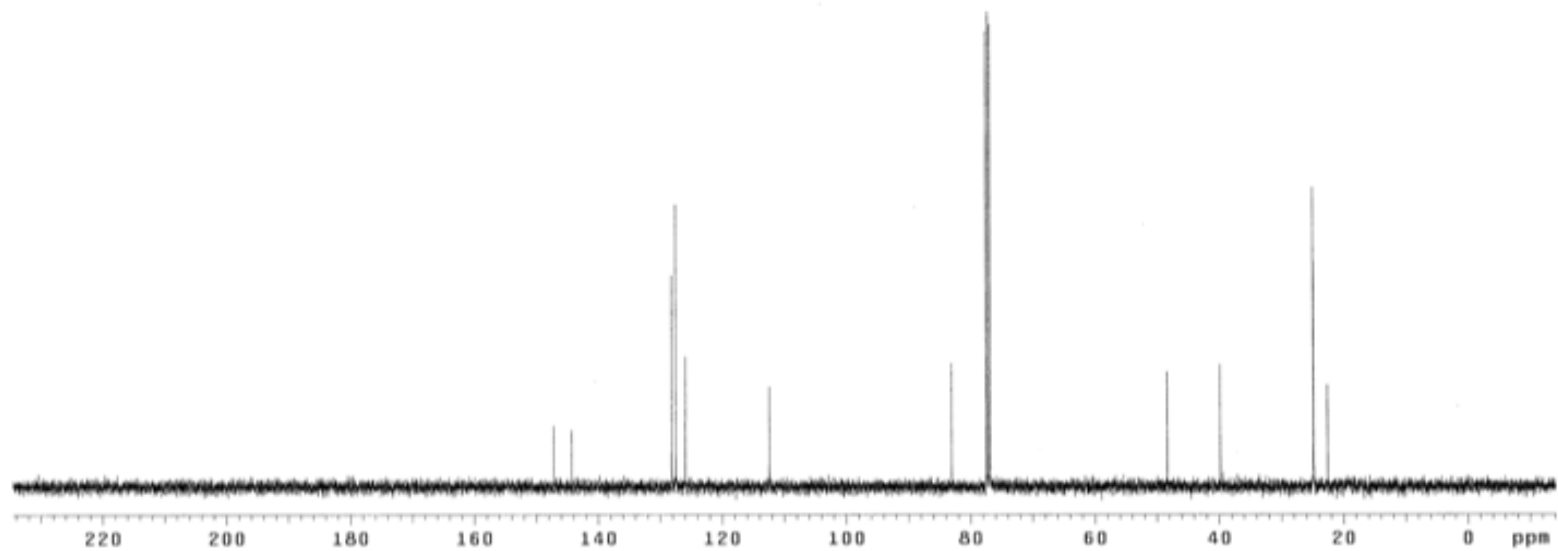

Sample Name:  
SR-IV-302  
Data Collected on:  
vnmr13-vnmrs408  
Archive directory:  
Sample directory:  
Fidfile: PROTON  
Pulse Sequence: PROTON (s2pu1)  
Solvent: cdcl3  
Data collected on: Jan 14 2015

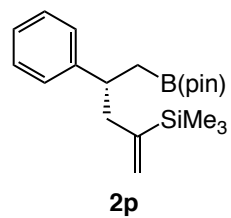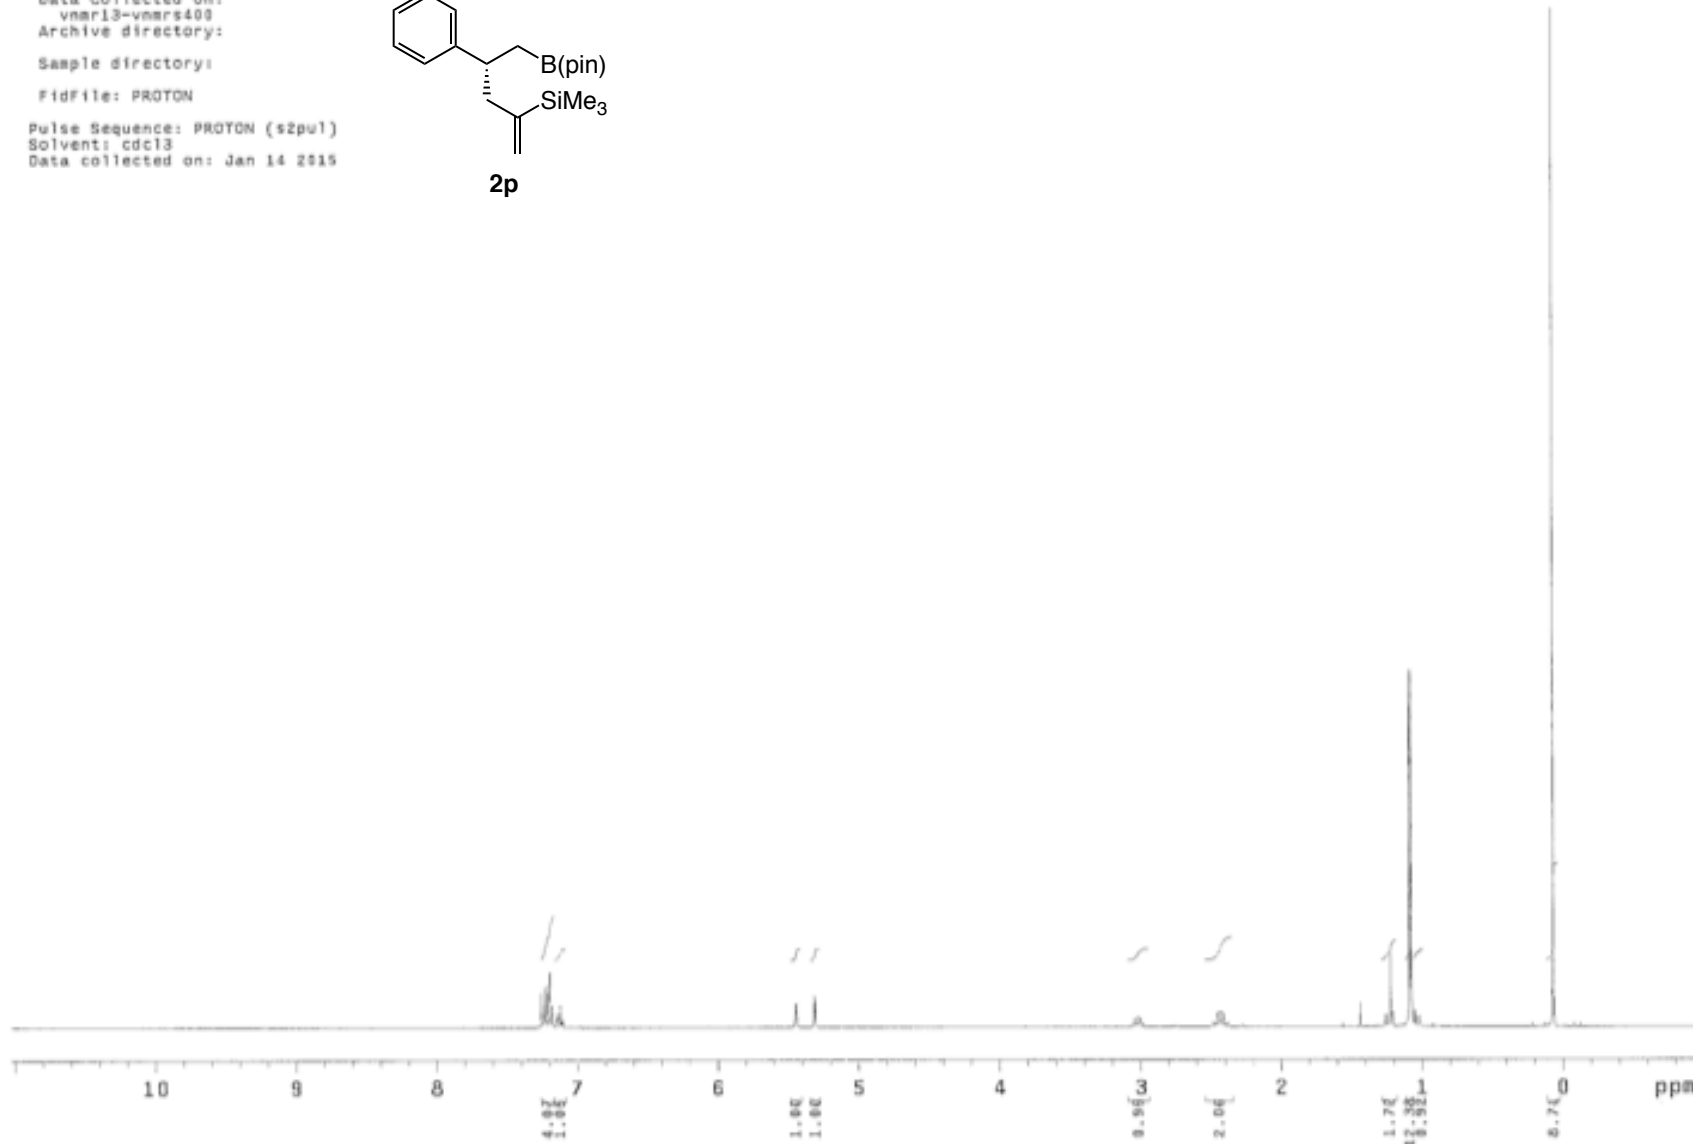



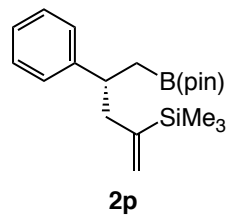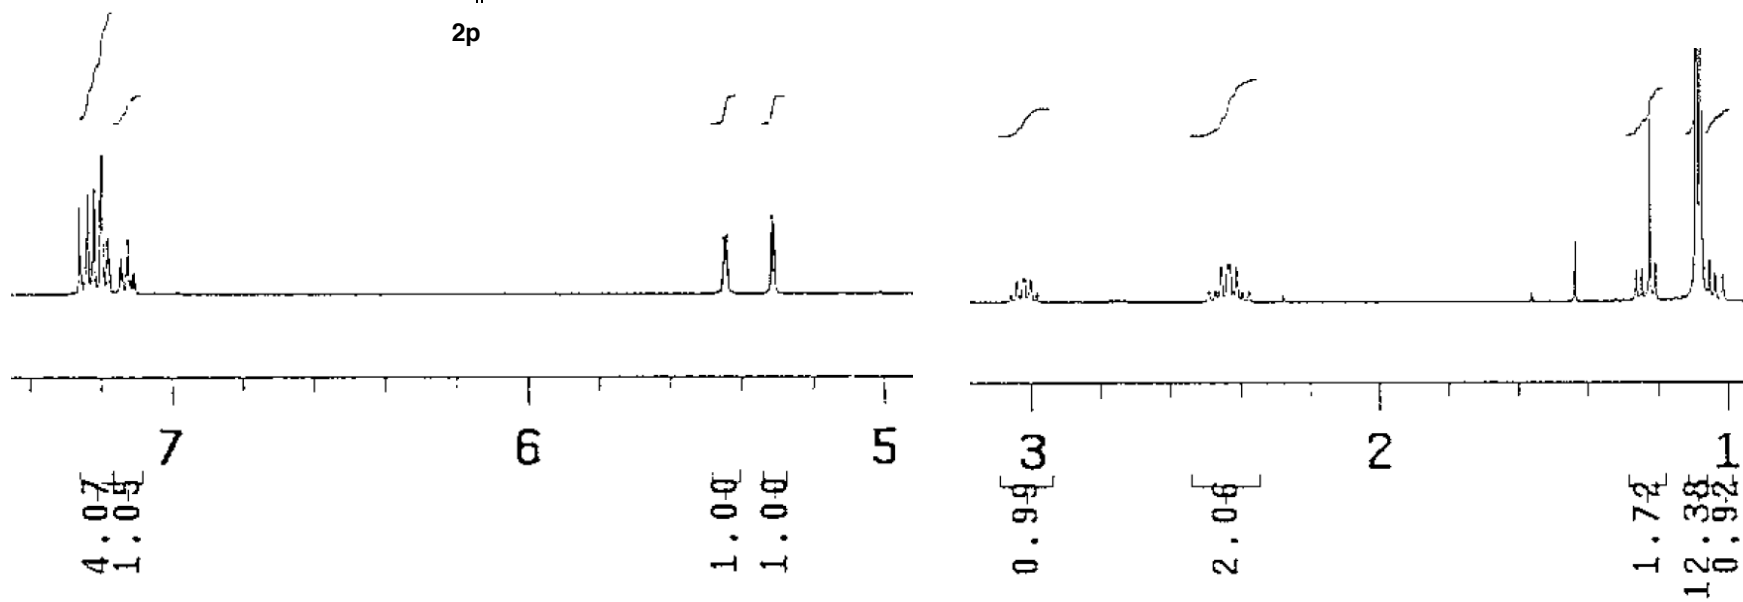

Sample Name:  
SR-IV-302-carbon  
Data Collected on:  
vnmr13-vnmrs400  
Archive directory:  
Sample directory:  
FidFile: CARBON  
Pulse Sequence: CARBON (s2pu1)  
Solvent: cdcl3  
Data collected on: Jan 14 2015

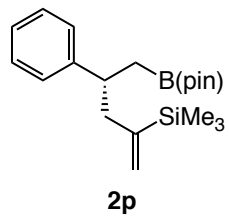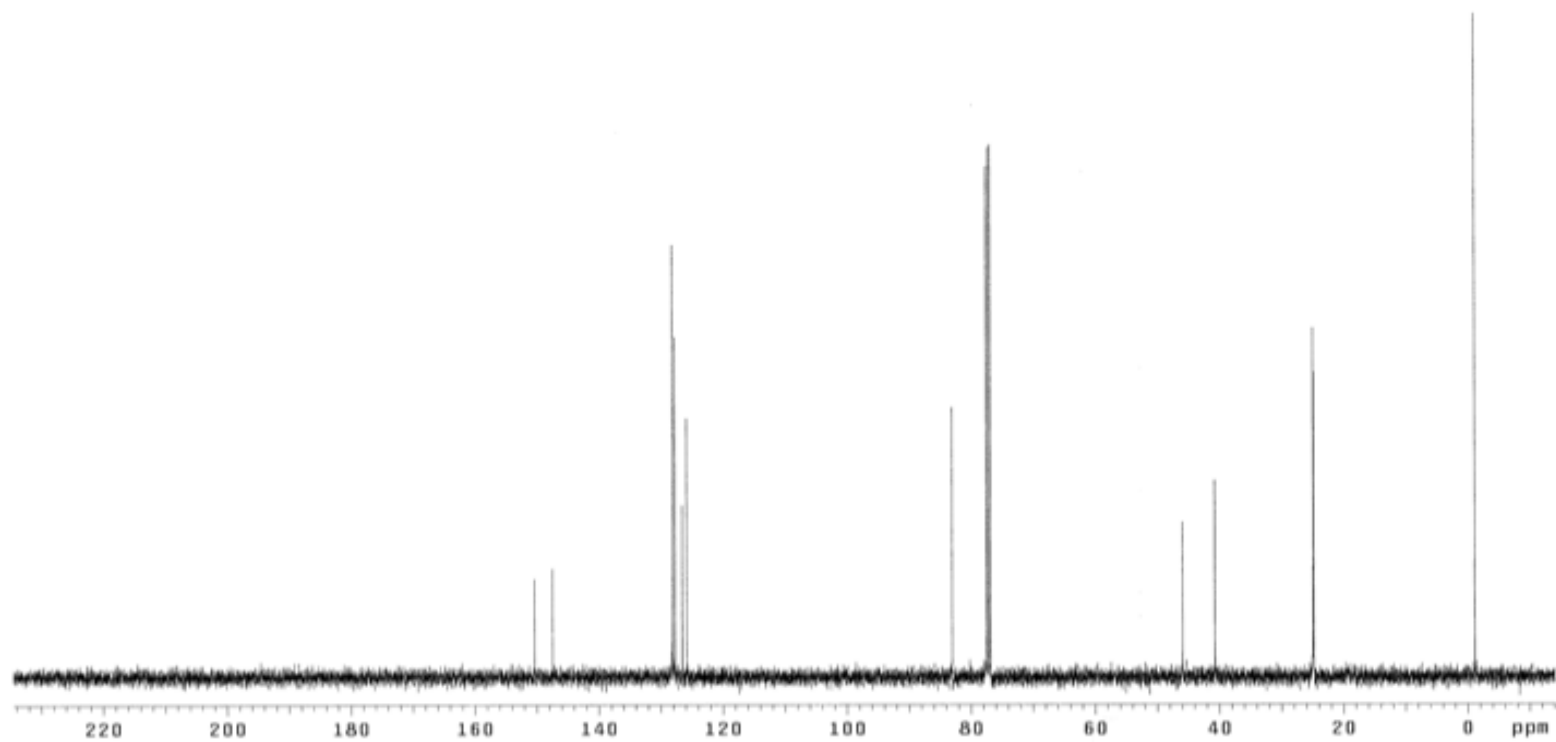

Sample Name:  
SR-V-46  
Data Collected on:  
nmr18-vnmrs500  
Archive directory:  
Sample directory:  
FidFile: PROTON  
Pulse Sequence: PROTON (s2pu1)  
Solvent: cdcl3  
Data collected on: Jan 18 2015

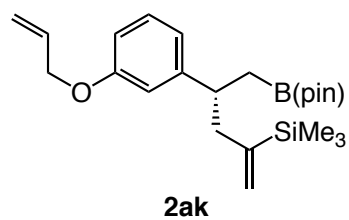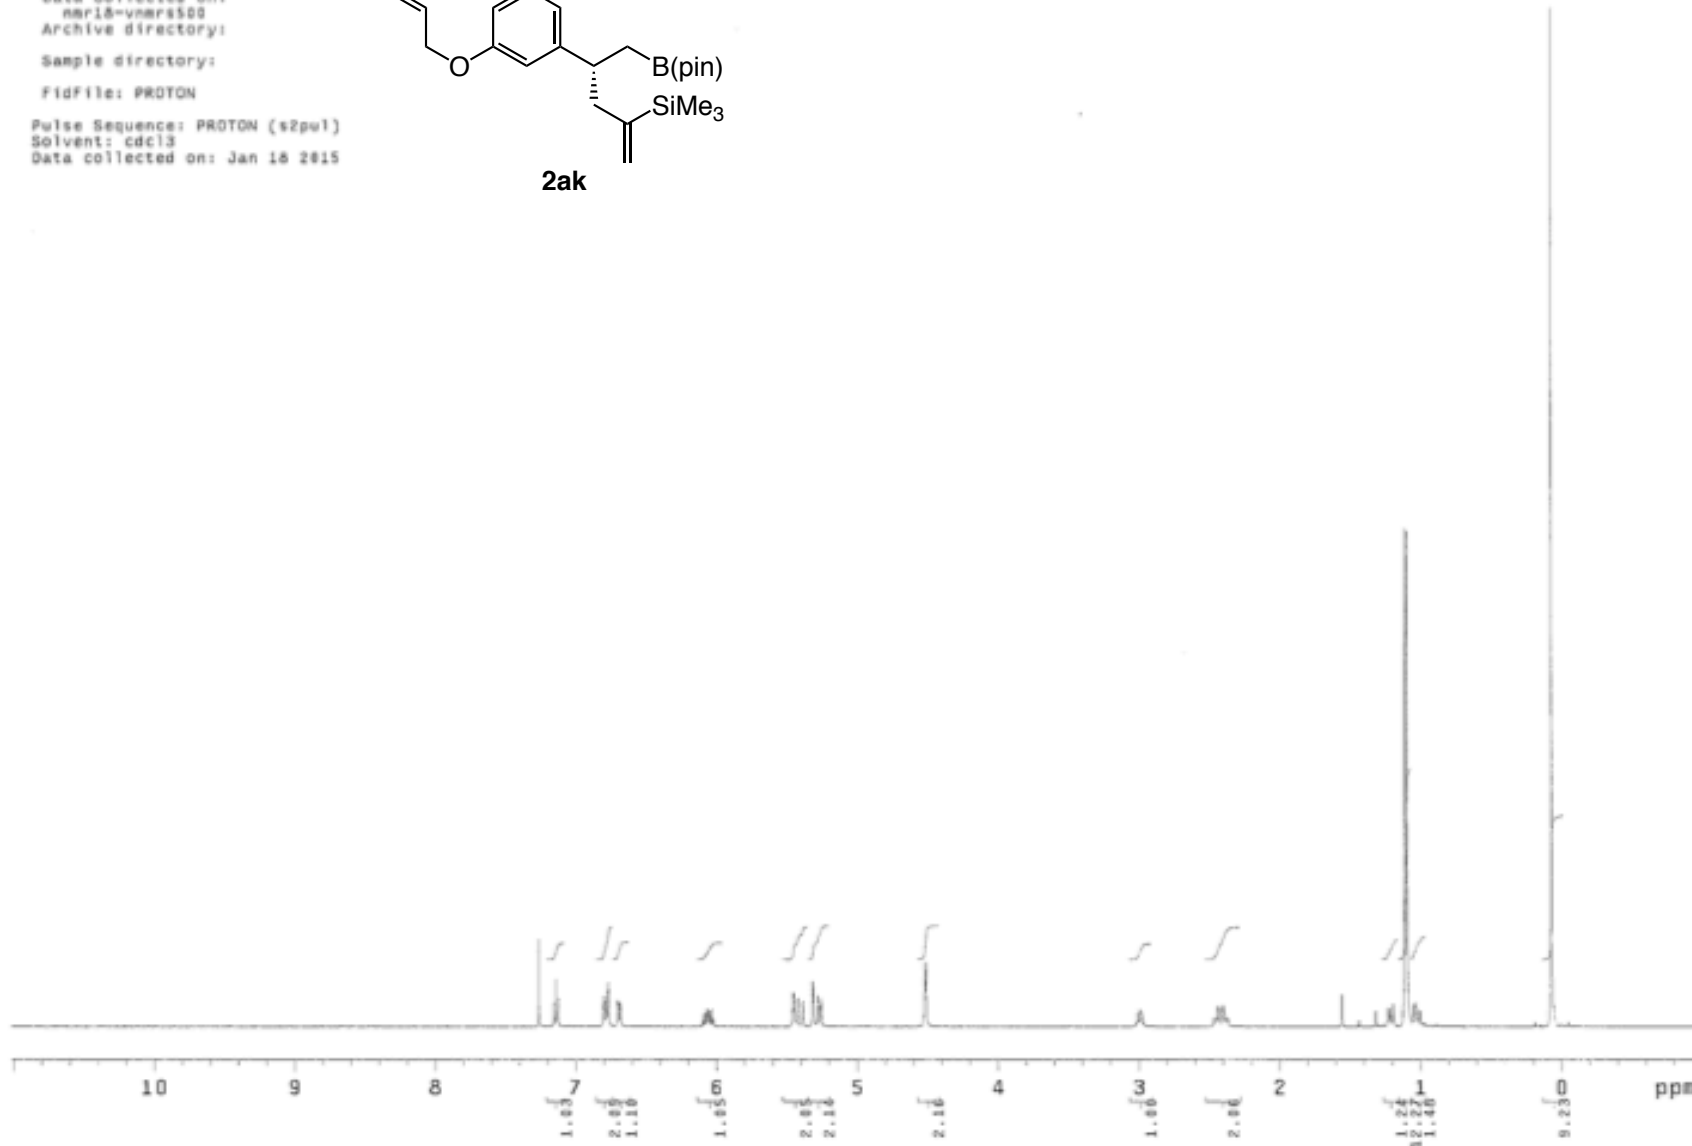

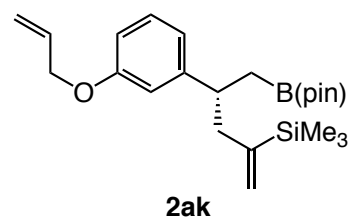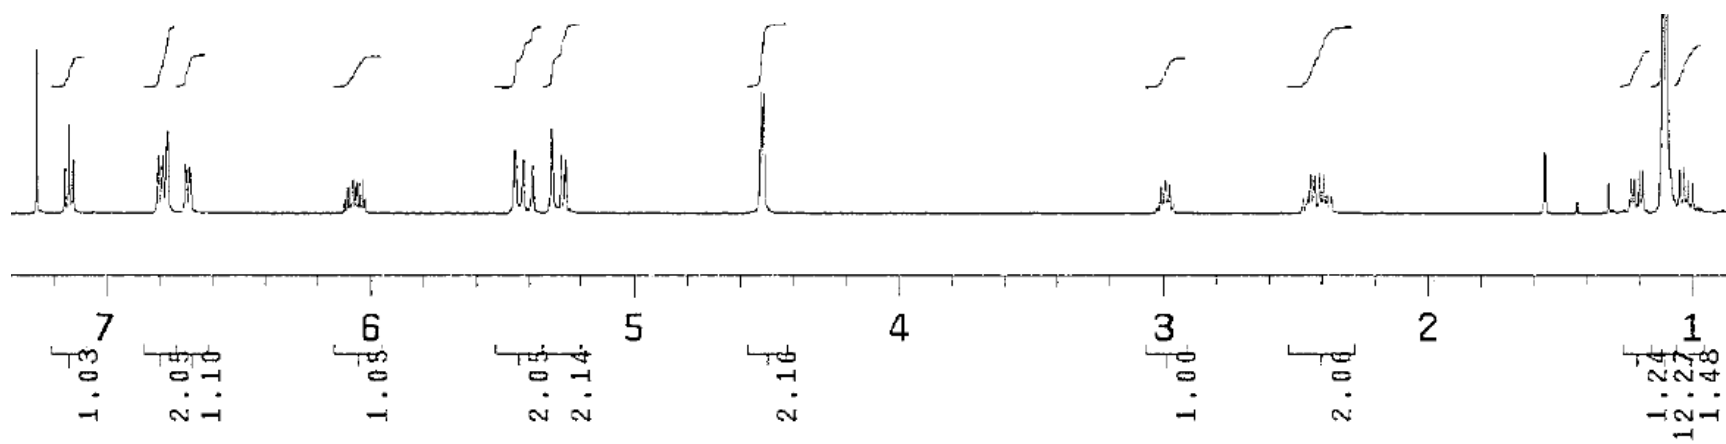

Sample Name:  
SR-V-46-carbon  
Data Collected on:  
mar18-vnar509  
Archive directory:  
Sample directory:  
FidFile: CARBON  
Pulse Sequence: CARBON (s2pu1)  
Solvent: cdcl3  
Data collected on: Jan 18 2015

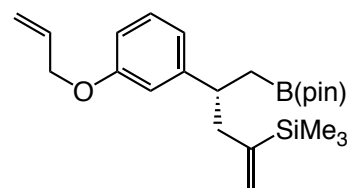

**2ak**

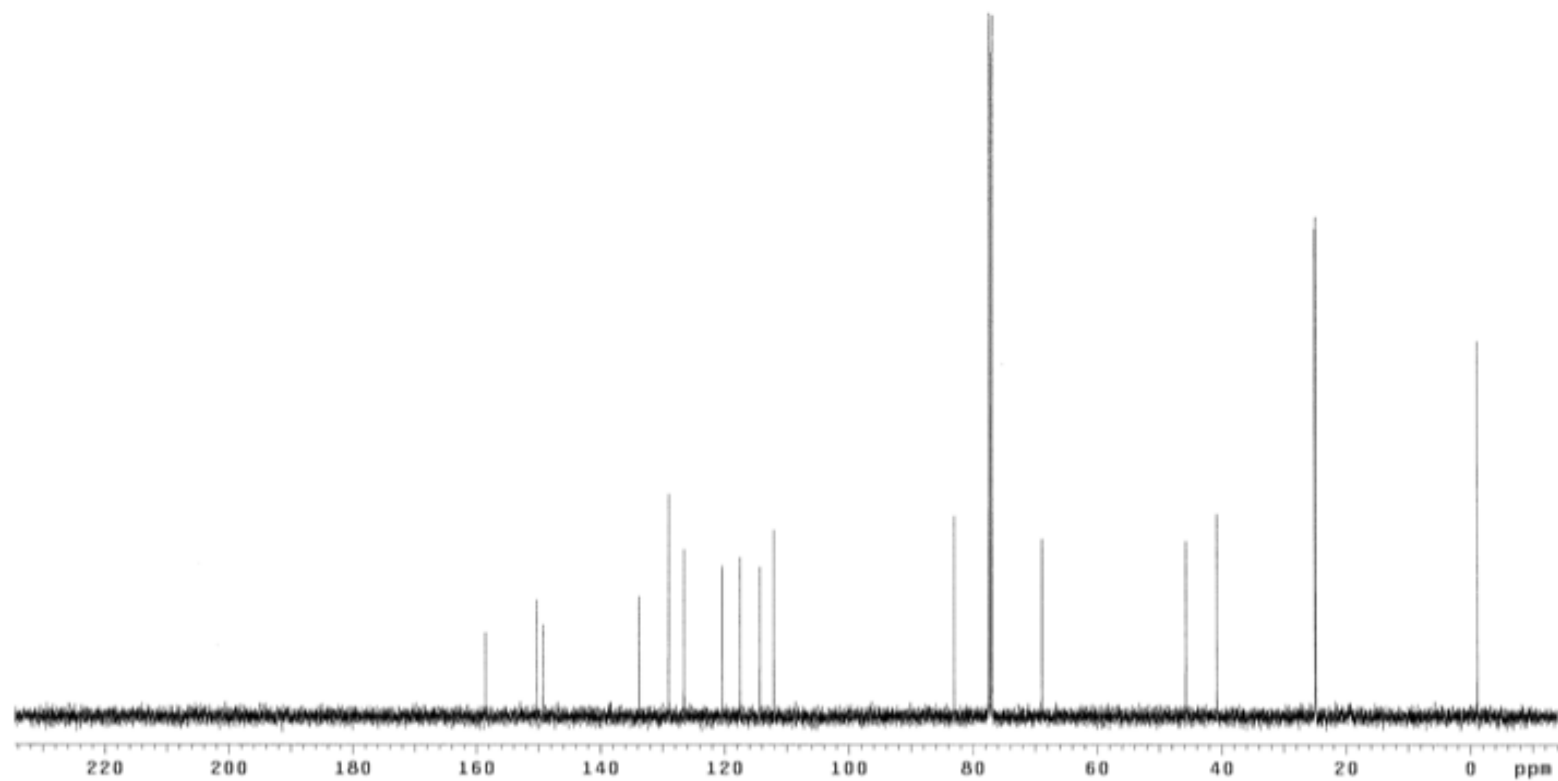

Sample Name:  
 SR-IV-255-A  
 Data Collected on:  
 vnmr13-vnmrs400  
 Archive directory:  
 Sample directory:  
 Fidfile: PROTON  
 Pulse Sequence: PROTON (s2pu1)  
 Solvent: cdcl3  
 Data collected on: Oct 1 2014

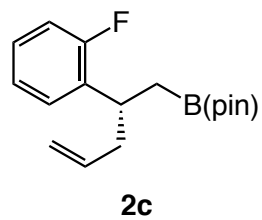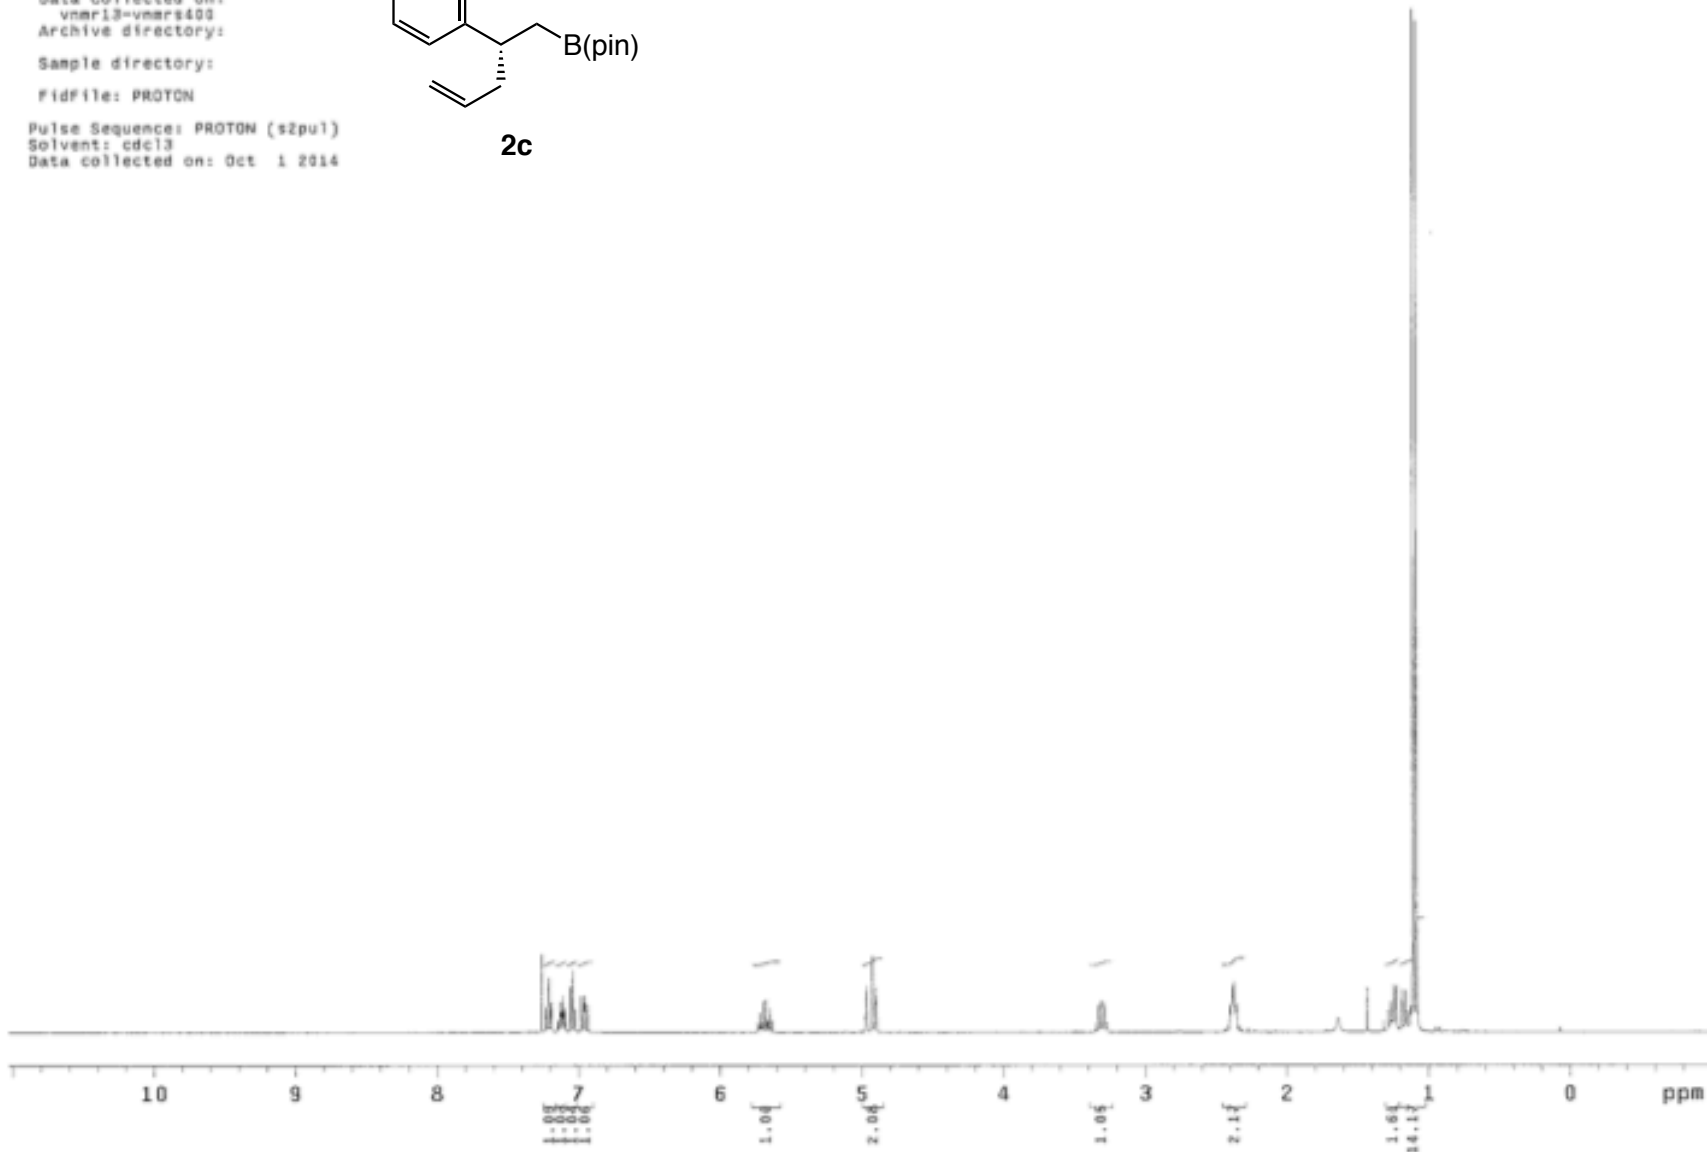

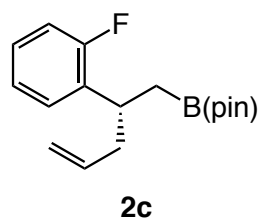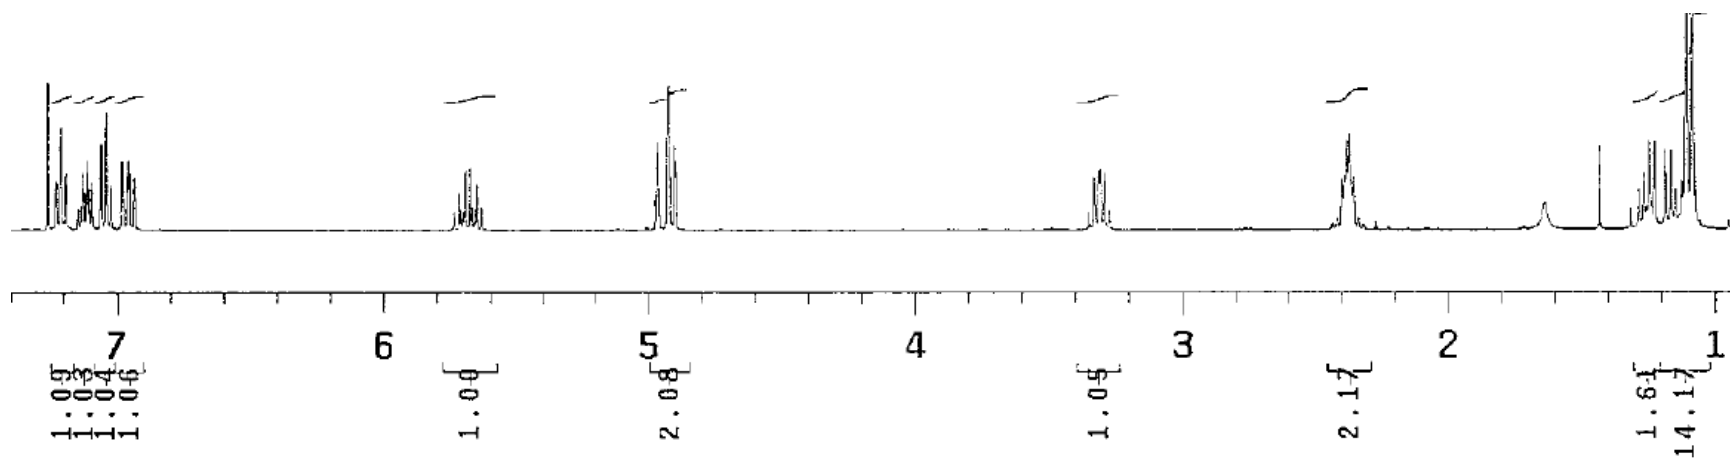

Sample Name:  
SR-IV-265-A-carbon  
Data Collected on:  
vnmr13-vnmr498  
Archive directory:  
Sample directory:  
FidFile: CARBON  
Pulse Sequence: CARBON (s2pu1)  
Solvent: cdcl3  
Data collected on: Oct 1 2014

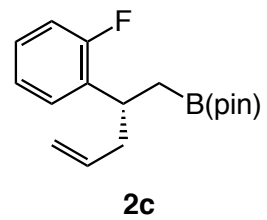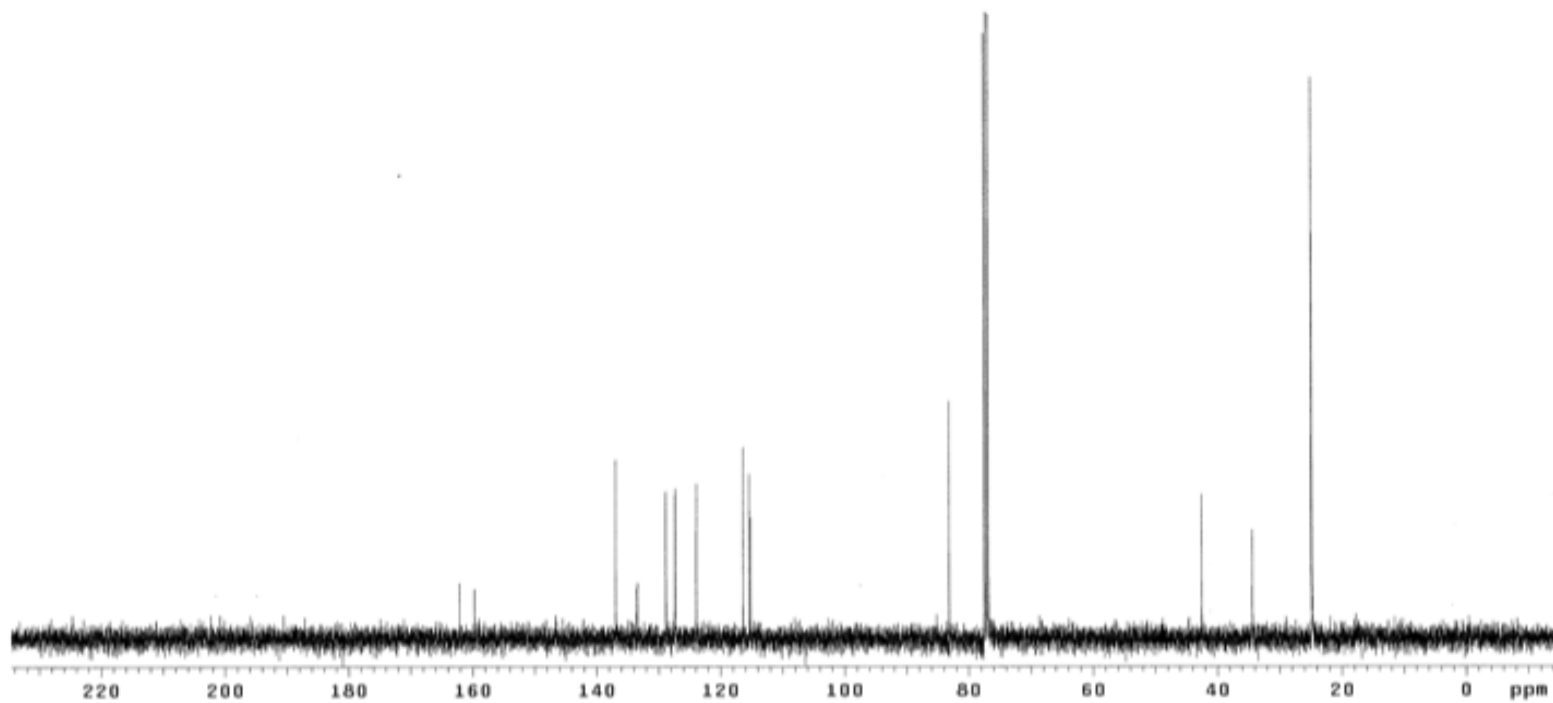



Sample Name:  
SR-IV-252-A  
Data Collected on:  
vnmr13-vnmrs400  
Archive directory:  
Sample directory:  
Fidfile: PROTON  
Pulse Sequence: PROTON (s2pu1)  
Solvent: cdc13  
Data collected on: Aug 29 2014

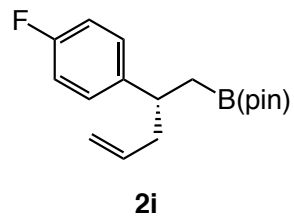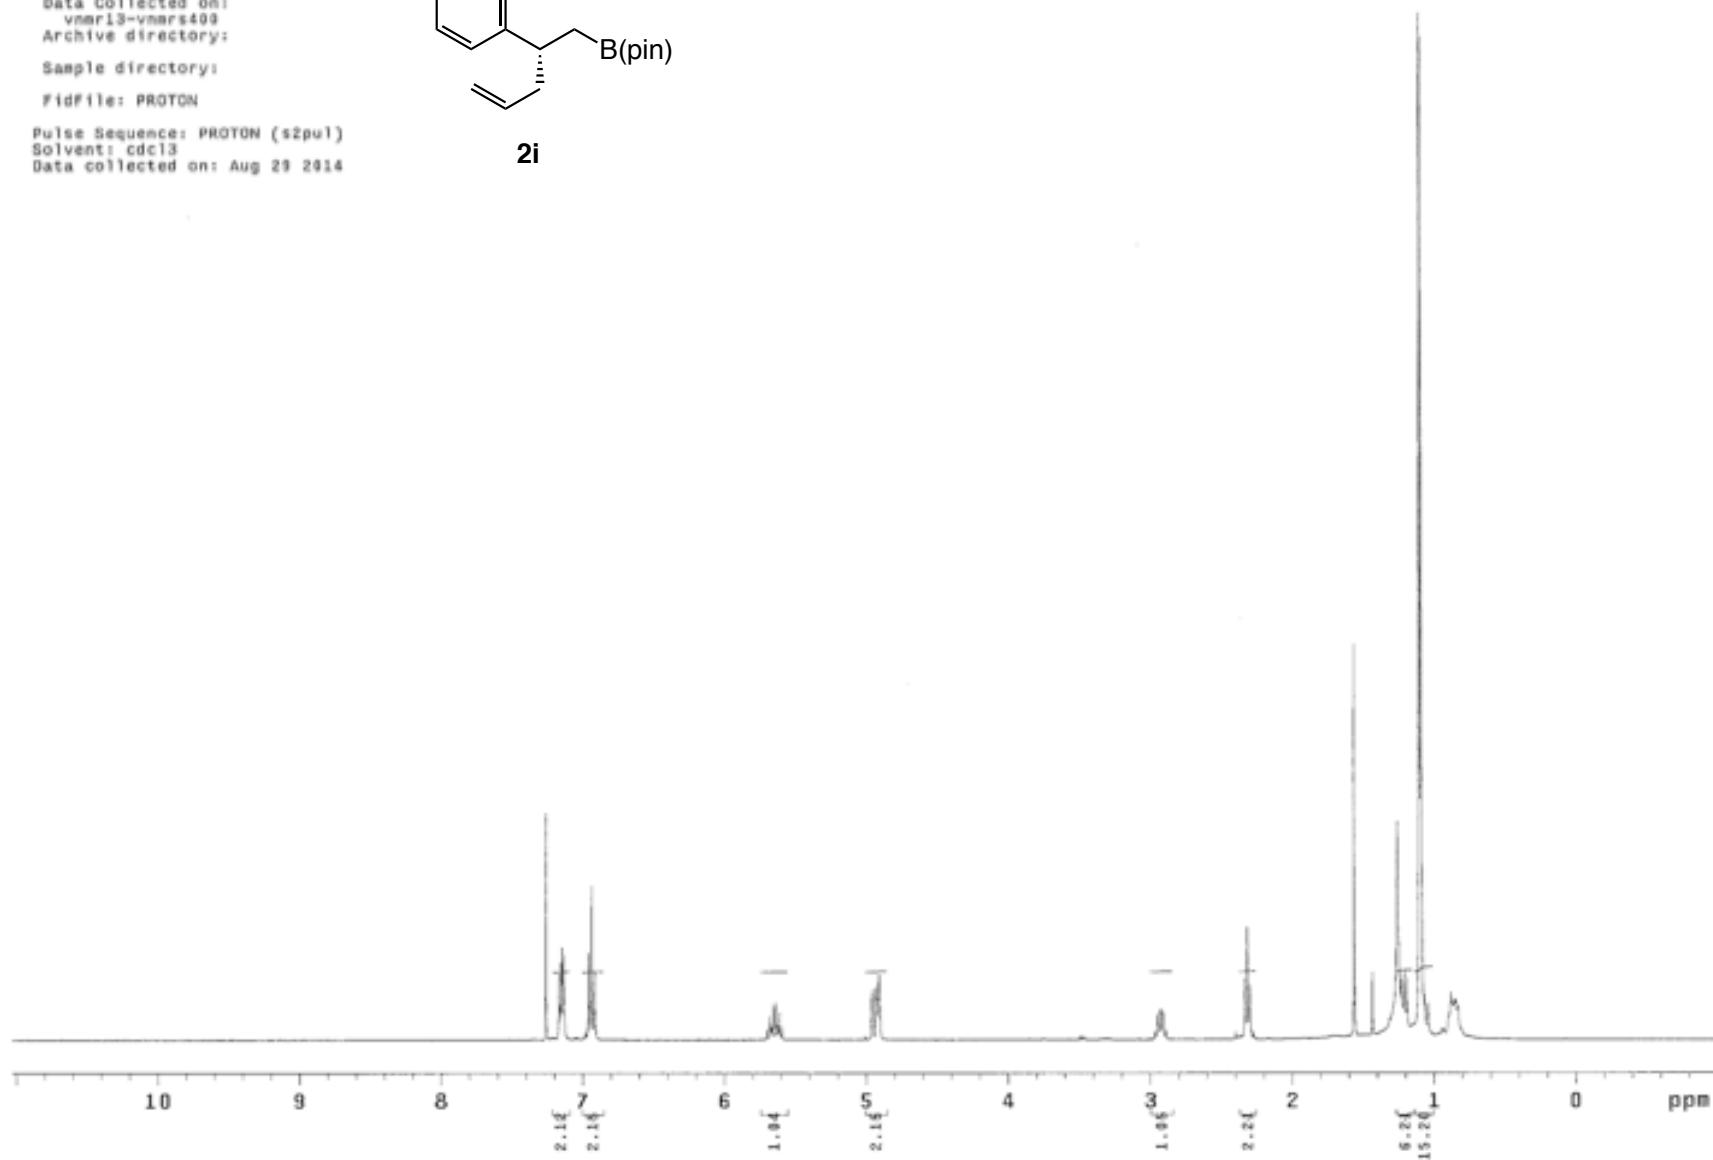

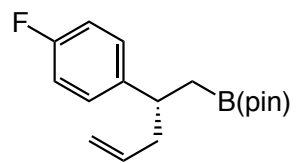

2i

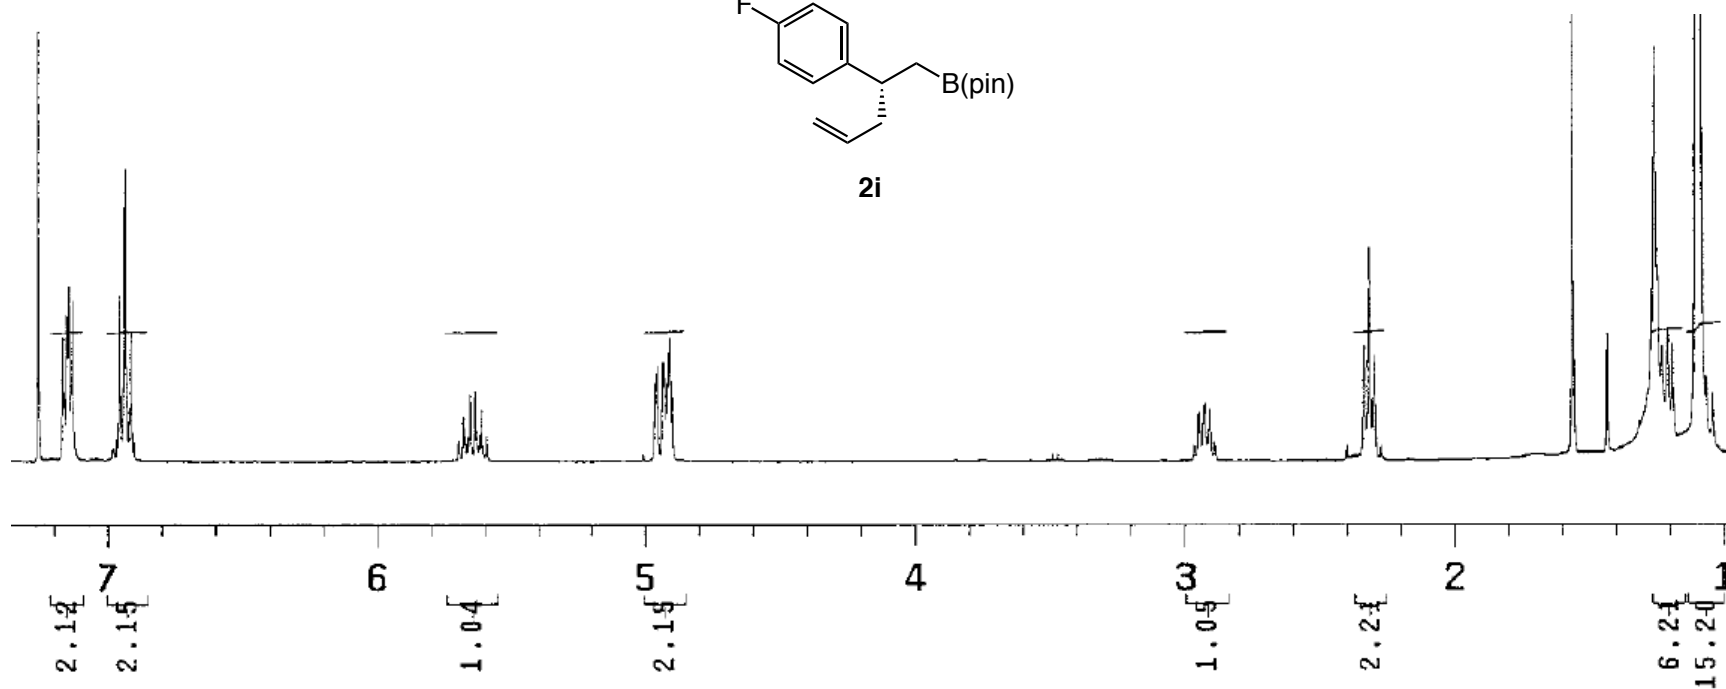

Sample Name: SR-IV-252-A-carbon  
Data Collected on: vnmr13-vnmrs498  
Archive directory:  
Sample directory:  
FidFile: SR-IV-252-A-carbon  
Pulse Sequence: CARBON (s2pul)  
Solvent: cdcl3  
Data collected on: Aug 29 2014

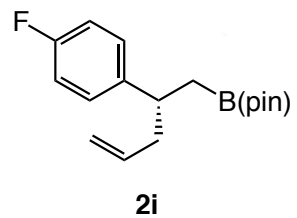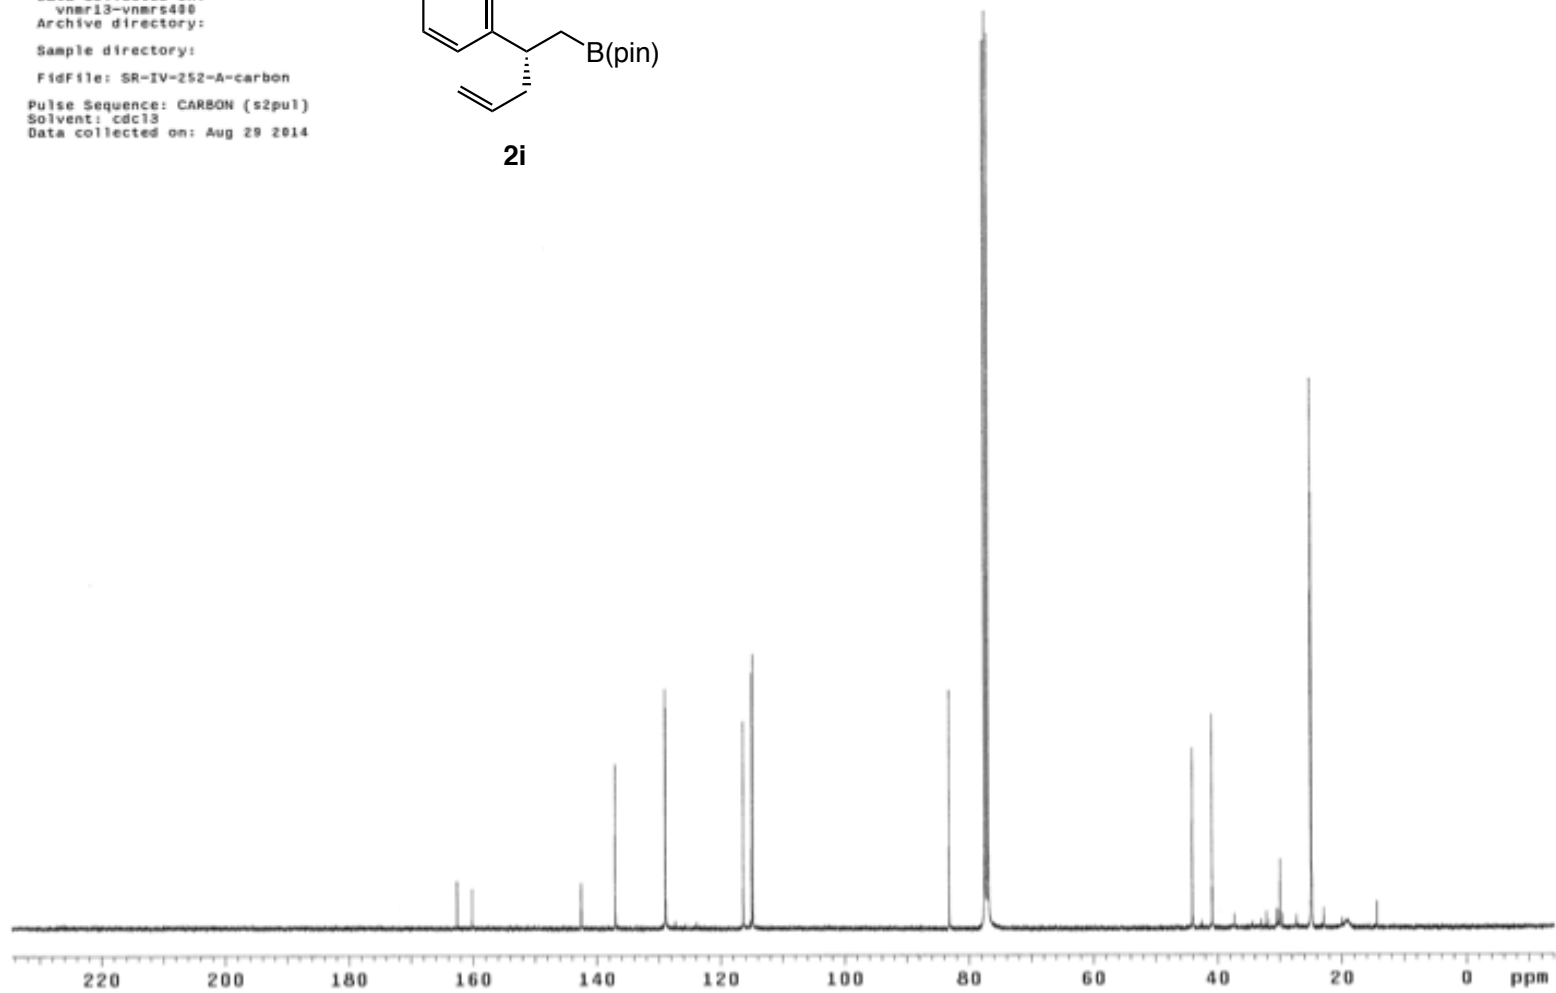

Sample Name:  
SR-V-34  
Data Collected on:  
vnmr13-vnmrs400  
Archive directory:  
Sample directory:  
FidFile: PROTON

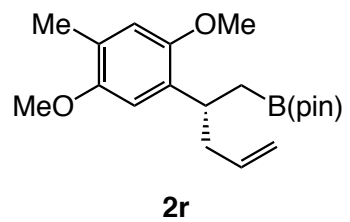

Pulse Sequence: PROTON (s2pu1)  
Solvent: cdcl3  
Data collected on: Dec 28 2014

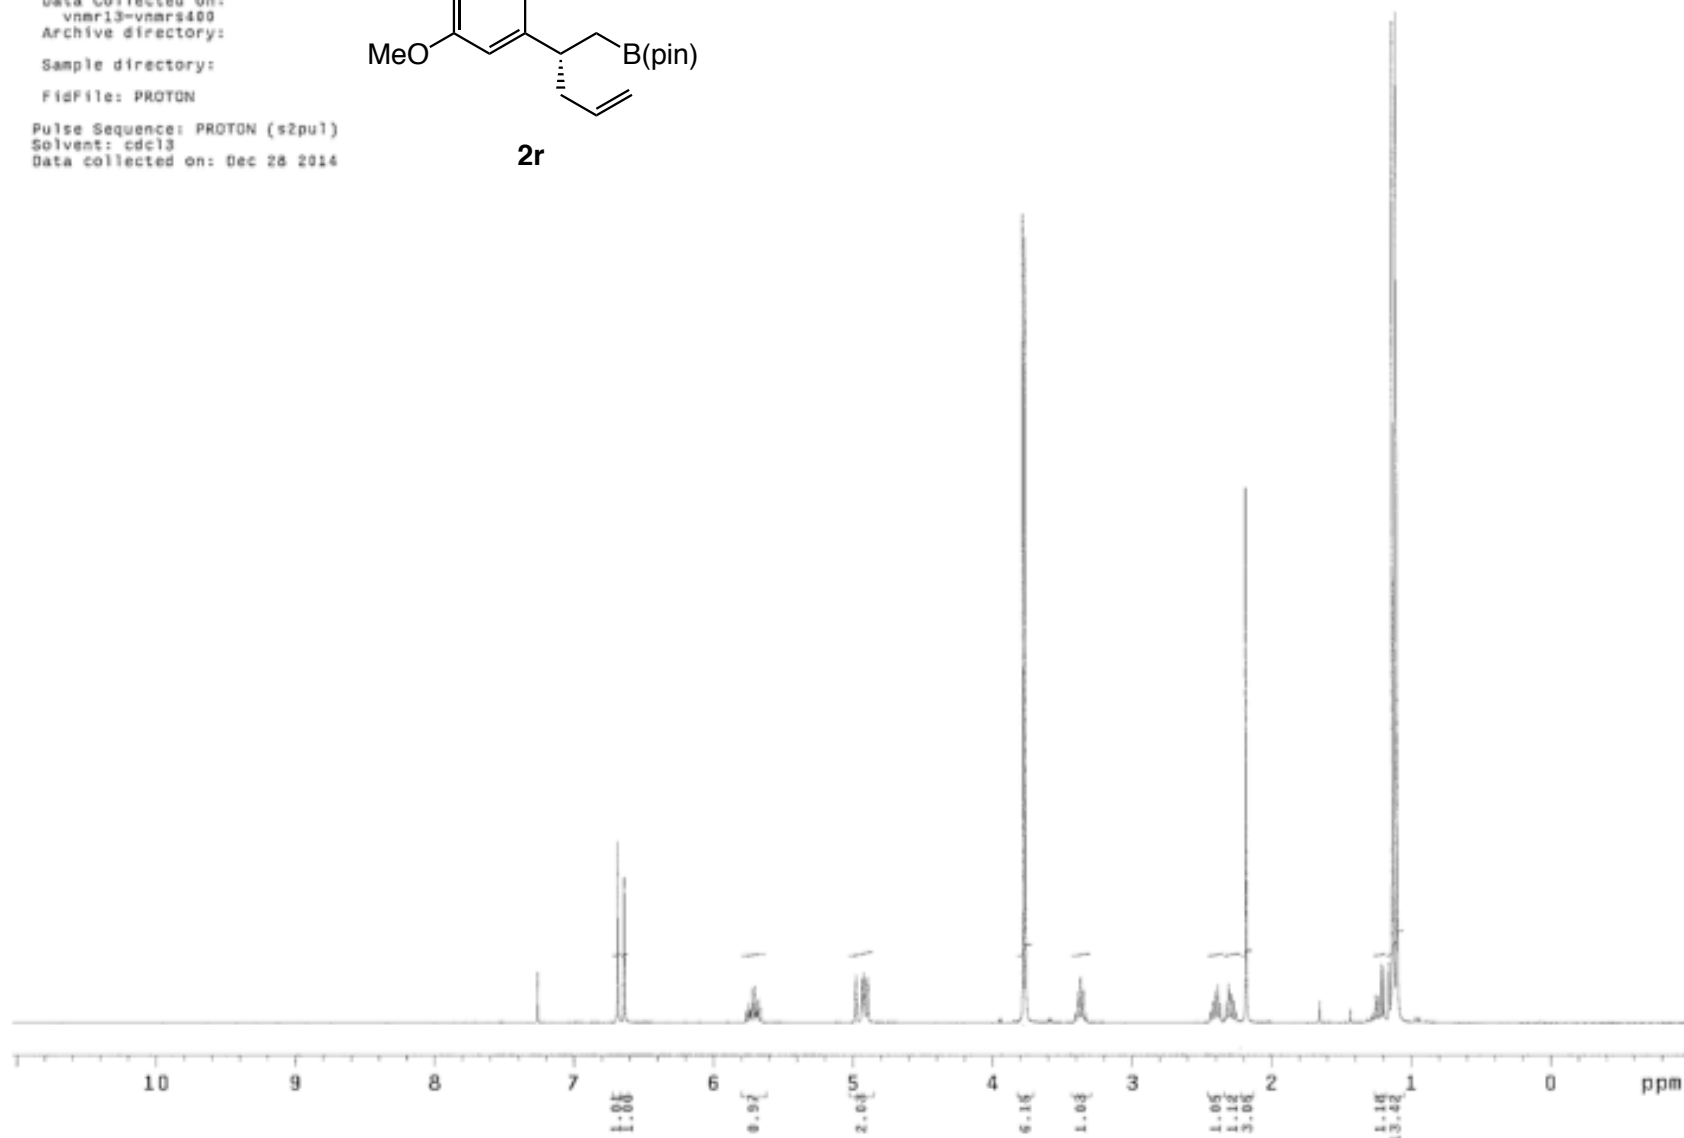

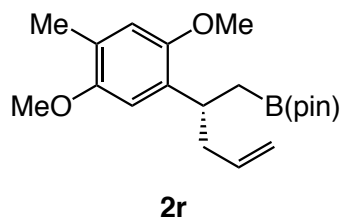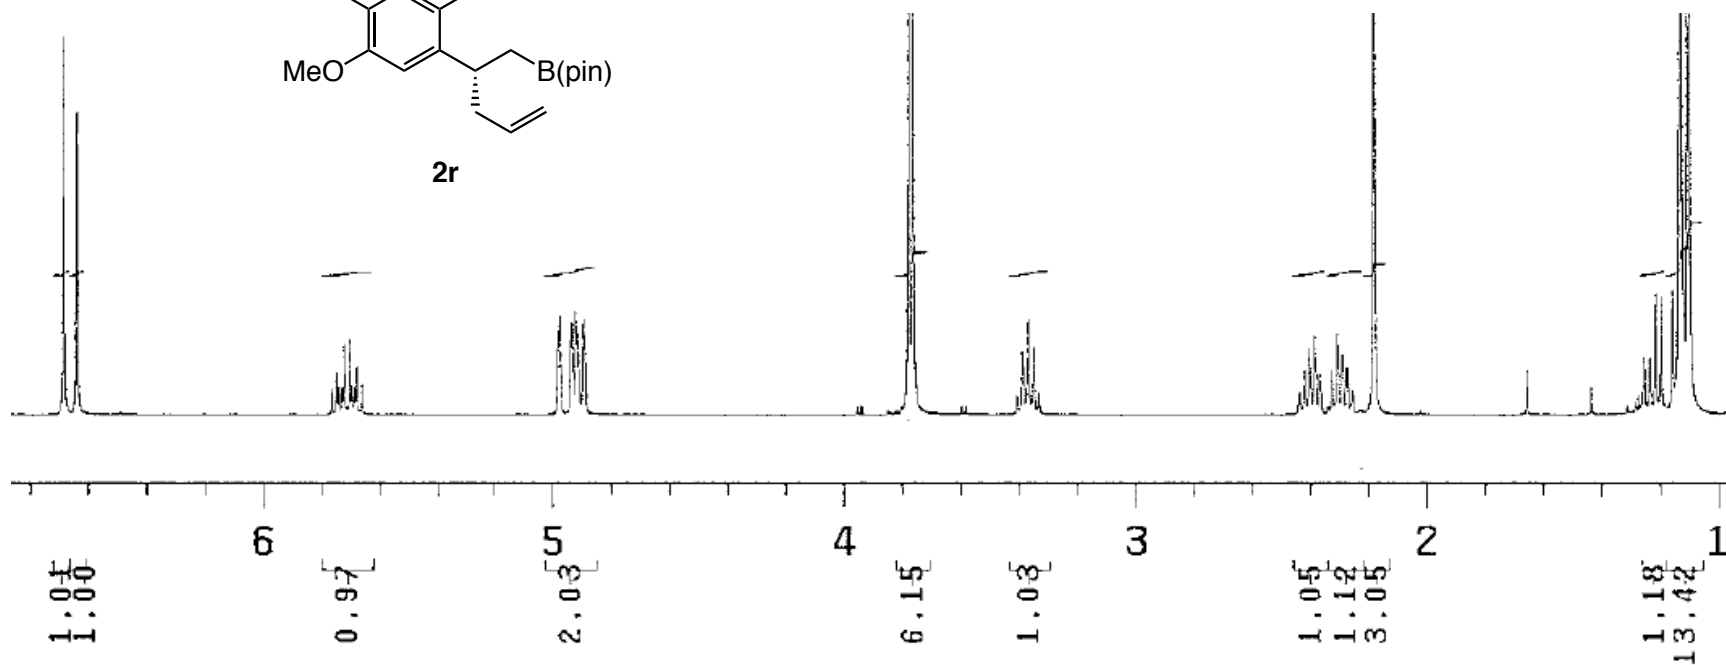

Sample Name:  
 SR-V-34-carbon  
 Data Collected on:  
 vmar13-vmar1409  
 Archive directory:  
 Sample directory:  
 FidFile: CARBON  
 Pulse Sequence: CARBON (s2pu1)  
 Solvent: cdCl3  
 Data collected on: Dec 28 2014

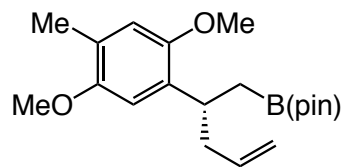

**2r**

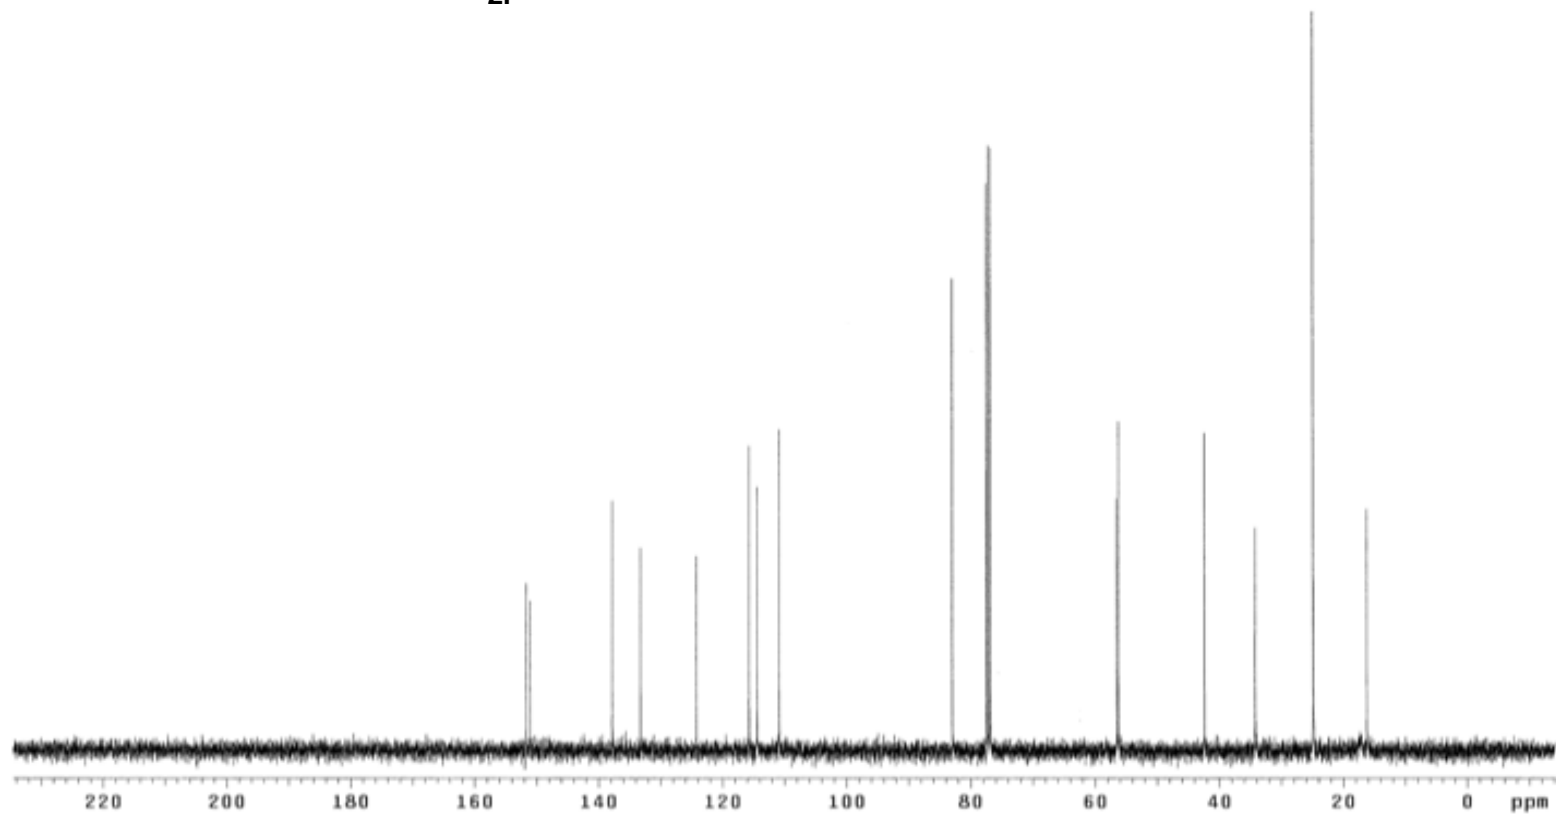

Sample Name:  
 SR-V-36  
 Data Collected on:  
 nmr14-vnmrs480  
 Archive directory:  
 Sample directory:  
 FidFile: SR-V-36  
 Pulse Sequence: PROTON (s2pu1)  
 Solvent: cdcl3  
 Data collected on: Feb 18 2015

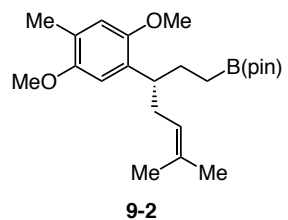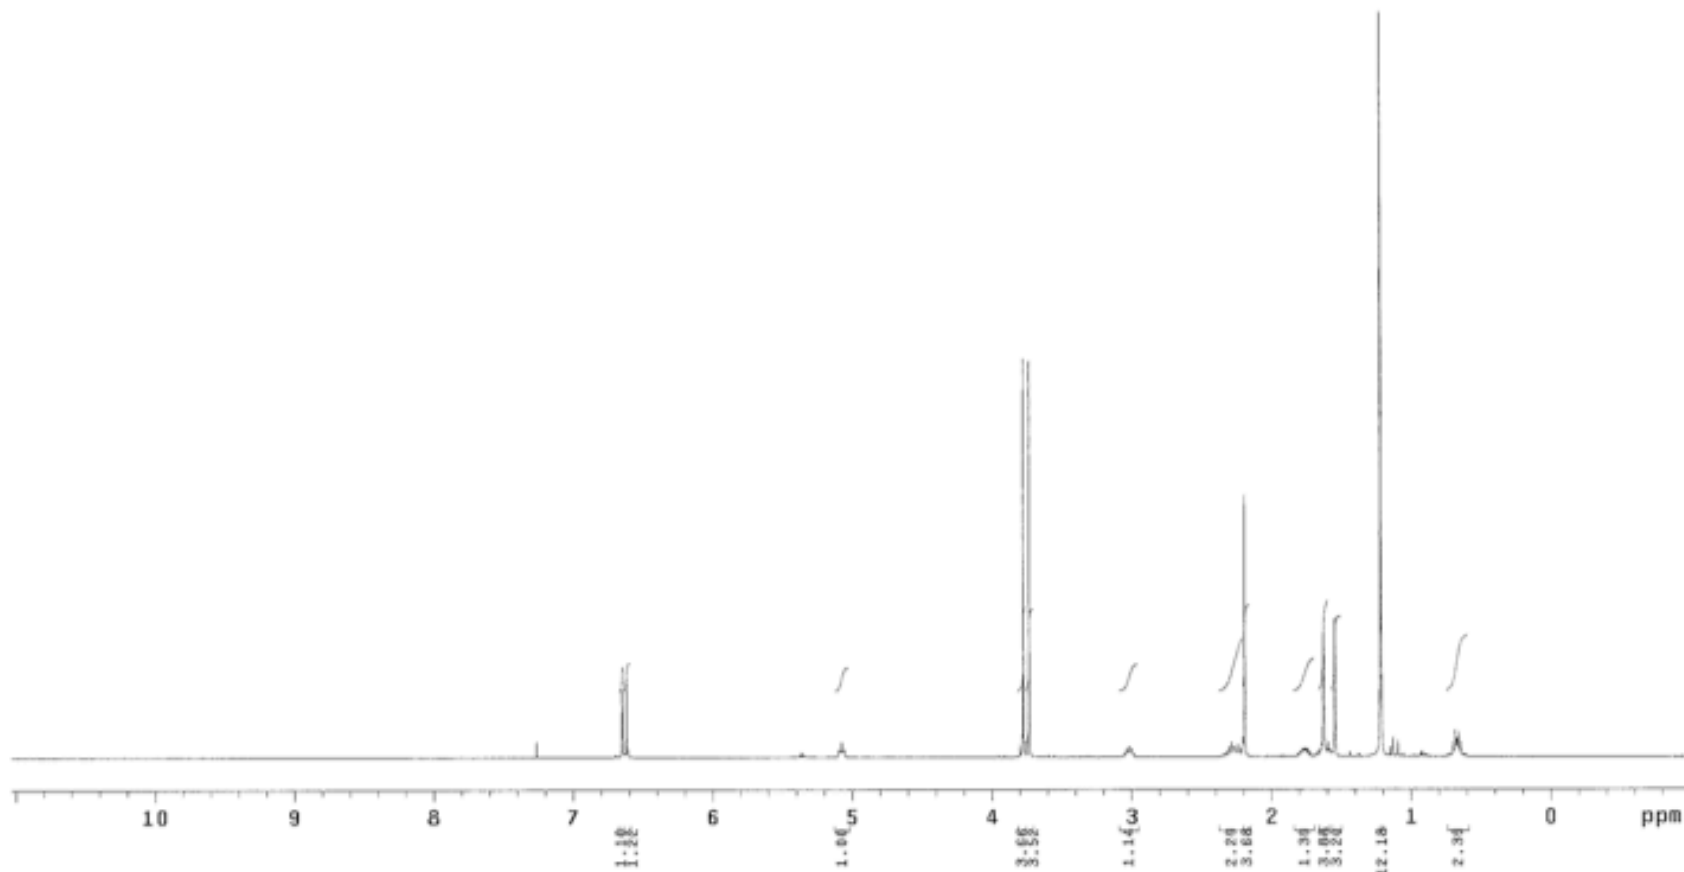

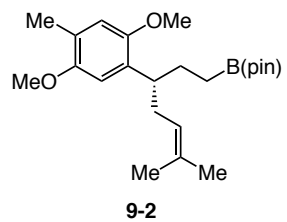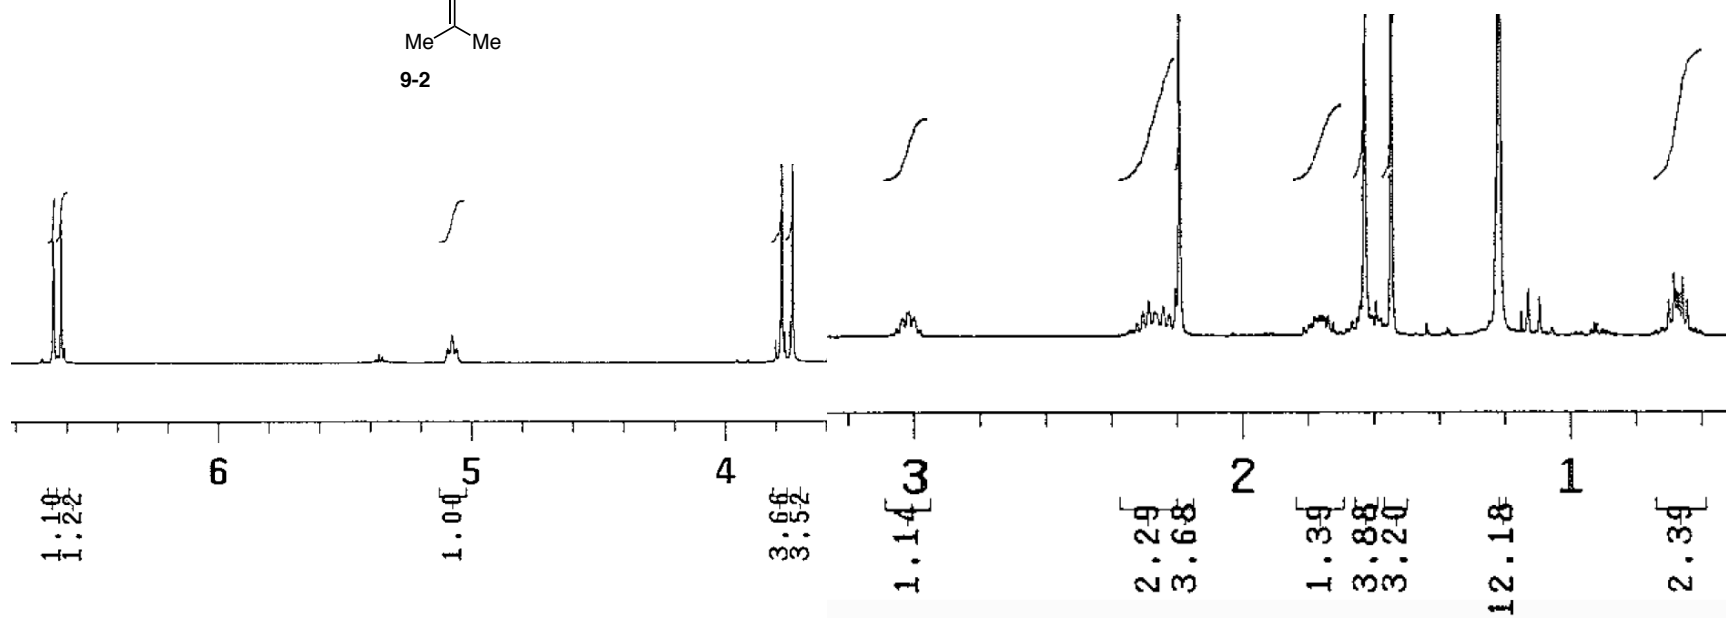



Sample Name: SR-V-36-carbon  
Data Collected on: mri14-vnars409  
Archive directory:  
Sample directory:  
FidFile: CARBON  
Pulse Sequence: CARBON (s2pu1)  
Solvent: cdcl3  
Data collected on: Feb 18 2015

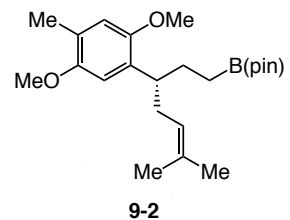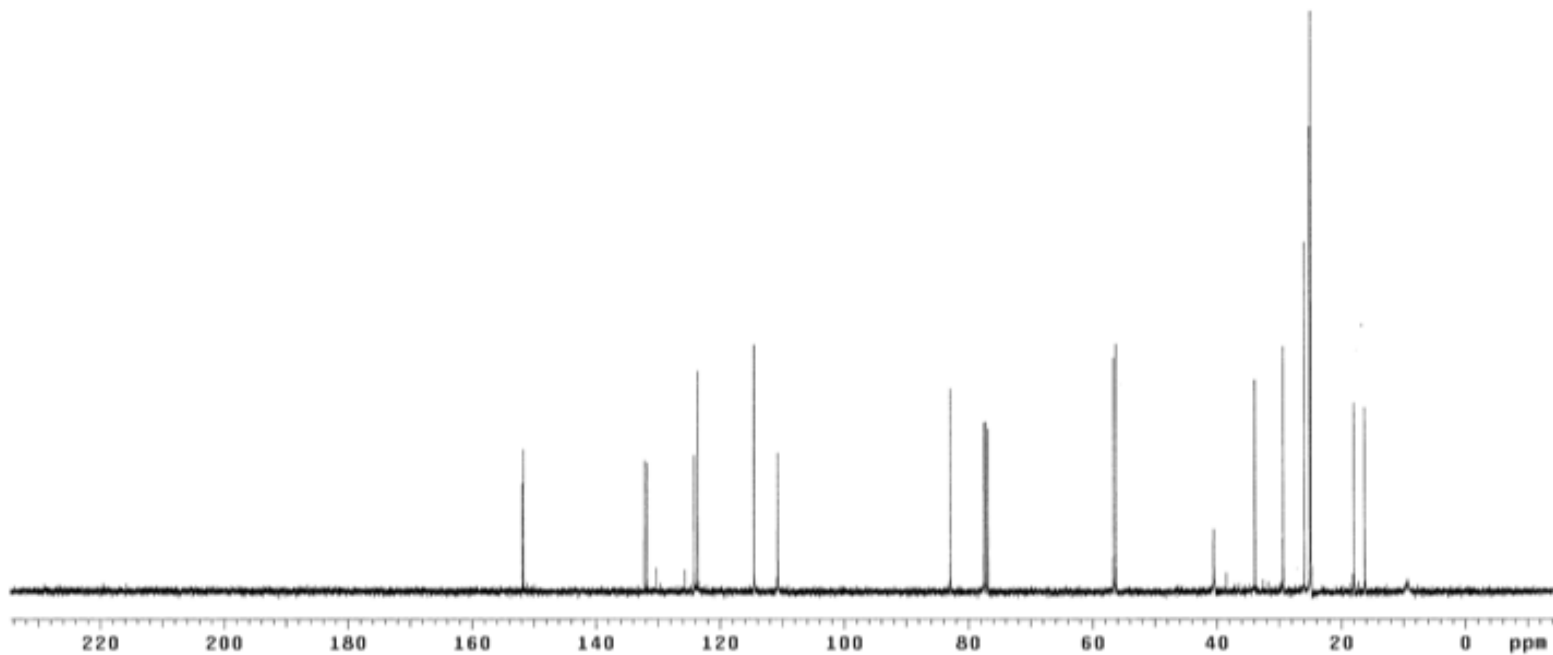

Sample Name:  
 SR-V-69-5  
 Data Collected on:  
 vnr13-vnrs488  
 Archive directory:  
 Sample directory:  
 Fidfile: PROTON  
 Pulse Sequence: PROTON (s2pu1)  
 Solvent: cdc13  
 Data collected on: Mar 20 2015

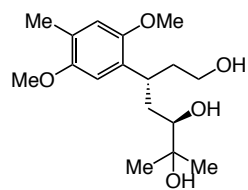

10

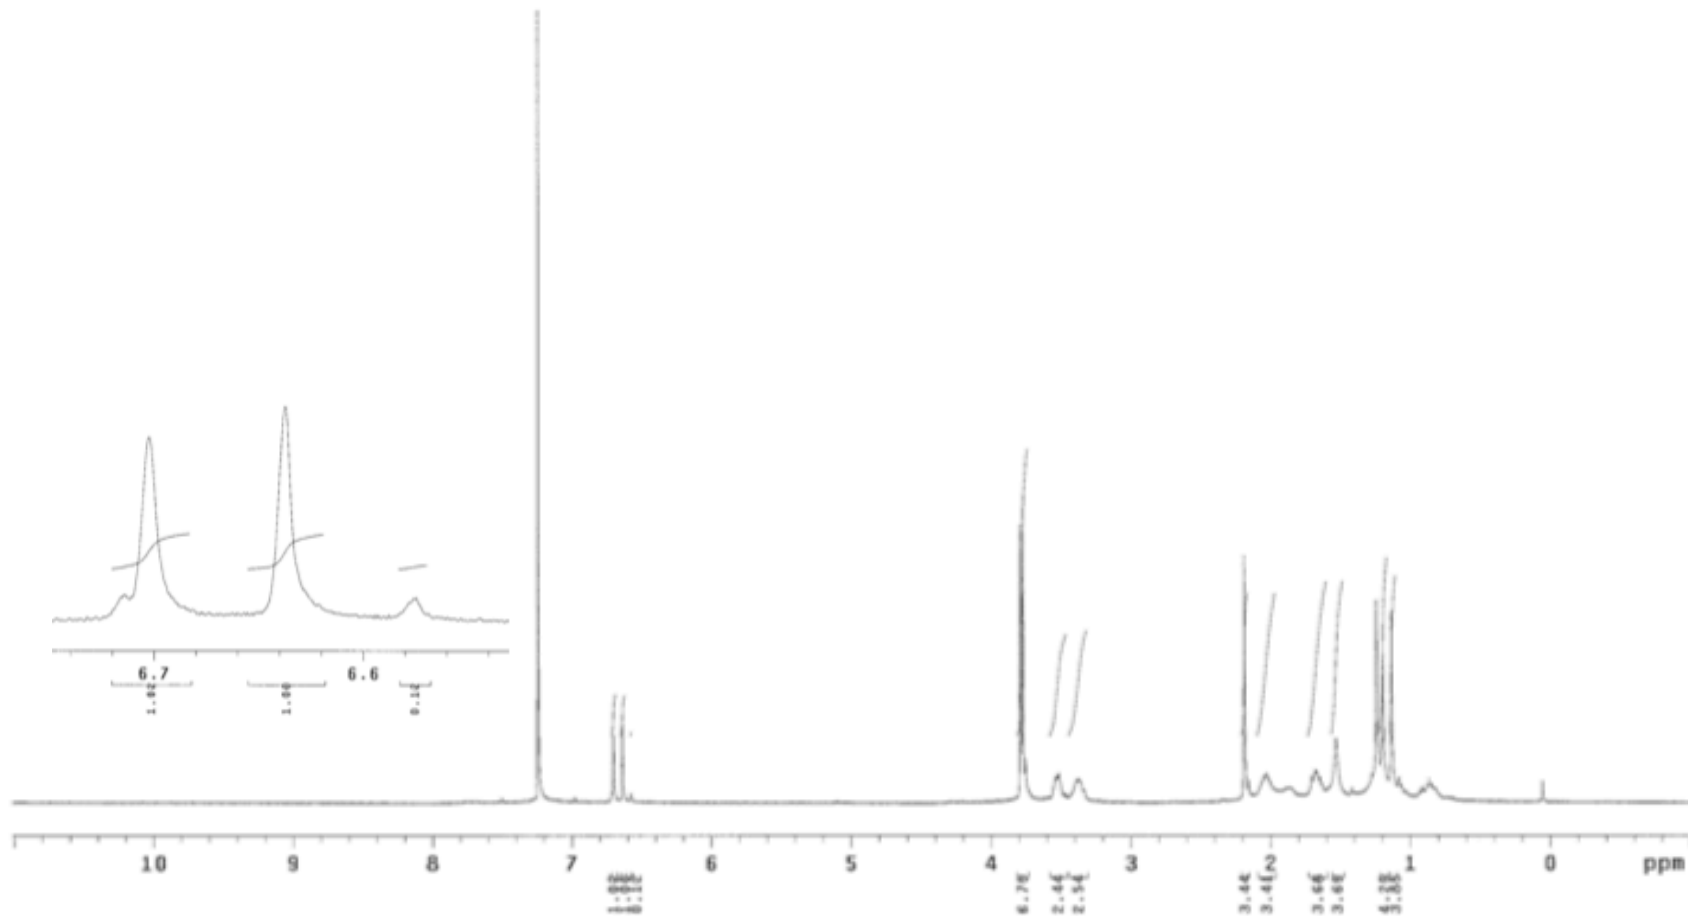

JL-IV-44PD

Sample Name:  
JL-IV-44PD  
Data Collected on:  
vnmr13-vnmrs400  
Archive directory:

Sample directory:  
FidFile: JL-IV-44PD

Pulse Sequence: PROTON (s2pu1)  
Solvent: cdcl3  
Data collected on: Oct 7 2015

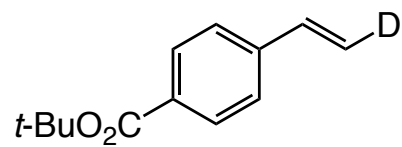

**15**

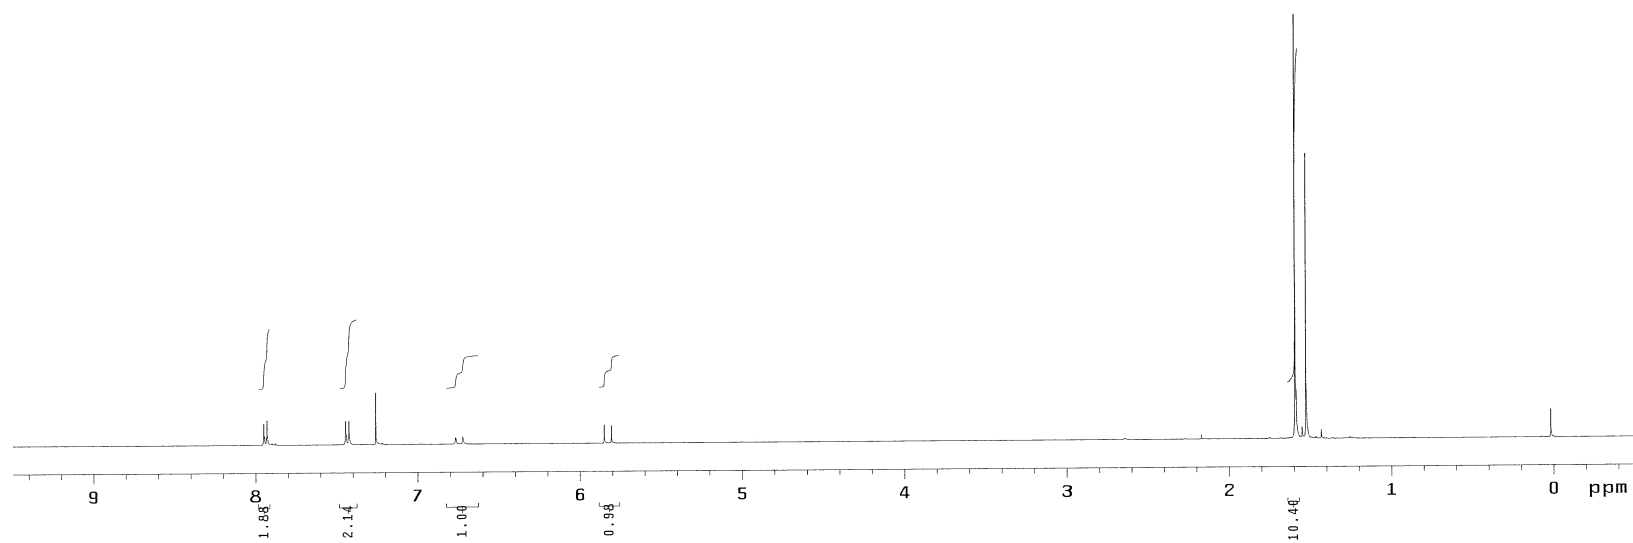

JL-IV-50PD

Sample Name:  
JL-IV-50PD  
Data Collected on:  
vnmr13-vnmrs400  
Archive directory:

Sample directory:

FidFile: JL-IV-50PD-1-C

Pulse Sequence: CARBON (s2pu1)  
Solvent: cdcl3  
Data collected on: Oct 15 2015

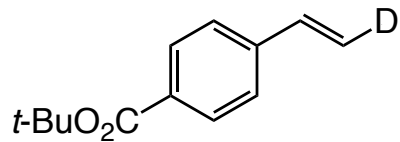

**15**

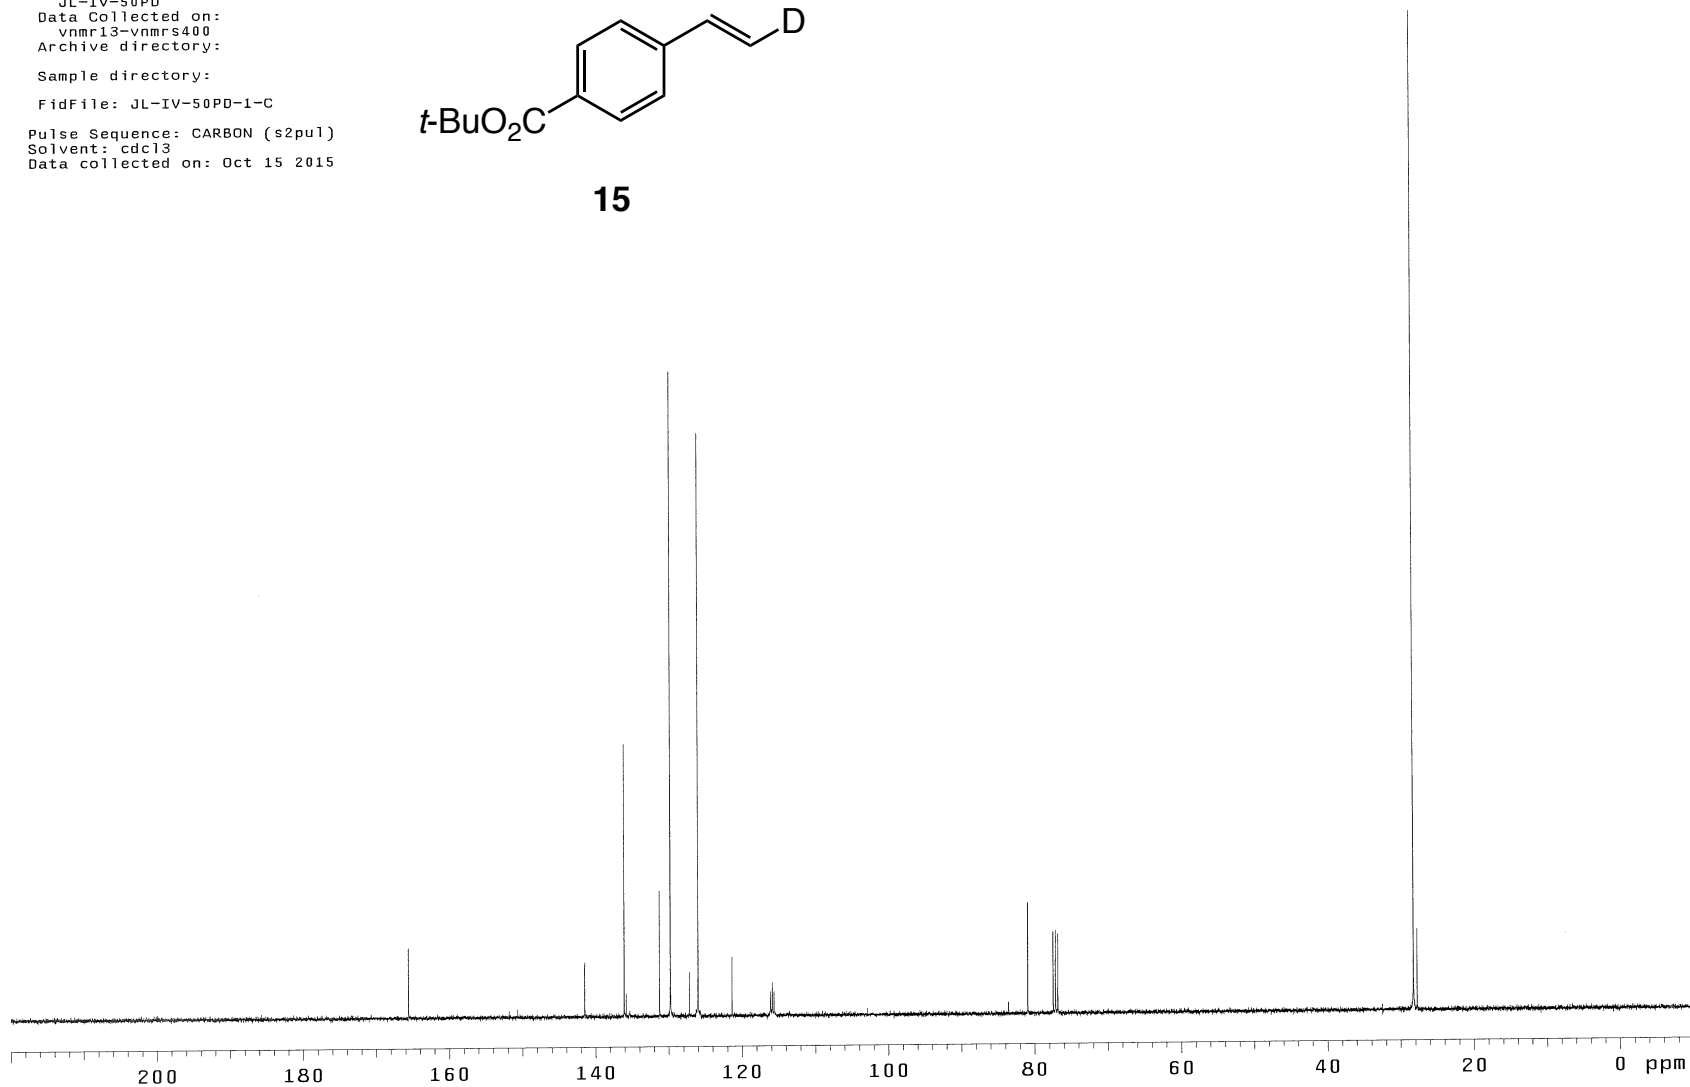

JL-IV-45PD

Sample Name:  
JL-IV-45PD  
Data Collected on:  
vnmr13-vnmrs400  
Archive directory:

Sample directory:

Fidfile: JL-IV-45PD

Pulse Sequence: PROTON (s2pul)  
Solvent: cdcl3  
Data collected on: Oct 7 2015

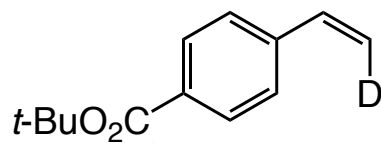

**16**

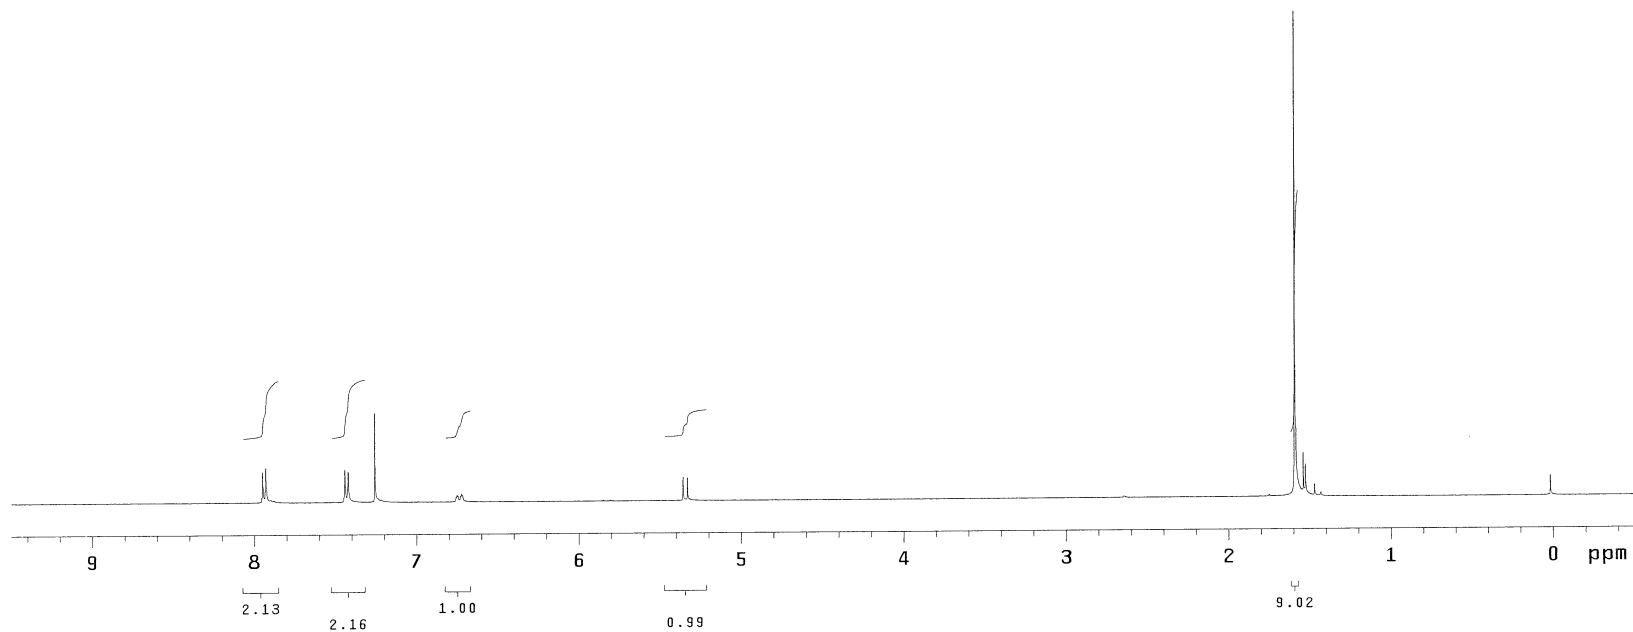

JL-IV-45PD-C

Sample Name:  
JL-IV-45PD-C  
Data Collected on:  
vnmr13-vnmrs400  
Archive directory:

Sample directory:

FidFile: JL-IV-45PD-C

Pulse Sequence: CARBON (s2pu1)  
Solvent: cdcl3  
Data collected on: Oct 13 2015

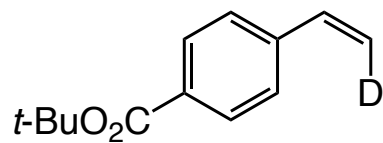

**16**

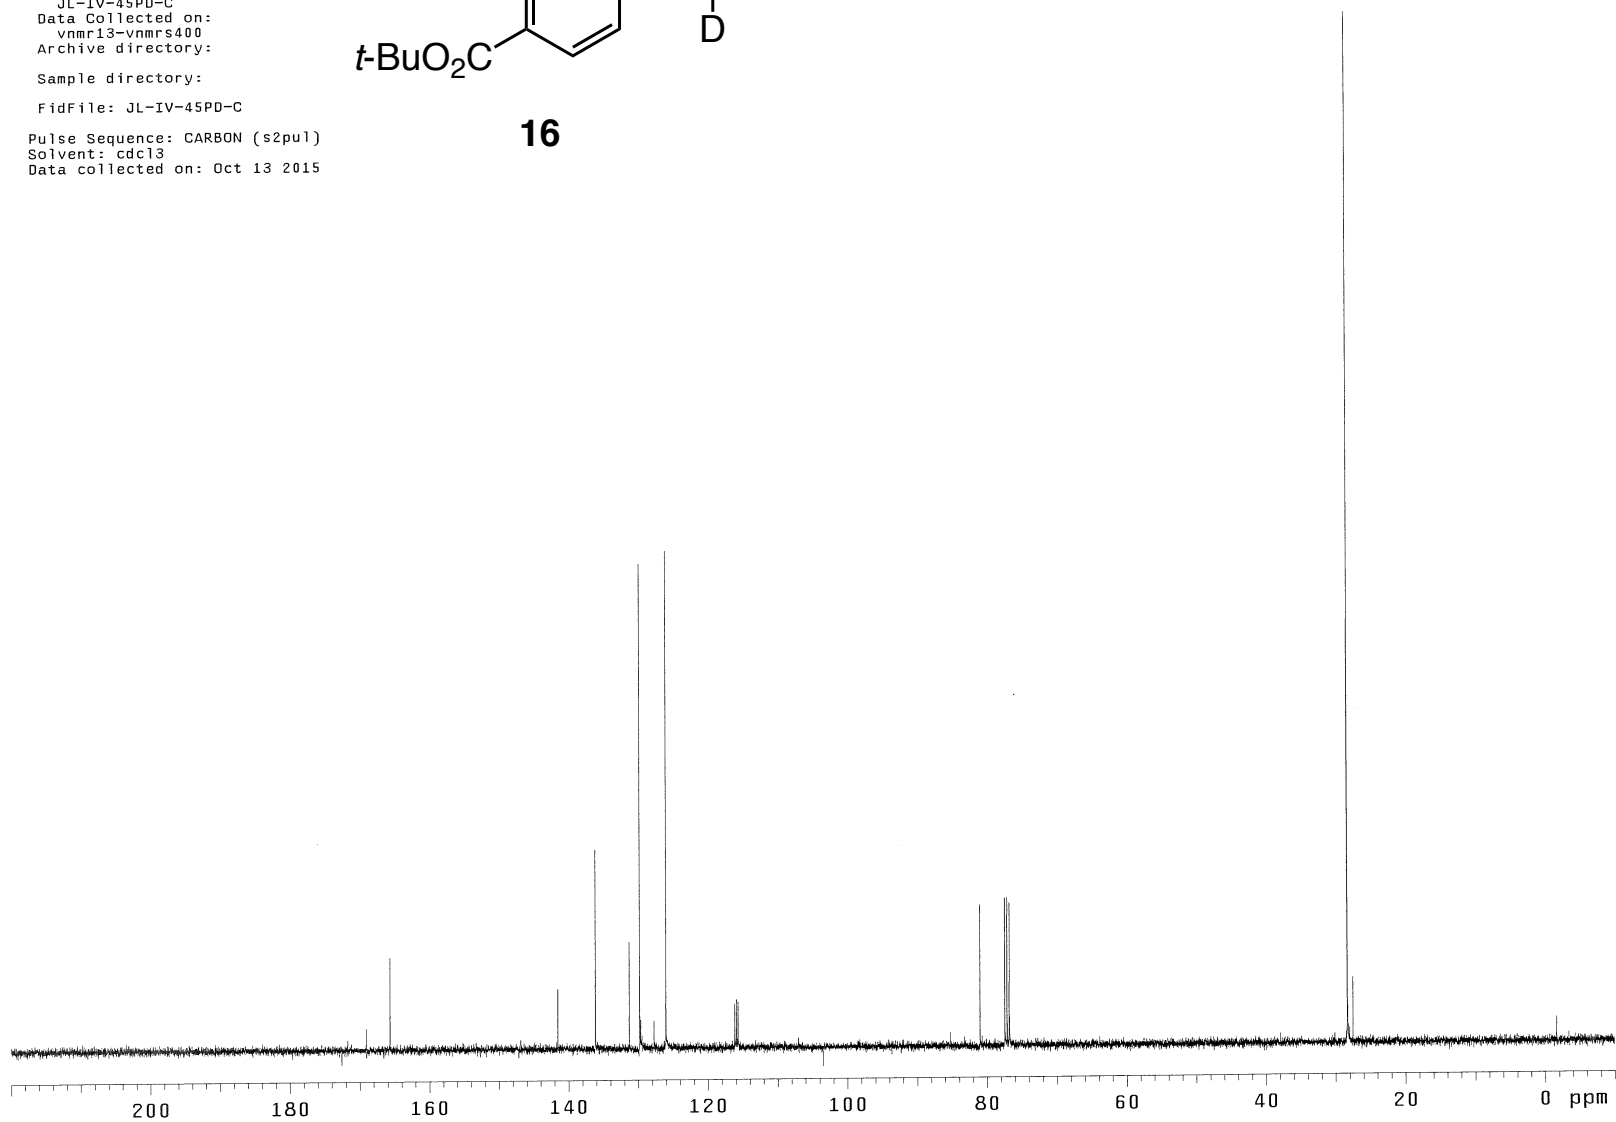

JL-IV-179PD

Sample Name:

JL-IV-179PD

Data Collected on:

nmr13-vnmrs400

Archive directory:

Sample directory:

FidFile: PROTON

Pulse Sequence: PROTON (s2pul)

Solvent: cdcl3

Data collected on: Jan 29 2016

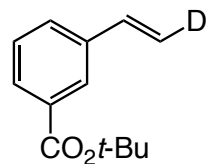

**19**

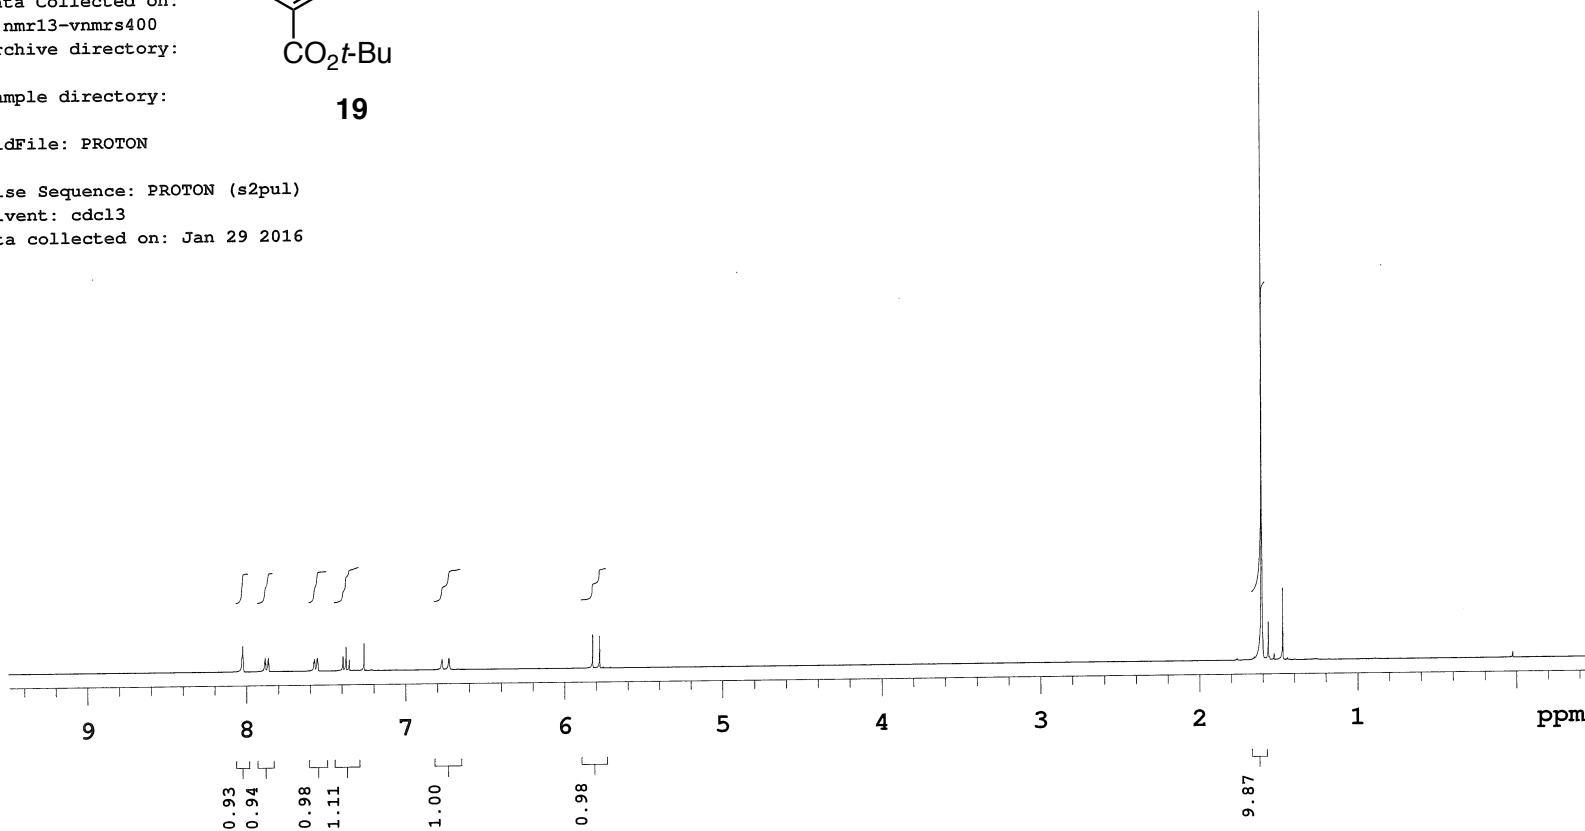

JL-IV-179PD-C

Sample Name:

JL-IV-179PD-C

Data Collected on:

nmr13-vnmrs400

Archive directory:

Sample directory:

FidFile: CARBON

Pulse Sequence: CARBON (s2pul)

Solvent: cdcl3

Data collected on: Jan 30 2016

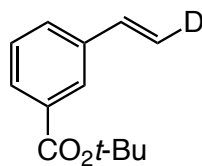

**19**

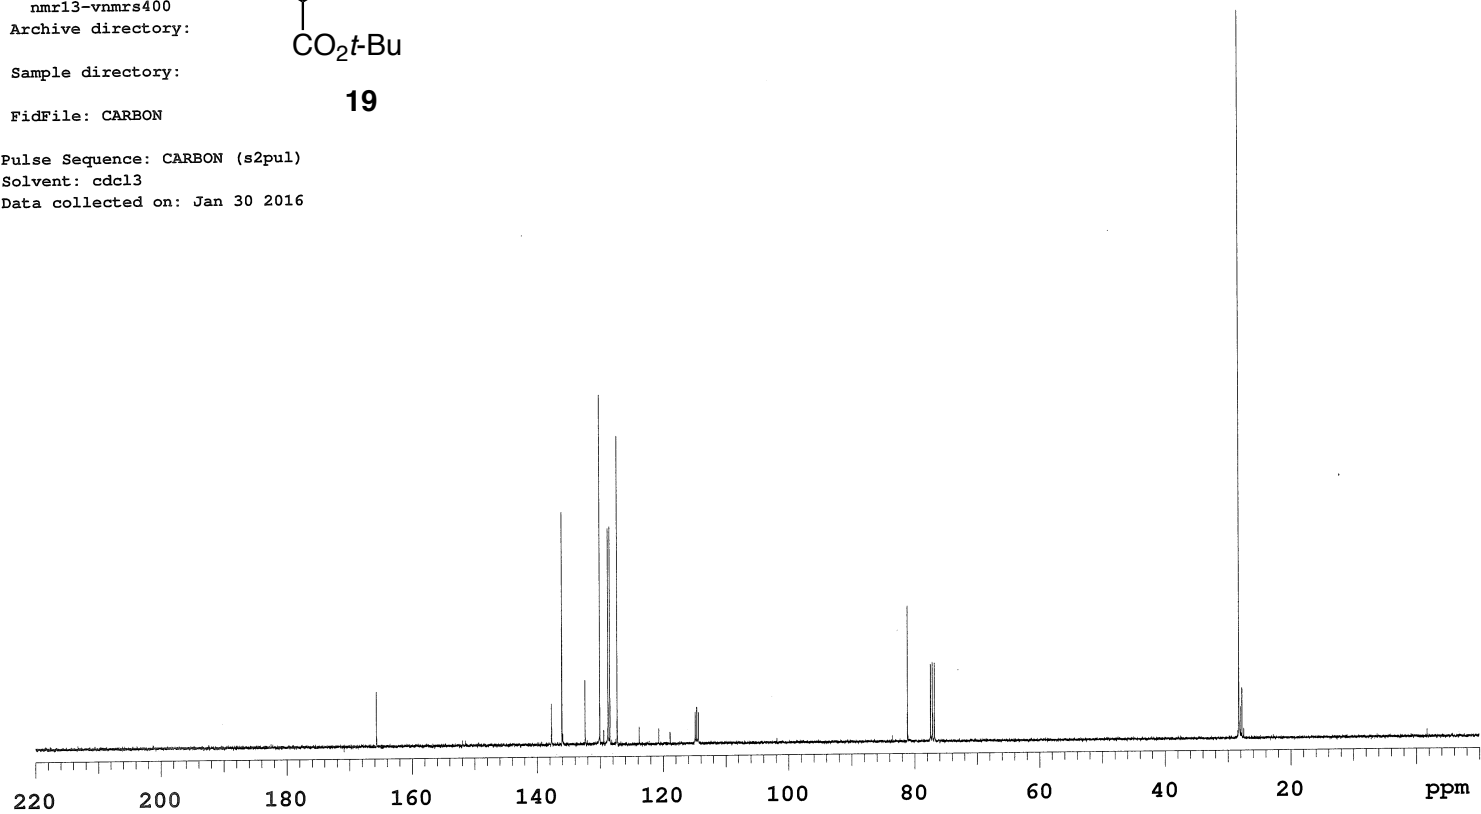



JL-IV-180PD

Sample Name:

JL-IV-180PD

Data Collected on:

nmr13-vnmrs400

Archive directory:

Sample directory:

FidFile: JL-IV-180PD

Pulse Sequence: PROTON (s2pul)

Solvent: cdcl3

Data collected on: Jan 29 2016

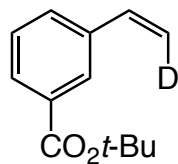

20

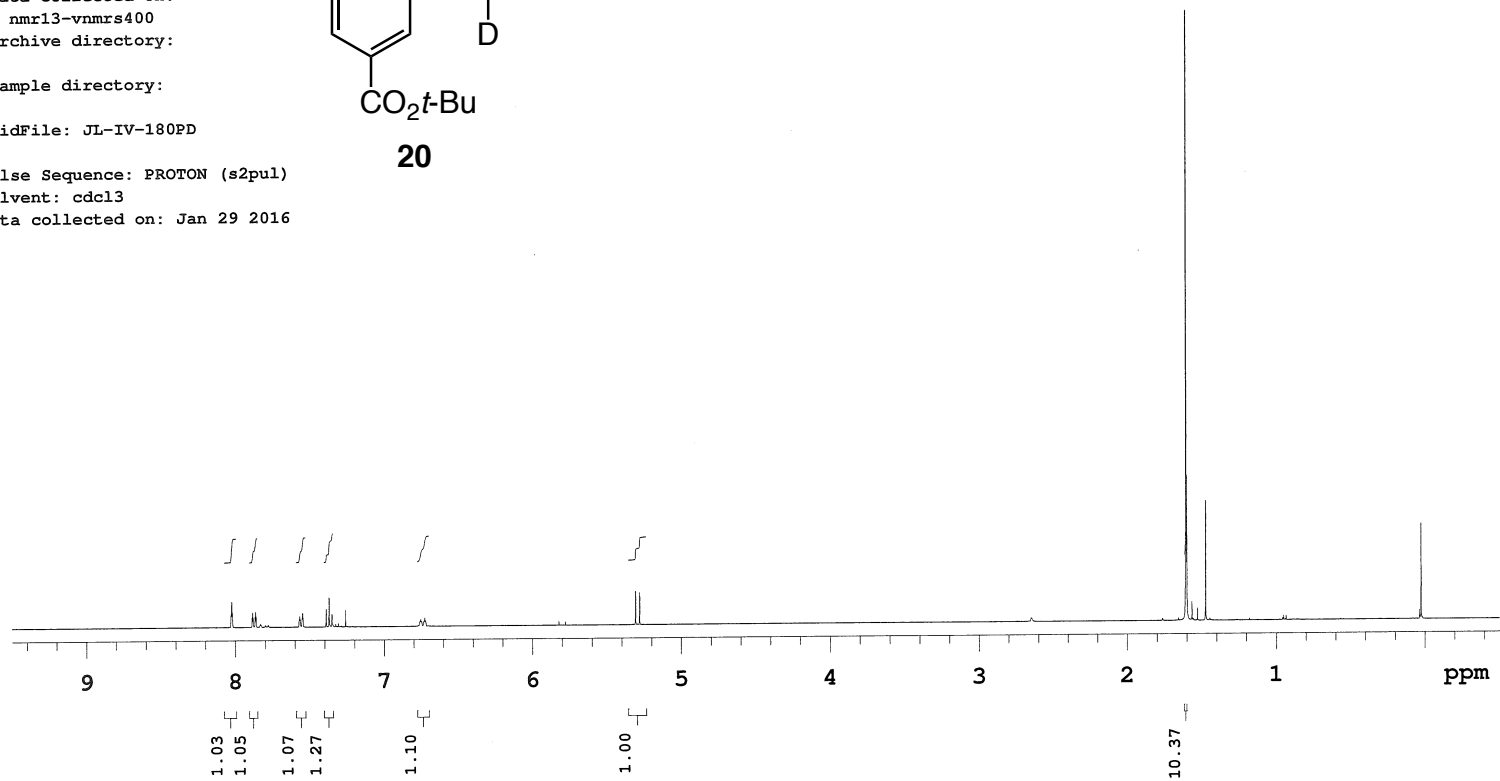

JL-IV-180PD-C

Sample Name:

JL-IV-180PD-C

Data Collected on:

nmr13-vnmrs400

Archive directory:

Sample directory:

FidFile: CARBON

Pulse Sequence: CARBON (s2pul)

Solvent: cdcl3

Data collected on: Jan 30 2016

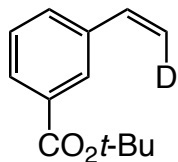

**20**

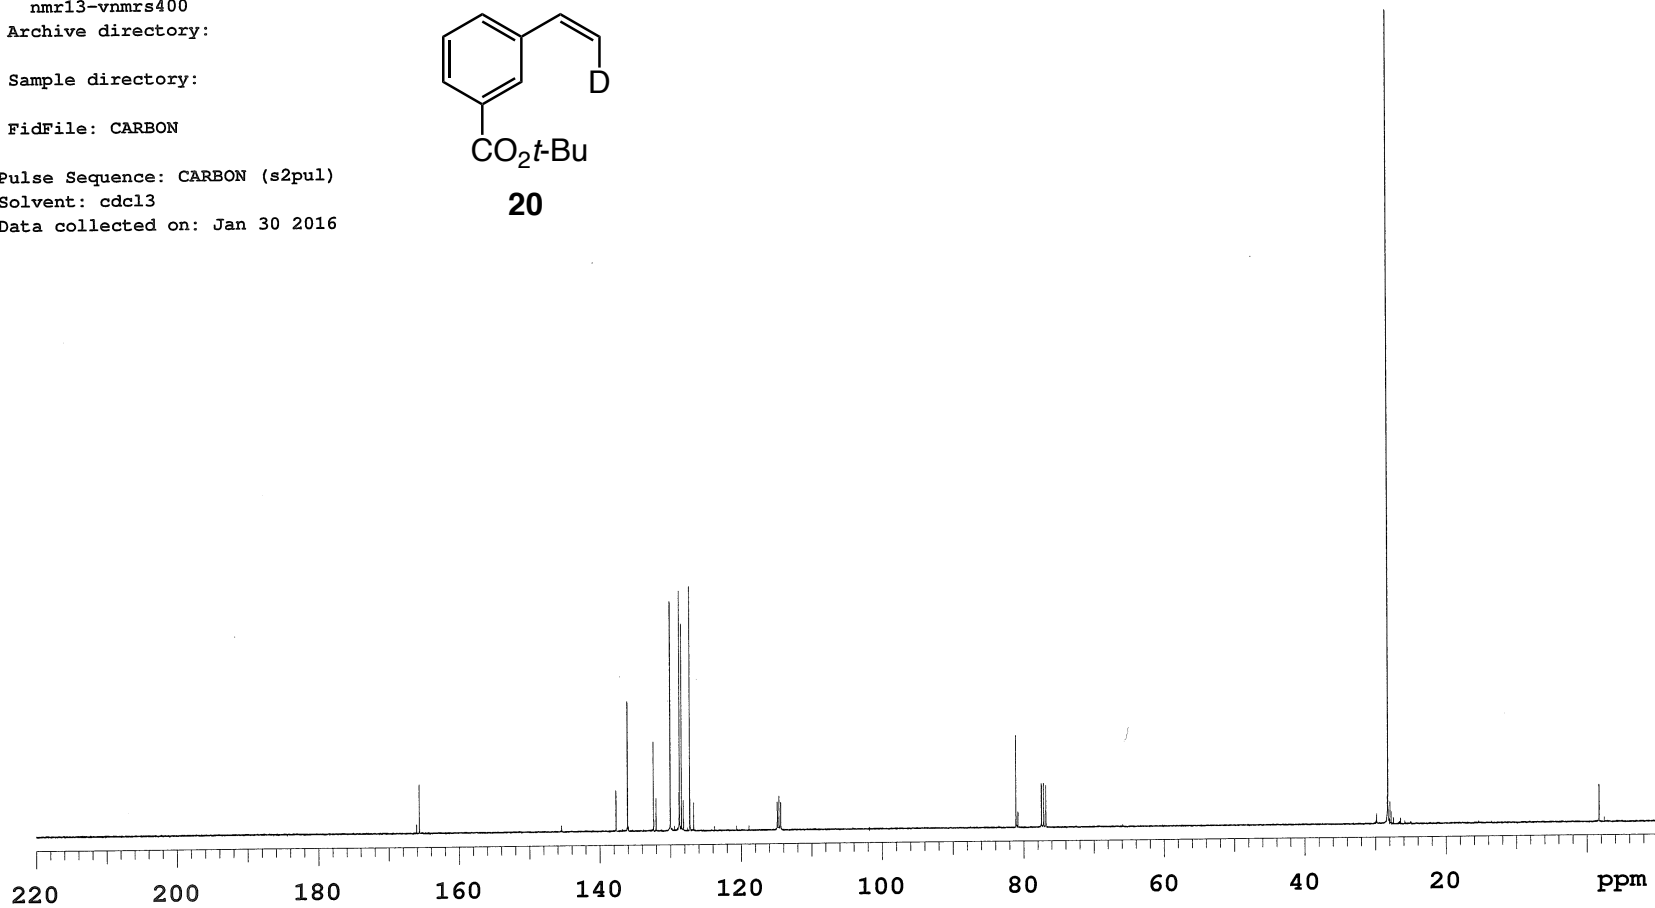

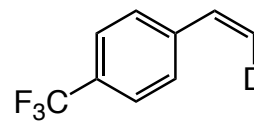

(Z)-1-(trifluoromethyl)-4-(vinyl-2-d)benzene

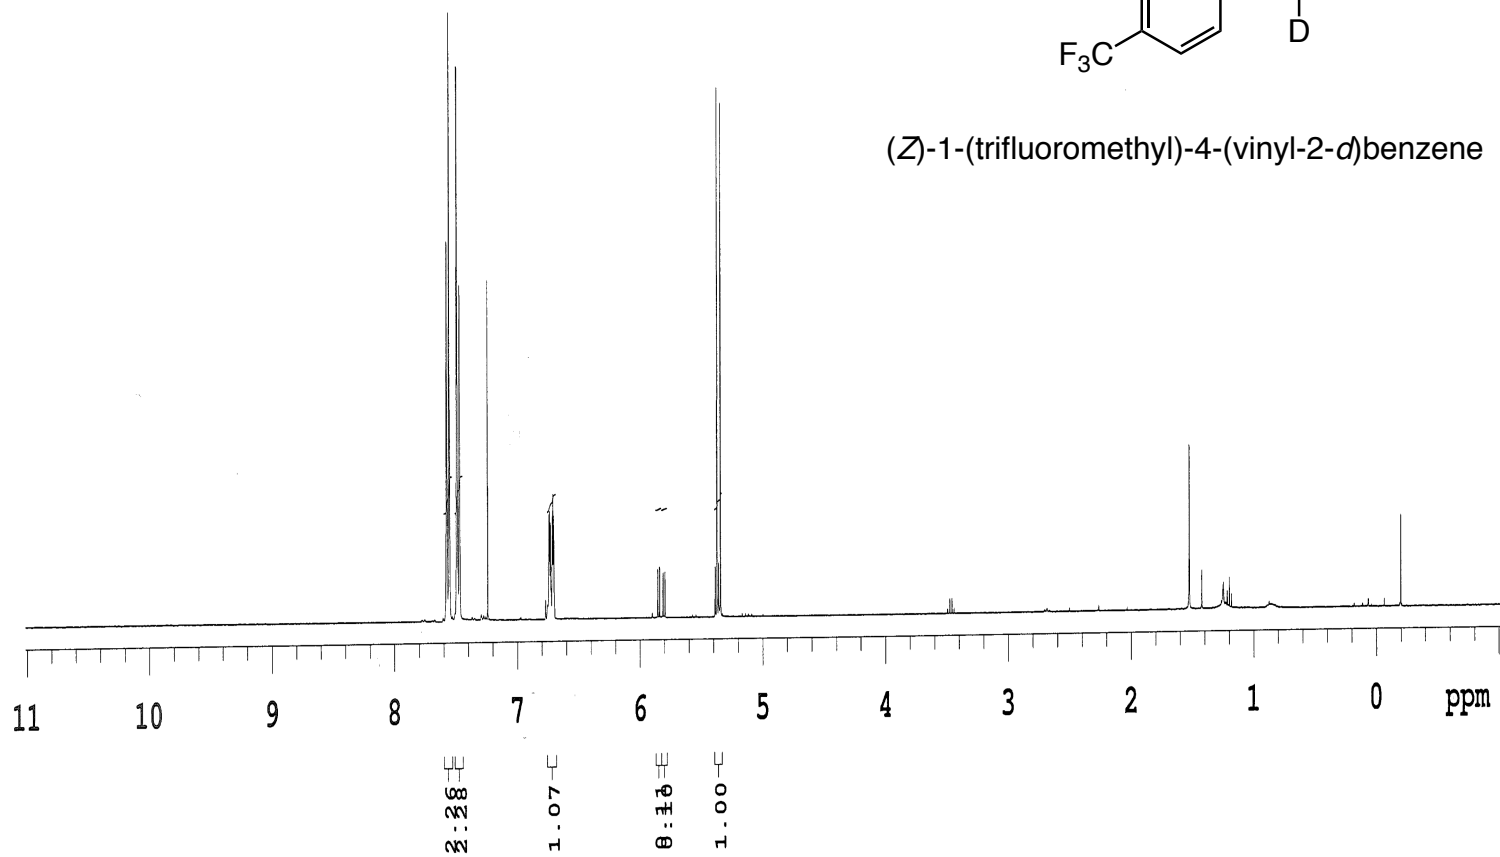

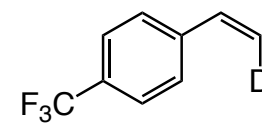

(*Z*)-1-(trifluoromethyl)-4-(vinyl-2-*d*)benzene

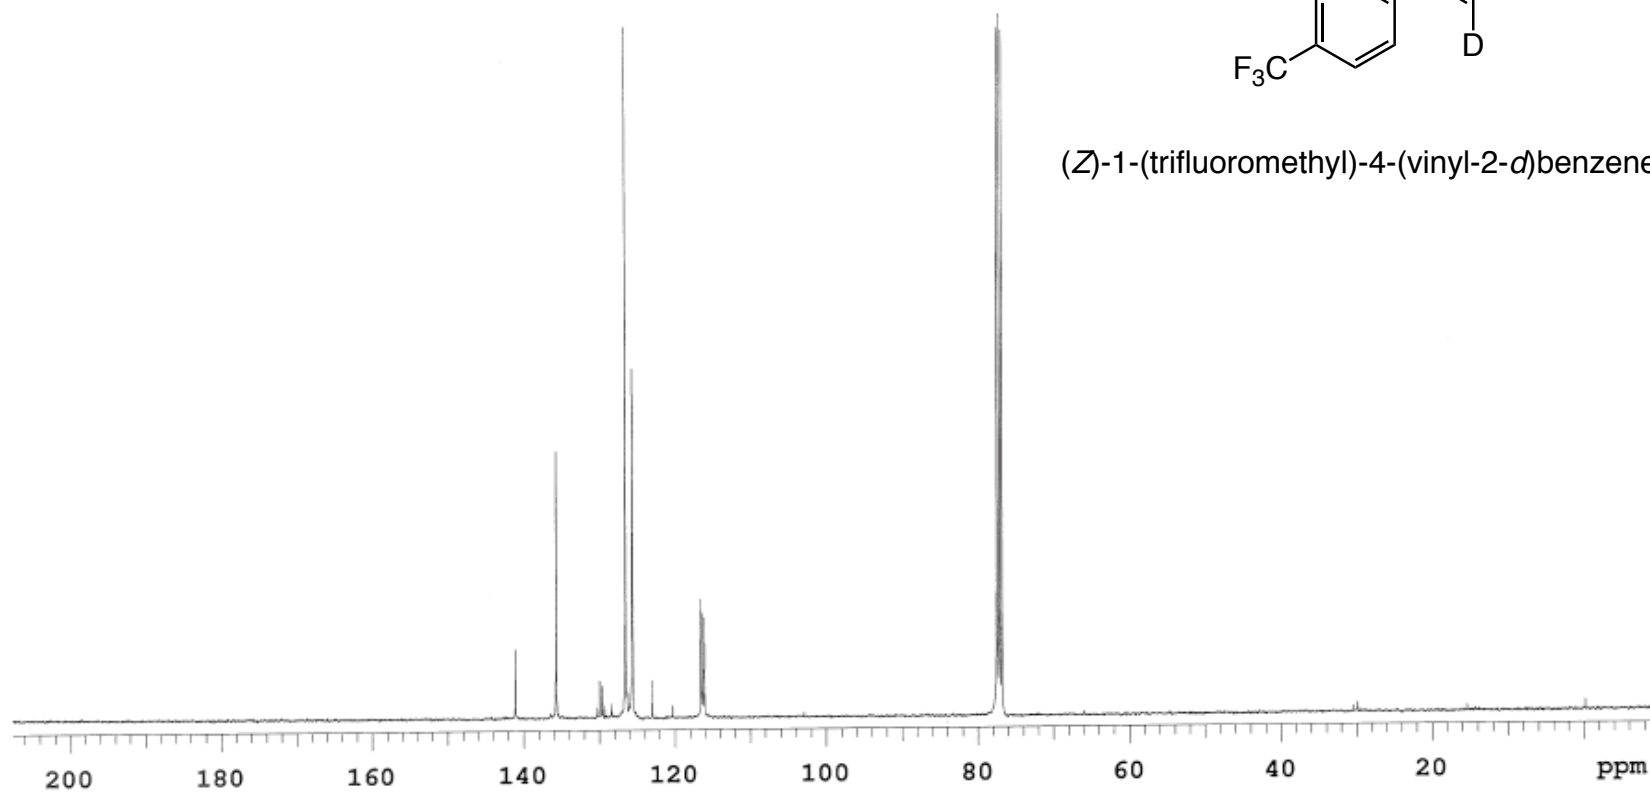

JL-IV-46PD  
Sample Name:  
JL-IV-46PD  
Data Collected on:  
vnmr13-vnmrs400  
Archive directory:  
Sample directory:  
FidFile: JL-IV-46-2PD  
Pulse Sequence: PROTON (s2pu1)  
Solvent: cdc13  
Data collected on: Oct 10 2015

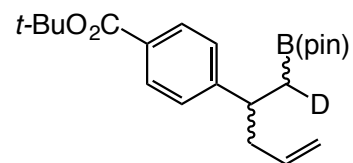

**2k-d**  
from *E* olefin

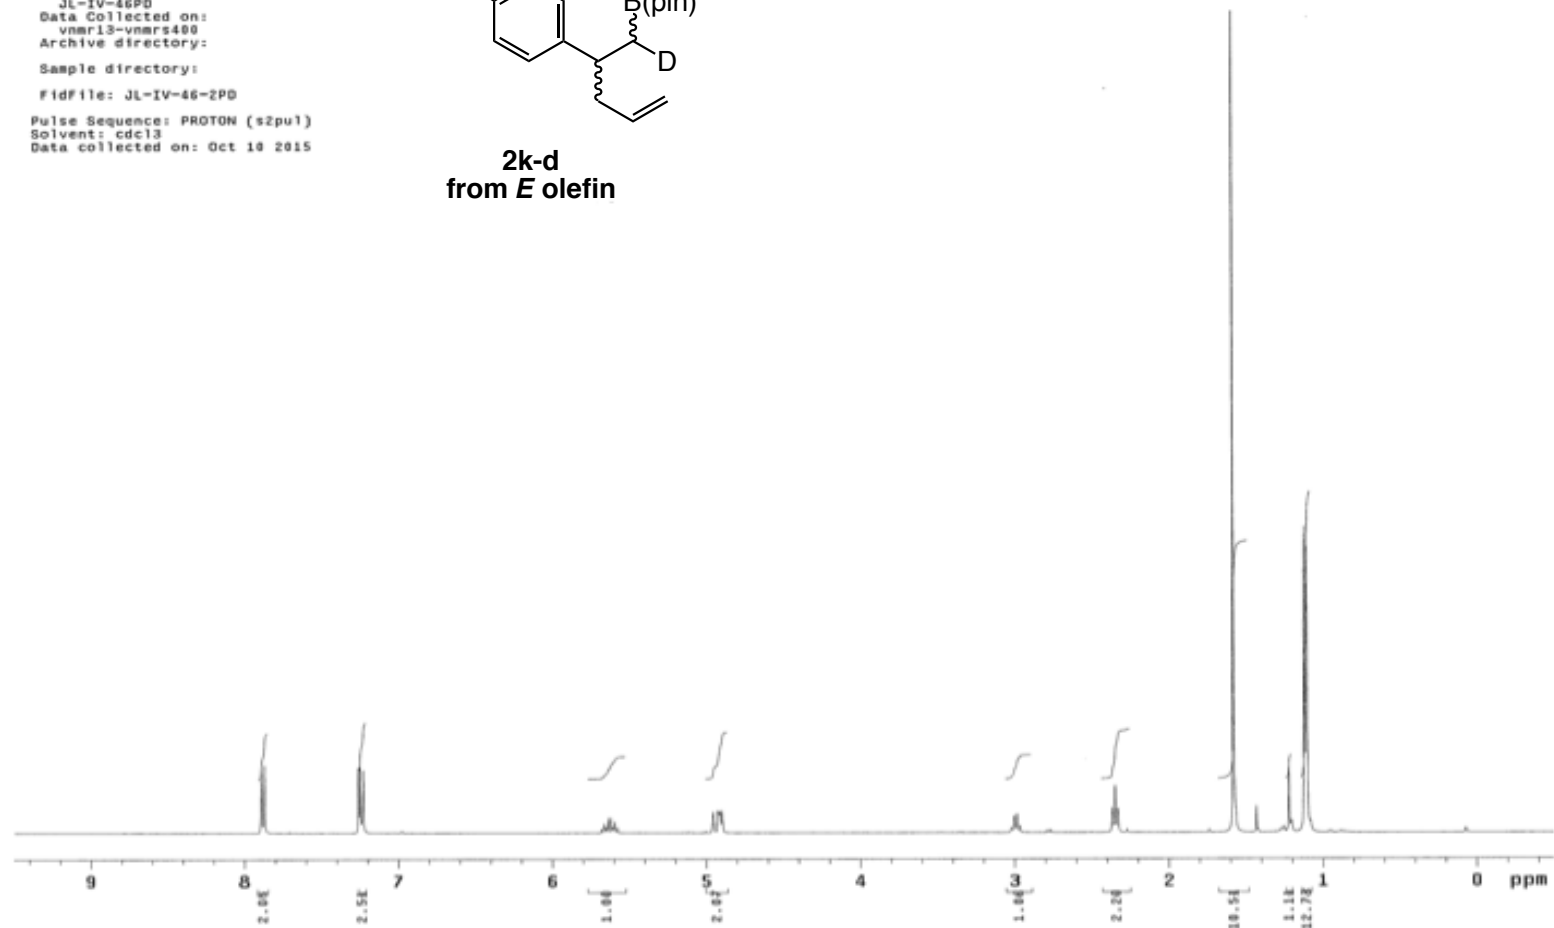

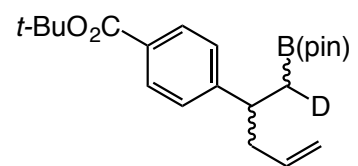

**2k-d**  
from *E* olefin

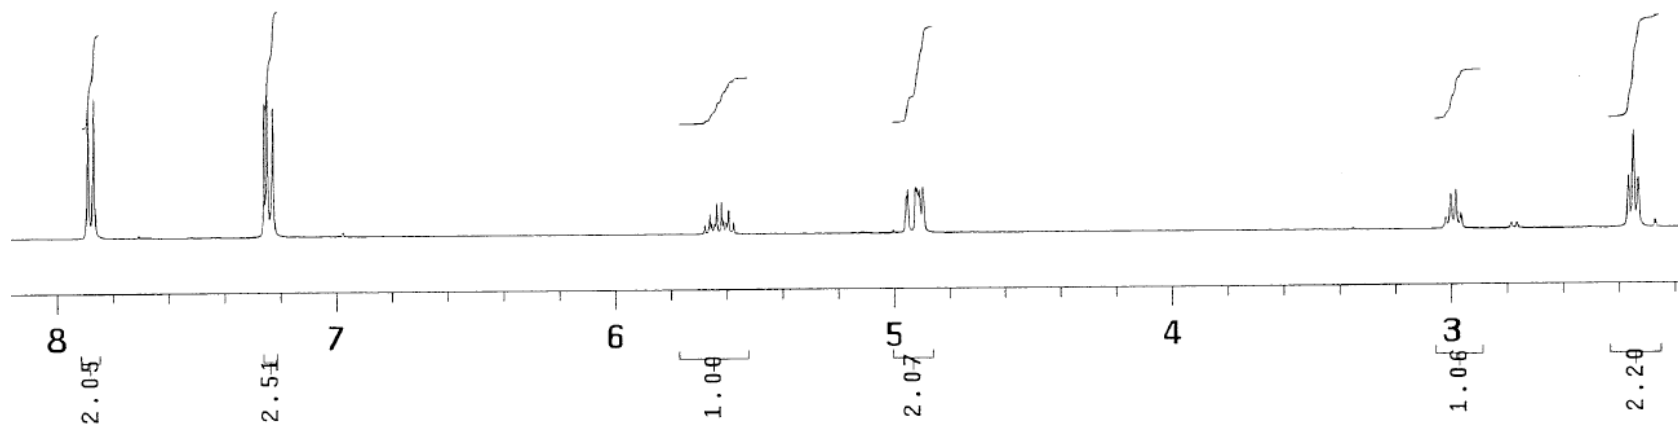

JL-IV-46PD

Sample Name:  
JL-IV-46PD  
Data Collected on:  
vnmr13-vnmrs400  
Archive directory:  
Sample directory:

FidFile: JL-IV-46PD-C

Pulse Sequence: CARBON (s2pu1)  
Solvent: cdcl3  
Data collected on: Oct 10 2015

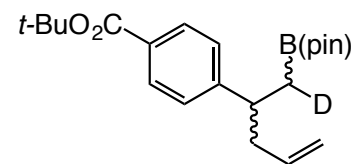

**2k-d**  
from *E* olefin

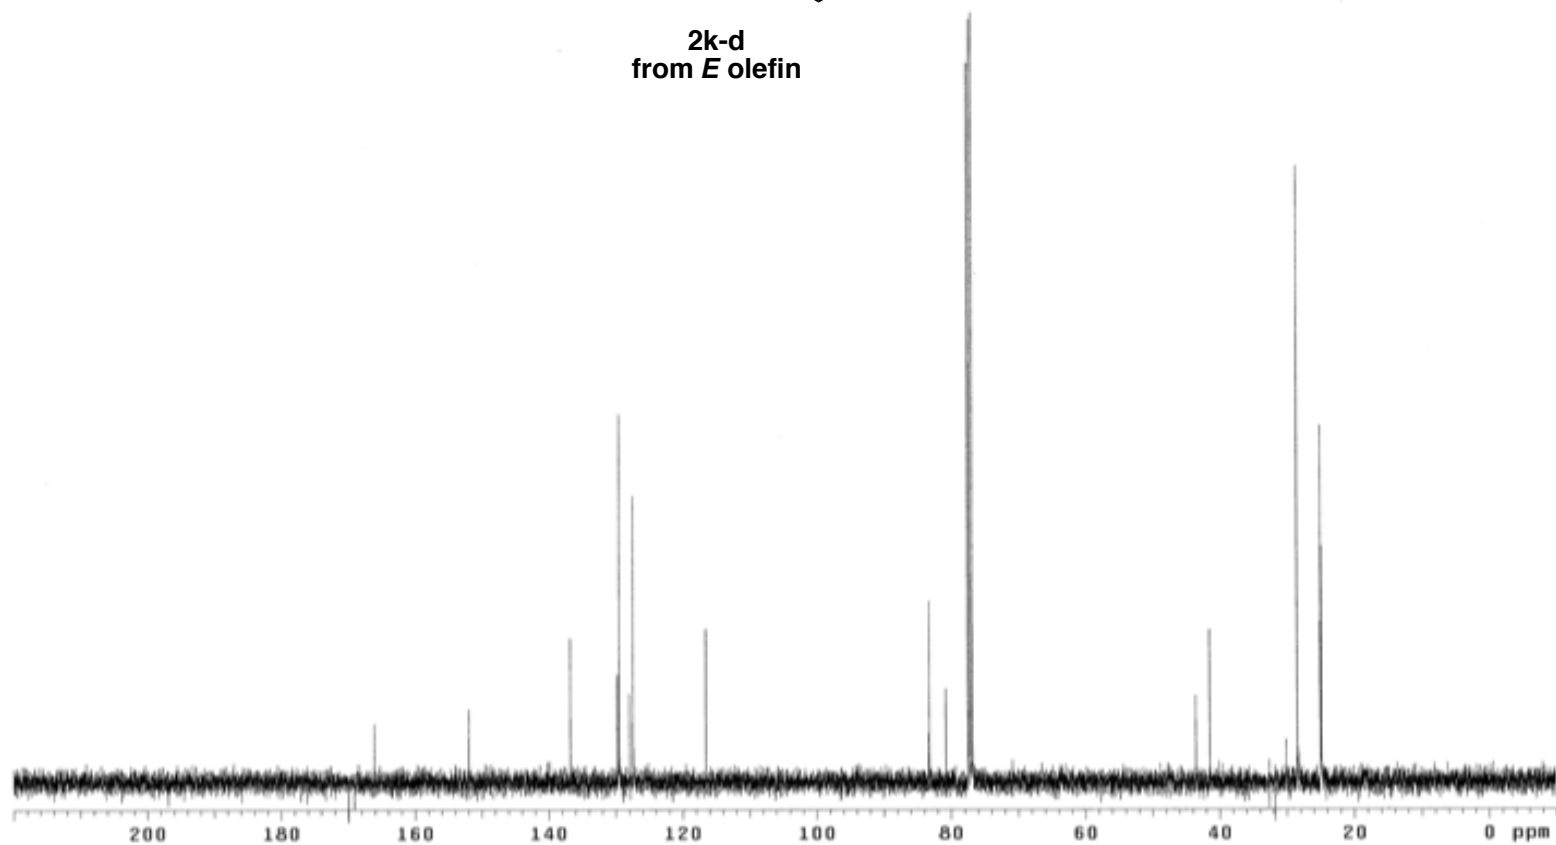

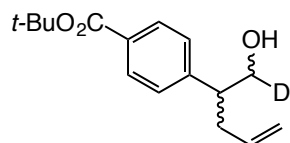

oxidation product of 2k-d  
from *E* olefin  
60:40 d.r.

Sample Name:  
JL-IV-48PD  
Data Collected on:  
nmr19-vnmrs600  
Archive directory:  
  
Sample directory:  
  
FidFile: PROTON  
  
Pulse Sequence: PROTON (s2pul)  
Solvent: cdcl3  
Data collected on: Oct 16 2015

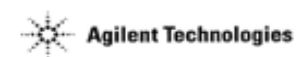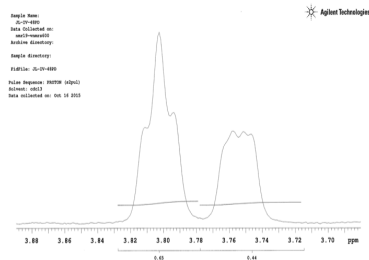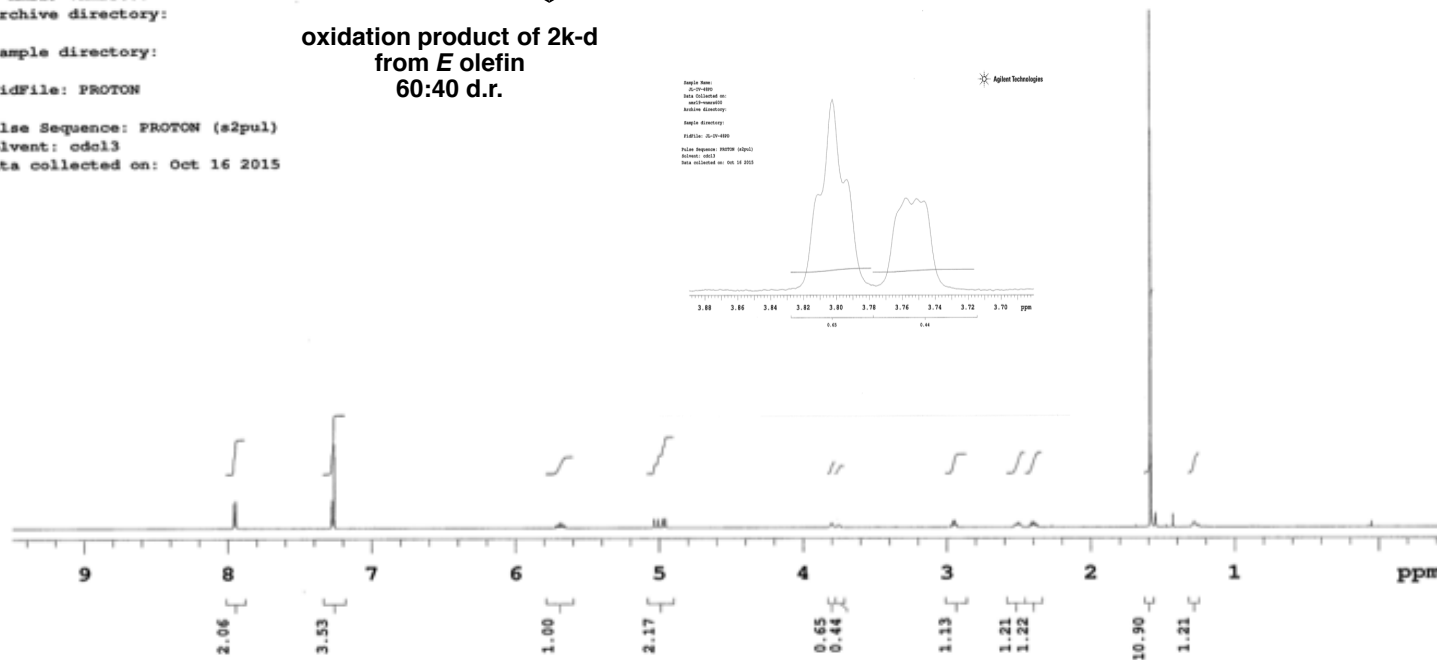



JL-IV-47PD  
Sample Name:  
JL-IV-47PD  
Data Collected on:  
vnmr13-vnmrs400  
Archive directory:  
Sample directory:  
FidFile: JL-IV-47PD-1  
Pulse Sequence: PROTON (s2pu1)  
Solvent: cdcl3  
Data collected on: Oct 10 2015

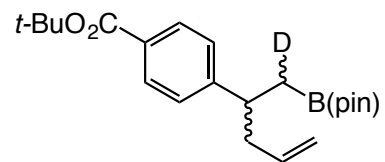

**2k-d**  
from *Z* olefin

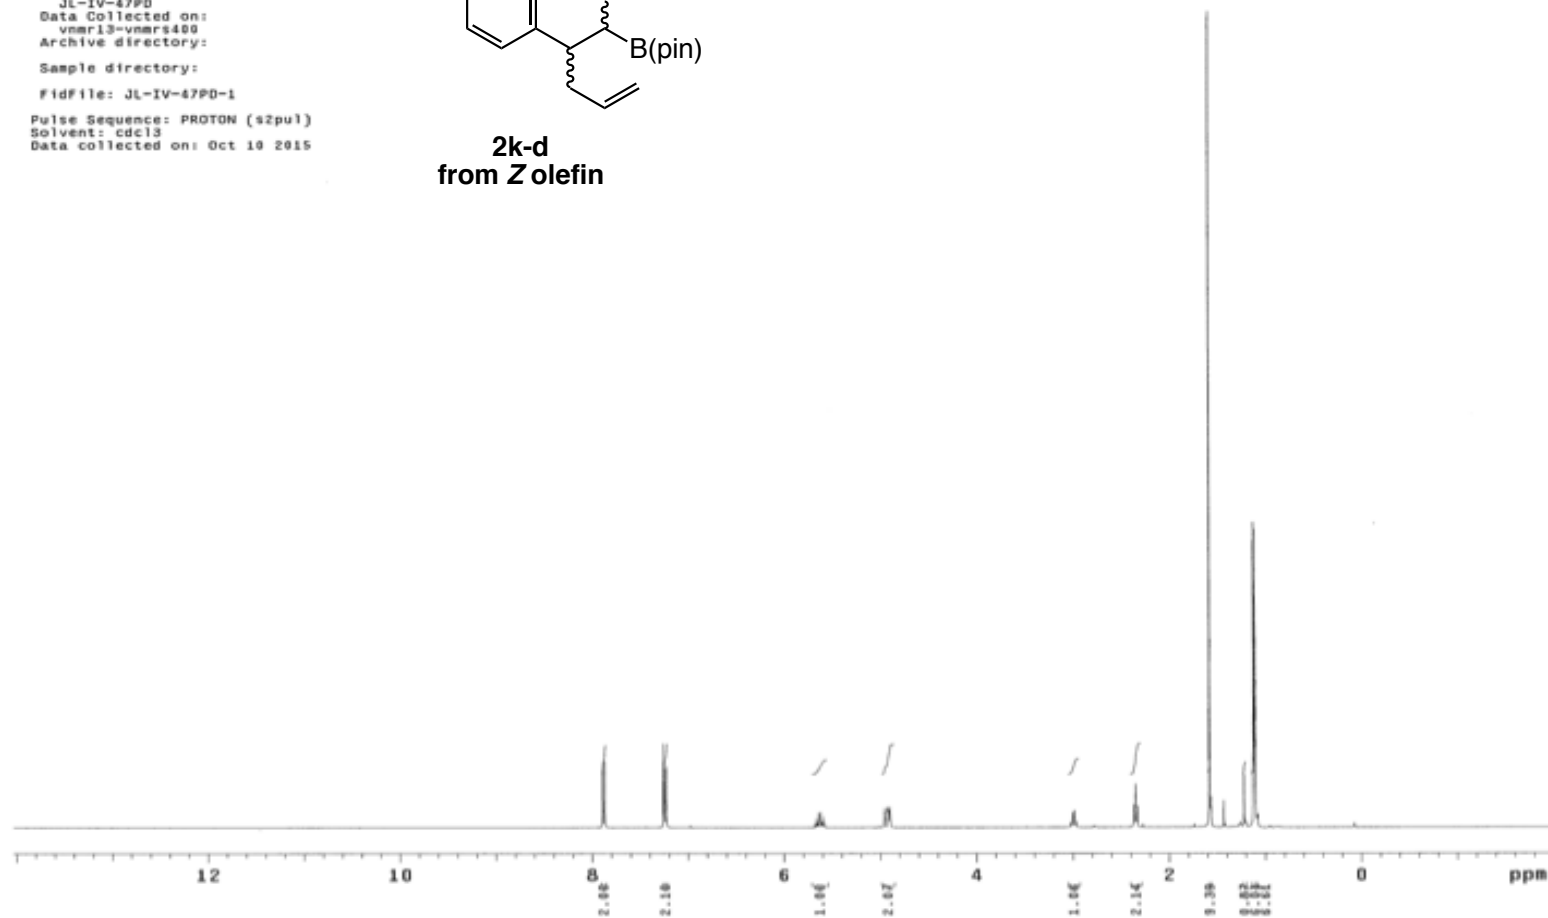

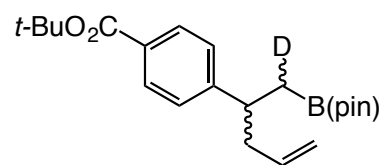

**2k-d**  
from *Z* olefin

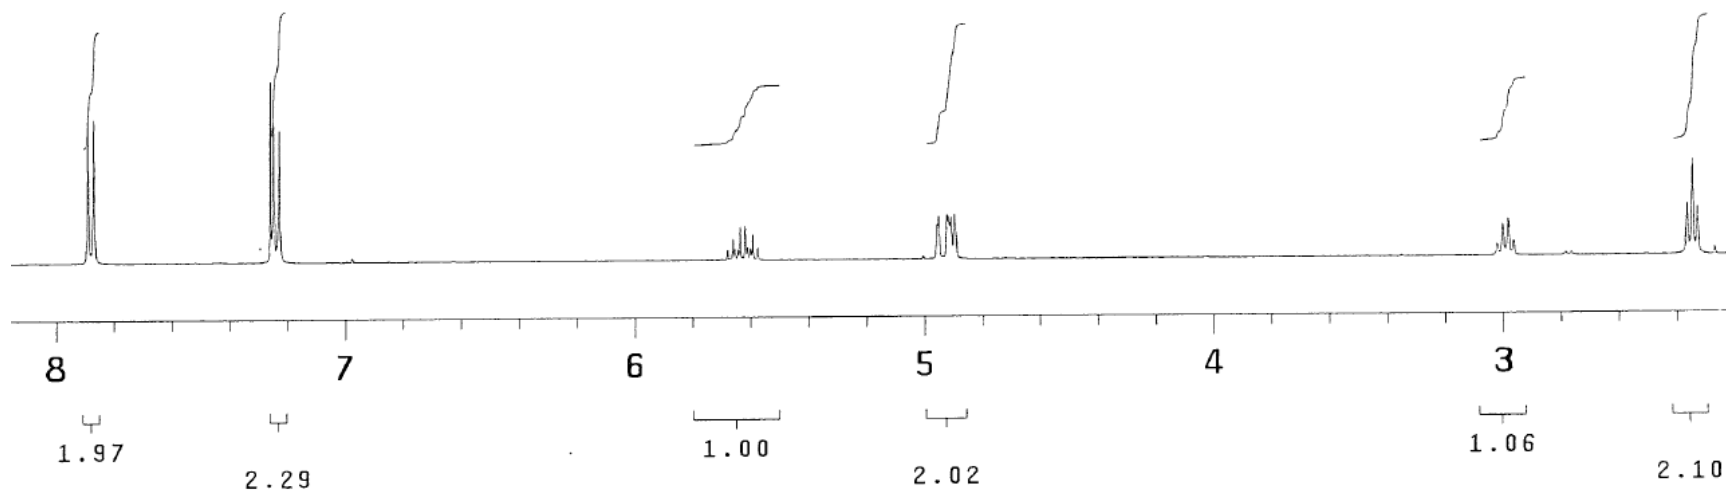

JL-IV-47PD  
Sample Name:  
JL-IV-47PD  
Data Collected on:  
vnmr13-vnmrs499  
Archive directory:  
Sample directory:  
Fidfile: JL-IV-47PD-C  
Pulse Sequence: CARBON (s2pu1)  
Solvent: cdcl3  
Data collected on: Oct 10 2015

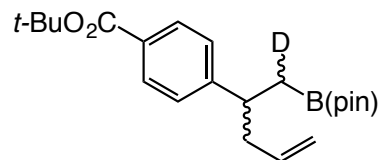

**2k-d**  
from Zolefin

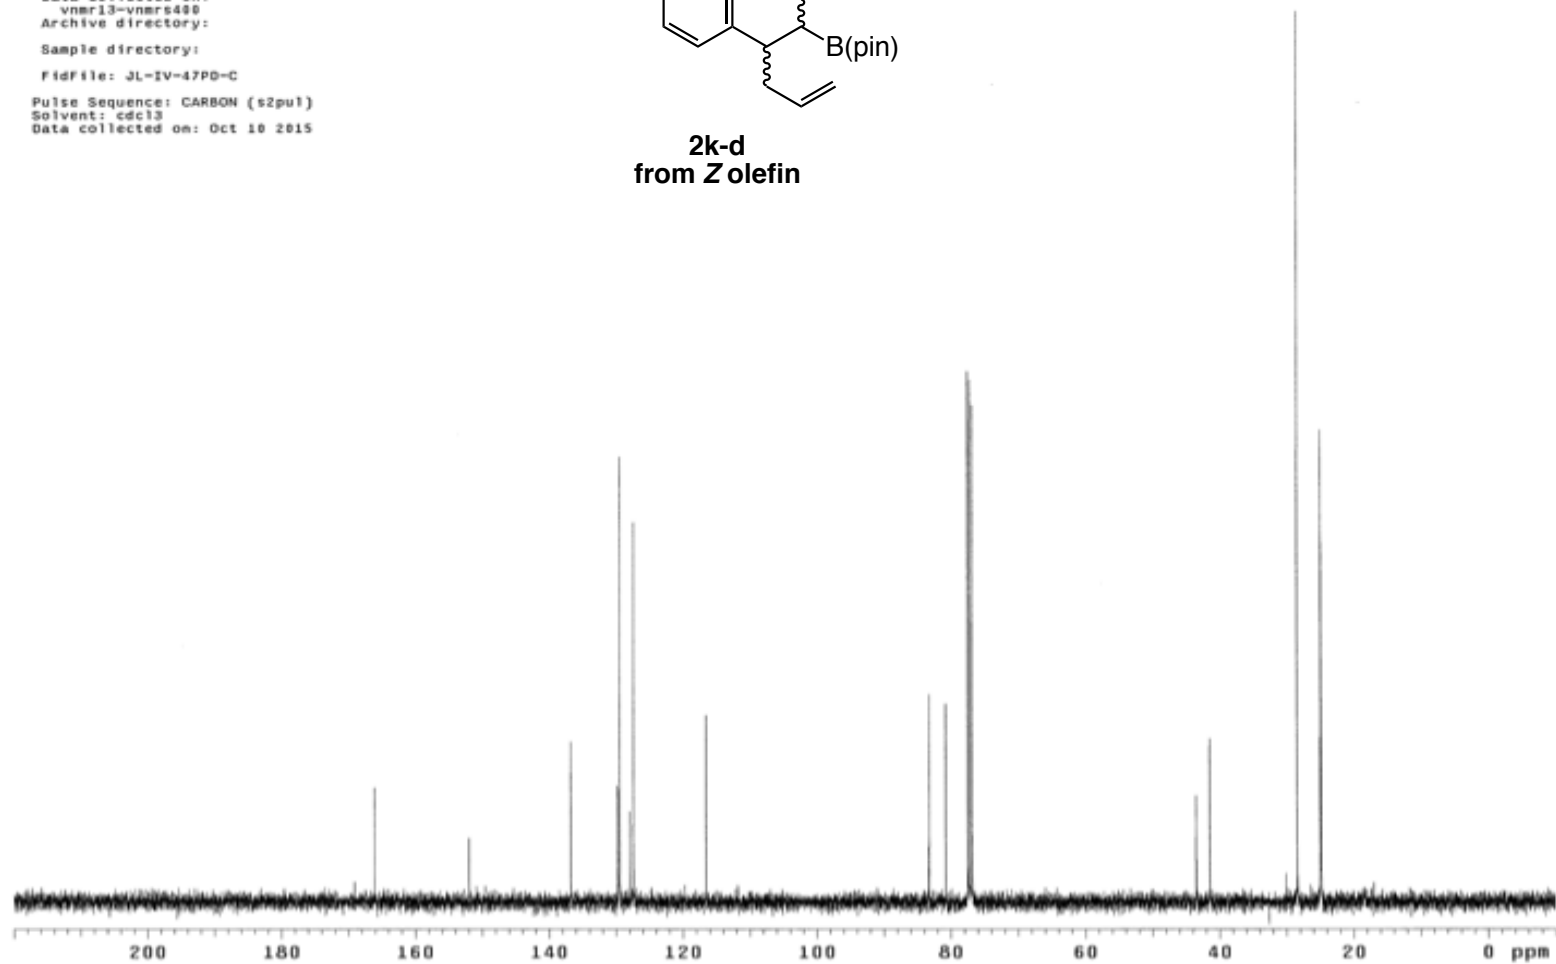

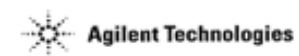

Sample Name:  
 JL-IV-49PD  
 Data Collected on:  
 nmr19-vnmrs600  
 Archive directory:  
 Sample directory:  
 FidFile: PROTON  
 Pulse Sequence: PROTON (s2pul)  
 Solvent: cdcl3  
 Data collected on: Oct 16 2015

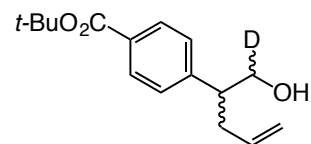

oxidation product of 2k-d  
 from Z olefin  
 35:65 d.r.

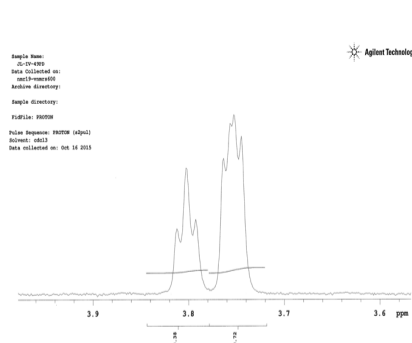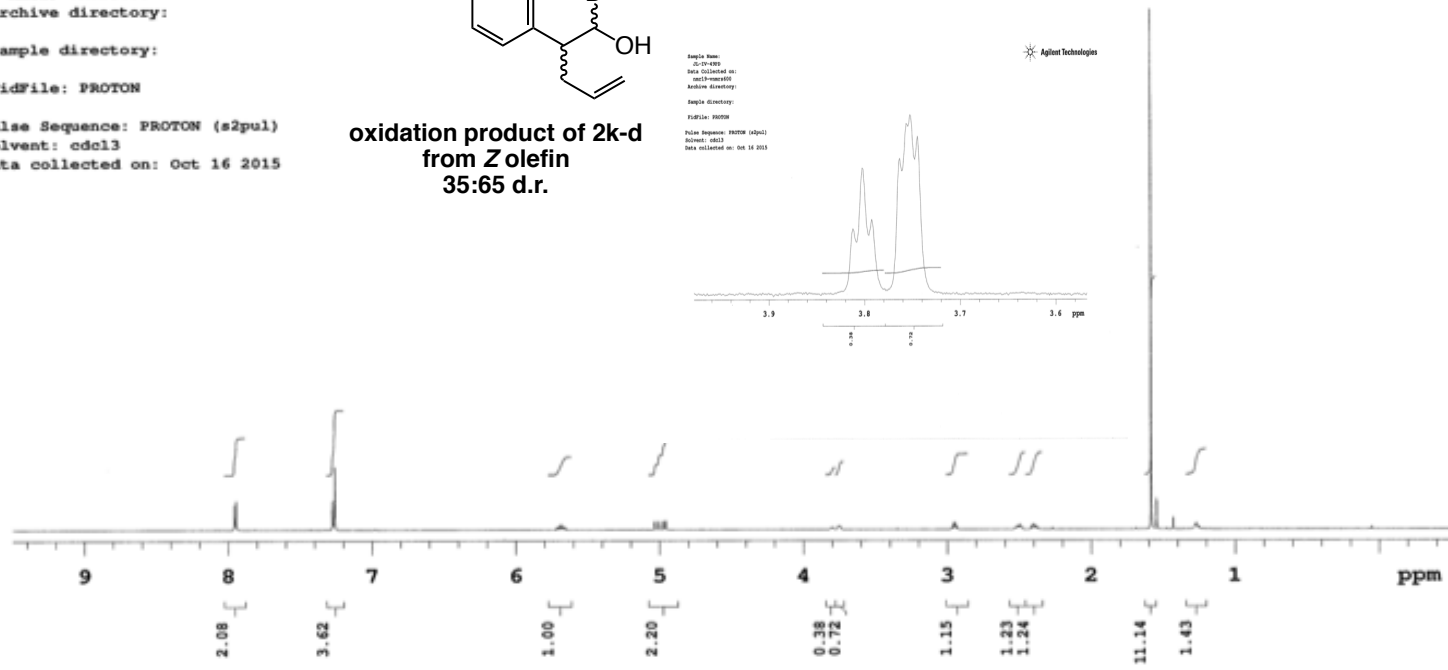

JL-IV-57PD

Sample Name:  
JL-IV-57PD  
Data Collected on:  
vnmr13-vnars400  
Archive directory:  
Sample directory:

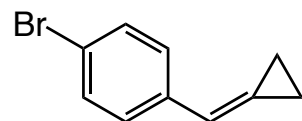

**27**

FidFile: JL-IV-57PD  
Pulse Sequence: PROTON (s2pul)  
Solvent: cdcl3  
Data collected on: Oct 30 2015

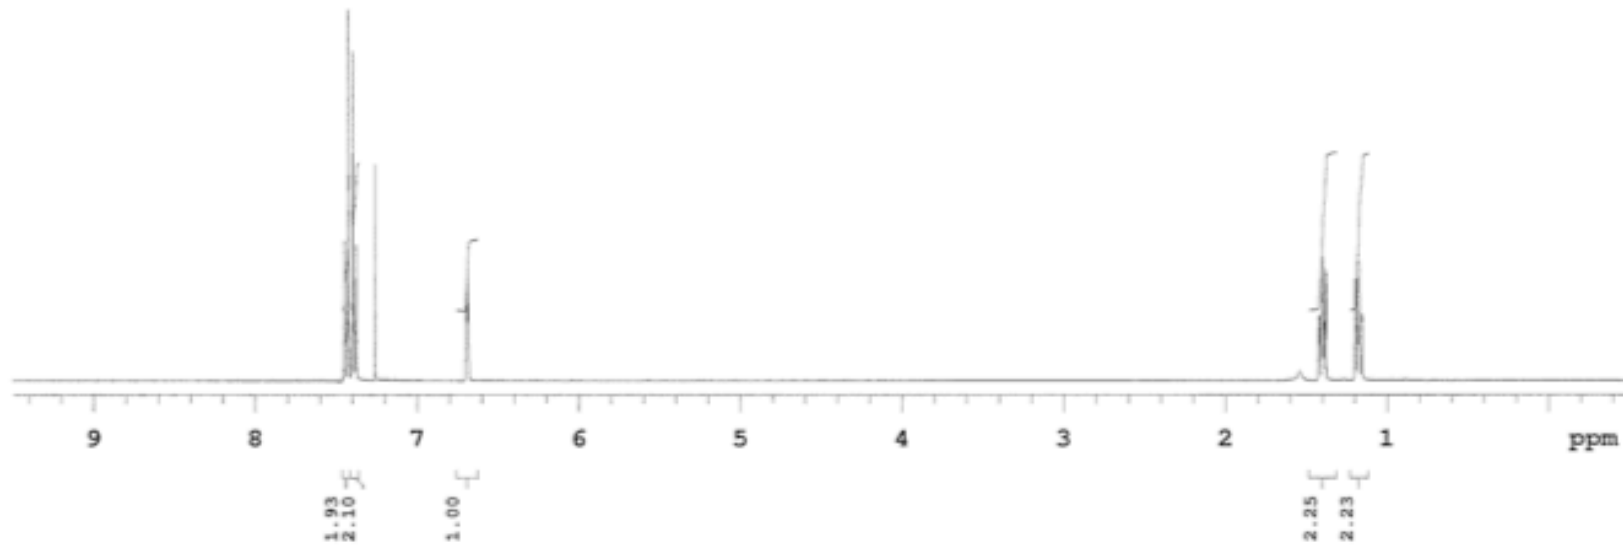

JL-IV-67CD

Sample Name:

JL-IV-67CD

Data Collected on:

vnmr13-vnmrs400

Archive directory:

Sample directory:

FidFile: JL-IV-67PD

Pulse Sequence: PROTON (s2pul)

Solvent: cdcl3

Data collected on: Nov 5 2015

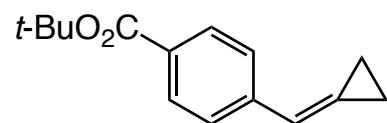

28

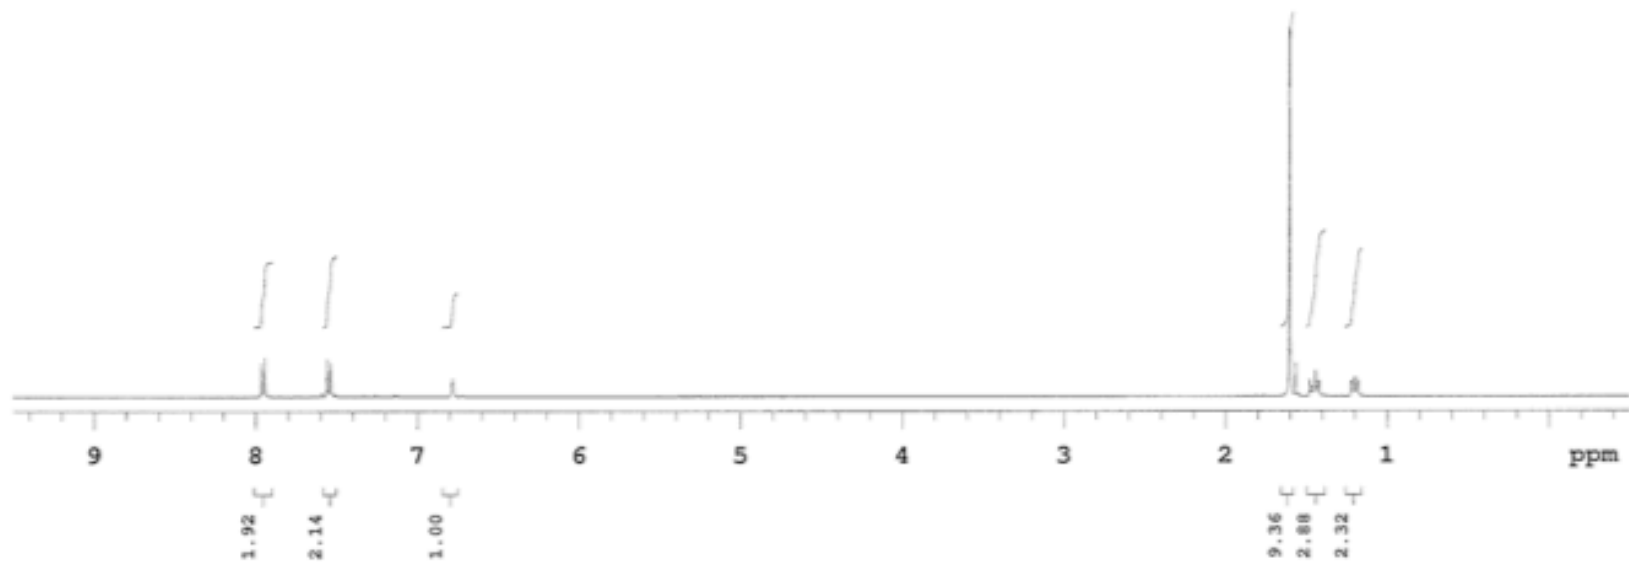

JL-IV-67CD

Sample Name:  
JL-IV-67CD

Data Collected on:  
vnmr13-vnmrs400  
Archive directory:

Sample directory:

FidFile: JL-IV-67PD-C

Pulse Sequence: CARBON (s2pul)  
Solvent: cdcl3  
Data collected on: Nov 5 2015

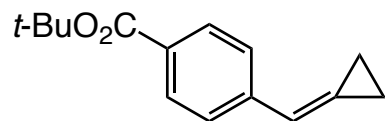

**28**

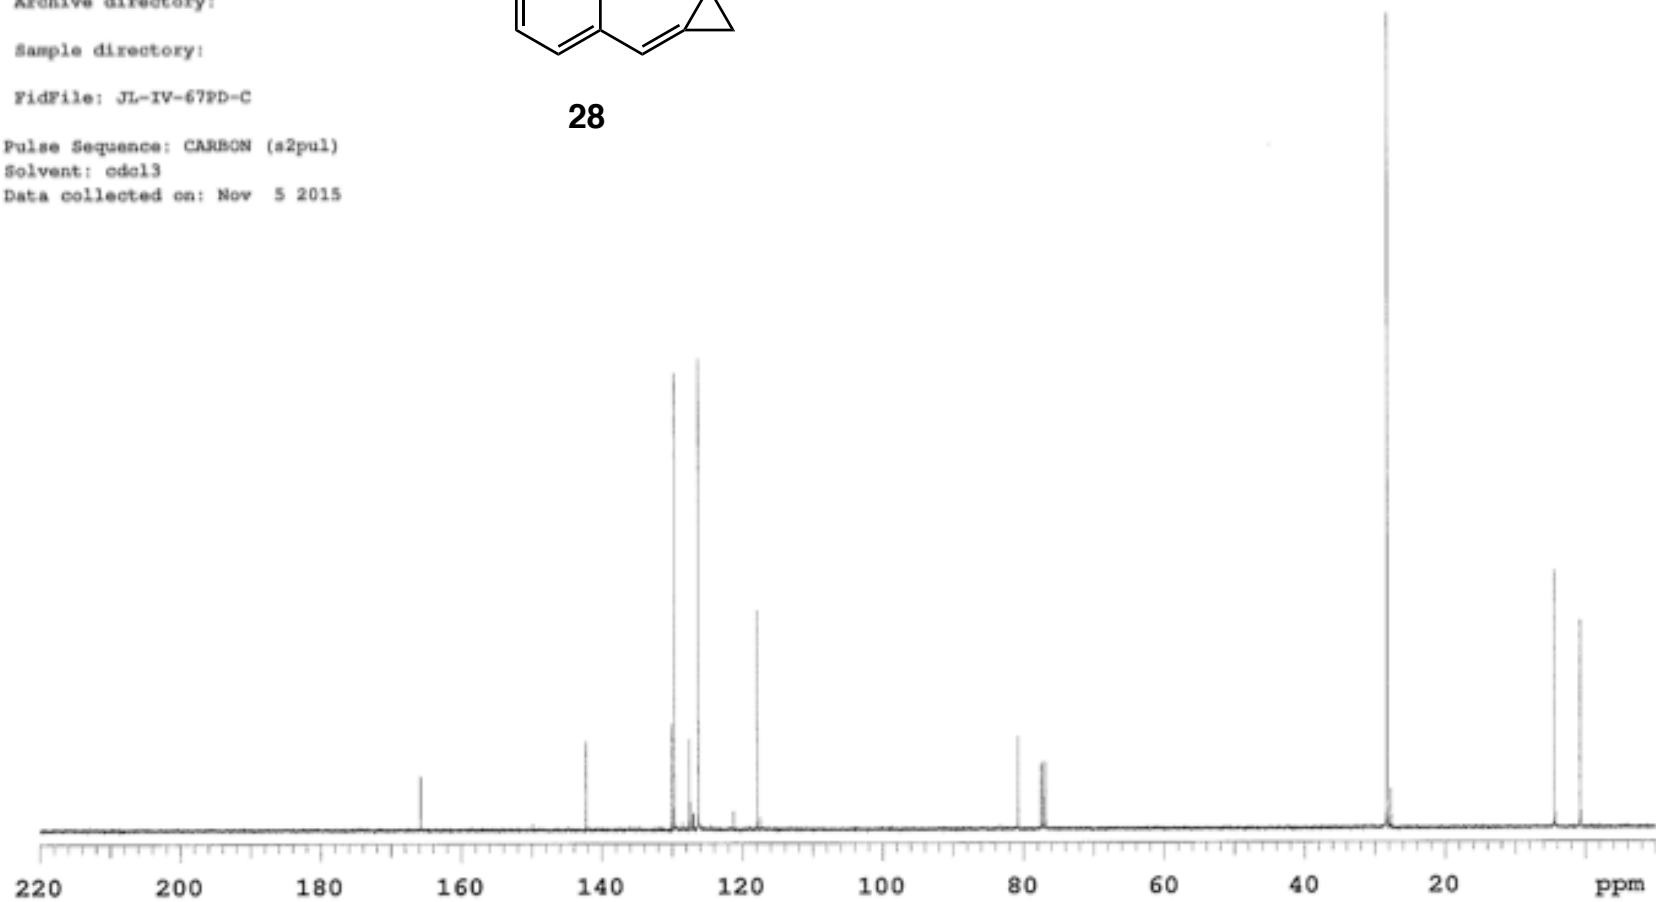

JL-IV-72-2PD

Sample Name:

JL-IV-72-2PD

Data Collected on:

vnmr13-vnmrs400

Archive directory:

Sample directory:

FidFile: JL-IV-72-2PD

Pulse Sequence: PROTON (s2pul)

Solvent: cdcl3

Data collected on: Nov 6 2015

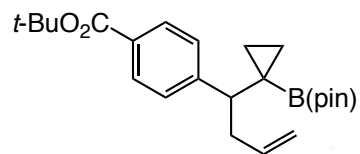

29

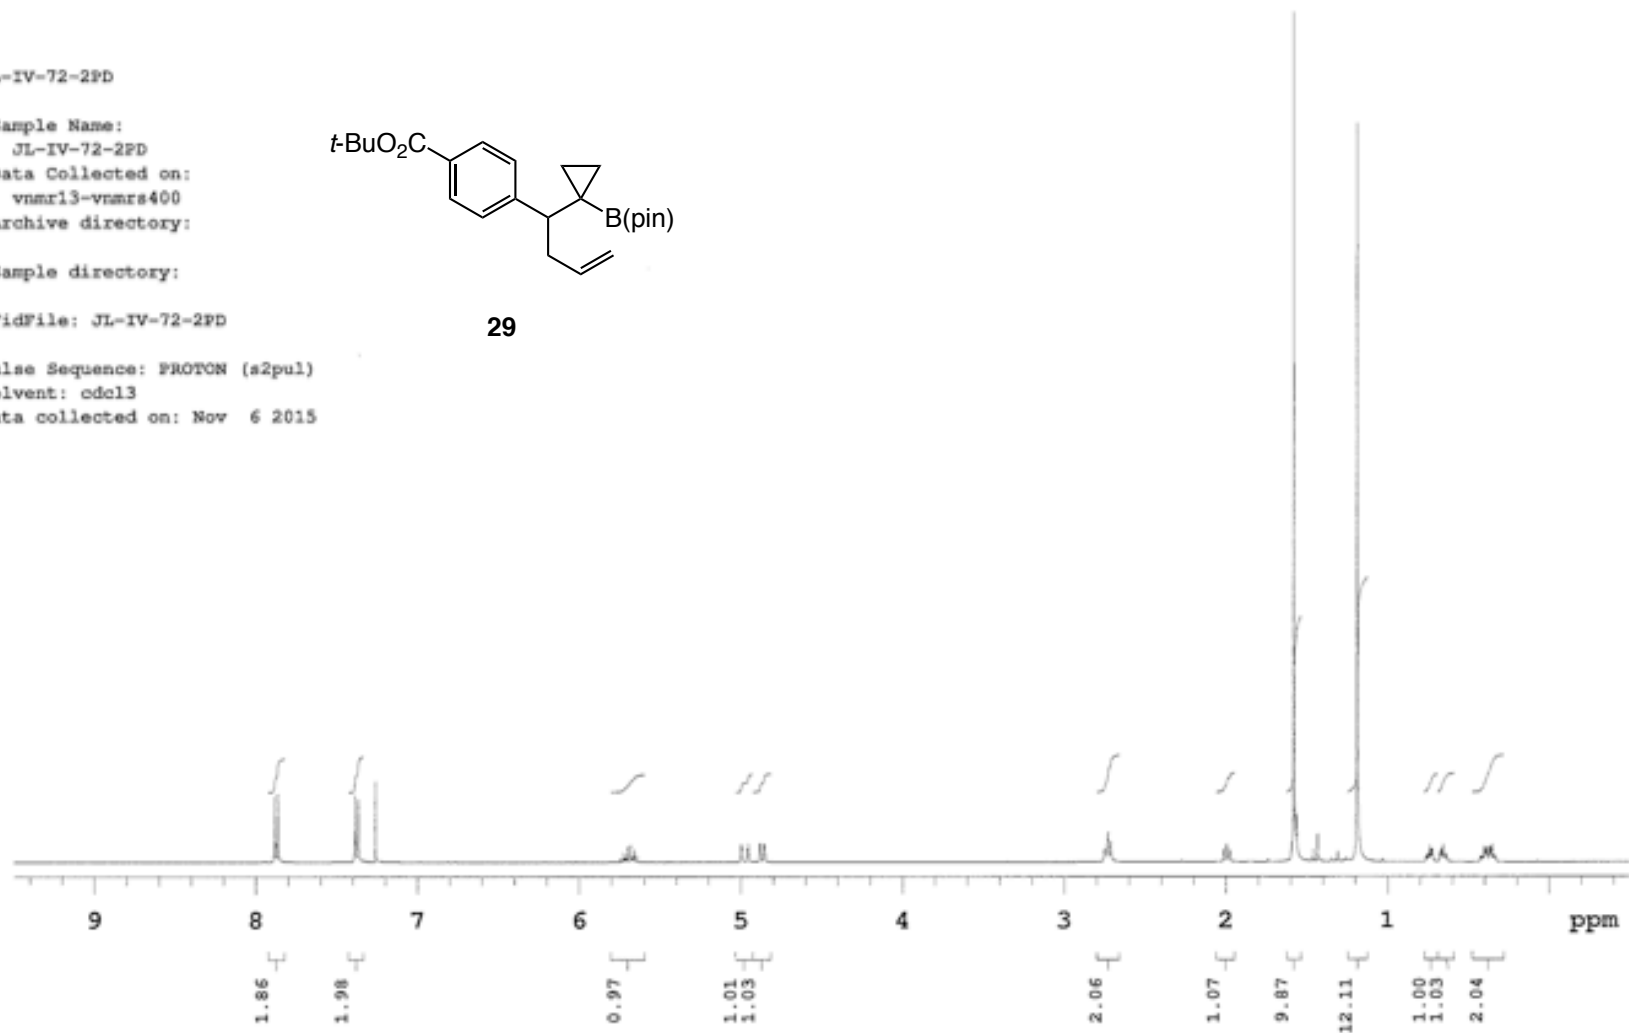



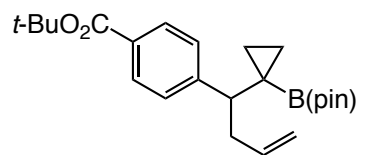

29

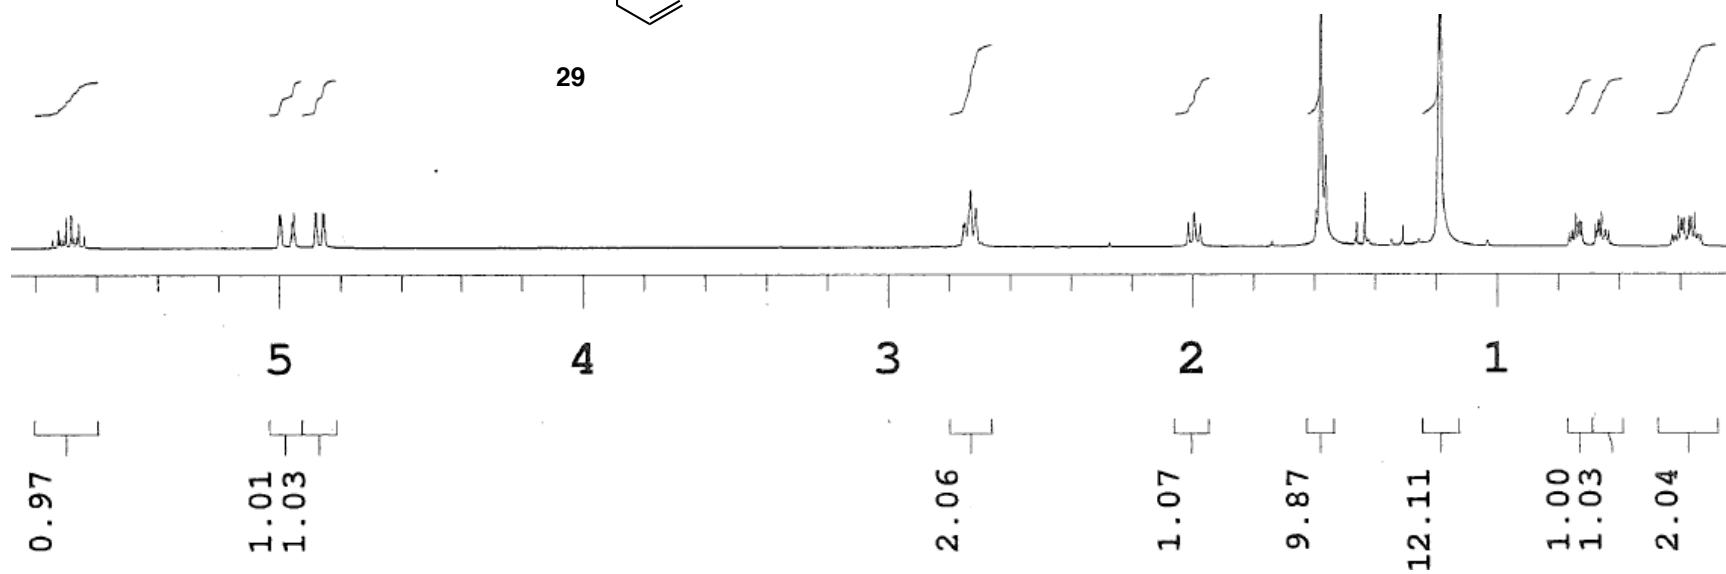

JL-IV-72PD-C

Sample Name:

JL-IV-72PD-C

Data Collected on:

nmr13-vnmrs400

Archive directory:

Sample directory:

FidFile: CARBON

Pulse Sequence: CARBON (s2pul)

Solvent: cdcl3

Data collected on: Nov 12 2015

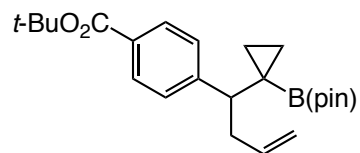

29

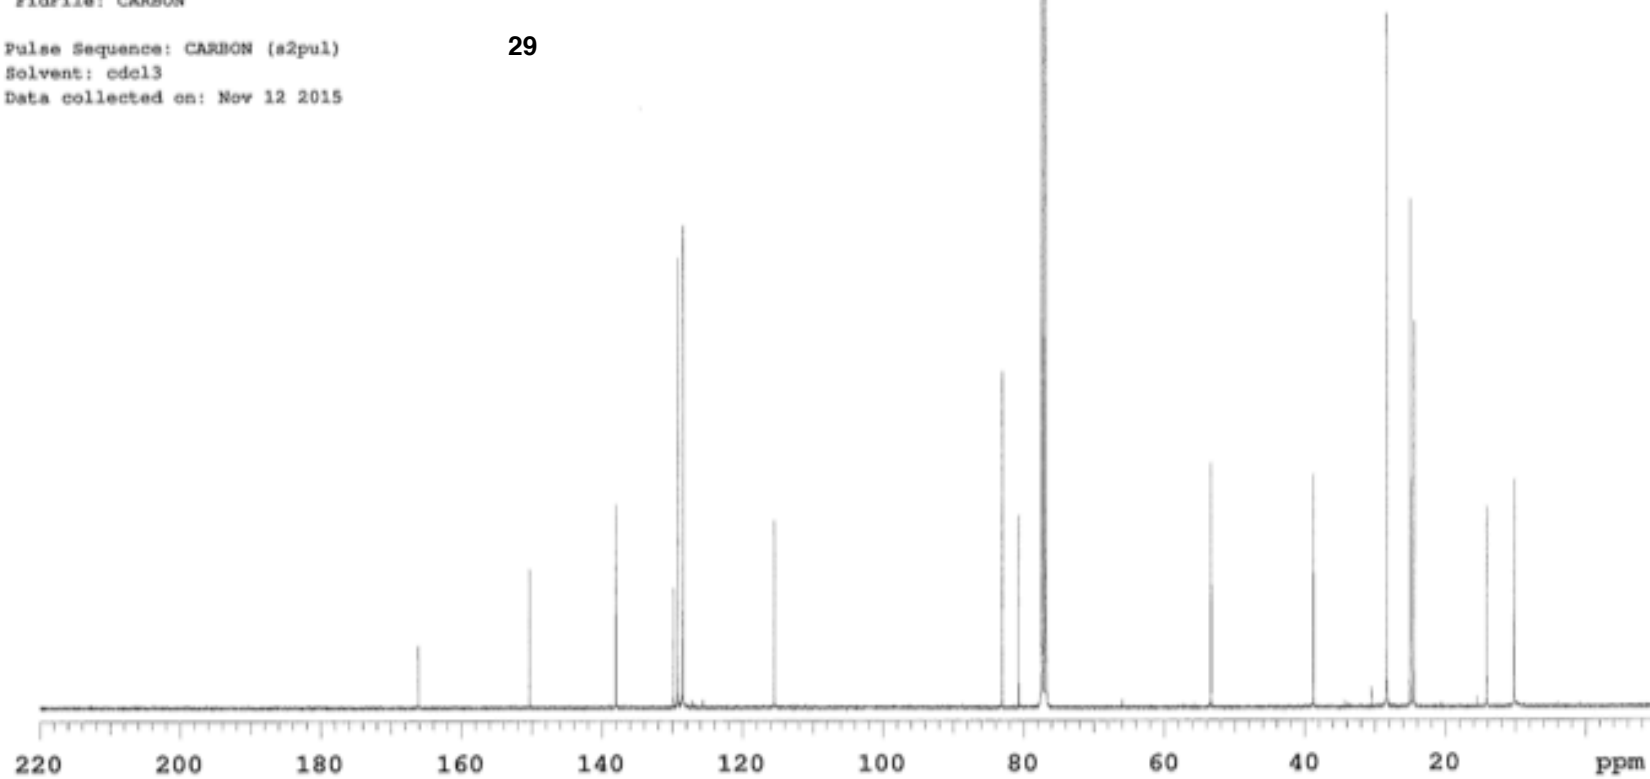

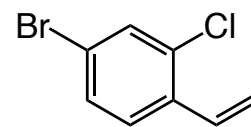

**32**

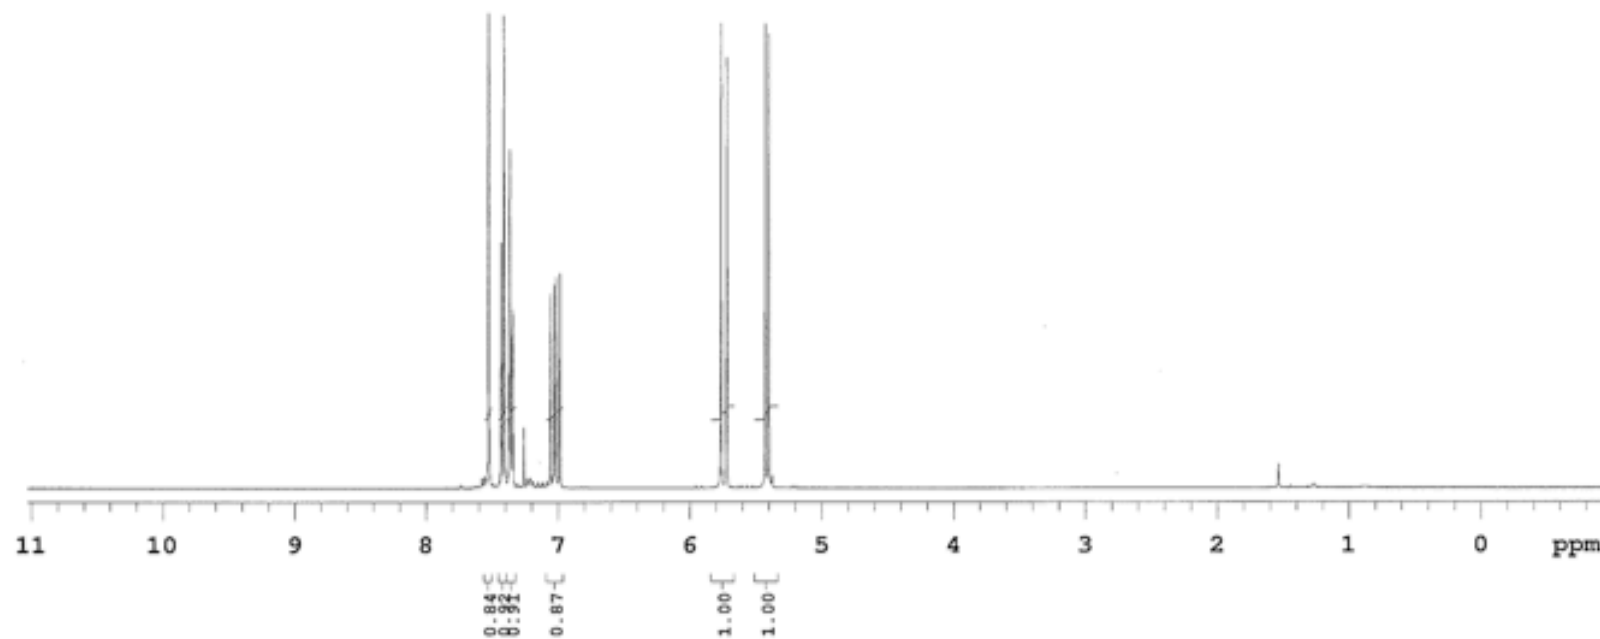

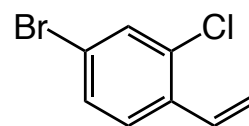

**32**

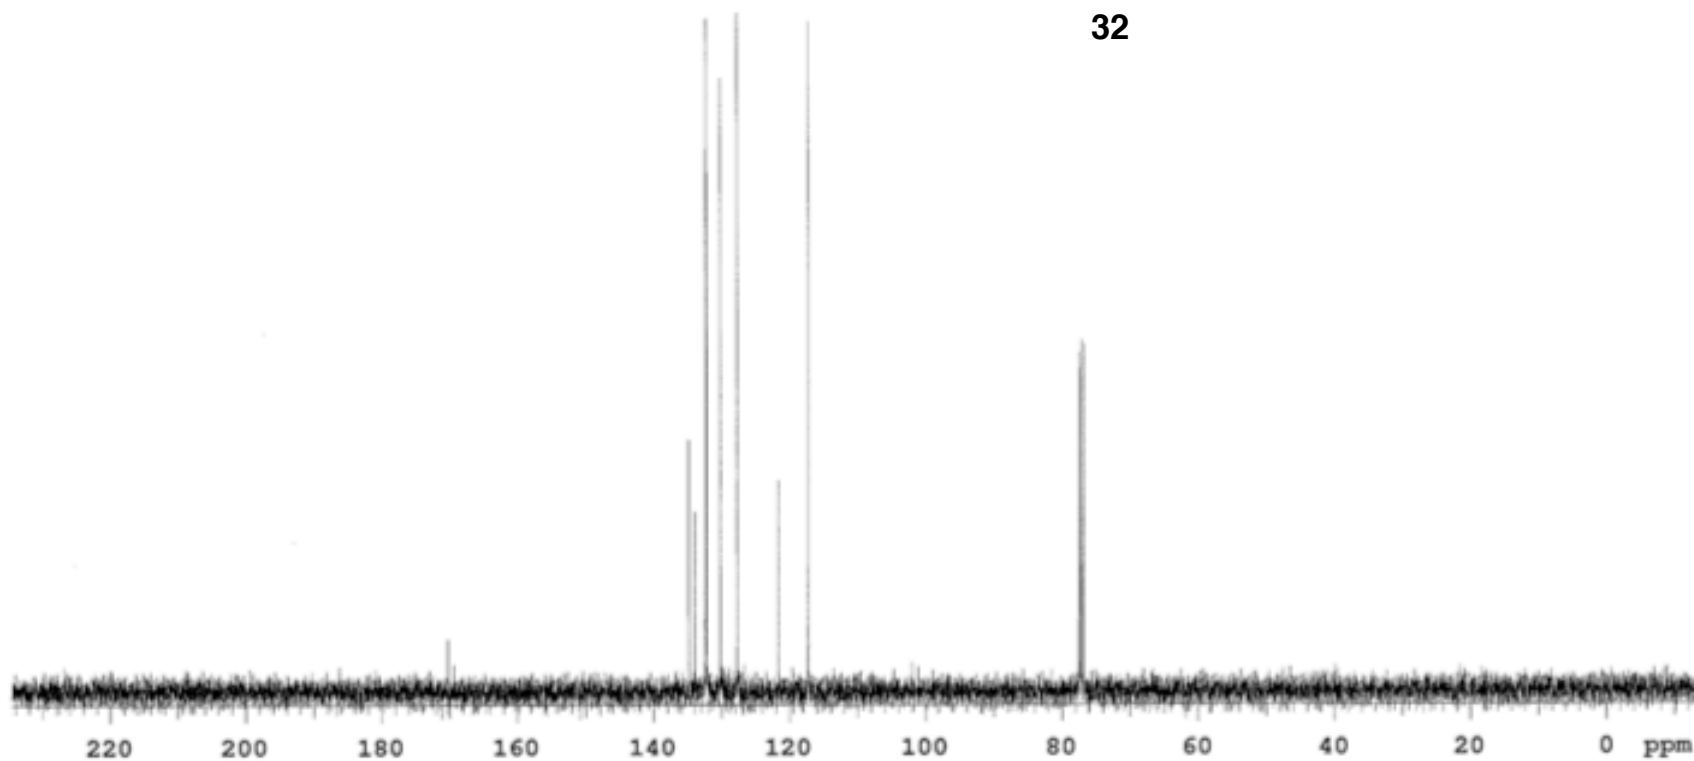

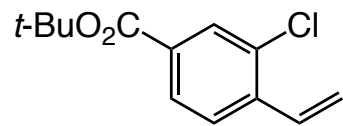

**33**

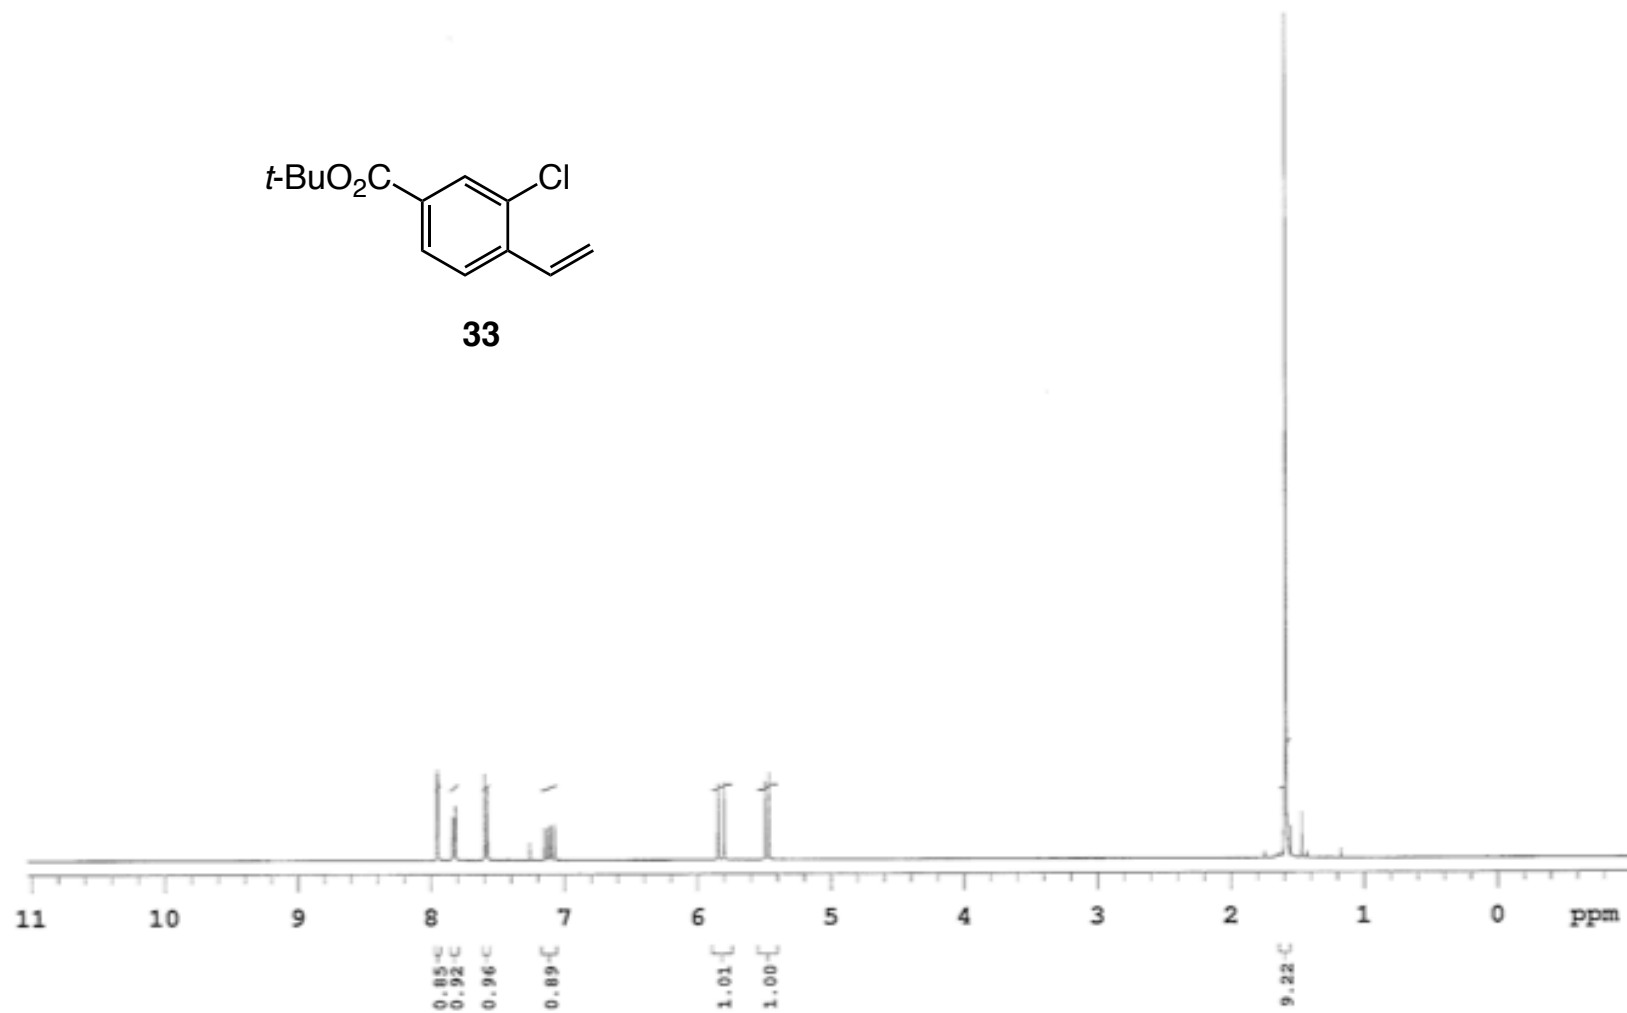

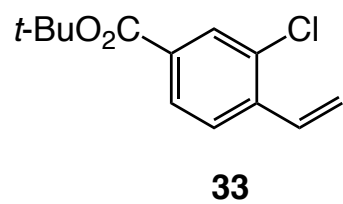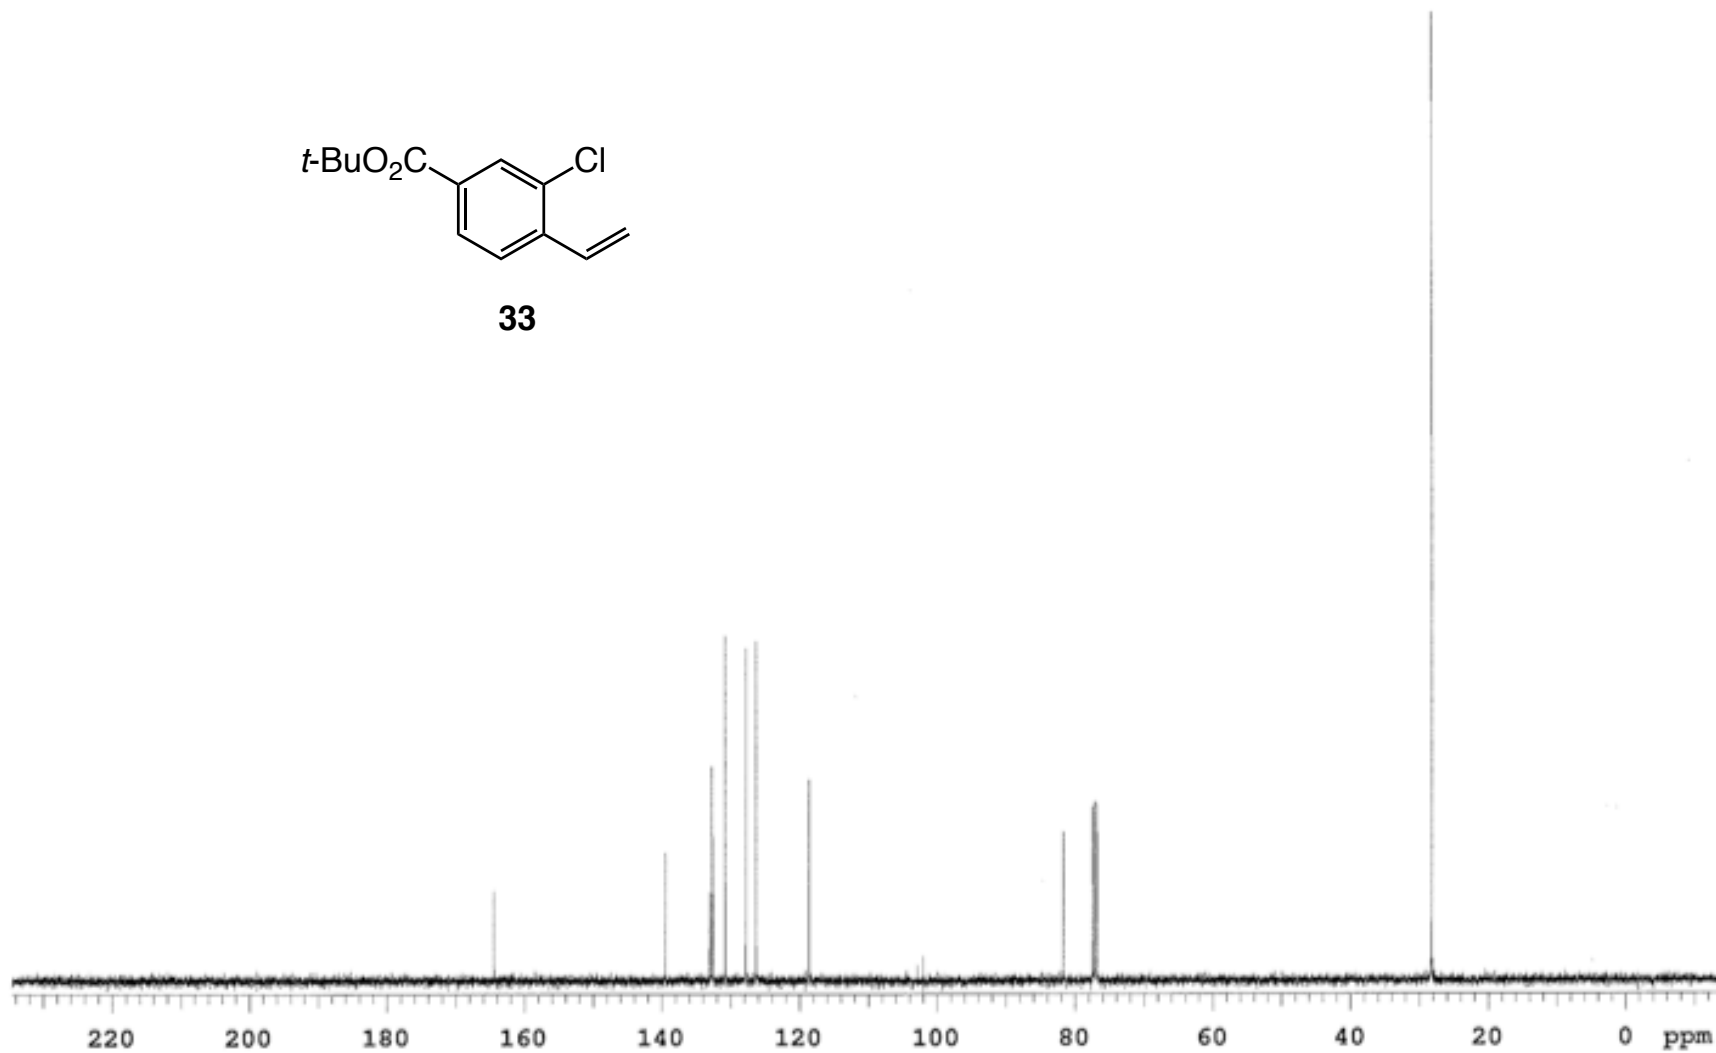

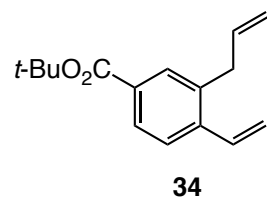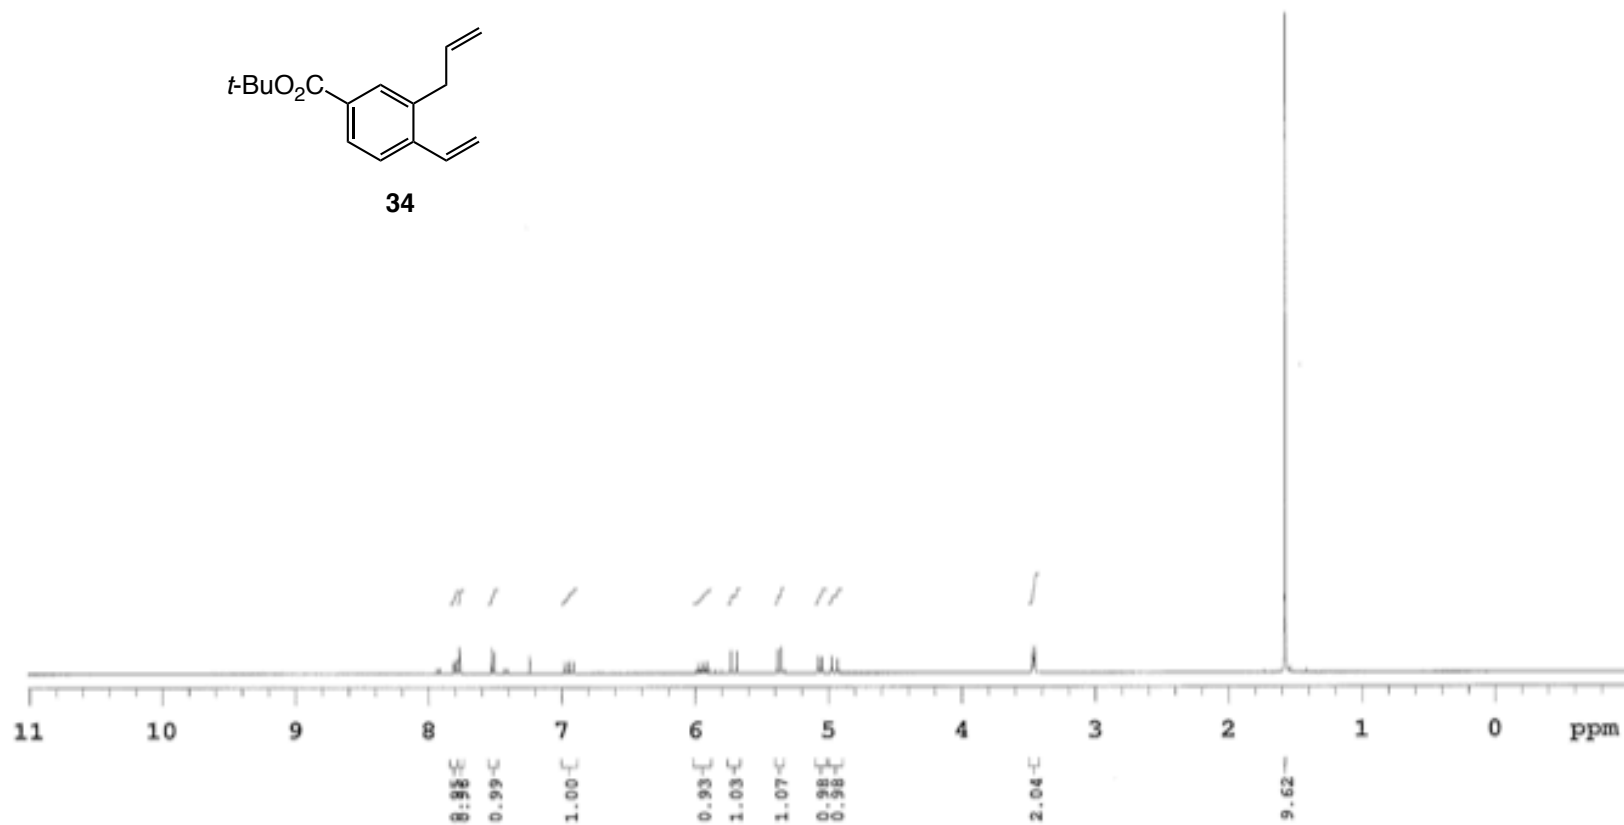

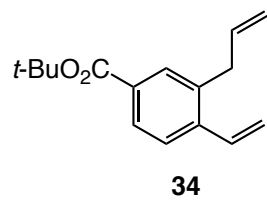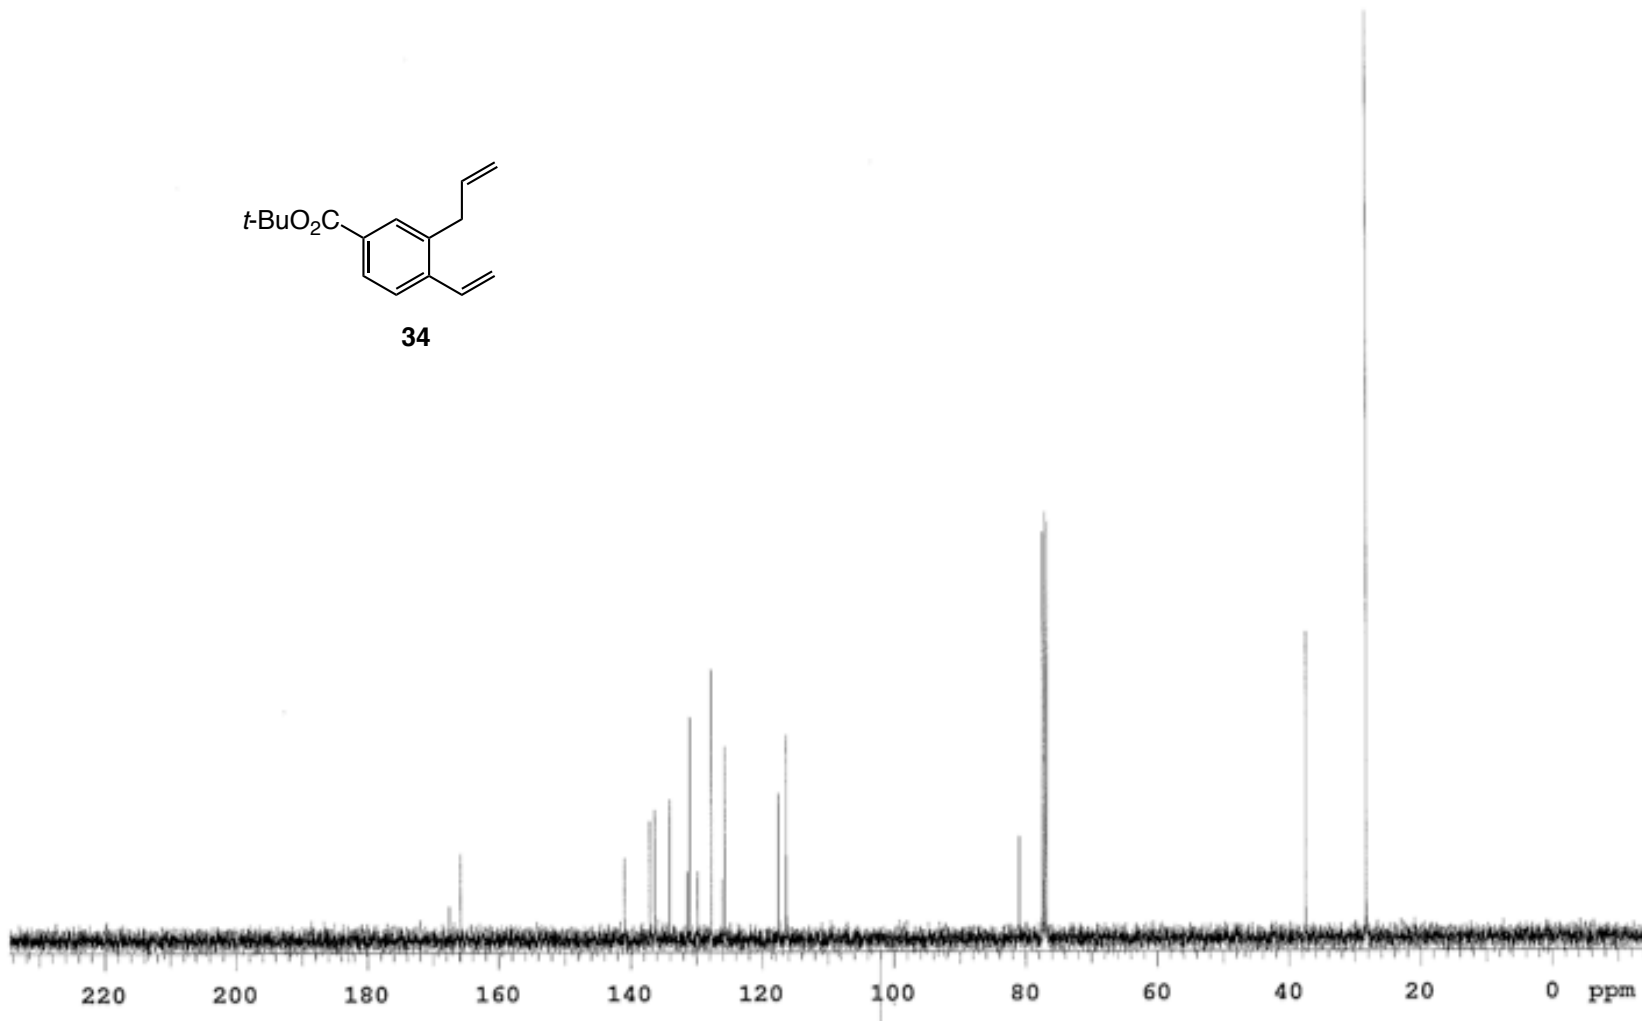



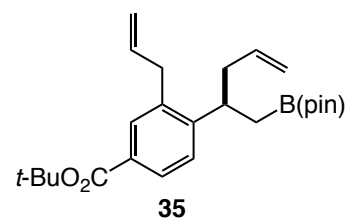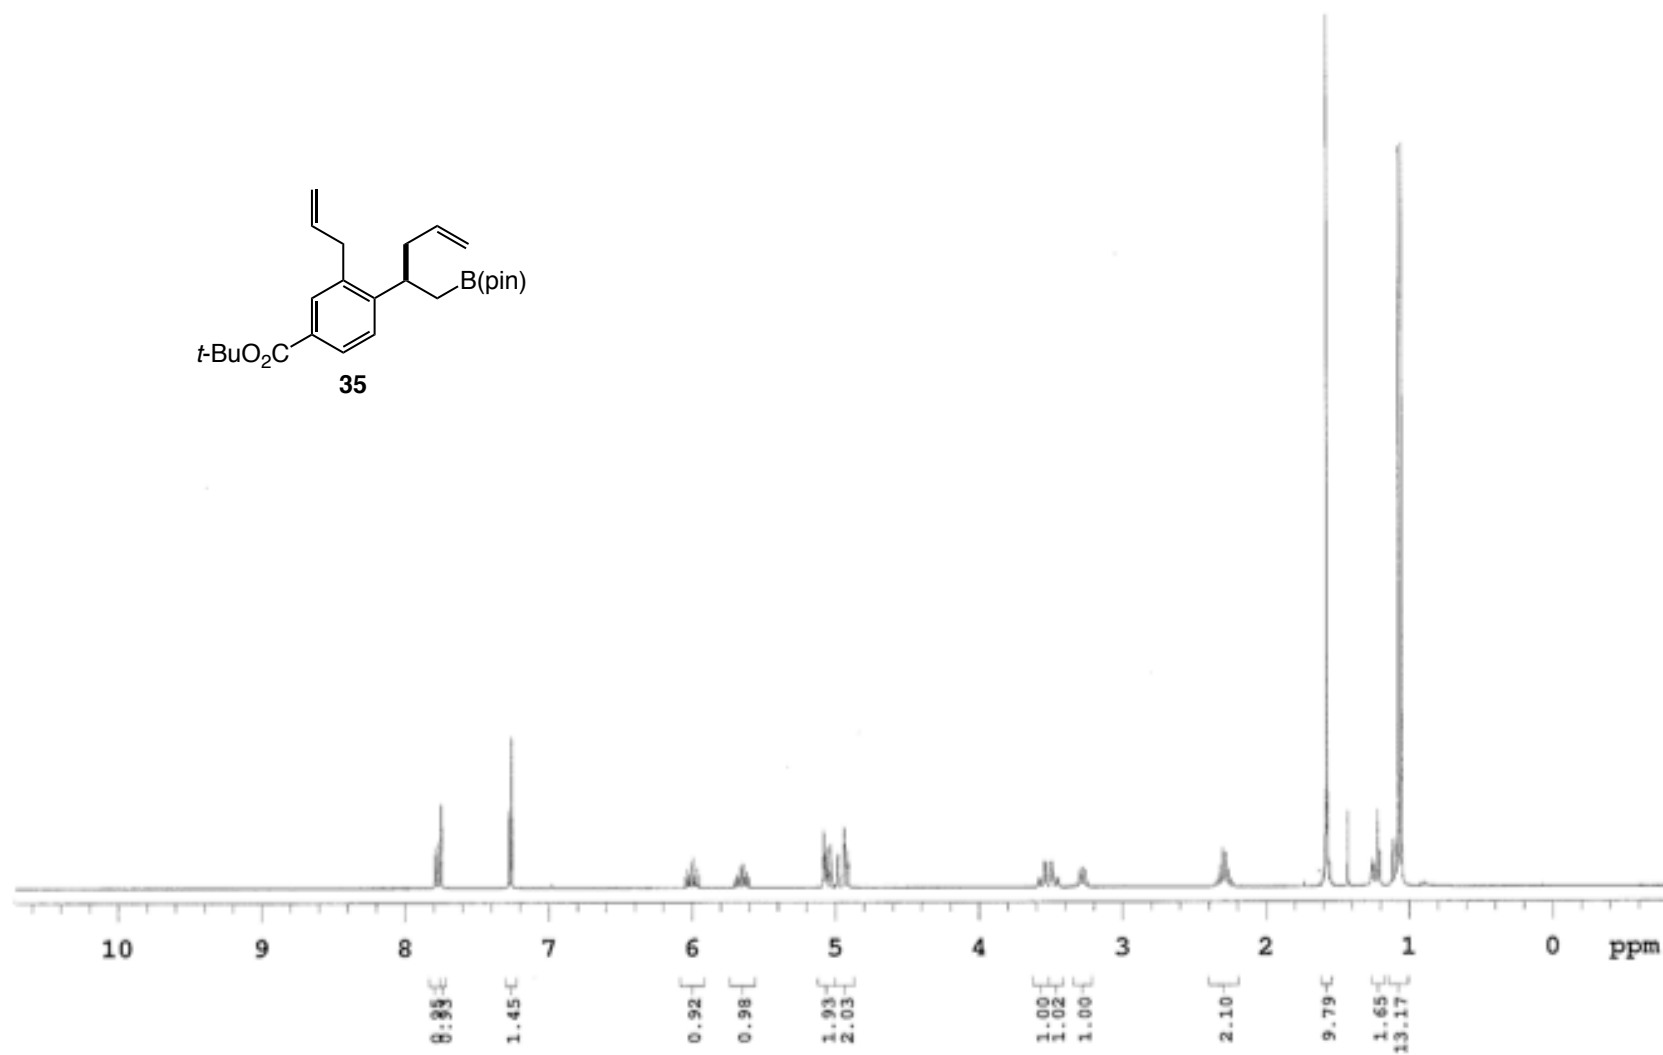

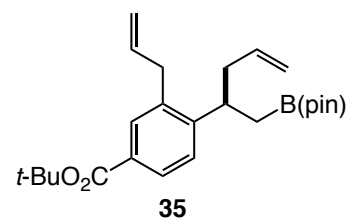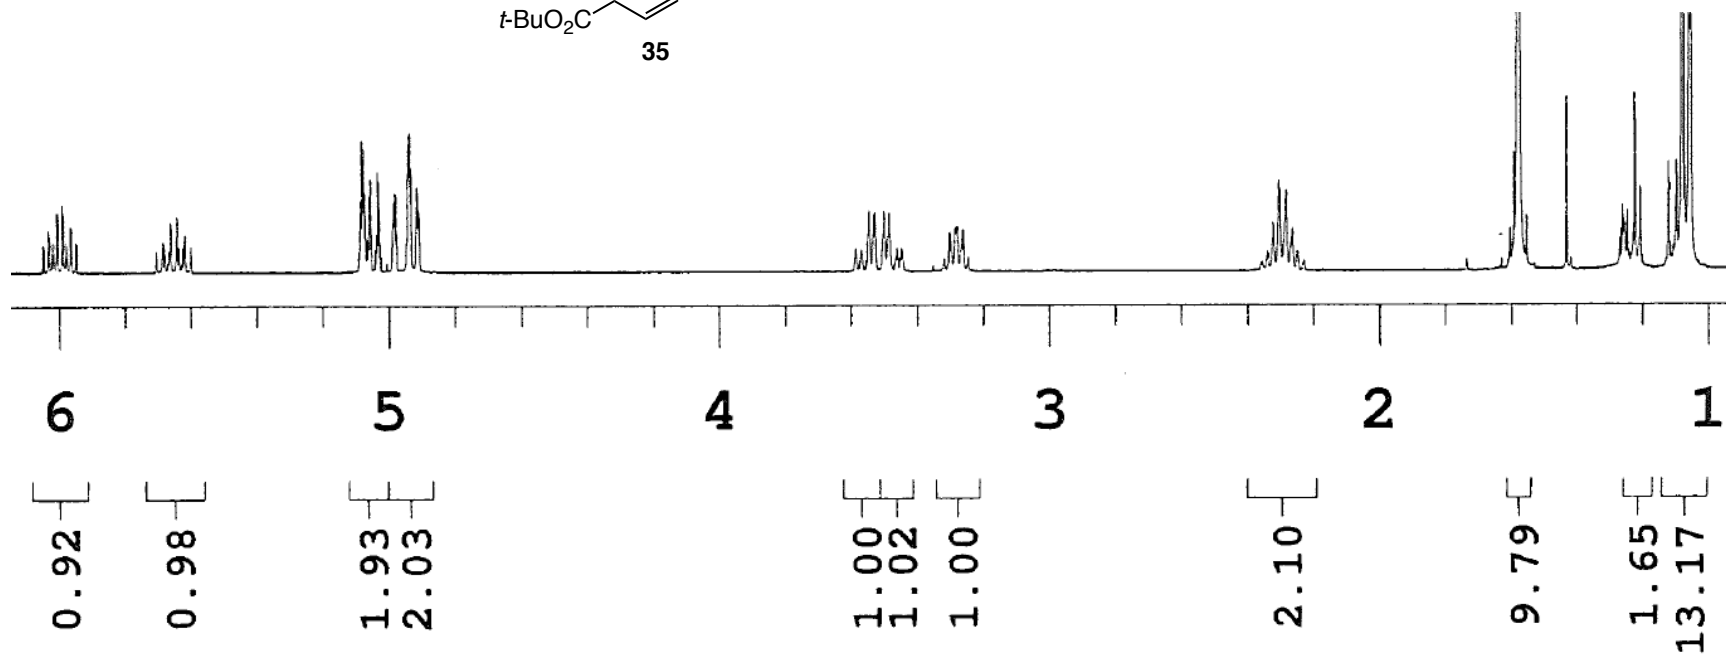

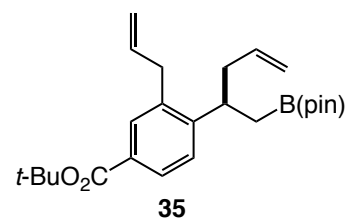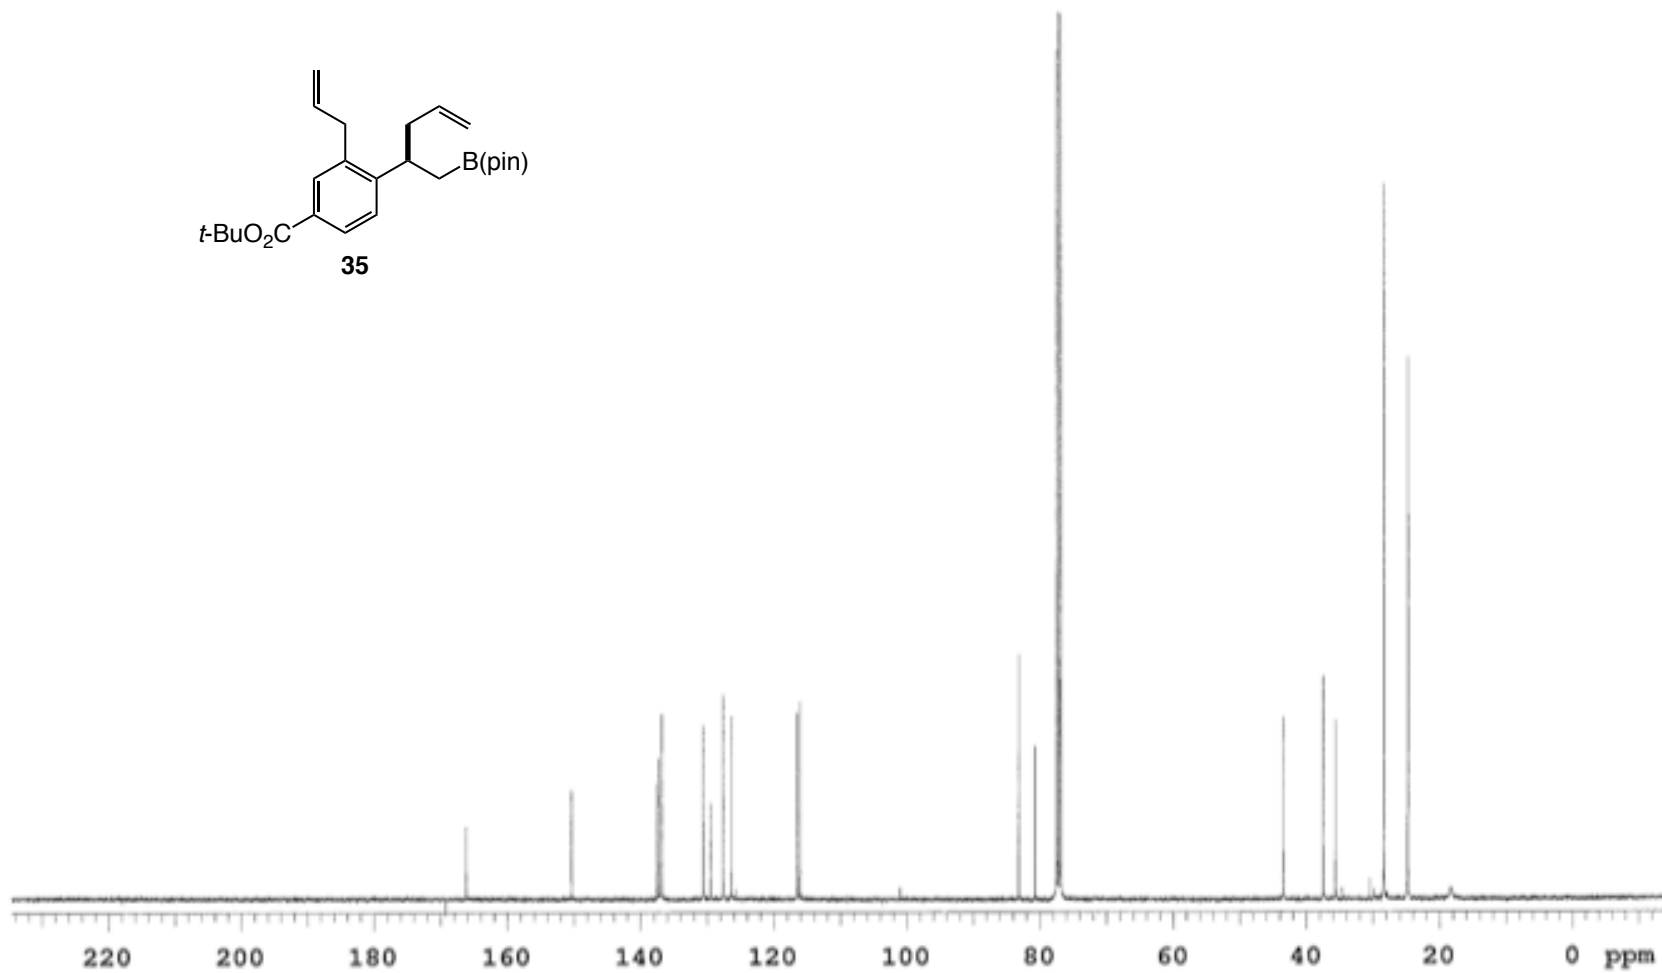

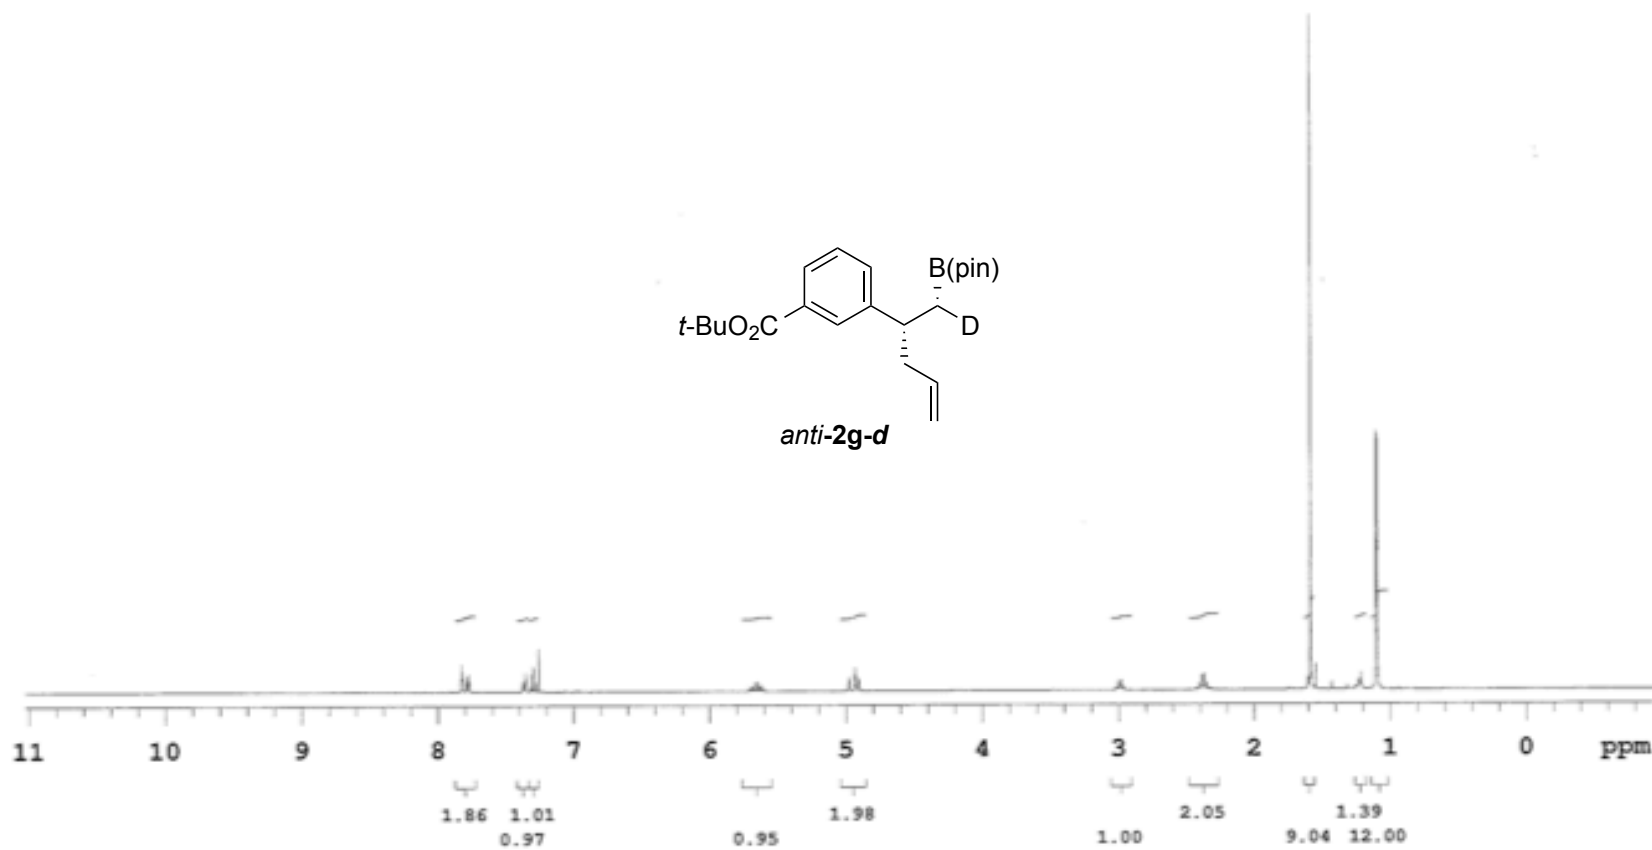

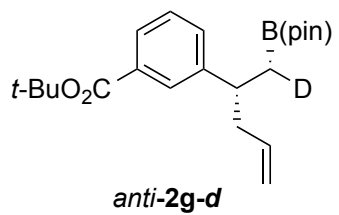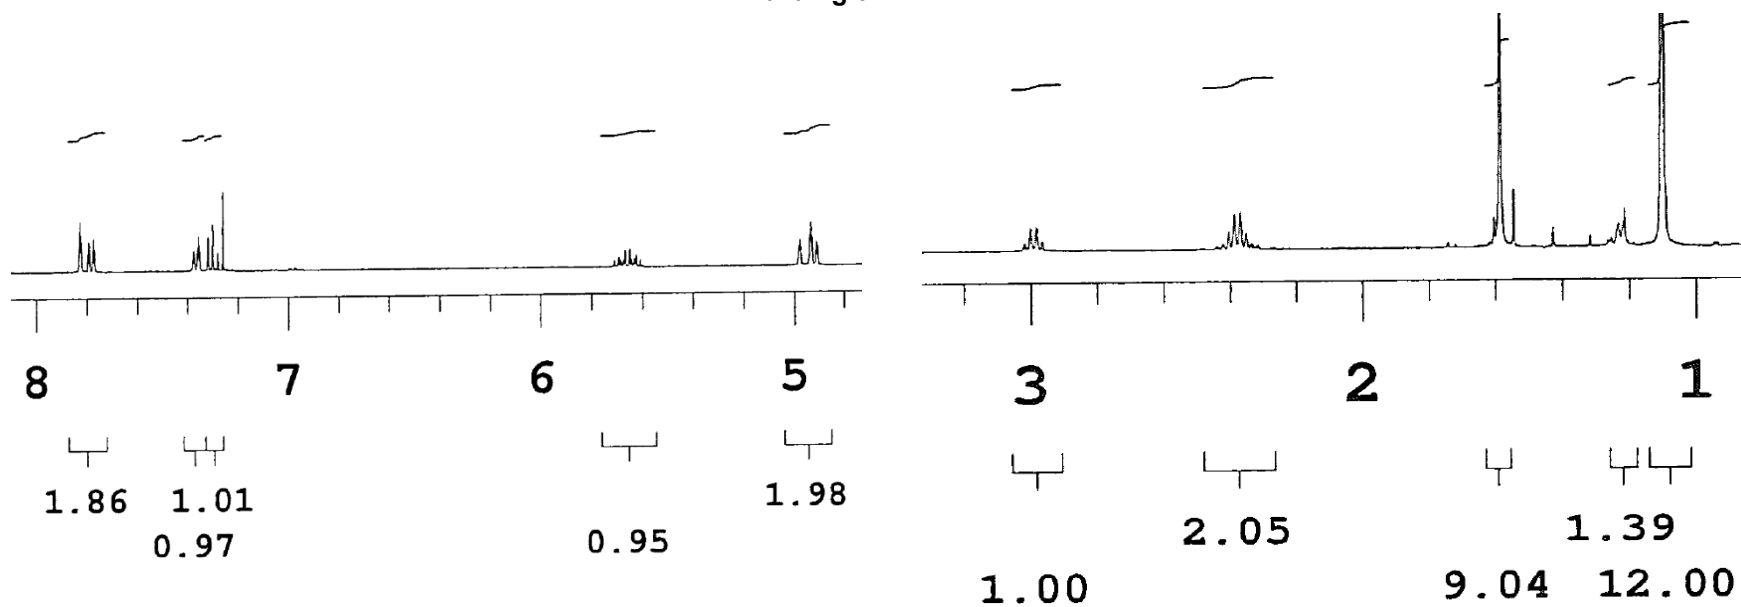

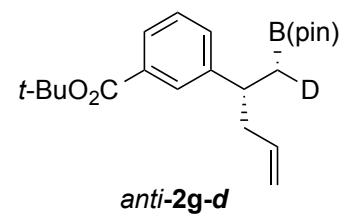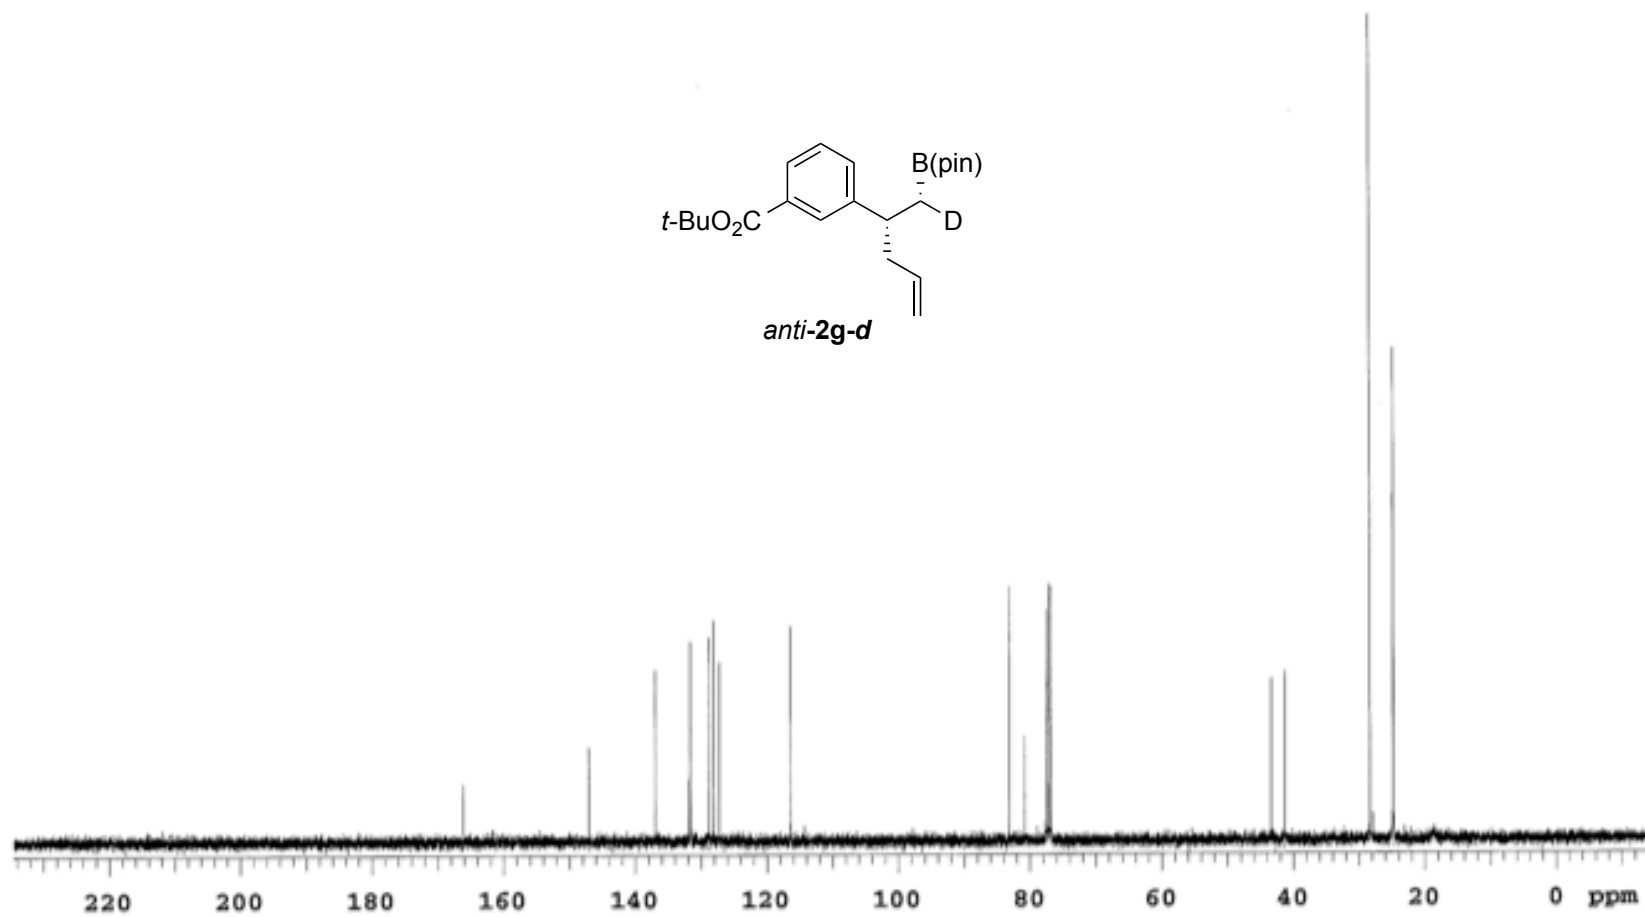

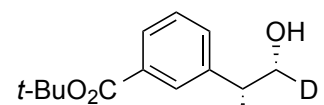

oxidation product of *anti*-2g-d  
>98:2 d.r.

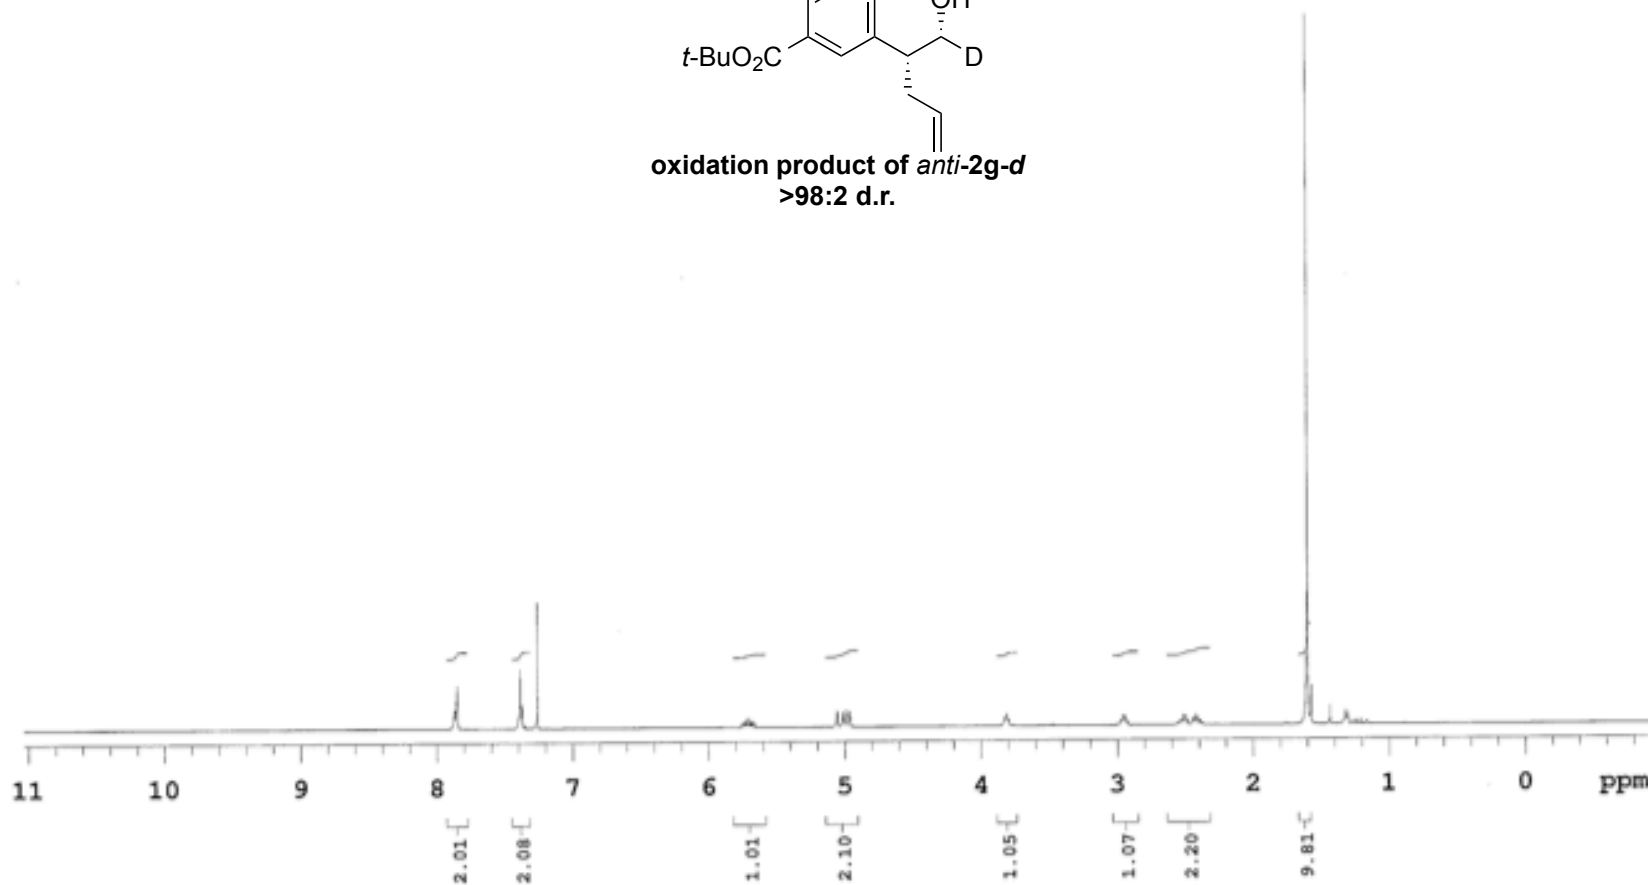

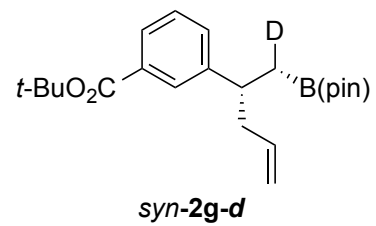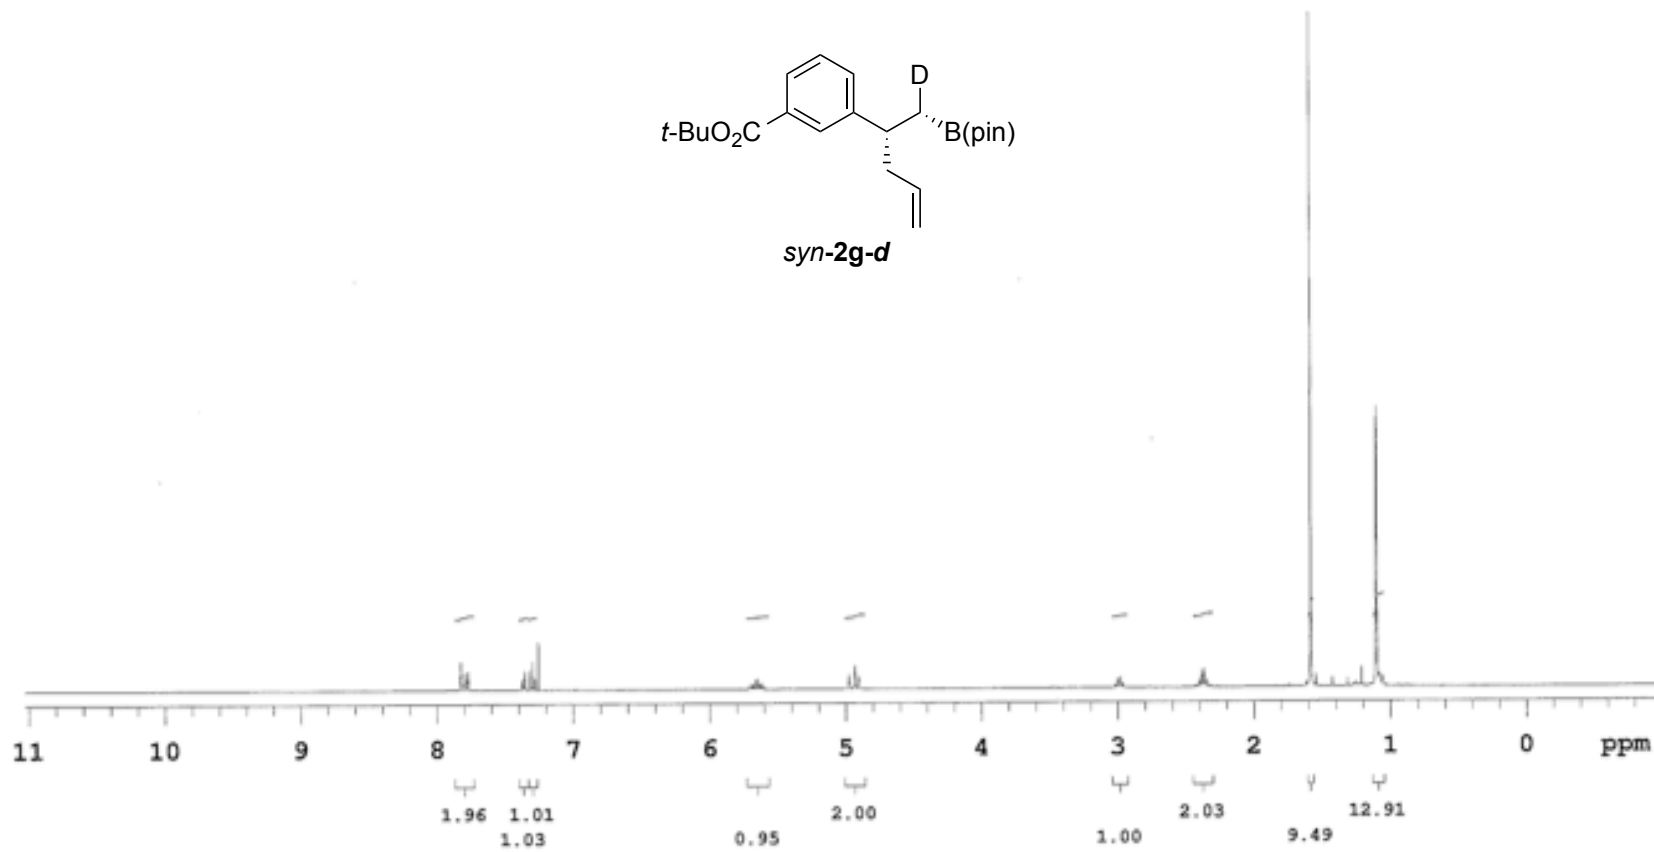



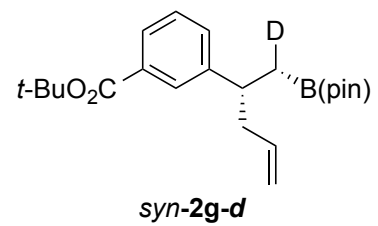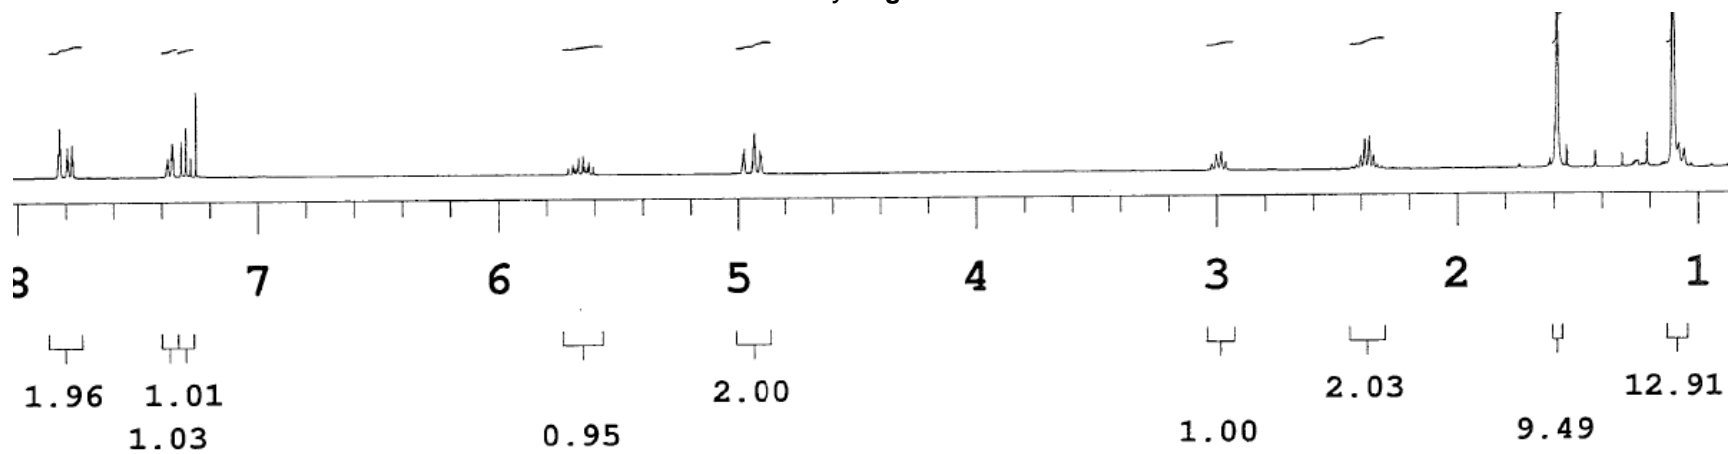

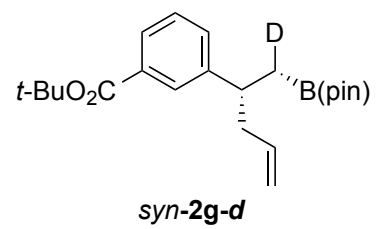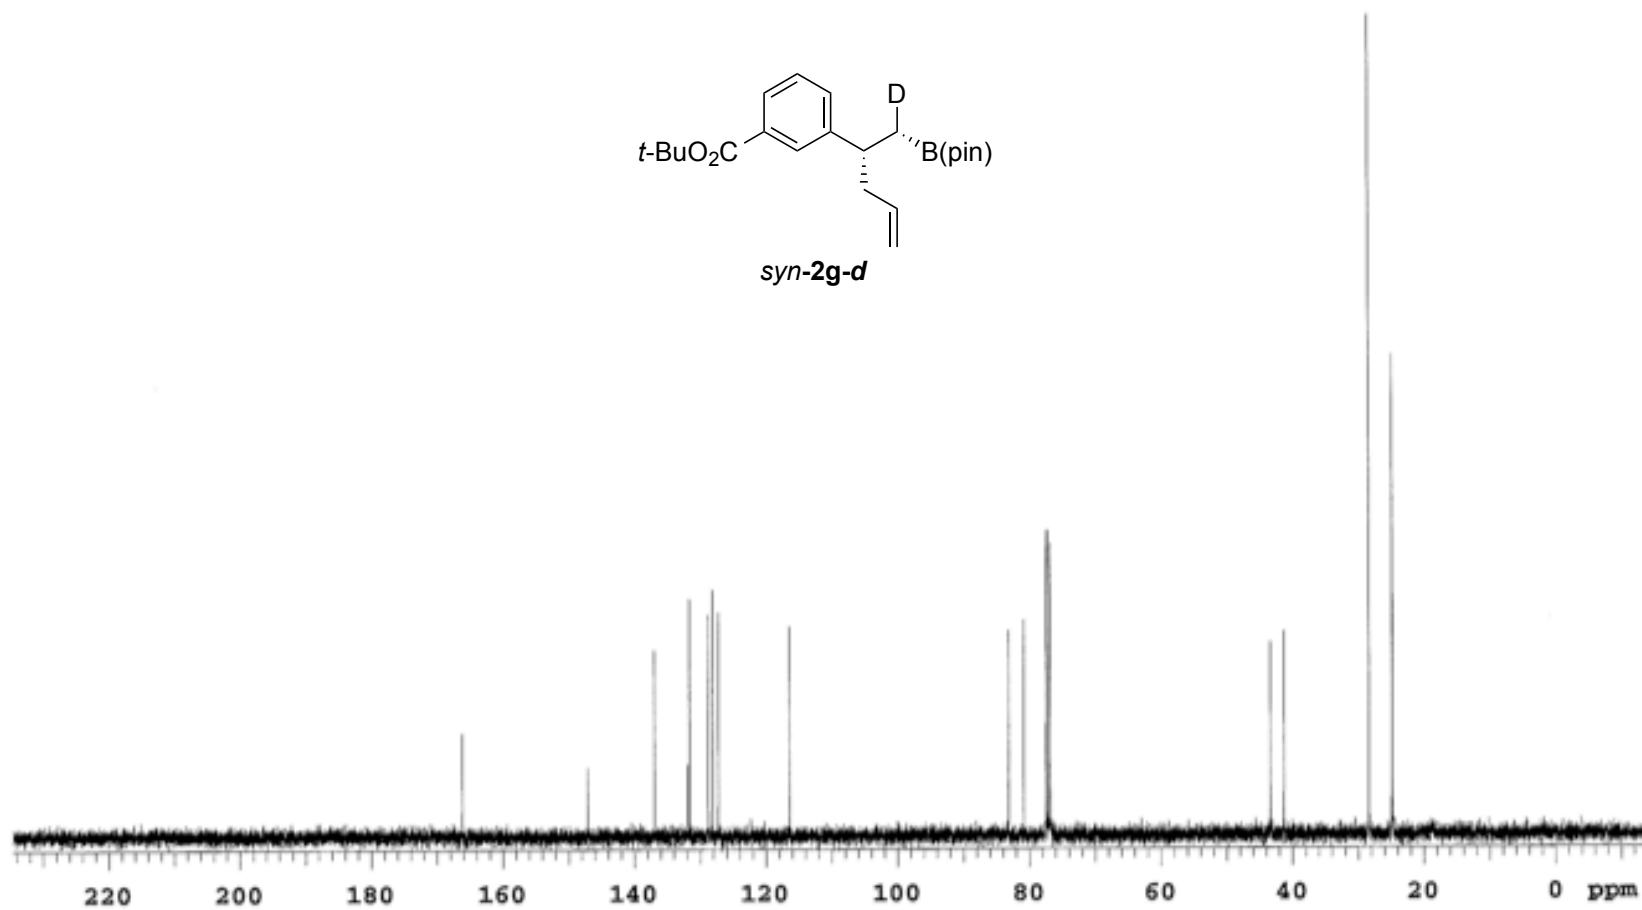

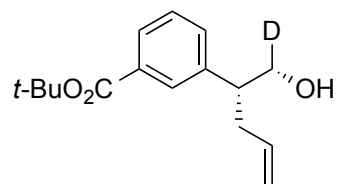

oxidation product of *syn*-2g-d  
89:11 d.r.  
(from 90:10 Z:E S4)

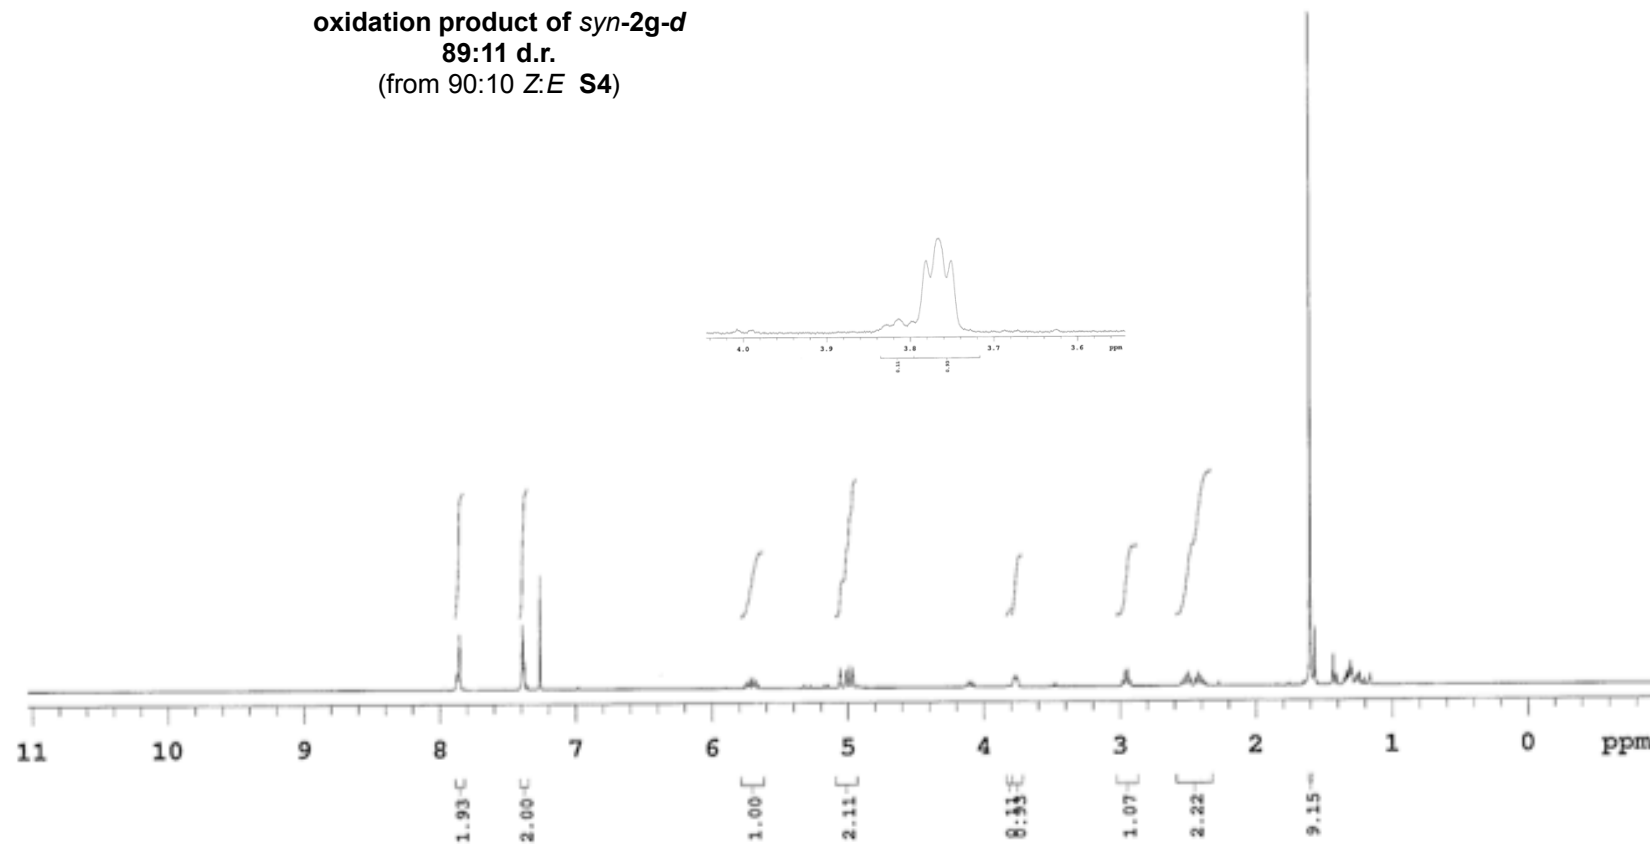

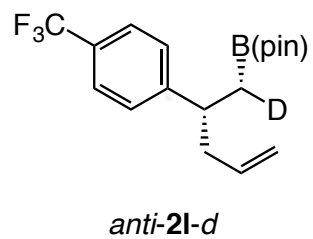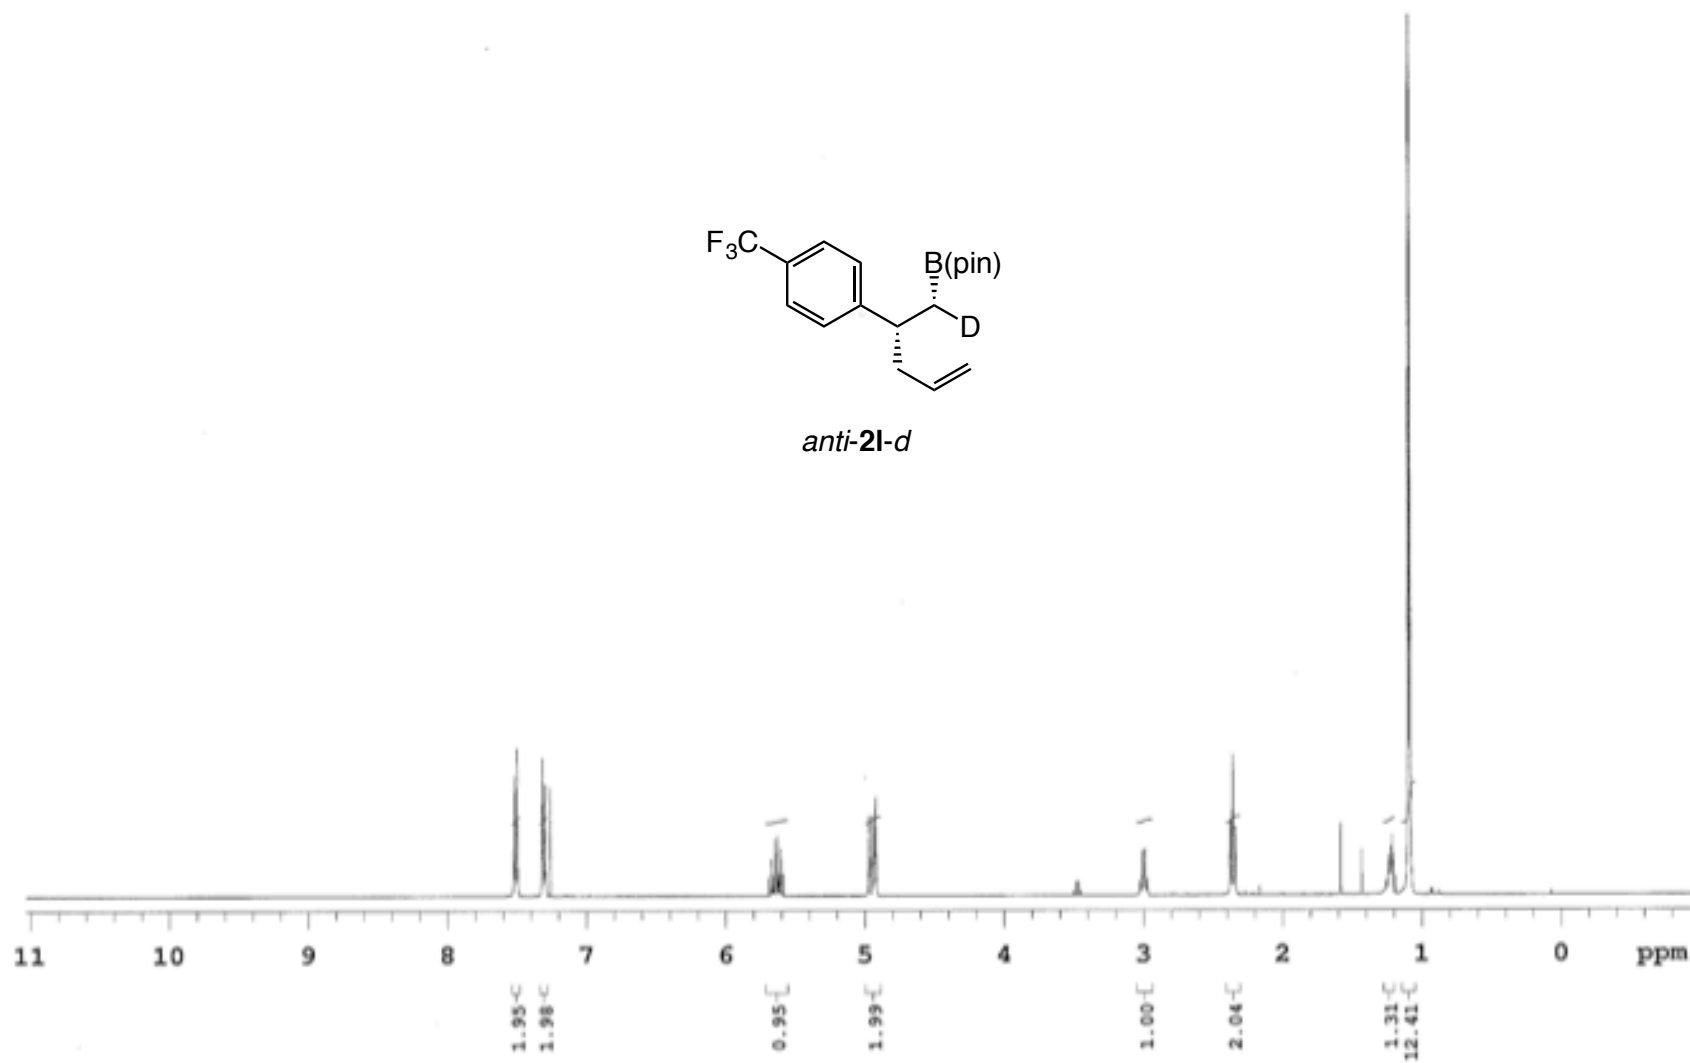

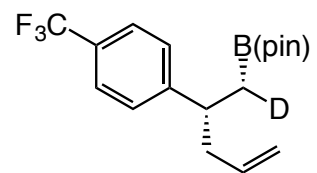

*anti-2I-d*

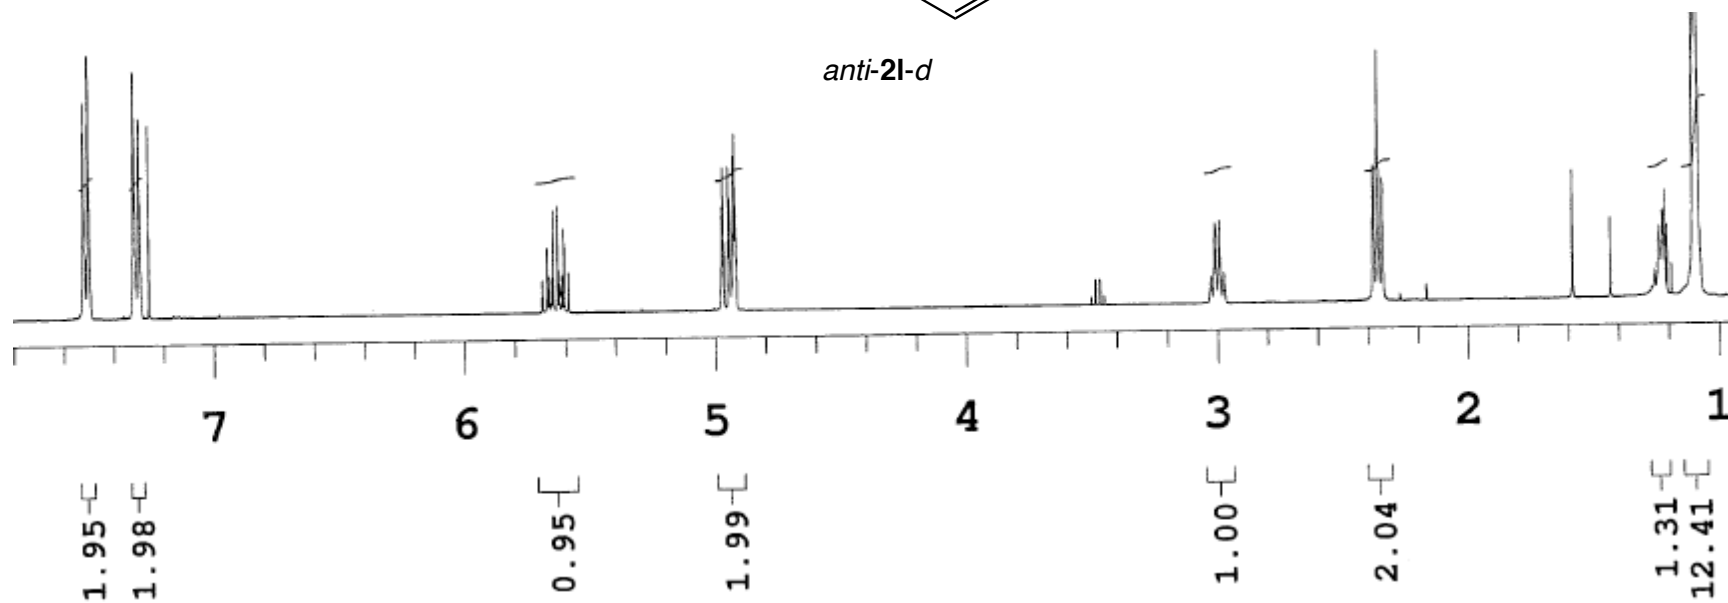

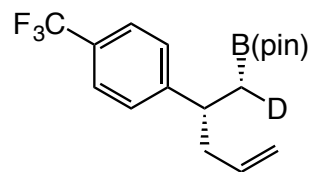

*anti-21-d*

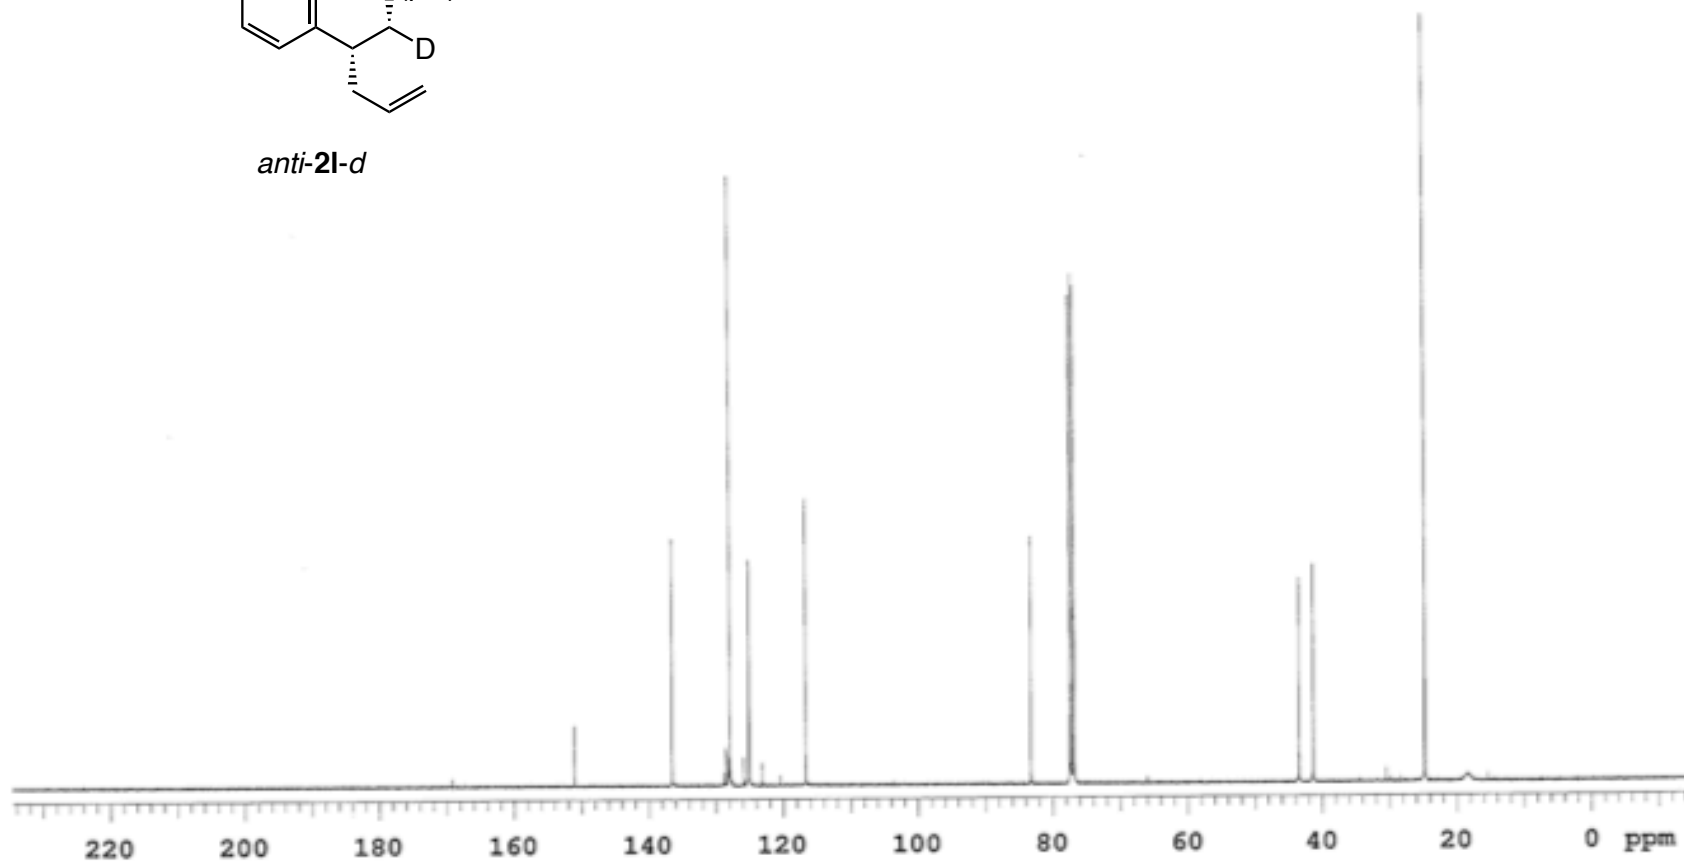

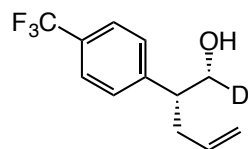

**oxidation product of anti-2I-d**  
92:8 d.r.  
(from 91:9 E:Z alkene)

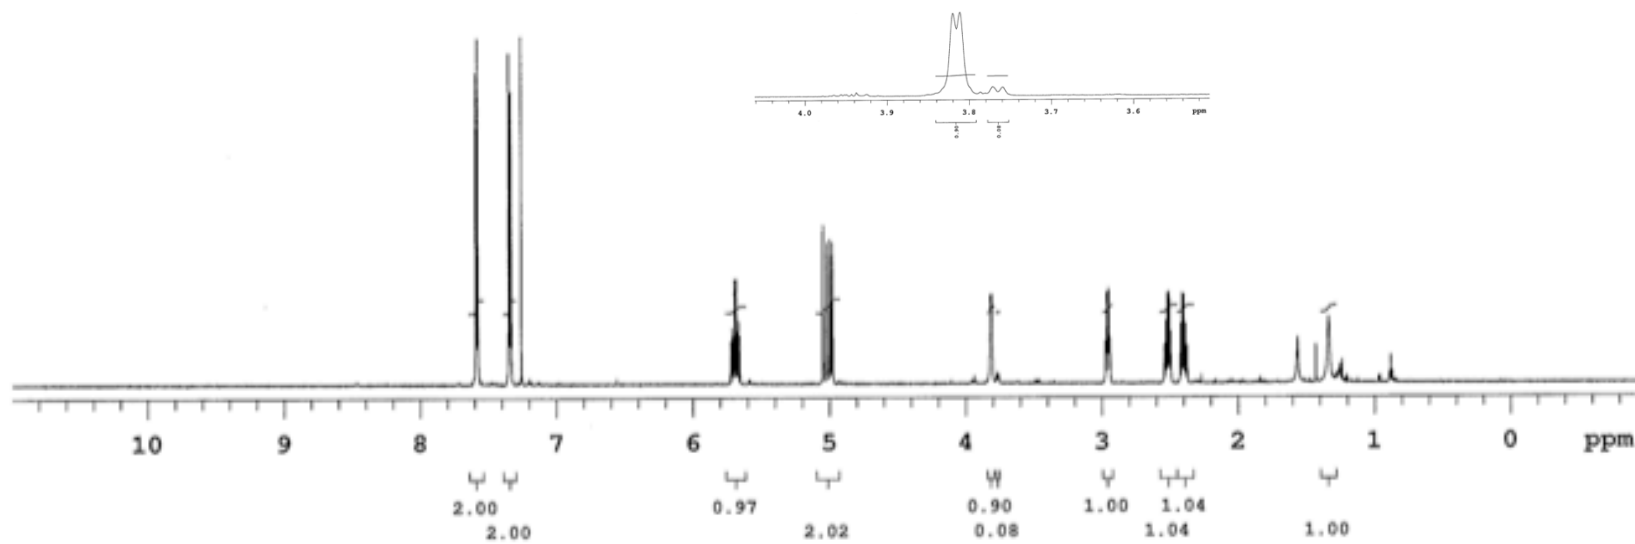

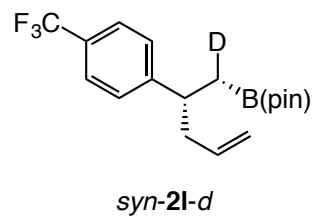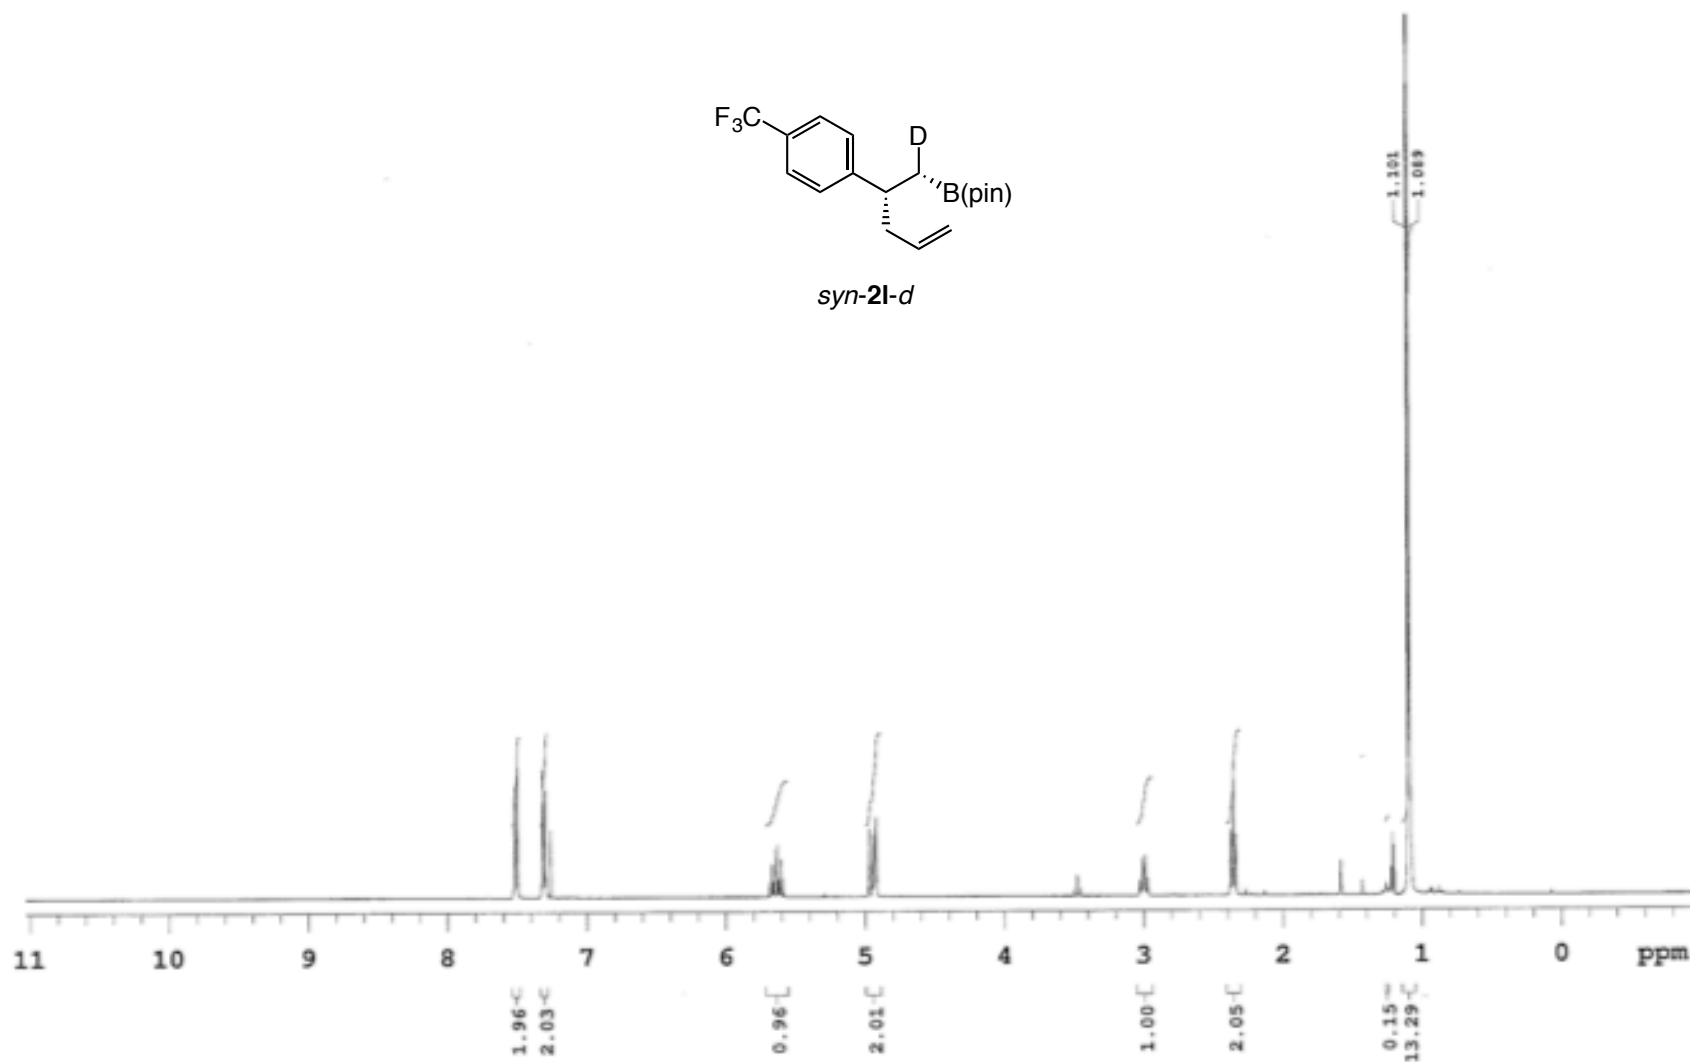



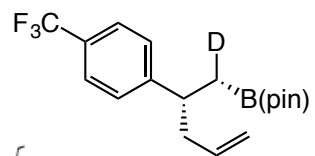

*syn-21-d*

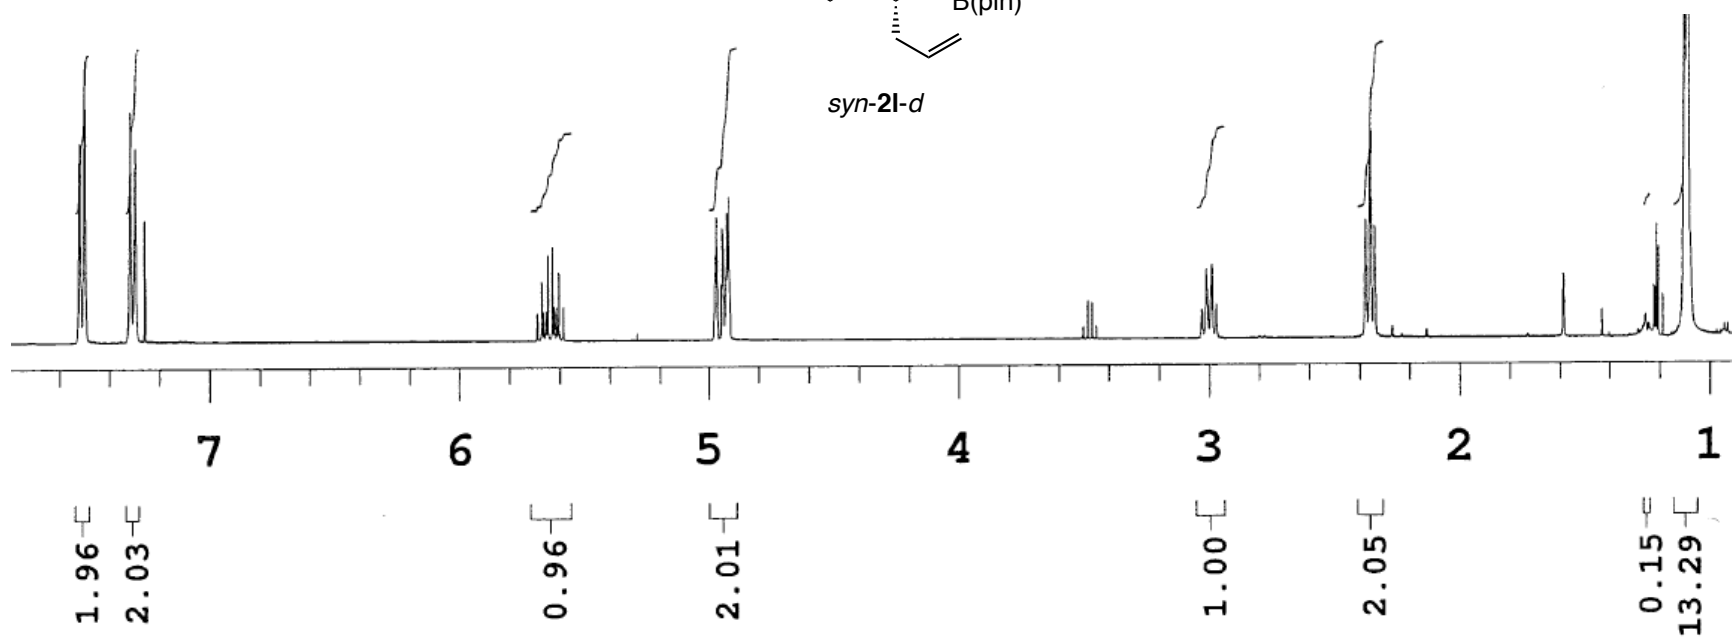

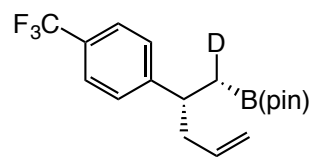

*syn-2I-d*

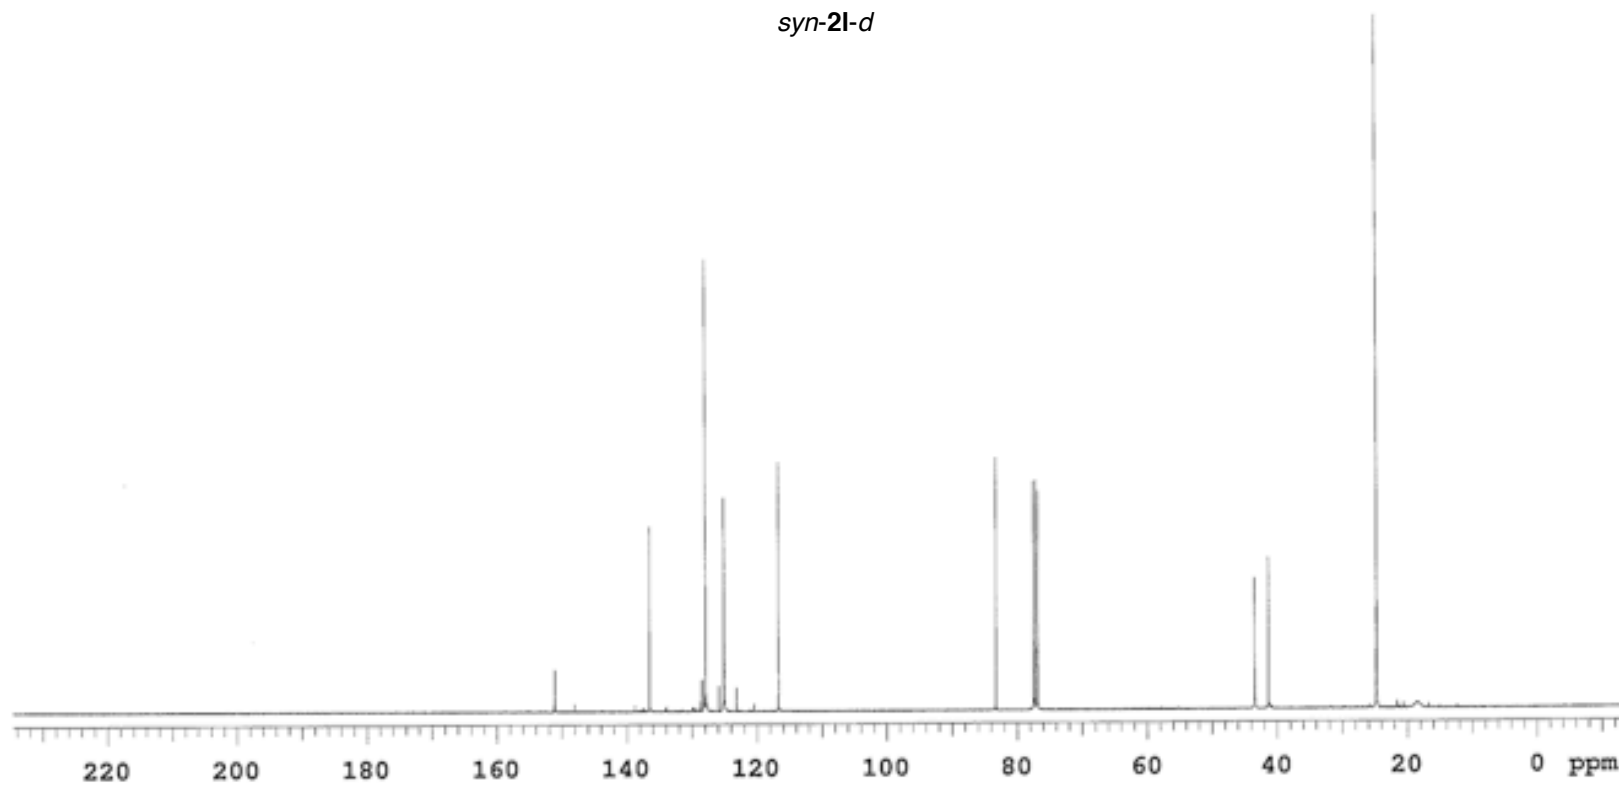

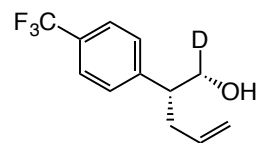

**oxidation product of *syn*-2l-d**  
*92:8 d.r.*  
(from 90:10 *Z:E* alkene)

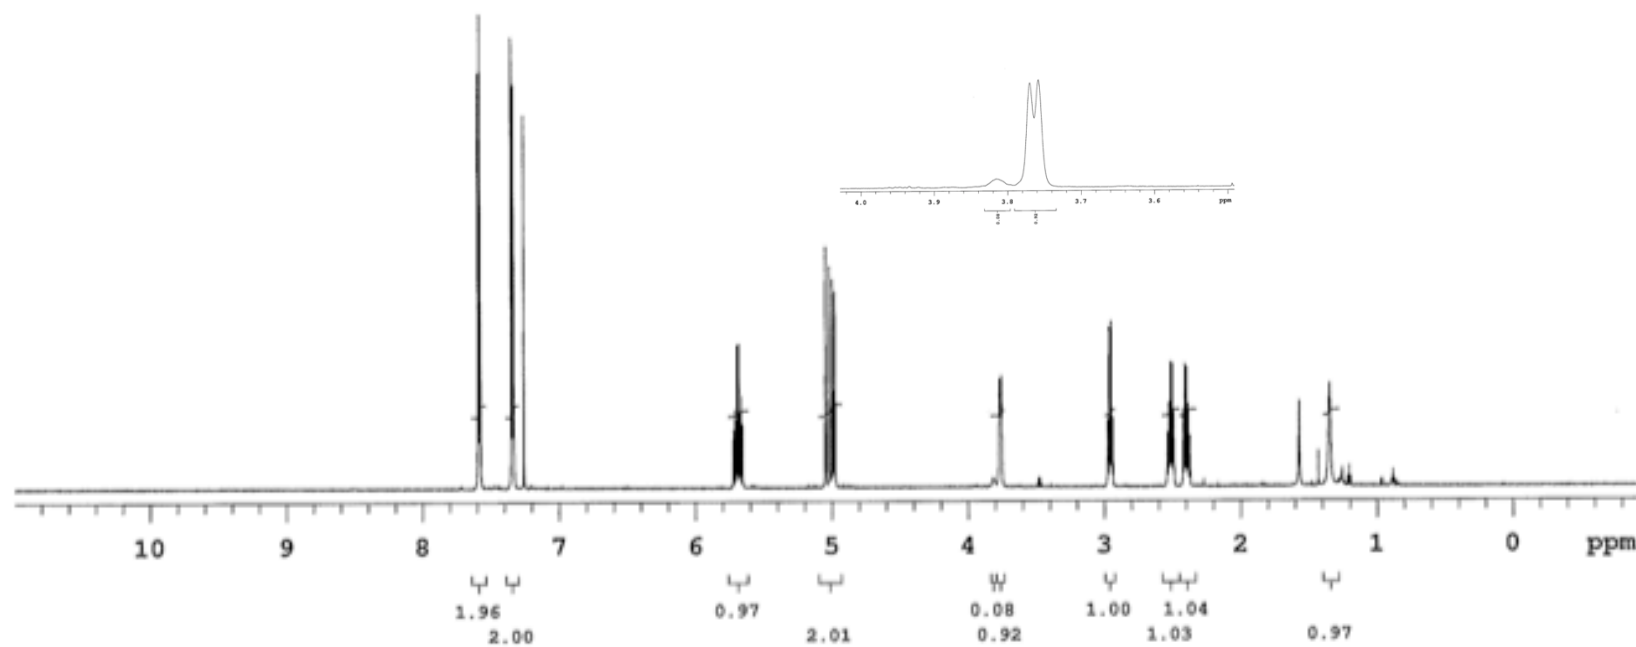

JL-III-251PD

Sample Name:  
JL-III-251PD  
Data Collected on:  
nmr19-vners638  
Archive directory:

Sample directory:

FidFile: PROTON

Pulse Sequence: PROTON (s2pul)  
Solvent: cdcl3  
Data collected on: Jul 15 2015

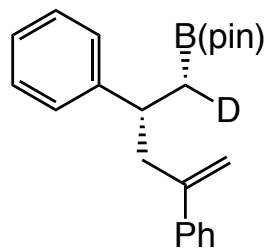

*anti-2n-d*  
>98:2 d.r.  
(from >98:2 *E:Z* alkene)

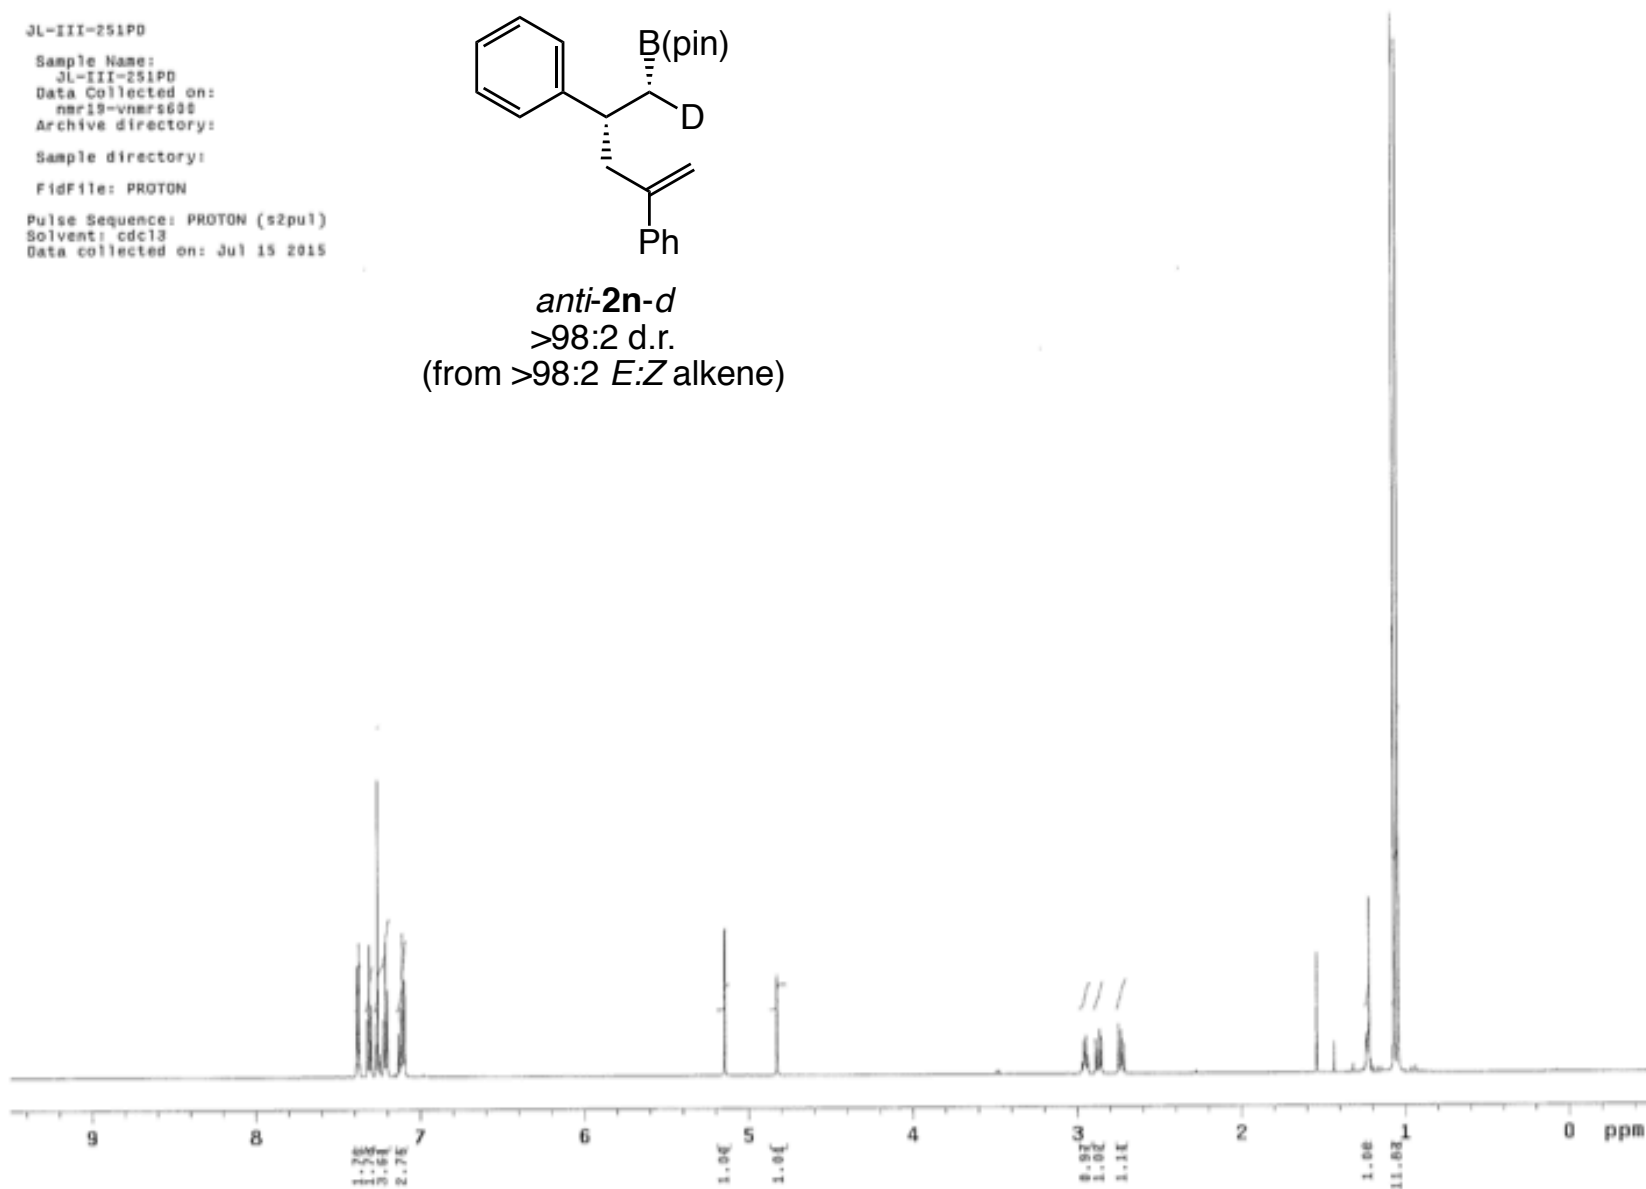

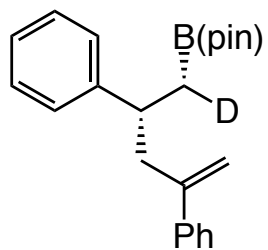

*anti-2n-d*  
>98:2 d.r.  
(from >98:2 *E:Z* alkene)

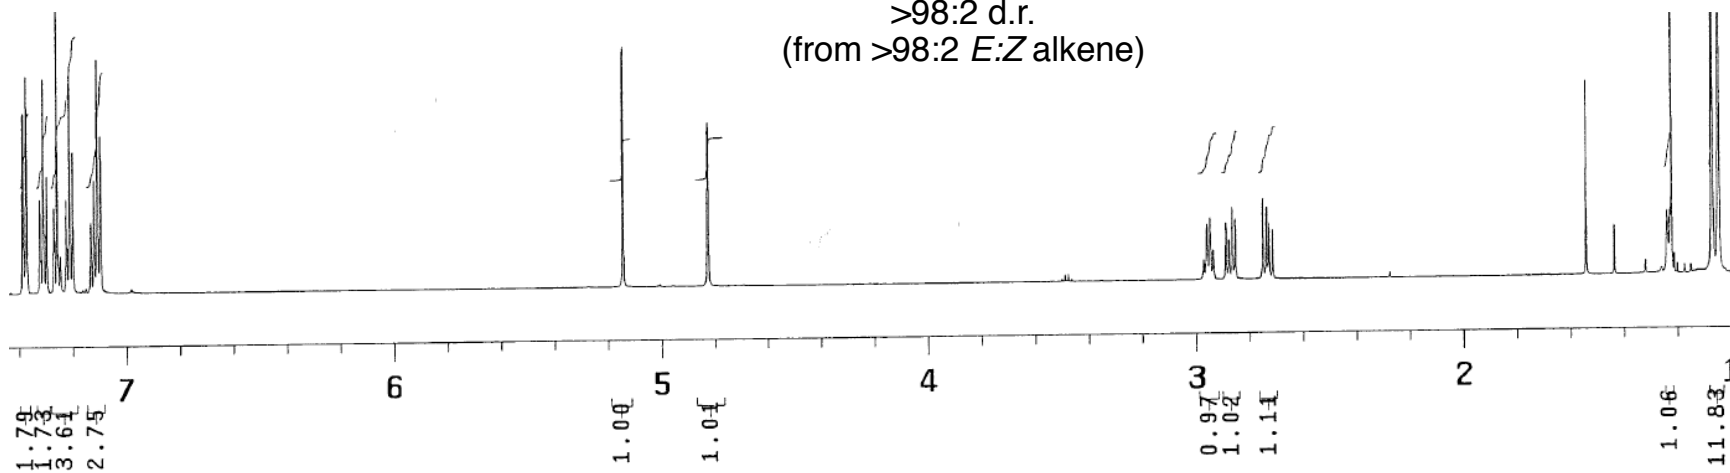

JL-III-106-C-PD

Sample Name:

JL-III-106-C-PD

Data Collected on:

vnmr13-vnmrs400

Archive directory:

Sample directory:

FidFile: JL-III-106-2-C-PD

Pulse Sequence: CARBON (s2pul)

Solvent: cdcl3

Data collected on: Feb 24 2015

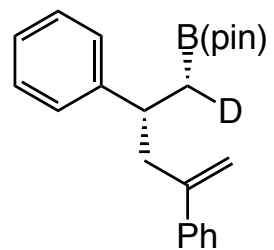

*anti-2n-d*  
>98:2 d.r.  
(from >98:2 *E:Z* alkene)

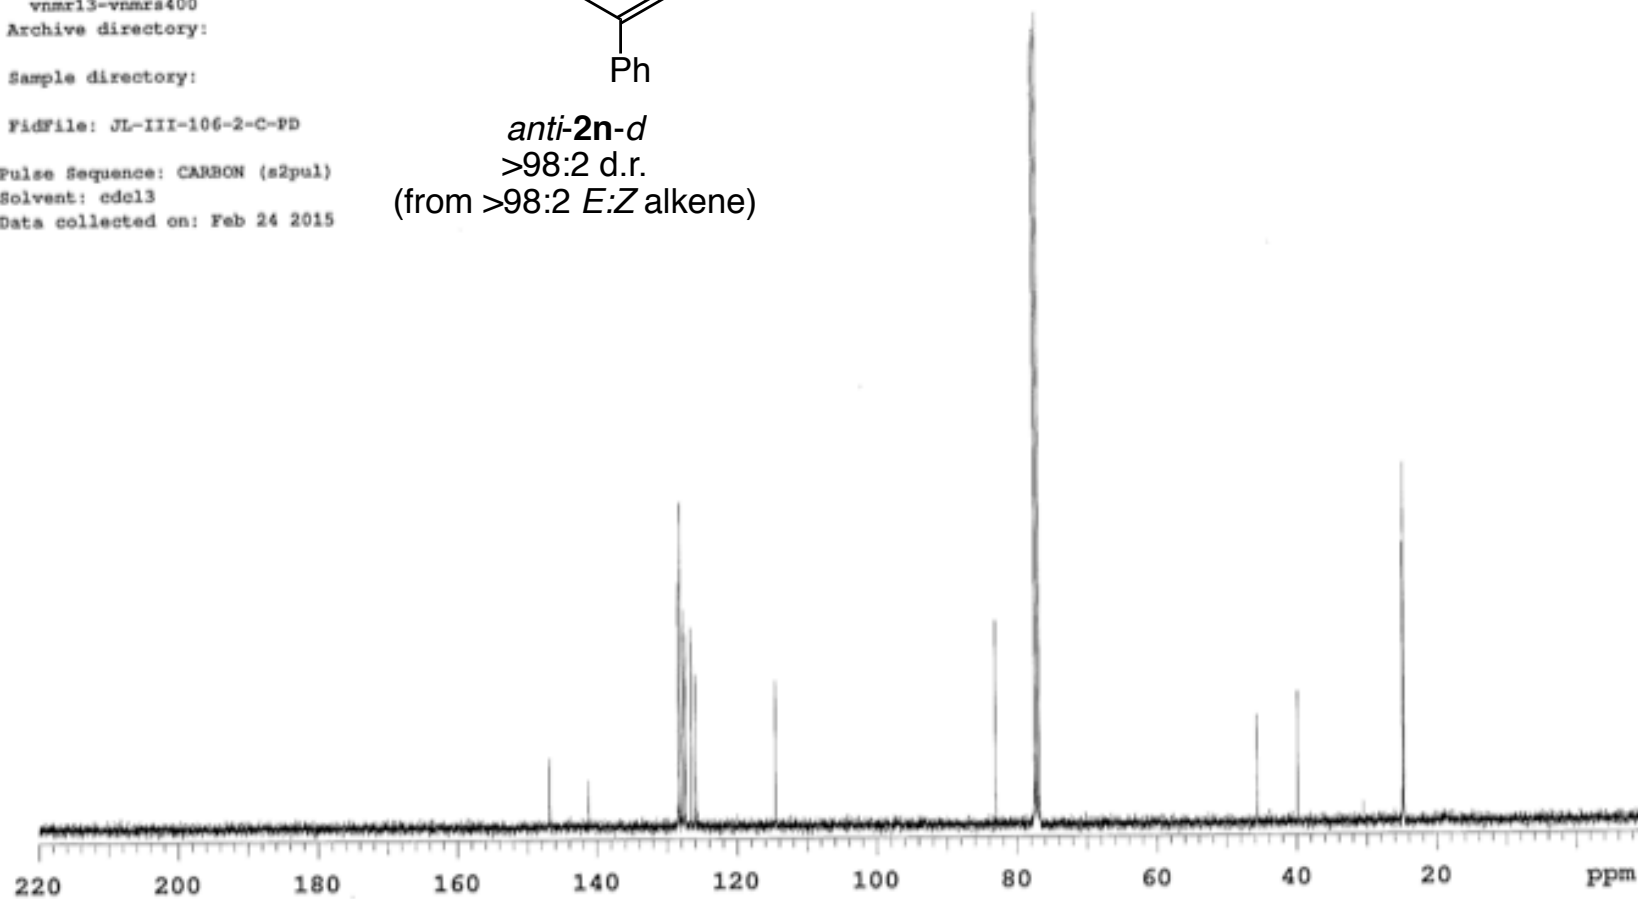

JL-III-252PD

Sample Name:  
 JL-III-252PD  
 Data Collected on:  
 nmr13-vnmrs600  
 Archive directory:

Sample directory:

FidFile: PROTON

Pulse Sequence: PROTON (s2pu1)  
 Solvent: cdc13  
 Data collected on: Jul 15 2015

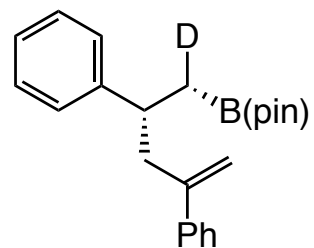

*syn-2n-d*  
 >95:5 d.r.  
 (from 96:4 Z:E alkene)

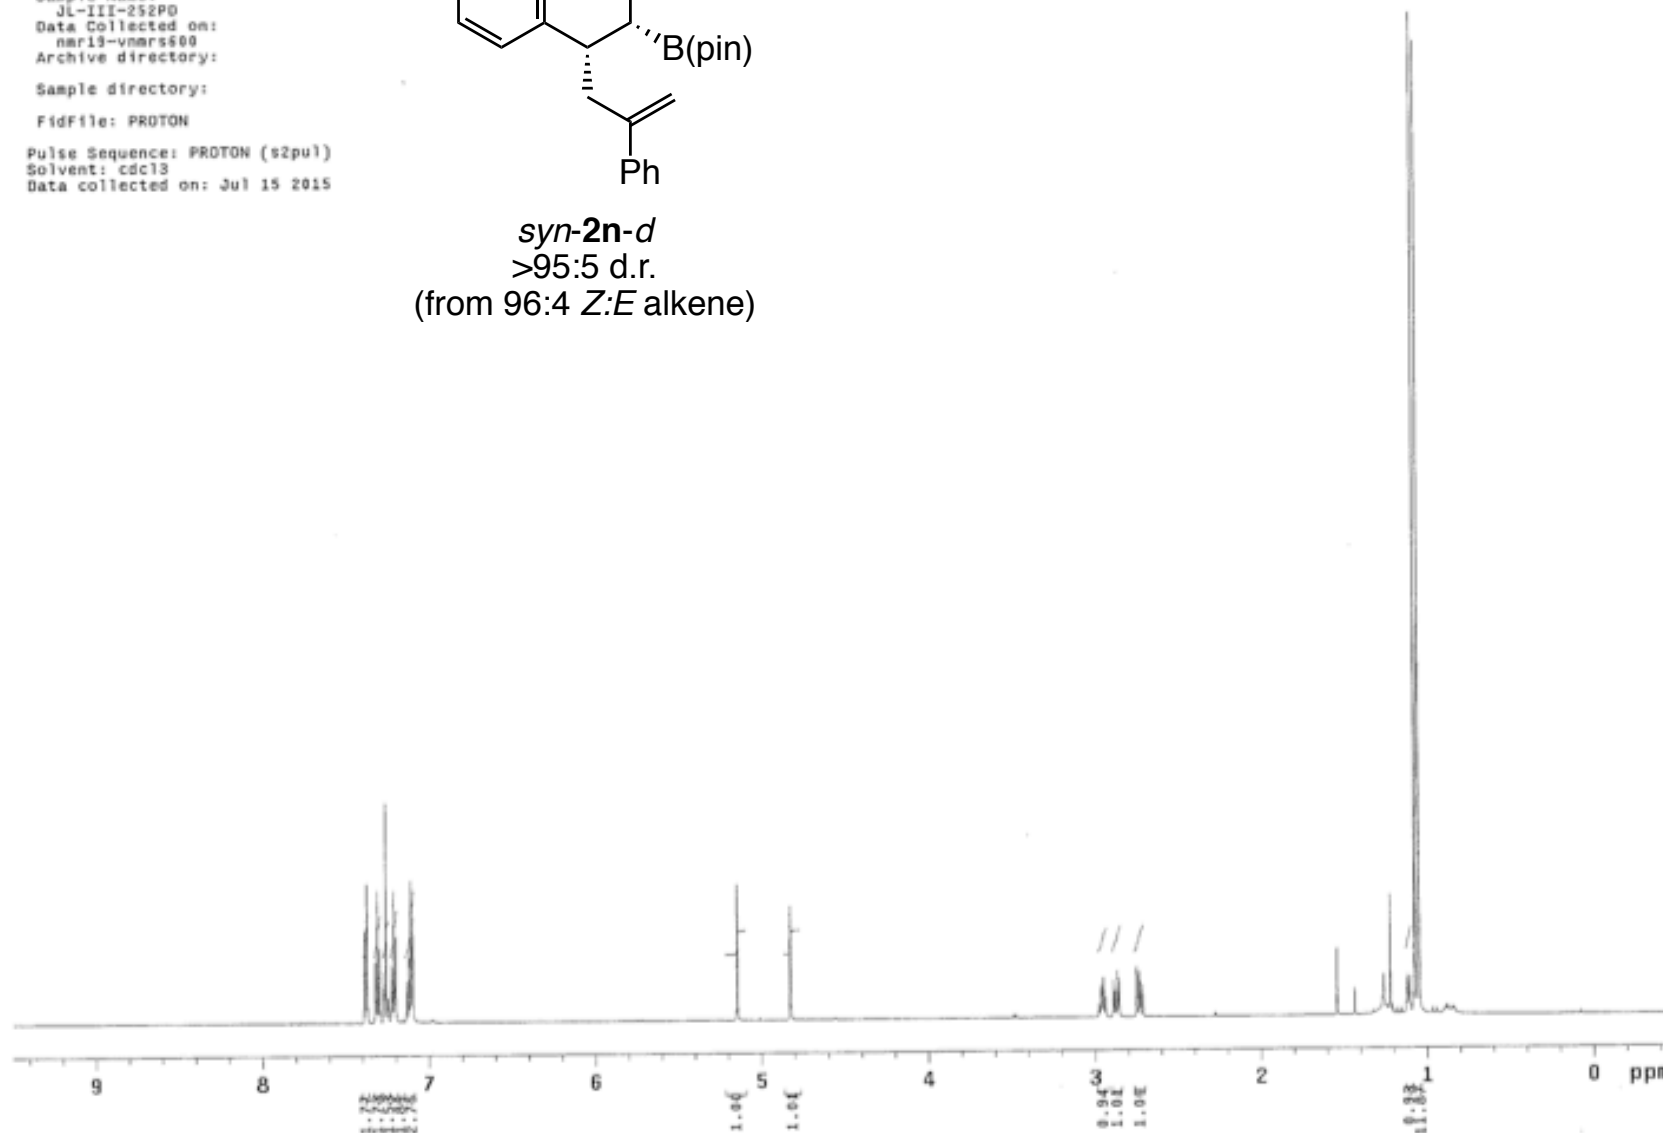

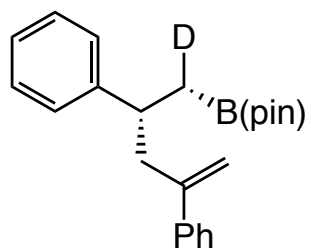

*syn-2n-d*  
>95:5 d.r.  
(from 96:4 Z:E alkene)

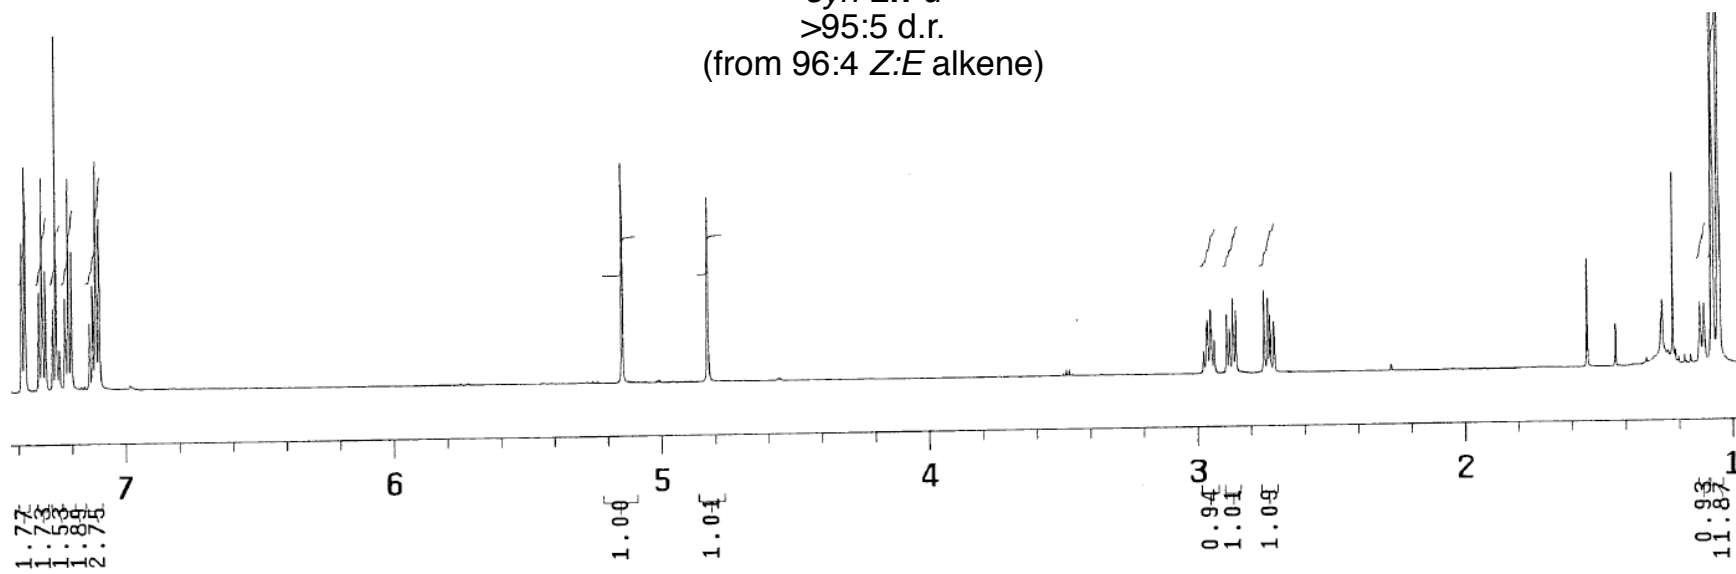



JL-III-107-PD-C

Sample Name:

JL-III-107-PD-C

Data Collected on:

vnmr13-vnmrs400

Archive directory:

Sample directory:

FidFile: JL-III-107-2-C-PD

Pulse Sequence: CARBON (s2pul)

Solvent: cdcl3

Data collected on: Feb 25 2015

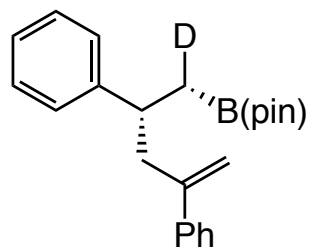

*syn-2n-d*  
>95:5 d.r.  
(from 96:4 Z:E alkene)

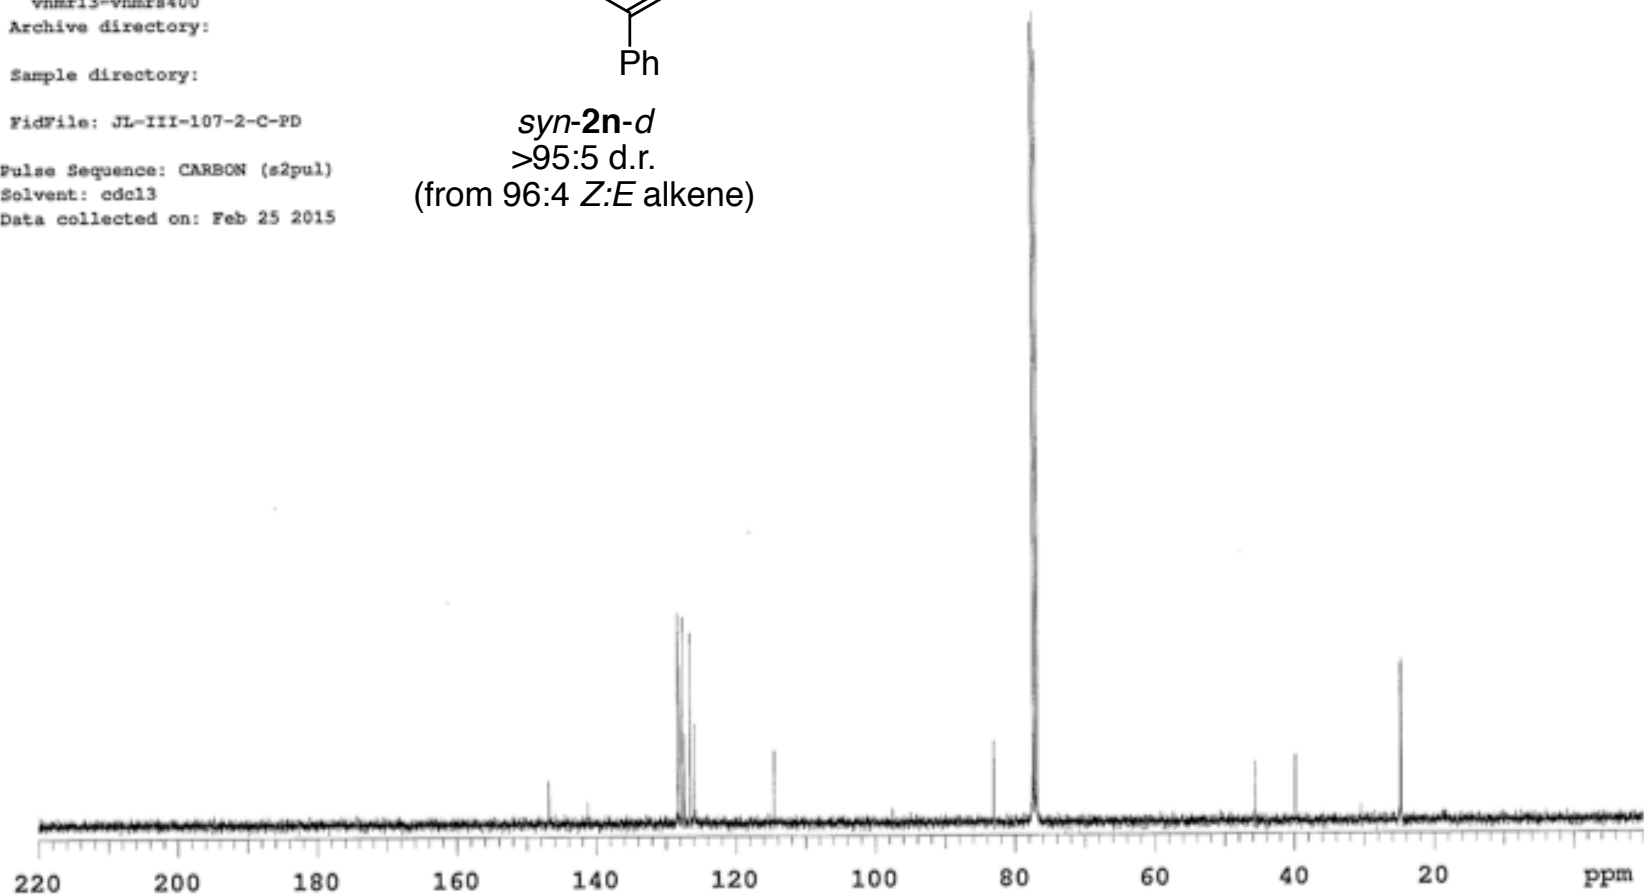

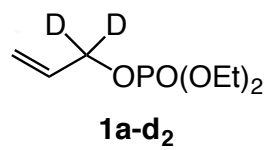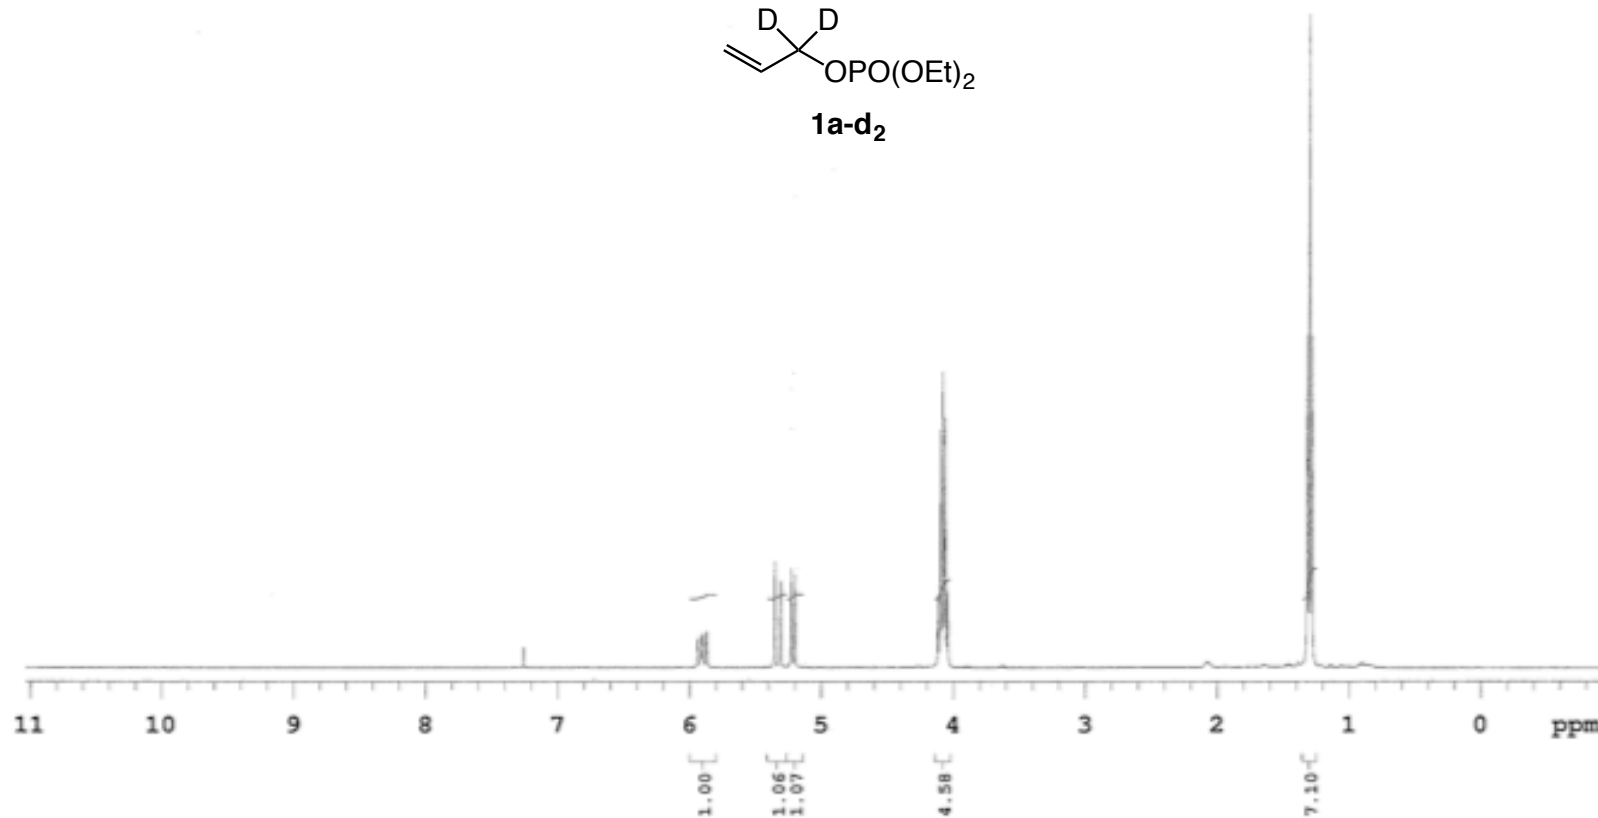

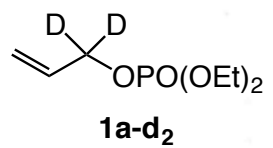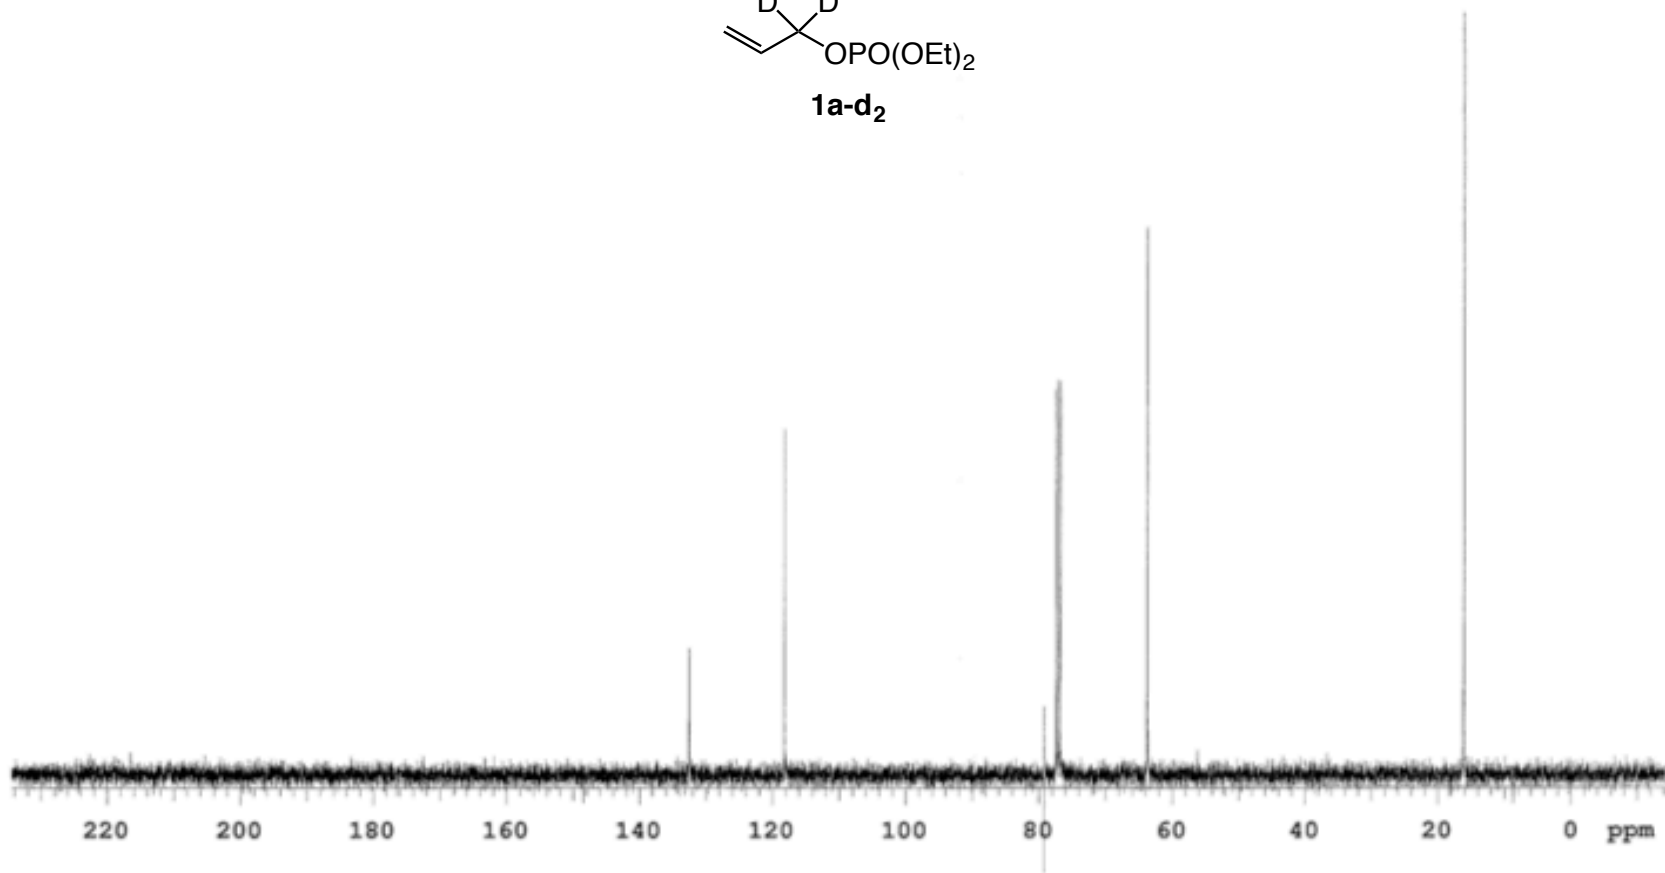

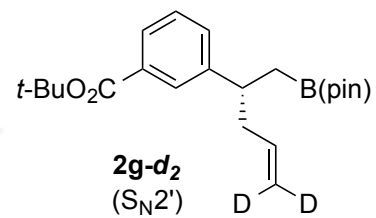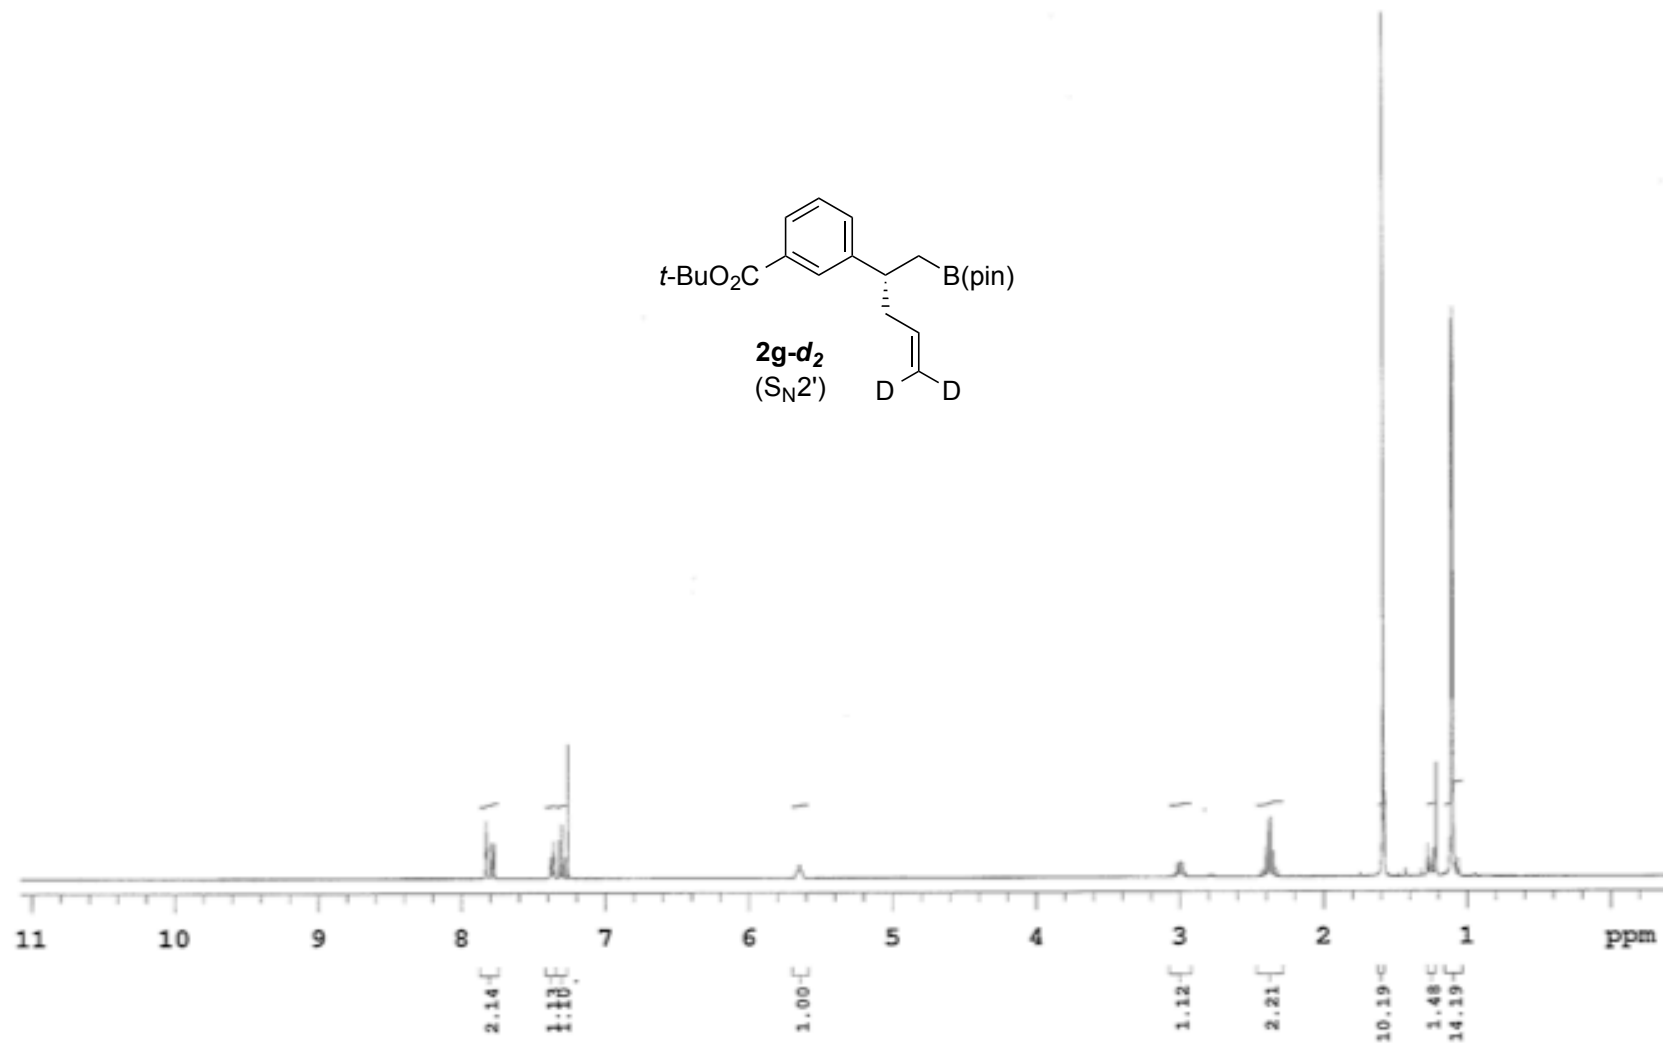

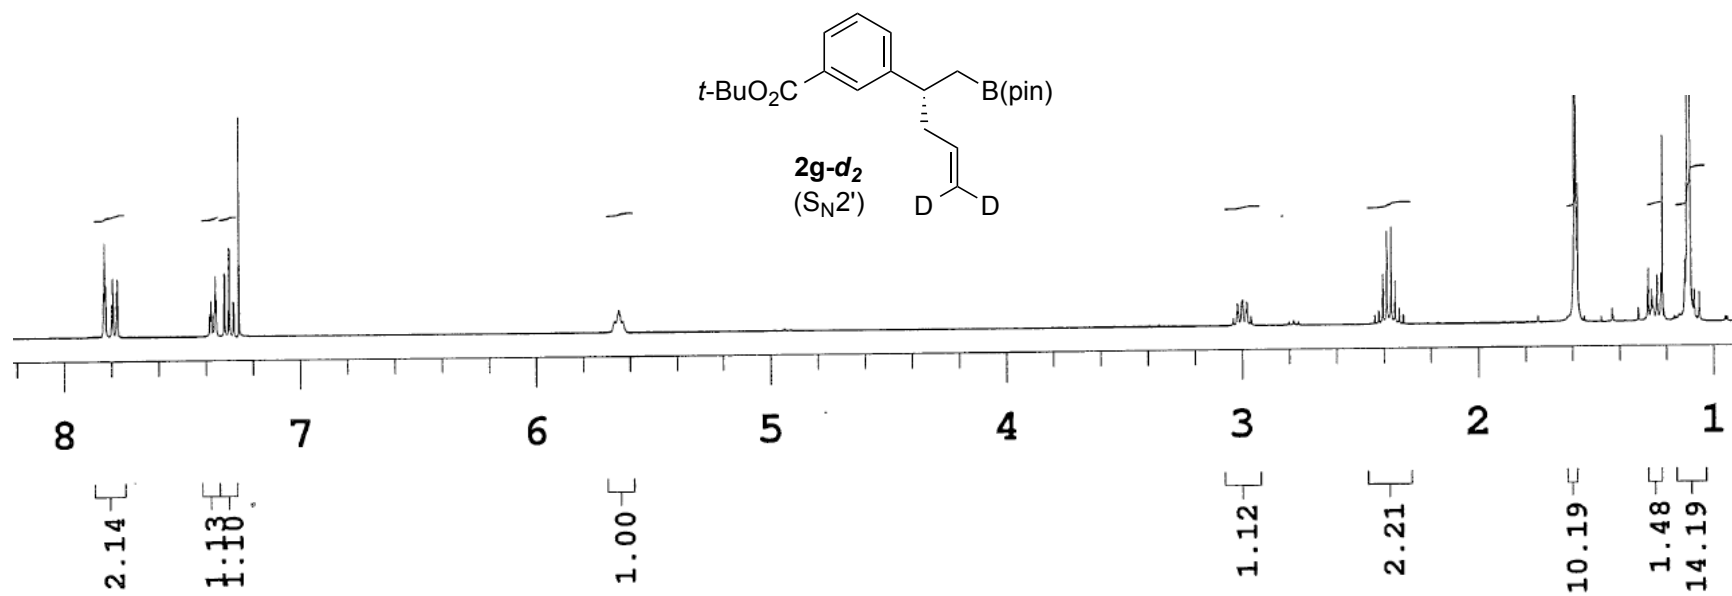

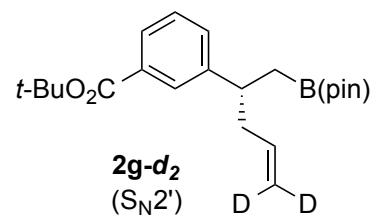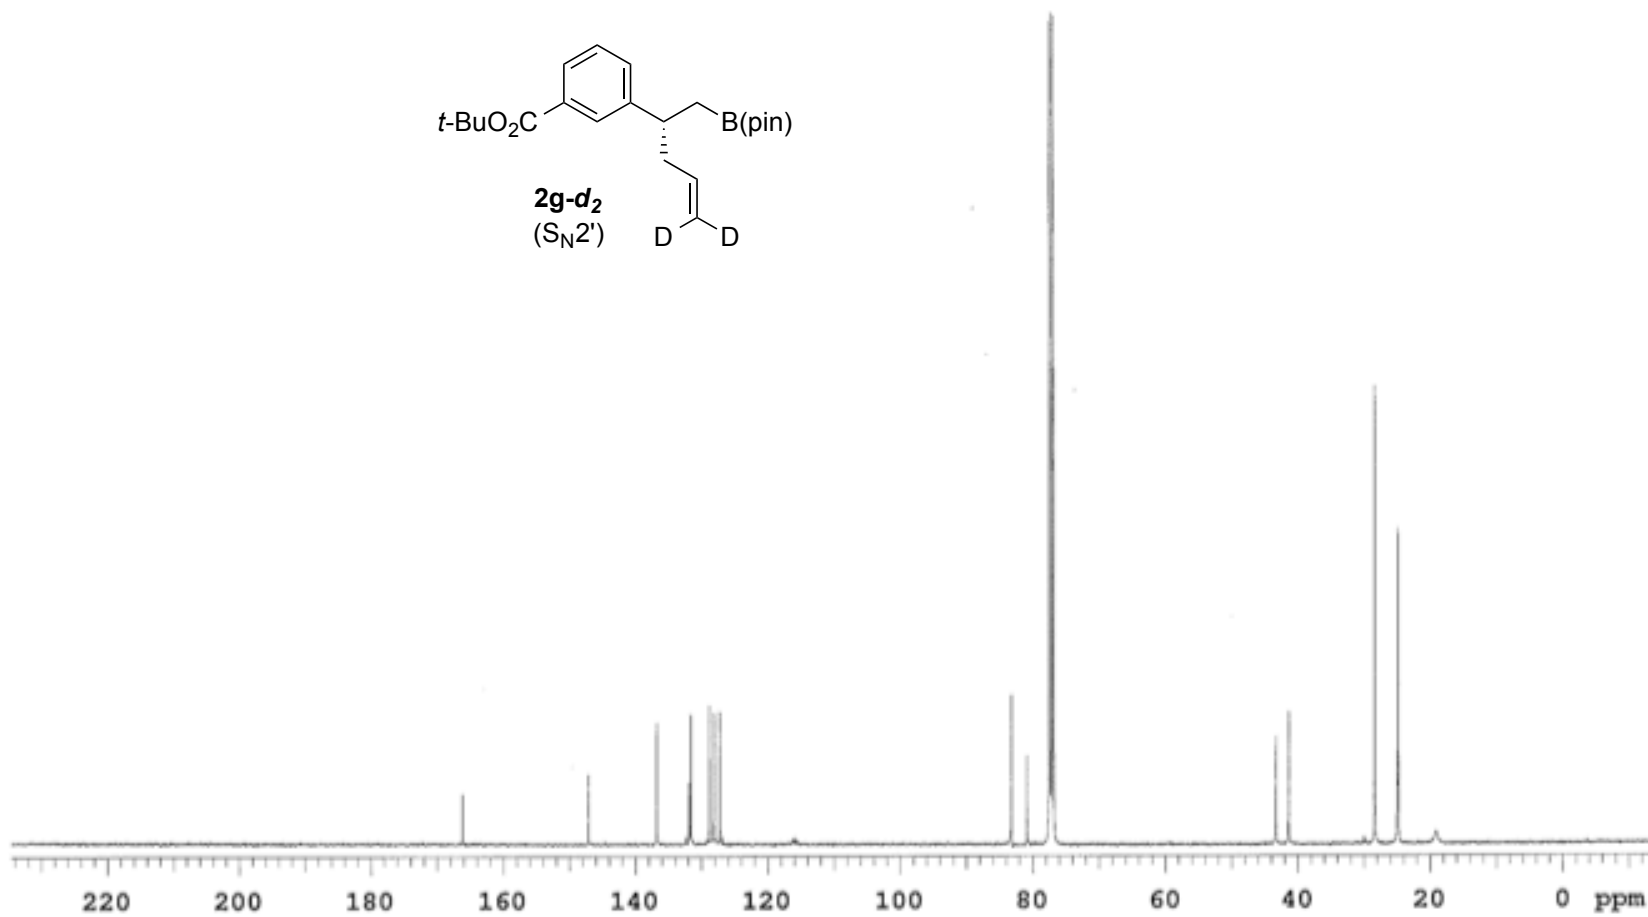

JL-IV-169-2PD

Sample Name:  
 JL-IV-169-2PD  
 Data Collected on:  
 nmr13-vnmrs400  
 Archive directory:  
 Sample directory:

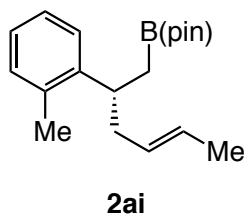

FidFile: JL-IV-169PD-2

Pulse Sequence: PROTON (s2pul)  
 Solvent: cdcl3  
 Data collected on: Jan 21 2016

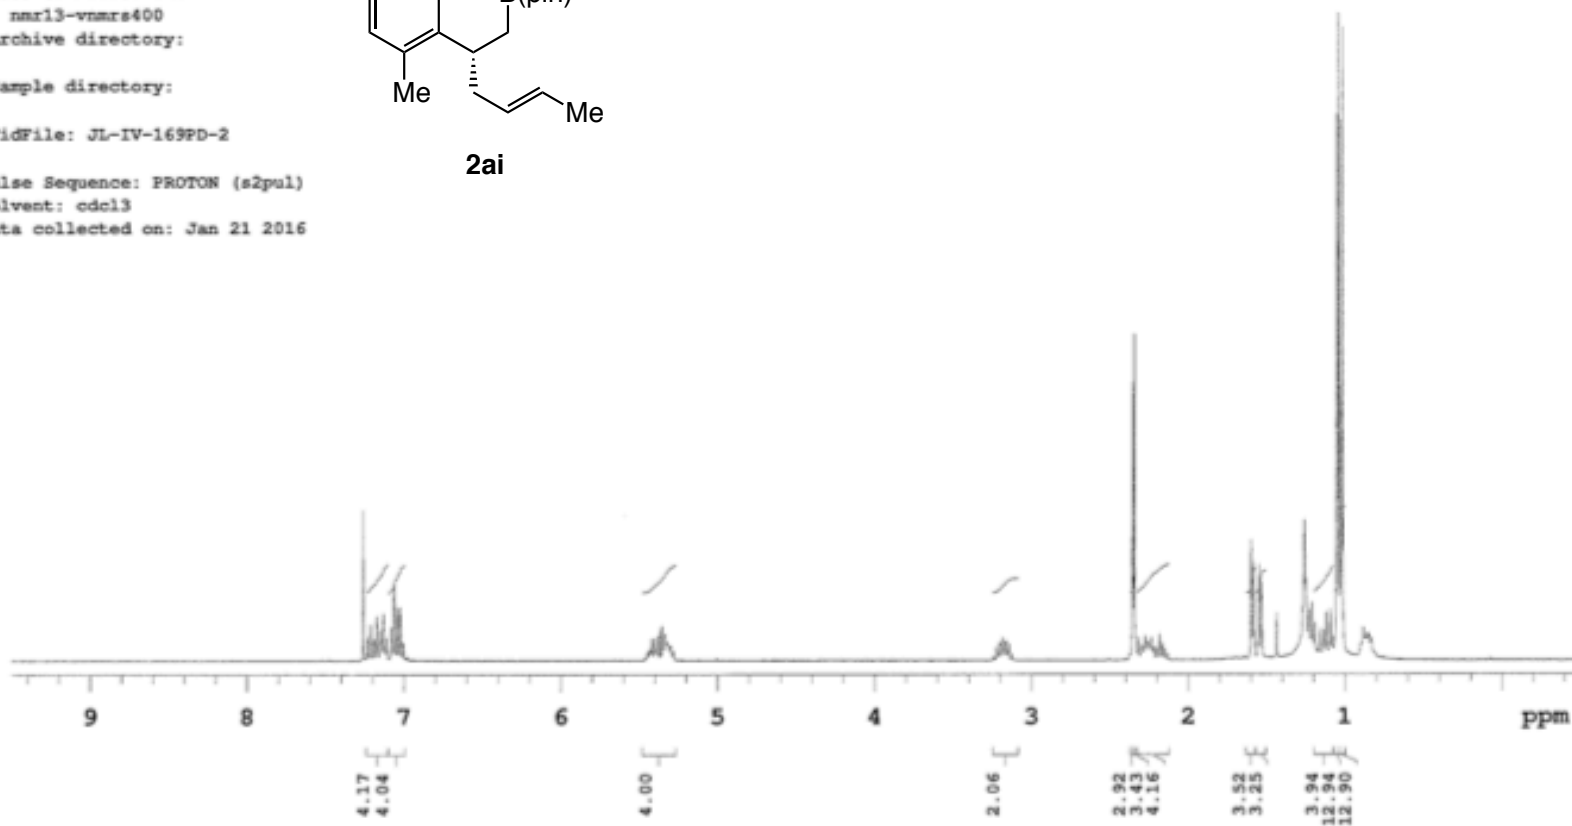

Sample Name:  
JL-11-252PD  
Data Collected on:  
vnmr13-vnmrs480  
Archive directory:  
Sample directory:  
Fidfile: PROTON  
Pulse Sequence: PROTON (s2pu1)  
Solvent: cdcl3  
Data collected on: Nov 4 2014

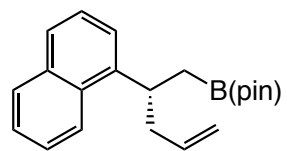

2af

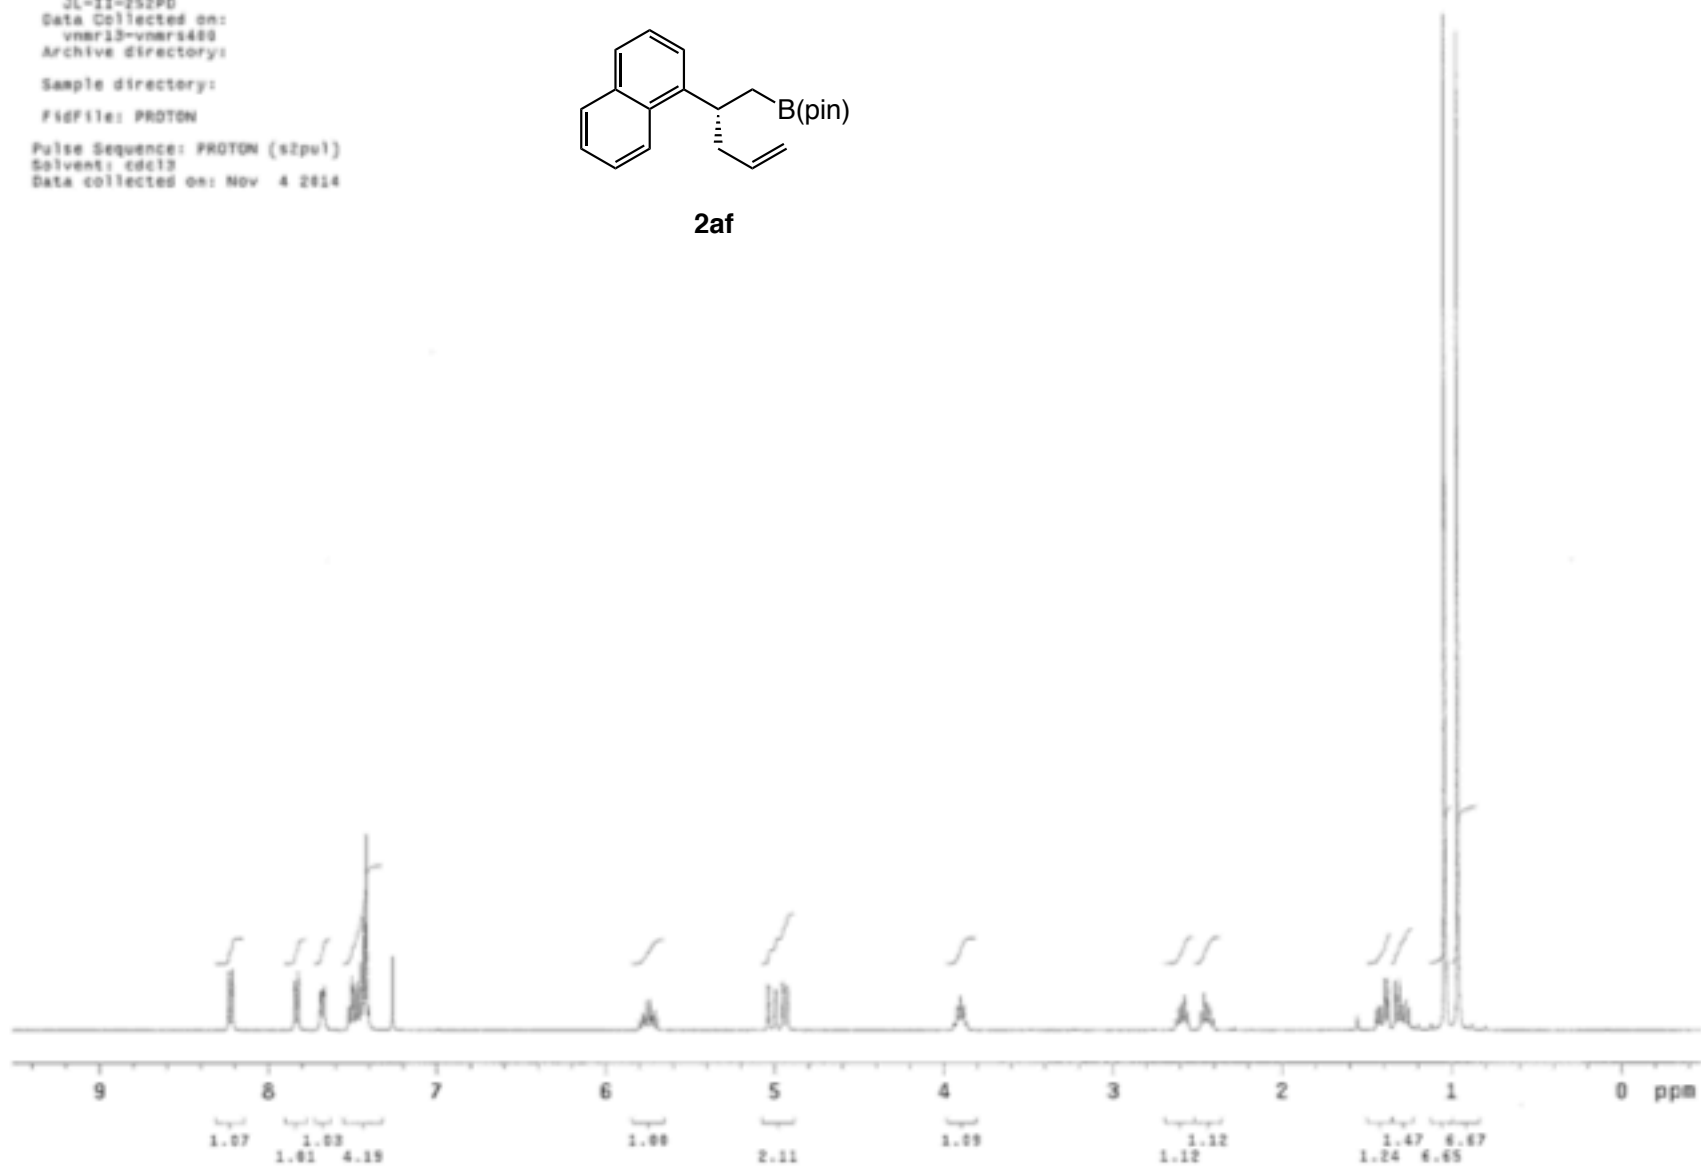



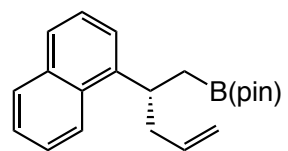

**2af**

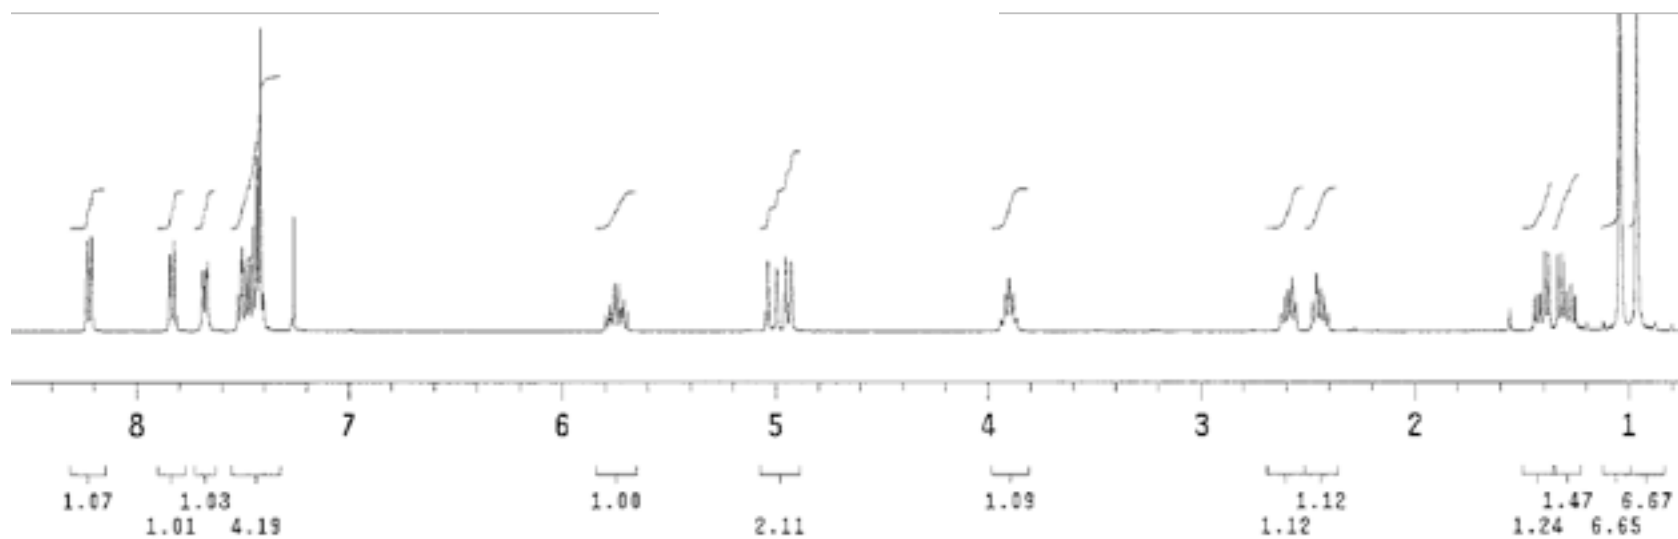

JL-II-2529D-C

Sample Name:

JL-II-2529D-C

Date Collected on:

10/12/2014

Archive directory:

Sample directory:

FidFile: JL-II-2529D-C

Pulse Sequence: zgpg30 (cpul)

Solvent: CDCl3

Data collected on: Nov 4 2014

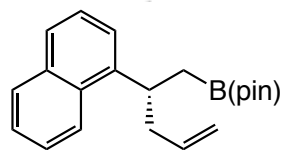

**2af**

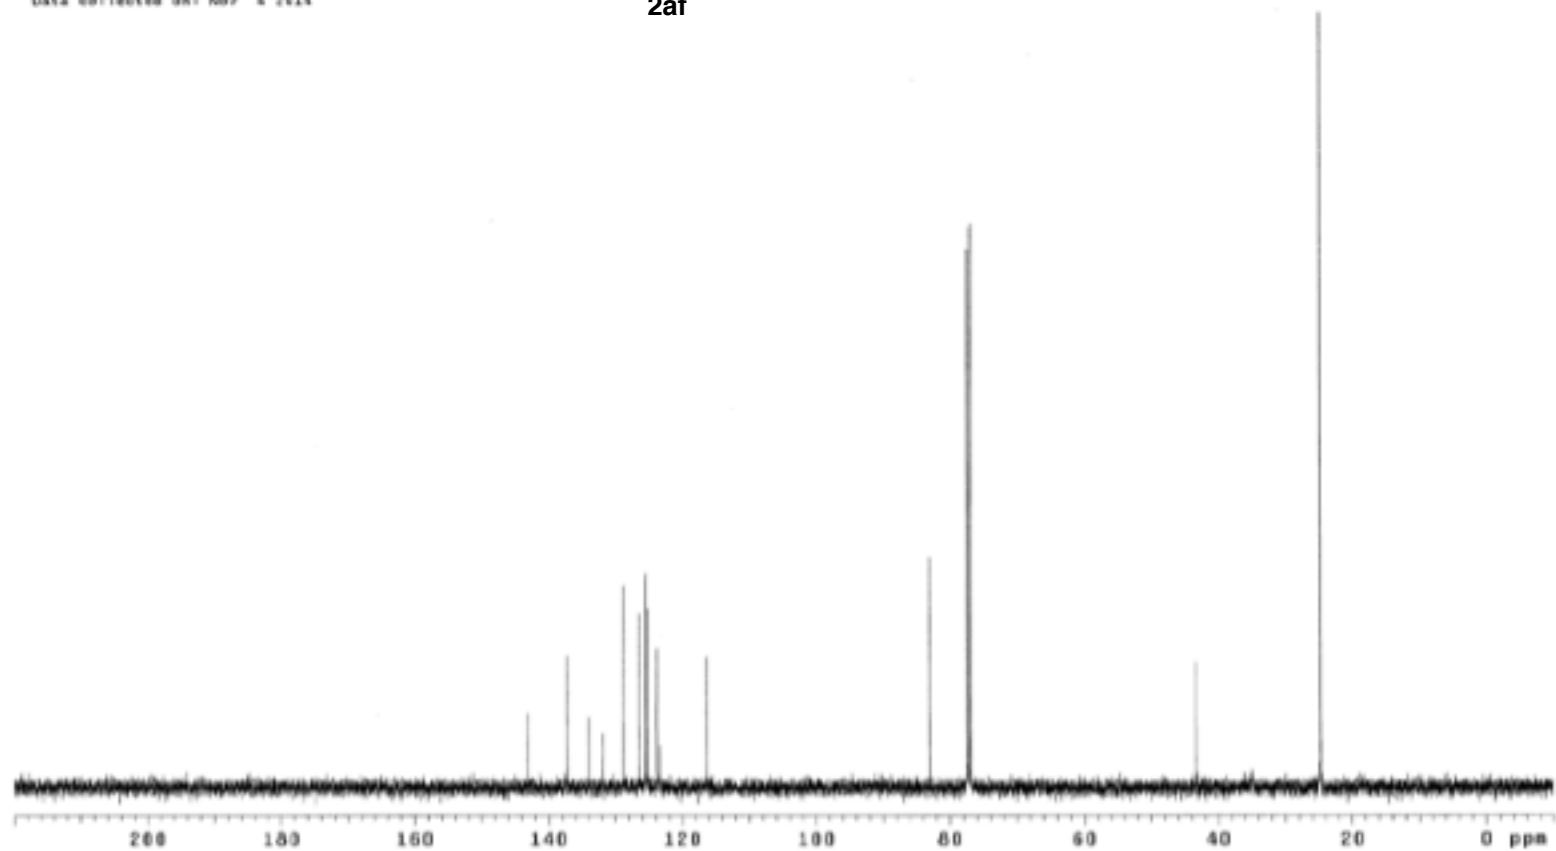

Sample Name:  
SR-V-48  
Data Collected on:  
nar18-vnmrs600  
Archive directory:  
Sample directory:  
Fidfile: PROTON  
Pulse Sequence: PROTON (s2pu1)  
Solvent: cdcl3  
Data collected on: Jan 28 2015

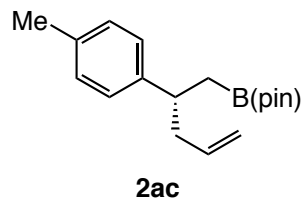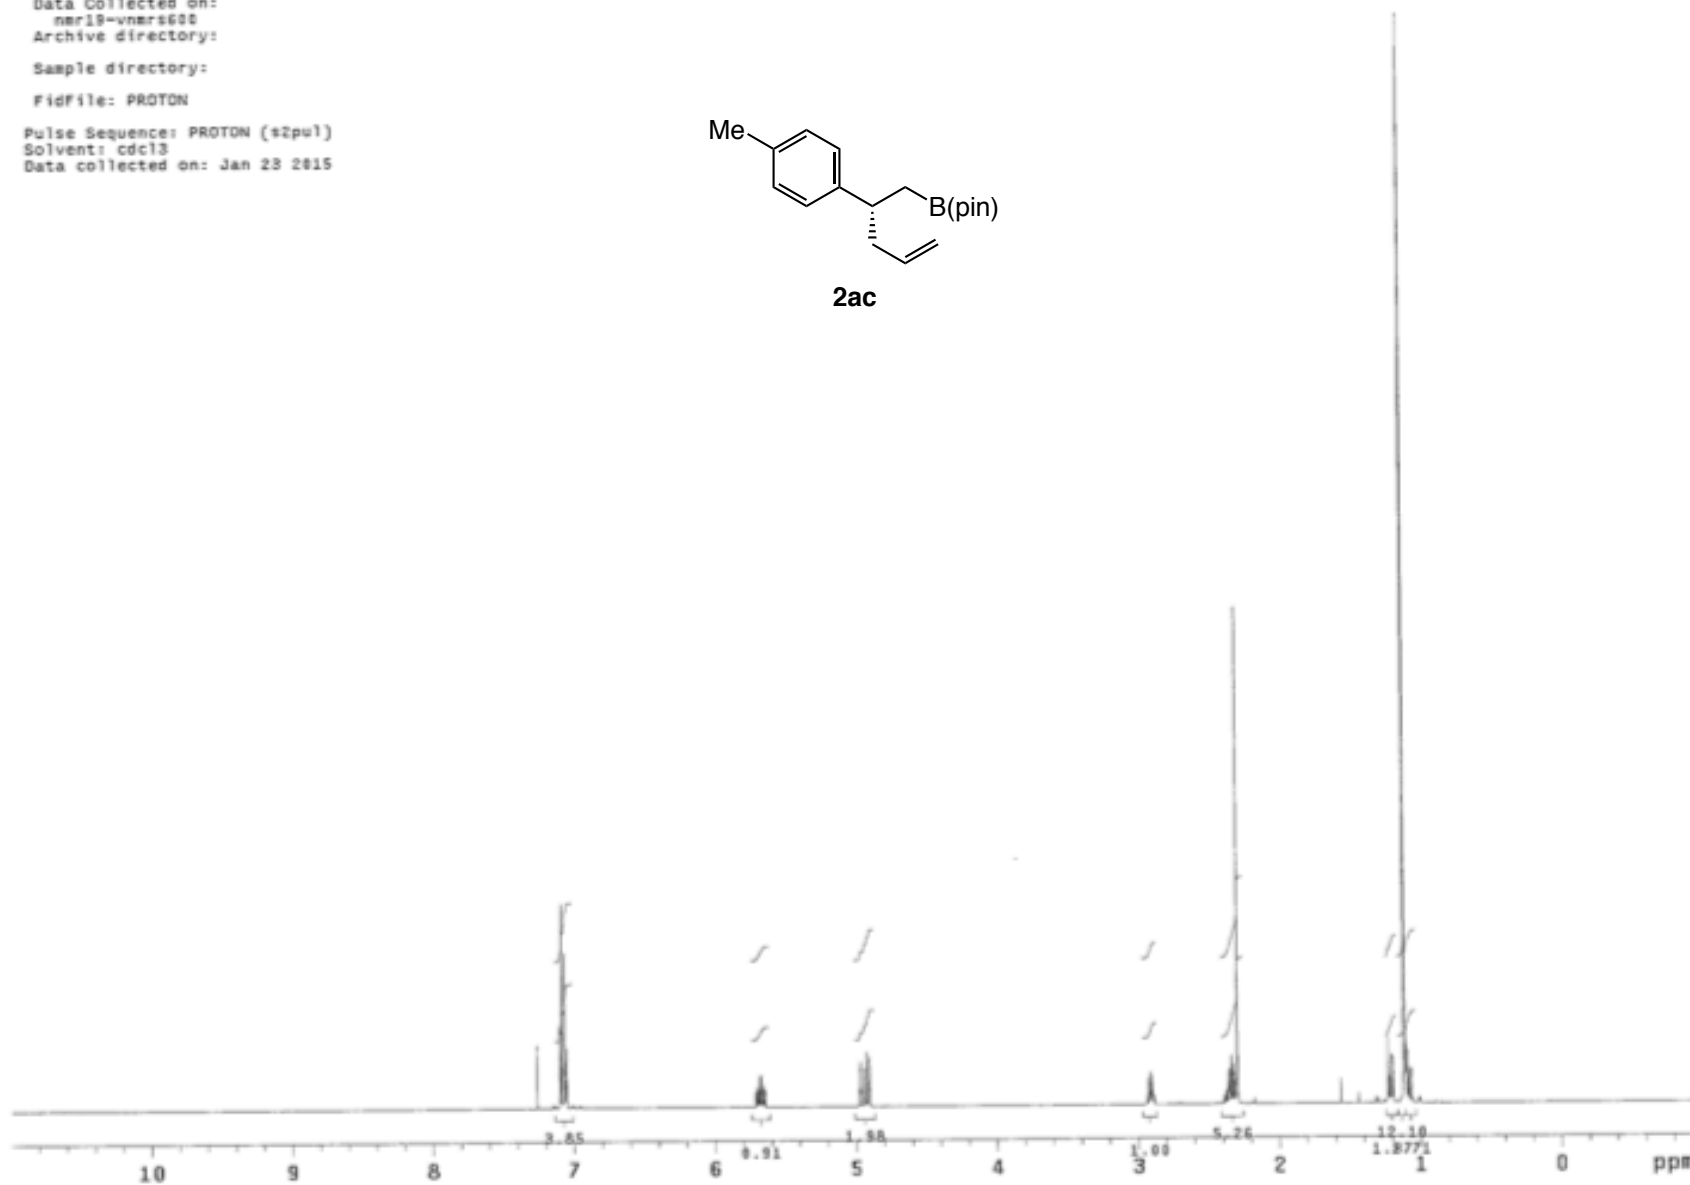

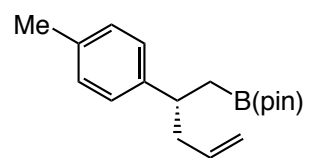

**2ac**

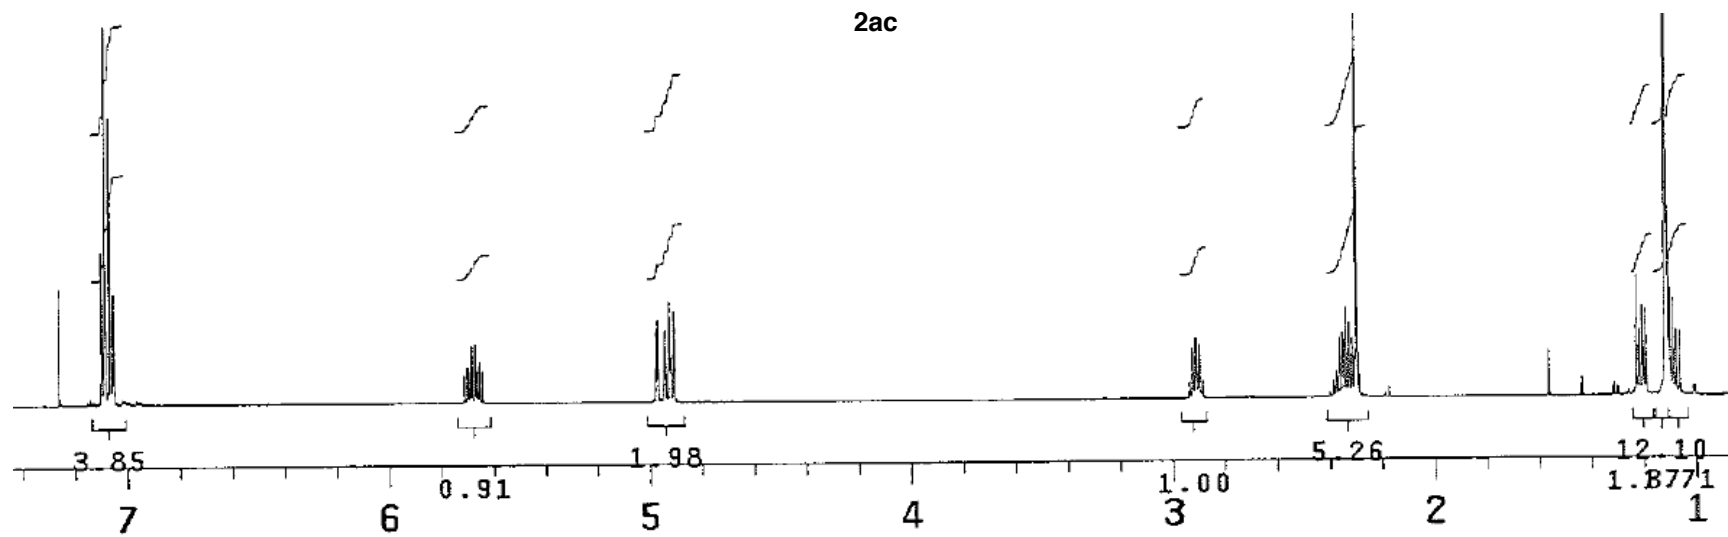

Sample Name:  
SR-V-48-carbon  
Data Collected on:  
nmr19-nmrs660  
Archive directory:  
Sample directory:  
FidFile: CARBON  
Pulse Sequence: CARBON (s2pu1)  
Solvent: cdcl3  
Data collected on: Jan 23 2015

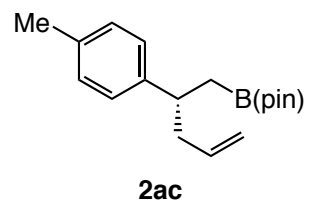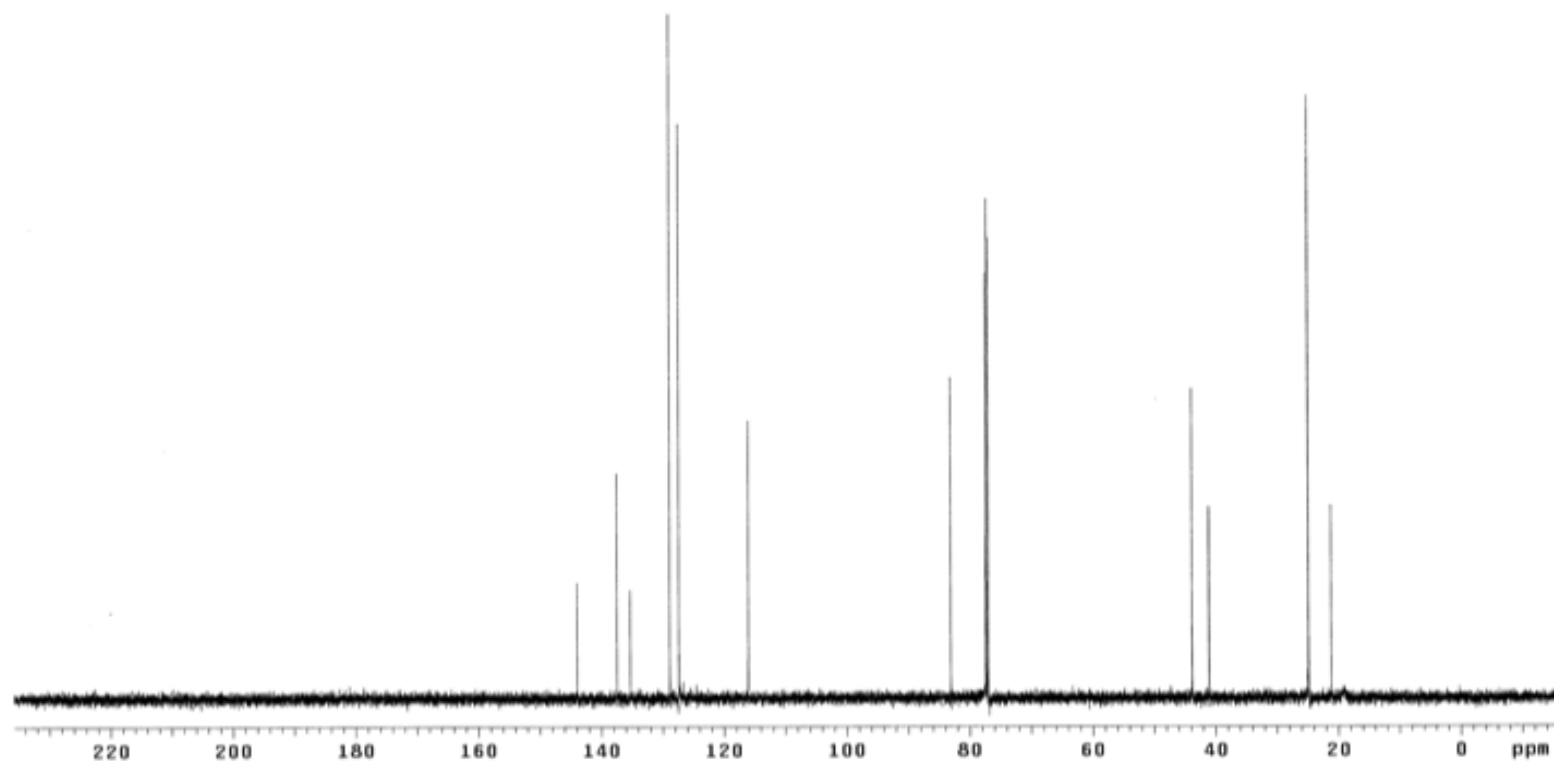

Sample Name:  
 JL-II-257PD  
 Data Collected on:  
 vnr13-vnr1409  
 Archive directory:  
 Sample directory:  
 FidFile: JL-III-275-5PD  
 Pulse Sequence: PROTON (s2pu1)  
 Solvent: cdc13  
 Data collected on: Feb 20 2015

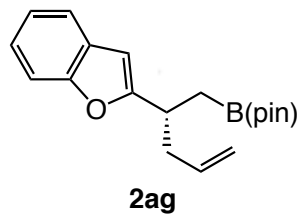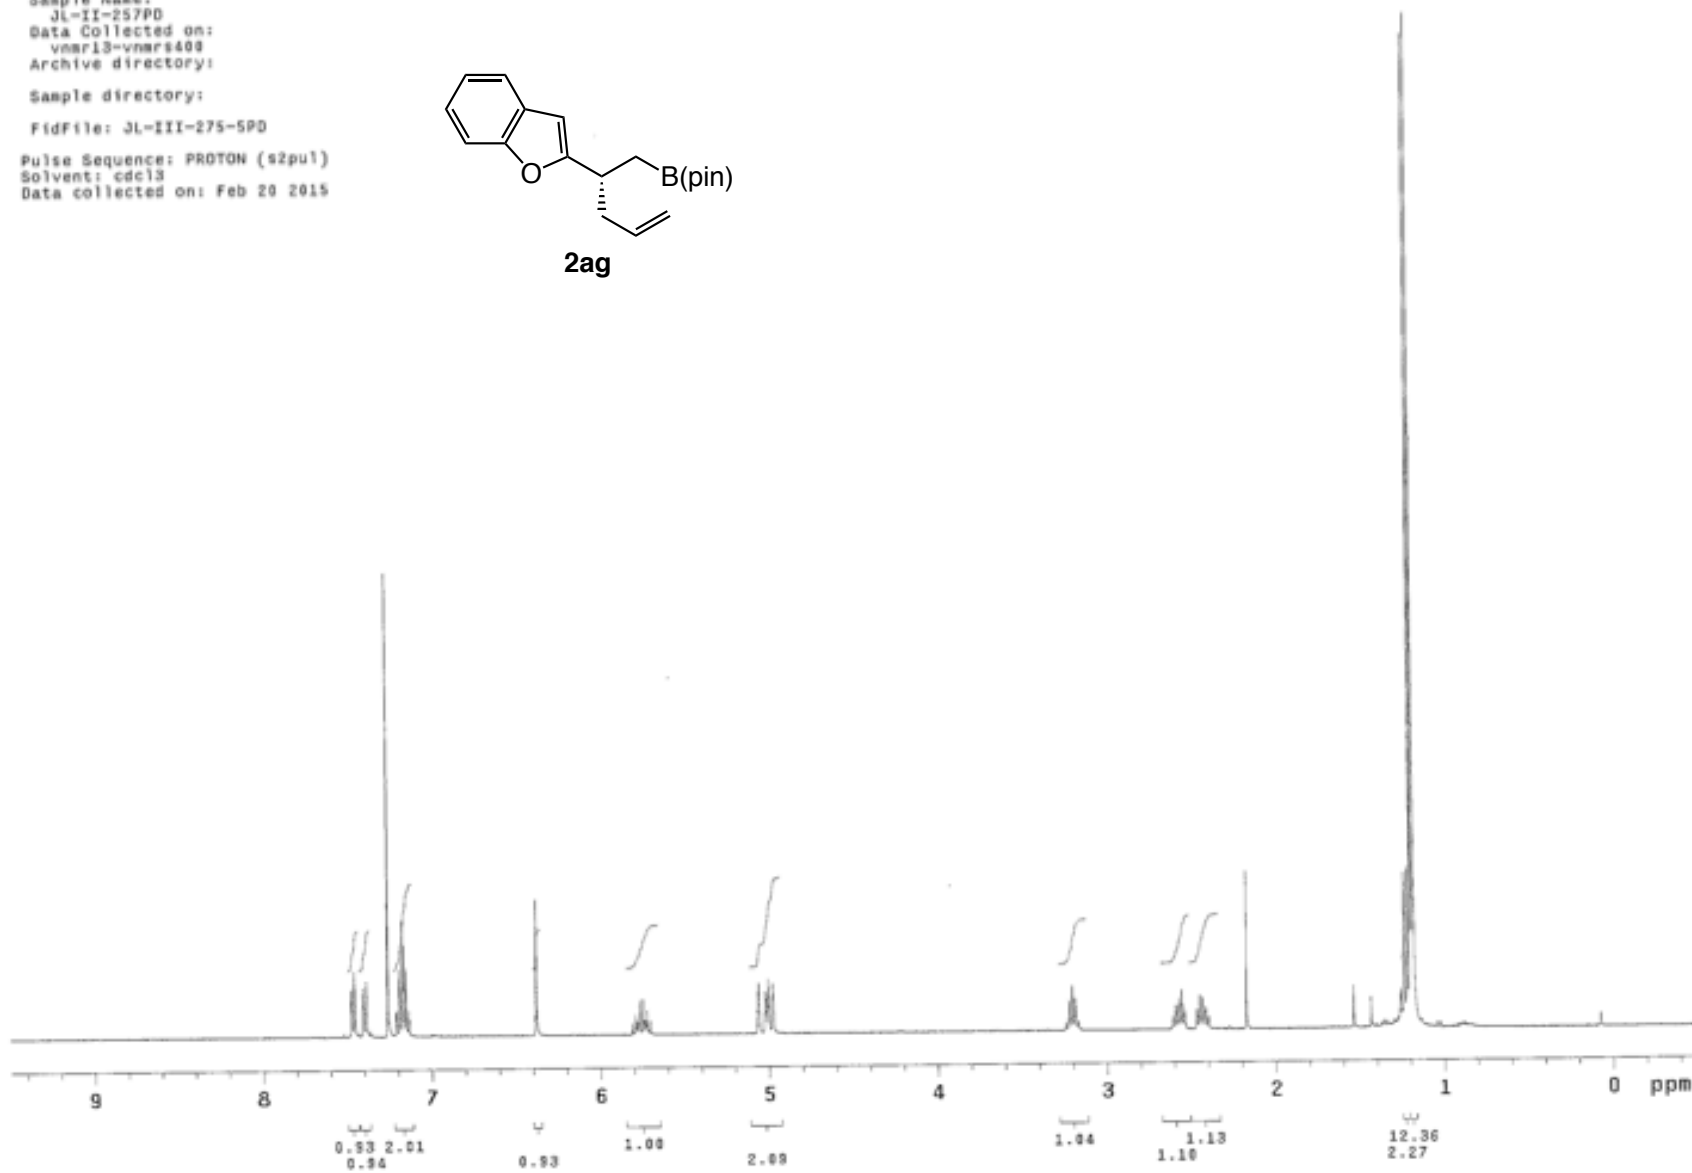

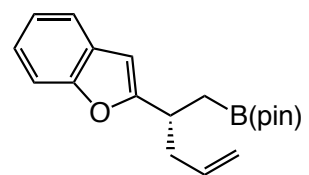

2ag

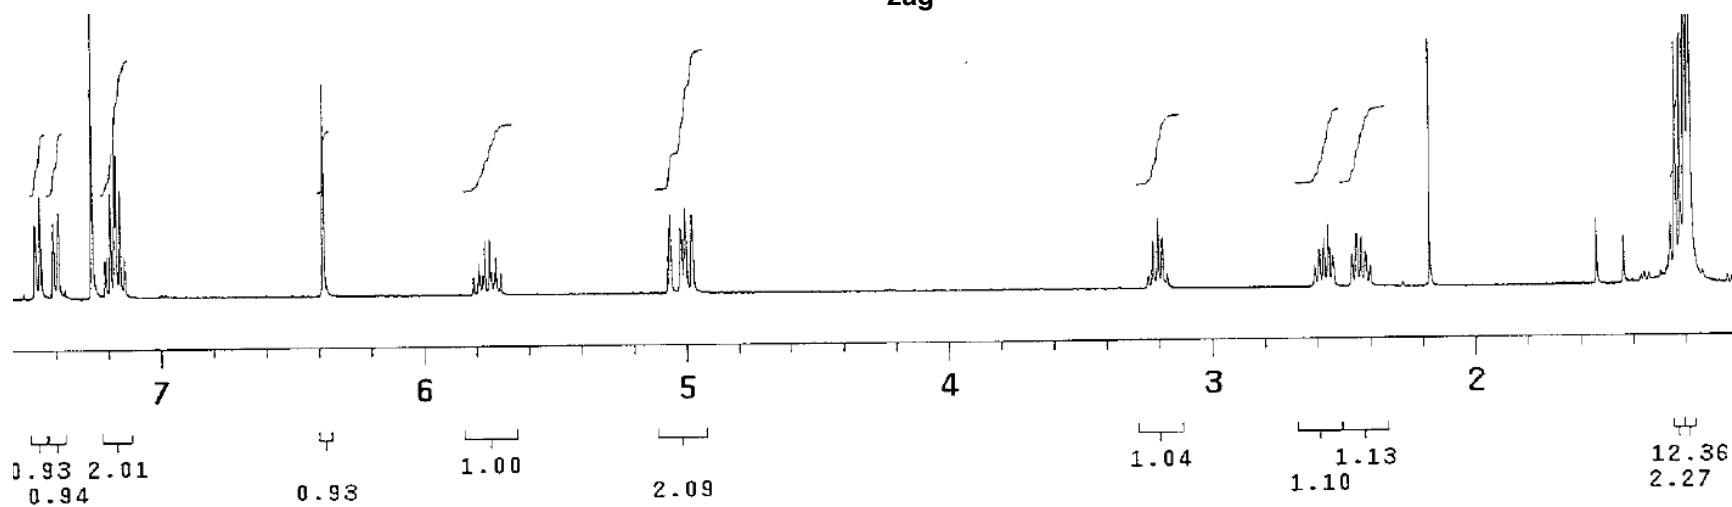

JL-III-127PD-C

Sample Name:  
JL-III-127PD-C  
Data Collected on:  
vnmr13-vnmrs400  
Archive directory:  
Sample directory:  
FidFile: JL-III-127PD-C  
Pulse Sequence: CARBON (s2pu1)  
Solvent: cdcl3  
Data collected on: Mar 20 2015

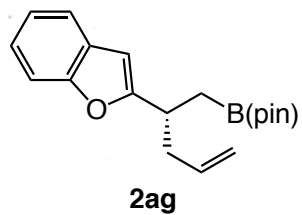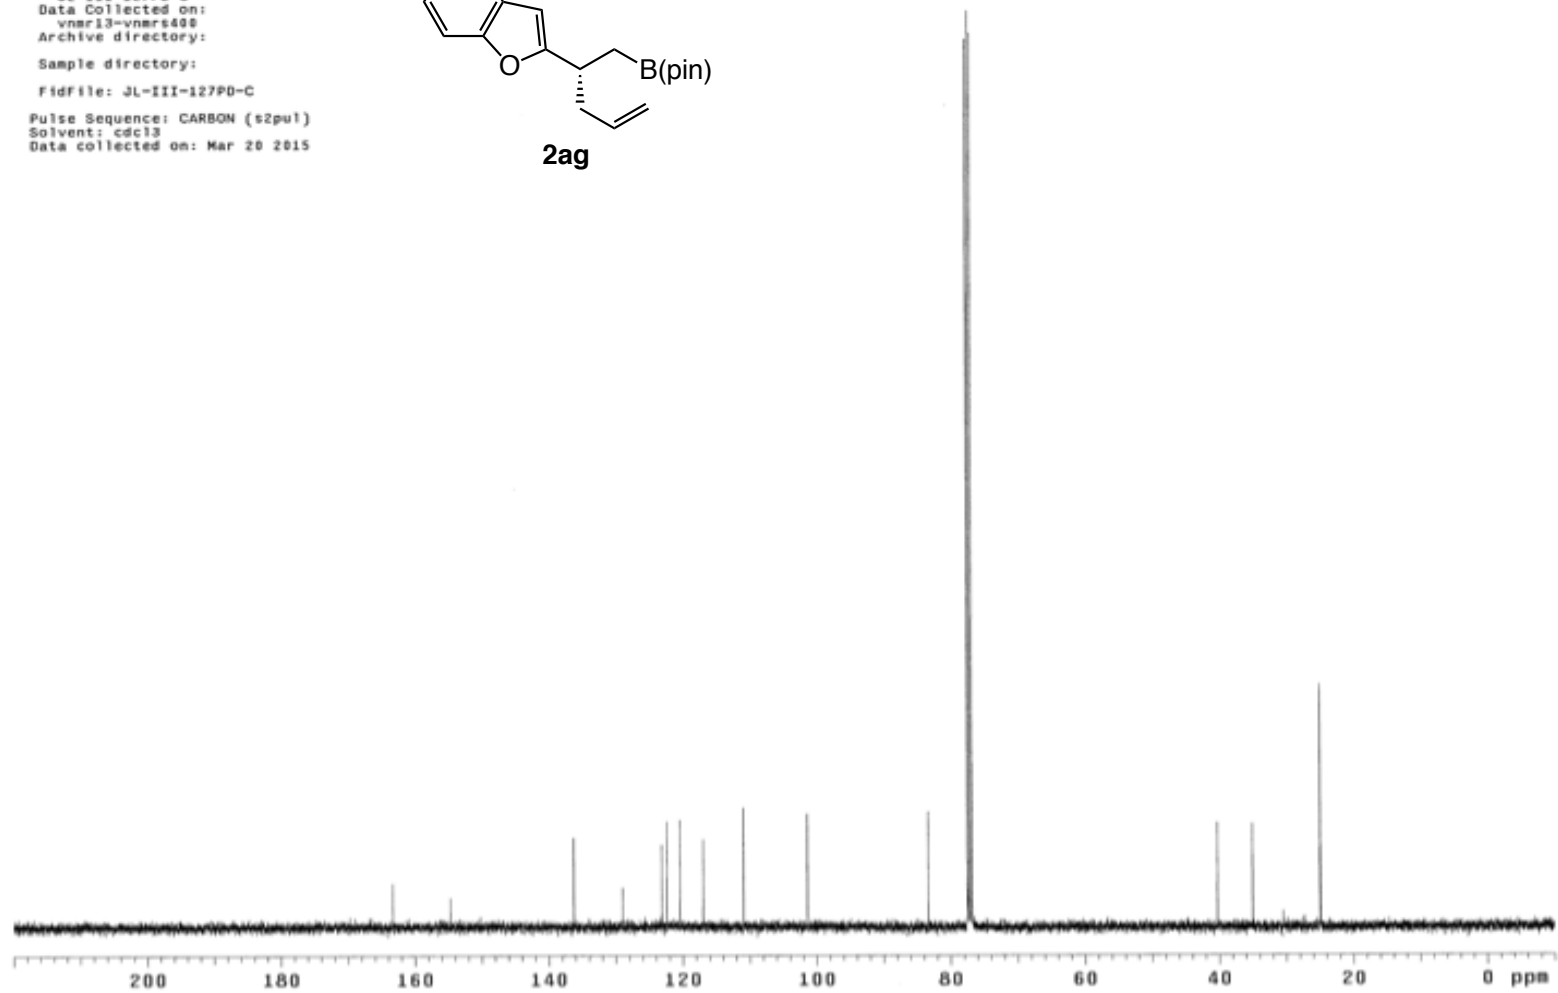



Sample Name:  
SR-IV-263-8  
Data Collected on:  
vnmr13-vnmrs400  
Archive directory:  
Sample directory:  
Fidfile: PROTON  
Pulse Sequence: PROTON (s2pu1)  
Solvent: cdcl3  
Data collected on: Sep 26 2014

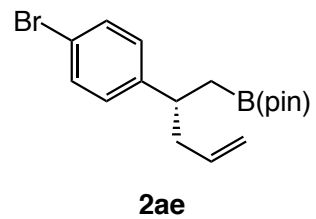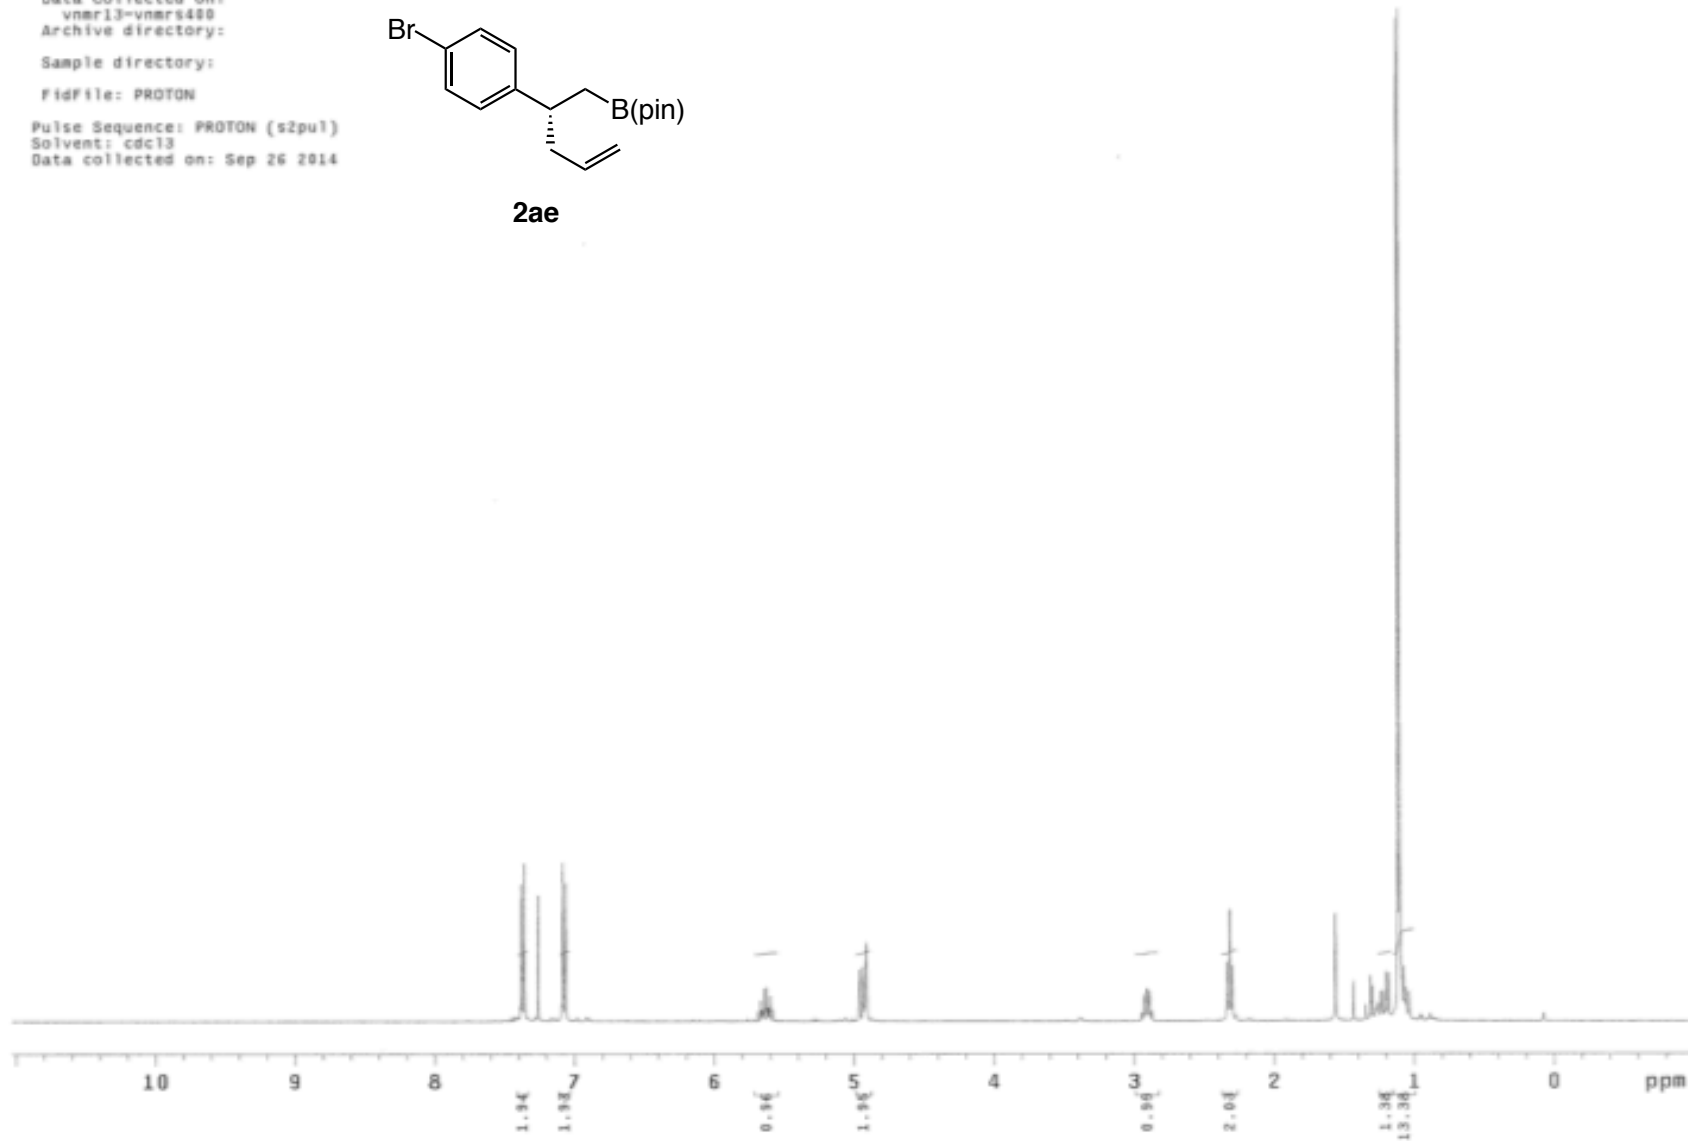

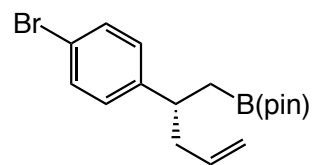

2ae

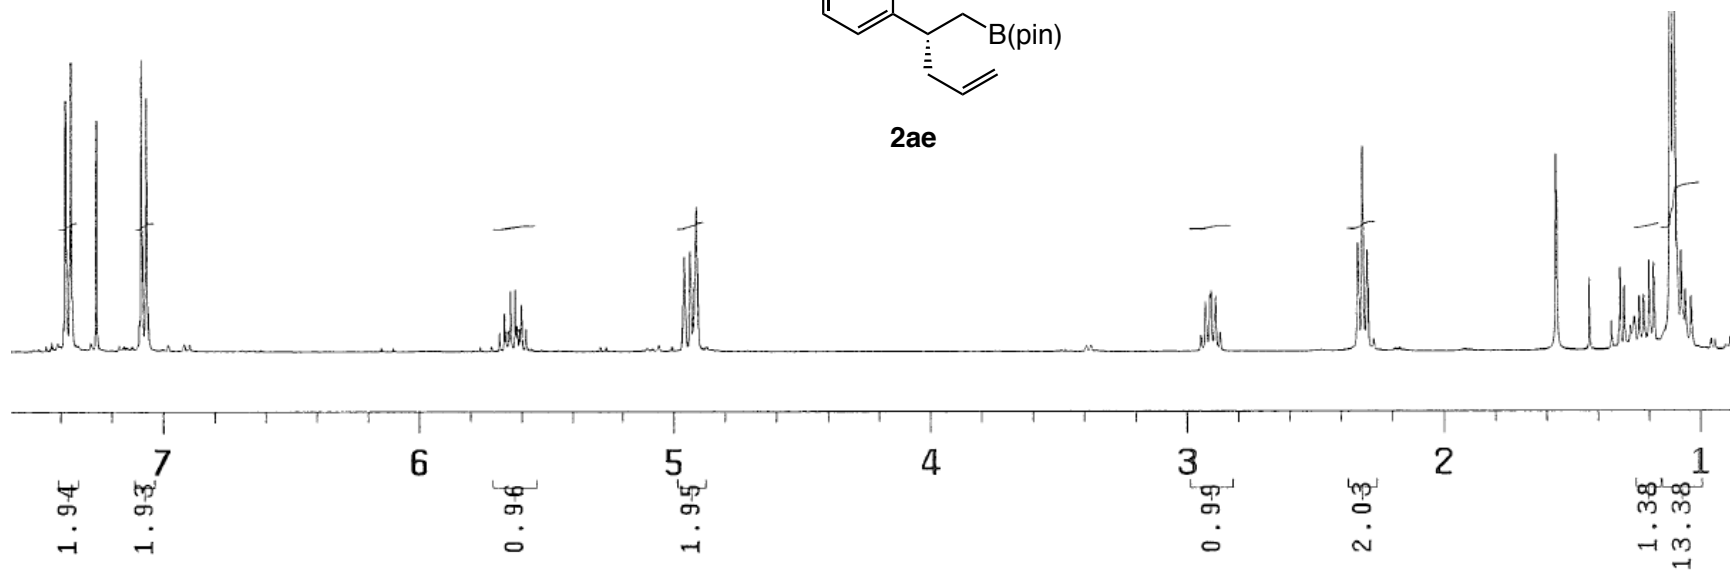

Sample Name: SR-IV-263-3-carbon  
Data Collected on: vnmr13-vnmrs400  
Archive directory:  
Sample directory:  
FidFile: SR-IV-263-3-carbon  
Pulse Sequence: CARBON (s2pu1)  
Solvent: cdcl3  
Data collected on: Sep 26 2014

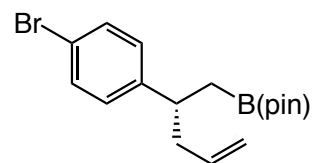

2ae

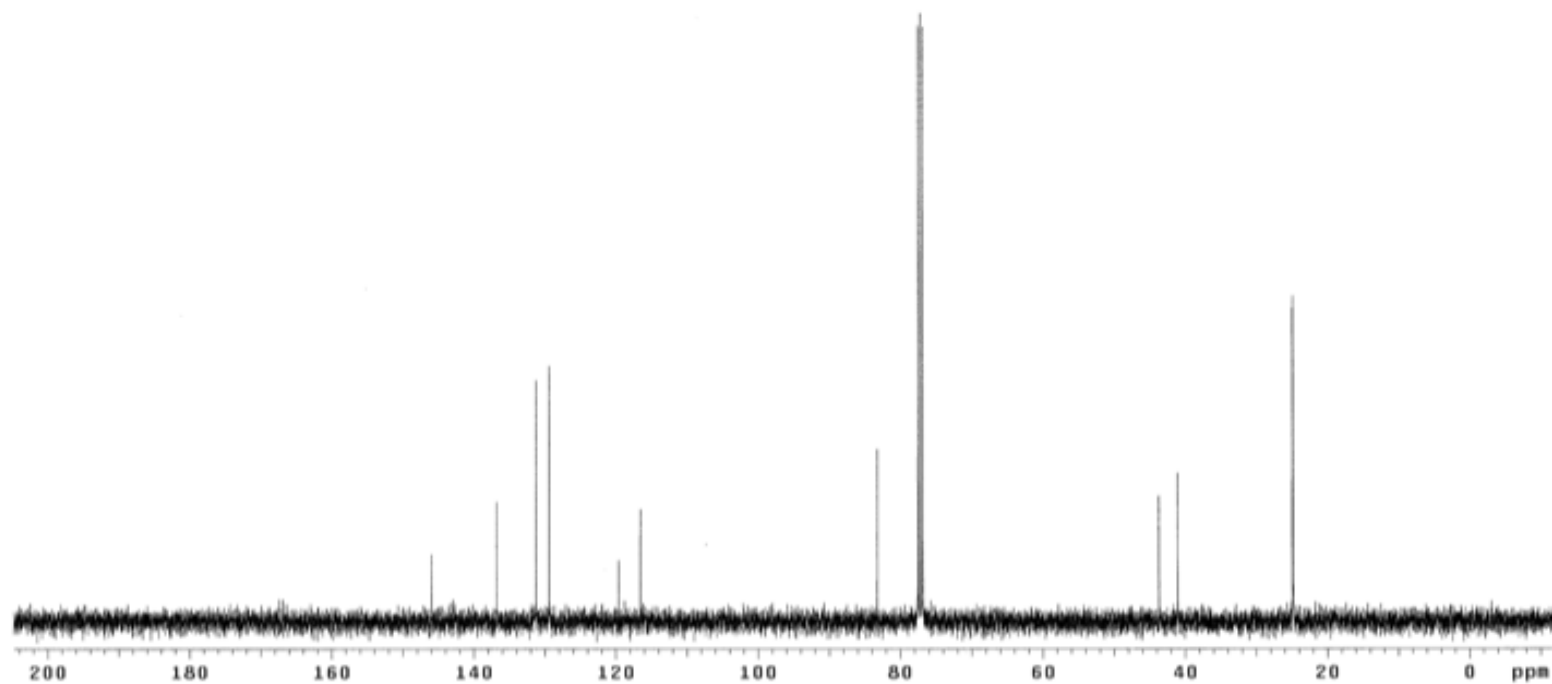

Sample Name: SR-IV-268-oxid  
Data Collected on: nmr14-vnars488  
Archive directory:  
Sample directory:  
FidFile: PROTON  
Pulse Sequence: PROTON (s2pu1)  
Solvent: cdcl3  
Data collected on: Mar 26 2015

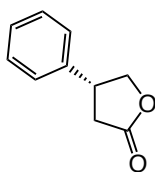

38

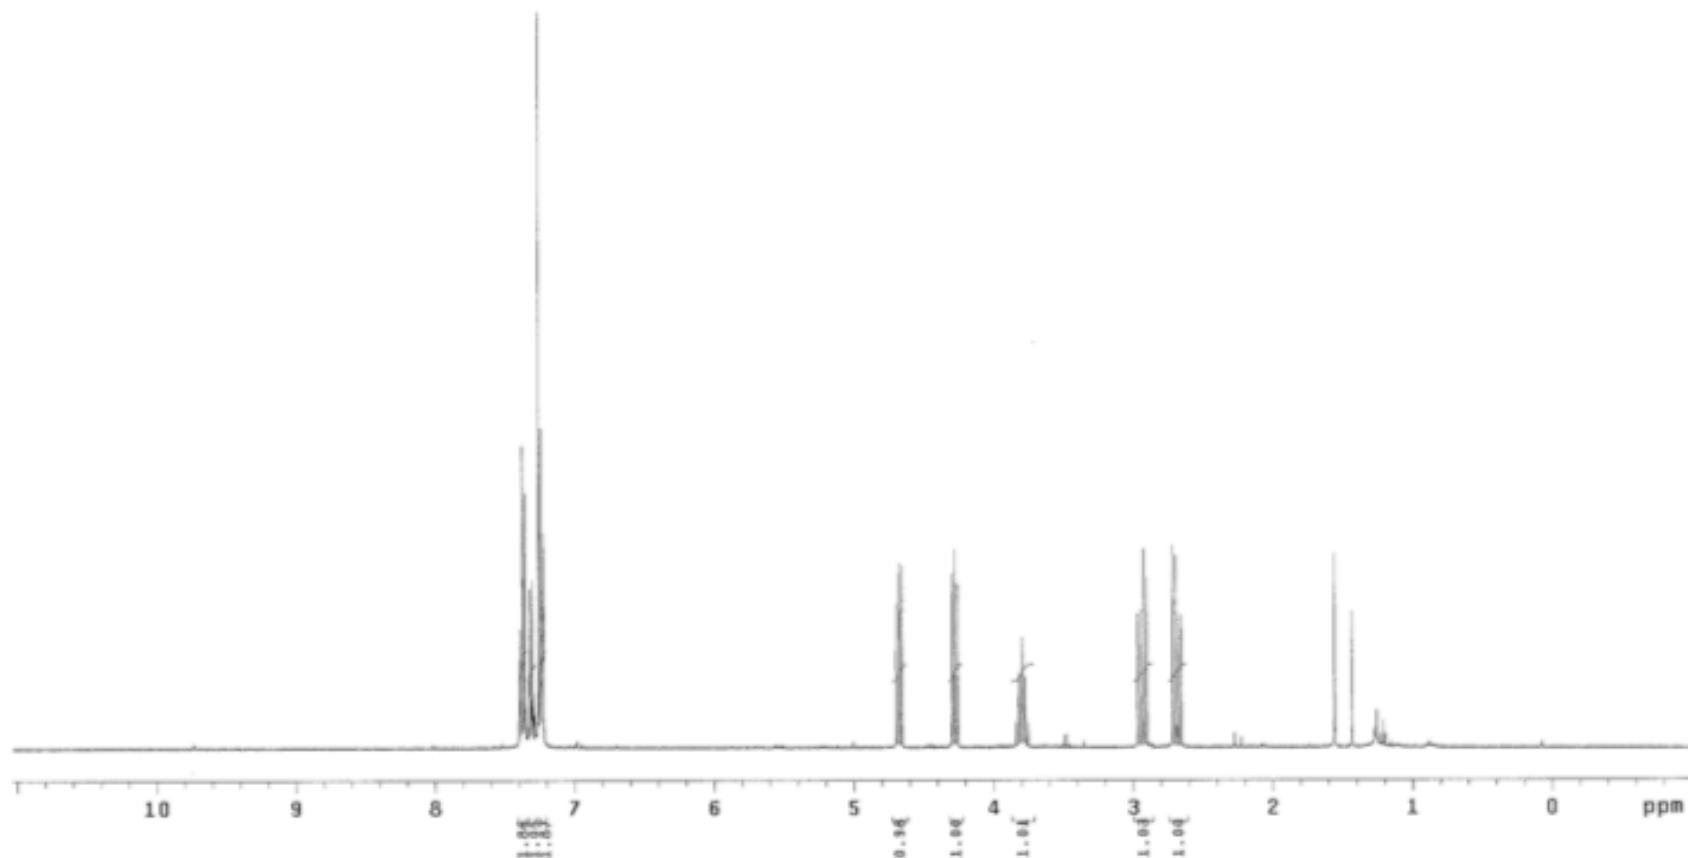

Supplement: NIHMS927337-supplement-SI.pdf [file NIHMS927337-supplement-SI.pdf]
